# Supplementary material for: Simplified radiolabeling process toward rapid photoredox-catalyzed aryl 18F-fluorination and PET tracer development
Source: Research Square preprint supplement (doi:10.21203/rs.3.rs-4325597/v1), 2025-02-10

# Simplified radiolabeling process toward rapid photoredox-catalyzed aryl <sup>18</sup>F-fluorination and PET tracer development

Yueqi Wang<sup>1#</sup>, Lili Pan<sup>1#</sup>, Kai Lu<sup>#1</sup>, Mingxing Hu<sup>1</sup>, Cheng Zheng<sup>1</sup>, Mufeng, Li<sup>1</sup>, Yang Xie<sup>1</sup>, Cheng Yang<sup>2</sup>, Hongbao Sun<sup>2</sup>, Xiaoi, Wu<sup>1</sup>, Haoxing Wu<sup>2</sup> and Wei Chen<sup>\*1</sup>

<sup>1</sup>Department of Nuclear Medicine & Clinical Nuclear Medicine Research Lab, West China Hospital, Sichuan University, Chengdu, Sichuan, 610041, China

<sup>2</sup>Huaxi MR Research Center, Department of Radiology, Functional and Molecular Imaging Key Laboratory of Sichuan Province, Frontiers Science Center for Disease-Related Molecular Network, West China Hospital, Sichuan University, Chengdu 610041, Sichuan, China

Y.W., L.P., and K.L. contributed equally to this work.

Correspondence to: weichen98@scu.edu.cn (W.C.)

This PDF file includes:

|                                                                                                                                           |             |
|-------------------------------------------------------------------------------------------------------------------------------------------|-------------|
| <b>1. General information</b>                                                                                                             | <b>S2</b>   |
| <b>2. Preparation of arene substrates and standards</b>                                                                                   | <b>S2</b>   |
| <b>3. Radiolabeling experiments</b>                                                                                                       | <b>S41</b>  |
| 3.1 Reagents and equipment information                                                                                                    | S42         |
| 3.2 General procedure for anion-exchange resin preconditioning                                                                            | S43         |
| 3.3 Preparation of azeotropic drying-free <sup>18</sup> F <sup>-</sup> solution                                                           | S43         |
| 3.4 Aryl <sup>18</sup> F-fluorination optimization with a portion of the drying-free <sup>18</sup> F <sup>-</sup> solution                | S43         |
| 3.5 Full-batch aryl <sup>18</sup> F-fluorination optimization                                                                             | S44         |
| 3.6 General HPLC conditions                                                                                                               | S45         |
| 3.7 Preparation of standard eluent                                                                                                        | S45         |
| 3.8 General procedure for the photoredox-mediated azeotropic drying-free aryl <sup>18</sup> F-fluorination                                | S45         |
| 3.9 Radio-HPLC analysis and RCC calculation of the <sup>18</sup> F-radiolabeled arenes                                                    | S45         |
| 3.10 Molar activity calculation of 2- <sup>18</sup> F from radiodeoxyfluorination of <b>2-deo</b>                                         | S122        |
| 3.11 Scale-up <sup>18</sup> F-labelling of FDOPA precursor <b>68</b> on a LED reactor                                                     | S123        |
| 3.12 Automatic synthesis of [ <sup>18</sup> F]FDOPA                                                                                       | S125        |
| <b>4. PET tracer preparation and imaging study</b>                                                                                        | <b>S129</b> |
| 4.1 Preparation of PET tracers <sup>18</sup> F-MFPG, <i>L</i> - <sup>18</sup> F-MFPG and <i>D</i> - <sup>18</sup> F-MFPG                  | S129        |
| 4.2 Racemization monitoring of the PET tracers                                                                                            | S132        |
| 4.3 Confirmation of the absolute configuration of the two enantiomers <i>L</i> - <sup>18</sup> F-MFPG and <i>D</i> - <sup>18</sup> F-MFPG | S133        |
| 4.4 PET imaging studies                                                                                                                   | S135        |
| <b>5. Reference</b>                                                                                                                       | <b>S136</b> |
| <b>6. NMR spectra (<sup>1</sup>H NMR, <sup>13</sup>C NMR, <sup>19</sup>F NMR)</b>                                                         | <b>S137</b> |

## 1. General information

**Methods and materials:** Commercially available chemicals reagents purchased from Sigma-Aldrich, TCI, Acros, J&K Scientific, Bidepharmatech, *etc* and used directly without further purification. Nuclear magnetic resonance spectra were obtained on a Bruker nuclear magnetic resonance spectrometer. All spectra are reported as parts per million.  $^1\text{H}$ ,  $^{13}\text{C}$ , and  $^{19}\text{F}$  NMR data are reported as follows: chemical shift (ppm), multiplicity (s = singlet, d = doublet, t = triplet, q = quartet, quint = quintet, dd = doublet of doublets, td = triplet of doublets, ddd = double of doublet of doublets, m = multiples), coupling constants (Hz), and integration. High-resolution mass spectra (HRMS) were analysed on a high-resolution quadrupole-orbitrap tandem mass spectrometer (Q-Exactive; Thermo Fisher Scientific, Waltham, MA, USA) with an electrospray ionisation (ESI) probe operated in the positive-ion mode.

## 2. Preparation of arene substrates and standards

### General procedures for alkyl aryl ethers (A)

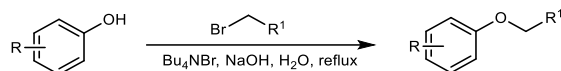

To a solution of the phenols (1 equiv.), tetrabutylammonium bromide (0.05 equiv.), NaOH (2.0 equiv.) in  $\text{H}_2\text{O}$  (15 mL) was added to the alkyl bromide (4 equiv.). The mixture was stirred under reflux overnight. The reaction was extracted with dichloromethane or ethyl acetate. The organic phase was washed with 1M NaOH solution, water, saturated brine, dried with  $\text{Na}_2\text{SO}_4$ , filtered, and concentrated in vacuo and purified by silica gel column with hexane/ethyl acetate as the eluent to give the alkyl aryl ethers.

### General procedure for Boc protection of phenol or amine (B)

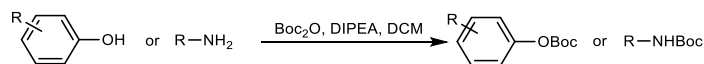

To a solution of phenol or amine (1.0 equiv.) in DCM (10 mL) was added DIPEA (1.5 equiv.) and di-tert-butyl 2ptimized2o (1.2 equiv.). The reaction was stirred under room temperature for 2 h and then extracted with ethyl acetate and water. The organic phase was washed with water and sat. NaCl solution, dried with  $\text{Na}_2\text{SO}_4$ , filtered, and concentrated in vacuo to give the crude product, which was purified by silica gel column with PE/EA as the eluant to give the Boc-protected phenols or amines

### General procedures for the synthesis of alkyl aryl ethers ©

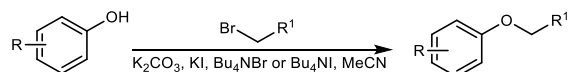

To a solution of phenol (1.0 equiv.) in MeCN (10 mL) was added  $\text{K}_2\text{CO}_3$  (1.8 equiv.), KI (10%),  $\text{Bu}_4\text{NBr}$  (10%), and alkyl

bromide or alkyl chloride (1.2 equiv.). The reaction was stirred under 80 °C overnight and then extracted with ethyl acetate and water. The organic phase was dried with Na<sub>2</sub>SO<sub>4</sub>, filtered, and concentrated in vacuo to give the crude product, which was purified by a silica gel column with PE/EA as the eluant to give the alkyl aryl ethers.

#### General procedure for the synthesis of azides (D)

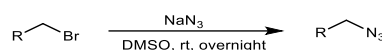

To the solution of alkyl bromide (1.0 equiv.) in DMSO (2.0 mL) was added sodium azide (1.2 equiv.). The reaction mixture was stirred at room temperature overnight. After reaction completion, as monitored by TLC, the reaction mixture was extracted with Et<sub>2</sub>O (3 × 15 mL) and washed with brine. The combined organic extracts were dried with anhydrous Na<sub>2</sub>SO<sub>4</sub>, filtered, and concentrated under reduced pressure, and the residue was purified by silica gel column chromatography (PE : EA = 30:1 to 20:1) to afford the corresponding azide products.

#### General procedure for the synthesis of tetrazines ©

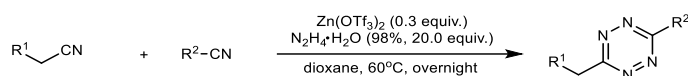

To the mixture of alkyl nitrile (1.0 equiv.), aryl nitrile (3–15 equiv.), and Zn(OTf)<sub>2</sub> (922 mg, 6.798 mmol, 0.3 equiv.) in 1,4-dioxane (12 mL) was added hydrazine hydrate (98%, 20.0 equiv.). The mixture was stirred at 60 °C overnight. After reaction completion, as monitored by TLC, the reaction mixture was cooled with ice water, and added DCM as cosolvent. An ice water solution of sodium nitrite (20.0 equiv.) was slowly added into the reaction mixture, followed by a slow addition of 1M HCl, during which the solution was stirred intensely and turned bright red, and gas evolved. Addition of 1M HCl continued until gas evolution ceased and the pH value was 3–4. Then, the reaction mixture was extracted with DCM (3 × 20 mL). The extract was combined, dried over anhydrous Na<sub>2</sub>SO<sub>4</sub>, filtered, and concentrated under reduced pressure, and the residue was purified by silica gel column chromatography (PE : EtOAc = 20:1) to afford corresponding tetrazine as a red solid.

#### General procedure for the copper-catalyzed coupling of aryl boronic acid and alcohol (F)

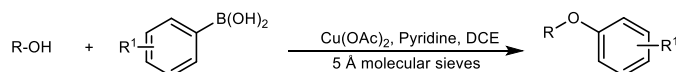

To a solution of pyridine (1 equiv.) in DCE (2 mL) were added Cu(OAc)<sub>2</sub> (30% mmol) and 5 Å molecular sieves (300 mg). The mixture was stirred at room temperature for 5 mins. (4-fluorophenyl)boronic acid (2 equiv.) and (2S,3R,4S,5R,6R)-6-(hydroxymethyl)tetrahydro-2H-pyran-2,3,4,5-tetraol tetraacetate (1 equiv.) were then added to the reaction. The reaction was stirred overnight at room temperature. The citric acid aqueous solution (5 mL, 1M) was added, and the reaction was extracted with dichloromethane. The organic layers were combined and washed with saturated sodium chloride aqueous solution, dried over anhydrous sodium sulfate, filtered, and evaporated under reduced pressure. The residue was purified by silica gel column chromatography (PE: EA = 5:1) to obtain the O-arylated compounds<sup>[1]</sup>

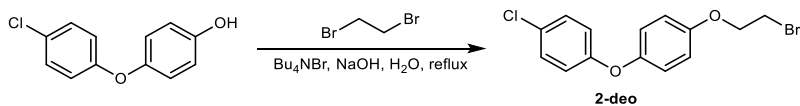

**1-(2-bromoethoxy)-4-(4-chlorophenoxy)benzene (2-deo).** To a solution of 4-(4-Chlorophenoxy)phenol (1.0 g, 4.5 mmol, 1.0 equiv.), tetrabutylammonium bromide (70 mg, 0.225 mmol, 0.05 equiv.), NaOH (360 mg, 9 mmol, 2.0 equiv.) in H<sub>2</sub>O (15 mL) was added 1,2-dibromoethane (1.56 mL, 18.1 mmol, 4 equiv.). The mixture was stirred under reflux overnight. The reaction was extracted with dichloromethane (3 × 15 mL). The organic phase was washed with 1M NaOH solution, water, saturated brine, dried with Na<sub>2</sub>SO<sub>4</sub>, filtered, and concentrated in vacuo and purified by silica gel column with hexane/ethyl acetate (40:1 to 20:1) as the eluent to give the **2-deo** as a white solid (0.88g, 59.3 %).

**<sup>1</sup>H NMR** (400 MHz, Chloroform-*d*) δ 7.26 – 7.24 (m, 2H), 6.96 (d, *J* = 9.1 Hz, 2H), 6.90 (d, *J* = 9.1 Hz, 2H), 6.87 (d, *J* = 8.9 Hz, 2H), 4.28 (t, *J* = 6.2 Hz, 2H), 3.64 (t, *J* = 6.2 Hz, 2H).

**<sup>13</sup>C NMR** (101 MHz, CDCl<sub>3</sub>) δ 157.09, 154.71, 150.67, 129.74, 127.71, 120.93, 119.09, 116.22, 68.62, 29.25.

**HRMS** (ESI) *m/z*: [M+H]<sup>+</sup> Calcd for C<sub>14</sub>H<sub>13</sub>BrClO<sub>2</sub><sup>+</sup>: 326.9782; Found: 326.9782.

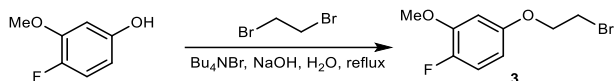

**4-(2-bromoethoxy)-1-fluoro-2-methoxybenzene (3).** To a solution of the 4-fluoro-3-methoxyphenol (1.42 g, 10 mmol, 1.0 equiv.) in H<sub>2</sub>O (20 mL) was added Bu<sub>4</sub>NBr (142 mg, 10%), sodium hydroxide (800 mg, 20 mmol, 2.0 equiv.) and 1,2-dibromoethane (3.6 mL, 80 mmol, 4.0 equiv.). The reaction was stirred under reflux overnight and then extracted with ethyl acetate and water. The organic phase was dried with Na<sub>2</sub>SO<sub>4</sub>, filtered, and concentrated in vacuo to give the crude product, which was purified by silica gel column with PE/EA = 7/1 as the eluant to give the title compound as a white solid (1.72 g, 69.1%)

**<sup>1</sup>H NMR** (400 MHz, Chloroform-*d*) δ 6.97 (dd, *J* = 11.0, 8.9 Hz, 1H), 6.57 (dd, *J* = 7.2, 2.9 Hz, 1H), 6.36 (dt, *J* = 8.9, 3.1 Hz, 1H), 4.25 (t, *J* = 6.1 Hz, 2H), 3.86 (s, 3H), 3.62 (t, *J* = 6.2 Hz, 2H).

**<sup>13</sup>C NMR** (100 MHz, Chloroform-*d*) δ 154.62 (d, *J* = 2.3 Hz), 148.29 (d, *J* = 12.0 Hz), 147.69 (d, *J* = 238.8 Hz), 115.78 (d, *J* = 19.7 Hz), 104.60 (d, *J* = 6.6 Hz), 102.20, 68.53, 56.23, 29.12.

**<sup>19</sup>F NMR** (376 MHz, Chloroform-*d*) δ -144.44.

**HRMS** (ESI): [M+H]<sup>+</sup> Calcd for C<sub>9</sub>H<sub>11</sub>BrFO<sub>2</sub><sup>+</sup>: 248.9921; Found: 248.9922.

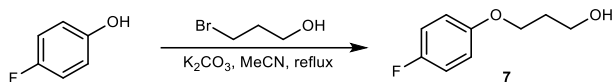

**3-(4-fluorophenoxy)propan-1-ol (7).** To a solution of 4-fluorophenol (336 mg, 3.0 mmol, 1.0 equiv.) and 3-bromopropan-1-ol (500 mg, 3.6 mmol, 1.2 equiv.) in MeCN (10 mL) was added K<sub>2</sub>CO<sub>3</sub> (621 mg, 4.5 mmol, 1.5 equiv.). The reaction



was stirred under reflux overnight and then extracted with ethyl acetate and water. The organic phase was dried with Na<sub>2</sub>SO<sub>4</sub>, filtered, and concentrated in vacuo to give the crude product, which was purified by silica gel column with PE/EA=5/1 as the eluant to give the title compound as a colorless oil (502 mg, 98.4%).

**<sup>1</sup>H NMR** (400 MHz, Chloroform-*d*) δ 7.01 – 6.92 (m, 2H), 6.89 – 6.80 (m, 2H), 4.09 (t, *J* = 6.0 Hz, 2H), 3.86 (t, *J* = 5.9 Hz, 2H), 2.04 (p, *J* = 5.9 Hz, 2H), 1.73 (br, 1H).

**<sup>13</sup>C NMR** (100 MHz, Chloroform-*d*) δ 157.32 (d, *J* = 238.3 Hz), 154.90 (d, *J* = 2.1 Hz), 115.82 (d, *J* = 23.1 Hz), 115.46 (d, *J* = 8.0 Hz), 66.33, 60.38, 32.00.

**<sup>19</sup>F NMR** (376 MHz, Chloroform-*d*) δ -123.89.

**HRMS** (ESI) *m/z*: [M+H]<sup>+</sup> Calcd for C<sub>9</sub>H<sub>12</sub>FO<sub>2</sub><sup>+</sup>: 171.0816; Found: 171.0806.

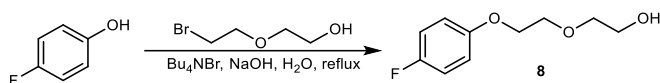

**2-(2-(4-fluorophenoxy)ethoxy)ethan-1-ol (8)**. Following the general preparation procedure A, the title compound was obtained as a colourless oil (216 mg, 36%) from 4-fluorophenol (336 mg, 3.0 mmol, 1.0 equiv.) and 2-(2-bromoethoxy)ethan-1-ol (1.3 ml, 12.0 mmol, 4.0 equiv.).

**<sup>1</sup>H NMR** (400 MHz, Chloroform-*d*) δ 6.99 – 6.95 (m, 2H), 6.91 – 6.80 (m, 2H), 4.10 (dd, *J* = 5.6, 3.7 Hz, 2H), 3.86 (dd, *J* = 6.0, 3.4 Hz, 2H), 3.81 – 3.73 (m, 2H), 3.67 (t, *J* = 4.4 Hz, 2H), 2.09 (br, 1H).

**<sup>13</sup>C NMR** (100 MHz, Chloroform-*d*) δ 157.43 (d, *J* = 238.4 Hz), 154.79 (d, *J* = 2.1 Hz), 115.85 (d, *J* = 23.1 Hz), 115.67 (d, *J* = 8.0 Hz), 72.58, 69.70, 68.08, 61.80.

**<sup>19</sup>F NMR** (376 MHz, Chloroform-*d*) δ -123.62.

**HRMS** (ESI) *m/z*: [M+Na]<sup>+</sup> Calcd for C<sub>10</sub>H<sub>13</sub>FO<sub>3</sub>Na<sup>+</sup>: 223.0741; Found: 223.0739.

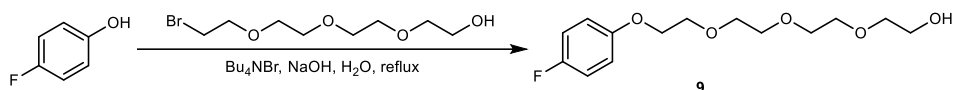

**2-(2-(2-(2-(4-fluorophenoxy)ethoxy)ethoxy)ethoxy)ethan-1-ol (9)**. Following the general preparation procedure A, the title compound was obtained from 4-fluorophenol (336 mg, 3.0 mmol, 1.0 equiv.) and 2-(2-(2-(2-bromoethoxy)ethoxy)ethoxy)ethan-1-ol (921 mg, 12.0 mmol, 4.0 equiv.) as a colorless oil (283 mg, 32.7%).

**<sup>1</sup>H NMR** (400 MHz, Chloroform-*d*) δ 7.01 – 6.91 (m, 2H), 6.90 – 6.82 (m, 2H), 4.12 – 4.07 (m, 2H), 3.86 – 3.82 (m, 2H), 3.77 – 3.65 (m, 11H), 3.63 – 3.59 (m, 2H).

**<sup>13</sup>C NMR** (100 MHz, Chloroform-*d*) δ 157.36 (d, *J* = 238.1 Hz), 154.87 (d, *J* = 2.2 Hz), 115.79 (d, *J* = 18.0 Hz), 115.64 (d, *J* = 2.9 Hz), 72.55, 70.80, 70.66, 70.59, 70.32, 69.76, 68.07, 61.75.

**<sup>19</sup>F NMR** (376 MHz, Chloroform-*d*) δ -123.88.

**HRMS** (ESI)  $m/z$ :  $[M+Na]^+$  Calcd for  $C_{14}H_{21}FO_5Na^+$ : 311.1265; Found: 311.1262.

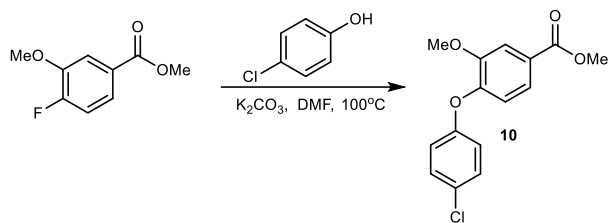

**methyl 4-(4-chlorophenoxy)-3-methoxybenzoate (10)**. To a solution of methyl 4-fluoro-3-methoxybenzoate (920 mg, 5.0 mmol, 1.0 equiv.) and 4-chlorophenol (775 mg, 6.0 mmol, 1.2 equiv.) in DMF (10 mL) was added  $K_2CO_3$  (1.25 g, 9.0 mmol, 1.8 equiv.). The reaction was stirred under 100 °C overnight and then extracted with ethyl acetate and water. The organic phase was washed with water and sat. NaCl solution dried with  $Na_2SO_4$ , filtered, and concentrated in vacuo to give the crude product, which was purified by silica gel column with PE/EA = 10/1 as the eluant to give the title compound as a white solid (192 mg, 13.2%). Spectra data matched the reported literature.<sup>[2]</sup>

**$^1H$  NMR** (400 MHz, Chloroform- $d$ )  $\delta$  7.67 (d,  $J$  = 1.9 Hz, 1H), 7.62 (dd,  $J$  = 8.3, 1.9 Hz, 1H), 7.32 – 7.27 (m, 2H), 6.95 – 6.88 (m, 3H), 3.92 (s, 3H), 3.91 (s, 3H).

**$^{13}C$  NMR** (100 MHz, Chloroform- $d$ )  $\delta$  166.51, 155.26, 150.52, 149.50, 129.77, 128.68, 126.32, 123.14, 119.67, 118.91, 113.62, 56.12, 52.24.

**HRMS** (ESI)  $m/z$ :  $[M+H]^+$  Calcd for  $C_{15}H_{14}ClO_4^+$ : 293.0575; Found: 293.0573.

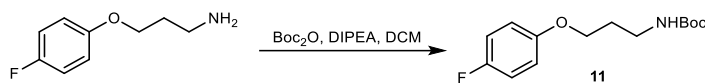

**tert-butyl (3-(4-fluorophenoxy)propyl)carbamate (11)**. The title compound was prepared according to the general procedure **B** and obtained as a colourless oil (310 mg, 97.5%) from 3-(4-fluorophenyl)propan-1-amine (200 mg, 1.2 mmol).

**$^1H$  NMR** (400 MHz, Chloroform- $d$ )  $\delta$  6.96 (t,  $J$  = 8.6 Hz, 2H), 6.82 (dd,  $J$  = 9.2, 4.2 Hz, 2H), 4.75 (br, 1H), 3.98 (t,  $J$  = 6.0 Hz, 2H), 3.32 (q,  $J$  = 6.5 Hz, 2H), 1.96 (p,  $J$  = 6.4 Hz, 2H), 1.44 (s, 9H).

**$^{13}C$  NMR** (100 MHz, Chloroform- $d$ )  $\delta$  157.29 (d,  $J$  = 238.3 Hz), 156.01, 154.90 (d,  $J$  = 2.2 Hz), 115.92, 115.69, 115.48, 115.40, 79.26, 66.45, 38.01, 29.60, 28.41.

**$^{19}F$  NMR** (376 MHz, Chloroform- $d$ )  $\delta$  -123.96.

**HRMS** (ESI)  $m/z$ :  $[M+Na]^+$  Calcd for  $C_{14}H_{20}FNO_3Na^+$ : 292.1319; Found: 292.1319.

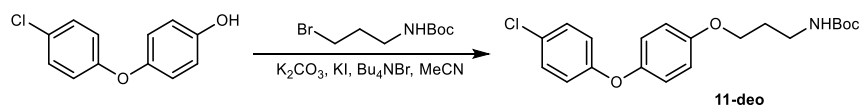

**tert-butyl (3-(4-(4-chlorophenoxy)phenoxy)propyl)carbamate (11-deo)**. The title compound was prepared according to the

general procedure **C** and obtained as a white solid (671mg, 86.9%) from 4-(4-chlorophenoxy)phenol (450 mg, 2.05 mmol).

**<sup>1</sup>H NMR** (400 MHz, Chloroform-*d*)  $\delta$  7.29 – 7.18 (m, 2H), 7.00 – 6.91 (m, 2H), 6.91 – 6.81 (m, 4H), 4.77 (br, 1H), 4.00 (t,  $J$  = 6.0 Hz, 2H), 3.33 (q,  $J$  = 6.4 Hz, 2H), 1.98 (p,  $J$  = 6.3 Hz, 2H), 1.44 (s, 9H).

**<sup>13</sup>C NMR** (100 MHz, Chloroform-*d*)  $\delta$  157.17, 156.01, 155.35, 149.92, 129.56, 127.40, 120.83, 118.80, 115.60, 79.26, 66.32, 38.05, 29.62, 28.43.

**HRMS** (ESI)  $m/z$ : [M+Na]<sup>+</sup> Calcd for C<sub>20</sub>H<sub>24</sub>ClNO<sub>4</sub>Na<sup>+</sup>: 400.1286; Found: 400.1283.

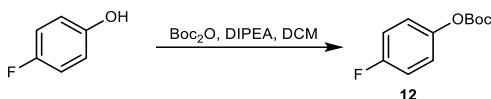

**tert-butyl (4-fluorophenyl) carbonate (12).** The title compound was prepared according to the general procedure **B** and obtained as a white solid (415, 97%) from 4-fluorophenol (224 mg, 2.0 mmol)

**<sup>1</sup>H NMR** (400 MHz, Chloroform-*d*)  $\delta$  7.13 (ddt,  $J$  = 8.1, 5.9, 2.9 Hz, 2H), 7.09 – 7.00 (m, 2H), 1.55 (s, 9H).

**<sup>13</sup>C NMR** (100 MHz, Chloroform-*d*)  $\delta$  160.16 (d,  $J$  = 244.1 Hz), 151.91, 146.96 (d,  $J$  = 2.9 Hz), 122.71 (d,  $J$  = 8.4 Hz), 115.99 (d,  $J$  = 23.6 Hz), 83.77, 27.68.

**<sup>19</sup>F NMR** (376 MHz, Chloroform-*d*)  $\delta$  -117.14.

**HRMS** (ESI)  $m/z$ : [M+H]<sup>+</sup> Calcd for C<sub>11</sub>H<sub>14</sub>FO<sub>3</sub><sup>+</sup>: 213.0921; Found: 213.0932.

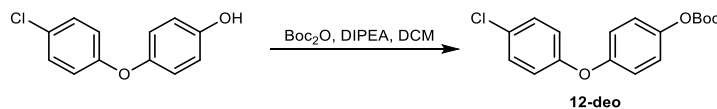

**tert-butyl (4-(4-chlorophenoxy)phenyl) carbonate (12-deo).** The title compound was prepared according to the general procedure **B** and obtained as a white solid (305 mg, 95.3%) from 4-(4-chlorophenoxy)phenol (220 mg, 1.0 mmol).

**<sup>1</sup>H NMR** (400 MHz, Chloroform-*d*)  $\delta$  7.31 – 7.26 (m, 2H), 7.17 – 7.11 (m, 2H), 7.01 – 6.96 (m, 2H), 6.96 – 6.89 (m, 2H), 1.56 (s, 9H).

**<sup>13</sup>C NMR** (100 MHz, Chloroform-*d*)  $\delta$  155.98, 154.27, 152.06, 146.87, 129.77, 128.36, 122.65, 119.91, 119.70, 83.72, 27.71.

**HRMS** (ESI)  $m/z$ : [M+Na]<sup>+</sup> Calcd for C<sub>17</sub>H<sub>17</sub>ClO<sub>4</sub>Na<sup>+</sup>: 343.0708; Found: 343.0701.

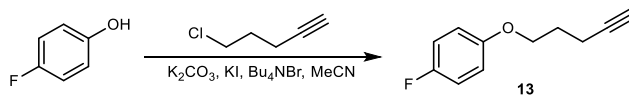

**5-fluoro-4-(pent-4-yn-1-yloxy)benzene (13).** Following the general preparation procedure of **C**, the title compound was obtained as a yellow liquid (152 mg, 42.7%) from 4-fluorophenol (224 mg, 2.0 mmol, 1.0 equiv.) and 5-chloropent-1-yne (245 mg, 2.4 mmol, 1.2 equiv.).

**<sup>1</sup>H NMR** (400 MHz, Chloroform-*d*)  $\delta$  7.01 – 6.91 (m, 2H), 6.90 – 6.78 (m, 2H), 4.02 (t,  $J$  = 6.1 Hz, 2H), 2.40 (td,  $J$  = 7.0, 2.6 Hz, 2H), 2.05 – 1.97 (m, 3H).

**<sup>13</sup>C NMR** (100 MHz, Chloroform-*d*)  $\delta$  157.26 (d,  $J$  = 238.0 Hz), 155.02 (d,  $J$  = 2.0 Hz), 115.90, 115.67, 115.53, 115.45, 83.41,

68.92, 66.78, 28.18, 15.15.

$^{19}\text{F}$  NMR (376 MHz, Chloroform-*d*)  $\delta$  -124.09.

HRMS (ESI) *m/z*:  $[\text{M}+\text{H}]^+$  Calcd for  $\text{C}_{11}\text{H}_{12}\text{FO}^+$ : 179.0867; Found: 179.0869.

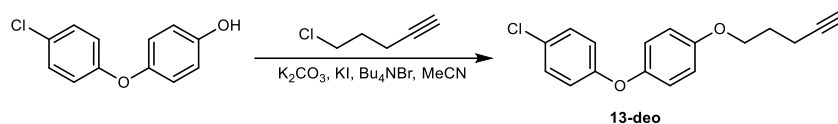

**5-chloro-4-(4-(pent-4-yn-1-yloxy)phenoxy)benzene (13-deo).** Following the general preparation procedure C, the title compound was obtained from 4-(4-chlorophenoxy)phenol (450 mg, 2.05 mmol, 1.0 equiv.) and 5-chloropent-1-yne (251 mg, 2.46 mmol, 1.2 equiv.) as a white solid (420 mg, 71.8%).

$^1\text{H}$  NMR (400 MHz, Chloroform-*d*)  $\delta$  7.24 (dd,  $J$  = 9.0, 2.3 Hz, 2H), 6.98 – 6.92 (m, 2H), 6.91 – 6.83 (m, 4H), 4.05 (t,  $J$  = 6.1 Hz, 2H), 2.42 (td,  $J$  = 7.0, 2.6 Hz, 2H), 2.05 – 1.98 (m, 2H), 1.97 (d,  $J$  = 2.6 Hz, 1H).

$^{13}\text{C}$  NMR (100 MHz, Chloroform-*d*)  $\delta$  157.21, 155.46, 149.85, 129.55, 127.37, 120.83, 118.79, 115.64, 83.45, 68.92, 66.63, 28.21, 15.19.

HRMS (ESI) *m/z*:  $[\text{M}+\text{H}]^+$  Calcd for  $\text{C}_{17}\text{H}_{16}\text{ClO}_2^+$ : 287.0833; Found: 287.0830.

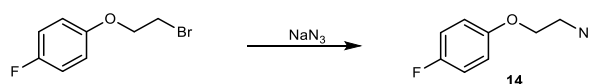

**1-(2-azidoethoxy)-4-fluorobenzene (14).** The title compound was prepared according to the general procedure D from 1-(2-bromoethoxy)-4-fluorobenzene (65.7 mg, 0.30 mmol, 1.0 equiv.) and obtained as a colourless oil (52.5 mg, 0.29 mmol, 97%).

$^1\text{H}$  NMR (400 MHz, Chloroform-*d*)  $\delta$  7.04 – 6.93 (m, 2H), 6.86 (dd,  $J$  = 9.2, 4.3 Hz, 2H), 4.14 – 4.07 (m, 2H), 3.58 (t,  $J$  = 5.0 Hz, 2H).

$^{13}\text{C}$  NMR (100 MHz, Chloroform-*d*)  $\delta$  157.62 (d,  $J$  = 239.0 Hz), 154.38 (d,  $J$  = 2.2 Hz), 116.07, 115.84, 115.76, 115.68, 67.67, 50.18.

$^{19}\text{F}$  NMR (376 MHz, Chloroform-*d*)  $\delta$  -123.12.

HRMS (ESI) *m/z*:  $[\text{M}]^+$  Calcd for  $\text{C}_8\text{H}_8\text{FN}_3\text{O}^+$ : 181.0651; Found: 181.0660.

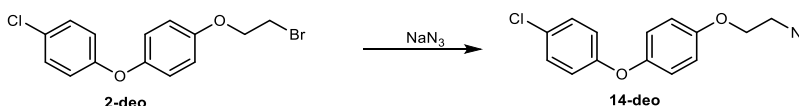

**1-(2-azidoethoxy)-4-(4-chlorophenoxy)benzene (14-deo).** The title compound was prepared according to the general procedure D from compound 2-deo (98.3 mg, 0.30 mmol, 1.0 equiv.) and obtained as a colourless oil (85.2 mg, 98%).

$^1\text{H}$  NMR (400 MHz, Chloroform-*d*)  $\delta$  7.29 – 7.20 (m, 2H), 7.01 – 6.93 (m, 2H), 6.93 – 6.83 (m, 4H), 4.13 (t,  $J$  = 5.0 Hz, 2H),

3.59 (t,  $J = 5.0$  Hz, 2H).

$^{13}\text{C}$  NMR (100 MHz, Chloroform- $d$ )  $\delta$  157.01, 154.74, 150.45, 129.61, 127.55, 120.82, 118.94, 115.84, 67.53, 50.21.

HRMS (ESI)  $m/z$ :  $[\text{M}]^+$  Calcd for  $\text{C}_{14}\text{H}_{12}\text{ClN}_3\text{O}_2^+$ : 289.0618; Found: 289.0622.

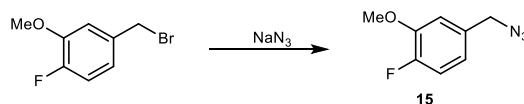

**4-(azidomethyl)-1-fluoro-2-methoxybenzene (15).** The title compound was prepared according to the general procedure **D** from 4-(bromomethyl)-1-fluoro-2-methoxybenzene (65.7 mg, 0.30 mmol, 1.0 equiv.) and obtained as a colourless oil (52.2 mg, 96%).

$^1\text{H}$  NMR (400 MHz, Chloroform- $d$ )  $\delta$  6.99 (dd,  $J = 11.1, 8.2$  Hz, 1H), 6.84 (dd,  $J = 8.1, 2.1$  Hz, 1H), 6.76 (ddd,  $J = 8.3, 4.3, 2.1$  Hz, 1H), 4.22 (s, 2H), 3.83 (s, 3H).

$^{13}\text{C}$  NMR (100 MHz, Chloroform- $d$ )  $\delta$  151.27 (d,  $J = 246.7$  Hz), 146.91 (d,  $J = 11.0$  Hz), 130.69 (d,  $J = 3.9$  Hz), 119.57 (d,  $J = 7.2$  Hz), 115.17 (d,  $J = 18.6$  Hz), 112.23 (d,  $J = 2.2$  Hz), 55.22, 53.41.

$^{19}\text{F}$  NMR (376 MHz, Chloroform- $d$ )  $\delta$  -135.52.

HRMS (ESI)  $m/z$ :  $[\text{M}+\text{Na}]^+$  Calcd for  $\text{C}_8\text{H}_8\text{FN}_3\text{O}_2^+$ : 204.0544; Found: 204.0547.

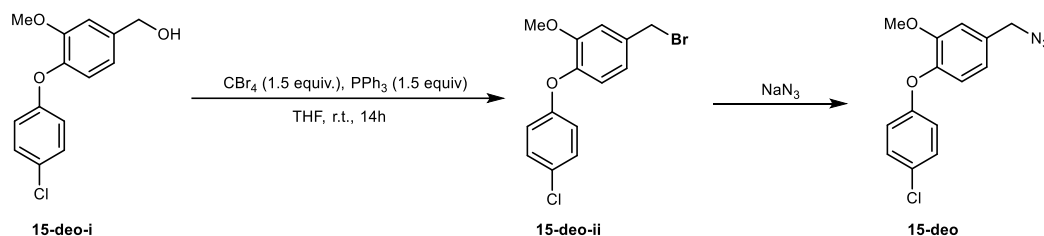

**4-(bromomethyl)-1-(4-chlorophenoxy)-2-methoxybenzene (15-deo-ii).** The THF (1.5 ml) solution of **15-deo-i**<sup>[2]</sup> (50.0 mg, 0.188 mmol, 1.0 equiv.),  $\text{CBr}_4$  (93.5 mg, 0.282 mmol, 1.5 equiv.) and  $\text{PPh}_3$  (74.0 mg, 0.282 mmol, 1.5 equiv.) were stirred at room temperature for 14 h under an argon atmosphere. After reaction completion, as monitored by TLC, the reaction mixture was poured into petroleum ether (PE, 10 mL), filtered, and concentrated under reduced pressure and the residue was purified by silica gel column chromatography (PE : EtOAc = 10:1) to afford the title compound as a colourless oil (59.2 mg, 96%).

**4-(azidomethyl)-1-(4-chlorophenoxy)-2-methoxybenzene (15-deo).** The title compound was prepared according to the general procedure **D** from compound **15-deo-ii** (49.1 mg, 0.15 mmol, 1.0 equiv.) and obtained as a colourless oil (41.7 mg, 0.144 mmol, 96%).

$^1\text{H}$  NMR (400 MHz, Chloroform- $d$ )  $\delta$  7.28 – 7.20 (m, 2H), 6.96 (d,  $J = 7.6$  Hz, 2H), 6.91 – 6.83 (m, 3H), 4.34 (s, 2H), 3.85 (s, 3H).

$^{13}\text{C}$  NMR (100 MHz, Chloroform- $d$ )  $\delta$  156.38, 151.54, 144.71, 132.50, 129.53, 127.65, 121.08, 120.88, 118.47, 112.63, 56.03, 54.62.

**HRMS** (ESI)  $m/z$ :  $[M]^+$  Calcd for  $C_{14}H_{12}ClN_3O_2^+$ : 289.0618; Found: 289.0624.

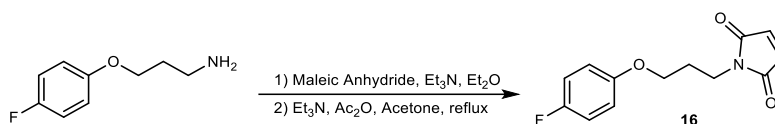

**1-(3-(4-fluorophenoxy)propyl)-1H-pyrrole-2,5-dione (16).** 3-(4-fluorophenoxy)propylamine (340 mg, 2.0 mmol, 1.0 equiv.) was dissolved in ether (10 mL) and cooled to 0°C. Triethylamine (420  $\mu$ L, 2.4 mmol, 1.2 equiv.) and maleic anhydride (235 mg, 2.4 mmol, 1.2 equiv.) in ether solution (10 mL) were added, and the reaction was allowed to proceed at room temperature for 3 hours. The reaction mixture was filtered, and the filtrate was dissolved in acetone (10 mL). Triethylamine (420  $\mu$ L, 2.4 mmol, 1.2 equiv.) and acetic anhydride (283  $\mu$ L, 3.0 mmol, 1.5 equiv.) were added to the reaction mixture, and the reaction was stirred under reflux for 20 hours. The solvent was evaporated, and the residue was dissolved in ethyl acetate (30 mL). The solution was successively washed with saturated sodium bicarbonate, 1 M hydrochloric acid, and saturated saline solution, dried over anhydrous sodium sulfate, filtered, and the solvent was evaporated under reduced pressure. The product was purified by silica gel column chromatography (DCM: MeOH = 30:1) to yield the title compound as a white solid (365 mg, 52.8%).

**$^1H$  NMR** (400 MHz, Chloroform- $d$ )  $\delta$  7.01 – 6.90 (m, 2H), 6.84 – 6.75 (m, 2H), 6.70 (s, 2H), 3.93 (t,  $J$  = 6.0 Hz, 2H), 3.74 (t,  $J$  = 6.9 Hz, 2H), 2.14 – 1.99 (m, 2H).

**$^{13}C$  NMR** (100 MHz, Chloroform- $d$ )  $\delta$  170.76, 157.34 (d,  $J$  = 238.3 Hz), 154.83 (d,  $J$  = 2.2 Hz), 134.19, 115.90, 115.67, 115.58, 115.50, 66.17, 35.32, 28.29.

**$^{19}F$  NMR** (376 MHz, Chloroform- $d$ )  $\delta$  -123.88.

**HRMS** (ESI)  $m/z$ :  $[M+H]^+$  Calcd for  $C_{13}H_{13}FNO_3^+$ : 250.0874; Found: 250.0871.

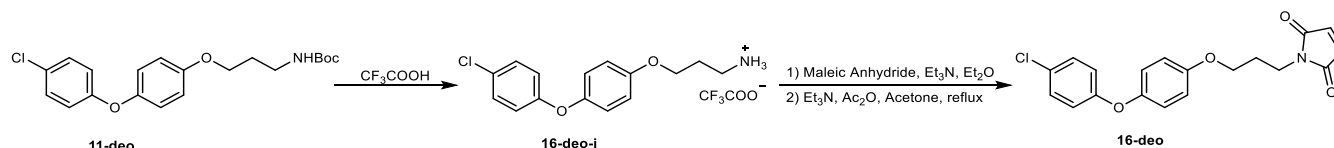

**1-(3-(4-(4-chlorophenoxy)phenoxy)propyl)-1H-pyrrole-2,5-dione (16-deo).** To a solution of compound **11-deo** (300 mg, 0.79 mmol, 1.0 equiv.) in DCM (20 mL), TFA (5 mL) was added. The solution was stirred at room temperature for 5 h. The solvent and TFA were evaporated under reduced pressure. The residue was dissolved in ether (20 mL) and cooled to 0°C. Triethylamine (625  $\mu$ L, 3.57 mmol, 1.5 equiv.) and maleic anhydride (280 mg, 2.86 mmol, 1.2 equiv.) in ether solution (10 mL) were added, and the reaction was allowed to proceed at room temperature for 4 hours. The reaction mixture was filtered, and the filtrate was dissolved in acetone (10 mL). Triethylamine (420  $\mu$ L, 2.4 mmol, 1.2 equiv.) and acetic anhydride (283  $\mu$ L, 3.0 mmol, 1.5 equiv.) were added to the reaction mixture, and the reaction was stirred under reflux for 20 hours. The solvent was evaporated, and the residue was dissolved in ethyl acetate (30 mL). The solution was successively washed with saturated sodium bicarbonate, 1 M hydrochloric acid, and saturated saline solution, dried over anhydrous sodium sulfate, filtered, and the solvent was evaporated under reduced pressure. The product was purified by silica gel column chromatography (DCM : MeOH = 30:1)

to yield the title compound as a white solid (407 mg, 47.8%).

**<sup>1</sup>H NMR** (400 MHz, Chloroform-*d*)  $\delta$  7.28 – 7.20 (m, 2H), 6.96 – 6.90 (m, 2H), 6.89 – 6.81 (m, 4H), 6.71 (s, 2H), 3.96 (t, *J* = 6.0 Hz, 2H), 3.75 (t, *J* = 6.9 Hz, 2H), 2.13 – 2.05 (m, 2H).

**<sup>13</sup>C NMR** (100 MHz, Chloroform-*d*)  $\delta$  170.77, 157.14, 155.26, 149.97, 134.20, 129.55, 127.39, 120.77, 118.84, 115.68, 66.04, 35.36, 28.32.

**HRMS** (ESI) *m/z*: [M+Na]<sup>+</sup> Calcd for C<sub>19</sub>H<sub>16</sub>ClNO<sub>4</sub>Na<sup>+</sup>: 380.0660; Found: 380.0658.

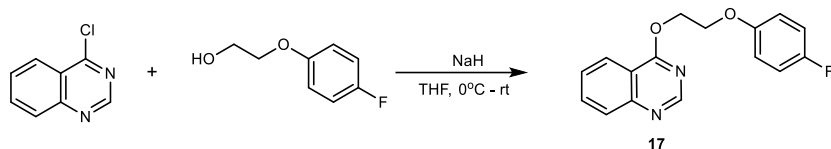

**4-(2-(4-fluorophenoxy)ethoxy)quinazoline (17).** A solution of 2-(4-Fluorophenoxy)ethanol (117 mg, 0.75 mmol, 1 equiv.) in dry THF (10 mL) was stirred at 0 °C for 15 min. Then, NaH (0.08g, 3 mmol, 4 equiv.) was added. The mixture was stirred at room temperature for 40 min. The mixture was cooled down to 0 °C, and 4-chloroquinazoline (123 mg, 0.75 mmol, 1 equiv.) in dry THF (5 mL) was added. The reaction was stirred at room temperature overnight. The reaction was quenched with saturated aqueous NH<sub>4</sub>Cl and extracted with EtOAc (3 × 15mL). The organic phase was washed with saturated brine, dried with Na<sub>2</sub>SO<sub>4</sub>, filtered, and concentrated in vacuo and purified by silica gel column with hexane/ethyl acetate (6:1) as the eluent to give the title compound as a white solid (130 mg, 61.0%).

**<sup>1</sup>H NMR** (400 MHz, Chloroform-*d*)  $\delta$  8.81 (s, 1H), 8.17 (d, *J* = 9.1 Hz, 1H), 7.94 (d, *J* = 8.4 Hz, 1H), 7.83 (t, *J* = 8.4 Hz, 1H), 7.55 (t, *J* = 8.1 Hz, 1H), 7.03 – 6.96 (m, 2H), 6.92 – 6.89 (m, 2H), 4.92 (t, *J* = 4.7 Hz, 2H), 4.40 (t, *J* = 4.7 Hz, 2H).

**<sup>13</sup>C NMR** (101 MHz, Chloroform-*d*)  $\delta$  166.59, 157.65 (d, *J* = 238.8 Hz), 154.87 (d, *J* = 2.1 Hz), 154.28, 151.19, 133.83, 127.84, 127.26, 123.71, 116.64, 116.07 (d, *J* = 17.3 Hz), 115.92 (d, *J* = 2.1 Hz), 66.86, 65.52.

**<sup>19</sup>F NMR** (376 MHz, Chloroform-*d*)  $\delta$  -123.30.

**HRMS (ESI):** Calculated for C<sub>16</sub>H<sub>14</sub>FN<sub>2</sub>O<sub>2</sub><sup>+</sup> [M+H]<sup>+</sup>: 285.1034; Found: 285.1033.

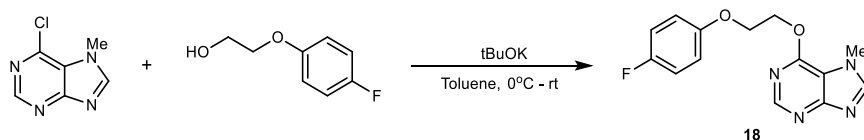

**6-(2-(4-fluorophenoxy)ethoxy)-7-methyl-7H-purine (18).** A mixture of potassium *tert*-butoxide (160 mg, 1.4 mmol, 2 equiv.) in toluene (6 mL) was treated with 2-(4-Fluorophenoxy)ethanol (109 mg, 0.7 mmol, 1 equiv.) dropwise at 0 °C. After 5 min, 6-chloro-7-methylpurine (118 mg, 0.7 mmol, 1 equiv.) was added to the mixture. The reaction mixture was stirred at room temperature for 5 h. The reaction was quenched with saturated aqueous NH<sub>4</sub>Cl and extracted with EtOAc (3 × 15mL). The organic phase was washed with saturated brine, dried with Na<sub>2</sub>SO<sub>4</sub>, filtered, and concentrated in vacuo, and purified by silica gel column with DCM/MeOH (40:1 to 15:1) as the eluent to give the title compound as a white solid (137 mg, 67.9 %).

**<sup>1</sup>H NMR** (400 MHz, Chloroform-*d*) δ 8.62 (s, 1H), 7.97 (s, 1H), 7.01 – 6.94 (m, 2H), 6.91 – 6.85 (m, 2H), 4.91 (t, *J* = 4.6 Hz, 3H), 4.37 (t, *J* = 4.6 Hz, 3H), 4.00 (s, 3H).

**<sup>13</sup>C NMR** (101 MHz, Chloroform-*d*) δ 161.99, 157.60 (d, *J* = 239.0 Hz), 156.88, 154.77 (d, *J* = 2.1 Hz), 152.13, 146.25, 116.06 (d, *J* = 23.2 Hz), 115.77 (d, *J* = 8.0 Hz), 113.62, 66.80, 65.25, 34.17.

**<sup>19</sup>F NMR** (376 MHz, Chloroform-*d*) δ -123.18.

**HRMS** (ESI) *m/z*: [M+H]<sup>+</sup> Calcd for C<sub>14</sub>H<sub>14</sub>FN<sub>4</sub>O<sub>2</sub><sup>+</sup>: 289.1095; Found: 289.1094.

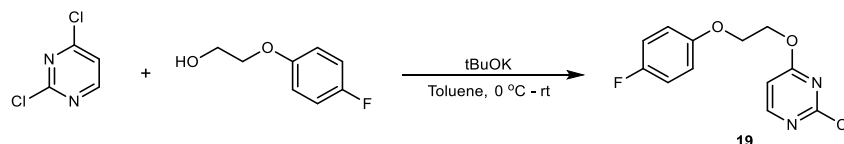

**2-chloro-4-(2-(4-fluorophenoxy)ethoxy)pyrimidine (19).** Following the same preparation procedure of compound **18**, the title compound was obtained as a yellow solid (0.063 g, 31.3 %) from 2-(4-Fluorophenoxy)ethanol (117 mg, 0.75 mmol, 1 equiv.) and 2,4-dichloropyrimidine (134 mg, 0.9 mmol, 1.2 equiv.).

**<sup>1</sup>H NMR** (400 MHz, Chloroform-*d*) δ 8.32 (d, *J* = 5.7 Hz, 1H), 7.03 – 6.95 (m, 2H), 6.91 – 6.85 (m, 2H), 6.73 (d, *J* = 5.7 Hz, 1H), 4.74 (t, *J* = 4.9 Hz, 3H), 4.28 (t, *J* = 4.7 Hz, 3H).

**<sup>13</sup>C NMR** (101 MHz, Chloroform-*d*) δ 170.20, 160.26, 159.16, 157.69 (d, *J* = 239.0 Hz), 154.62 (d, *J* = 2.1 Hz), 116.07 (d, *J* = 23.2 Hz), 115.84 (d, *J* = 8.0 Hz), 107.49, 66.48, 65.80.

**<sup>19</sup>F NMR** (376 MHz, Chloroform-*d*) δ -123.17.

**HRMS (ESI):** Calculated for C<sub>12</sub>H<sub>11</sub>ClFN<sub>2</sub>O<sub>2</sub><sup>+</sup> [M+H]<sup>+</sup>: 269.0488 Found: 269.0488.

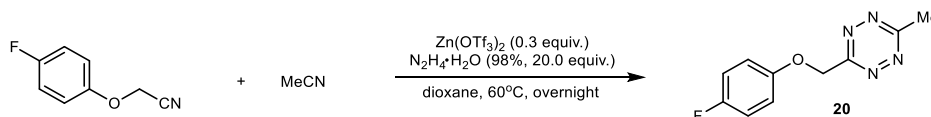

**3-((4-fluorophenoxy)methyl)-6-methyl-1,2,4,5-tetrazine (20).** The title compound was prepared according to the general procedure E from 2-(4-fluorophenoxy)acetonitrile (682 mg, 4.51 mmol, 1.0 equiv.) and MeCN (3.5 mL, 67.65 mmol, 15.0 equiv.). The title compound was obtained as a red solid (29.8 mg, 3%)

**<sup>1</sup>H NMR** (400 MHz, Chloroform-*d*) δ 6.93 (s, 2H), 6.92 – 6.88 (m, 2H), 5.54 (s, 2H), 3.03 (s, 3H)

**<sup>13</sup>C NMR** (101 MHz, Chloroform-*d*) δ 167.77, 164.49, 156.92 (d, *J* = 240.0 Hz), 153.00 (d, *J* = 2.3 Hz), 115.24 (d, *J* = 8.3 Hz), 67.49, 20.31.

**<sup>19</sup>F NMR** (376 MHz, Chloroform-*d*) δ -122.18.

**HRMS** (ESI) *m/z*: [M+H]<sup>+</sup> Calcd for C<sub>10</sub>H<sub>10</sub>FN<sub>4</sub>O<sup>+</sup>: 221.0833 ; Found: 221.0835.



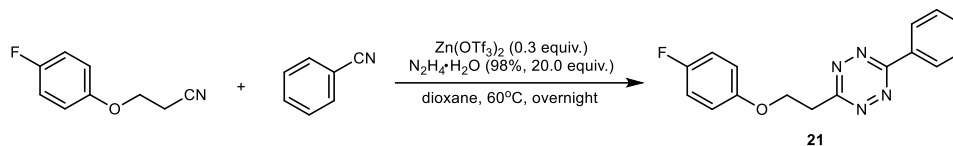

**3-(2-(4-fluorophenoxy)ethyl)-6-phenyl-1,2,4,5-tetrazine (21).** The title compound was prepared according to the general procedure **E** from compound 3-(4-fluorophenoxy)propanenitrile<sup>[3]</sup> (661 mg, 4.0 mmol, 1.0 equiv.) and benzonitrile (1.2 mL, 12.0 mmol, 3.0 equiv.). The compound **21** was obtained as a red solid (23.8 mg, 2%).

**<sup>1</sup>H NMR** (400 MHz, Chloroform-*d*)  $\delta$  8.57 – 8.49 (m, 2H), 7.53 (ddt,  $J$  = 11.1, 8.7, 4.8 Hz, 3H), 6.92 – 6.82 (m, 2H), 6.81 – 6.71 (m, 2H), 4.54 (t,  $J$  = 6.4 Hz, 2H), 3.75 (t,  $J$  = 6.3 Hz, 2H).

**<sup>13</sup>C NMR** (100 MHz, Chloroform-*d*)  $\delta$  166.38, 163.51, 156.49 (d,  $J$  = 238.8 Hz), 153.44 (d,  $J$  = 2.2 Hz), 131.75, 130.61, 128.26, 127.03, 114.90 (d,  $J$  = 12.4 Hz), 114.74 (d,  $J$  = 2.7 Hz), 64.83, 33.97.

**<sup>19</sup>F NMR** (376 MHz, Chloroform-*d*)  $\delta$  -123.25.

**HRMS (ESI)**  $m/z$ :  $[M+H]^+$  Calcd for C<sub>16</sub>H<sub>14</sub>FN<sub>4</sub>O<sup>+</sup>: 297.1146 ; Found: 297.1144.

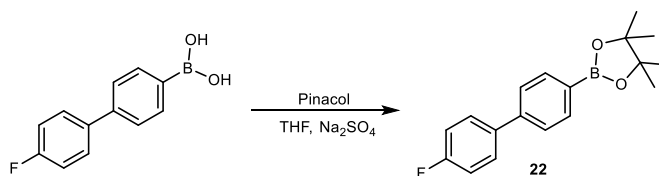

**2-(4'-fluoro-[1,1'-biphenyl]-4-yl)-4,4,5,5-tetramethyl-1,3,2-dioxaborolane (22).** To a solution of 4-(4-fluorophenyl)phenylboronic acid (200 mg, 1.0 equiv.) in 5 mL of anhydrous tetrahydrofuran was added pinacol (110 mg, 1.0 equiv.) add anhydrous sodium sulfate (238 mg, 1.8 equiv.). The mixture was stirred at room temperature overnight under nitrogen. After the reaction was completed, as monitored by the thin layer chromatography, the reaction was concentrated under reduced pressure and purified by silica gel column chromatography (petroleum ether: ethyl acetate = 8:1) to give the title compound as a white solid (149 mg, 53.7%).

**<sup>1</sup>H NMR** (400 MHz, Chloroform-*d*)  $\delta$  7.87 (d,  $J$  = 7.8 Hz, 2H), 7.59 – 7.52 (m, 4H), 7.12 (t,  $J$  = 8.6 Hz, 2H), 1.36 (s, 12H).

**<sup>13</sup>C NMR** (100 MHz, Chloroform-*d*)  $\delta$  162.66 (d,  $J$  = 246.7 Hz), 142.88, 137.14 (d,  $J$  = 3.2 Hz), 135.33, 128.81 (d,  $J$  = 8.0 Hz), 126.31, 115.66 (d,  $J$  = 21.4 Hz), 83.88, 24.90.

**<sup>19</sup>F NMR** (376 MHz, Chloroform-*d*)  $\delta$  -115.31.

**HRMS (ESI)**  $m/z$ :  $[M+H]^+$  Calcd for C<sub>18</sub>H<sub>21</sub>BFO<sub>2</sub><sup>+</sup>: 299.1613 ; Found: 299.1613 .

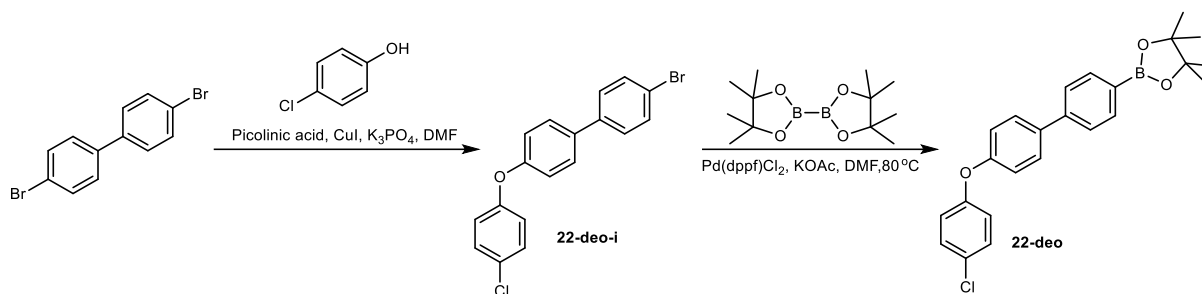

**4-bromo-4'-(4-chlorophenoxy)-1,1'-biphenyl (22-deo-i).** 4,4'-Dibromobiphenyl (1.0 g, 3.21 mmol, 1.0 equiv.), 4-chlorophenol (495 mg, 3.85 mmol, 1.2 equiv.), 2-formylpyridine (473 mg, 3.85 mmol, 1.2 equiv.), cuprous iodide (366 mg, 1.93 mmol, 0.5 equiv.), copper powder (197 mg, 3.08 mmol, 0.8 equiv.), and potassium phosphate (816 mg, 3.85 mmol, 1.2 equiv.) were dissolved in DMF (20 ml) under nitrogen protection. The reaction mixture was then heated at 100 °C overnight. After the reaction mixture was cooled to room temperature, water (20 ml) was added and extracted with ethyl acetate. The combined organic layers were washed with a saturated sodium chloride solution, dried over anhydrous sodium sulfate, filtered, and the solvent was evaporated under reduced pressure. The residue was purified by silica gel column chromatography (PE: EA = 10:1) to yield the title compound as a white solid (395 mg, 34.3%).

**<sup>1</sup>H NMR** (400 MHz, Chloroform-*d*) δ 7.60 – 7.48 (m, 4H), 7.46 – 7.39 (m, 2H), 7.35 – 7.28 (m, 2H), 7.09 – 7.03 (m, 2H), 7.02 – 6.93 (m, 2H).

**<sup>13</sup>C NMR** (100 MHz, Chloroform-*d*) δ 156.81, 155.68, 139.32, 135.42, 131.93, 129.83, 129.78, 128.83, 128.56, 128.50, 128.39, 127.16, 126.93, 121.39, 120.27, 120.17, 119.15, 119.12.

**2-(4'-(4-chlorophenoxy)-[1,1'-biphenyl]-4-yl)-4,4,5,5-tetramethyl-1,3,2-dioxaborolane (22-deo).** Compound 22-deo-i (100 mg, 0.28 mmol, 1.0 equiv.), boronic acid pinacol ester (269 mg, 1.12 mmol, 4.0 equiv.), Pd(dppf)Cl<sub>2</sub> (20 mg, 0.028 mmol, 0.1 equiv.) and potassium acetate (136 mg, 1.4 mmol, 5.0 equiv.) were dissolved in DMF (5 ml) under nitrogen protection. The reaction mixture was then heated at 100 °C overnight. After cooling the reaction to room temperature, water was added, and the mixture was extracted with ethyl acetate. The combined organic layers were washed with a saturated sodium chloride solution, dried over anhydrous sodium sulfate, filtered, and the solvent was evaporated under reduced pressure. The residue was purified by silica gel column chromatography (PE: EA = 15:1) to yield the title compound as a milky white solid (76 mg, 67.3%).

**<sup>1</sup>H NMR** (400 MHz, Chloroform-*d*) δ 7.90 – 7.85 (m, 2H), 7.61 – 7.56 (m, 4H), 7.34 – 7.27 (m, 2H), 7.08 – 7.04 (m, 2H), 7.01 – 6.95 (m, 2H), 1.36 (s, 12H).

**<sup>13</sup>C NMR** (100 MHz, Chloroform-*d*) δ 156.69, 155.83, 143.03, 136.49, 135.33, 129.79, 128.66, 128.41, 126.20, 120.18, 119.12, 83.86, 24.90.

**HRMS** (ESI) *m/z*: [M+H]<sup>+</sup> Calcd for C<sub>24</sub>H<sub>25</sub>BclO<sub>3</sub><sup>+</sup>: 407.1580 ; Found: 407.1576.

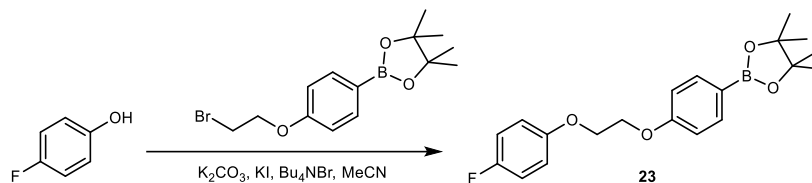

**2-(4-(2-(4-fluorophenoxy)ethoxy)phenyl)-4,4,5,5-tetramethyl-1,3,2-dioxaborolane (23).** The title compound was prepared according to the general procedure **C** from 4-fluorophenol (112 mg, 1.0 mmol, 1.0 equiv.) and 2-(4-(2-bromoethoxy)phenyl)-4,4,5,5-tetramethyl-1,3,2-dioxaborolane (392 mg, 1.2 mmol, 1.2 equiv.), and obtained as a white liquid (215 mg, 55.4%).

**<sup>1</sup>H NMR** (400 MHz, Chloroform-*d*)  $\delta$  7.79 – 7.72 (m, 2H), 7.02 – 6.91 (m, 4H), 6.91 – 6.85 (m, 2H), 4.37 – 4.23 (m, 4H), 1.33 (s, 12H).

**<sup>13</sup>C NMR** (100 MHz, Chloroform-*d*)  $\delta$  161.16, 157.50 (d,  $J$  = 238.6 Hz), 154.77 (d,  $J$  = 2.2 Hz), 136.57, 121.08, 115.98, 115.87, 115.79, 115.75, 113.99, 83.62, 67.22, 66.28, 24.88.

**<sup>19</sup>F NMR** (376 MHz, Chloroform-*d*)  $\delta$  -123.48.

**HRMS** (ESI)  $m/z$ : [M+Na]<sup>+</sup> Calcd for C<sub>20</sub>H<sub>24</sub>BFO<sub>4</sub>Na<sup>+</sup>: 381.1644; Found: 381.1642.

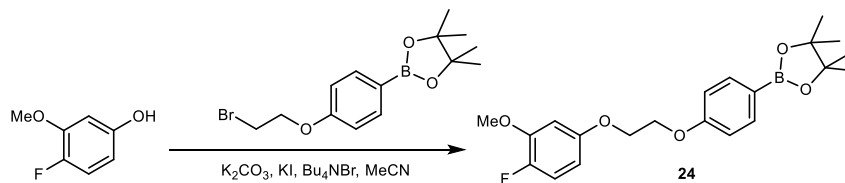

**2-(4-(2-(4-fluoro-3-methoxyphenoxy)ethoxy)phenyl)-4,4,5,5-tetramethyl-1,3,2-dioxaborolane (24).** The title compound was prepared according to the general procedure **C** from the 4-fluoro-3-methoxyphenol (71 mg, 0.5 mmol, 1.0 equiv.) and 2-(4-(2-bromoethoxy)phenyl)-4,4,5,5-tetramethyl-1,3,2-dioxaborolane (196 mg, 0.6 mmol, 1.2 equiv.), and obtained as a white liquid (113 mg, 58.5%).

**<sup>1</sup>H NMR** (400 MHz, Chloroform-*d*)  $\delta$  7.80 – 7.73 (m, 2H), 7.01 – 6.90 (m, 3H), 6.60 (dd,  $J$  = 7.2, 2.9 Hz, 1H), 6.41 (dt,  $J$  = 8.9, 3.1 Hz, 1H), 4.33 (dd,  $J$  = 6.2, 3.7 Hz, 2H), 4.28 (dd,  $J$  = 5.7, 3.4 Hz, 2H), 3.85 (s, 3H), 1.33 (s, 12H).

**<sup>13</sup>C NMR** (100 MHz, Chloroform-*d*)  $\delta$  161.12, 155.14 (d,  $J$  = 2.2 Hz), 148.18 (d,  $J$  = 12.0 Hz), 147.51 (d,  $J$  = 238.3 Hz), 136.62, 136.56, 121.43, 115.69 (d,  $J$  = 19.7 Hz), 113.98, 104.44 (d,  $J$  = 6.6 Hz), 102.12 (d,  $J$  = 1.7 Hz), 83.61, 67.13, 66.25, 56.18, 24.86.

**<sup>19</sup>F NMR** (376 MHz, Chloroform-*d*)  $\delta$  -145.00.

**HRMS** (ESI)  $m/z$ : [M+Na]<sup>+</sup> Calcd for C<sub>21</sub>H<sub>26</sub>BFO<sub>5</sub>Na<sup>+</sup>: 411.1750; Found: 411.1750.

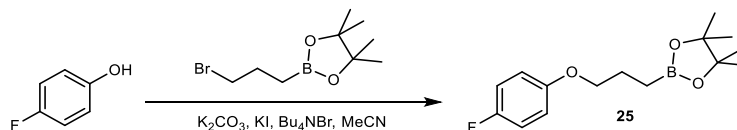

**2-(3-(4-fluorophenoxy)propyl)-4,4,5,5-tetramethyl-1,3,2-dioxaborolane (25).** The title compound was prepared according

to the general procedure **C** from 4-fluorophenol (112 mg, 1.0 mmol, 1.0 equiv.) and 2-(3-bromopropyl)-4,4,5,5-tetramethyl-1,3,2-dioxaborolane (298 mg, 1.2 mmol, 1.2 equiv.), and obtained as a colorless liquid (108 mg, 38.5%).

**<sup>1</sup>H NMR** (400 MHz, Chloroform-*d*)  $\delta$  6.99 – 6.90 (m, 2H), 6.87 – 6.77 (m, 2H), 3.89 (t, *J* = 6.7 Hz, 2H), 1.94 – 1.81 (m, 2H), 1.25 (s, 12H), 0.91 (t, *J* = 7.8 Hz, 2H).

**<sup>13</sup>C NMR** (100 MHz, Chloroform-*d*)  $\delta$  157.08 (d, *J* = 237.6 Hz), 155.30 (d, *J* = 2.1 Hz), 115.77, 115.56, 115.54, 115.48, 83.12, 70.29, 53.43, 24.84, 23.76.

**<sup>19</sup>F NMR** (376 MHz, Chloroform-*d*)  $\delta$  -124.61.

**HRMS** (ESI) *m/z*: [M+H]<sup>+</sup> Calcd for C<sub>15</sub>H<sub>23</sub>BF<sub>3</sub><sup>+</sup>: 281.1719; Found: 281.1723.

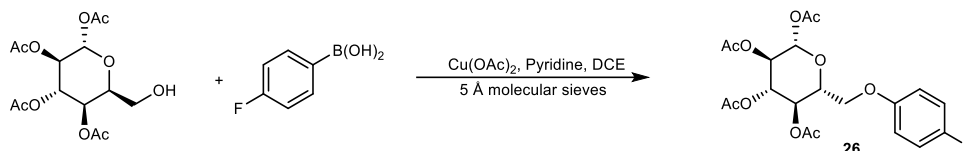

**(2S,3R,4S,5R,6R)-6-((4-fluorophenoxy)methyl)tetrahydro-2H-pyran-2,3,4,5-tetraol tetraacetate(26)**. The title compound was prepared according to the general procedure **F** from (2S,3R,4S,5R,6R)-6-(hydroxymethyl)tetrahydro-2H-pyran-2,3,4,5-tetraol tetraacetate (157 mg, 0.45 mmol, 1 equiv.) and (4-fluorophenyl)boronic acid (126 mg, 0.90 mmol, 2 equiv.), and obtained as a white solid (36 mg, 19.0%).

**<sup>1</sup>H NMR** (400 MHz, Chloroform-*d*)  $\delta$  6.99 – 6.91 (m, 2H), 6.86 – 6.79 (m, 2H), 5.76 (d, *J* = 8.2 Hz, 1H), 5.33 – 5.25 (m, 2H), 5.21 – 5.13 (m, 1H), 4.12 – 4.05 (m, 1H), 4.00 – 3.93 (m, 2H), 2.11 (s, 3H), 2.04 (s, 3H), 2.03 (s, 3H), 2.01 (s, 3H).

**<sup>13</sup>C NMR** (100 MHz, Chloroform-*d*)  $\delta$  170.18, 169.39, 169.26, 169.02, 157.66 (d, *J* = 239.1 Hz), 154.42 (d, *J* = 2.2 Hz), 116.00 (d, *J* = 3.2 Hz), 115.84 (d, *J* = 18.3 Hz), 91.76, 73.23, 72.87, 70.31, 68.58, 67.25, 20.82, 20.61, 20.58.

**<sup>19</sup>F NMR** (376 MHz, Chloroform-*d*)  $\delta$  -123.01.

**HRMS** (ESI) *m/z*: [M+Na]<sup>+</sup> Calcd for C<sub>20</sub>H<sub>23</sub>FO<sub>10</sub>Na<sup>+</sup>: 465.1167; Found: 465.1164.

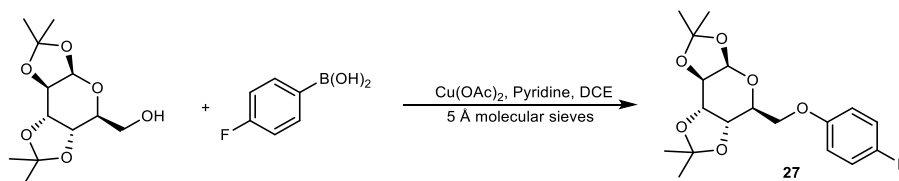

**(3aR,5S,5aS,8aS,8bR)-5-((4-fluorophenoxy)methyl)-2,2,7,7-tetramethyltetrahydro-5H-bis([1,3]dioxolo)[4,5-b:4',5'-d]pyran(27)**. The title compound was prepared according to the general procedure **F** from ((3aR,5S,5aS,8aS,8bR)-2,2,7,7-tetramethyltetrahydro-5H-bis([1,3]dioxolo)[4,5-b:4',5'-d]pyran-5-yl)methanol (117 mg, 0.45 mmol) and (4-fluorophenyl)boronic acid (126 mg, 0.90 mmol), and obtained as a white solid (43 mg, 24.1%).

**<sup>1</sup>H NMR** (400 MHz, Chloroform-*d*)  $\delta$  7.00 – 6.92 (m, 2H), 6.92 – 6.84 (m, 2H), 5.57 (d, *J* = 5.0 Hz, 1H), 4.65 (dd, *J* = 7.9, 2.5 Hz, 1H), 4.39 – 4.30 (m, 2H), 4.21 – 4.01 (m, 3H), 1.51 (s, 3H), 1.47 (s, 3H), 1.36 (s, 3H), 1.34 (s, 3H).

**<sup>13</sup>C NMR** (100 MHz, Chloroform-*d*)  $\delta$  157.41 (d, *J* = 238.2 Hz), 154.72 (d, *J* = 2.1 Hz), 115.92 (d, *J* = 8.0 Hz), 115.72 (d, *J* = 23.0 Hz), 109.49, 108.75, 96.39, 70.99, 70.65, 70.60, 67.37, 66.17, 26.03, 26.00, 24.95, 24.46.

**<sup>19</sup>F NMR** (376 MHz, Chloroform-*d*)  $\delta$  -123.83.

**HRMS** (ESI) *m/z*: [M+Na]<sup>+</sup> Calcd for C<sub>18</sub>H<sub>23</sub>FO<sub>6</sub>Na<sup>+</sup>: 377.1371; Found: 377.1366.

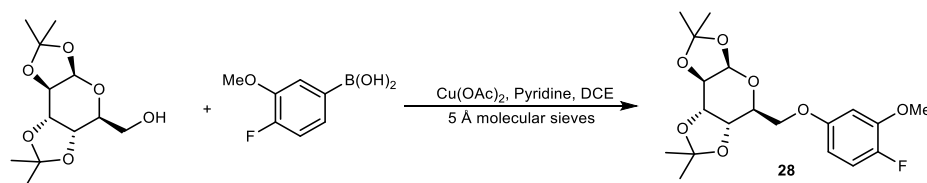

**(3aR,5S,5aS,8aS,8bR)-5-((4-fluoro-3-methoxyphenoxy)methyl)-2,2,7,7-tetramethyltetrahydro-5H-**

**bis([1,3]dioxolo)[4,5-b:4',5'-d]pyran (28).** The title compound was prepared according to the general procedure **F** from ((3aR,5S,5aS,8aS,8bR)-2,2,7,7-tetramethyltetrahydro-5H-bis([1,3]dioxolo)[4,5-b:4',5'-d]pyran-5-yl)methanol (117 mg, 0.45 mmol) and (4-fluoro-3-methoxyphenyl)boronic acid (153 mg, 0.90 mmol), and obtained as a white solid (52 mg, 27.2%)

**<sup>1</sup>H NMR** (400 MHz, Chloroform-*d*)  $\delta$  6.95 (dd, *J* = 11.1, 8.9 Hz, 1H), 6.61 (dd, *J* = 7.2, 2.9 Hz, 1H), 6.41 (dt, *J* = 8.9, 3.1 Hz, 1H), 5.58 (d, *J* = 5.0 Hz, 1H), 4.65 (dd, *J* = 7.9, 2.4 Hz, 1H), 4.40 – 4.30 (m, 2H), 4.19 – 4.02 (m, 3H), 3.86 (s, 3H), 1.52 (s, 3H), 1.47 (s, 3H), 1.36 (s, 3H), 1.35 (s, 3H).

**<sup>13</sup>C NMR** (100 MHz, Chloroform-*d*)  $\delta$  155.11, 155.09, 148.06 (d, *J* = 12.0 Hz), 147.39 (d, *J* = 237.9 Hz), 115.60 (d, *J* = 19.6 Hz), 109.51, 108.76, 104.68 (d, *J* = 6.6 Hz), 102.12 (d, *J* = 1.7 Hz), 96.41, 71.02, 70.66, 70.57, 67.31, 66.21, 56.17, 26.04, 26.00, 24.94, 24.47.

**<sup>19</sup>F NMR** (376 MHz, Chloroform-*d*)  $\delta$  -145.39.

**HRMS** (ESI) *m/z*: [M+H]<sup>+</sup> Calcd for C<sub>19</sub>H<sub>26</sub>FO<sub>7</sub><sup>+</sup>: 385.1657; Found: 385.1652.

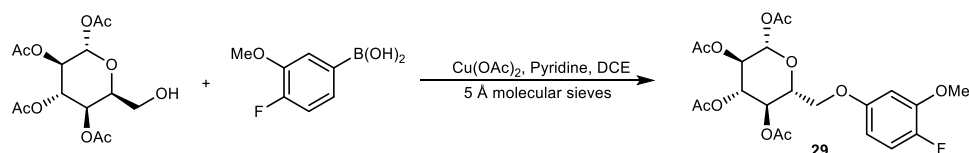

**(2S,3R,4S,5R,6R)-6-((4-fluoro-3-methoxyphenoxy)methyl)tetrahydro-2H-pyran-2,3,4,5-tetraol tetraacetate(29).** The title compound was prepared according to the general procedure **F** from (2S,3R,4S,5R,6S)-6-(hydroxymethyl)tetrahydro-2H-pyran-2,3,4,5-tetraol tetraacetate (157 mg, 0.45 mmol) and (4-fluoro-3-methoxyphenyl)boronic acid (153 mg, 0.90 mmol), and obtained as a white solid (29 mg, 21.3%).

**<sup>1</sup>H NMR** (400 MHz, Chloroform-*d*)  $\delta$  6.94 (dd, *J* = 11.0, 8.9 Hz, 1H), 6.56 (dd, *J* = 7.2, 2.9 Hz, 1H), 6.31 (dt, *J* = 8.9, 3.1 Hz, 1H), 5.76 (d, *J* = 8.2 Hz, 1H), 5.37 – 5.24 (m, 2H), 5.23 – 5.11 (m, 1H), 4.12 – 4.04 (m, 1H), 4.01 – 3.91 (m, 2H), 3.86 (s, 3H), 2.11 (s, 3H), 2.05 (s, 3H), 2.03 (s, 3H), 2.01 (s, 3H).

**<sup>13</sup>C NMR** (100 MHz, Chloroform-*d*)  $\delta$  170.17, 169.39, 169.26, 169.02, 154.82 (d, *J* = 2.3 Hz), 148.18 (d, *J* = 12.1 Hz), 147.69 (d, *J* = 238.8 Hz), 115.63 (d, *J* = 19.8 Hz), 104.52 (d, *J* = 6.7 Hz), 102.34 (d, *J* = 1.6 Hz), 91.77, 73.23, 72.89, 70.27, 68.46, 67.07, 56.19, 20.82, 20.63, 20.60, 20.57.

**<sup>19</sup>F NMR** (376 MHz, Chloroform-*d*)  $\delta$  -144.53.

**HRMS** (ESI) *m/z*: [M+Na]<sup>+</sup> Calcd for C<sub>21</sub>H<sub>25</sub>FO<sub>11</sub>Na<sup>+</sup>: 495.1273; Found: 495.1272.

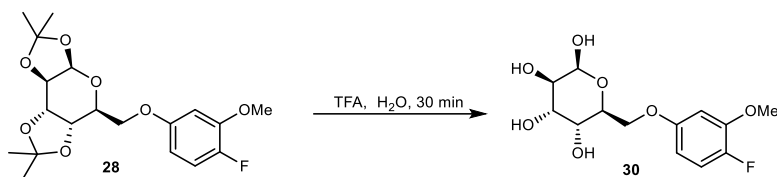

**(2S,3R,4S,5R,6S)-6-((4-fluoro-3-methoxyphenoxy)methyl)tetrahydro-2H-pyran-2,3,4,5-tetraol(30)**. The compound **28** (30 mg, 0.05 mmol) was dissolved in 1 mL 80% TFA. The solution was stirred under room temperature for 30 min. The reaction was condensed under reduced pressure and co-evaporated with water and ethyl acetate three times to give the title compound as a white solid (16 mg, 84%).

**<sup>1</sup>H NMR** (400 MHz, Chloroform-*d*)  $\delta$  6.96 (ddd, *J* = 10.4, 8.8, 1.4 Hz, 1H), 6.67 (dt, *J* = 7.2, 2.1 Hz, 1H), 6.49 – 6.39 (m, 1H), 4.53 – 4.43 (m, 1H), 4.20 – 4.06 (m, 2H), 3.95 – 3.92 (m, 1H), 3.89 – 3.76 (m, 4H), 3.54 – 3.47 (m, 2H).

**<sup>13</sup>C NMR** (100 MHz, Methanol-*d*<sub>4</sub>)  $\delta$  155.46 (d, *J* = 2.3 Hz), 148.15 (d, *J* = 12.0 Hz), 147.26 (d, *J* = 237.1 Hz), 115.19 (d, *J* = 19.8 Hz), 104.63 (d, *J* = 6.5 Hz), 101.46, 97.43, 73.52, 73.20, 72.33, 69.03, 67.68, 55.25.

**<sup>19</sup>F NMR** (376 MHz, Methanol-*d*<sub>4</sub>)  $\delta$  -147.34.

**HRMS** (ESI) *m/z*: [M+Na]<sup>+</sup> Calcd for C<sub>13</sub>H<sub>17</sub>FO<sub>7</sub>Na<sup>+</sup>: 327.0851; Found: 327.0848.

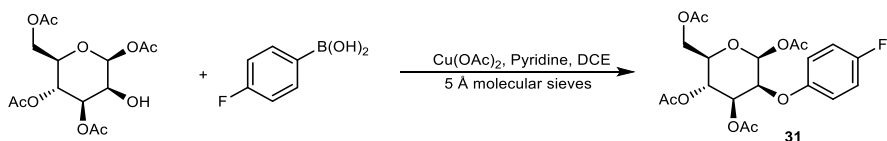

**(2S,3S,4S,5R,6R)-6-(acetoxymethyl)-3-(4-fluorophenoxy)tetrahydro-2H-pyran-2,4,5-triyl triacetate (31)**. The title compound was prepared according to the general procedure **F** from (2S,3S,4R,5R,6R)-6-(acetoxymethyl)-3-hydroxytetrahydro-2H-pyran-2,4,5-triyl triacetate (157 mg, 0.45 mmol) and (4-fluorophenyl)boronic acid (126 mg, 0.90 mmol), and obtained as a white solid (29 mg, 14.9%).

**<sup>1</sup>H NMR** (400 MHz, Chloroform-*d*)  $\delta$  7.01 – 6.90 (m, 4H), 5.87 (d, *J* = 1.2 Hz, 1H), 5.54 (t, *J* = 9.9 Hz, 1H), 5.06 (dd, *J* = 10.0, 3.1 Hz, 1H), 4.72 (dd, *J* = 3.1, 1.1 Hz, 1H), 4.34 (dd, *J* = 12.4, 5.3 Hz, 1H), 4.20 (dd, *J* = 12.4, 2.4 Hz, 1H), 3.83 (ddd, *J* = 9.9, 5.3, 2.4 Hz, 1H), 2.11 (s, 3H), 2.07 (s, 3H), 2.06 (s, 3H), 1.88 (s, 3H).

**<sup>13</sup>C NMR** (100 MHz, Chloroform-*d*)  $\delta$  170.77, 170.27, 169.50, 168.66, 158.12 (d, *J* = 240.8 Hz), 155.52 (d, *J* = 2.5 Hz), 118.86 (d, *J* = 8.3 Hz), 115.87 (d, *J* = 23.2 Hz), 91.71, 76.23, 73.37, 72.72, 65.47, 62.15, 20.80, 20.77, 20.71, 20.48.

**<sup>19</sup>F NMR** (376 MHz, Chloroform-*d*)  $\delta$  -121.19.

**HRMS** (ESI) *m/z*: [M+Na]<sup>+</sup> Calcd for C<sub>20</sub>H<sub>23</sub>FO<sub>10</sub>Na<sup>+</sup>: 465.1167; Found: 465.1164.

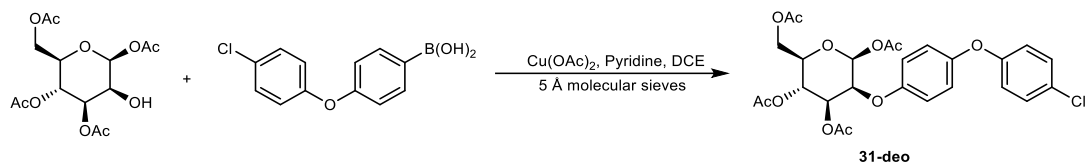

(2S,3S,4S,5R,6R)-6-(acetoxymethyl)-3-(4-(4-chlorophenoxy)phenoxy)tetrahydro-2H-pyran-2,4,5-triyl triacetate (**31-deo**). The title compound was prepared according to the general procedure **F** from (2S,3S,4R,5R,6R)-6-(acetoxymethyl)-3-hydroxytetrahydro-2H-pyran-2,4,5-triyl triacetate (157 mg, 0.45 mmol) and (4-(4-chlorophenoxy)phenyl)boronic acid (223 mg, 0.90 mmol), and obtained as a white solid (55 mg, 22.2%).

**<sup>1</sup>H NMR** (400 MHz, Chloroform-*d*)  $\delta$  7.29 – 7.23 (m, 2H), 7.02 – 6.97 (m, 2H), 6.95 – 6.90 (m, 2H), 6.89 – 6.84 (m, 2H), 5.89 (d, *J* = 1.1 Hz, 1H), 5.55 (t, *J* = 9.9 Hz, 1H), 5.08 (dd, *J* = 10.0, 3.1 Hz, 1H), 4.77 – 4.72 (m, 1H), 4.35 (dd, *J* = 12.4, 5.3 Hz, 1H), 4.21 (dd, *J* = 12.4, 2.4 Hz, 1H), 3.84 (ddd, *J* = 9.9, 5.2, 2.4 Hz, 1H), 2.12 (s, 3H), 2.07 (s, 6H), 1.90 (s, 3H).

**<sup>13</sup>C NMR** (100 MHz, Chloroform-*d*)  $\delta$  170.80, 170.28, 169.52, 168.68, 156.59, 155.72, 151.45, 129.68, 127.88, 120.32, 119.22, 118.91, 91.73, 76.09, 73.39, 72.72, 65.53, 62.18, 20.82, 20.72, 20.56.

**HRMS (ESI)**: Calculated for C<sub>26</sub>H<sub>27</sub>ClO<sub>11</sub>Na<sup>+</sup> [M+Na]<sup>+</sup>: 573.1134 Found: 573.1129.

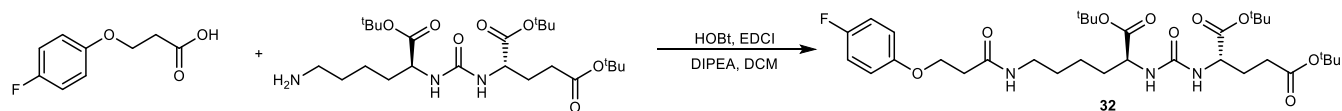

di-tert-butyl (((S)-1-(tert-butoxy)-6-(3-(4-fluorophenoxy)propanamido)-1-oxohexan-2-yl)carbamoyl)-L-glutamate (**32**).

The 3-(4-fluorophenoxy)propanoic acid (32 mg, 0.17 mmol, 1.0 equiv.), EDCI (36 mg, 0.19 mmol, 1.1 equiv.) and HOBT (26 mg, 0.19 mmol, 1.1 equiv.) were dissolved in DCM (3 mL). The solution was stirred at room temperature for 0.5h, followed by the addition of DIPEA (92  $\mu$ l, 0.51 mmol, 3.0 equiv.) and di-tert-butyl (((S)-6-amino-1-(tert-butoxy)-1-oxohexan-2-yl)carbamoyl)-L-glutamate (94 mg, 0.19 mmol, 1.1 equiv.). The reaction was stirred overnight. The solution was then washed with 1M citric acid aqueous solution, saturated NaHCO<sub>3</sub> solution, water, and saturated NaCl solution, dried over anhydrous sodium sulfate, filtered, and evaporated under reduced pressure. The residue was purified by silica gel column chromatography (DCM : MeOH = 25 : 1) to yield the title compound as a light-yellow oil (106 mg, 93.3%).

**<sup>1</sup>H NMR** (400 MHz, Chloroform-*d*)  $\delta$  7.02 – 6.91 (m, 2H), 6.91 – 6.80 (m, 2H), 6.74 – 6.67 (m, 1H), 5.56 (q, *J* = 7.9 Hz, 1H), 5.44 – 5.33 (m, 1H), 4.32 (td, *J* = 8.4, 4.8 Hz, 1H), 4.26 – 4.21 (m, 3H), 3.34 – 3.18 (m, 2H), 2.68 (t, *J* = 6.3 Hz, 2H), 2.40 – 2.20 (m, 2H), 2.10 – 2.02 (m, 1H), 1.89 – 1.70 (m, 2H), 1.60 – 1.50 (m, 3H), 1.49 – 1.39 (m, 27H), 1.36 – 1.28 (m, 2H).

**<sup>13</sup>C NMR** (100 MHz, Chloroform-*d*)  $\delta$  173.17 (d, *J* = 4.9 Hz), 172.42, 172.27, 170.61, 157.38 (d, *J* = 238.5 Hz), 157.25 (d, *J* = 2.1 Hz), 154.69 (d, *J* = 2.2 Hz), 115.85 (d, *J* = 13.7 Hz), 115.70 (d, *J* = 1.3 Hz), 82.38, 81.64 (d, *J* = 1.4 Hz), 80.62, 65.08, 53.46 (d, *J* = 1.7 Hz), 53.08, 39.04, 36.50, 32.40, 31.62, 28.81, 28.14, 28.06, 28.01, 22.73 (d, *J* = 3.1 Hz).

**<sup>19</sup>F NMR** (376 MHz, Chloroform-*d*)  $\delta$  -123.69.

**HRMS (ESI)** *m/z*: [M+H]<sup>+</sup> Calcd for C<sub>33</sub>H<sub>53</sub>FN<sub>3</sub>O<sub>9</sub><sup>+</sup>: 654.3760; Found: 654.3755.

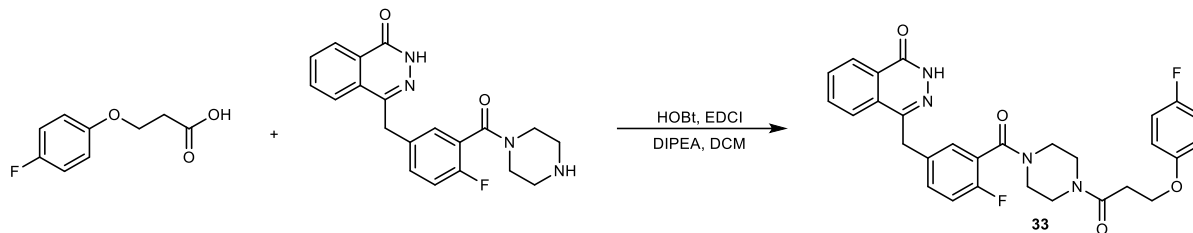

**4-(4-fluoro-3-(4-(3-(4-fluorophenoxy)propanoyl)piperazine-1-carbonyl)benzyl)-20-oxo-1,2,3,4-tetrahydro-1H-benzodiazepine (33).** Following the preparation procedure of compound **32**, the title compound was obtained from 3-(4-fluorophenoxy)propanoic acid (92 mg, 0.50 mmol, 1.0 equiv.) and 4-(4-fluoro-3-(piperazine-1-carbonyl)benzyl)-20-oxo-1,2,3,4-tetrahydro-1H-benzodiazepine (202 mg, 0.55 mmol, 1.1 equiv.) as a white solid (212 mg, 79.6%).

**<sup>1</sup>H NMR** (400 MHz, Chloroform-*d*)  $\delta$  11.31 (d,  $J$  = 33.6 Hz, 1H), 8.50 – 8.47 (m, 1H), 7.88 – 7.64 (m, 3H), 7.39 – 7.32 (m, 2H), 7.05 (t,  $J$  = 9.0 Hz, 1H), 6.98 – 6.92 (m, 2H), 6.89 – 6.77 (m, 2H), 4.36 – 4.22 (m, 4H), 3.93 – 3.44 (m, 6H), 3.42 – 3.27 (m, 2H), 2.82 (dt,  $J$  = 29.7, 6.4 Hz, 2H).

**<sup>13</sup>C NMR** (100 MHz, Chloroform-*d*)  $\delta$  169.17 (d,  $J$  = 19.6 Hz), 165.16 (d,  $J$  = 23.5 Hz), 160.78 (d,  $J$  = 4.4 Hz), 157.39 (d,  $J$  = 238.6 Hz), 157.01 (d,  $J$  = 247.4 Hz), 154.59 (d,  $J$  = 2.1 Hz), 145.50, 134.49 (d,  $J$  = 3.4 Hz), 133.69 (d,  $J$  = 3.3 Hz), 131.80 (d,  $J$  = 8.1 Hz), 131.64, 129.55, 129.30 (m), 128.31, 127.20, 125.00, 123.61 (dd,  $J$  = 17.8, 9.5 Hz), 116.00 (2C), 115.77 (2C), 115.51 (dd,  $J$  = 8.2, 2.7 Hz), 64.89 (d,  $J$  = 4.3 Hz), 46.94 (d,  $J$  = 32.9 Hz), 45.65 (d,  $J$  = 45.5 Hz), 42.11 (d,  $J$  = 29.7 Hz), 41.58 (d,  $J$  = 49.8 Hz), 37.68 (d,  $J$  = 6.2 Hz), 33.01.

**<sup>19</sup>F NMR** (376 MHz, Chloroform-*d*)  $\delta$  -117.66 (d,  $J$  = 18.4 Hz), -123.52 (d,  $J$  = 24.0 Hz).

**HRMS** (ESI)  $m/z$ :  $[M+H]^+$  Calcd for  $C_{29}H_{27}F_2N_4O_4^+$ : 533.1995; Found: 533.1998.

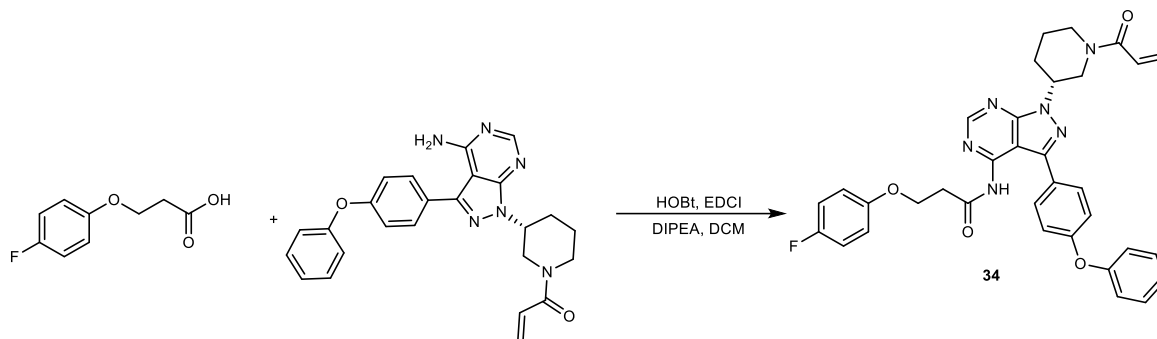

**©-N-(1-(1-acryloylpiperidin-3-yl)-3-(4-phenoxyphenyl)-1H-pyrazolo[3,4-d]pyrimidin-4-yl)-3-(4-fluorophenoxy)propenamide (34).** Following the preparation procedure of compound **32**, the title compound was obtained from 3-(4-fluorophenoxy)propanoic acid (92 mg, 0.50 mmol, 1.0 equiv.) and Ibrutinib (243 mg, 0.55 mmol, 1.1 equiv.) as a white solid (76 mg, 25.1%).

**<sup>1</sup>H NMR** (400 MHz, DMSO-*d*<sub>6</sub>)  $\delta$  11.06 (s, 1H), 8.83 (s, 1H), 7.66 (d,  $J$  = 8.1 Hz, 2H), 7.44 – 7.32 (m, 2H), 7.18 – 7.05 (m, 5H), 7.03 – 6.96 (m, 2H), 6.93 – 6.71 (m, 3H), 6.12 (dd,  $J$  = 23.6, 16.6 Hz, 1H), 5.66 (dd,  $J$  = 48.8, 10.5 Hz, 1H), 4.96 – 4.80 (m, 1H), 4.67 – 4.59 (m, 0.5H), 4.40 – 4.17 (m, 1H), 4.11 – 4.08 (m, 0.5H), 3.96 (t,  $J$  = 6.4 Hz, 2H), 3.76 (t,  $J$  = 11.7 Hz, 0.5H),



3.28 – 3.20 (m, 1H), 3.04 (d,  $J = 9.7$  Hz, 0.5H), 2.78 (t,  $J = 6.4$  Hz, 2H), 2.33 (d,  $J = 11.9$  Hz, 1H), 2.25 – 2.13 (m, 1H), 1.95 (d,  $J = 13.4$  Hz, 1H), 1.70 – 1.55 (m, 1H).

$^{13}\text{C}$  NMR (100 MHz, DMSO- $d_6$ )  $\delta$  168.91, 164.04, 156.13, 155.96, 155.94 (d,  $J = 236.0$  Hz), 154.11, 154.05, 153.96 (d,  $J = 1.9$  Hz), 152.23, 144.16 (d,  $J = 10.7$  Hz), 129.48, 128.76, 128.47, 127.68 (d,  $J = 10.7$  Hz), 126.88 (d,  $J = 18.2$  Hz), 123.00, 117.93 (d,  $J = 5.3$  Hz), 115.21 (d,  $J = 22.5$  Hz), 115.06 (d,  $J = 7.7$  Hz), 103.80, 62.97, 52.20 (d,  $J = 69.2$  Hz), 46.82 (d,  $J = 351.8$  Hz), 42.77 (d,  $J = 360.6$  Hz), 34.93, 28.89 (d,  $J = 10.5$  Hz), 23.51 (d,  $J = 157.3$  Hz).

$^{19}\text{F}$  NMR (376 MHz, DMSO- $d_6$ )  $\delta$  -123.81.

HRMS (ESI)  $m/z$ :  $[\text{M}+\text{H}]^+$  Calcd for  $\text{C}_{34}\text{H}_{32}\text{FN}_6\text{O}_4^+$ : 607.2464; Found: 607.2464.

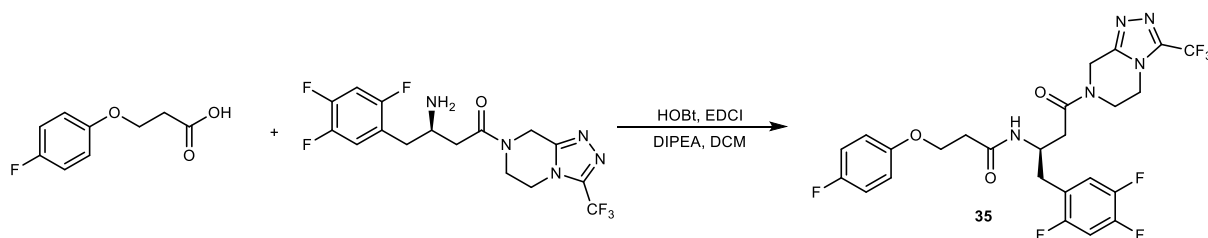

**©-3-(4-fluorophenoxy)-N-(4-oxo-4-(3-(trifluoromethyl)-5,6-dihydro-[1,2,4]triazolo[4,3-a]pyrazin-7(8H)-yl)-1-(2,4,5-trifluorophenyl)butan-2-yl)propenamide (35).** Following the preparation procedure of compound **32**, the title compound was obtained from 3-(4-fluorophenoxy)propanoic acid (92 mg, 0.50 mmol, 1.0 equiv.) and Sitagliptin (75 mg, 0.55 mmol, 1.1 equiv.) as a white solid (146 mg, 51.2%).

$^1\text{H}$  NMR (400 MHz, DMSO- $d_6$ )  $\delta$  7.98 (dd,  $J = 8.7, 5.4$  Hz, 1H), 7.50 – 7.30 (m, 2H), 7.08 (td,  $J = 8.8, 1.9$  Hz, 2H), 6.84 (ddd,  $J = 9.2, 4.4, 1.6$  Hz, 2H), 5.07 – 4.91 (m, 1H), 4.90 – 4.79 (m, 1H), 4.34 – 4.30 (m, 1H), 4.29 – 4.20 (m, 1H), 4.08 – 3.87 (m, 5H), 2.92 – 2.87 (m, 1H), 2.81 – 2.60 (m, 3H), 2.39 (dt,  $J = 22.5, 6.2$  Hz, 2H).

$^{13}\text{C}$  NMR (100 MHz, DMSO- $d_6$ )  $\delta$  169.69 (d,  $J = 10.4$  Hz), 169.51, 157.54 (d,  $J = 8$  Hz), 156.94 (d,  $J = 235.8$  Hz), 155.14 (d,  $J = 1.9$  Hz), 151.37 (d,  $J = 13.1$  Hz), 147.16 (dd,  $J = 22.3, 13.1$  Hz), 146.40 (m), 142.87 (dd,  $J = 38.9, 18.5$  Hz), 122.97, 119.53 (dd,  $J = 19.2, 6.2$  Hz), 118.92 (d,  $J = 269.9$  Hz), 116.20 (d,  $J = 20.5$  Hz), 116.04 (d,  $J = 5.8$  Hz), 105.93 (dd,  $J = 29.3, 20.9$  Hz), 64.98 (d,  $J = 7.5$  Hz), 46.47, 43.70 (d,  $J = 63.4$  Hz), 42.04 (d,  $J = 90.0$  Hz), 38.60 (d,  $J = 43.1$  Hz), 37.82 (d,  $J = 14.5$  Hz), 35.83 (d,  $J = 8.7$  Hz), 32.77 (d,  $J = 12.4$  Hz). *Note:* The spectrum data was not perfectly assigned due to too many C-F couplings in the compound.

$^{19}\text{F}$  NMR (376 MHz, DMSO- $d_6$ )  $\delta$  -61.92 (d,  $J = 18.6$  Hz), -118.52 (td,  $J = 14.5, 13.4, 3.5$  Hz), -124.04 (d,  $J = 3.1$  Hz), -137.37 (ddd,  $J = 22.3, 18.0, 3.3$  Hz), -144.07 (dt,  $J = 22.9, 16.5$  Hz).

HRMS (ESI)  $m/z$ :  $[\text{M}+\text{H}]^+$  Calcd for  $\text{C}_{25}\text{H}_{23}\text{F}_7\text{N}_5\text{O}_3^+$ : 574.1684; Found: 574.1682.

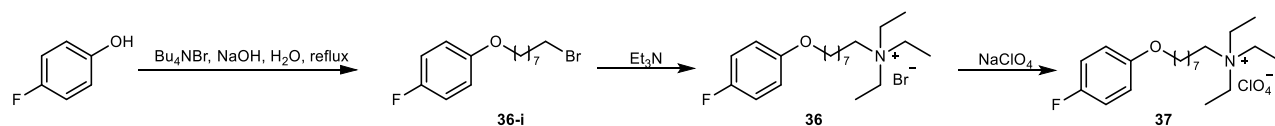

**1-((8-bromooctyl)oxy)-4-fluorobenzene (36-i).** The title compound was prepared according to the general procedure A from 4-chlorophenol (1.0g, 8.92 mmol, 1.0 equiv. ) and 1,8-dibromo octane (6.6 ml, 35.7 mmol, 4 equiv.), and obtained as a colourless oil (1.6 g, 59.2 %).

**<sup>1</sup>H NMR** (400 MHz, Chloroform-*d*)  $\delta$  6.99 – 6.92 (m, 2H), 6.85 – 6.79 (m, 2H), 3.90 (t, *J* = 6.5 Hz, 2H), 3.41 (t, *J* = 6.8 Hz, 2H), 1.90 – 1.82 (m, 2H), 1.81 – 1.71 (m, 2H), 1.50 – 1.31 (m, 8H).

**<sup>13</sup>C NMR** (101 MHz, Chloroform-*d*)  $\delta$  157.25 (d, *J* = 237.8 Hz), 155.35 (d, *J* = 2.0 Hz), 115.84 (d, *J* = 23.0 Hz), 115.52 (d, *J* = 7.9 Hz), 68.67, 34.10, 32.91, 29.37, 29.31, 28.81, 28.22, 26.07.

**<sup>19</sup>F NMR** (376 MHz, Chloroform-*d*)  $\delta$  -124.43.

**N,N,N-triethyl-8-(4-fluorophenoxy)octan-1-aminium bromide (36).** The solution of **36-©** (152 mg, 0.5 mmol) and triethylamine (0.5mL) in MeCN (2 ml) was stirred under 80 °C overnight. The reaction was cooled to room temperature, and then the solvent was evaporated under vacuum. The residue was washed three times with ether to obtain the title compound as a white solid (168 mg, 83%).

**<sup>1</sup>H NMR** (400 MHz, Chloroform-*d*)  $\delta$  6.96 (t, *J* = 8.7 Hz, 2H), 6.85 – 6.80 (m, 2H), 3.91 (t, *J* = 6.4 Hz, 2H), 3.52 (q, *J* = 7.3 Hz, 6H), 3.33 – 3.26 (m, 2H), 1.79 – 1.76 (m, 2H), 1.74 – 1.70 (m, 2H), 1.49 – 1.38 (m, 17H).

**<sup>13</sup>C NMR** (101 MHz, Chloroform-*d*)  $\delta$  157.08 (d, *J* = 237.8 Hz), 155.19 (d, *J* = 2.0 Hz), 115.71 (d, *J* = 23.0 Hz), 115.42 (d, *J* = 7.9 Hz), 68.44, 57.58, 53.58, 29.15, 29.09, 29.08, 26.41, 25.84, 22.13, 8.14.

**<sup>19</sup>F NMR** (376 MHz, Chloroform-*d*)  $\delta$  -124.38.

**HRMS** (ESI) *m/z*: [M-Br]<sup>+</sup> Calcd for C<sub>20</sub>H<sub>35</sub>FNO<sup>+</sup>: 324.2697 ; Found: 324.2692 .

**N,N,N-triethyl-8-(4-fluorophenoxy)octan-1-aminium perchlorate (37).** To a solution of **36** (50 mg, 0.124 mmol) in deionised water (7.5 mL), NaClO<sub>4</sub> (0.5 g) was added. The mixture was stirred at room temperature overnight. Then the residue was extracted with EtOAc (5 × 7 mL). The organic phase was dried with Na<sub>2</sub>SO<sub>4</sub>, filtered, and concentrated in a vacuum to give the **37** as a white solid (40 mg, 76.4%).

**<sup>1</sup>H NMR** (400 MHz, Chloroform-*d*)  $\delta$  7.00 – 6.91 (m, 2H), 6.86 – 6.79 (m, 2H), 3.91 (t, *J* = 6.4 Hz, 2H), 3.33 (q, *J* = 7.3 Hz, 6H), 3.19 – 3.10 (m, 2H), 1.75 (p, *J* = 6.6 Hz, 2H), 1.70 – 1.64 (m, 2H), 1.49 – 1.42 (m, 2H), 1.41 – 1.30 (m, 15H).

**<sup>13</sup>C NMR** (101 MHz, Chloroform-*d*)  $\delta$  157.22 (d, *J* = 237.7 Hz), 155.35 (d, *J* = 2.0 Hz), 115.86 (d, *J* = 23.0 Hz), 115.58 (d, *J* = 7.9 Hz), 68.59, 57.43, 53.30, 29.26, 29.15, 29.09, 26.38, 25.93, 21.89, 7.74.

**<sup>19</sup>F NMR** (376 MHz, Chloroform-*d*)  $\delta$  -124.43.

**HRMS** (ESI) *m/z*: [M-ClO<sub>4</sub>]<sup>+</sup> Calcd for C<sub>20</sub>H<sub>35</sub>FNO<sup>+</sup>: 324.2697 ; Found: 324.2695 .

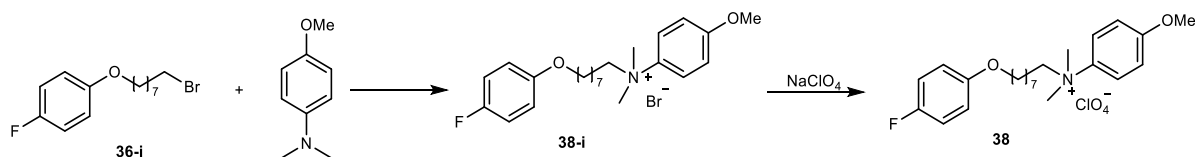

**N-(8-(4-fluorophenoxy)octyl)-4-methoxy-N,N-dimethylbenzenaminium bromide (38-i)** To a solution of **36-©** (0.5 mmol,

152 mg) and (4-methoxy-phenyl)-dimethyl-amine (2 mmol, 300 mg) in MeCN (2ml) was stirred under 80°C overnight. The reaction was cooled to room temperature, and then the solvent was evaporated under vacuum. The residue was washed three times with ether to obtain the title compound (100 mg, 44%), which was used in the next step without further purification.

**N-(8-(4-fluorophenoxy)octyl)-4-methoxy-N,N-dimethylbenzenaminium perchlorate (38).** To a solution of **38-©** (70 mg, 0.154 mmol) in 23ptimized water (7 mL) was added NaClO<sub>4</sub> (500 mg). The mixture was stirred at room temperature overnight. Then the residue was extracted with EtOAc (5 × 7mL). The organic phase was dried with Na<sub>2</sub>SO<sub>4</sub>, filtered, and concentrated in a vacuum to give the title compound as a white solid (62 mg, 84.9%).

**<sup>1</sup>H NMR** (400 MHz, Chloroform-*d*) δ 7.59 (d, *J* = 9.3 Hz, 2H), 7.05 (d, *J* = 9.3 Hz, 2H), 6.94 (t, *J* = 8.7 Hz, 2H), 6.79 (m, 2H), 3.94 – 3.85 (m, 4H), 3.84 (s, 3H), 3.63 (s, 6H), 1.69 (dt, *J* = 14.5, 6.6 Hz, 2H), 1.45 – 1.24 (m, 10H).

**<sup>13</sup>C NMR** (101 MHz, CDCl<sub>3</sub>) δ 160.49, 157.09 (d, *J* = 237.7 Hz), 155.20 (d, *J* = 2.0 Hz), 136.45, 121.67, 115.72 (d, *J* = 22.9 Hz), 115.71, 115.43 (d, *J* = 7.9 Hz), 69.53, 68.48, 55.83, 55.00, 29.10, 28.90, 28.82, 25.74, 25.70, 23.46.

**<sup>19</sup>F NMR** (376 MHz, Chloroform-*d*) δ -124.44.

**HRMS** (ESI) *m/z*: [M-ClO<sub>4</sub>]<sup>+</sup> Calcd for C<sub>23</sub>H<sub>33</sub>FNO<sub>2</sub><sup>+</sup>: 374.2490 ; Found: 374.2484 .

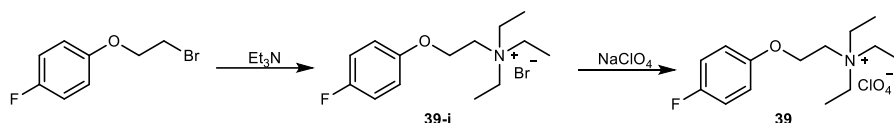

**N,N,N-triethyl-2-(4-fluorophenoxy)ethan-1-aminium bromide (39-i).** A solution of 1-(2-bromoethoxy)-4-fluorobenzene (110 mg, 0.5 mmol) and triethylamine (0.5 mL) in MeCN (2 ml) was stirred under 80°C overnight. The reaction was cooled to room temperature, and then the solvent was evaporated under vacuum. The residue was washed three times with ether to obtain the title compound (150 mg, 93.7 %), which was used in the next step without further purification.

**N,N,N-triethyl-2-(4-fluorophenoxy)ethan-1-aminium perchlorate (39).** To a solution of **39-©** (150 mg, 0.468 mmol) in deionised water (8 mL), NaClO<sub>4</sub> (0.5g) was added. The mixture was stirred at room temperature overnight. Then the residue was extracted with EtOAc (5 × 7 mL). The organic phase was dried with Na<sub>2</sub>SO<sub>4</sub>, filtered, and concentrated in a vacuum to give the title compound as a colourless liquid (40 mg, 27%).

**<sup>1</sup>H NMR** (400 MHz, DMSO-*d*<sub>6</sub>) δ 7.18 (t, *J* = 8.8 Hz, 2H), 7.05 – 6.97 (m, 2H), 4.39 – 4.33 (m, 3H), 3.69 – 3.63 (m, 3H), 3.37 (q, *J* = 7.4 Hz, 6H), 1.22 (t, *J* = 7.1 Hz, 9H).

**<sup>13</sup>C NMR** (101 MHz, DMSO-*d*<sub>6</sub>) δ 157.43 (d, *J* = 236.5 Hz), 154.22 (d, *J* = 2.0 Hz), 116.52 (d, *J* = 2.8 Hz), 116.36 (d, *J* = 12.3 Hz), 62.02, 55.64, 53.38, 7.76.

**<sup>19</sup>F NMR** (376 MHz, DMSO-*d*<sub>6</sub>) δ -123.02.

**HRMS** (ESI) *m/z*: [M-ClO<sub>4</sub>]<sup>+</sup> Calcd for C<sub>14</sub>H<sub>23</sub>FNO<sup>+</sup>: 240.1758 ; Found: 240.1755 .

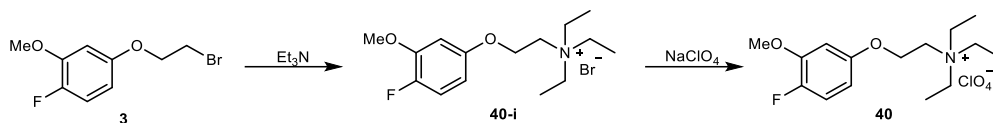

**N,N,N-triethyl-2-(4-fluoro-3-methoxyphenoxy)ethan-1-aminium bromide (40-i).** The solution of compound **3** (125 mg, 0.5 mmol) and triethylamine (0.5 mL) in MeCN (2 mL) was stirred overnight at 80 °C. The reaction was cooled to room temperature, and the solvent was evaporated under vacuum. The residue was washed three times with ether to obtain the title compound (160 mg, 92%), which was used in the next step without further purification.

**N,N,N-triethyl-2-(4-fluoro-3-methoxyphenoxy)ethan-1-aminium perchlorate (40).** To a solution of **40-i** (35 mg, 0.10 mmol) in deionized water (7.5 mL), NaClO<sub>4</sub> (0.5 g) was added. The mixture was stirred at room temperature overnight. Then the residue was extracted with EtOAc (5 × 7 mL). The organic phase was dried with Na<sub>2</sub>SO<sub>4</sub>, filtered, and concentrated in a vacuum to give the **40** as a white solid (30 mg, 81.2%).

**<sup>1</sup>H NMR** (400 MHz, DMSO-*d*<sub>6</sub>) δ 7.17 (dd, *J* = 11.4, 8.9 Hz, 1H), 6.77 (dd, *J* = 7.3, 2.9 Hz, 1H), 6.53 (dt, *J* = 9.0, 3.1 Hz, 1H), 4.37 (t, *J* = 4.8 Hz, 2H), 3.85 (s, 3H), 3.66 (t, *J* = 4.8 Hz, 2H), 3.38 (q, *J* = 7.2 Hz, 6H), 1.24 (t, *J* = 7.1 Hz, 9H).

**<sup>13</sup>C NMR** (101 MHz, DMSO-*d*<sub>6</sub>) δ 154.61 (d, *J* = 2.0 Hz), 148.18 (d, *J* = 11.9 Hz), 147.17 (d, *J* = 236.7 Hz), 116.30 (d, *J* = 19.4 Hz), 105.74 (d, *J* = 6.6 Hz), 102.11 (d, *J* = 1.2 Hz), 62.04, 56.60, 55.60, 53.38, 7.77.

**<sup>19</sup>F NMR** (376 MHz, DMSO-*d*<sub>6</sub>) δ -144.49.

**HRMS** (ESI) *m/z*: [M-ClO<sub>4</sub>]<sup>+</sup> Calcd for C<sub>15</sub>H<sub>25</sub>FNO<sub>2</sub><sup>+</sup>: 270.1864; Found: 270.1863.

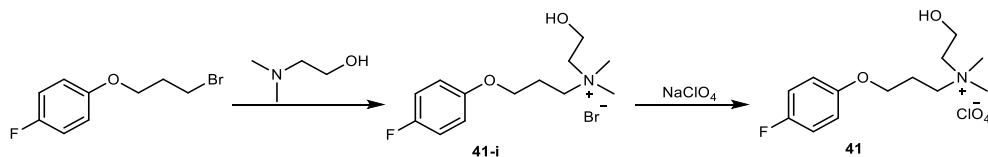

**3-(4-fluorophenoxy)-N-(2-hydroxyethyl)-N,N-dimethylpropan-1-aminium bromide (41-i).** The solution of 1-(3-bromopropoxy)-4-fluorobenzene (117 mg, 0.5 mmol) and 2-dimethylaminoethanol triethylamine (0.5 mL) in MeCN (2 mL) was stirred under 80°C overnight. The reaction was cooled to room temperature, then the solvent was evaporated under vacuum. The residue was washed three times with ether to obtain the title compound (100 mg, 61.9%), which was used in the next step without further purification.

**3-(4-fluorophenoxy)-N-(2-hydroxyethyl)-N,N-dimethylpropan-1-aminium perchlorate (41).** To a solution **41-i** (100 mg, 0.31 mmol) in deionised water (7.5 mL), NaClO<sub>4</sub> (500 mg) was added. The mixture was stirred at room temperature overnight. Then the residue was extracted with EtOAc (5 × 7 mL). The organic phase was dried with Na<sub>2</sub>SO<sub>4</sub>, filtered, and concentrated in a vacuum to give the title compound as a white solid (70 mg, 66.1%).

**<sup>1</sup>H NMR** (400 MHz, DMSO-*d*<sub>6</sub>) δ 7.15 (t, *J* = 8.8 Hz, 2H), 6.99 – 6.94 (m, 2H), 5.30 (t, *J* = 4.9 Hz, 1H), 4.03 (t, *J* = 6.0 Hz, 2H), 3.90 – 3.78 (m, 2H), 3.57 – 3.49 (m, 2H), 3.47 – 3.40 (m, 3H), 3.11 (s, 6H), 2.18 (dq, *J* = 11.8, 5.9 Hz, 3H).

**<sup>13</sup>C NMR** (101 MHz, DMSO-*d*<sub>6</sub>) δ 156.67 (d, *J* = 236.0 Hz), 154.52 (d, *J* = 1.9 Hz), 115.95 (d, *J* = 14.0 Hz), 115.80, 65.35, 64.79, 64.76, 64.74, 61.66, 61.64, 61.61, 54.95, 51.03, 51.00, 50.96, 22.30.

$^{19}\text{F}$  NMR (376 MHz, DMSO- $d_6$ )  $\delta$  -123.58.

HRMS (ESI)  $m/z$ :  $[\text{M}-\text{ClO}_4]^+$  Calcd for  $\text{C}_{13}\text{H}_{21}\text{FNO}_2^+$ : 242.1551 ; Found: 242.1550 .

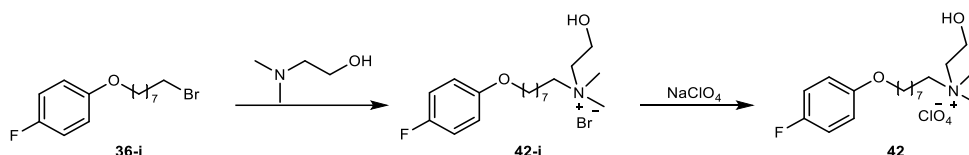

**8-(4-fluorophenoxy)-N-(2-hydroxyethyl)-N,N-dimethyloctan-1-aminium bromide (42-i).** The solution of **36-©** (0.152g, 0.5 mmol) and 2-dimethylaminoethanol triethylamine (0.5 ml) in MeCN (2 ml) was stirred under 80°C overnight. The reaction was cooled to room temperature, and the solvent was evaporated under vacuum. The residue was washed three times with ether to obtain the title compound (189 mg, 96.6%), which was used in the next step without further purification.

**8-(4-fluorophenoxy)-N-(2-hydroxyethyl)-N,N-dimethyloctan-1-aminium perchlorate (42)** To a solution of **42-©** (0.06 g, 0.153mmol) in deionized water (7.5 mL) was added NaClO<sub>4</sub> (0.5g). The mixture was stirred at room temperature overnight. Then the residue was extracted with EtOAc (5 × 7mL). The organic phase was dried with Na<sub>2</sub>SO<sub>4</sub>, filtered, and concentrated in a vacuum to give the **42** as a white solid (28 mg, 44.5%).

$^1\text{H}$  NMR (400 MHz, Chloroform- $d$ )  $\delta$  6.99 – 6.92 (m, 2H), 6.85 – 6.79 (m, 2H), 4.10 (s, 2H), 3.90 (t,  $J$  = 6.5 Hz, 2H), 3.64 – 3.49 (m, 3H), 3.40 – 3.31 (m, 2H), 3.17 (s, 6H), 1.74 (m, 6H), 1.44 (m, 2H), 1.37 (s, 6H).

$^{13}\text{C}$  NMR (101 MHz, CDCl<sub>3</sub>)  $\delta$  157.10 (d,  $J$  = 237.6 Hz), 155.22 (d,  $J$  = 2.1 Hz), 115.76 (d,  $J$  = 23.0 Hz), 115.51 (d,  $J$  = 7.9 Hz), 68.54, 66.21, 65.55, 56.39, 51.65, 29.15, 29.00, 28.92, 26.06, 25.81, 22.63.

$^{19}\text{F}$  NMR (376 MHz, Chloroform- $d$ )  $\delta$  -124.33.

HRMS (ESI)  $m/z$ :  $[\text{M}-\text{ClO}_4]^+$  Calcd for  $\text{C}_{18}\text{H}_{31}\text{FNO}_2^+$ : 312.2333; Found: 312.2332.

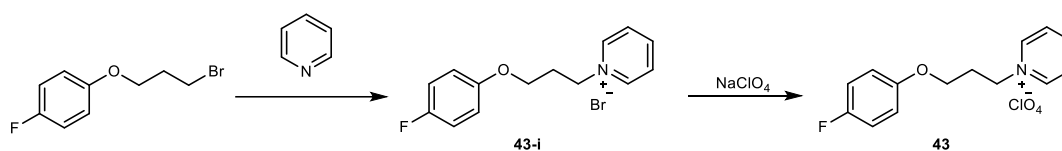

**1-(3-(4-fluorophenoxy)propyl) 25 ptimize-1-ium bromide (43-i).** The solution of 1-(3-bromopropoxy)-4-fluorobenzene (0.117 g, 0.5 mmol) and pyridine (0.5 mL) in MeCN (2 ml) was stirred under 80°C overnight. The reaction was cooled to room temperature, and the solvent was evaporated under vacuum. The residue was washed three times with ether to obtain the **1-(3-(4-fluorophenoxy)propyl) 25 ptimize-1-ium bromide** (0.101 g, 65 %), which was used in the next step without further purification.

**1-(3-(4-fluorophenoxy)propyl) 25 ptimize-1-ium perchlorate (43).** To a solution of **43-©** (0.05 g, 0.160 mmol) in 25ptimized water (7.5 mL), NaClO<sub>4</sub> (0.5g) was added. The mixture was stirred overnight at room temperature. Then the residue was extracted with EtOAc (5 × 7 mL). The organic phase was dried with Na<sub>2</sub>SO<sub>4</sub>, filtered, and concentrated in a vacuum to give the title compound as a white solid (48 mg, 90.4%).

**<sup>1</sup>H NMR** (400 MHz, DMSO-*d*<sub>6</sub>) δ 9.12 (d, *J* = 5.6 Hz, 2H), 8.61 (t, *J* = 7.8 Hz, 1H), 8.61 (t, *J* = 4.1 Hz, 2H), 7.13 – 7.06 (m, 2H), 6.83 – 6.76 (m, 2H), 4.79 (t, *J* = 6.8 Hz, 2H), 4.05 (t, *J* = 5.7 Hz, 2H), 2.42 (p, *J* = 6.4 Hz, 2H).

**<sup>13</sup>C NMR** (101 MHz, DMSO-*d*<sub>6</sub>) δ 157.09 (d, *J* = 236.0 Hz), 154.73 (d, *J* = 1.8 Hz), 146.07, 145.53, 128.43, 116.31 (d, *J* = 23.0 Hz), 116.04 (d, *J* = 8.1 Hz), 65.86, 59.39, 30.35.

**<sup>19</sup>F NMR** (376 MHz, DMSO-*d*<sub>6</sub>) δ -123.67.

**HRMS** (ESI) *m/z*: [M-ClO<sub>4</sub>]<sup>+</sup> Calcd for C<sub>14</sub>H<sub>15</sub>FNO<sup>+</sup>: 232.1132 ; Found: 232.1129 .

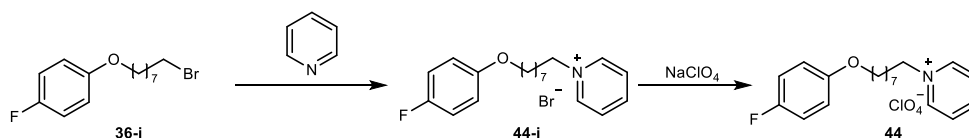

**1-(8-(4-fluorophenoxy)octyl)26ptimize-1-ium bromide (44-i).** The MeCN (2 mL) solution of **36-©** (152 mg, 0.5 mmol) and pyridine (0.5 mL) was stirred under 80°C overnight. The reaction was cooled to room temperature; then, the solvent was evaporated under vacuum. The residue was washed three times with ether to obtain the title compound (149 mg, 78% yield), which was used in the next step without further purification.

**1-(8-(4-fluorophenoxy)octyl)26ptimize-1-ium perchlorate (44).** To a solution of **44-©** (0.05 g, 0.131 mmol) in 26ptimized water (7.5 mL) was added NaClO<sub>4</sub> (0.5 g). The mixture was stirred at room temperature overnight. Then the residue was extracted with EtOAc (5 × 7 mL). The organic phase was dried with Na<sub>2</sub>SO<sub>4</sub>, filtered, and concentrated in a vacuum to give the title compound as a white solid (20 mg, 38.0% yield).

**<sup>1</sup>H NMR** (400 MHz, Chloroform-*d*) δ 8.84 (d, *J* = 5.7 Hz, 2H), 8.48 (t, *J* = 7.8 Hz, 1H), 8.05 (t, *J* = 7.1 Hz, 2H), 6.95 (t, *J* = 8.7 Hz, 2H), 6.85 – 6.78 (m, 2H), 4.65 (t, *J* = 7.6 Hz, 2H), 3.88 (t, *J* = 6.5 Hz, 2H), 2.07 – 1.96 (m, 2H), 1.72 (m, 2H), 1.48 – 1.31 (m, 8H).

**<sup>13</sup>C NMR** (101 MHz, CDCl<sub>3</sub>) δ 157.09 (d, *J* = 237.7 Hz), 155.21 (d, *J* = 2.1 Hz), 145.48, 144.51, 128.64, 115.74 (d, *J* = 23.1 Hz), 115.46 (d, *J* = 7.8 Hz), 68.49, 62.60, 31.54, 29.15, 28.94, 28.79, 25.93, 25.81.

**<sup>19</sup>F NMR** (376 MHz, Chloroform-*d*) δ -124.38.

**HRMS** (ESI) *m/z*: [M-ClO<sub>4</sub>]<sup>+</sup> Calcd for C<sub>19</sub>H<sub>25</sub>FNO<sup>+</sup>: 302.1915 ; Found: 302.1909 .

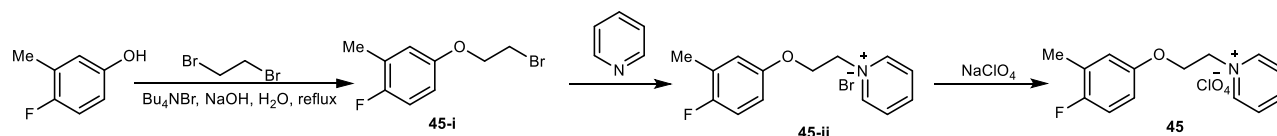

**4-(2-bromoethoxy)-1-fluoro-2-methylbenzene (45-i).** The title compound was prepared according to general procedure **A** from 4-fluoro-3-methylphenol (1.0g, 4.5 mmol, 1.0 equiv.) and 1,2-dibromoethane (1.56 mL, 18 mmol, 4 equiv.). It was obtained as a colourless liquid (80 mg, 43.3%).

**<sup>1</sup>H NMR** (400 MHz, Chloroform-*d*) δ 6.91 (t, *J* = 9.0 Hz, 1H), 6.73 (dd, *J* = 6.2, 3.1 Hz, 1H), 6.67 (dt, *J* = 8.5, 3.5 Hz, 1H), 4.23 (t, *J* = 6.3 Hz, 2H), 3.61 (t, *J* = 6.3 Hz, 2H), 2.25 (d, *J* = 1.8 Hz, 3H).

**<sup>13</sup>C NMR** (101 MHz, Chloroform-*d*)  $\delta$  156.29 (d,  $J$  = 237.7 Hz), 153.87 (d,  $J$  = 2.2 Hz), 125.85 (d,  $J$  = 18.9 Hz), 117.74 (d,  $J$  = 4.8 Hz), 115.43 (d,  $J$  = 24.1 Hz), 112.97 (d,  $J$  = 8.0 Hz), 68.57, 29.17, 14.80 (d,  $J$  = 3.3 Hz).

**<sup>19</sup>F NMR** (376 MHz, Chloroform-*d*)  $\delta$  -127.12.

**HRMS** (ESI)  $m/z$ : [M-Br]<sup>+</sup> Calcd for C<sub>9</sub>H<sub>10</sub>FO<sup>+</sup>: 153.0710 ; Found: 153.0707.

**1-(2-(4-fluoro-3-methylphenoxy)ethyl)27ptimize-1-ium bromide (45-ii).** The solution of **45-©** (117 mg, 0.5 mmol) and pyridine (0.5 mL) in MeCN (2 ml) was stirred under 80°C overnight. The reaction was cooled to room temperature, and then the solvent was evaporated under vacuum. The residue was washed three times with ether to obtain the title compound (108 mg, 69.4%), which was used in the next step without further purification.

**1-(2-(4-fluoro-3-methylphenoxy)ethyl)27ptimize-1-ium perchlorate (45).** To a solution of **45-ii** (70 mg, 0.224 mmol) in deionized water (7 mL) was added NaClO<sub>4</sub> (0.5g). The mixture was stirred at room temperature overnight. Then the residue was extracted with EtOAc (5 × 7 mL). The organic phase was dried with Na<sub>2</sub>SO<sub>4</sub>, filtered, and concentrated in a vacuum to give the title compound as a yellow viscous liquid (66 mg, 88.7 %).

**<sup>1</sup>H NMR** (400 MHz, Methanol-*d*<sub>4</sub>)  $\delta$  9.06 (d,  $J$  = 5.4 Hz, 2H), 8.64 (t,  $J$  = 7.8 Hz, 1H), 8.15 ((t,  $J$  = 7.2 Hz, 2H), 6.90 (t,  $J$  = 9.1 Hz, 1H), 6.79 (dd,  $J$  = 6.1, 3.1 Hz, 1H), 6.71 (dt,  $J$  = 8.7, 3.5 Hz, 1H), 5.04 (t,  $J$  = 4.8 Hz, 2H), 4.47 (t,  $J$  = 4.9 Hz, 2H), 2.20 (d,  $J$  = 2.0 Hz, 3H).

**<sup>13</sup>C NMR** (101 MHz, Methanol-*d*<sub>4</sub>)  $\delta$  157.76 (d,  $J$  = 237.1 Hz), 154.97 (d,  $J$  = 2.3 Hz), 147.46, 146.65, 129.33, 126.99 (d,  $J$  = 19.0 Hz), 118.45 (d,  $J$  = 4.7 Hz), 116.40 (d,  $J$  = 24.6 Hz), 114.06 (d,  $J$  = 8.0 Hz), 67.97, 62.30, 14.59 (d,  $J$  = 3.6 Hz).

**<sup>19</sup>F NMR** (376 MHz, Methanol-*d*<sub>4</sub>)  $\delta$  -128.93.

**HRMS** (ESI)  $m/z$ : [M-ClO<sub>4</sub>]<sup>+</sup> Calcd for C<sub>14</sub>H<sub>15</sub>FNO<sup>+</sup>: 232.1132 ; Found: 232.1129 .

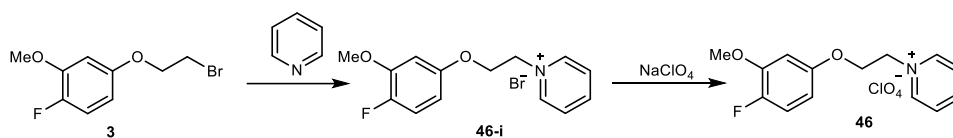

**1-(2-(4-fluoro-3-methoxyphenoxy)ethyl)27ptimize-1-ium bromide (46-i).** The solution of **3** (0.125g, 0.5 mmol) and pyridine (0.5 mL) in MeCN (2 ml) was stirred under 80°C overnight. The reaction was cooled to room temperature; then the solvent was evaporated under vacuum. The residue was washed three times with ether to give the title compound (130 mg, 81.4%), which was used in the next step without further purification.

**1-(2-(4-fluoro-3-methoxyphenoxy)ethyl)27ptimize-1-ium perchlorate (46).** To a solution of **46-©** (70 mg, 0.219 mmol) in 27ptimized water (8 ml) and acetone (3 ml) was added NaClO<sub>4</sub> (0.5g). The mixture was stirred at room temperature overnight. Then the residue was extracted with EtOAc (5 × 7 mL). The organic phase was dried with Na<sub>2</sub>SO<sub>4</sub>, filtered, and concentrated in vacuum to give the title compound as a yellow viscous liquid (30 mg, 39.5 %).

**<sup>1</sup>H NMR** (400 MHz, DMSO-*d*<sub>6</sub>)  $\delta$  9.13 (d,  $J$  = 5.6 Hz, 2H), 8.65 (t,  $J$  = 7.8 Hz, 1H), 8.20 (t,  $J$  = 7.2 Hz, 2H), 7.11 (dd,  $J$  = 11.3,

8.9 Hz, 1H), 6.70 (dd,  $J = 7.3, 2.9$  Hz, 1H), 6.45 (dt,  $J = 8.9, 3.1$  Hz, 1H), 5.03 (t,  $J = 4.9$  Hz, 2H), 4.50 (t,  $J = 4.9$  Hz, 2H), 3.79 (s, 3H).

$^{13}\text{C}$  NMR (101 MHz, DMSO)  $\delta$  154.17 (d,  $J = 2.0$  Hz), 147.68 (d,  $J = 11.9$  Hz), 146.68 (d,  $J = 236.9$  Hz), 146.10, 145.43, 127.94, 115.81 (d,  $J = 19.4$  Hz), 105.09 (d,  $J = 6.7$  Hz), 101.78 (d,  $J = 1.3$  Hz), 66.70, 59.98, 56.05.

$^{19}\text{F}$  NMR (376 MHz, DMSO- $d_6$ )  $\delta$  -144.34.

HRMS (ESI)  $m/z$ :  $[\text{M}-\text{ClO}_4]^+$  Calcd for  $\text{C}_{14}\text{H}_{15}\text{FNO}_2^+$ : 248.1081 ; Found: 248.1077 .

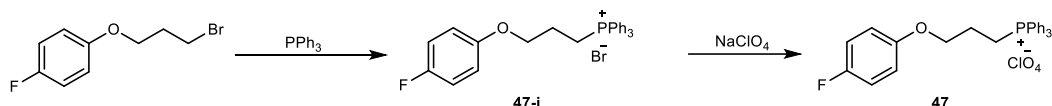

**(3-(4-fluorophenoxy)propyl)triphenylphosphonium bromide (47-i).** The solution of 1-(3-bromopropoxy)-4-fluorobenzene (117 mg, 0.5 mmol) and triphenylphosphine (0.5 g, 1.9 mmol) in MeCN (2 ml) was stirred under 80°C overnight. The reaction was cooled to room temperature, then the solvent was evaporated under vacuum. The residue was washed three times with ether to give the title compound (0.108 g, 43.7 %) which was used in the next step without further purification.

**(3-(4-fluorophenoxy)propyl)triphenylphosphonium perchlorate (47).** To a solution of **47-i** (70 mg, 0.141 mmol) in 28 optimized water (2 ml) and acetone (6 ml) was added NaClO<sub>4</sub> (0.5 mg). The mixture was stirred at room temperature overnight. Then the residue was extracted with EtOAc (5 × 7 ml). The organic phase was dried with Na<sub>2</sub>SO<sub>4</sub>, filtered, and concentrated in vacuum to give the title compound as a white solid (60 mg, 39.5 %).

$^1\text{H}$  NMR (400 MHz, Chloroform- $d$ )  $\delta$  7.83 – 7.78 (m, 3H), 7.76 – 7.67 (m, 12H), 6.94 – 6.87 (m, 2H), 6.84 – 6.78 (m, 2H), 4.17 (t,  $J = 5.5$  Hz, 2H), 3.58 – 3.46 (m, 2H), 2.19 – 2.10 (m, 2H).

$^{13}\text{C}$  NMR (101 MHz, Chloroform- $d$ )  $\delta$  157.51 (d,  $J = 238.5$  Hz), 154.35 (d,  $J = 2.0$  Hz), 135.42 (d,  $J = 3.0$  Hz), 133.58 (d,  $J = 10.0$  Hz), 130.75 (d,  $J = 12.6$  Hz), 117.94 (d,  $J = 86.5$  Hz), 115.92 (d,  $J = 34.6$  Hz), 115.85 (d,  $J = 3.5$  Hz), 67.09 (d,  $J = 16.9$  Hz), 22.89 (d,  $J = 3.5$  Hz), 19.38 (d,  $J = 54.1$  Hz).

$^{19}\text{F}$  NMR (376 MHz, Chloroform- $d$ )  $\delta$  -123.50.

HRMS (ESI)  $m/z$ :  $[\text{M}-\text{ClO}_4]^+$  Calcd for  $\text{C}_{27}\text{H}_{25}\text{FOP}^+$ : 415.1622 ; Found: 415.1618 .

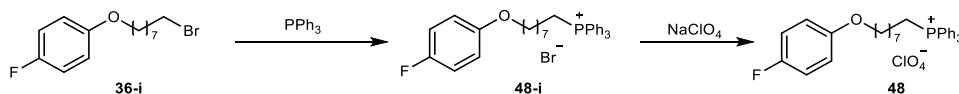

**(8-(4-fluorophenoxy)octyl)triphenylphosphonium bromide (48-i).** The solution of **36-i** (0.152 g, 0.5 mmol) and triphenylphosphine (0.5 g, 1.9 mmol) in MeCN (2 ml) was stirred under 80 °C overnight. The reaction was cooled to room temperature, then the solvent was evaporated under vacuum. The residue was washed three times with ether to give the title compound (0.144 g, 51.1 %) which was used in the next step without further purification.

**(8-(4-fluorophenoxy)octyl)triphenylphosphonium perchlorate (48).** To a solution of **48-i** (0.070 g, 0.124 mmol) in



29 optimized water (2 ml) and acetone (6 ml) was added NaClO<sub>4</sub> (0.5 g). The mixture was stirred at room temperature overnight. Then the residue was extracted with EtOAc (5 × 7 mL). The organic phase was dried with Na<sub>2</sub>SO<sub>4</sub>, filtered, and concentrated in vacuum to give the title compound as a colourless oil (54 mg, 74.5% yield).

**<sup>1</sup>H NMR** (400 MHz, Chloroform-*d*) δ 7.84 – 7.75 (m, 3H), 7.75 – 7.65 (m, 12H), 6.92 (t, *J* = 8.7 Hz, 2H), 6.81 – 6.77 (m, 2H), 3.86 (t, *J* = 6.5 Hz, 2H), 3.30 – 3.23 (m, 2H), 1.69 (p, *J* = 6.8 Hz, 2H), 1.44 – 1.34 (m, 2H), 1.35 – 1.21 (m, 8H).

**<sup>13</sup>C NMR** (101 MHz, Chloroform-*d*) δ 157.15 (d, *J* = 237.5 Hz), 155.33 (d, *J* = 2.0 Hz), 135.32 (d, *J* = 3.2 Hz), 133.54 (d, *J* = 9.9 Hz), 130.71 (d, *J* = 12.6 Hz), 118.18 (d, *J* = 86.0 Hz), 115.78 (d, *J* = 22.9 Hz), 115.53 (d, *J* = 7.9 Hz), 68.62, 30.36 (d, *J* = 15.9 Hz), 29.80, 29.10 (d, *J* = 21.9 Hz), 28.96, 25.87, 22.65 (d, *J* = 4.4 Hz), 22.25 (d, *J* = 51.1 Hz).

**<sup>19</sup>F NMR** (376 MHz, Chloroform-*d*) δ -124.53.

**HRMS (ESI)** *m/z*: [M-ClO<sub>4</sub>]<sup>+</sup> Calcd for C<sub>32</sub>H<sub>35</sub>FOP<sup>+</sup>: 485.2404 ; Found: 485.2402 .

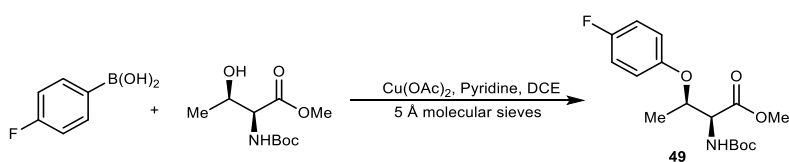

**methyl N-(tert-butoxycarbonyl)-O-(4-fluorophenyl)-L-threoninate (49)**. The title compound was prepared according to the general procedure **F** from (4-fluorophenyl)boronic acid (252 mg, 1.8 mmol) and methyl (tert-butoxycarbonyl)-L-threoninate (210 mg, 0.90 mmol) and obtained as a colourless oil (69 mg, 23.5%).

**<sup>1</sup>H NMR** (400 MHz, Chloroform-*d*) δ 7.01 – 6.90 (m, 2H), 6.87 – 6.77 (m, 2H), 5.37 (d, *J* = 9.8 Hz, 1H), 4.85 (qd, *J* = 6.2, 2.4 Hz, 1H), 4.49 (dd, *J* = 9.7, 2.4 Hz, 1H), 3.68 (s, 3H), 1.49 (s, 9H), 1.32 (d, *J* = 6.3 Hz, 3H).

**<sup>13</sup>C NMR** (100 MHz, Chloroform-*d*) δ 171.01, 157.83 (d, *J* = 239.9 Hz), 156.10, 153.19 (d, *J* = 2.4 Hz), 117.97 (d, *J* = 8.1 Hz), 115.95 (d, *J* = 23.2 Hz), 80.22, 75.62, 57.87, 52.51, 28.32, 16.23.

**<sup>19</sup>F NMR** (376 MHz, Chloroform-*d*) δ -122.22.

**HRMS (ESI)** *m/z*: [M+Na]<sup>+</sup> Calcd for C<sub>16</sub>H<sub>22</sub>FNO<sub>5</sub>Na<sup>+</sup>: 350.1374; Found: 350.1370.

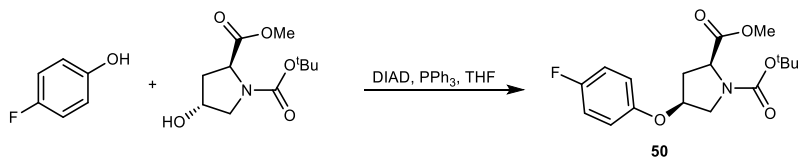

**1-(tert-butyl) 2-methyl (2S,4S)-4-(4-fluorophenoxy)pyrrolidine-1,2-dicarboxylate (50)**. The 4-fluorophenol (200 mg, 1.79 mmol, 1.0 equiv.) and PPh<sub>3</sub> (525 mg, 1.97 mmol, 1.1 equiv.) were dissolved in THF (10 ml). The solution was cooled to 0°C, to which the *N*-Boc-trans-4-Hydroxy-L-proline methyl ester (483 mg, 1.97 mmol, 1.1 equiv.) and DIAD (393 μl, 1.97 mmol, 1.1 equiv.) were added. The solution was stirred at room temperature overnight and then extracted with ethyl acetate and water. The organic phase was dried with Na<sub>2</sub>SO<sub>4</sub>, filtered, and concentrated in vacuo to give the crude product which was purified by silica gel column with PE/EA = 5/1 as the eluant to give the title compound as a white solid (400 mg, 65.9%).

<sup>1</sup>H NMR (400 MHz, Chloroform-*d*) δ 6.99 – 6.93 (m, 2H), 6.77 – 6.73 (m, 2H), 4.88 – 4.77 (m, 1H), 4.56 – 4.41 (m, 1H), 3.80 – 3.59 (m, 5H), 2.50 – 2.36 (m, 2H), 1.46 (d, *J* = 17.9 Hz, 9H). The spectra data matched the reported literature [4]

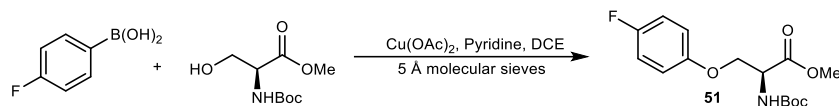

**methyl N-(tert-butoxycarbonyl)-O-(4-fluorophenyl)-L-serinate (51).** The title compound was prepared according to the general procedure F from (4-fluorophenyl)boronic acid (252 mg, 1.8 mmol) and methyl (tert-butoxycarbonyl)-L-serinate (197 mg, 0.90 mmol), and obtained as a colorless oil (83 mg, 29.5%).

<sup>1</sup>H NMR (400 MHz, Chloroform-*d*) δ 7.01 – 6.91 (m, 2H), 6.86 – 6.77 (m, 2H), 5.48 (d, *J* = 8.7 Hz, 1H), 4.65 (dd, *J* = 7.7, 3.9 Hz, 1H), 4.35 (dd, *J* = 9.2, 3.0 Hz, 1H), 4.17 (dd, *J* = 9.3, 3.2 Hz, 1H), 3.77 (s, 3H), 1.46 (s, 9H).

<sup>13</sup>C NMR (100 MHz, Chloroform-*d*) δ 170.51, 157.65 (d, *J* = 239.3 Hz), 155.37, 154.36 (d, *J* = 1.8 Hz), 115.91 (d, *J* = 23.0 Hz), 115.76 (d, *J* = 7.9 Hz), 80.33, 68.98, 53.55, 52.72, 28.30.

<sup>19</sup>F NMR (376 MHz, Chloroform-*d*) δ -122.91.

HRMS (ESI) *m/z*: [M+Na]<sup>+</sup> Calcd for C<sub>15</sub>H<sub>20</sub>FNO<sub>5</sub>Na<sup>+</sup>: 336.1218; Found: 336.1217.

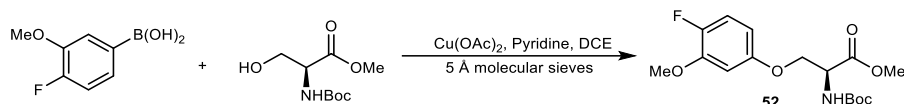

**methyl N-(tert-butoxycarbonyl)-O-(4-fluoro-3-methoxyphenyl)-L-serinate (52).** The title compound was prepared according to the general procedure F from (4-fluoro-3-methoxyphenyl)boronic acid (153 mg, 0.90 mmol) and methyl (tert-butoxycarbonyl)-L-serinate (99 mg, 0.45 mmol), and obtained as a light yellow oil (38 mg, 24.5%).

<sup>1</sup>H NMR (400 MHz, Chloroform-*d*) δ 6.96 (dd, *J* = 11.0, 8.9 Hz, 1H), 6.52 (dd, *J* = 7.1, 2.9 Hz, 1H), 6.34 (dt, *J* = 8.9, 3.1 Hz, 1H), 5.48 (d, *J* = 8.8 Hz, 1H), 4.64 (dd, *J* = 8.0, 3.6 Hz, 1H), 4.35 (dd, *J* = 9.3, 3.0 Hz, 1H), 4.17 (dd, *J* = 9.3, 3.2 Hz, 1H), 3.86 (s, 3H), 3.78 (s, 3H), 1.46 (s, 9H).

<sup>13</sup>C NMR (100 MHz, Chloroform-*d*) δ 170.52, 155.37, 154.72 (d, *J* = 2.4 Hz), 148.20 (d, *J* = 12.0 Hz), 147.65 (d, *J* = 238.9 Hz), 115.74 (d, *J* = 19.8 Hz), 104.40 (d, *J* = 6.7 Hz), 101.88, 80.36, 68.85, 56.22, 53.51, 52.75, 28.31.

<sup>19</sup>F NMR (376 MHz, Chloroform-*d*) δ -144.47.

HRMS (ESI) *m/z*: [M+Na]<sup>+</sup> Calcd for C<sub>16</sub>H<sub>22</sub>FNO<sub>6</sub>Na<sup>+</sup>: 366.1323; Found: 366.1320.

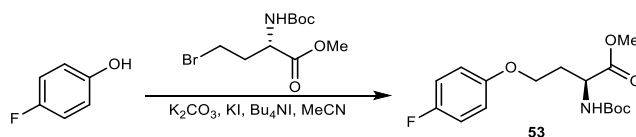

**methyl N-(tert-butoxycarbonyl)-O-(4-fluorophenyl)-L-homoserinate (53).** The title compound was prepared according to the general procedure C from 4-fluorophenol (60 mg, 0.54 mmol, 1.0 equiv.) and methyl (S)-4-bromo-2-((tert-

butoxycarbonyl)amino)butanoate (190 mg, 0.65 mmol, 1.2 equiv.), and obtained as a colourless oil (138 mg, 78.8%).

**<sup>1</sup>H NMR** (400 MHz, Chloroform-*d*)  $\delta$  7.01 – 6.90 (m, 2H), 6.84 – 6.76 (m, 2H), 5.38 – 5.22 (m, 1H), 4.50 (q,  $J$  = 6.6 Hz, 1H), 4.00 (t,  $J$  = 6.0 Hz, 2H), 3.76 (s, 3H), 2.37 – 2.14 (m, 2H), 1.43 (s, 9H).

**<sup>13</sup>C NMR** (100 MHz, Chloroform-*d*)  $\delta$  172.76, 157.42 (d,  $J$  = 238.6 Hz), 155.33, 154.60 (d,  $J$  = 2.2 Hz), 115.82 (d,  $J$  = 23.2 Hz), 115.56 (d,  $J$  = 7.9 Hz), 80.04, 64.73, 52.40, 51.21, 31.83, 28.29.

**<sup>19</sup>F NMR** (376 MHz, Chloroform-*d*)  $\delta$  -123.63.

**HRMS** (ESI)  $m/z$ : [M+Na]<sup>+</sup> Calcd for C<sub>16</sub>H<sub>22</sub>FN<sub>2</sub>O<sub>5</sub>Na<sup>+</sup>: 350.1374; Found: 350.1370.

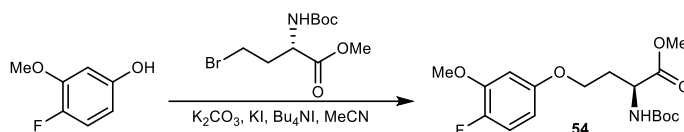

**methyl N-(tert-butoxycarbonyl)-O-(4-fluoro-3-methoxyphenyl)-L-homoserinate (54).** The title compound was prepared according to the general procedure C from 4-fluoro-3-methoxyphenol (76 mg, 0.53 mmol, 1.0 equiv.) and methyl (S)-4-bromo-2-((tert-butoxycarbonyl)amino)butanoate (188 mg, 0.64 mmol, 1.2 equiv.), and obtained as a white foamy solid (152 mg, 79.6%).

**<sup>1</sup>H NMR** (400 MHz, Chloroform-*d*)  $\delta$  6.96 (dd,  $J$  = 11.0, 8.8 Hz, 1H), 6.51 (dd,  $J$  = 7.2, 2.9 Hz, 1H), 6.34 (dt,  $J$  = 8.9, 3.1 Hz, 1H), 5.27 – 5.25 (m, 1H), 4.52 – 4.50 (m, 1H), 4.00 (t,  $J$  = 6.0 Hz, 2H), 3.86 (s, 3H), 3.76 (s, 3H), 2.40 – 2.27 (m, 1H), 2.21 – 2.16 (m, 1H), 1.44 (s, 9H).

**<sup>13</sup>C NMR** (100 MHz, Chloroform-*d*)  $\delta$  172.77, 155.34, 155.02 (d,  $J$  = 2.2 Hz), 148.12 (d,  $J$  = 12.0 Hz), 147.46 (d,  $J$  = 238.2 Hz), 115.73 (d,  $J$  = 19.6 Hz), 104.59 (d,  $J$  = 6.7 Hz), 101.77, 80.07, 64.73, 56.21, 52.42, 51.17, 31.92, 28.29.

**<sup>19</sup>F NMR** (376 MHz, Chloroform-*d*)  $\delta$  -145.08.

**HRMS** (ESI)  $m/z$ : [M+Na]<sup>+</sup> Calcd for C<sub>17</sub>H<sub>24</sub>FN<sub>2</sub>O<sub>6</sub>Na<sup>+</sup>: 380.1480; Found: 380.1477.

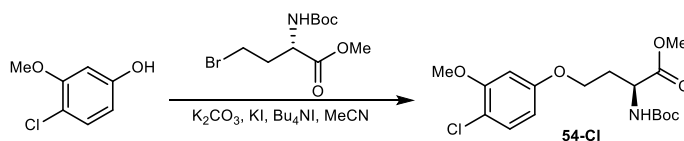

**methyl N-(tert-butoxycarbonyl)-O-(4-chloro-3-methoxyphenyl)-L-homoserinate (54-Cl).** The title compound was prepared according to the general procedure C from 4-chloro-3-methoxyphenol (84 mg, 0.53 mmol, 1.0 equiv.) and methyl (S)-4-bromo-2-((tert-butoxycarbonyl)amino)butanoate (188 mg, 0.64 mmol, 1.2 equiv.), and obtained as a white foamy solid (143 mg, 72.2%).

**<sup>1</sup>H NMR** (400 MHz, Chloroform-*d*)  $\delta$  7.23 (d,  $J$  = 8.7 Hz, 1H), 6.48 (d,  $J$  = 2.6 Hz, 1H), 6.40 (dd,  $J$  = 8.7, 2.7 Hz, 1H), 5.26 – 5.19 (m, 1H), 4.55 – 4.43 (m, 1H), 4.03 (t,  $J$  = 6.0 Hz, 2H), 3.87 (s, 3H), 3.76 (s, 3H), 2.37 – 2.29 (m, 1H), 2.26 – 2.10 (m, 1H), 1.43 (s, 9H).

<sup>13</sup>C NMR (100 MHz, Chloroform-*d*) δ 172.73, 158.35, 155.64, 130.16, 114.54, 105.96, 100.51, 80.13, 64.47, 56.09, 52.45, 51.12, 31.91, 28.29.

HRMS (ESI) *m/z*: [M+Na]<sup>+</sup> Calcd for C<sub>17</sub>H<sub>24</sub>ClNO<sub>6</sub>Na<sup>+</sup>: 396.1184; Found: 396.1182.

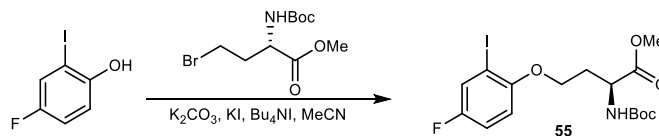

**methyl N-(tert-butoxycarbonyl)-O-(4-fluoro-2-iodophenyl)-L-homoserinate (55).** The title compound was prepared according to the general procedure **C** from 4-fluoro-2-iodophenol (125 mg, 0.53 mmol, 1.0 equiv.) and methyl (S)-4-bromo-2-((tert-butoxycarbonyl)amino)butanoate (188 mg, 0.64 mmol, 1.2 equiv.), and obtained as a colourless oil (172 mg, 72.3%).

<sup>1</sup>H NMR (400 MHz, Chloroform-*d*) δ 7.50 (dd, *J* = 7.6, 3.0 Hz, 1H), 7.01 (ddd, *J* = 9.0, 7.8, 3.1 Hz, 1H), 6.73 (dd, *J* = 9.1, 4.6 Hz, 1H), 5.59 – 5.50 (m, 1H), 4.52 – 4.57 (m, 1H), 4.11 – 4.00 (m, 2H), 3.76 (s, 3H), 2.48 – 2.16 (m, 2H), 1.43 (s, 9H).

<sup>13</sup>C NMR (100 MHz, Chloroform-*d*) δ 172.52, 157.00 (d, *J* = 244.1 Hz), 155.52, 153.86 (d, *J* = 2.6 Hz), 126.16 (d, *J* = 25.1 Hz), 115.65 (d, *J* = 22.6 Hz), 112.29 (d, *J* = 8.3 Hz), 85.88 (d, *J* = 8.0 Hz), 79.97, 66.74, 52.53, 51.75, 31.61, 28.32.

<sup>19</sup>F NMR (376 MHz, Chloroform-*d*) δ -121.61.

HRMS (ESI) *m/z*: [M+Na]<sup>+</sup> Calcd for C<sub>16</sub>H<sub>21</sub>FINO<sub>5</sub>Na<sup>+</sup>: 476.0341; Found: 476.0340.

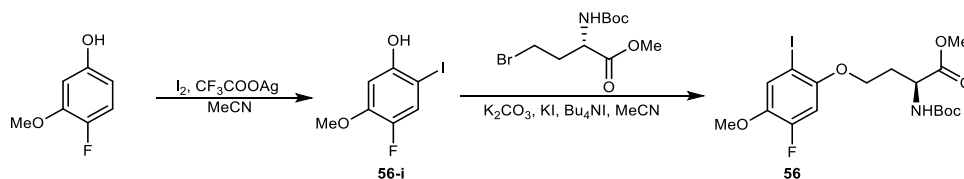

**4-fluoro-2-iodo-5-methoxyphenol(56-i).** To a solution of 4-fluoro-3-methoxyphenol (284 mg, 2.0 mmol, 1.0 equiv.) in MeCN were added I<sub>2</sub> (610 mg, 2.4 mmol, 1.2 equiv.) and CF<sub>3</sub>COOAg (57 mg, 20%). The solution was stirred at room temperature for 36 h and then quenched with saturated Na<sub>2</sub>S<sub>2</sub>O<sub>3</sub> solution. The reaction was extracted with ethyl acetate and water. The organic phase was dried with Na<sub>2</sub>SO<sub>4</sub>, filtered, and concentrated in vacuo to give the crude product, which was purified by silica gel column with PE/EA = 15/1 as the eluant to give the title compound as a white solid (194 mg, 46.8%).

<sup>1</sup>H NMR (400 MHz, Chloroform-*d*) δ 7.31 (d, *J* = 10.2 Hz, 1H), 6.67 (d, *J* = 7.5 Hz, 1H), 5.08 (s, 1H), 3.85 (s, 3H).

<sup>13</sup>C NMR (100 MHz, Chloroform-*d*) δ 151.74 (d, *J* = 2.6 Hz), 149.21 (d, *J* = 11.7 Hz), 146.84 (d, *J* = 243.1 Hz), 123.65 (d, *J* = 22.0 Hz), 100.24 (d, *J* = 1.6 Hz), 70.95 (d, *J* = 7.7 Hz), 56.26.

**methyl N-(tert-butoxycarbonyl)-O-(5-fluoro-2-iodo-4-methoxyphenyl)-L-homoserinate (56).** The title compound was prepared according to the general procedure **C** from compound **56-i** (143 mg, 0.53 mmol, 1.0 equiv.) and methyl (S)-4-bromo-2-((tert-butoxycarbonyl)amino)butanoate (188 mg, 0.64 mmol, 1.2 equiv.) as a brown foamy solid (121 mg, 72.3%).

<sup>1</sup>H NMR (400 MHz, Chloroform-*d*) δ 7.44 (d, *J* = 10.4 Hz, 1H), 6.51 (d, *J* = 7.3 Hz, 1H), 5.65 – 5.47 (m, 1H), 4.64 – 4.476 (m, 1H), 4.13 – 4.00 (m, 2H), 3.88 (s, 3H), 3.77 (s, 3H), 2.45 – 2.37 (m, 1H), 2.31 – 2.16 (m, 1H), 1.44 (s, 9H).

<sup>13</sup>C NMR (100 MHz, Chloroform-*d*) δ 172.53, 155.33, 154.09, 148.36 (d, *J* = 11.6 Hz), 147.42 (d, *J* = 243.8 Hz), 125.60 (d, *J*

= 21.7 Hz), 99.73, 80.01, 73.09 (d,  $J = 7.2$  Hz), 67.11, 56.66, 52.57, 51.67, 31.78, 28.32.

**$^{19}\text{F}$  NMR** (376 MHz, Chloroform- $d$ )  $\delta$  -141.88.

**HRMS** (ESI)  $m/z$ :  $[\text{M}+\text{Na}]^+$  Calcd for  $\text{C}_{17}\text{H}_{23}\text{FINO}_6\text{Na}^+$ : 506.0446; Found: 506.0447.

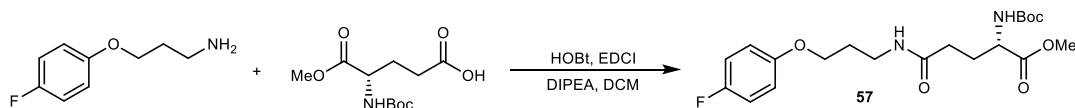

**methyl N2-(tert-butoxycarbonyl)-N5-(3-(4-fluorophenoxy)propyl)-L-glutamate (57).** Following the preparation procedure of compound **32**, the title compound was obtained from (S)-4-((tert-butoxycarbonyl)amino)-5-methoxy-5-oxopentanoic acid (131 mg, 0.50 mmol, 1.0 equiv.) and 3-(4-fluorophenoxy)propan-1-amine (93 mg, 0.55 mmol, 1.1 equiv.) as a white solid (172 mg, 83.5%).

**$^1\text{H}$  NMR** (400 MHz, Chloroform- $d$ )  $\delta$  7.04 – 6.90 (m, 2H), 6.90 – 6.75 (m, 2H), 6.39 (br, 1H), 5.33 (d,  $J = 8.3$  Hz, 1H), 4.28 (td,  $J = 8.9, 4.2$  Hz, 1H), 4.00 (t,  $J = 6.0$  Hz, 2H), 3.73 (s, 3H), 3.46 (qd,  $J = 6.7, 4.7$  Hz, 2H), 2.27 (dd,  $J = 8.1, 6.3$  Hz, 2H), 2.18 (ddd,  $J = 19.2, 10.5, 5.7$  Hz, 1H), 2.00 (p,  $J = 6.4$  Hz, 2H), 1.92 (dd,  $J = 21.8, 7.2$  Hz, 1H), 1.43 (s, 9H).

**$^{13}\text{C}$  NMR** (100 MHz, Chloroform- $d$ )  $\delta$  172.72, 171.97, 157.32 (d,  $J = 238.3$  Hz), 155.89, 154.83 (d,  $J = 2.0$  Hz), 115.95, 115.72, 115.49, 115.41, 80.18, 66.60, 52.93, 52.45, 37.12, 32.68, 29.21, 29.08, 28.28.

**$^{19}\text{F}$  NMR** (376 MHz, Chloroform- $d$ )  $\delta$  -123.85.

**HRMS** (ESI)  $m/z$ :  $[\text{M}+\text{H}]^+$  Calcd for  $\text{C}_{20}\text{H}_{30}\text{FN}_2\text{O}_6^+$ : 413.2082; Found: 413.2079.

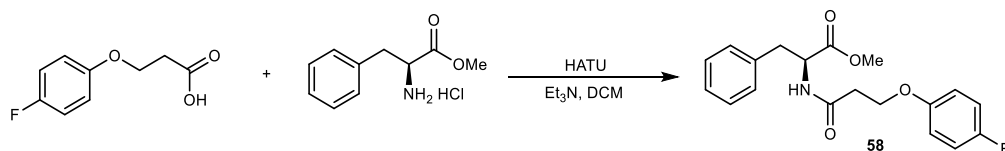

**methyl (3-(4-fluorophenoxy)propanoyl)-L-phenylalaninate (58).** To a solution of 3-(4-fluorophenoxy)propanoic acid (92 mg, 0.50 mmol, 1.0 equiv.) and D-Phenylalanine methyl ester hydrochloride in DCM (5 mL) were added  $\text{Et}_3\text{N}$  (200  $\mu\text{L}$ , 1.5 mmol) and HATU (230 mg, 0.60 mmol, 1.2 equiv.). The reaction was stirred at room temperature for 3h. The solution was then washed with 1M citric acid aqueous solution, saturated  $\text{NaHCO}_3$  solution, water, and saturated NaCl solution, dried over anhydrous sodium sulfate, filtered, and evaporated under reduced pressure. The residue was purified by silica gel column chromatography (PE: EA = 2:1) to yield the title compound as a colourless oil (113 mg, 65.3%).

**$^1\text{H}$  NMR** (400 MHz, Chloroform- $d$ )  $\delta$  7.22 (dd,  $J = 5.0, 1.9$  Hz, 3H), 7.12 – 7.03 (m, 2H), 7.01 – 6.91 (m, 2H), 6.82 – 6.75 (m, 2H), 6.41 (d,  $J = 7.8$  Hz, 1H), 4.95 – 4.90 (m, 1H), 4.20 – 4.12 (m, 2H), 3.73 (s, 3H), 3.23 – 3.04 (m, 2H), 2.65 (dd,  $J = 6.6, 5.4$  Hz, 2H).

**$^{13}\text{C}$  NMR** (100 MHz, Chloroform- $d$ )  $\delta$  171.88, 170.00, 157.56 (d,  $J = 238.9$  Hz), 154.33 (d,  $J = 2.1$  Hz), 135.73, 129.27, 128.54, 127.12, 115.88 (d,  $J = 20.4$  Hz), 115.73 (d,  $J = 5.2$  Hz), 64.70, 53.11, 52.36, 37.81, 36.52.

**<sup>19</sup>F NMR** (376 MHz, Chloroform-*d*)  $\delta$  -123.52.

**HRMS** (ESI) *m/z*: [M+H]<sup>+</sup> Calcd for C<sub>19</sub>H<sub>21</sub>FNO<sub>4</sub><sup>+</sup>: 346.1449; Found: 346.1446.

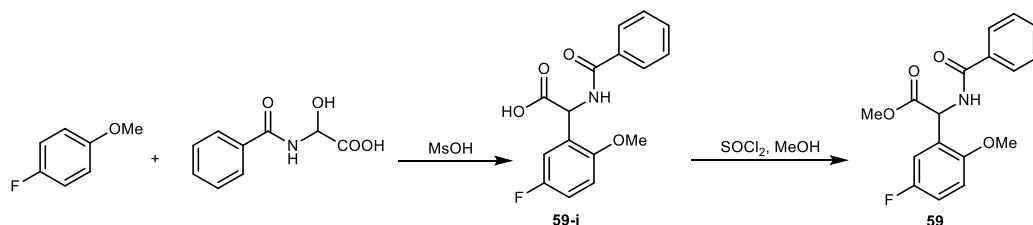

**2-benzamido-2-(5-fluoro-2-methoxyphenyl)acetic acid (59-i)**. 1-fluoro-4-methoxybenzene (969 mg, 17.68 mmol, 1.0 equiv.) and  $\alpha$ -hydroxyhippuric acid (1.5 g, 7.68 mmol) were added to a round bottom flask containing 6 mL methanesulfonic acid at 0 °C. The solution was stirred at room temperature for 1 h and poured into ice water. The precipitate was collected after filtration and washed with water. After drying, the solid (1.82 g, 78.1%) was used for the next step without further purification.

**Methyl 2-benzamido-2-(5-fluoro-2-methoxyphenyl)acetate (59)**. To a solution of **59-i** in MeOH, SOCl<sub>2</sub> was added (265  $\mu$ L, 3.68 mmol, 9.2 equiv.) at 0 °C. The solution was warmed to room temperature and stirred for 24 h. The reaction was quenched by the addition of 1 mL water. After removal of the solvent, the crude product was dissolved in 10 mL DCM and washed with water and saturated NaCl solution, dried over anhydrous sodium sulfate, filtered, and the solvent was evaporated under reduced pressure. The residue was purified by silica gel column chromatography (PE: EA = 5:1) to yield the title compound as a white solid (95 mg, 75.4%).

**<sup>1</sup>H NMR** (400 MHz, Chloroform-*d*)  $\delta$  7.85 – 7.76 (m, 2H), 7.54 – 7.46 (m, 1H), 7.47 – 7.39 (m, 2H), 7.32 (d, *J* = 8.0 Hz, 1H), 7.18 (dd, *J* = 8.3, 3.1 Hz, 1H), 7.00 (ddd, *J* = 8.9, 7.9, 3.1 Hz, 1H), 6.85 (dd, *J* = 9.0, 4.3 Hz, 1H), 5.92 (d, *J* = 8.0 Hz, 1H), 3.85 (s, 3H), 3.74 (s, 3H).

**<sup>13</sup>C NMR** (100 MHz, Chloroform-*d*)  $\delta$  171.11, 166.58, 156.89 (d, *J* = 240.2 Hz), 153.28 (d, *J* = 2.3 Hz), 133.86, 131.78, 128.58, 127.17, 126.92 (d, *J* = 7.2 Hz), 117.58 (d, *J* = 24.0 Hz), 115.73 (d, *J* = 22.8 Hz), 112.20 (d, *J* = 8.0 Hz), 56.32, 53.29 (d, *J* = 1.4 Hz), 52.88.

**<sup>19</sup>F NMR** (376 MHz, Chloroform-*d*)  $\delta$  -122.69.

**HRMS** (ESI) *m/z*: [M+H]<sup>+</sup> Calcd for C<sub>17</sub>H<sub>17</sub>FNO<sub>4</sub><sup>+</sup>: 318.1136; Found: 318.1133.

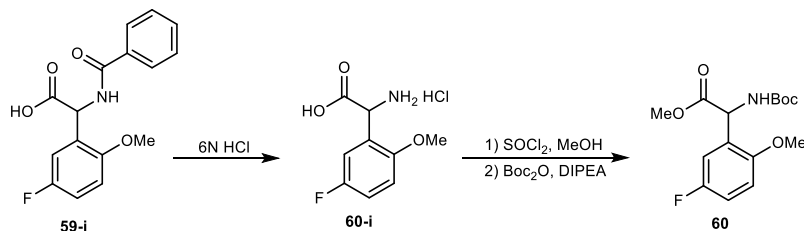

**2-amino-2-(5-fluoro-2-methoxyphenyl)acetic acid hydrochloride (60-i)**. The compound **59-i** (500 mg, 1.65 mmol, 1.0

equiv.) was dissolved in 30 mL 6N HCl. The mixture was stirred under reflux for 24 h. The solution was cooled to temperature and washed with EA. The aqueous solution was concentrated to give the title compound as a white solid (285 mg, 86.9%).

**<sup>1</sup>H NMR** (400 MHz, DMSO-*d*<sub>6</sub>) δ 13.78 (br, 1H), 8.80 (br, 2H), 7.35 (dd, *J* = 9.0, 3.1 Hz, 1H), 7.27 (td, *J* = 8.6, 3.1 Hz, 1H), 7.12 (dd, *J* = 9.1, 4.5 Hz, 1H), 5.14 (s, 1H), 3.80 (s, 3H).

**<sup>13</sup>C NMR** (100 MHz, DMSO-*d*<sub>6</sub>) δ 169.58, 156.24 (d, *J* = 236.7 Hz), 153.87 (d, *J* = 2.0 Hz), 123.33 (d, *J* = 7.9 Hz), 117.46 (d, *J* = 7.8 Hz), 117.23 (d, *J* = 9.9 Hz), 113.53 (d, *J* = 8.2 Hz), 56.87, 51.21.

**<sup>19</sup>F NMR** (376 MHz, DMSO-*d*<sub>6</sub>) δ -123.33.

**methyl 2-((tert-butoxycarbonyl)amino)-2-(5-fluoro-2-methoxyphenyl)acetate (60).** The solution of compound **60-©** was cooled to 0°C, and SOCl<sub>2</sub> (1.0 mL, 13.89 mmol, 9.2 equiv.) was added. The solution was warmed to room temperature and stirred for 24 h. The reaction was quenched with 1 mL water and then concentrated under reduced pressure to give the methyl ester. The intermediate was dissolved in dioxane. DIPEA (657 μL, 3.78 mmol, 2.5 equiv.) and Boc<sub>2</sub>O (395 mg, 1.81 mmol, 1.2 equiv.) were added to the solution. The solution was stirred at room temperature for 2h and diluted with EA. The solution was washed with water and saturated NaCl solution. The organic phase was dried with Na<sub>2</sub>SO<sub>4</sub>, filtered, and concentrated in vacuo to give the crude product, which was purified by silica gel column with PE/EA = 10/1 as the eluant to give the title compound as a white solid (310 mg, 65.5%)

**<sup>1</sup>H NMR** (400 MHz, Chloroform-*d*) δ 7.05 (dd, *J* = 8.4, 3.1 Hz, 1H), 6.98 (ddd, *J* = 9.0, 8.0, 3.1 Hz, 1H), 6.81 (dd, *J* = 9.0, 4.3 Hz, 1H), 5.66 (d, *J* = 8.9 Hz, 1H), 5.44 (d, *J* = 8.8 Hz, 1H), 3.81 (s, 3H), 3.70 (s, 3H), 1.44 (s, 9H).

**<sup>13</sup>C NMR** (100 MHz, Chloroform-*d*) δ 171.40, 156.81 (d, *J* = 239.8 Hz), 155.17, 153.13, 127.38 (d, *J* = 7.1 Hz), 117.09 (d, *J* = 23.7 Hz), 115.48 (d, *J* = 22.8 Hz), 111.96 (d, *J* = 8.0 Hz), 80.11, 56.14, 54.14, 52.69, 28.34.

**<sup>19</sup>F NMR** (376 MHz, Chloroform-*d*) δ -123.03.

**HRMS** (ESI) *m/z*: [M+Na]<sup>+</sup> Calcd for C<sub>15</sub>H<sub>20</sub>FO<sub>5</sub>Na<sup>+</sup>: 336.1218; Found: 336.1214.

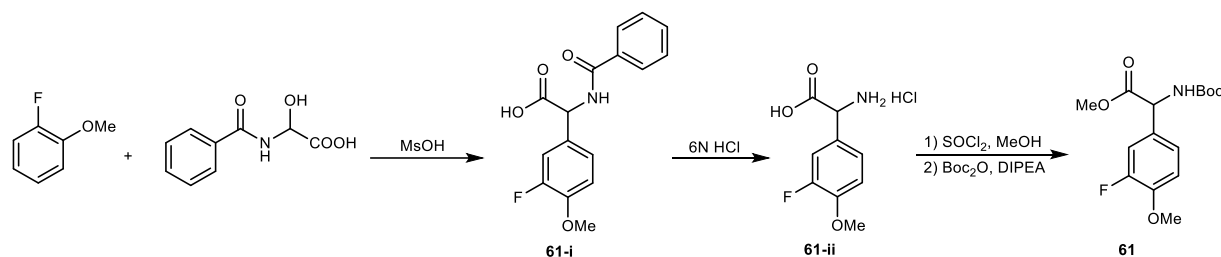

**2-benzamido-2-(3-fluoro-4-methoxyphenyl)acetic acid (61-i).** Following the preparation procedure of compound **59-©**, the title compound was obtained from 1-fluoro-2-methoxybenzene (646 mg, 5.13 mmol, 1.0 equiv.) and α-hydroxyhippuric acid (1.0 g, 5.13 mmol, 1.0 equiv.) as a white solid (1.32 g, 85.2%).

**<sup>1</sup>H NMR** (400 MHz, DMSO-*d*<sub>6</sub>) δ 12.95 (br, 1H), 9.01 (d, *J* = 7.5 Hz, 1H), 7.91 (dt, *J* = 7.1, 1.4 Hz, 2H), 7.58 – 7.51 (m, 1H),

7.47 (dd,  $J = 8.2, 6.7$  Hz, 2H), 7.38 (dd,  $J = 12.6, 2.1$  Hz, 1H), 7.31 – 7.25 (m, 1H), 7.17 (t,  $J = 8.7$  Hz, 1H), 5.57 (d,  $J = 7.5$  Hz, 1H), 3.84 (s, 3H).

$^{13}\text{C}$  NMR (100 MHz, DMSO- $d_6$ )  $\delta$  172.27, 166.73, 151.58 (d,  $J = 243.7$  Hz), 147.29 (d,  $J = 10.5$  Hz), 134.18, 131.98, 1130.38 (d,  $J = 6.3$  Hz), 128.69, 128.13, 125.14 (d,  $J = 3.3$  Hz), 116.08 (d,  $J = 19.0$  Hz), 114.09 (d,  $J = 2.0$  Hz), 56.51, 56.37.

$^{19}\text{F}$  NMR (376 MHz, DMSO- $d_6$ )  $\delta$  -135.37.

**2-amino-2-(3-fluoro-4-methoxyphenyl)acetic acid hydrochloride (61-ii).** Following the preparation procedure of compound **60-I**, the title compound was obtained as a white solid (585 mg, 89.3%).

**Methyl 2-((tert-butoxycarbonyl)amino)-2-(3-fluoro-4-methoxyphenyl)acetate (61).** Following the preparation procedure of compound **60**, the title compound was obtained from **61-ii** as a white solid (415 mg, 87.7%).

$^1\text{H}$  NMR (400 MHz, Chloroform- $d$ )  $\delta$  7.11 (t,  $J = 2.7$  Hz, 1H), 7.08 (d,  $J = 1.2$  Hz, 1H), 6.93 (t,  $J = 8.4$  Hz, 1H), 5.56 (d,  $J = 7.0$  Hz, 1H), 5.24 (d,  $J = 7.3$  Hz, 1H), 3.88 (s, 3H), 3.73 (s, 3H), 1.43 (s, 9H).

$^{13}\text{C}$  NMR (100 MHz, Chloroform- $d$ )  $\delta$  171.35, 154.73, 152.35 (d,  $J = 247.1$  Hz), 147.75 (d,  $J = 10.6$  Hz), 129.91, 123.09, 114.88 (d,  $J = 19.7$  Hz), 113.53 (d,  $J = 2.1$  Hz), 80.31, 56.70, 56.28, 52.82, 28.29.

$^{19}\text{F}$  NMR (376 MHz, Chloroform- $d$ )  $\delta$  -133.94.

HRMS (ESI)  $m/z$ :  $[\text{M}+\text{Na}]^+$  Calcd for  $\text{C}_{15}\text{H}_{20}\text{FNO}_5\text{Na}^+$ : 336.1218; Found: 336.1217.

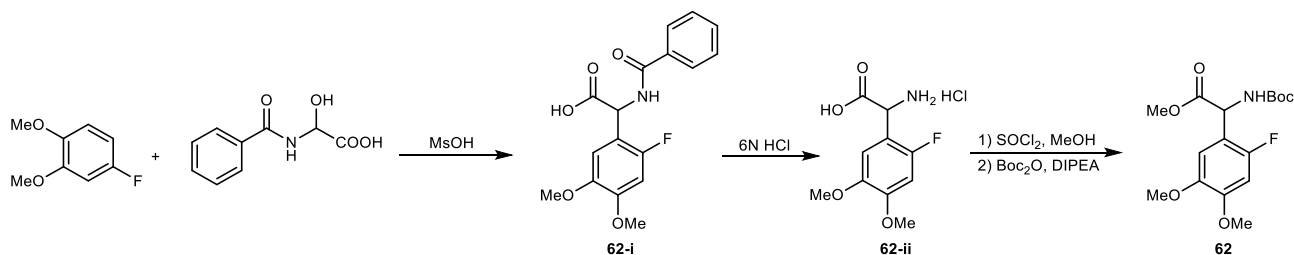

**2-benzamido-2-(2-fluoro-4,5-dimethoxyphenyl)acetic acid (62-i).** Following the preparation procedure of compound **59-©**, the title compound was obtained as a white solid (2.0 g, 47%) from 4-fluoro-1,2-dimethoxybenzene (2.0 g, 12.8 mmol, 1.0 equiv.) and  $\alpha$ -hydroxyhippuric acid (2.5 g, 12.8 mmol, 1.0 equiv.).

**2-amino-2-(2-fluoro-4,5-dimethoxyphenyl)acetic acid hydrochloride (62-ii).** Following the preparation procedure of compound **60-I**, the title compound was obtained as a white solid (200 mg, 29%) from **62-©** (1.0 g, 3.0 mmol).

**Methyl 2-((tert-butoxycarbonyl)amino)-2-(2-fluoro-4,5-dimethoxyphenyl)acetate (62).** Following the preparation procedure of compound **60**, the title compound was obtained as a white solid (84 mg, 39.4%) from **62-ii** (150 mg, 0.65 mmol).

$^1\text{H}$  NMR (400 MHz, Chloroform- $d$ )  $\delta$  6.78 (d,  $J = 6.8$  Hz, 1H), 6.64 (d,  $J = 11.2$  Hz, 1H), 5.57 (d,  $J = 7.6$  Hz, 1H), 5.46 (d,  $J = 7.8$  Hz, 1H), 3.86 (s, 6H), 3.73 (s, 3H), 1.44 (s, 9H).

$^{13}\text{C}$  NMR (101 MHz, Chloroform- $d$ )  $\delta$  171.24, 154.89, 154.69 (d,  $J = 242.0$  Hz), 149.94 (d,  $J = 9.8$  Hz), 145.52, 114.99 (d,  $J = 16.1$  Hz), 111.02, 100.30 (d,  $J = 25.2$  Hz), 80.28, 56.47, 56.18, 52.89, 52.09, 28.30.

$^{19}\text{F}$  NMR (376 MHz, Chloroform- $d$ )  $\delta$  -124.84.



NC(Cc1ccc(F)cc1)C(=O)O>>COC(=O)C(C(=O)Nc1ccc(F)cc1)C(=O)OC

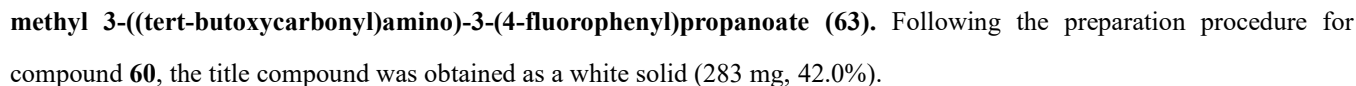

<sup>13</sup>C NMR (100 MHz, Chloroform-*d*) δ 171.27, 162.08 (d, *J* = 245.8 Hz), 154.98, 127.79 (d, *J* = 8.1 Hz), 115.49 (d, *J* = 21.5 Hz), 79.89, 51.83, 50.61, 40.71, 28.33

**HRMS** (ESI) *m/z*: [M+Na]<sup>+</sup> Calcd for C<sub>15</sub>H<sub>20</sub>FNO<sub>4</sub>Na<sup>+</sup>: 320.1269; Found: 320.1265.

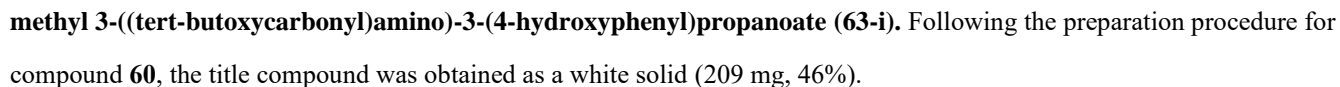

**<sup>13</sup>C NMR** (100 MHz, Chloroform-*d*) δ 171.72, 155.56, 155.36, 132.49, 127.27, 115.53, 80.12, 51.87, 50.88, 40.95, 28.38.

**methyl 3-((tert-butoxycarbonyl)amino)-3-(4-(4-chlorophenoxy)phenyl)propanoate (63-deo).** To a solution of compound **63-©** (102 mg, 0.35 mmol) in 30 mL DCM, p-chlorophenylboronic acid (110 mg, 0.70 mmol), copper acetate (84 mg, 0.42 mmol) and triethylamine (53 mg, 0.53 mmol) were added. The reaction was stirred under room temperature overnight. 30 mL of water was added to the reaction, and the solution was extracted with DCM. The organic layer was washed with saturated brine and dried with anhydrous sodium sulfate, filtered and concentrated to give the residue, which was then separated and refined by silica gel column chromatography (petroleum ether: ethyl acetate =10:1) to give the title compound as a colourless oil (44 mg, 31.0%).

**<sup>1</sup>H NMR** (400 MHz, Chloroform-*d*)  $\delta$  7.31 – 7.25 (m, 4H), 7.00 – 6.85 (m, 4H), 5.47 (s, 1H), 5.08 (s, 1H), 3.63 (s, 3H), 2.84 (qd,  $J$  = 15.4, 6.2 Hz, 2H), 1.43 (s, 9H).

$^{13}\text{C}$  NMR (100 MHz, Chloroform-*d*)  $\delta$  171.36, 156.25, 155.73, 155.03, 129.75, 128.39, 127.68, 120.17, 118.89, 51.84, 29.71, 28.36.

HRMS (ESI)  $m/z$ :  $[\text{M}+\text{Na}]^+$  Calcd for  $\text{C}_{21}\text{H}_{24}\text{ClNO}_5\text{Na}^+$ : 428.1235; Found: 428.1234.

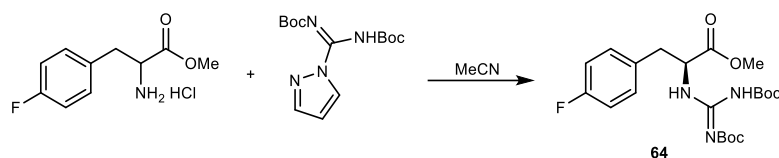

**methyl (S,Z)-2-(2,3-bis(tert-butoxycarbonyl)guanidino)-3-(4-fluorophenyl)propanoate (64).** To a solution of Methyl 2-amino-3-(4-fluorophenyl)propanoate hydrochloride (233 mg, 1.00 mmol, 1.0 equiv.) and N,N'-Di-Boc-1H-pyrazole-1-carboximidamide (341 mg, 1.10 mmol, 1.1 equiv.) in MeCN (10 ml) was added  $\text{K}_2\text{CO}_3$  (345 mg, 2.50 mmol, 1.5 equiv.). The solution was stirred at room temperature for 24 h and then quenched by the addition of water (20 ml). The reaction was extracted with ethyl acetate. The organic layers were combined and washed with saturated sodium chloride aqueous solution, dried over anhydrous sodium sulfate, filtered, and evaporated under reduced pressure. The residue was purified by silica gel column chromatography (PE: EA = 15:1) to obtain the title compound as a white solid (153 mg, 34.8%).

$^1\text{H}$  NMR (400 MHz, Chloroform-*d*)  $\delta$  11.37 (s, 1H), 8.77 (d,  $J = 7.5$  Hz, 1H), 7.18 – 7.07 (m, 2H), 7.04 – 6.91 (m, 2H), 5.06 (dt,  $J = 7.5, 5.9$  Hz, 1H), 3.71 (s, 3H), 3.22 – 3.03 (m, 2H), 1.49 (s, 18H).

$^{13}\text{C}$  NMR (100 MHz, Chloroform-*d*)  $\delta$  171.46, 163.28, 162.06 (d,  $J = 246.0$  Hz), 155.40, 152.79, 131.58 (d,  $J = 3.3$  Hz), 130.97, 130.89, 115.44, 115.23, 83.34, 79.37, 54.51, 52.33, 37.27, 28.27, 28.01.

$^{19}\text{F}$  NMR (376 MHz, Chloroform-*d*)  $\delta$  -115.83.

HRMS (ESI): Calculated for  $\text{C}_{21}\text{H}_{31}\text{FN}_3\text{O}_6\text{Na}^+$   $[\text{M}+\text{H}]^+$ : 440.2191 Found: 440.2186.

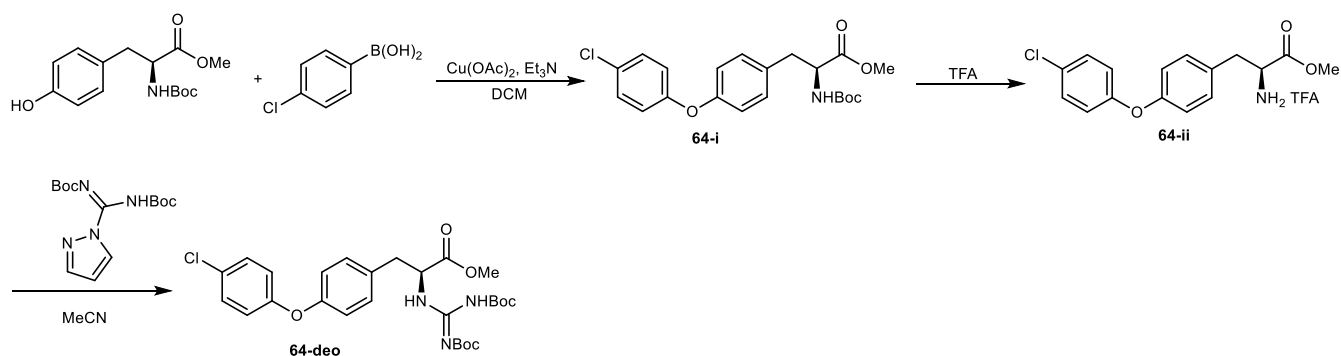

**methyl (S)-2-((tert-butoxycarbonyl)amino)-3-(4-(4-chlorophenoxy)phenyl)propanoate (64-i).** To a solution of Boc-*L*-Tyrosine methyl ester (1.2 g, 4.07 mmol, 1.0 equiv.) and (4-chlorophenyl)boronic acid (699 mg, 4.48 mmol, 1.1 equiv.) were added  $\text{Cu}(\text{OAc})_2$  (896 mg, 4.48 mmol, 1.1 equiv.) and  $\text{Et}_3\text{N}$  (847  $\mu\text{l}$ , 6.11 mmol, 1.5 equiv.). The solution was stirred at room temperature for 24h and then quenched by the addition of 1M citric acid (40 mL). The reaction was extracted with dichloromethane. The organic layers were combined and washed with saturated sodium chloride aqueous solution, dried over

anhydrous sodium sulfate, filtered, and evaporated under reduced pressure. The residue was purified by silica gel column chromatography (PE: EA = 15:1) to obtain the title compound as a white solid (396 mg, 24%).

**<sup>1</sup>H NMR** (400 MHz, Chloroform-*d*)  $\delta$  7.31 – 7.24 (m, 2H), 7.13 – 7.06 (m, 2H), 6.95 – 6.89 (m, 4H), 5.01 (d, *J* = 8.4 Hz, 1H), 4.58 (q, *J* = 6.6 Hz, 1H), 3.73 (s, 3H), 3.11 (dd, *J* = 13.9, 5.6 Hz, 1H), 3.01 (dd, *J* = 13.9, 6.3 Hz, 1H), 1.42 (s, 9H).

**<sup>13</sup>C NMR** (100 MHz, Chloroform-*d*)  $\delta$  172.28, 155.97, 155.87, 155.05, 131.33, 130.74, 129.73, 128.28, 120.07, 118.92, 80.00, 54.46, 52.28, 37.74, 28.31.

**methyl (S)-2-amino-3-(4-(4-chlorophenoxy)phenyl)propanoate trifluoroacetic acid (64-ii).** To a solution of **64-©** (320 mg, 0.79 mmol) in DCM, TFA (2 ml) was added. The solution was stirred at room temperature for 5h. After removing the solvent, the crude product was used in the next step without further purification.

**Methyl(S,Z)-2-(2,3-bis(tert-butoxycarbonyl)guanidino)-3-(4-(4-chlorophenoxy)phenyl)propanoate (64).** To a solution of **64-ii** (331 mg, 0.79 mmol, 1.0 equiv.) and N,N'-Di-Boc-1H-pyrazole-1-carboximidamide (269 mg, 0.87 mmol, 1.1 equiv.) in MeCN (10 mL) were added K<sub>2</sub>CO<sub>3</sub> (275 mg, 1.98 mmol, 2.5 equiv.). The solution was stirred at room temperature for 24h and then quenched by the addition of water (20 ml). The reaction was extracted with ethyl acetate. The organic layers were combined and washed with saturated sodium chloride aqueous solution, dried over anhydrous sodium sulfate, filtered, and evaporated under reduced pressure. The residue was purified by silica gel column chromatography (PE: EA = 15:1) to obtain the title compound as a white solid (353 mg, 81.5%).

**<sup>1</sup>H NMR** (400 MHz, Chloroform-*d*)  $\delta$  11.38 (s, 1H), 8.76 (d, *J* = 7.5 Hz, 1H), 7.30 – 7.24 (m, 2H), 7.16 – 7.08 (m, 2H), 6.96 – 6.86 (m, 4H), 5.07 (dt, *J* = 7.6, 5.9 Hz, 1H), 3.72 (s, 3H), 3.24 – 3.04 (m, 2H), 1.49 (s, 9H), 1.48 (s, 9H).

**<sup>13</sup>C NMR** (100 MHz, Chloroform-*d*)  $\delta$  171.56, 163.31, 156.00, 155.93, 155.45, 152.80, 131.15, 130.90, 129.69, 128.14, 119.95, 118.97, 83.30, 79.37, 54.50, 52.33, 37.27, 28.28, 28.02.

**HRMS** (ESI) *m/z*: [M+H]<sup>+</sup> Calcd for C<sub>27</sub>H<sub>35</sub>ClN<sub>3</sub>O<sub>7</sub><sup>+</sup>: 548.2158; Found: 548.2162.

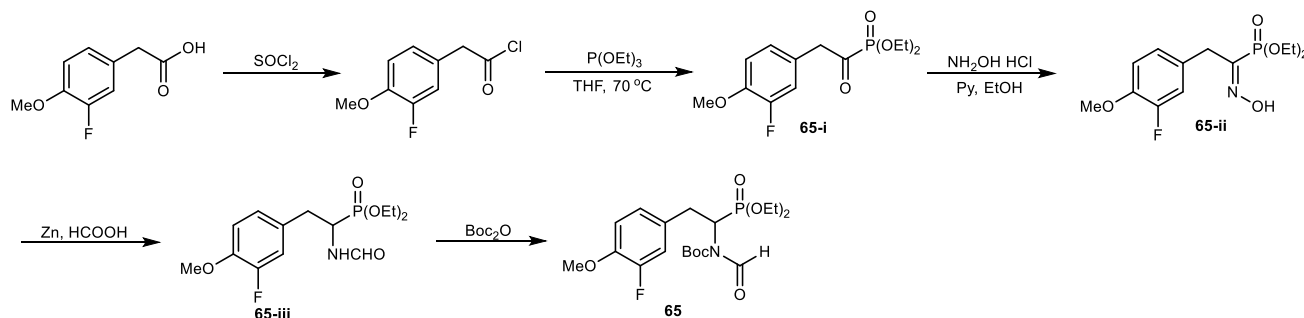

**tert-butyl (1-(diethoxyphosphoryl)-2-(3-fluoro-4-methoxyphenyl)ethyl)(formyl)carbamate (65).** The title compound was prepared according to a modified literature procedure<sup>[5]</sup>. 2-(3-fluoro-4-methoxyphenyl)acetic acid (0.92 g, 5 mmol) was dissolved in thionyl chloride (10 mL) and refluxed for 2 h. The reaction mixture was concentrated in vacuo to give the crude phenylacetyl chloride as a yellow liquid which was dissolved in dry tetrahydrofuran (10 mL) and cooled to 0 °C. Triethyl phosphite (0.83 g, 5 mmol) was then added dropwise. Then, the mixture was stirred at 70 °C for 30 min. The resulting solution

was concentrated to remove volatile compounds. The crude  $\alpha$ -keto phosphonate and hydroxylamine hydrochloride (0.42 g, 6 mmol) were added to the mixture of dry pyridine (1 mL) and dry ethanol (10 mL). The mixture was stirred at room temperature for 12 h and then concentrated in vacuo. The crude product was dissolved in dichloromethane (30 mL) and washed with 2 N HCl ( $3 \times 10$  mL) and water (10 mL). The organic layer was dried with anhydrous  $\text{MgSO}_4$ , filtered, and concentrated to obtain the crude oxime. Finally, the crude oxime was added to a suspension of zinc (1.3 g, 20 mmol) in anhydrous formic acid (10 mL), and the mixture was refluxed overnight under nitrogen. The suspension was filtered, and the filtrate was concentrated. The crude formamide was dissolved in THF (10 mL), and to it was added  $\text{Boc}_2\text{O}$  (1.9 g, 5 mmol). The mixture was stirred under reflux for 4 h and cooled to room temperature. The solvent was removed under reduced pressure, and the residue was purified by flash chromatography using DCM/MeOH (20:1) to give the title compound (mixture of 2 rotamers) as a yellow oil (360 mg, 17% yield).

$^1\text{H}$  NMR (400 MHz,  $\text{CDCl}_3$ )  $\delta$  9.1 (s, 0.32H), 8.95 (s, 0.57H), 6.91 – 6.80 (m, 3H), 5.09 (ddd,  $J = 20.4, 11.3, 5.6$  Hz, 0.58H), 4.89 – 4.72 (m, 0.42H), 4.37 – 4.01 (m, 4H), 3.84 (s, 3H), 3.33 (dt,  $J = 13.8, 11.1$  Hz, 1H), 3.11 (dd,  $J = 28.3, 13.8$  Hz, 1H), 1.36 – 1.29 (m, 9H).

$^{19}\text{F}$  NMR (100 MHz,  $\text{CDCl}_3$ ):  $\delta$  -135.29 (m).

HRMS (ESI)  $m/z$ :  $[\text{M}+\text{Na}]^+$  Calcd for  $\text{C}_{19}\text{H}_{29}\text{FNO}_7\text{Pna}^+$ : 456.1558; Found: 456.1559.

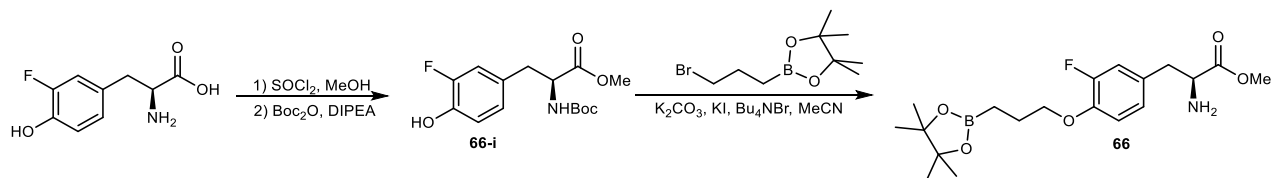

**methyl (S)-2-amino-3-(3-fluoro-4-hydroxyphenyl)propanoate hydrochloride (66-i).** Following the preparation procedure of compound **60**, the title compound was obtained from 3-fluoro-*L*-tyrosine (120 mg, 0.6 mmol, 1.0 equiv.) as a white solid (135 mg, 90.6%).

**Methyl (S)-2-((tert-butoxycarbonyl)amino)-3-(3-fluoro-4-hydroxyphenyl)propanoate (66-i).** Following the preparation procedure of compound **60**, the title compound was obtained from 3-fluoro-*L*-tyrosine as a white solid (89 mg, 83.9%).

$^1\text{H}$  NMR (400 MHz, Chloroform-*d*)  $\delta$  6.90 (t,  $J = 8.6$  Hz, 1H), 6.85 (dd,  $J = 11.4, 2.1$  Hz, 1H), 6.78 (dd,  $J = 8.7, 2.1$  Hz, 1H), 5.30 (br, 1H), 5.00 (d,  $J = 8.3$  Hz, 1H), 4.54 (q,  $J = 6.5$  Hz, 1H), 3.72 (s, 3H), 3.10 – 2.82 (m, 2H), 1.43 (s, 9H).

**Methyl(S)-2-amino-3-(3-fluoro-4-(3-(4,4,5,5-tetramethyl-1,3,2-dioxaborolan-2-yl)propoxy)phenyl)propanoate (66).** The title compound was prepared according to the general procedure **C** from **66-i** (80 mg, 0.26 mmol, 1.0 equiv.) and 2-(3-bromopropyl)-4,4,5,5-tetramethyl-1,3,2-dioxaborolane (78 mg, 0.31 mmol, 1.2 equiv.), and obtained as a colorless oil (65 mg, 52.0%).

$^1\text{H}$  NMR (400 MHz, Chloroform-*d*)  $\delta$  6.89 (t,  $J = 8.4$  Hz, 1H), 6.86 – 6.75 (m, 2H), 4.98 (d,  $J = 8.3$  Hz, 1H), 4.53 (q,  $J = 6.6$  Hz, 1H), 3.98 (t,  $J = 6.8$  Hz, 2H), 3.72 (s, 3H), 3.00 (qd,  $J = 14.0, 5.8$  Hz, 2H), 1.98 – 1.86 (m, 2H), 1.42 (s, 9H), 1.25 (s, 12H), 0.92 (t,  $J = 7.8$  Hz, 2H).

$^{13}\text{C}$  NMR (100 MHz, Chloroform-*d*)  $\delta$  172.17, 155.04, 152.46 (d,  $J$  = 246.0 Hz), 146.19 (d,  $J$  = 10.9 Hz), 128.71 (d,  $J$  = 6.2 Hz), 124.88, 117.02 (d,  $J$  = 18.5 Hz), 114.94 (d,  $J$  = 2.3 Hz), 83.13, 80.01, 71.05, 54.39, 52.27, 37.40, 28.29, 24.83, 23.70, 7.00.

$^{19}\text{F}$  NMR (376 MHz, Chloroform-*d*)  $\delta$  -134.19.

HRMS (ESI)  $m/z$ :  $[\text{M}+\text{Na}]^+$  Calcd for  $\text{C}_{24}\text{H}_{37}\text{BFNO}_7\text{Na}^+$ : 504.2539; Found: 504.2541.

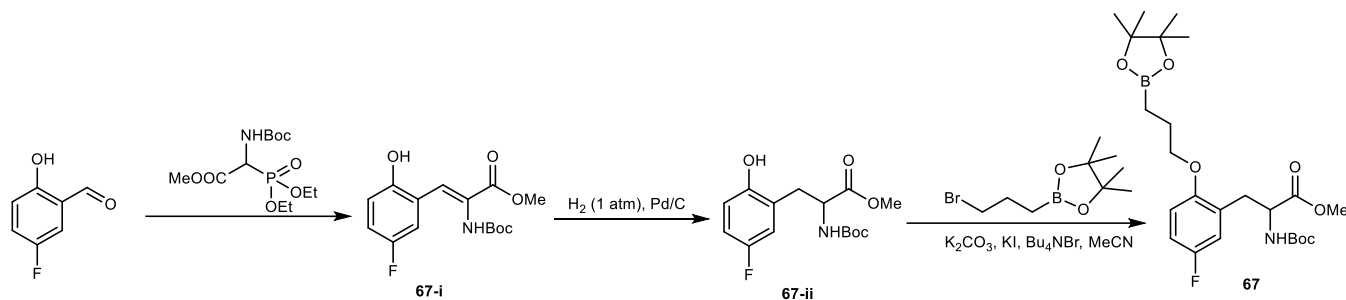

**methyl 2-((tert-butoxycarbonyl)amino)-3-(5-fluoro-2-(3-(4,4,5,5-tetramethyl-1,3,2-dioxaborolan-2-yl)propoxy)phenyl)propanoate (67).** Following the preparation procedure of compound **66**, the title compound was obtained from compound **67-ii** (120 mg, 0.38 mmol, 1.0 equiv.) and 2-(3-bromopropyl)-4,4,5,5-tetramethyl-1,3,2-dioxaborolane (115 mg, 0.46 mmol, 1.2 equiv.) as a white solid (85 mg, 46.4%).

$^1\text{H}$  NMR (400 MHz, Chloroform-*d*)  $\delta$  6.87 (td,  $J$  = 8.4, 3.1 Hz, 1H), 6.82 (dd,  $J$  = 8.8, 3.1 Hz, 1H), 6.78 (dd,  $J$  = 8.9, 4.5 Hz, 1H), 5.40 (d,  $J$  = 7.9 Hz, 1H), 4.48 (td,  $J$  = 8.0, 4.8 Hz, 1H), 3.93 (q,  $J$  = 7.3 Hz, 2H), 3.71 (s, 3H), 3.11 (dd,  $J$  = 13.6, 4.9 Hz, 1H), 2.96 (dd,  $J$  = 13.6, 8.2 Hz, 1H), 1.98 – 1.88 (m, 2H), 1.39 (s, 9H), 1.25 (s, 12H), 0.97 – 0.88 (m, 2H).

$^{13}\text{C}$  NMR (100 MHz, Chloroform-*d*)  $\delta$  172.56, 156.68 (d,  $J$  = 238.5 Hz), 155.26, 153.17, 126.75 (d,  $J$  = 7.2 Hz), 117.68 (d,  $J$  = 23.1 Hz), 114.09 (d,  $J$  = 22.8 Hz), 112.22 (d,  $J$  = 8.2 Hz), 83.17, 79.62, 70.49, 54.24, 52.13, 32.80, 28.27, 24.85, 23.67, 7.21.

$^{19}\text{F}$  NMR (376 MHz, Chloroform-*d*)  $\delta$  -124.25.

HRMS (ESI)  $m/z$ :  $[\text{M}+\text{Na}]^+$  Calcd for  $\text{C}_{24}\text{H}_{37}\text{BFNO}_7\text{Na}^+$ : 504.2539; Found: 504.2542.

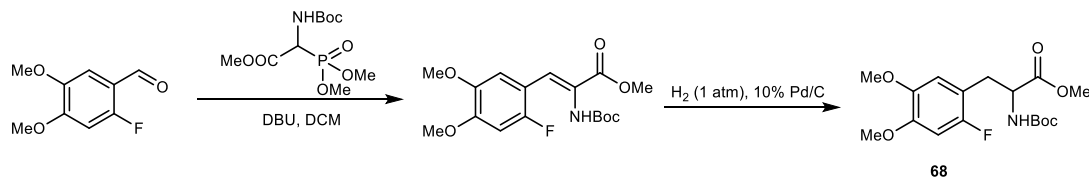

**methyl 2-((tert-butoxycarbonyl)amino)-3-(2-fluoro-4,5-dimethoxyphenyl)propanoate (68).** The title compound was prepared according to the reported procedure. The spectra data matched the reported literature<sup>[6]</sup>.

$^1\text{H}$  NMR (400 MHz, Chloroform-*d*)  $\delta$  6.63 – 6.35 (m, 2H), 4.99 (d,  $J$  = 8.3 Hz, 1H), 4.47 (q,  $J$  = 6.8 Hz, 1H), 3.77 (d,  $J$  = 3.4 Hz, 6H), 3.66 (s, 3H), 2.99 (qd,  $J$  = 14.0, 6.1 Hz, 2H), 1.34 (s, 9H).

### 3. Radiolabeling experiments

### 3.1 Reagents and equipment information

All chemicals are analytical grade and used without further purification.  $^{18}\text{F}$  was produced in an HM-10 cyclotron (Sumitomo Heavy Industries, Ltd., Japan) *via*  $^{18}\text{O}(\text{p}, \text{n})$   $^{18}\text{F}$  nuclear reaction. Sep-PAK® light QMA cartridges, Alumina N Cartridges, and Sep-Pak light C18 Cartridges were purchased from Waters. KT-101 anion exchange resins were purchased from Huayi Isotopes (<https://nucmedcor.com/sup18supf-separation-cartridge-pshco3>). Photocatalyst **S1** was purchased from Acme Biochemical and used directly. Tetrabutylammonium bicarbonate MeCN solution was prepared according to the reported procedure<sup>[6]</sup>. Analytic grades of solvents used for the  $^{18}\text{F}$ -labeling reaction were purchased and used as received. Acetonitrile (MeCN) was purchased from Chron Chemicals; dichloroethane (DCE) was purchased from Aladdin Biochemical; tert-butyl alcohol (t-BuOH) was purchased from J&K Scientific; dichloromethane (DCM) was purchased from Titan Sci. Tetrabutylammonium perchlorate (TBAP) was purchased from Sigma-Aldrich. The solid TBAP salt was dissolved in MeCN to obtain a solution (0.1mg/μl) for labeling reactions (0.1mg/μl), and 30 μl of the solution (3 mg TBAP) was used to prepare the eluent for the full-batch labeling reaction.

The blue LED lamp (A160WE TUNA BLUE) was purchased from Kessil, and the irradiation wavelengths observed are centered around 456 nm. The automatic radiosynthesis module (AllinOne 4530) and  $^{18}\text{F}$ -FDOPA production cassette were purchased from Trasis. The LED reactor (ProBox, Model No. PR486-450) was purchased from LED RADIOFLUIDICS.  $^{18}\text{F}$  activity was counted using a CRC-25 PET detector. High-performance liquid chromatography (HPLC) was accomplished on an Agilent chromatography system (Model 1260), collecting a radiation detector (Bioscan flow-count FC3200).

### 3.2 General procedure for anion-exchange resin preconditioning

The anion-exchange resin (KT-101,  $\text{HCO}_3^-$ ) was washed with 10 ml water and then directly used for the  $^{18}\text{F}^-$  capture, or the resin was washed with 10 ml 1M basic solution ( $\text{K}_2\text{CO}_3$  or  $\text{K}_3\text{PO}_4$  or  $\text{K}_2\text{HPO}_4$ ) and followed by 10 ml water.

### 3.3. Preparation of azeotropic drying-free $^{18}\text{F}^-$ solution

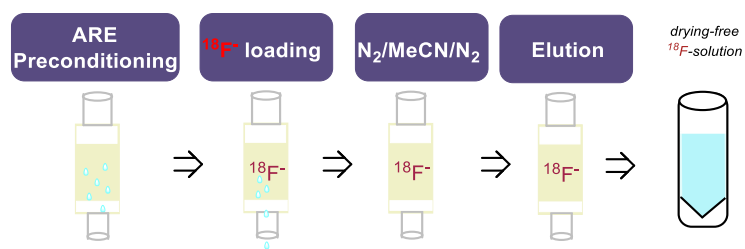

**Supplementary Figure 1.** Illustration of azeotropic drying-free  $^{18}\text{F}^-$  solution preparation

The aqueous  $^{18}\text{F}^-$  solution produced by the cyclotron was loaded on a preconditioned anion-exchange resin (KT-101). After the loading, the resin was flushed under  $\text{N}_2$  flow for 10 seconds to remove most of the water, then washed with 5 ml MeCN and flushed with  $\text{N}_2$  for another 5 min. The  $^{18}\text{F}^-$  was then eluted in a 5 ml v-vial with eluents listed in Supplementary Table 1 to provide the azeotropic drying-free  $^{18}\text{F}^-$  solution for labelling (Supplementary Figure 1). The  $^{18}\text{F}^-$  eluted in the v-vial and left on the resin were recorded to calculate the elution efficiency.

### 3.4 Aryl $^{18}\text{F}$ -fluorination optimization with a portion of the drying-free $^{18}\text{F}^-$ solution

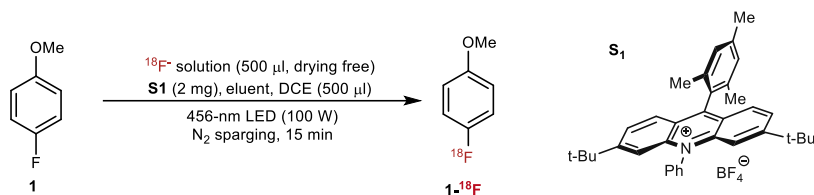

Fluoro-4-methoxybenzene (2  $\mu\text{L}$ ), photocatalyst **S1** (2 mg), were dissolved in 1,2-dichloroethane (DCE, 500  $\mu\text{L}$ ) in a 5 ml v-vial. The drying-free  $^{18}\text{F}^-$  solution (500  $\mu\text{L}$ ) obtained at section 3.3 was added into the reaction v-vial, which was then irradiated with a 456-nm LED light for 15 min under an  $\text{N}_2$  balloon sparging. After dilution with 1 ml MeCN, an aliquot of the reaction solution was analysed on a radio-HPLC to obtain the RCC with a basic mobile phase to avoid the unconverted  $^{18}\text{F}$ -fluoride being trapped on the C18 HPLC column. The  $^{18}\text{F}$ -eluted in the v-vial and left on the resin were recorded to calculate the elution efficiency (Supplementary Table 1).

| Entry             | AER-formation                         | eluent                            |                                |              | EE (%) | RCC (%)                 |
|-------------------|---------------------------------------|-----------------------------------|--------------------------------|--------------|--------|-------------------------|
|                   |                                       | solvent (0.5 ml)                  | base                           | salt         |        |                         |
| 1                 | Sep-Pak Light QMA- $\text{CO}_3^{2-}$ | $^t\text{BuOH}$                   | TBAB (20%, 20 $\mu\text{L}$ )  | none         | -      | -                       |
| 2                 | <b>KT-101</b> - $\text{HCO}_3^-$      | $^t\text{BuOH}/\text{MeCN}$ (4/1) | TBAB (20%, 20 $\mu\text{L}$ )  | none         | 65     | $61.8 \pm 5.2$ (n = 3)  |
| 3                 | <b>KT-101</b> - $\text{HCO}_3^-$      | $\text{EtOH}/\text{MeCN}$ (4/1)   | TBAB (20%, 20 $\mu\text{L}$ )  | none         | 75     | 31.8                    |
| 4                 | <b>KT-101</b> - $\text{HCO}_3^-$      | $^t\text{BuOH}/\text{MeCN}$ (4/1) | TBAB (20%, 20 $\mu\text{L}$ )  | TBAP (5 mg)  | 82     | $63.1 \pm 7.2$ (n = 3)  |
| 5                 | <b>KT-101</b> - $\text{HCO}_3^-$      | $^t\text{BuOH}/\text{MeCN}$ (4/1) | TBAOH (20%, 20 $\mu\text{L}$ ) | none         | 66     | $70.4 \pm 12.9$ (n = 3) |
| 6                 | <b>KT-101</b> - $\text{HCO}_3^-$      | $^t\text{BuOH}/\text{MeCN}$ (1/1) | TBAOH (20%, 20 $\mu\text{L}$ ) | none         | 60     | $75.0 \pm 0.2$ (n = 3)  |
| 7                 | <b>KT-101</b> - $\text{HCO}_3^-$      | $^t\text{BuOH}/\text{MeCN}$ (4/1) | TBAOH (40%, 10 $\mu\text{L}$ ) | none         | 78     | $72.0 \pm 1.7$ (n = 3)  |
| 8                 | <b>KT-101</b> - $\text{HCO}_3^-$      | $^t\text{BuOH}/\text{MeCN}$ (4/1) | TBAOH (40%, 10 $\mu\text{L}$ ) | TBAP (3 mg)  | 88     | $75.6 \pm 4.6$ (n = 3)  |
| 9 <sup>a</sup>    | <b>KT-101</b> - $\text{HCO}_3^-$      | $^t\text{BuOH}/\text{MeCN}$ (4/1) | TBAOH (40%, 10 $\mu\text{L}$ ) | TBAP (2 mg)  | 99.5   | 78                      |
| 10 <sup>a</sup>   | <b>KT-101</b> - $\text{HCO}_3^-$      | $^t\text{BuOH}/\text{MeCN}$ (4/1) | TBAOH (40%, 4 $\mu\text{L}$ )  | TBAP (5 mg)  | 99.3   | 68                      |
| 11 <sup>a</sup>   | <b>KT-101</b> - $\text{HCO}_3^-$      | $^t\text{BuOH}/\text{MeCN}$ (4/1) | none                           | TBAP (10 mg) | 98.8   | 68                      |
| 12 <sup>a,b</sup> |                                       |                                   |                                |              |        | 39                      |
| 13 <sup>a,c</sup> |                                       |                                   |                                |              |        | Trace                   |
| 14 <sup>a,d</sup> | <b>KT-101</b> - $\text{HCO}_3^-$      | $^t\text{BuOH}/\text{MeCN}$ (4/1) | none                           | TBAP (10 mg) | 97%    | 25                      |
| 15 <sup>a,e</sup> |                                       |                                   |                                |              |        | 61                      |

Aryl  $^{18}\text{F}$ -fluorination conditions:  $^{18}\text{F}$  (0.19 -1.11 GBq), substrate **1** (2  $\mu\text{L}$ ), photocatalyst **S1** (2 mg), DCE (500  $\mu\text{L}$ ), 456-nm LED, rt, 15-min irradiation,  $\text{N}_2$  atmosphere. 500  $\mu\text{L}$  drying-free  $^{18}\text{F}^-$  solution was used for each reaction. All RCCs were calculated by HPLC integration with a basic mobile phase to avoid the unconverted  $^{18}\text{F}^-$  fluoride being trapped on the C18 HPLC column. <sup>a</sup>The AER was slowly eluted with the eluent in 1 min. <sup>b</sup>MeCN (500  $\mu\text{L}$ ) was used as the solvent. <sup>c</sup>DMF (500  $\mu\text{L}$ ) was used as the solvent. <sup>d</sup>Ethyl acetate (500  $\mu\text{L}$ ) was used as the solvent. <sup>e</sup>DCM (600  $\mu\text{L}$ ) was used as the solvent.

**Supplementary Table 1.** Drying-free aryl  $^{18}\text{F}$ -fluorination development and optimization

### 3.5 Full-batch aryl $^{18}\text{F}$ -fluorination optimization.

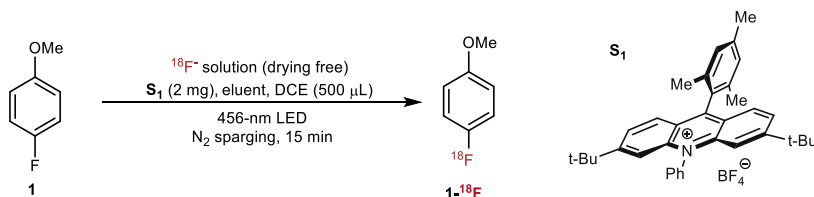

With different kinds of eluents listed in the Supplementary Table 2, the  $^{18}\text{F}$ -trapped on the preconditioned anion-exchange resin (KT-101) was directly eluted in a 5 ml v-vial preloaded with 1-fluoro-4-methoxybenzene **1** (2  $\mu\text{L}$ ) and photocatalyst **S1** (2 mg) in 0.5 ml 1,2-dichloroethane. The solution was irradiated with a 456-nm LED light for 15 min under a nitrogen balloon sparging.

After dilution with 1 ml MeCN, an aliquot of the reaction solution was analysed on a radio-HPLC to obtain the RCC with a basic mobile phase to avoid the unconverted  $^{18}\text{F}$ -fluoride being trapped on the C18 HPLC column. The  $^{18}\text{F}^-$  eluted in the v-vial and left on the resin were recorded to calculate the elution efficiency (Supplementary Table 2)

| entry             | AER-formation                                 | eluent                             |                                             |                    | EE (%)                                 | RCC (%)                                  |
|-------------------|-----------------------------------------------|------------------------------------|---------------------------------------------|--------------------|----------------------------------------|------------------------------------------|
|                   |                                               | solvent (2.5 ml)                   | base                                        | salt               |                                        |                                          |
| 1                 | <b>KT-101</b> -HCO <sub>3</sub> <sup>-</sup>  | <sup>t</sup> BuOH/MeCN (4/1)       | TBAOH (40%, 2 $\mu\text{L}$ )               | TBAP (1 mg)        | 47 $\pm$ 0.82 (n = 3)                  | 56.7 $\pm$ 7.6 (n = 3)                   |
| 2                 | <b>KT-101</b> -HCO <sub>3</sub> <sup>-</sup>  | <sup>t</sup> BuOH/MeCN (4/1)       | TBAOH (40%, 2 $\mu\text{L}$ )               | TBAT (1 mg)        | 54                                     | 59                                       |
| 3                 | <b>KT-101</b> -HCO <sub>3</sub> <sup>-</sup>  | <sup>t</sup> BuOH/MeCN (4/1)       | TBAOH (40%, 4 $\mu\text{L}$ )               | none               | 35                                     | 62                                       |
| 4                 | <b>KT-101</b> -HCO <sub>3</sub> <sup>-</sup>  | <sup>t</sup> BuOH/MeCN (4/1)       | TBAOH (40%, 4 $\mu\text{L}$ )               | TBAP (1 mg)        | 37                                     | 66                                       |
| 5                 | <b>KT-101</b> -HCO <sub>3</sub> <sup>-</sup>  | <sup>t</sup> BuOH/MeCN (4/1)       | TBAOH (1M MeOH solution, 10 $\mu\text{L}$ ) | none               | 56                                     | 53                                       |
| 6                 | <b>KT-101</b> -HCO <sub>3</sub> <sup>-</sup>  | <sup>t</sup> BuOH/MeCN (4/1)       | TPAOH (40%, 4 $\mu\text{L}$ )               | none               | 40.5                                   | 57                                       |
| 7 <sup>a</sup>    | <b>KT-101</b> -HCO <sub>3</sub> <sup>-</sup>  | <sup>t</sup> BuOH/MeCN (4/1)       | none                                        | TBAP (3 mg)        | 81 $\pm$ 4.3 (n = 3)                   | 56.3 $\pm$ 3.3 (n = 3)                   |
| 8 <sup>a</sup>    | <b>KT-101</b> -CO <sub>3</sub> <sup>2-</sup>  | <sup>t</sup> BuOH/MeCN (4/1)       | none                                        | TBAP (3 mg)        | 90.5 $\pm$ 1.1 (n = 3)                 | 60.3 $\pm$ 6.6 (n = 3)                   |
| 9 <sup>a</sup>    | <b>KT-101</b> -PO <sub>4</sub> <sup>3-</sup>  | <sup>t</sup> BuOH/MeCN (4/1)       | none                                        | TBAP (3 mg)        | 76.7 $\pm$ 8.7 (n = 10)                | 71.2 $\pm$ 3.5 (n = 10)                  |
| 10 <sup>a</sup>   | <b>KT-101</b> -HPO <sub>4</sub> <sup>2-</sup> | <b><sup>t</sup>BuOH/MeCN (4/1)</b> | <b>none</b>                                 | <b>TBAP (3 mg)</b> | <b>96 <math>\pm</math> 1.7 (n = 9)</b> | <b>66.9 <math>\pm</math> 4.8 (n = 9)</b> |
| 11 <sup>a,b</sup> | <b>KT-101</b> -HPO <sub>4</sub> <sup>2-</sup> | <sup>t</sup> BuOH/MeCN (4/1)       | none                                        | TBAP (3 mg)        | 92.3 $\pm$ 1.2 (n = 3)                 | 73 $\pm$ 1.1 (n = 3)                     |
| 12 <sup>a,c</sup> | <b>KT-101</b> -HPO <sub>4</sub> <sup>2-</sup> | <sup>t</sup> BuOH/MeCN (4/1)       | none                                        | TBAP (3 mg)        | 98                                     | 66.7                                     |

Aryl  $^{18}\text{F}$ -fluorination conditions:  $^{18}\text{F}$  (0.19 -1.11 GBq), substrate **1** (2  $\mu\text{L}$ ), photocatalyst **S1** (2 mg), DCE (500  $\mu\text{L}$ ), 456-nm LED, rt, 15-min irradiation, N<sub>2</sub> atmosphere. All RCCs were calculated by HPLC integration with a basic mobile phase to avoid the unconverted  $^{18}\text{F}^-$  fluoride being trapped on the C18 HPLC column. <sup>a</sup>The AER was slowly eluted with the eluent in 1 min. <sup>b</sup>used AER. <sup>c</sup>DCM (600  $\mu\text{L}$ ) was used instead of DCE.

**Supplementary Table 2.** Full-batch azeotropic drying-free aryl  $^{18}\text{F}$ -fluorination optimization

### 3.6 General HPLC conditions

General HPLC conditions for crude reaction analysis and radiochemical conversion (RCC) calculation.

Column A: Agilent ZORBAX SB-C18 column (5  $\mu\text{m}$ , 4.6  $\times$  250 mm). Column B: Phenomenex Gemini® C18 110Å column (5  $\mu\text{m}$ , 4.6  $\times$  250 mm). Solvent A: Phosphate buffer (pH = 8); Solvent B: Acetonitrile. Isocratic elution at 20% to 70 % solvent B. Flow rate: 1 ml/min. The phosphate buffer was prepared by mixing K<sub>2</sub>HPO<sub>4</sub> · 3H<sub>2</sub>O (7.332 g) and KH<sub>2</sub>PO<sub>4</sub> (0.41 g) in 1L water. All the radiochemical reactions were subjected to radio-HPLC using this general HPLC condition with column A unless otherwise noted.

### 3.7 Preparation of standard eluent

The optimized eluent (tBuOH-MeCN-TBAP) for the full-batch photoredox-catalysed aryl  $^{18}\text{F}$ -labelling reaction was prepared by mixing 400  $\mu\text{L}$  tBuOH, 100  $\mu\text{L}$  MeCN and 30  $\mu\text{L}$  of the TBAP MeCN solution (0.1 mg/  $\mu\text{L}$ ).

### 3.8 General procedure for the photoredox-mediated azeotropic drying-free aryl $^{18}\text{F}$ -fluorination.

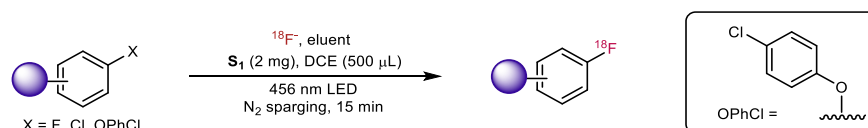

The aqueous  $^{18}\text{F}^-$  solution (0.19 – 3.7 GBq) produced by the cyclotron was loaded on an anion-exchange resin (KT-101) preconditioned with 10 ml K<sub>2</sub>HPO<sub>4</sub> (1 M) and 10 ml water. The resin was flushed under N<sub>2</sub> flow for 10 seconds to remove most of the water, then washed with 5 ml MeCN and flushed with N<sub>2</sub> for another 5 min. With the eluent prepared at section 3.7, the



$^{18}\text{F}^-$  was slowly eluted in a 5 ml v-vial preloaded with aryl substrates (0.01 mmol, unless otherwise noted), photocatalyst **S**<sub>1</sub> (2 mg), and 1,2-dichloroethane (0.5 ml) for around 1 minute. The solution was irradiated with a 456-nm LED light for 15 min under a nitrogen balloon sparging. After dilution with 1 ml MeCN, an aliquot of the reaction solution was analysed on a radio-HPLC to obtain the RCC with a basic mobile phase (pH = 8) to avoid the unconverted  $^{18}\text{F}$ -fluoride being trapped on the C18 HPLC column. The  $^{18}\text{F}^-$  eluted in the v-vial and left on the resin were recorded to calculate the elution efficiency. Co-injection or comparison of the  $^{19}\text{F}$  standard with the labelling crude via HPLC was used to confirm the identity of the radiolabeled compounds.

### 3.9 Radio-HPLC analysis and RCC calculation of the $^{18}\text{F}$ -radiolabeled arenes

All  $^{18}\text{F}$ -labelling reactions were performed according to the general procedure in section 3.8 unless otherwise noted. The elution efficiency (EE) which was calculated by division of the  $^{18}\text{F}^-$  eluted in the reaction v-vial by the whole  $^{18}\text{F}^-$  ( $^{18}\text{F}^-$  in the v-vial and  $^{18}\text{F}^-$  left on the resin), HPLC analysis condition, RCC, copy of the HPLC traces and integration information were listed for each substrate. All  $^{18}\text{F}$ -labelling reactions were analysed according to the general HPLC conditions listed in Section 3.6. Crude radio and UV (210 nm) HPLC traces were listed. The black HPLC traces represent the radio signal. The blue HPLC traces were obtained with a UV signal at 210 nm. For all the labelling reactions, the trapping efficiencies are >97%.

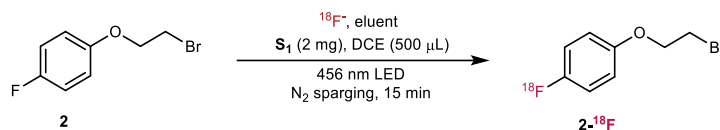

| Substrate | Product                             | Elution efficiency (EE)       | HPLC analysis conditions | RCC |
|-----------|-------------------------------------|-------------------------------|--------------------------|-----|
| <b>2</b>  | <b>2-<math>^{18}\text{F}</math></b> | 8.9 mCi/(8.9 + 0.3) mCi = 97% | 60% MeCN                 | 42% |

**Supplementary Table 3.** Elution efficiency and RCC calculation of **2- $^{18}\text{F}$**

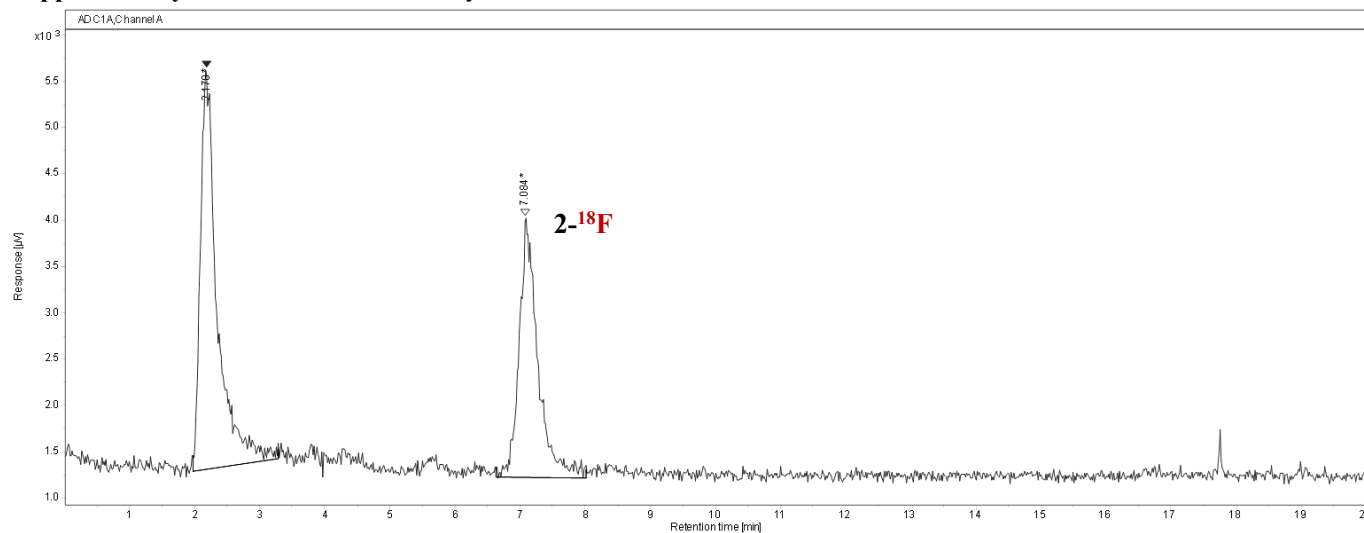

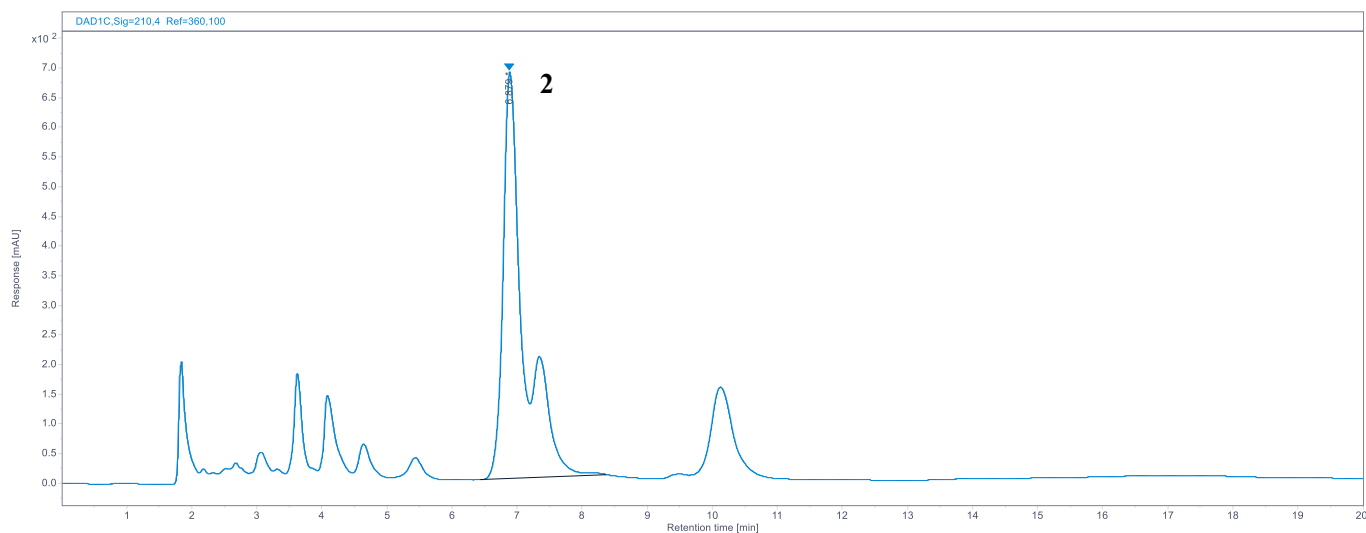

| # | RT (min) | Area (μV·s) | Area%         | Height   | Height% | Start time (min) | End time (min) |
|---|----------|-------------|---------------|----------|---------|------------------|----------------|
| 1 | 2.178    | 77624.558   | 58.147        | 4327.269 | 60.66   | 1.973            | 3.282          |
| 2 | 7.084    | 55872.088   | <b>41.853</b> | 2806.295 | 39.34   | 6.637            | 8.014          |

**Supplementary Figure 2.** Radio-HPLC analysis of **2-<sup>18</sup>F**

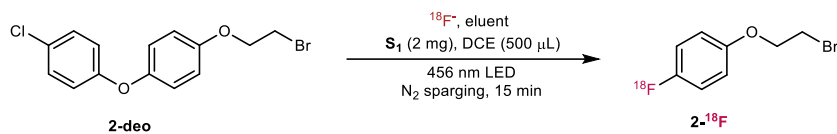

| Substrate    | Product                 | Elution efficiency (EE)         | HPLC analysis conditions | RCC              |
|--------------|-------------------------|---------------------------------|--------------------------|------------------|
| <b>2-deo</b> | <b>2-<sup>18</sup>F</b> | 5.45 mCi/(5.45 + 0.28) mCi= 95% | 60% MeCN                 | 78% <sup>a</sup> |

**Supplementary Table 4.** Elution efficiency and RCC calculation of **2-<sup>18</sup>F** from **2-deo**. a.0.02 mmol substrate.

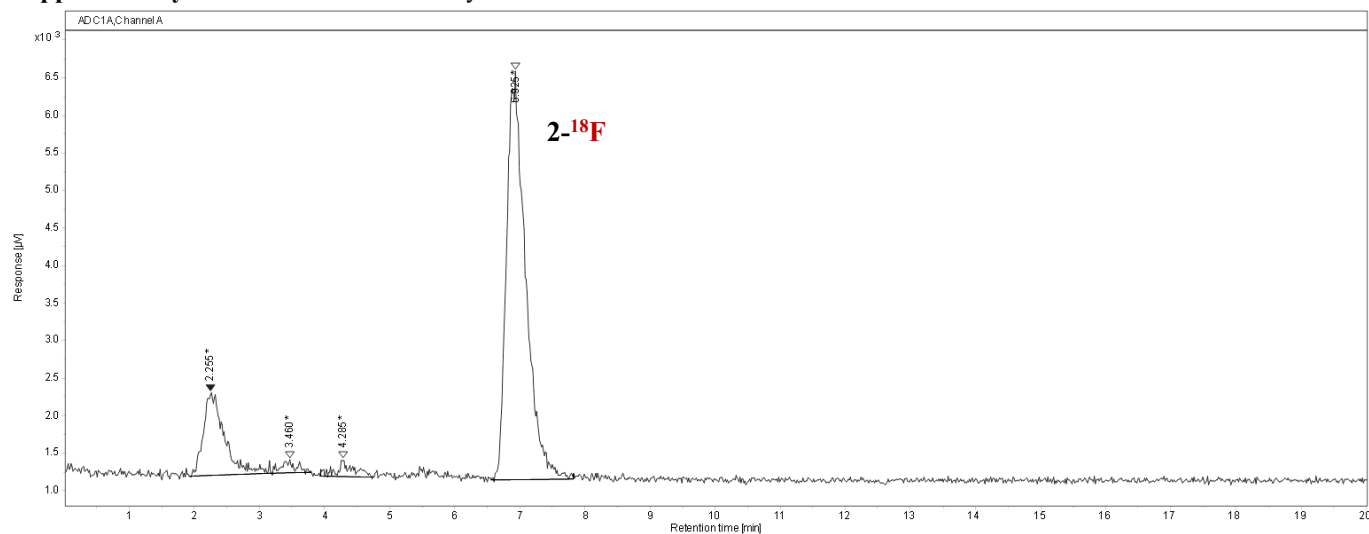

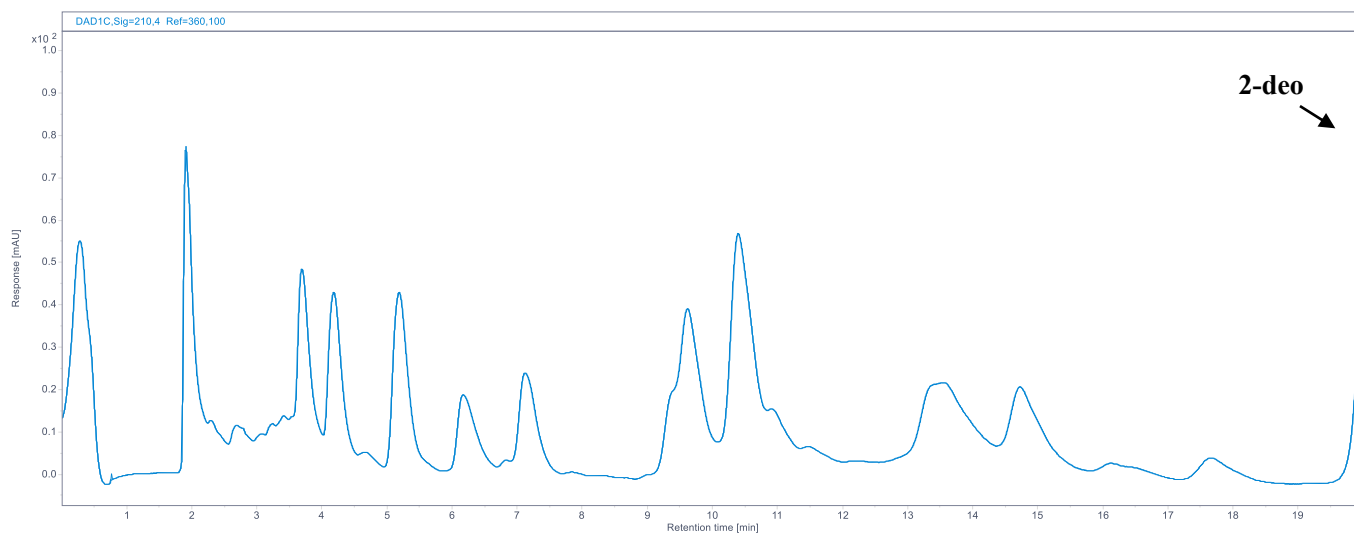

| # | RT (min) | Area (μV·s) | Area%         | Height   | Height% | Start time (min) | End time (min) |
|---|----------|-------------|---------------|----------|---------|------------------|----------------|
| 1 | 2.255    | 24936.265   | 17.602        | 1103.443 | 15.90   | 1.927            | 3.182          |
| 2 | 3.460    | 2455.481    | 1.733         | 171.086  | 2.47    | 3.182            | 3.800          |
| 3 | 4.285    | 3525.850    | 2.489         | 218.735  | 3.15    | 3.941            | 4.751          |
| 4 | 6.925    | 110746.154  | <b>78.175</b> | 5446.464 | 78.48   | 6.558            | 7.819          |

**Supplementary Figure 3. Radio-HPLC analysis of 2-<sup>18</sup>F**

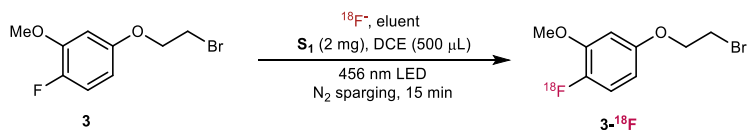

| Substrate | Product                 | Elution efficiency (EE)         | HPLC analysis conditions | RCC |
|-----------|-------------------------|---------------------------------|--------------------------|-----|
| <b>3</b>  | <b>3-<sup>18</sup>F</b> | 6.78 mCi/(6.78 + 0.2) mCi = 97% | 60% MeCN                 | 65% |

**Supplementary Table 5. Elution efficiency and RCC calculation of 3-<sup>18</sup>F.**

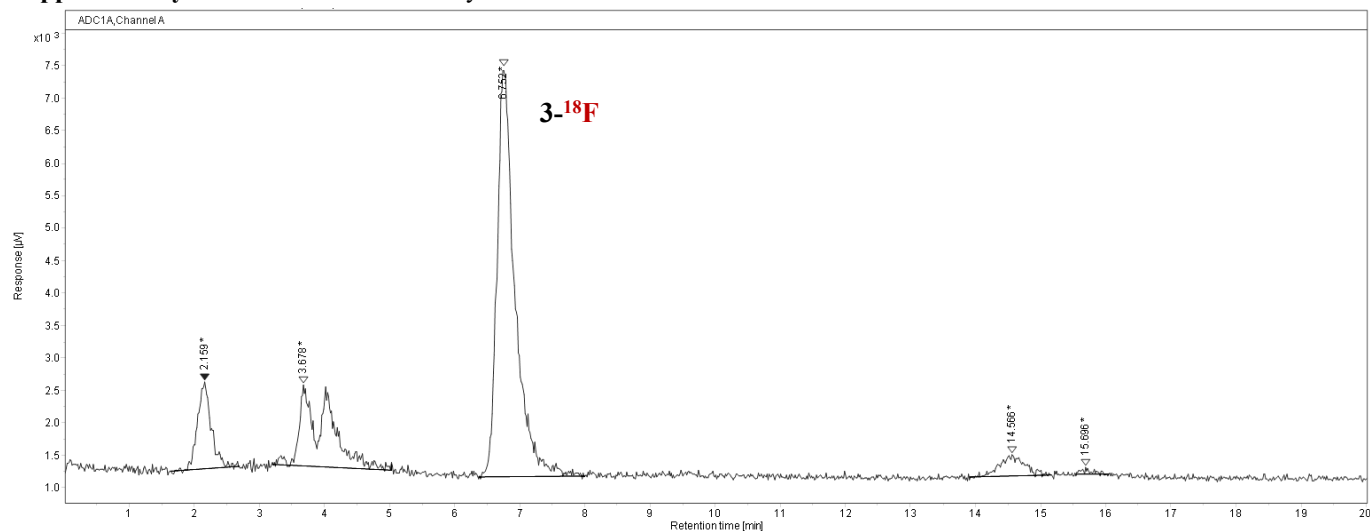

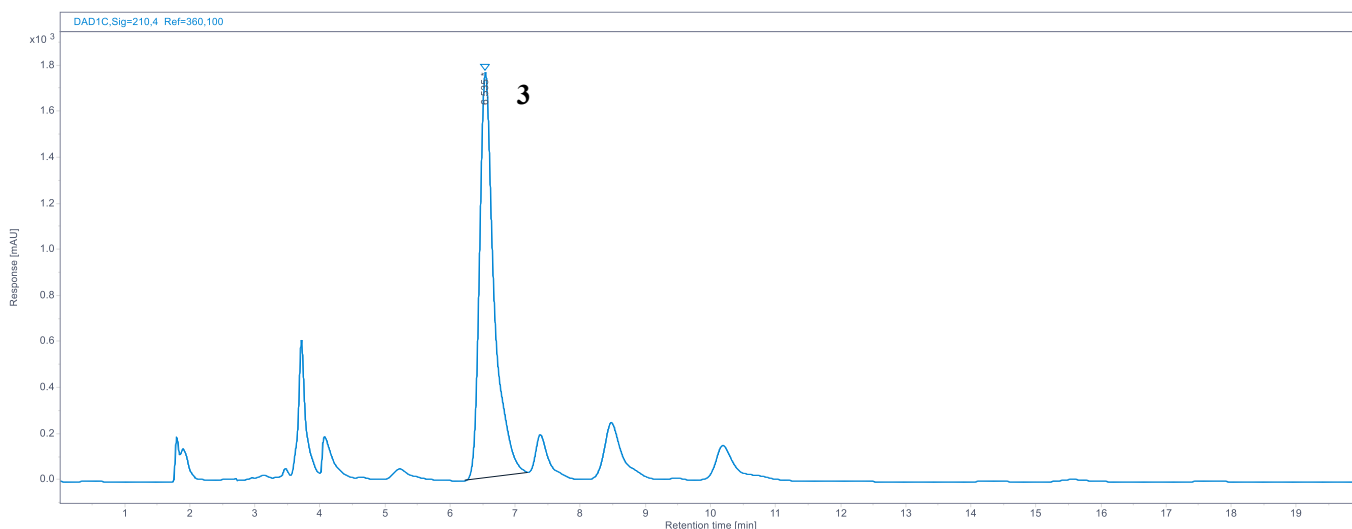

| # | RT (min) | Area (μV·s) | Area%         | Height   | Height% | Start time (min) | End time (min) |
|---|----------|-------------|---------------|----------|---------|------------------|----------------|
| 1 | 2.159    | 19794.517   | 10.649        | 1336.218 | 14.36   | 1.641            | 2.692          |
| 2 | 3.678    | 37302.848   | 20.068        | 1242.002 | 13.35   | 3.203            | 5.036          |
| 3 | 6.752    | 119925.627  | <b>64.516</b> | 6295.510 | 67.68   | 6.371            | 8.005          |
| 4 | 14.566   | 7874.177    | 4.236         | 320.342  | 3.44    | 13.901           | 15.151         |
| 5 | 15.696   | 987.089     | 0.531         | 107.874  | 1.16    | 15.535           | 16.046         |

**Supplementary Figure 4.** Radio-HPLC analysis of **3-<sup>18</sup>F**

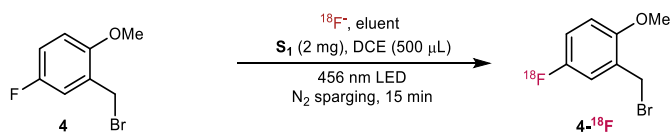

| Substrate | Product                 | Elution efficiency (EE)          | HPLC analysis conditions | RCC |
|-----------|-------------------------|----------------------------------|--------------------------|-----|
| <b>4</b>  | <b>4-<sup>18</sup>F</b> | 9.04 mCi/(9.04 + 0.44) mCi = 97% | 60% MeCN                 | 31% |

**Supplementary Table 6.** Elution efficiency and RCC calculation of **4-<sup>18</sup>F**.

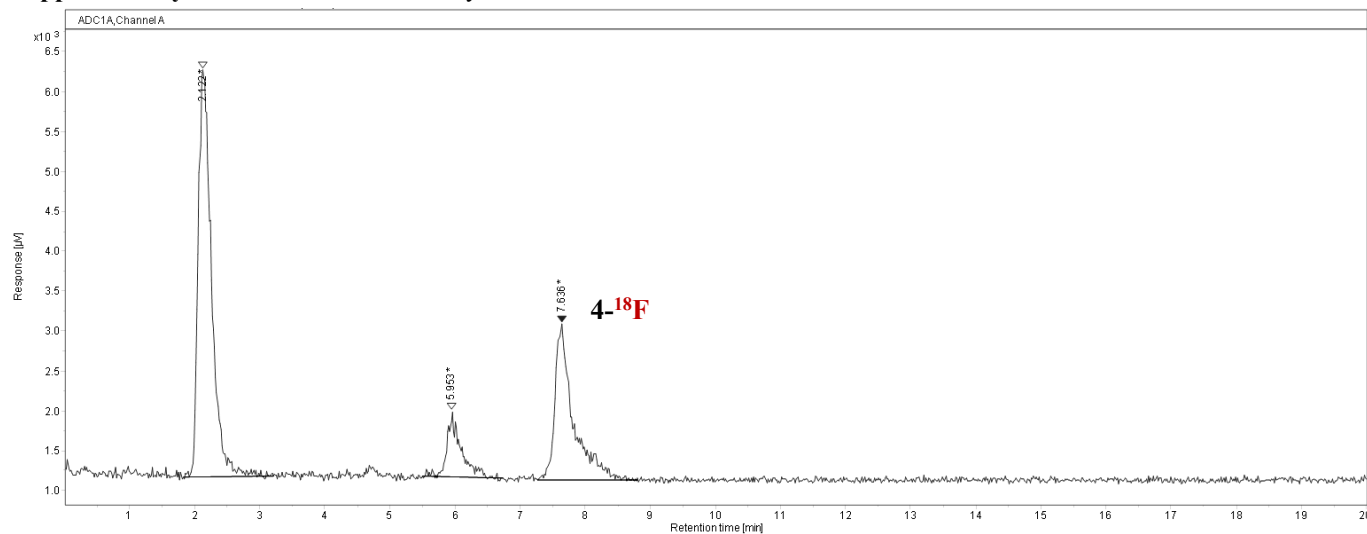

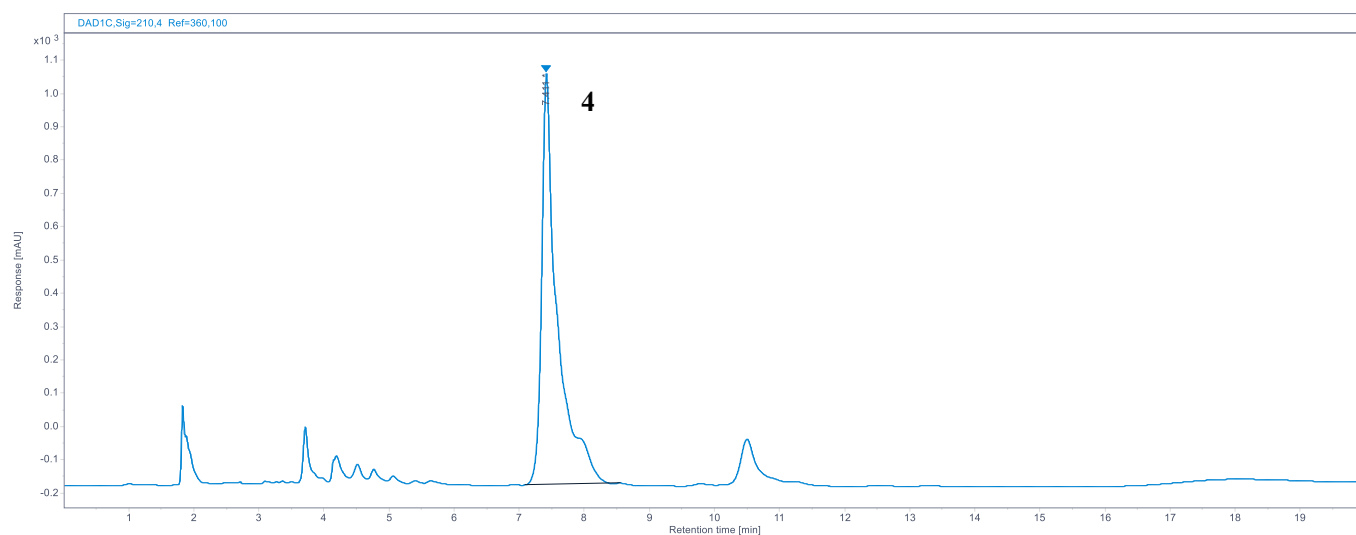

| # | RT (min) | Area (μV·s) | Area%         | Height   | Height% | Start time (min) | End time (min) |
|---|----------|-------------|---------------|----------|---------|------------------|----------------|
| 1 | 2.122    | 72932.867   | 59.225        | 5102.921 | 64.74   | 1.843            | 3.205          |
| 2 | 5.953    | 12073.636   | 9.804         | 823.738  | 10.45   | 5.507            | 6.729          |
| 3 | 7.636    | 38138.396   | <b>30.970</b> | 1955.954 | 24.81   | 7.269            | 8.795          |

**Supplementary Figure 5.** Radio-HPLC analysis of 4-<sup>18</sup>F

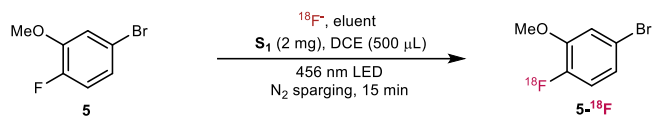

| Substrate | Product                 | Elution efficiency (EE)        | HPLC analysis conditions | RCC |
|-----------|-------------------------|--------------------------------|--------------------------|-----|
| 5         | <b>5-<sup>18</sup>F</b> | 6.0 mCi/(6.0 + 0.22) mCi = 96% | 60% MeCN                 | 22% |

**Supplementary Table 7.** Elution efficiency and RCC calculation of **5-<sup>18</sup>F**.

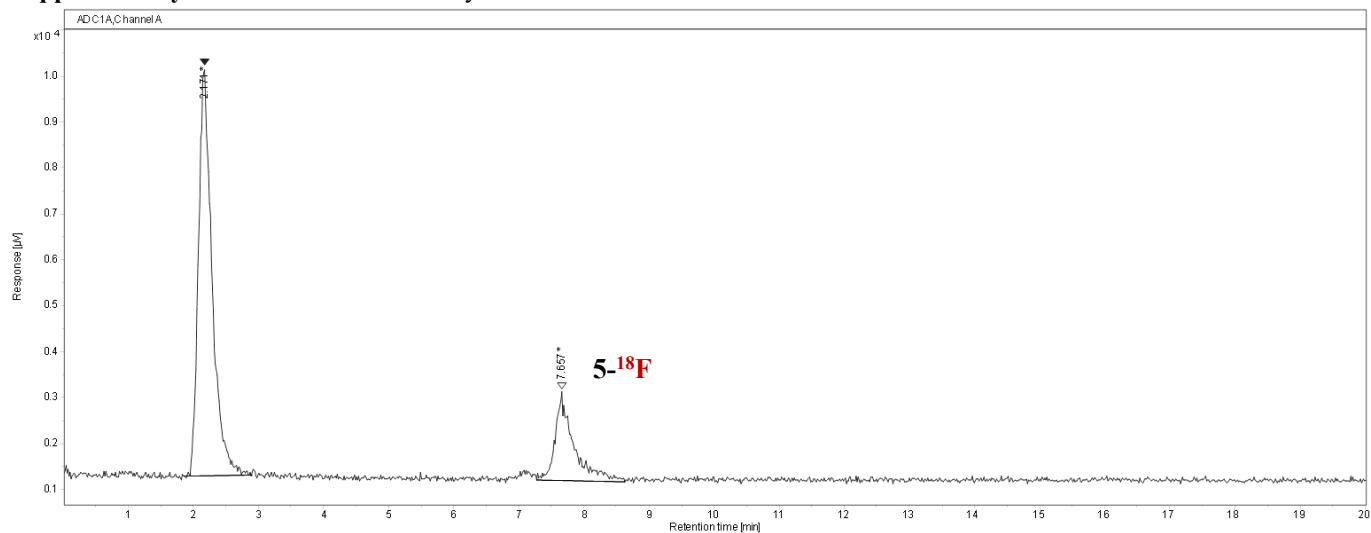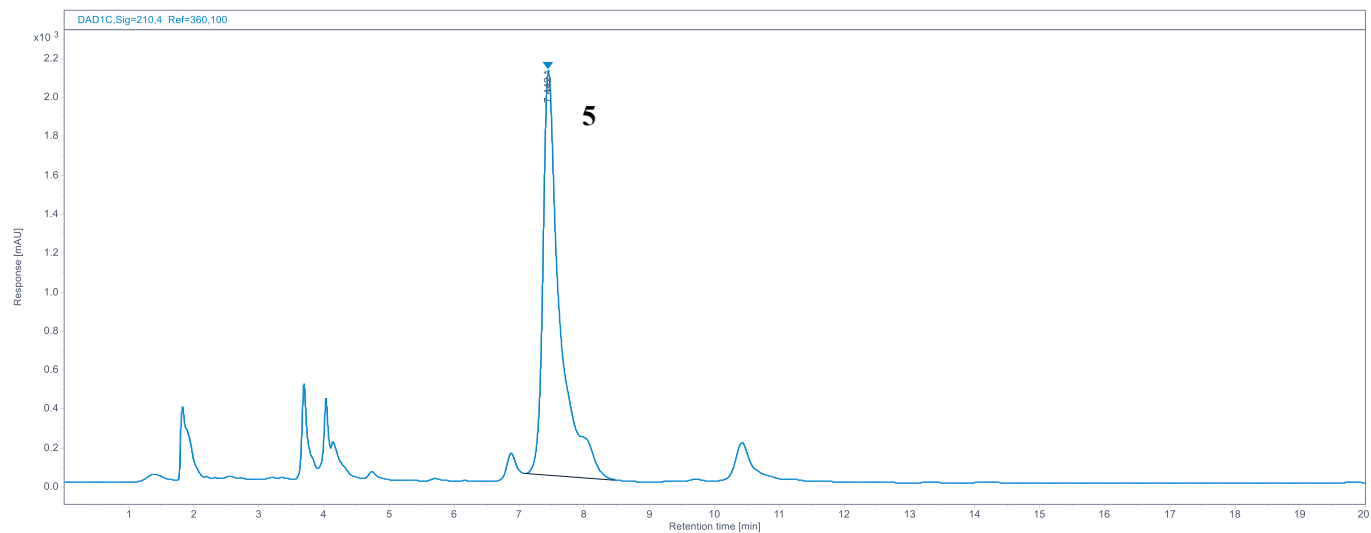

| # | RT (min) | Area (μV·s) | Area%         | Height   | Height% | Start time (min) | End time (min) |
|---|----------|-------------|---------------|----------|---------|------------------|----------------|
| 1 | 2.171    | 129226.923  | 77.661        | 8910.713 | 82.03   | 1.869            | 2.897          |
| 2 | 7.657    | 37171.524   | <b>22.339</b> | 1951.603 | 17.97   | 7.279            | 8.631          |

**Supplementary Figure 6.** Radio-HPLC analysis of **5-<sup>18</sup>F**

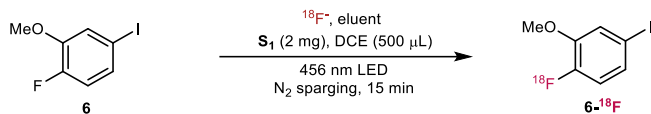

| Substrate | Product                 | Elution efficiency (EE)          | HPLC analysis conditions | RCC              |
|-----------|-------------------------|----------------------------------|--------------------------|------------------|
| <b>6</b>  | <b>6-<sup>18</sup>F</b> | 7.95 mCi/(7.95 + 0.24) mCi = 97% | 65% MeCN                 | 23% <sup>a</sup> |

**Supplementary Table 8.** Elution efficiency and RCC calculation of **6-<sup>18</sup>F**. a. 0.02 mmol substrate.

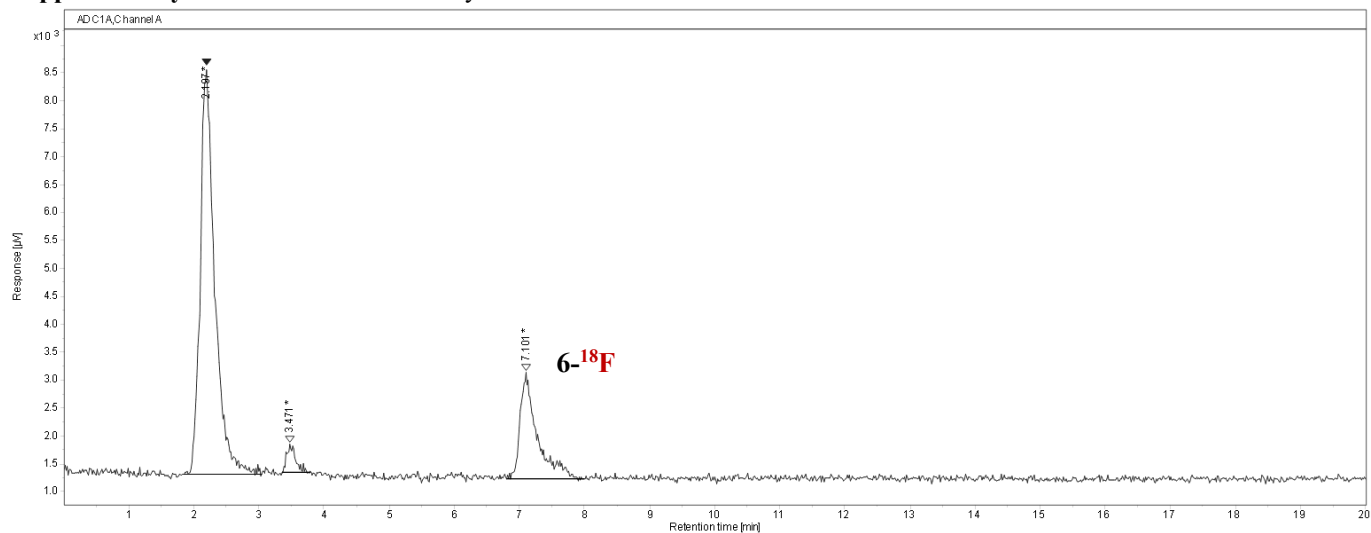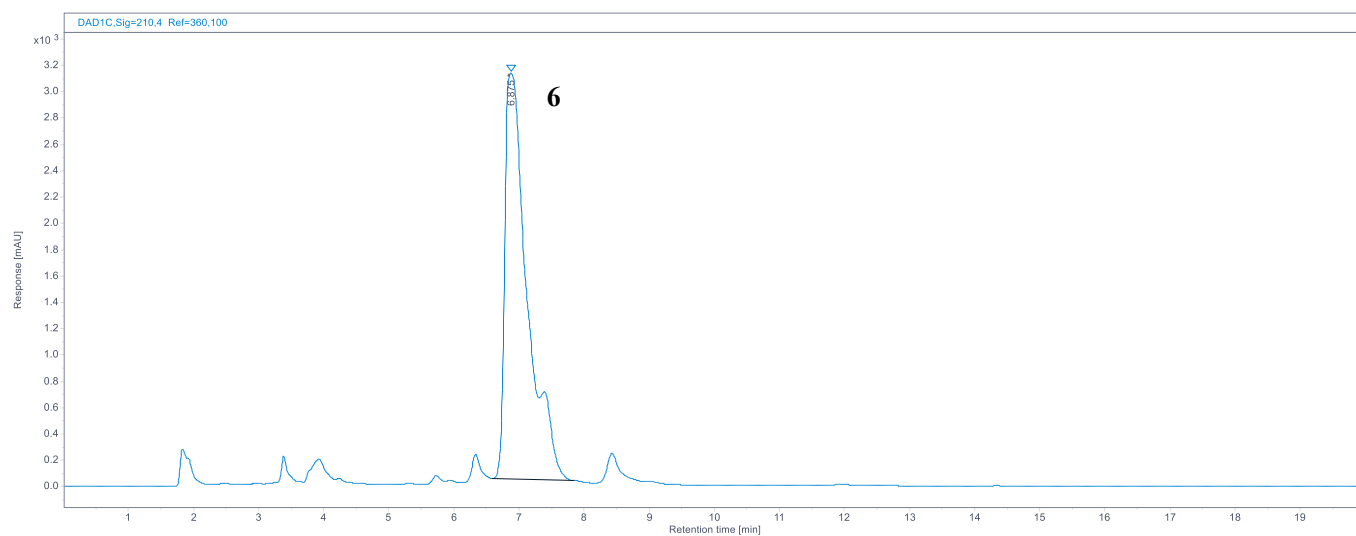

| # | RT (min) | Area (μV·s) | Area%         | Height   | Height% | Start time (min) | End time (min) |
|---|----------|-------------|---------------|----------|---------|------------------|----------------|
| 1 | 2.197    | 111758.209  | 73.948        | 7286.081 | 75.13   | 1.856            | 3.044          |
| 2 | 3.471    | 4666.438    | 3.088         | 501.223  | 5.17    | 3.360            | 3.783          |
| 3 | 7.101    | 34705.779   | <b>22.964</b> | 1910.724 | 19.70   | 6.800            | 7.997          |

**Supplementary Figure 7.** Radio-HPLC analysis of **6-<sup>18</sup>F**

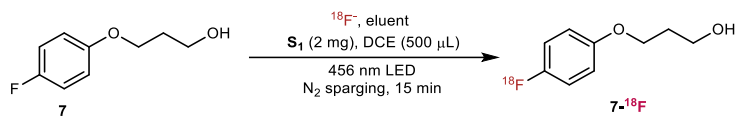

| Substrate | Product                 | Elution efficiency (EE)            | HPLC analysis conditions | RCC |
|-----------|-------------------------|------------------------------------|--------------------------|-----|
| <b>7</b>  | <b>7-<sup>18</sup>F</b> | 10.34 mCi/(10.34 + 0.27) mCi = 97% | 45% MeCN                 | 35% |

**Supplementary Table 9.** Elution efficiency and RCC calculation of **7-<sup>18</sup>F**.

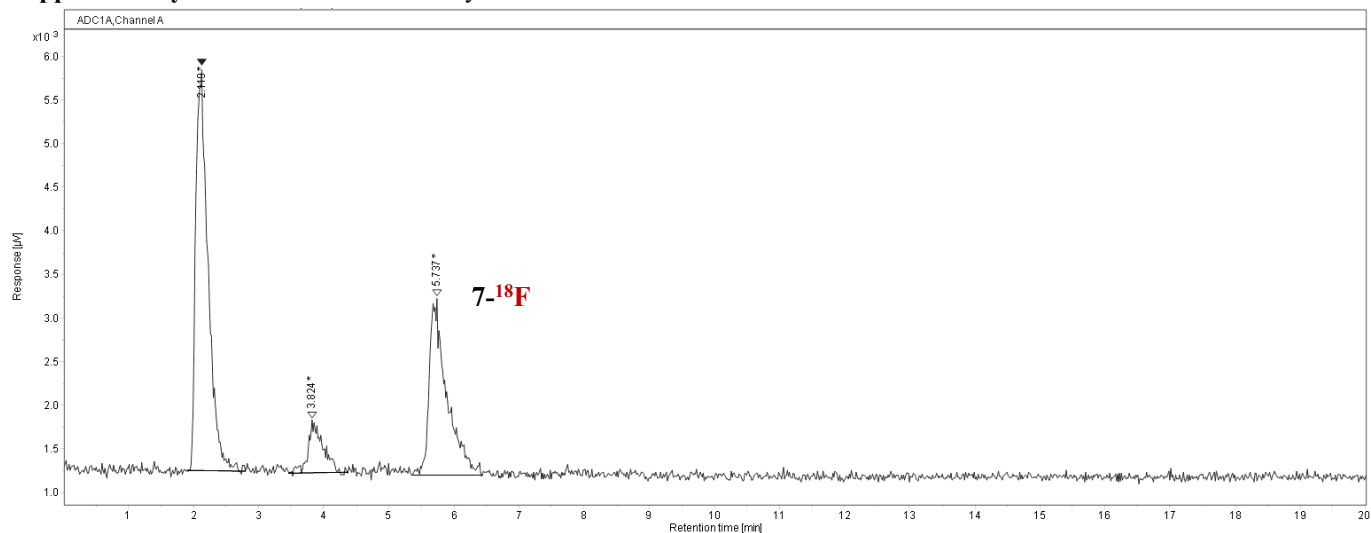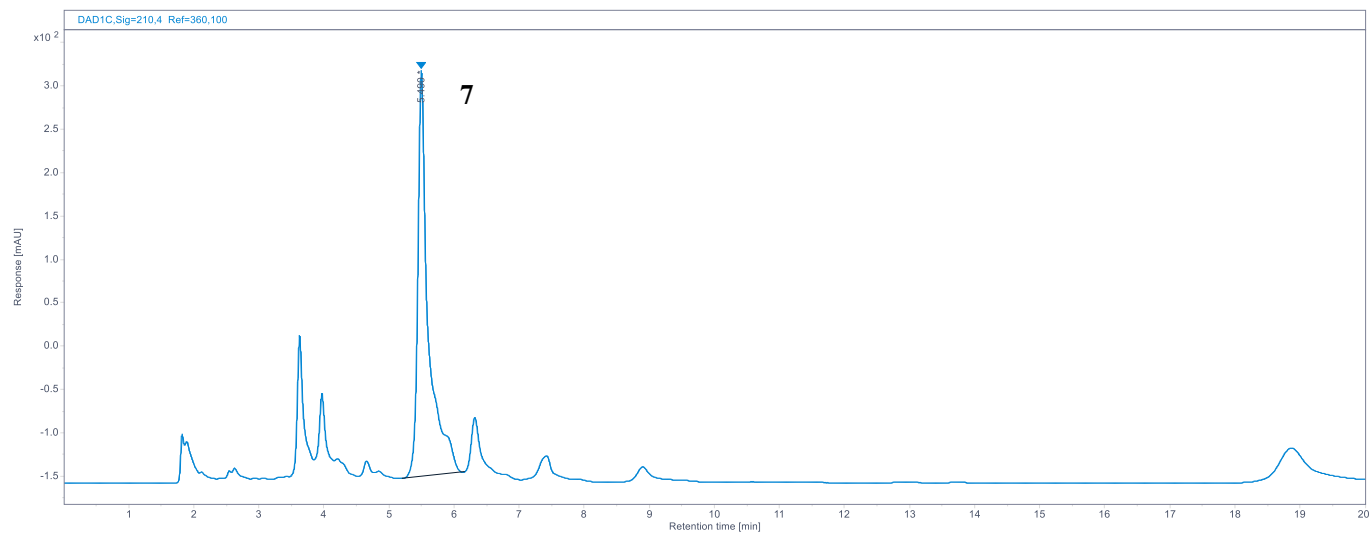

| # | RT (min) | Area (μV·s) | Area%         | Height   | Height% | Start time (min) | End time (min) |
|---|----------|-------------|---------------|----------|---------|------------------|----------------|
| 1 | 2.119    | 60248.389   | 56.271        | 4626.664 | 63.67   | 1.904            | 2.791          |
| 2 | 3.824    | 9347.097    | 8.730         | 609.044  | 8.38    | 3.463            | 4.374          |
| 3 | 5.737    | 37473.132   | <b>34.999</b> | 2031.356 | 27.95   | 5.352            | 6.436          |

**Supplementary Figure 8.** Radio-HPLC analysis of **7-<sup>18</sup>F**



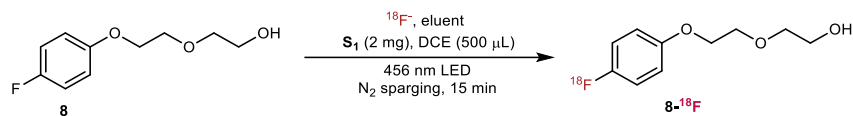

| Substrate | Product                 | Elution efficiency (EE)          | HPLC analysis conditions | RCC |
|-----------|-------------------------|----------------------------------|--------------------------|-----|
| <b>8</b>  | <b>8-<sup>18</sup>F</b> | 6.60 mCi/(6.60 + 0.21) mCi = 96% | 45% MeCN                 | 54% |

**Supplementary Table 10.** Elution efficiency and RCC calculation of **8-<sup>18</sup>F**.

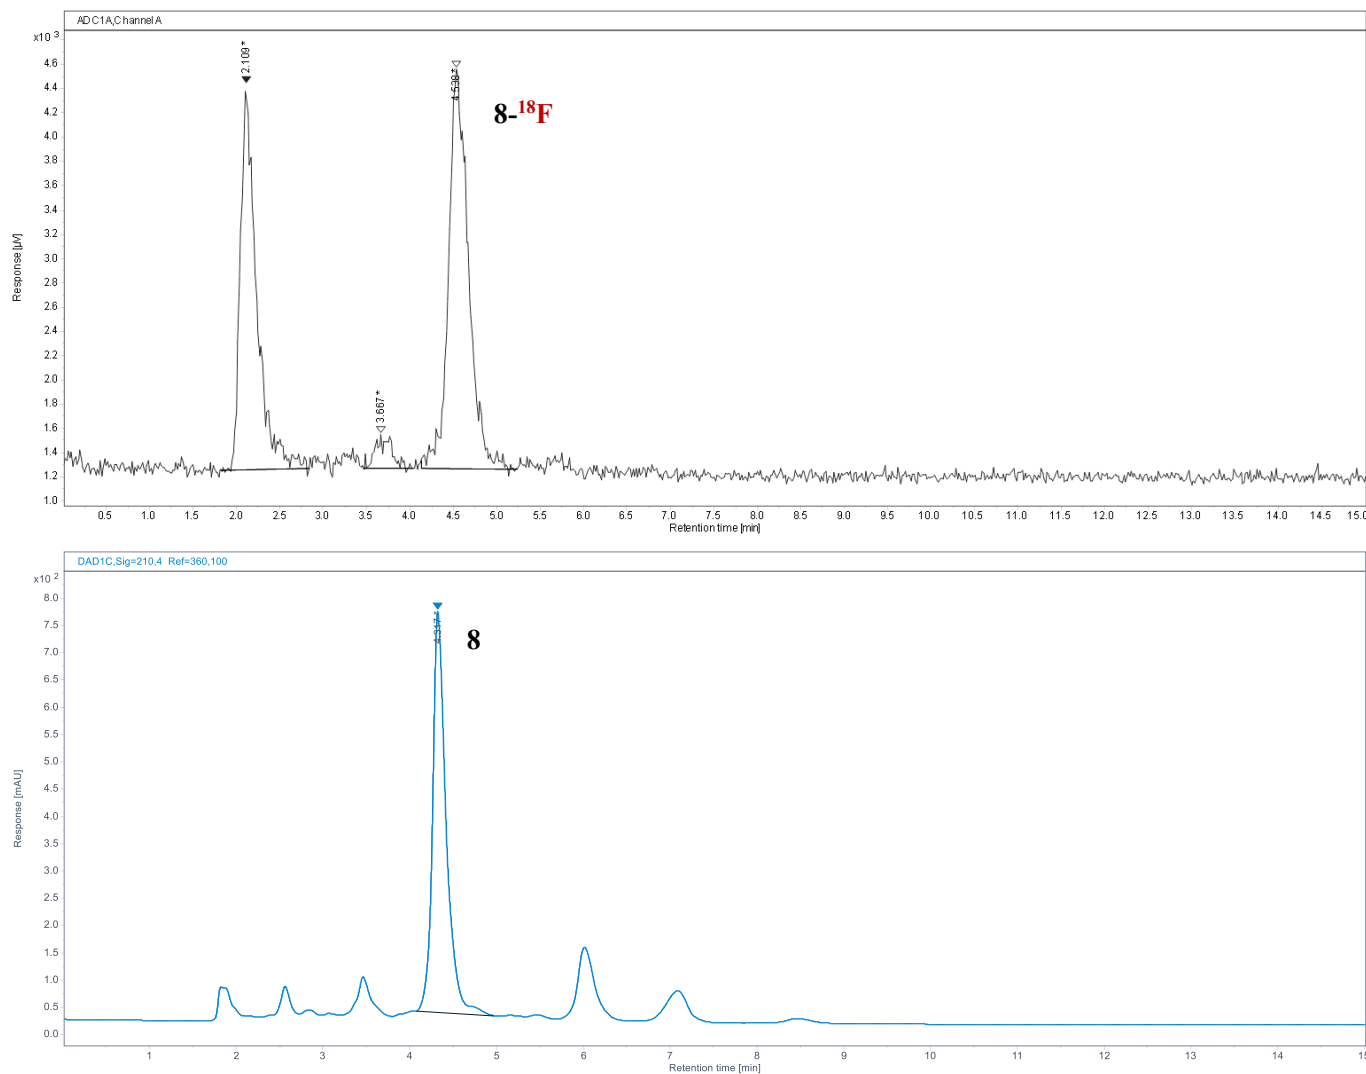

| # | RT (min) | Area (μV·s) | Area%         | Height   | Height% | Start time (min) | End time (min) |
|---|----------|-------------|---------------|----------|---------|------------------|----------------|
| 1 | 2.109    | 41044.450   | 42.260        | 3170.582 | 47.03   | 1.821            | 2.835          |
| 2 | 3.667    | 3566.132    | 3.672         | 279.393  | 4.14    | 3.462            | 4.034          |
| 3 | 4.538    | 52513.791   | <b>54.069</b> | 3291.871 | 48.83   | 4.127            | 5.234          |

**Supplementary Figure 9.** Radio-HPLC analysis of **8-<sup>18</sup>F**

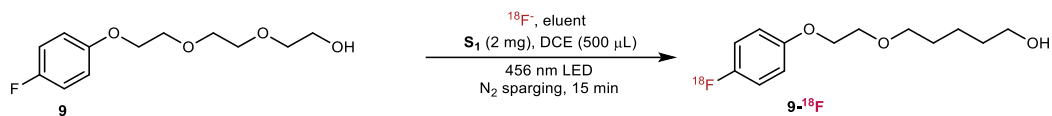

| Substrate | Product                 | Elution efficiency (EE)        | HPLC analysis conditions | RCC |
|-----------|-------------------------|--------------------------------|--------------------------|-----|
| <b>9</b>  | <b>9-<sup>18</sup>F</b> | 8.97 mCi/(8.97+0.54) mCi = 94% | 45% MeCN                 | 66% |

**Supplementary Table 11.** Elution efficiency and RCC calculation of **9-<sup>18</sup>F**.

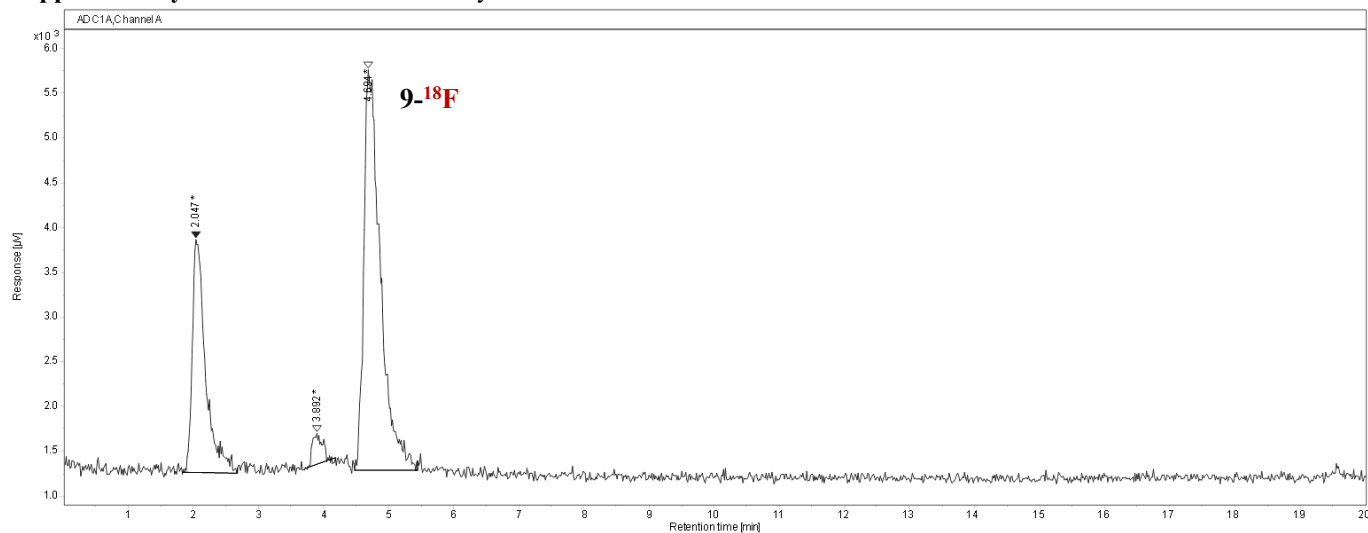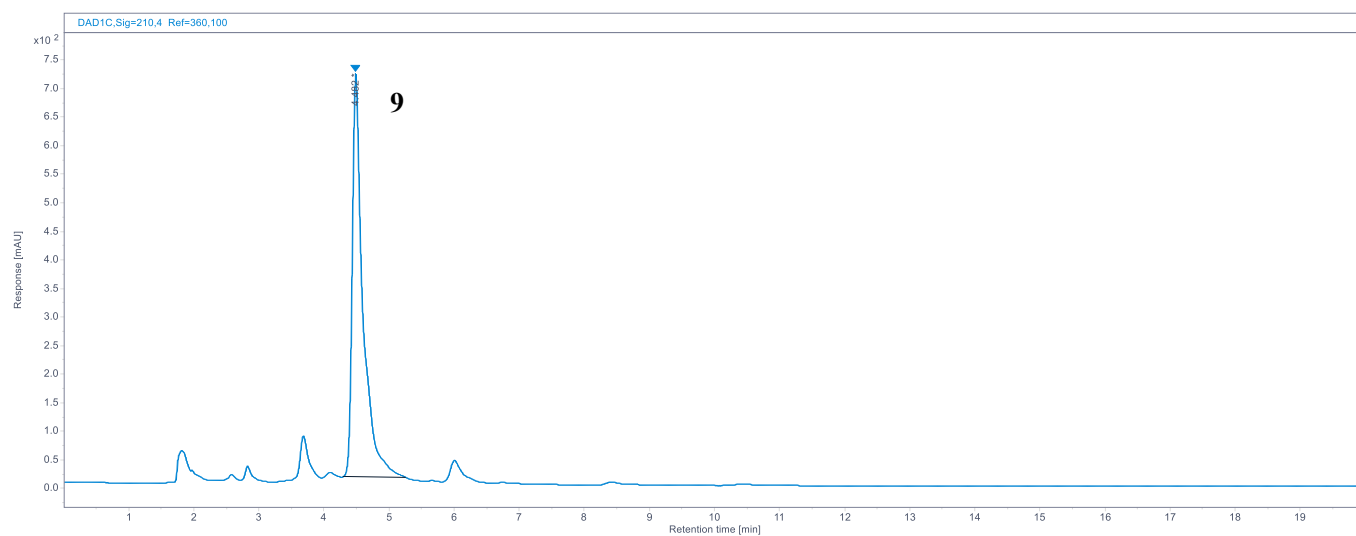

| # | RT (min) | Area ( $\mu\text{V}\cdot\text{s}$ ) | Area%         | Height   | Height% | Start time (min) | End time (min) |
|---|----------|-------------------------------------|---------------|----------|---------|------------------|----------------|
| 1 | 2.047    | 37264.208                           | 31.235        | 2601.713 | 35.05   | 1.835            | 2.676          |
| 2 | 3.892    | 3507.337                            | 2.940         | 352.220  | 4.75    | 3.720            | 4.176          |
| 3 | 4.694    | 78531.543                           | <b>65.825</b> | 4467.886 | 60.20   | 4.478            | 5.448          |

**Supplementary Figure 10.** Radio-HPLC analysis of **9-<sup>18</sup>F**

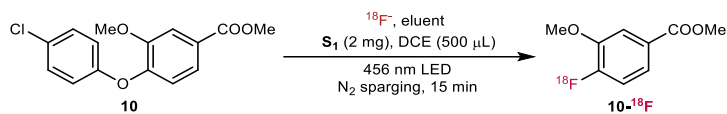

| Substrate     | Product                  | Elution efficiency (EE)       | HPLC analysis conditions | RCC |
|---------------|--------------------------|-------------------------------|--------------------------|-----|
| <b>10-deo</b> | <b>10-<sup>18</sup>F</b> | 6.4 mCi/(6.4 + 1.9) mCi = 77% | 60% MeCN                 | 44% |

**Supplementary Table 12.** Elution efficiency and RCC calculation of **10-<sup>18</sup>F**.

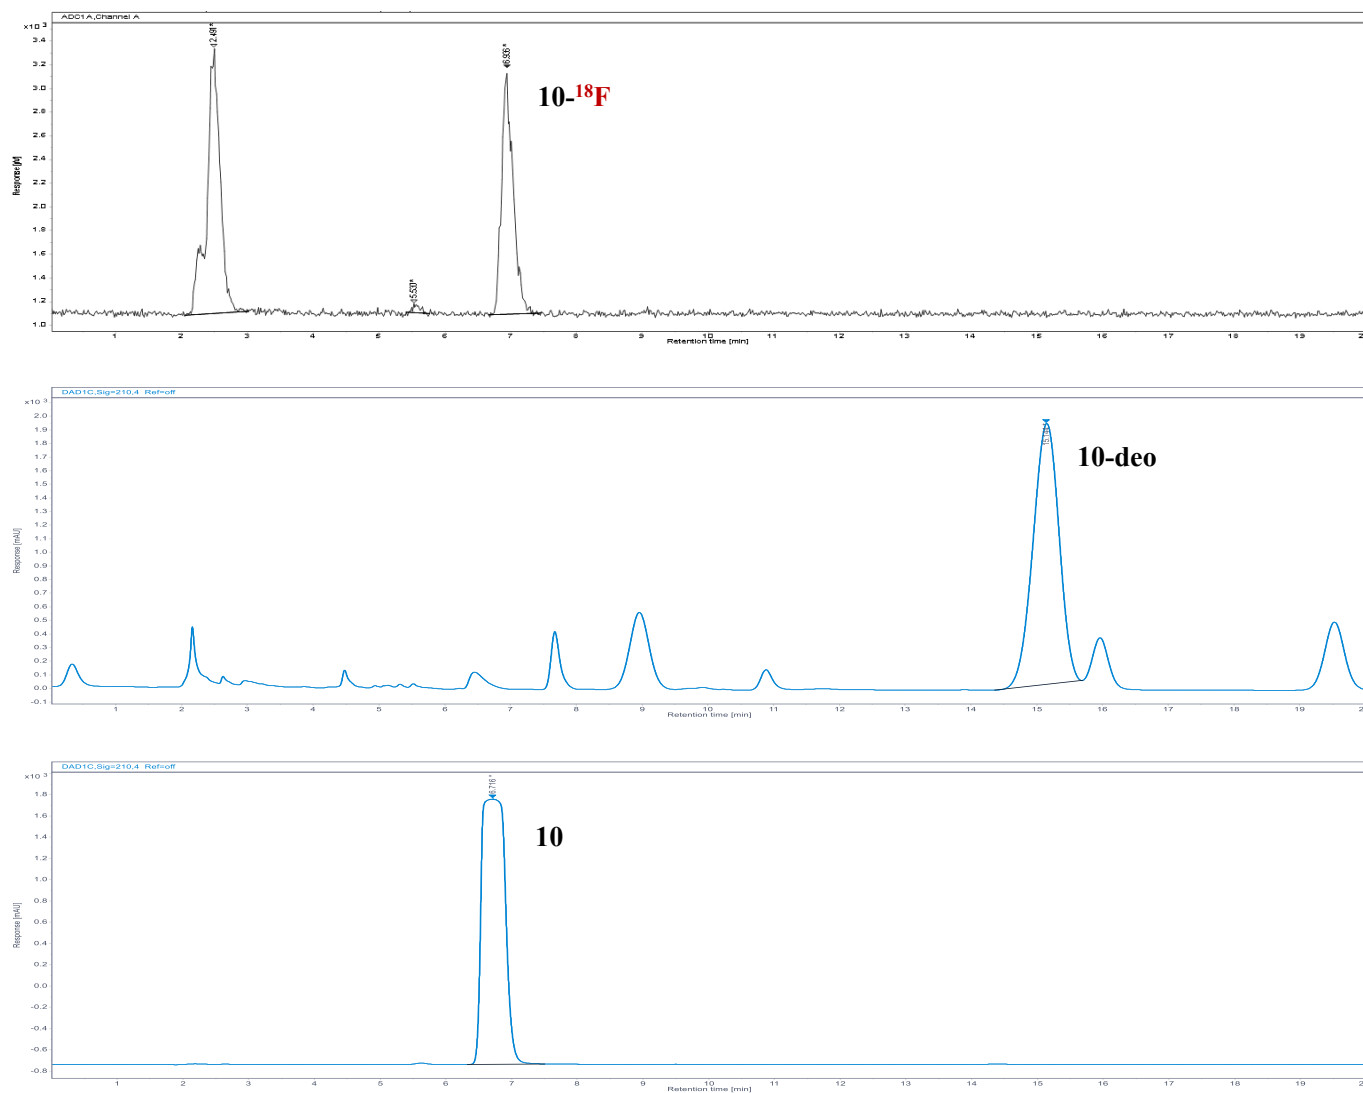

| # | RT (min) | Area ( $\mu\text{V}\cdot\text{s}$ ) | Area%         | Height   | Height% | Start time (min) | End time (min) |
|---|----------|-------------------------------------|---------------|----------|---------|------------------|----------------|
| 1 | 2.491    | 31602.544                           | 55.483        | 2243.407 | 51.05   | 2.039            | 3.016          |
| 2 | 5.530    | 492.414                             | 0.865         | 77.460   | 1.76    | 5.411            | 5.762          |
| 3 | 6.936    | 24864.414                           | <b>43.653</b> | 2073.815 | 47.19   | 6.662            | 7.455          |

**Supplementary Figure 11.** Radio-HPLC analysis of **10-<sup>18</sup>F**

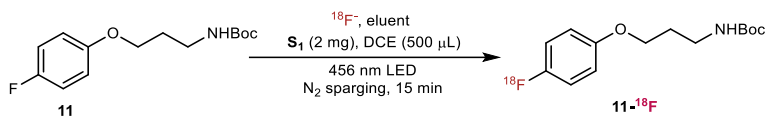

| Substrate | Product                  | Elution efficiency (EE)          | HPLC analysis conditions | RCC |
|-----------|--------------------------|----------------------------------|--------------------------|-----|
| <b>11</b> | <b>11-<sup>18</sup>F</b> | 9.57 mCi/(9.57 + 2.57) mCi = 79% | 40% MeCN                 | 19% |

**Supplementary Table 13.** Elution efficiency and RCC calculation of **11-<sup>18</sup>F**.

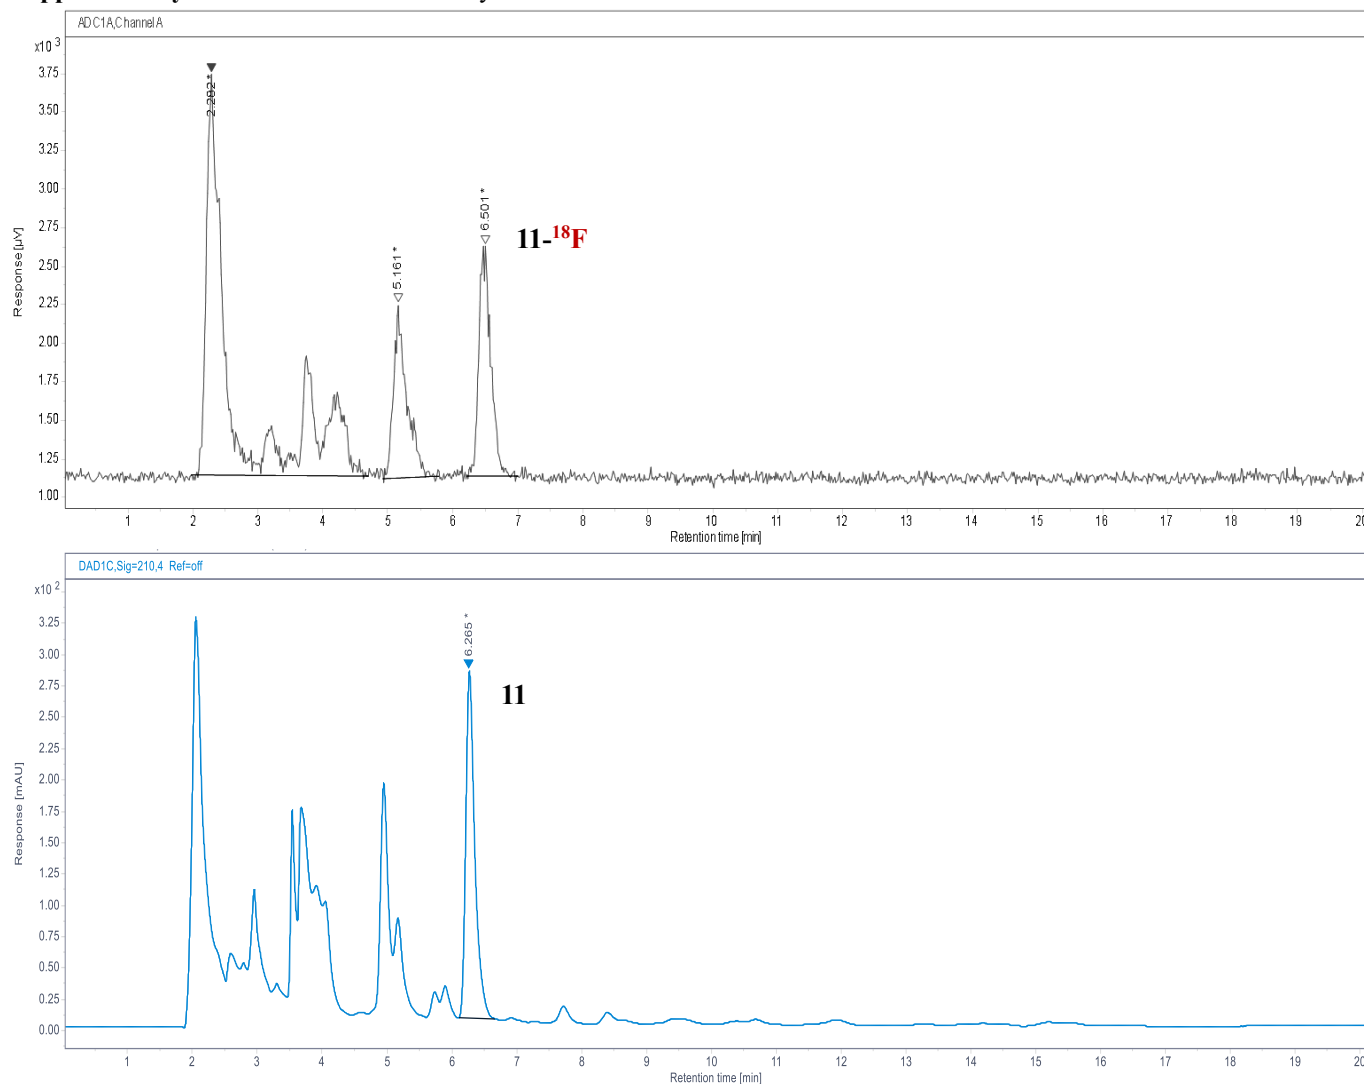

| # | RT (min) | Area ( $\mu\text{V} \cdot \text{s}$ ) | Area%         | Height ( $\mu\text{V}$ ) | Height% | Start time (min) | End time (min) |
|---|----------|---------------------------------------|---------------|--------------------------|---------|------------------|----------------|
| 1 | 2.282    | 65500.523                             | 65.382        | 2602.948                 | 49.81   | 1.967            | 4.693          |
| 2 | 5.161    | 15749.092                             | 15.720        | 1126.969                 | 21.56   | 4.926            | 5.793          |
| 3 | 6.501    | 18932.394                             | <b>18.898</b> | 1496.098                 | 28.63   | 6.211            | 7.001          |

**Supplementary Figure 12.** Radio-HPLC analysis of **11-<sup>18</sup>F**

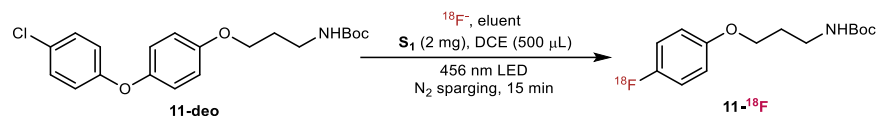

| Substrate     | Product                  | Elution efficiency (EE)          | HPLC analysis conditions | RCC |
|---------------|--------------------------|----------------------------------|--------------------------|-----|
| <b>11-deo</b> | <b>11-<sup>18</sup>F</b> | 11.5 mCi/(11.5 + 1.88) mCi = 86% | 40% MeCN                 | 46% |

**Supplementary Table 14.** Elution efficiency and RCC calculation of **11-<sup>18</sup>F** from **11-deo**.

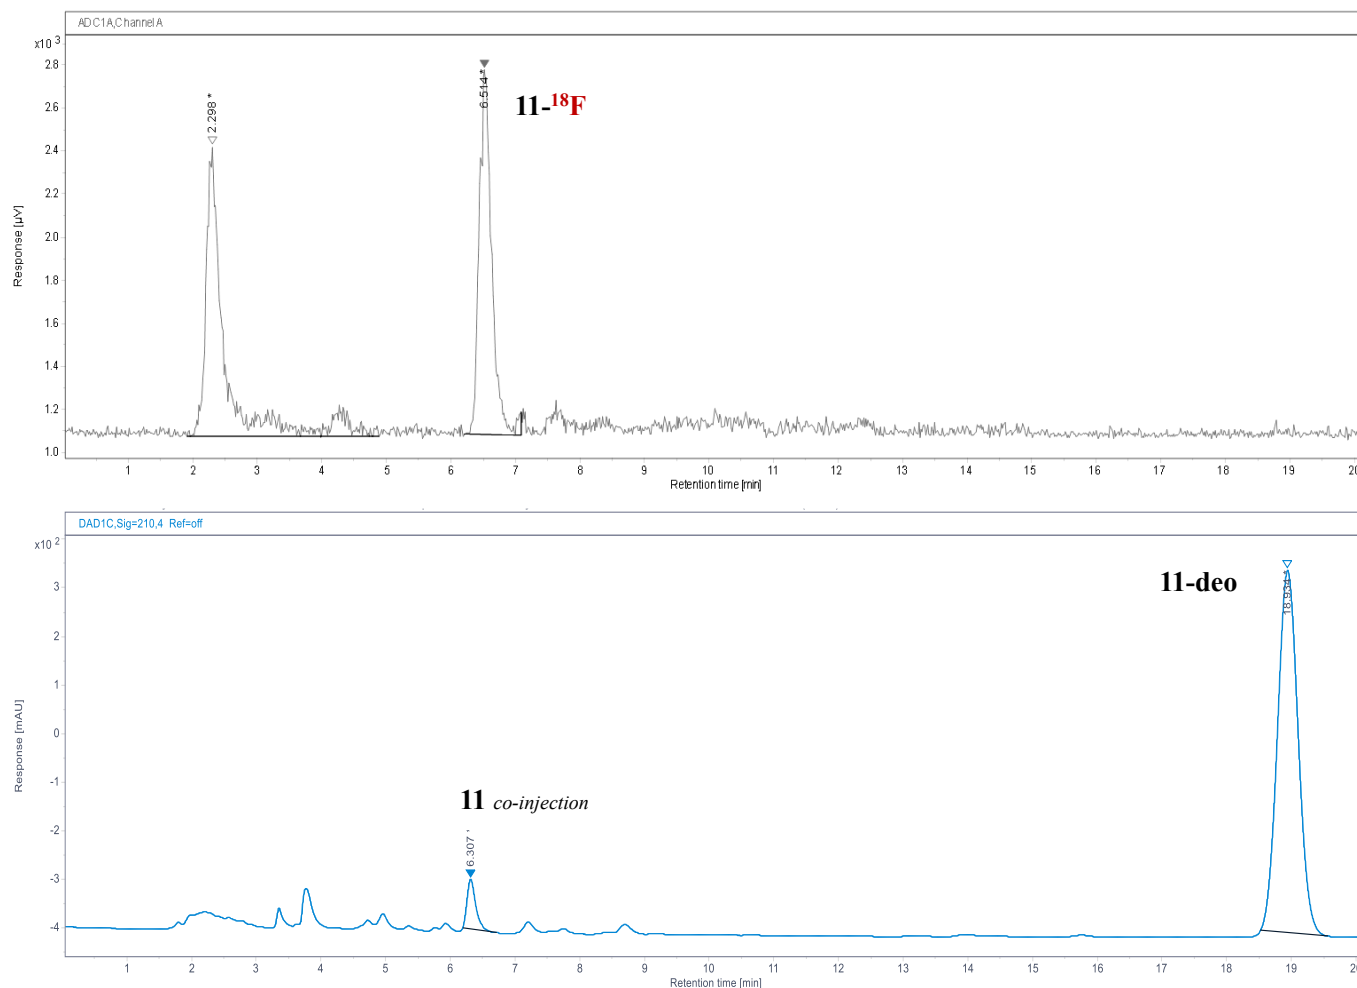

| # | RT (min) | Area ( $\mu\text{V} \cdot \text{s}$ ) | Area%         | Height ( $\mu\text{V}$ ) | Height% | Start time (min) | End time (min) |
|---|----------|---------------------------------------|---------------|--------------------------|---------|------------------|----------------|
| 1 | 2.298    | 26789.781                             | 53.845        | 1345.158                 | 44.25   | 1.911            | 4.885          |
| 2 | 6.514    | 22963.429                             | <b>46.155</b> | 1694.656                 | 55.75   | 6.211            | 7.083          |

**Supplementary Figure 13.** Radio-HPLC analysis of **11-<sup>18</sup>F**

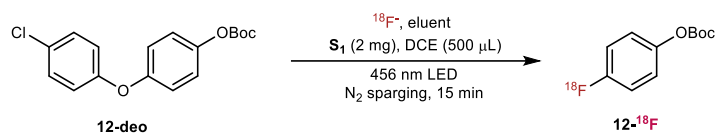

| Substrate     | Product                  | Elution efficiency (EE)         | HPLC analysis conditions | RCC |
|---------------|--------------------------|---------------------------------|--------------------------|-----|
| <b>12-deo</b> | <b>12-<sup>18</sup>F</b> | 27.3 mCi/(27.3 + 1.6) mCi = 95% | 45% MeCN                 | 75% |

**Supplementary Table 15.** Elution efficiency and RCC calculation of **12-<sup>18</sup>F** from **12-deo**.

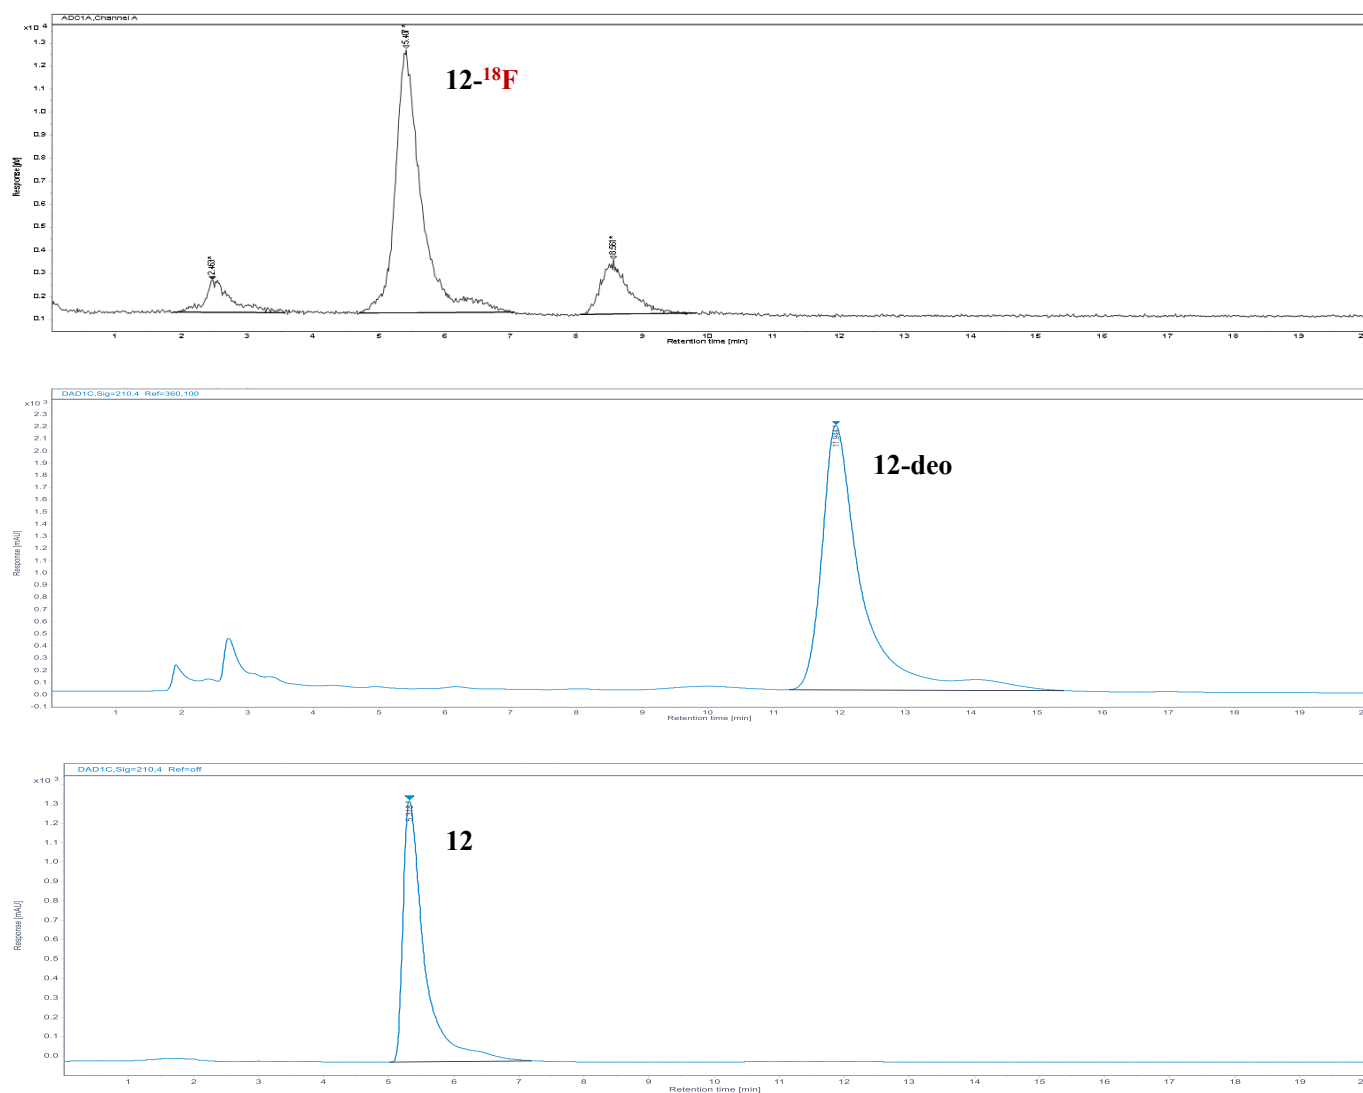

| # | RT (min) | Area (µV·s) | Area%         | Height    | Height% | Start time (min) | End time (min) |
|---|----------|-------------|---------------|-----------|---------|------------------|----------------|
| 1 | 2.463    | 39818.942   | 9.471         | 1394.764  | 9.20    | 1.875            | 3.552          |
| 2 | 5.407    | 314206.738  | <b>74.736</b> | 11432.658 | 75.40   | 4.696            | 7.047          |
| 3 | 8.561    | 66397.611   | 15.793        | 2334.941  | 15.40   | 8.058            | 9.806          |

**Supplementary Figure 14.** Radio-HPLC analysis of **12-<sup>18</sup>F**

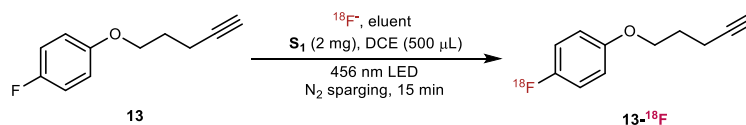

| Substrate | Product             | Elution efficiency (EE)     | HPLC analysis conditions | RCC |
|-----------|---------------------|-----------------------------|--------------------------|-----|
| 13        | 13- $^{18}\text{F}$ | 33 mCi/(33 + 2.5) mCi = 93% | 60% MeCN                 | 67% |

**Supplementary Table 16.** Elution efficiency and RCC calculation of 13- $^{18}\text{F}$ .

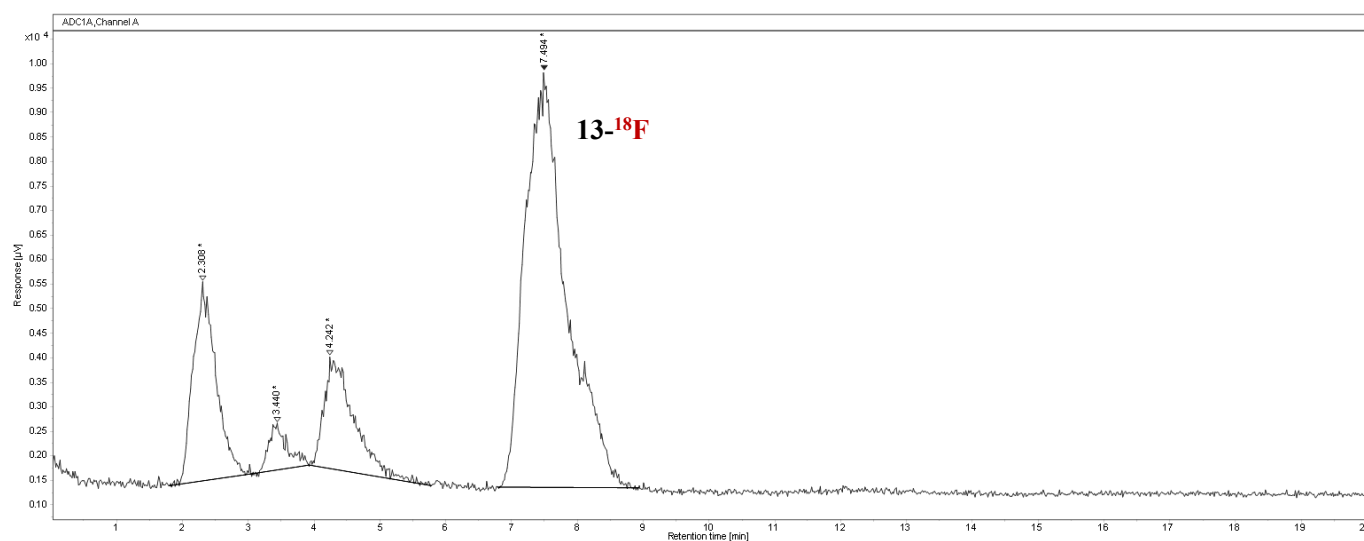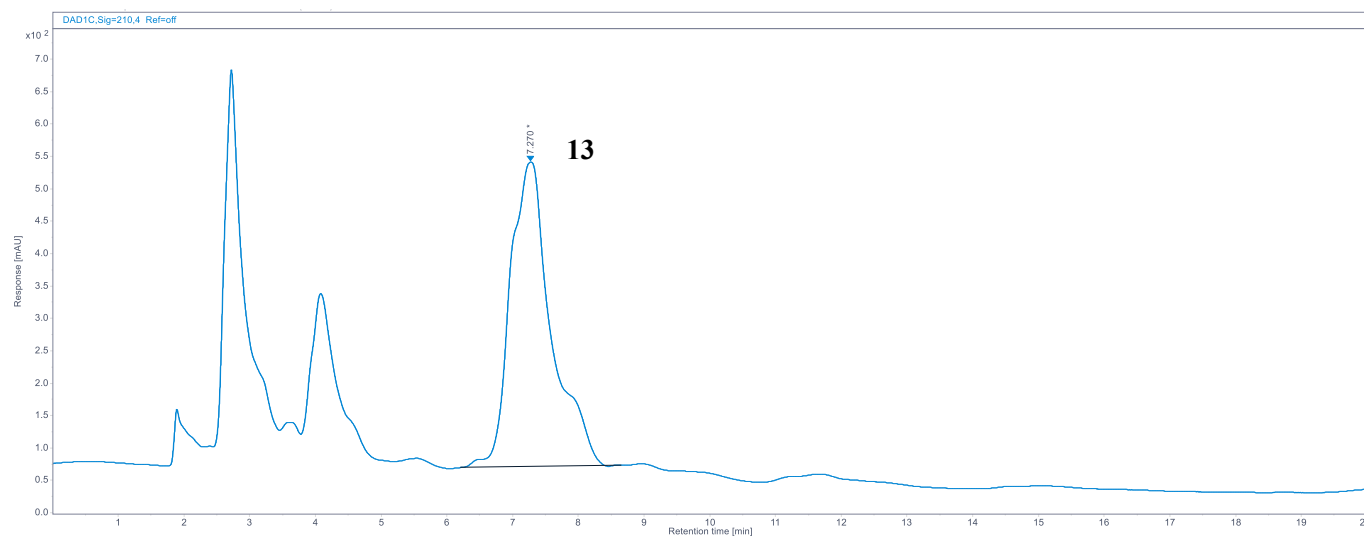

| # | RT (min) | Area (μV·s) | Area%         | Height   | Height% | Start time (min) | End time (min) |
|---|----------|-------------|---------------|----------|---------|------------------|----------------|
| 1 | 2.308    | 96802.592   | 17.423        | 4057.725 | 25.73   | 1.804            | 3.079          |
| 2 | 3.440    | 17963.870   | 3.233         | 944.674  | 5.99    | 3.079            | 3.929          |
| 3 | 4.242    | 71327.400   | 12.838        | 2281.407 | 14.47   | 3.929            | 5.781          |
| 4 | 7.494    | 369517.160  | <b>66.506</b> | 8486.968 | 53.81   | 6.790            | 8.931          |

**Supplementary Figure 15.** Radio-HPLC analysis of 13- $^{18}\text{F}$

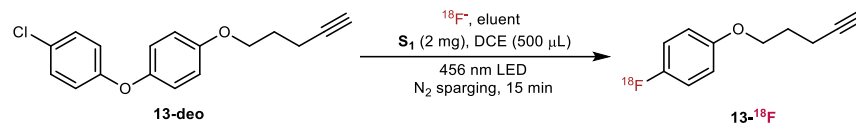

| Substrate     | Product                  | Elution efficiency (EE)           | HPLC analysis conditions | RCC |
|---------------|--------------------------|-----------------------------------|--------------------------|-----|
| <b>13-deo</b> | <b>13-<sup>18</sup>F</b> | 25.05 mCi/(25.05 + 3.25) mCi= 89% | 60% MeCN                 | 83% |

**Supplementary Table 17.** Elution efficiency and RCC calculation of **11-<sup>18</sup>F** from **13-deo**.

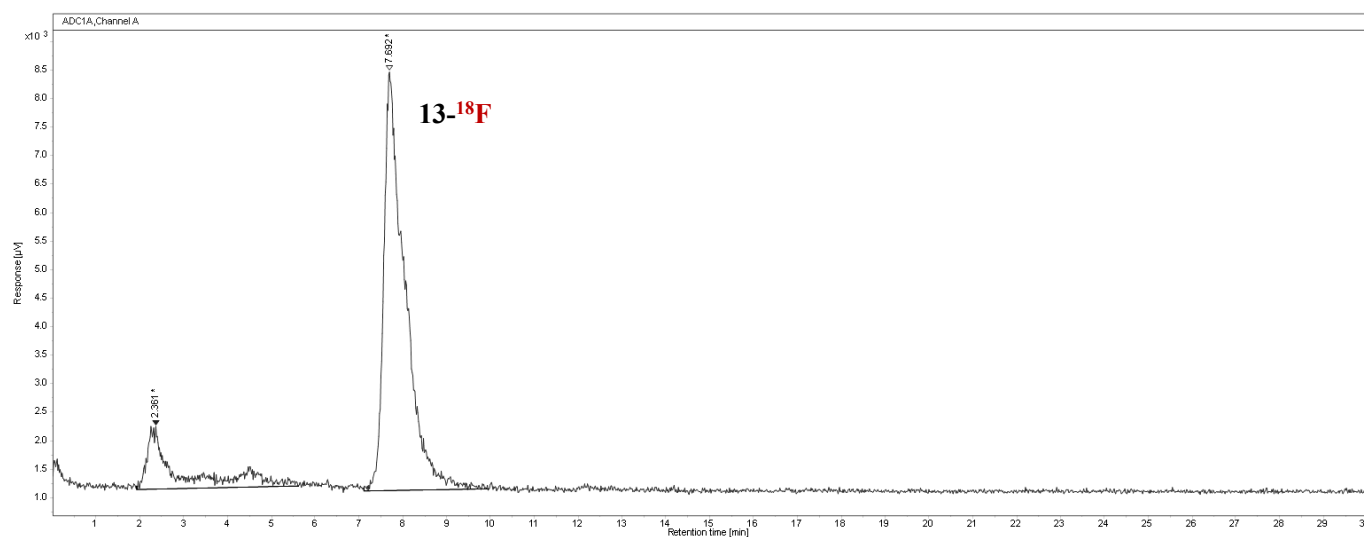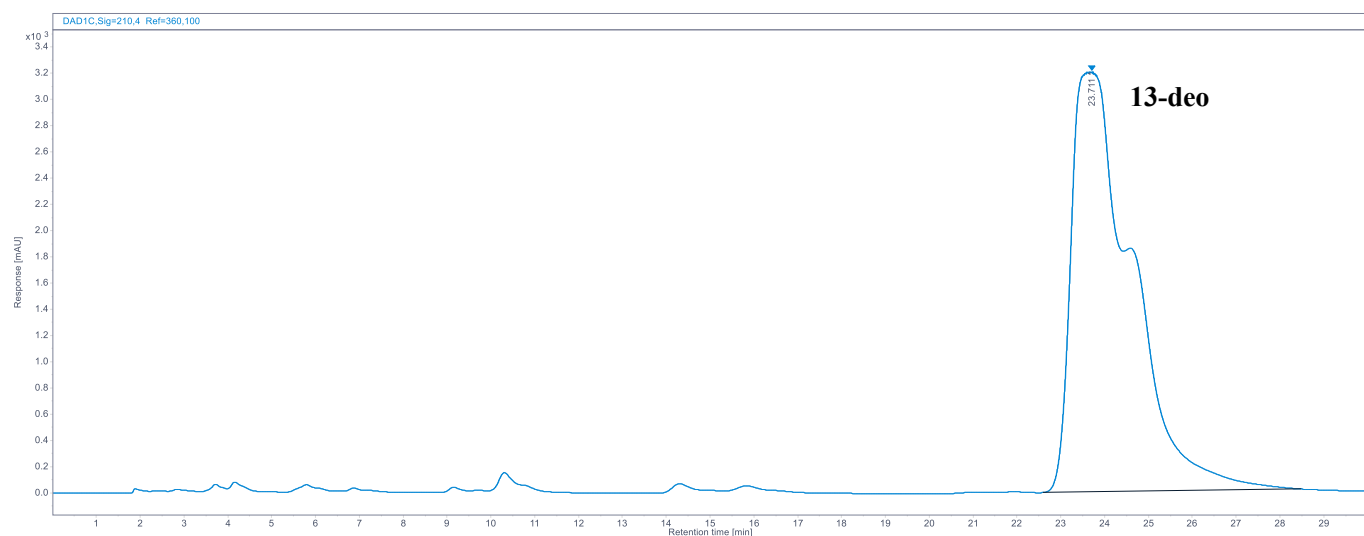

| # | RT (min) | Area (μV·s) | Area%         | Height   | Height% | Start time (min) | End time (min) |
|---|----------|-------------|---------------|----------|---------|------------------|----------------|
| 1 | 2.361    | 52106.956   | 17.371        | 1103.031 | 13.04   | 1.929            | 5.627          |
| 2 | 7.692    | 247850.271  | <b>82.629</b> | 7356.385 | 86.96   | 7.119            | 9.961          |

**Supplementary Figure 16.** Radio-HPLC analysis of **13-<sup>18</sup>F**



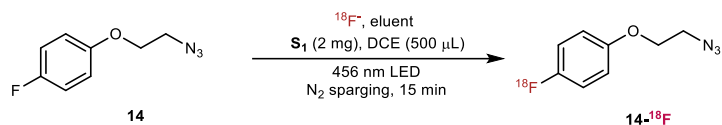

| Substrate | Product             | Elution efficiency (EE)          | HPLC analysis conditions | RCC |
|-----------|---------------------|----------------------------------|--------------------------|-----|
| 14        | 14- $^{18}\text{F}$ | 6.82 mCi/(6.82 + 0.26) mCi = 96% | 60% MeCN                 | 45% |

**Supplementary Table 18.** Elution efficiency and RCC calculation of 14- $^{18}\text{F}$ .

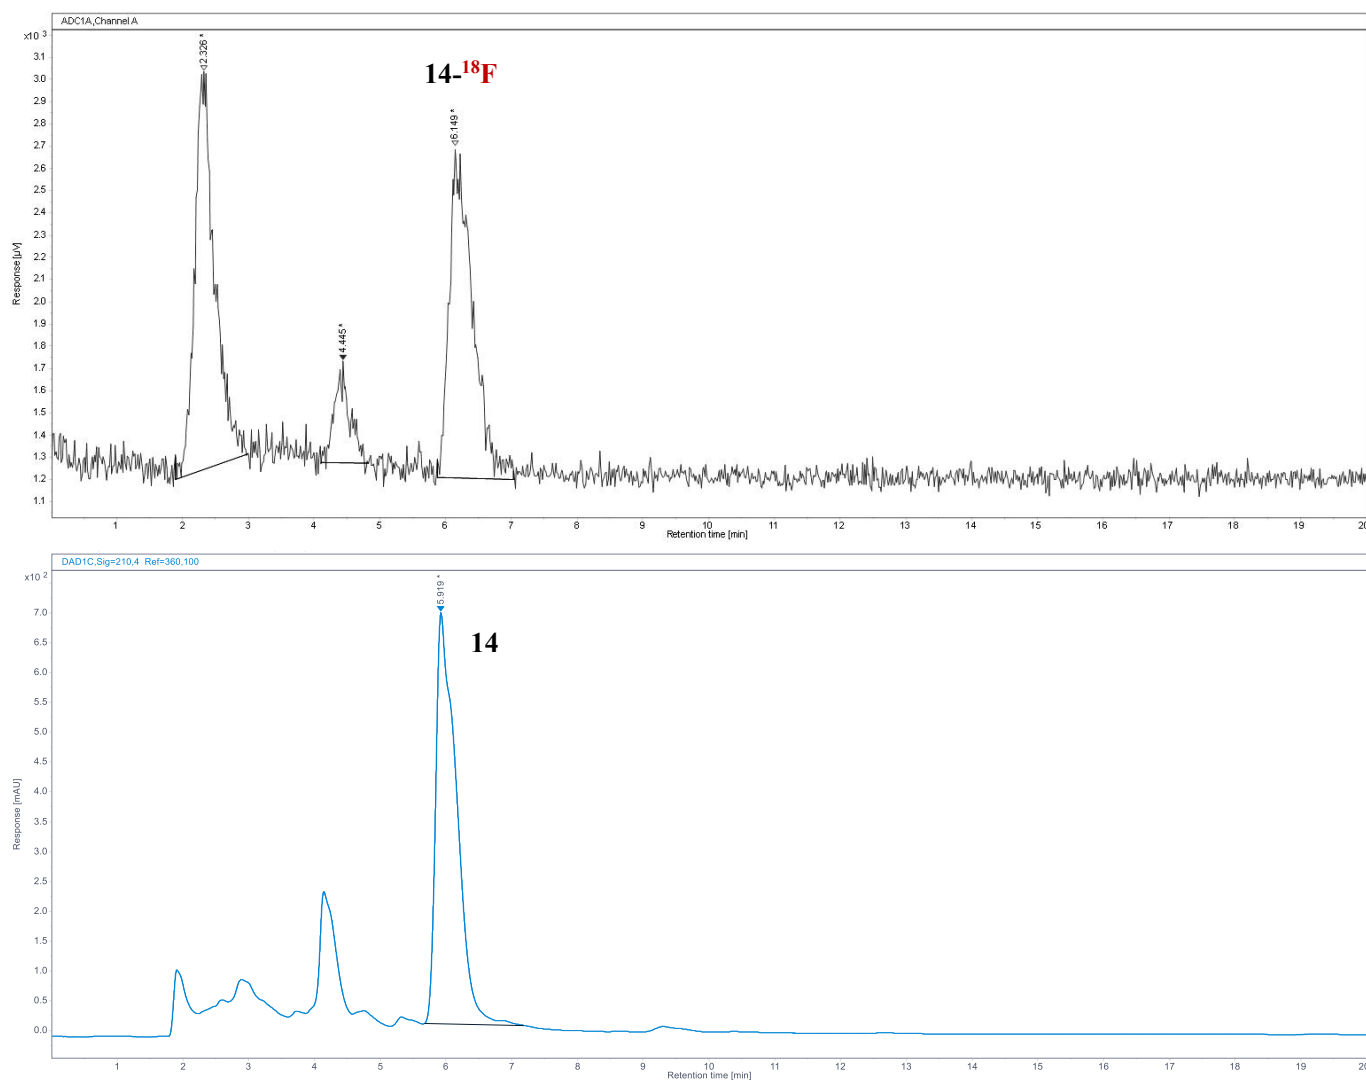

| # | RT (min) | Area (μV·s) | Area%         | Height   | Height% | Start time (min) | End time (min) |
|---|----------|-------------|---------------|----------|---------|------------------|----------------|
| 1 | 2.326    | 38151.666   | 46.658        | 1789.667 | 47.90   | 1.891            | 2.999          |
| 2 | 4.445    | 7025.865    | 8.592         | 458.212  | 12.26   | 4.108            | 4.824          |
| 3 | 6.149    | 36591.794   | <b>44.750</b> | 1488.721 | 39.84   | 5.878            | 7.032          |

**Supplementary Figure 17.** Radio-HPLC analysis of 14- $^{18}\text{F}$

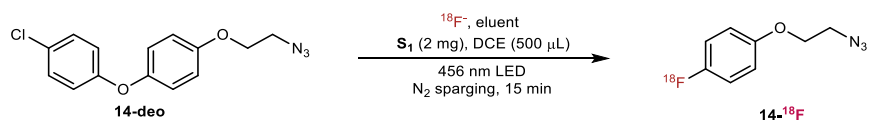

| Substrate     | Product                  | Elution efficiency (EE)            | HPLC analysis conditions | RCC |
|---------------|--------------------------|------------------------------------|--------------------------|-----|
| <b>14-deo</b> | <b>14-<sup>18</sup>F</b> | 11.42 mCi/(11.42 + 0.63) mCi = 95% | 60% MeCN                 | 66% |

**Supplementary Table 19.** Elution efficiency and RCC calculation of **14-<sup>18</sup>F** from **14-deo**.

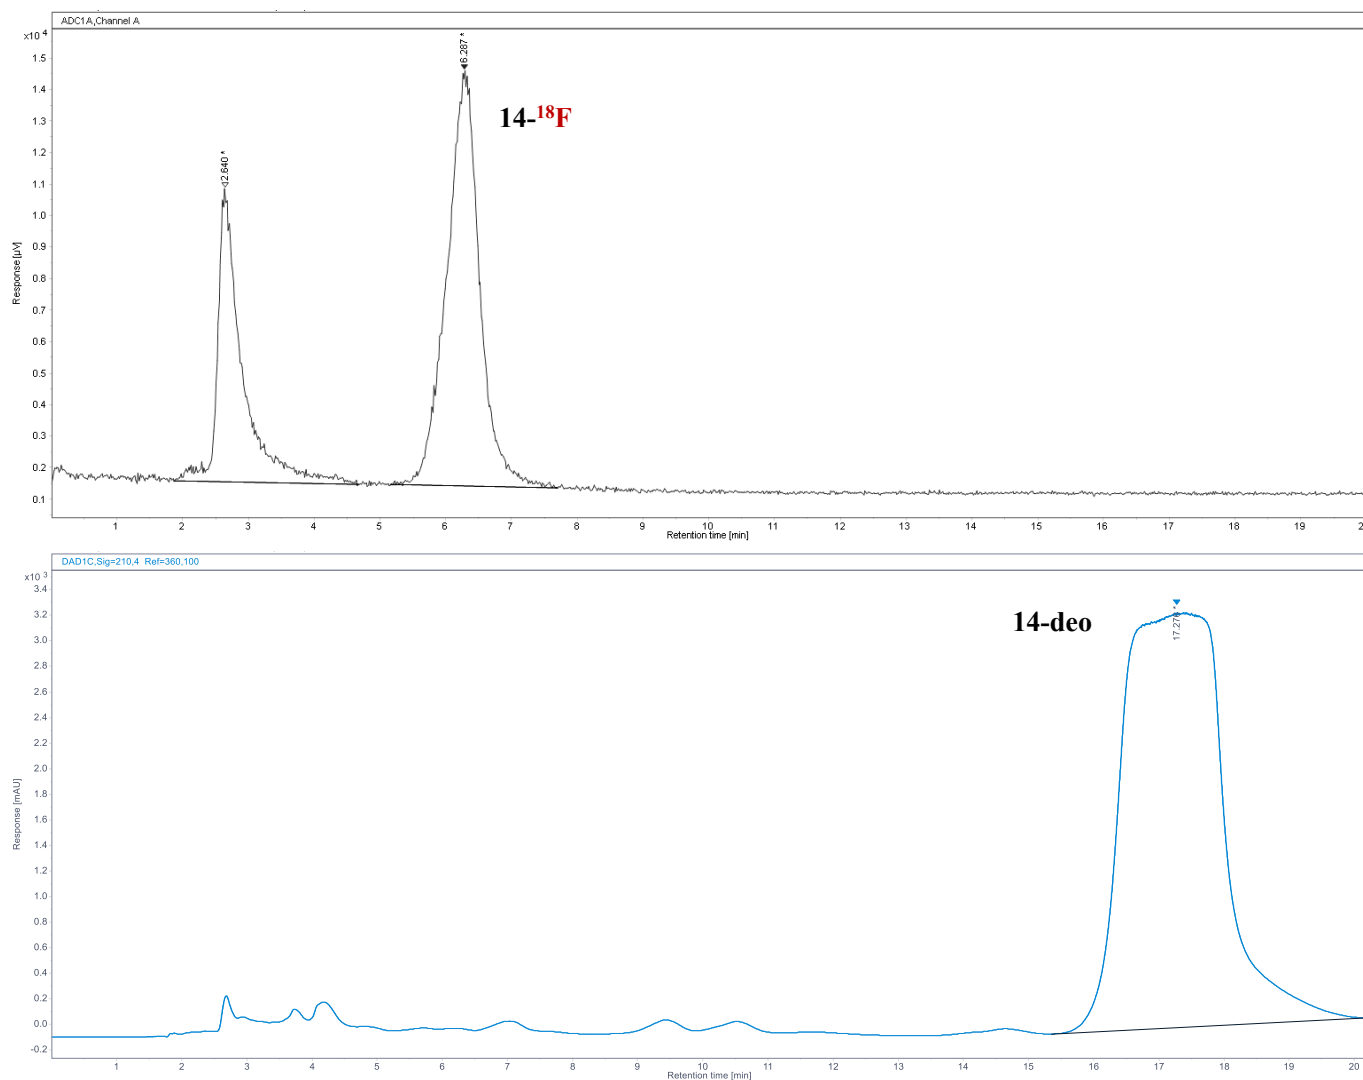

| # | RT (min) | Area (μV·s) | Area%         | Height    | Height% | Start time (min) | End time (min) |
|---|----------|-------------|---------------|-----------|---------|------------------|----------------|
| 1 | 2.640    | 241937.155  | 34.508        | 9318.917  | 41.40   | 1.870            | 4.673          |
| 2 | 6.287    | 459163.951  | <b>65.492</b> | 13192.681 | 58.60   | 5.163            | 7.698          |

**Supplementary Figure 18.** Radio-HPLC analysis of **14-<sup>18</sup>F**

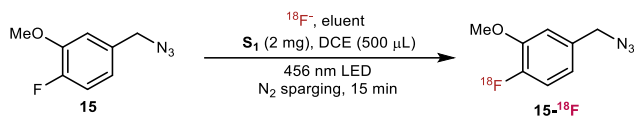

| Substrate | Product                  | Elution efficiency (EE)            | HPLC analysis conditions | RCC |
|-----------|--------------------------|------------------------------------|--------------------------|-----|
| <b>15</b> | <b>15-<sup>18</sup>F</b> | 10.11 mCi/(10.11 + 0.38) mCi = 96% | 55% MeCN                 | 35% |

**Supplementary Table 20.** Elution efficiency and RCC calculation of **15-<sup>18</sup>F**.

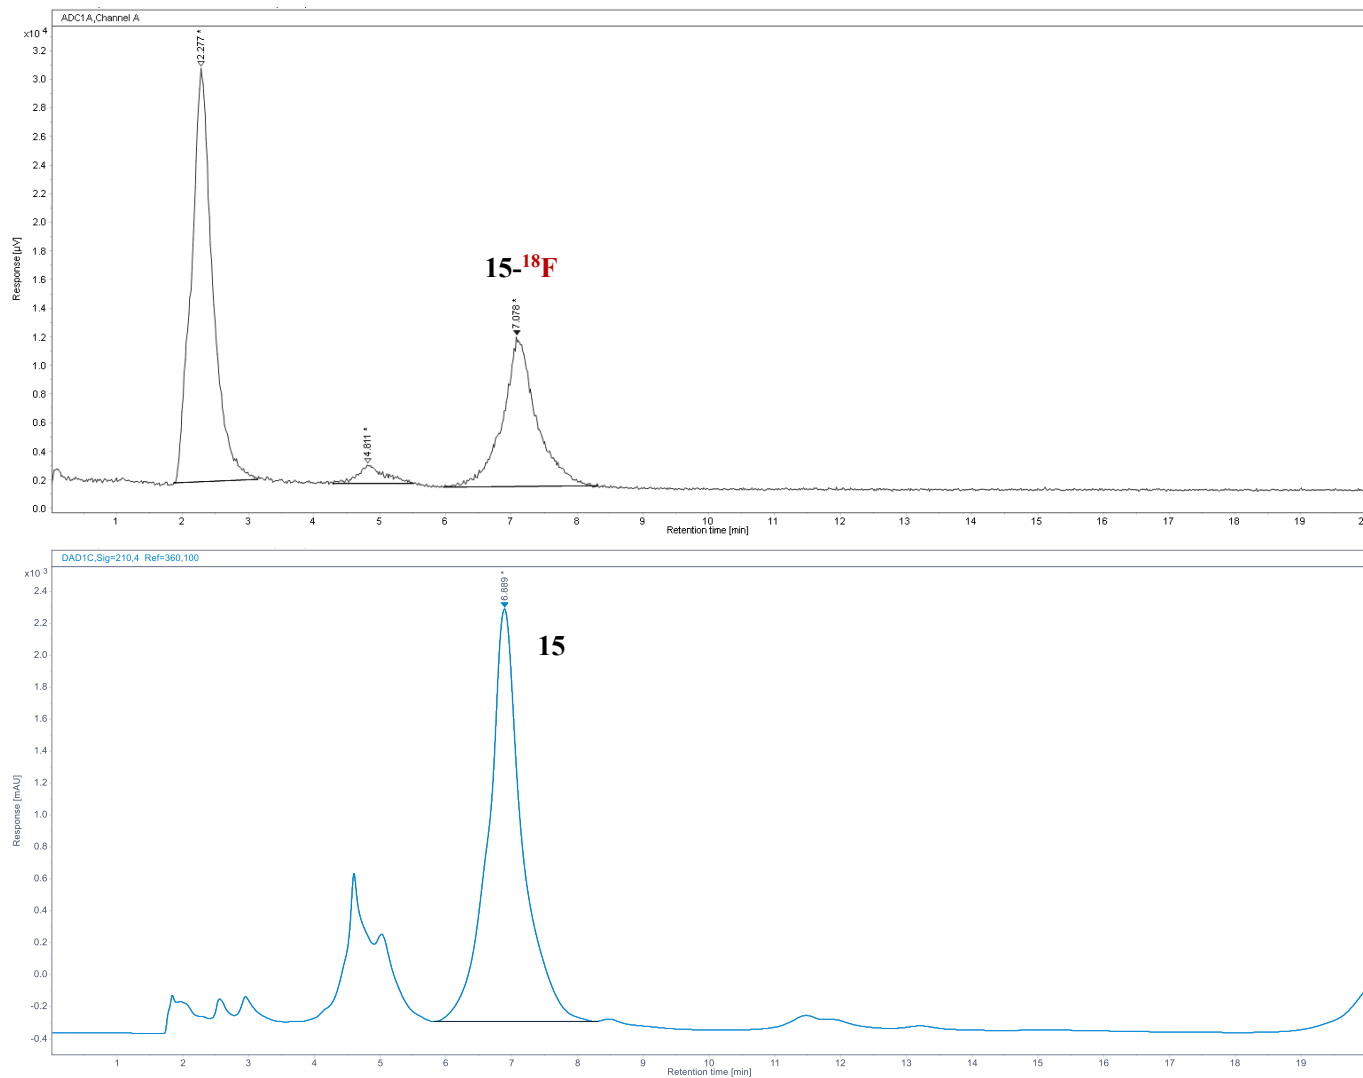

| # | RT (min) | Area (μV·s) | Area%         | Height    | Height% | Start time (min) | End time (min) |
|---|----------|-------------|---------------|-----------|---------|------------------|----------------|
| 1 | 2.277    | 650040.587  | 61.414        | 28955.263 | 71.01   | 1.869            | 3.141          |
| 2 | 4.811    | 36572.667   | 3.455         | 1306.397  | 3.20    | 4.284            | 5.510          |
| 3 | 7.078    | 371842.684  | <b>35.131</b> | 10511.859 | 25.78   | 5.966            | 8.316          |

**Supplementary Figure 19.** Radio-HPLC analysis of **15-<sup>18</sup>F**

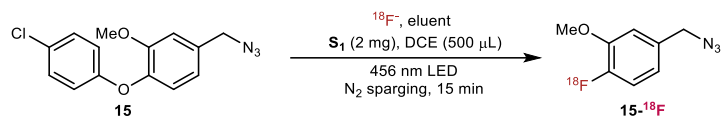

| Substrate | Product             | Elution efficiency (EE)            | HPLC analysis conditions | RCC              |
|-----------|---------------------|------------------------------------|--------------------------|------------------|
| 15-deo    | 15- <sup>18</sup> F | 12.68 mCi/(12.68 + 0.28) mCi = 98% | 55% MeCN                 | 34% <sup>a</sup> |

**Supplementary Table 21.** Elution efficiency and RCC calculation of 15-<sup>18</sup>F from 15-deo. A.0.02 mmol substrate.

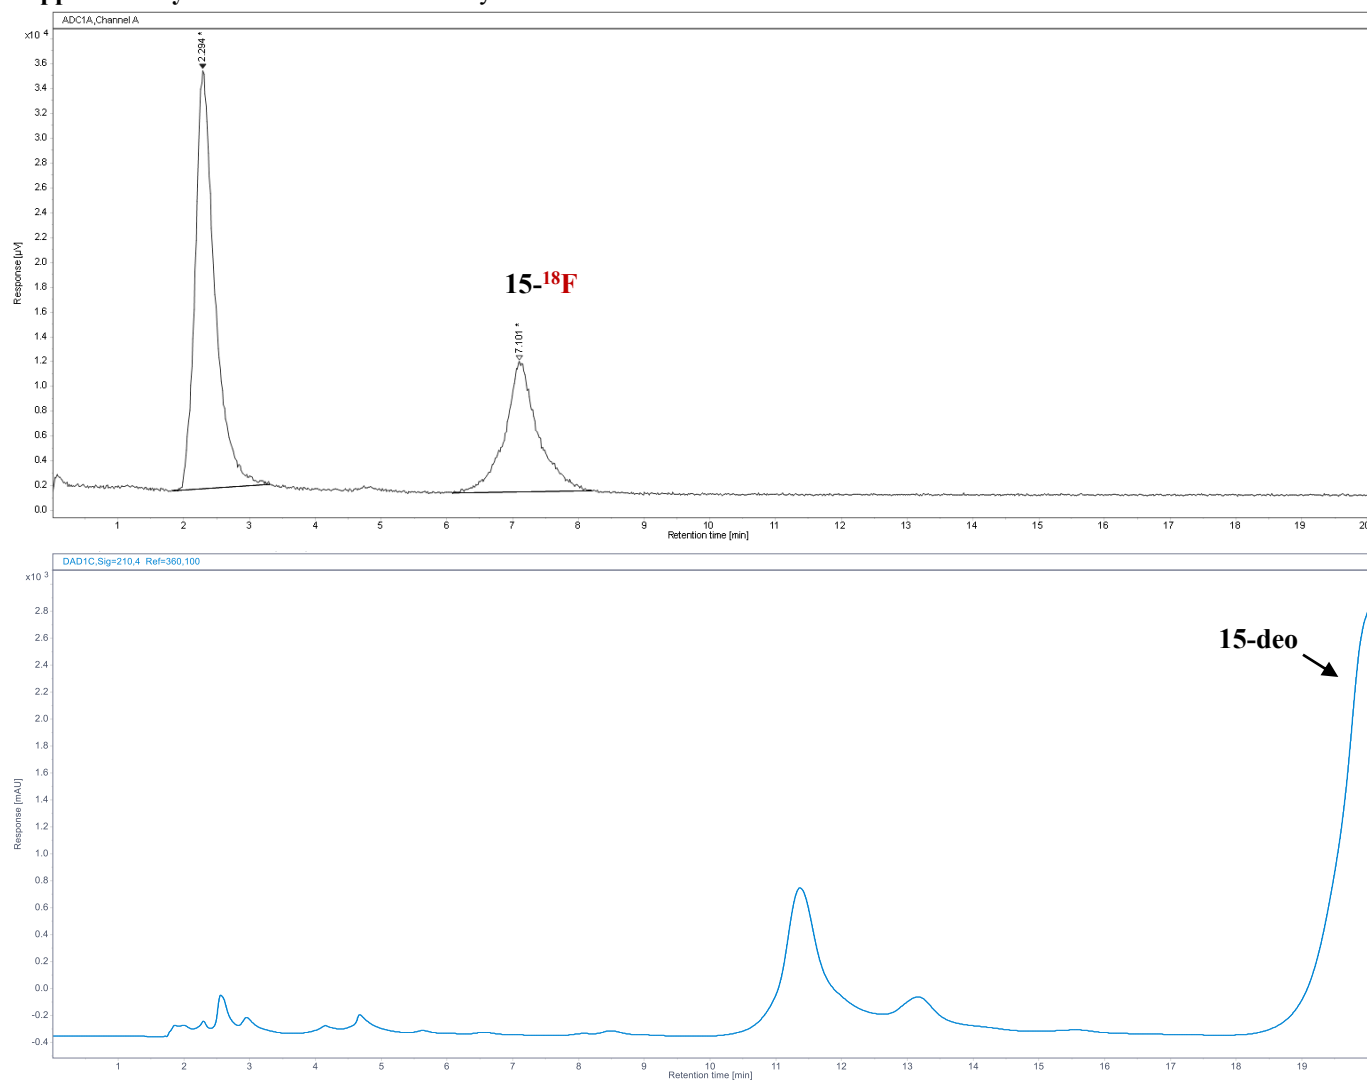

| # | RT (min) | Area (μV·s) | Area%         | Height    | Height% | Start time (min) | End time (min) |
|---|----------|-------------|---------------|-----------|---------|------------------|----------------|
| 1 | 2.294    | 700929.354  | 65.731        | 33621.792 | 76.18   | 1.830            | 3.304          |
| 2 | 7.101    | 365436.580  | <b>34.269</b> | 10510.163 | 23.82   | 6.083            | 8.202          |

**Supplementary Figure 20.** Radio-HPLC analysis of 15-<sup>18</sup>F

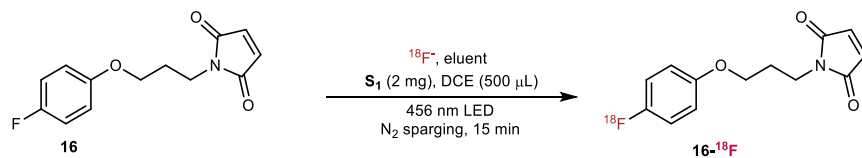

| Substrate | Product                  | Elution efficiency (EE)          | HPLC analysis conditions | RCC |
|-----------|--------------------------|----------------------------------|--------------------------|-----|
| <b>16</b> | <b>16-<sup>18</sup>F</b> | 13.8 mCi/(13.8 + 0.92) mCi = 94% | 60% MeCN                 | 48% |

**Supplementary Table 22.** Elution efficiency and RCC calculation of **16-<sup>18</sup>F**.

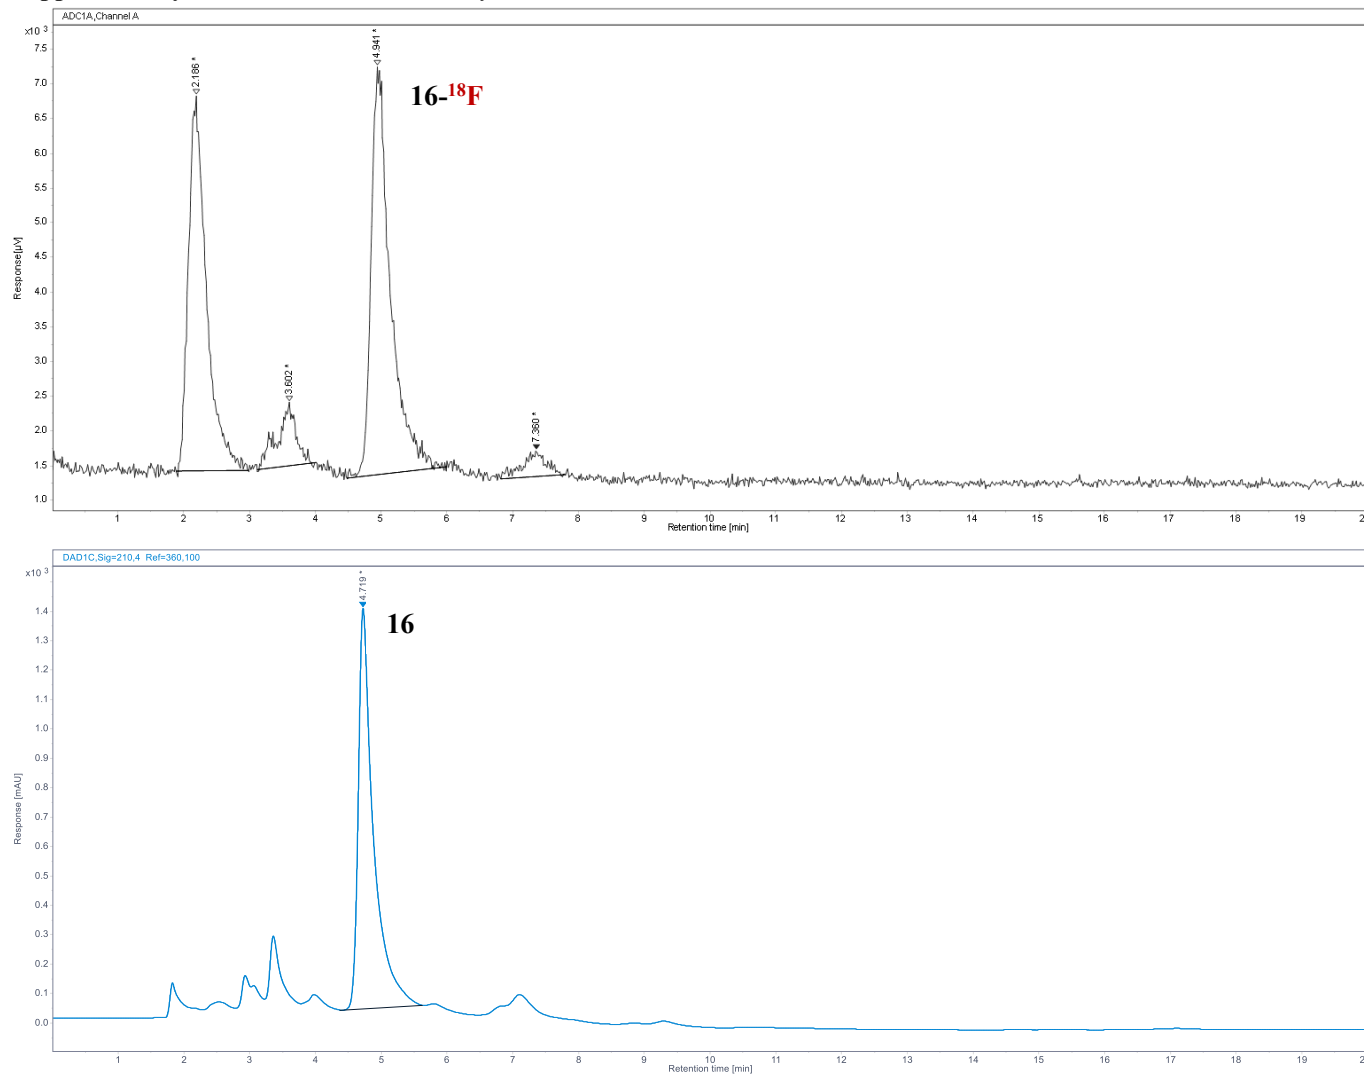

| # | RT (min) | Area (μV·s) | Area%         | Height   | Height% | Start time (min) | End time (min) |
|---|----------|-------------|---------------|----------|---------|------------------|----------------|
| 1 | 2.186    | 102802.378  | 41.204        | 5414.293 | 42.98   | 1.885            | 2.979          |
| 2 | 3.602    | 17606.580   | 7.057         | 919.978  | 7.30    | 3.116            | 4.016          |
| 3 | 4.941    | 120181.345  | <b>48.169</b> | 5890.231 | 46.76   | 4.484            | 5.996          |
| 4 | 7.360    | 8908.195    | 3.570         | 371.533  | 2.95    | 6.817            | 7.796          |

**Supplementary Figure 21.** Radio-HPLC analysis of **16-<sup>18</sup>F**

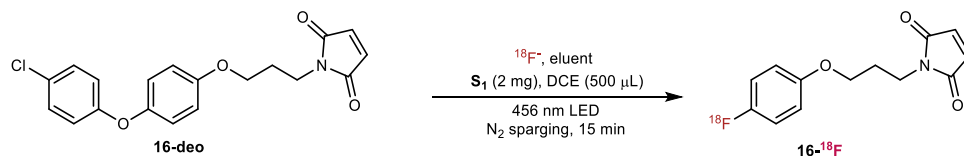

| Substrate     | Product                  | Elution efficiency (EE)        | HPLC analysis conditions | RCC              |
|---------------|--------------------------|--------------------------------|--------------------------|------------------|
| <b>16-deo</b> | <b>16-<sup>18</sup>F</b> | 3.4 mCi/(3.4 + 0.17) mCi = 95% | 60% MeCN                 | 44% <sup>a</sup> |

**Supplementary Table 23.** Elution efficiency and RCC calculation of **16-<sup>18</sup>F** from **16-deo**. A.0.02 mmol substrate.

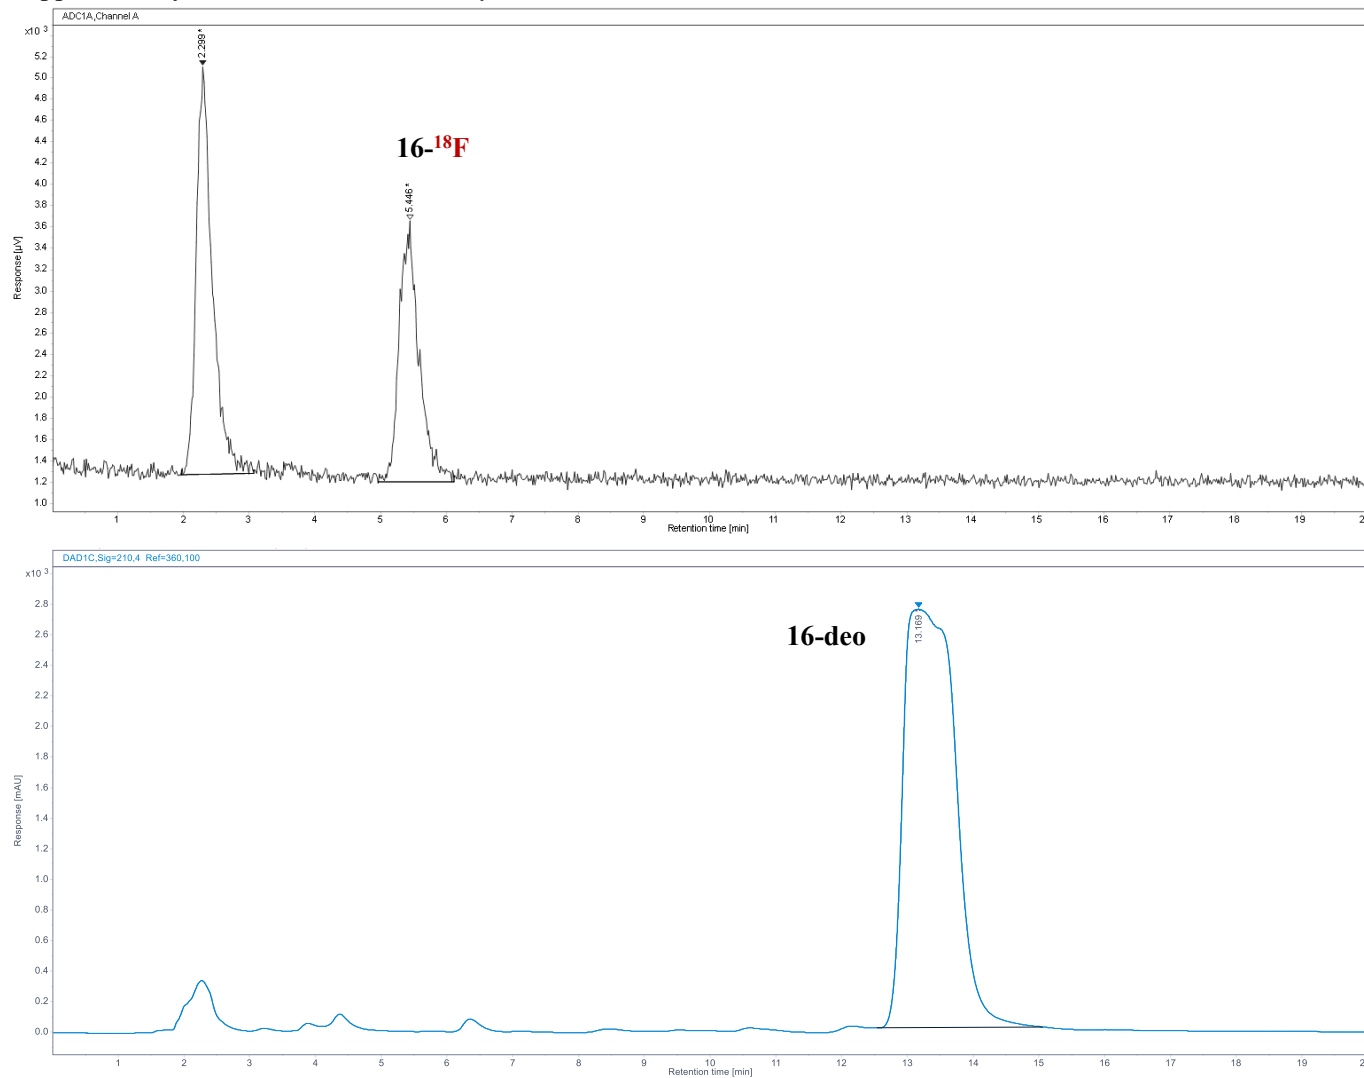

| # | RT (min) | Area (μV·s) | Area%         | Height   | Height% | Start time (min) | End time (min) |
|---|----------|-------------|---------------|----------|---------|------------------|----------------|
| 1 | 2.299    | 65623.798   | 56.487        | 3830.354 | 60.98   | 1.976            | 3.076          |
| 2 | 5.446    | 50551.753   | <b>43.513</b> | 2450.686 | 39.02   | 4.958            | 6.118          |

**Supplementary Figure 22.** Radio-HPLC analysis of **16-<sup>18</sup>F**

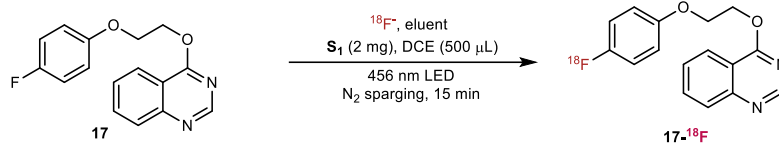

| Substrate | Product                  | Elution efficiency (EE)            | HPLC analysis conditions | RCC |
|-----------|--------------------------|------------------------------------|--------------------------|-----|
| <b>17</b> | <b>17-<sup>18</sup>F</b> | 10.32 mCi/(10.32 + 0.51) mCi = 95% | 60% MeCN                 | 58% |

**Supplementary Table 24.** Elution efficiency and RCC calculation of **17-<sup>18</sup>F**.

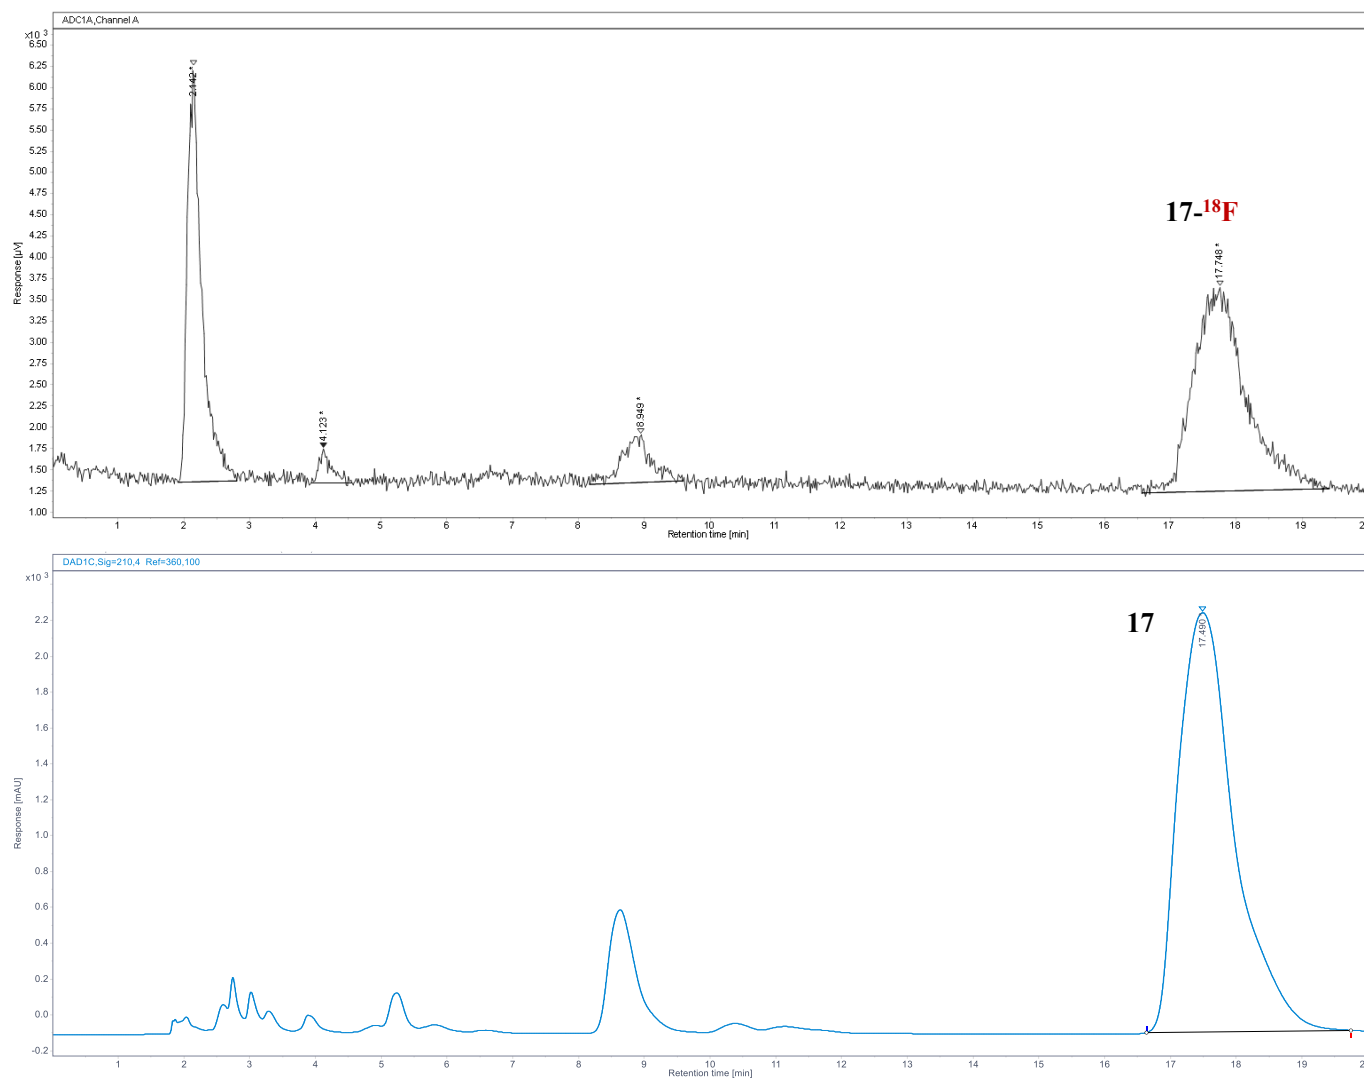

| # | RT (min) | Area (µV·s) | Area%         | Height   | Height% | Start time (min) | End time (min) |
|---|----------|-------------|---------------|----------|---------|------------------|----------------|
| 1 | 2.142    | 74298.428   | 32.482        | 4888.739 | 59.26   | 1.906            | 2.803          |
| 2 | 4.123    | 5077.350    | 2.220         | 400.591  | 4.86    | 3.934            | 4.554          |
| 3 | 8.949    | 16893.403   | 7.386         | 559.410  | 6.78    | 8.168            | 9.589          |
| 4 | 17.748   | 132466.345  | <b>57.912</b> | 2401.066 | 29.10   | 16.568           | 19.410         |

**Supplementary Figure 23.** Radio-HPLC analysis of **17-<sup>18</sup>F**

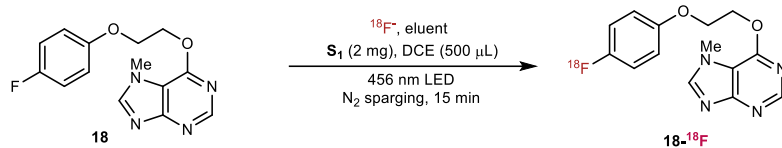

| Substrate | Product                  | Elution efficiency (EE)          | HPLC analysis conditions | RCC |
|-----------|--------------------------|----------------------------------|--------------------------|-----|
| <b>18</b> | <b>18-<sup>18</sup>F</b> | 7.92 mCi/(7.92 + 0.57) mCi = 93% | 50% MeCN                 | 42% |

**Supplementary Table 25.** Elution efficiency and RCC calculation of **18-<sup>18</sup>F**.

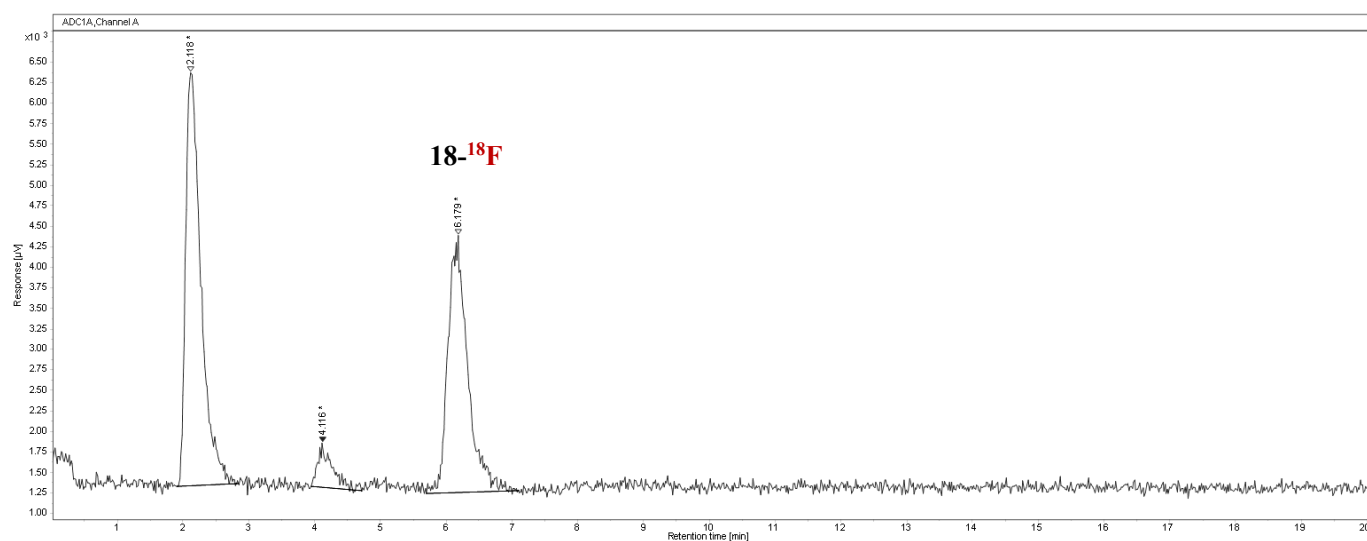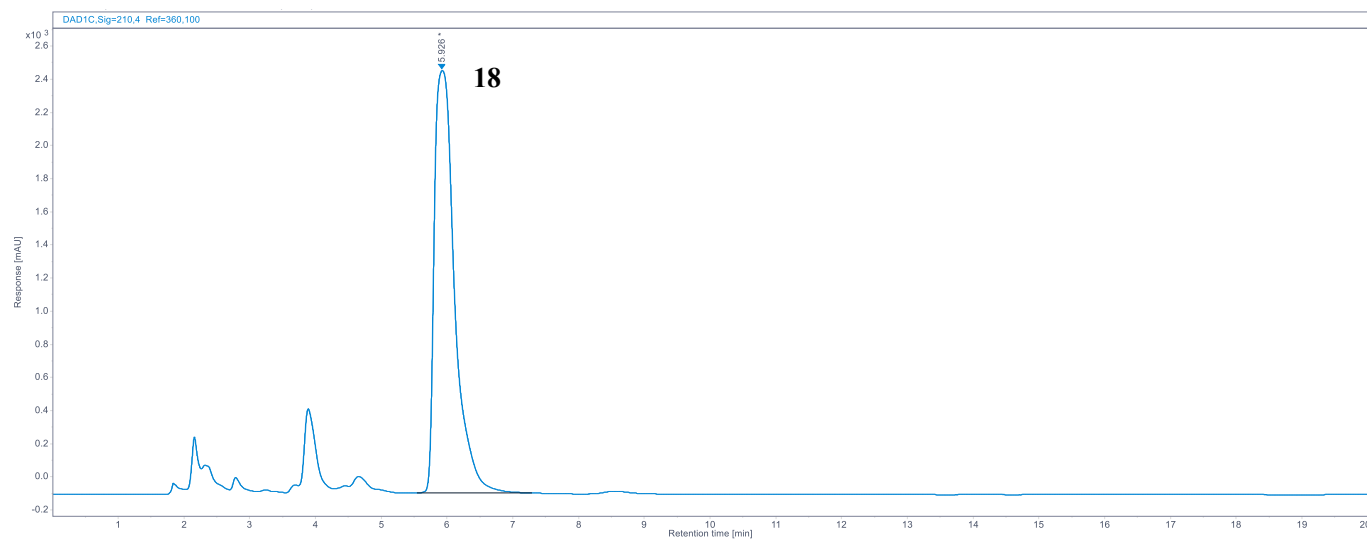

| # | RT (min) | Area ( $\mu\text{V}\cdot\text{s}$ ) | Area%         | Height   | Height% | Start time (min) | End time (min) |
|---|----------|-------------------------------------|---------------|----------|---------|------------------|----------------|
| 1 | 2.118    | 81454.533                           | 52.603        | 5033.862 | 57.83   | 1.904            | 2.842          |
| 2 | 4.116    | 8045.685                            | 5.196         | 535.578  | 6.15    | 3.945            | 4.718          |
| 3 | 6.179    | 65347.047                           | <b>42.201</b> | 3134.890 | 36.02   | 5.697            | 7.104          |

**Supplementary Figure 24.** Radio-HPLC analysis of **18-<sup>18</sup>F**



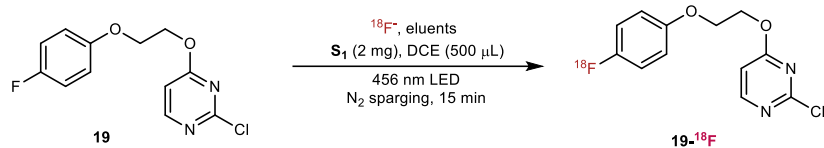

| Substrate | Product                  | Elution efficiency (EE)         | HPLC analysis conditions | RCC |
|-----------|--------------------------|---------------------------------|--------------------------|-----|
| <b>19</b> | <b>19-<sup>18</sup>F</b> | 30.9 mCi/(30.9 + 2.1) mCi = 94% | 65% MeCN                 | 54% |

**Supplementary Table 26.** Elution efficiency and RCC calculation of **19-<sup>18</sup>F**.

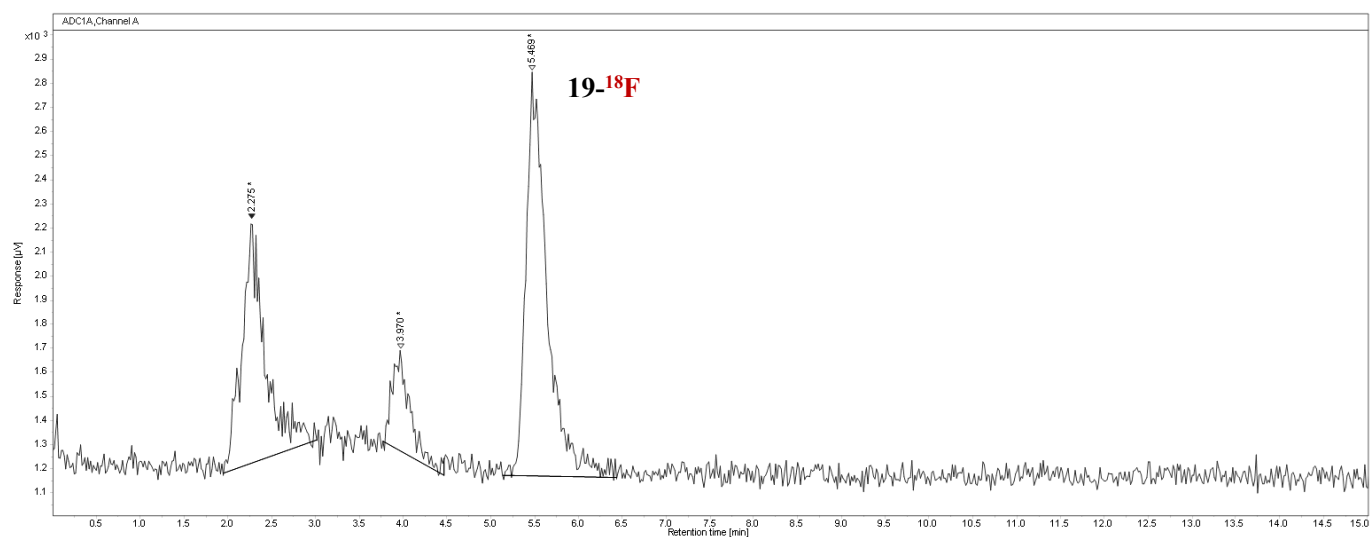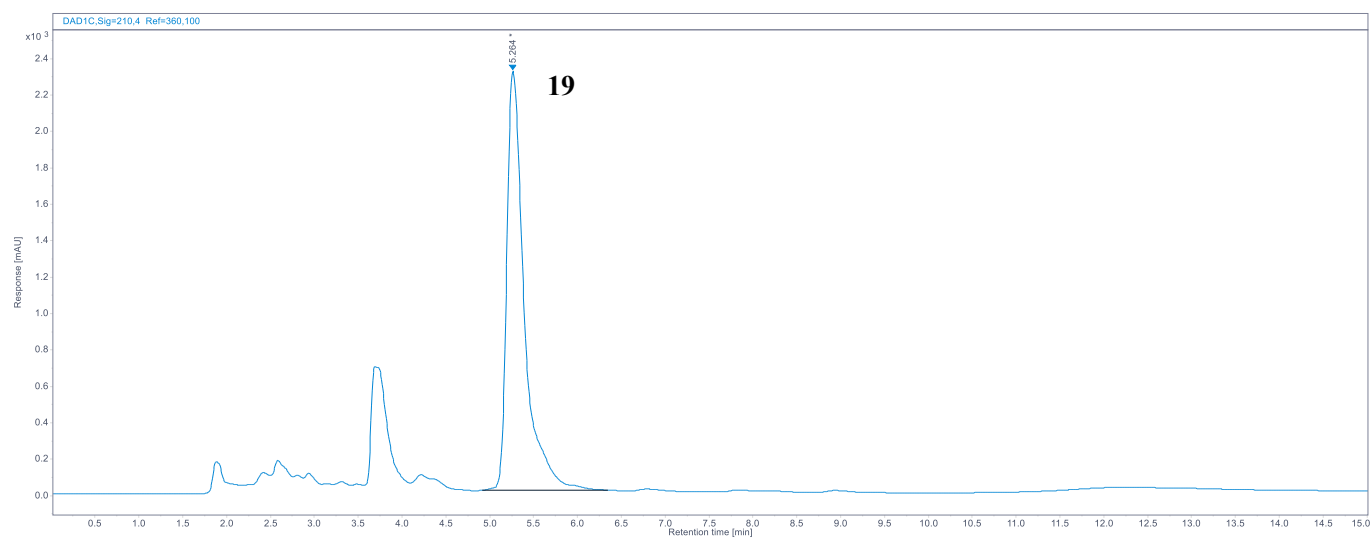

| # | RT (min) | Area (μV·s) | Area%         | Height   | Height% | Start time (min) | End time (min) |
|---|----------|-------------|---------------|----------|---------|------------------|----------------|
| 1 | 2.275    | 18241.605   | 35.128        | 1007.116 | 32.42   | 1.947            | 3.018          |
| 2 | 3.970    | 5821.588    | 11.211        | 421.286  | 13.56   | 3.767            | 4.469          |
| 3 | 5.469    | 27866.232   | <b>53.662</b> | 1678.136 | 54.02   | 5.137            | 6.439          |

**Supplementary Figure 25.** Radio-HPLC analysis of **19-<sup>18</sup>F**.

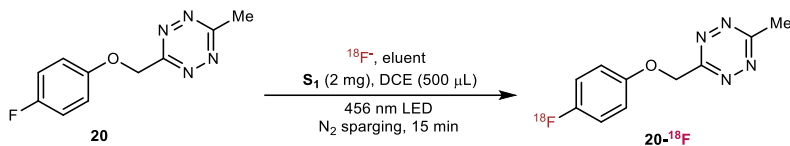

| Substrate | Product                  | Elution efficiency (EE)            | HPLC analysis conditions | RCC              |
|-----------|--------------------------|------------------------------------|--------------------------|------------------|
| <b>20</b> | <b>20-<sup>18</sup>F</b> | 7.82 mCi / (7.82 + 0.23) mCi = 97% | 60% MeCN                 | 18% <sup>a</sup> |

**Supplementary Table 27.** Elution efficiency and RCC calculation of **20-<sup>18</sup>F**. <sup>a</sup>0.02 mmol substrate was used.

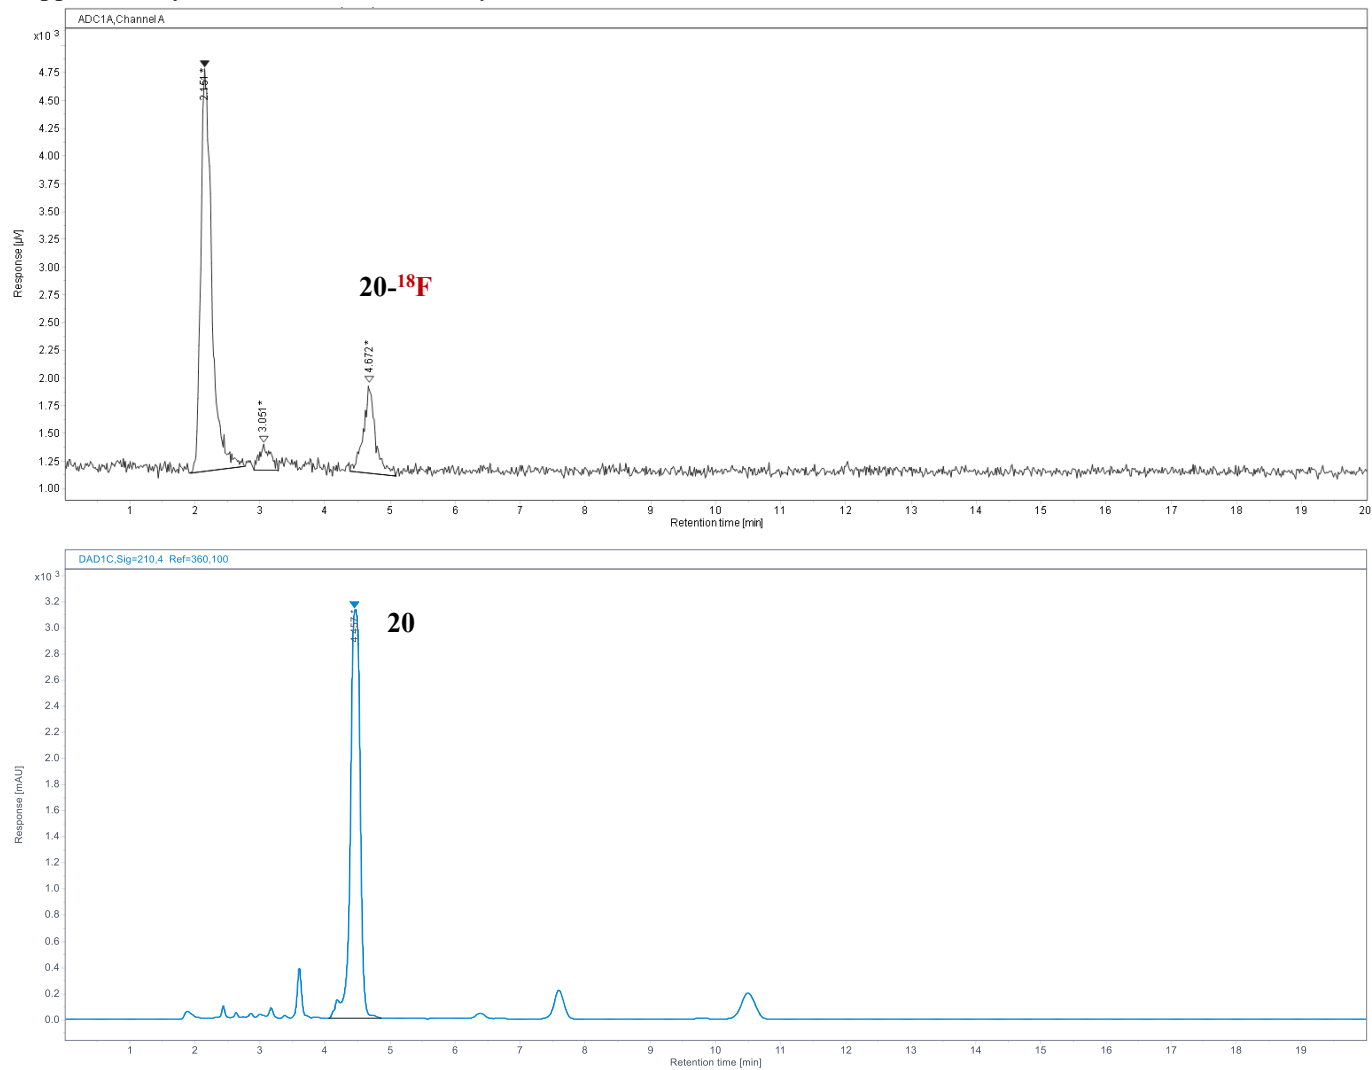

| # | RT (min) | Area (μV·s) | Area%         | Height   | Height% | Start time (min) | End time (min) |
|---|----------|-------------|---------------|----------|---------|------------------|----------------|
| 1 | 2.151    | 42564.037   | 76.994        | 3627.583 | 77.89   | 1.929            | 2.762          |
| 2 | 3.051    | 2683.414    | 4.854         | 229.807  | 4.93    | 2.901            | 3.286          |
| 3 | 4.672    | 10034.751   | <b>18.152</b> | 799.777  | 17.17   | 4.384            | 5.086          |

**Supplementary Figure 26.** Radio-HPLC analysis of **20-<sup>18</sup>F**.

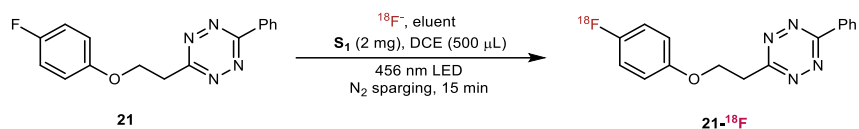

| Substrate | Product                  | Elution efficiency (EE)        | HPLC analysis conditions | RCC              |
|-----------|--------------------------|--------------------------------|--------------------------|------------------|
| <b>21</b> | <b>21-<sup>18</sup>F</b> | 9.39 mCi/(9.39 + 0.25) mCi=97% | 70% MeCN                 | 18% <sup>a</sup> |

**Supplementary Table 28.** Elution efficiency and RCC calculation of **21-<sup>18</sup>F**. <sup>a</sup>0.02 mmol substrate was used.

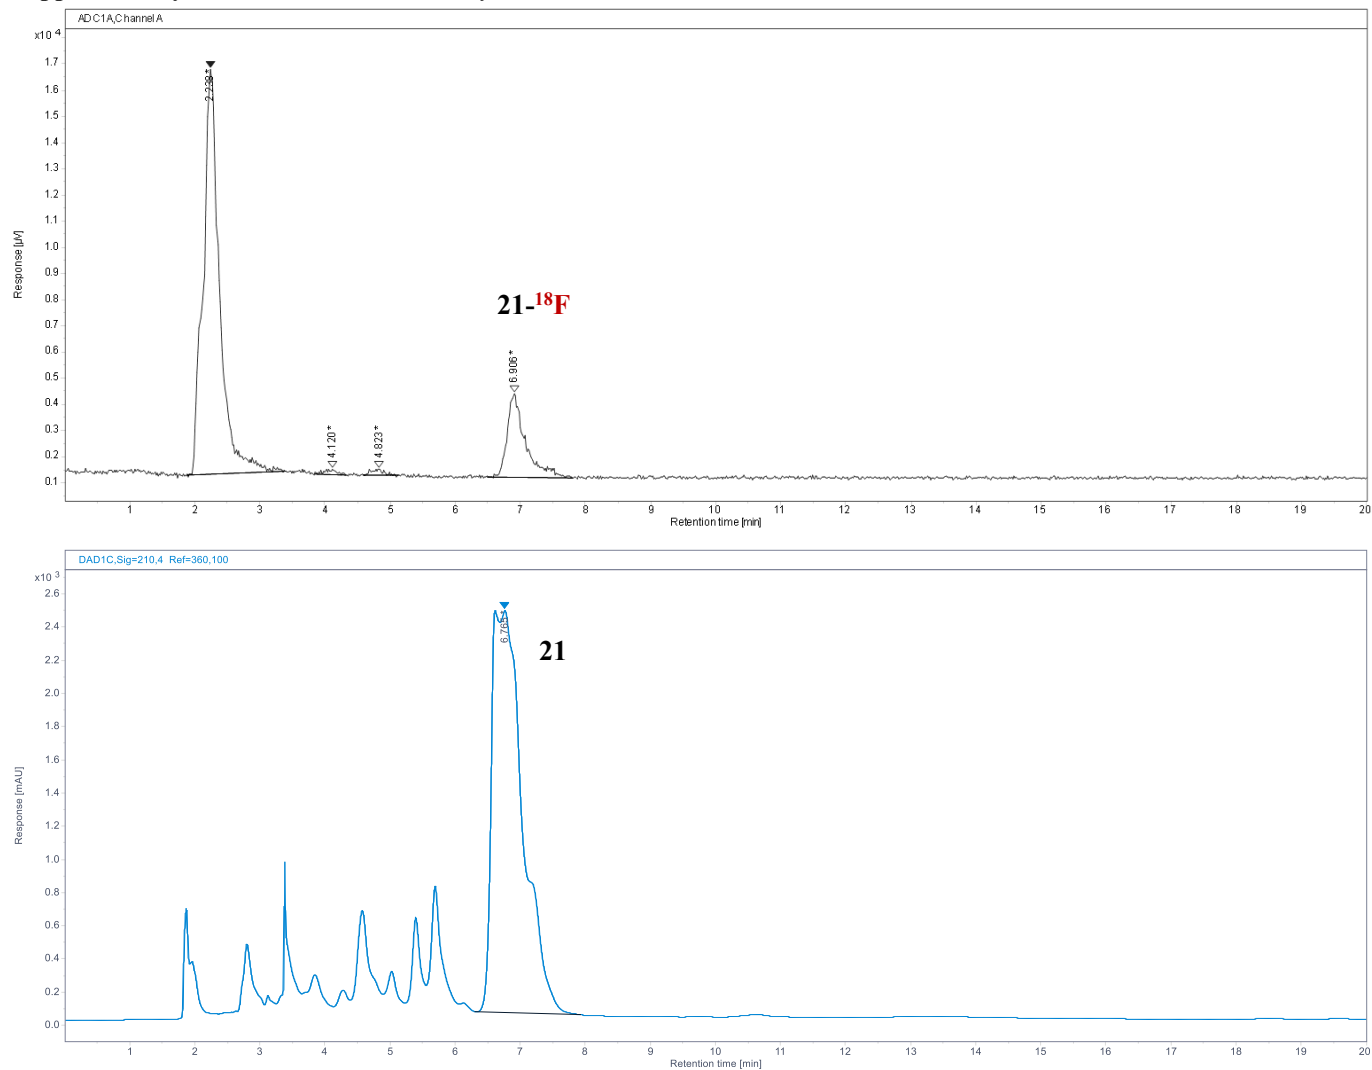

| # | RT (min) | Area ( $\mu\text{V} \cdot \text{s}$ ) | Area%         | Height    | Height% | Start time (min) | End time (min) |
|---|----------|---------------------------------------|---------------|-----------|---------|------------------|----------------|
| 1 | 2.238    | 269865.439                            | 80.327        | 15473.357 | 81.03   | 1.880            | 3.400          |
| 2 | 4.120    | 2438.460                              | 0.726         | 214.414   | 1.12    | 3.845            | 4.317          |
| 3 | 4.823    | 2862.743                              | 0.852         | 244.135   | 1.28    | 4.586            | 5.124          |
| 4 | 6.906    | 60791.349                             | <b>18.095</b> | 3163.832  | 16.57   | 6.496            | 7.803          |

**Supplementary Figure 27.** Radio-HPLC analysis of **21-<sup>18</sup>F**.

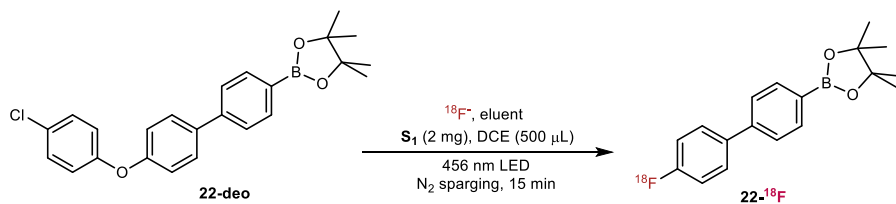

| Substrate | Product             | Elution efficiency (EE)          | HPLC analysis conditions | RCC |
|-----------|---------------------|----------------------------------|--------------------------|-----|
| 22-deo    | 22- <sup>18</sup> F | 9.82 mCi/(9.82 + 2.87) mCi = 77% | 70% MeCN                 | 41% |

**Supplementary Table 29.** Elution efficiency and RCC calculation of 22-<sup>18</sup>F from 22-deo.

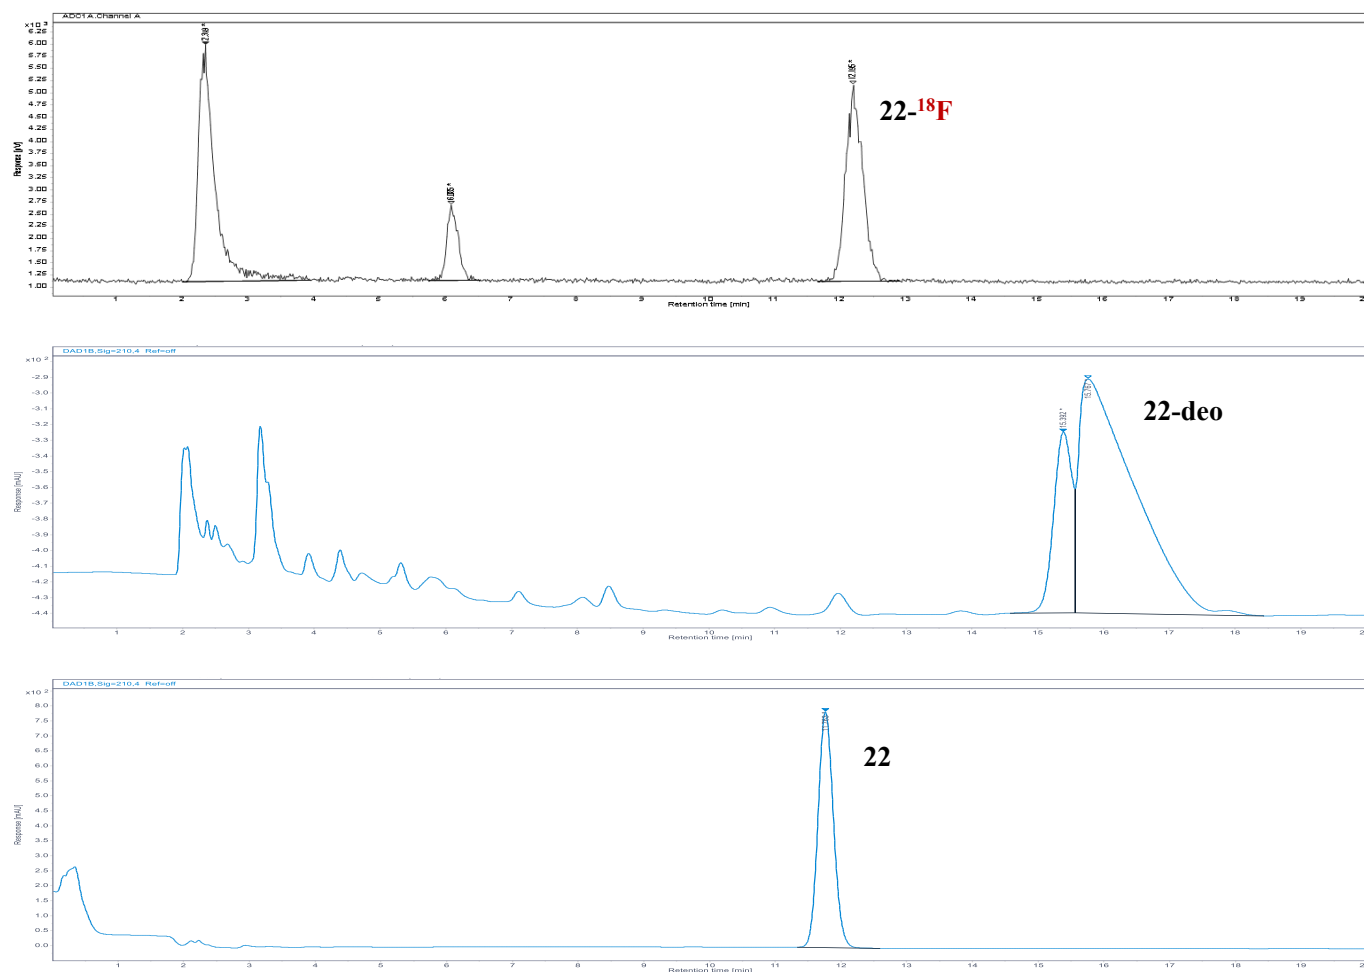

| # | RT (min) | Area (μV·s) | Area%         | Height   | Height% | Start time (min) | End time (min) |
|---|----------|-------------|---------------|----------|---------|------------------|----------------|
| 1 | 2.349    | 85386.472   | 48.289        | 4864.557 | 46.45   | 2.007            | 3.947          |
| 2 | 6.085    | 18702.693   | 10.577        | 1558.694 | 14.88   | 5.745            | 6.529          |
| 3 | 12.195   | 72735.810   | <b>41.134</b> | 4048.518 | 38.66   | 11.654           | 12.900         |

**Supplementary Figure 27.** Radio-HPLC analysis of 22-<sup>18</sup>F.

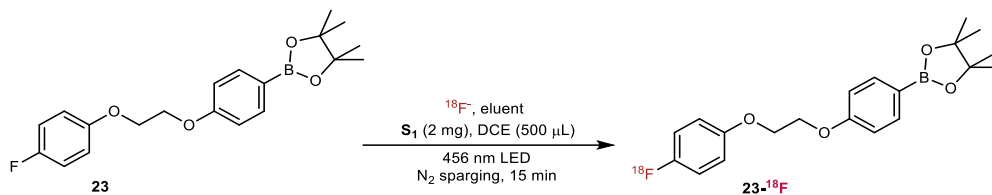

| Substrate | Product             | Elution efficiency (EE)          | HPLC analysis conditions | RCC |
|-----------|---------------------|----------------------------------|--------------------------|-----|
| 23        | 23- <sup>18</sup> F | 8.92 mCi/(8.92 + 0.43) mCi = 95% | 70% MeCN                 | 13% |

**Supplementary Table 30.** Elution efficiency and RCC calculation of 23-<sup>18</sup>F.

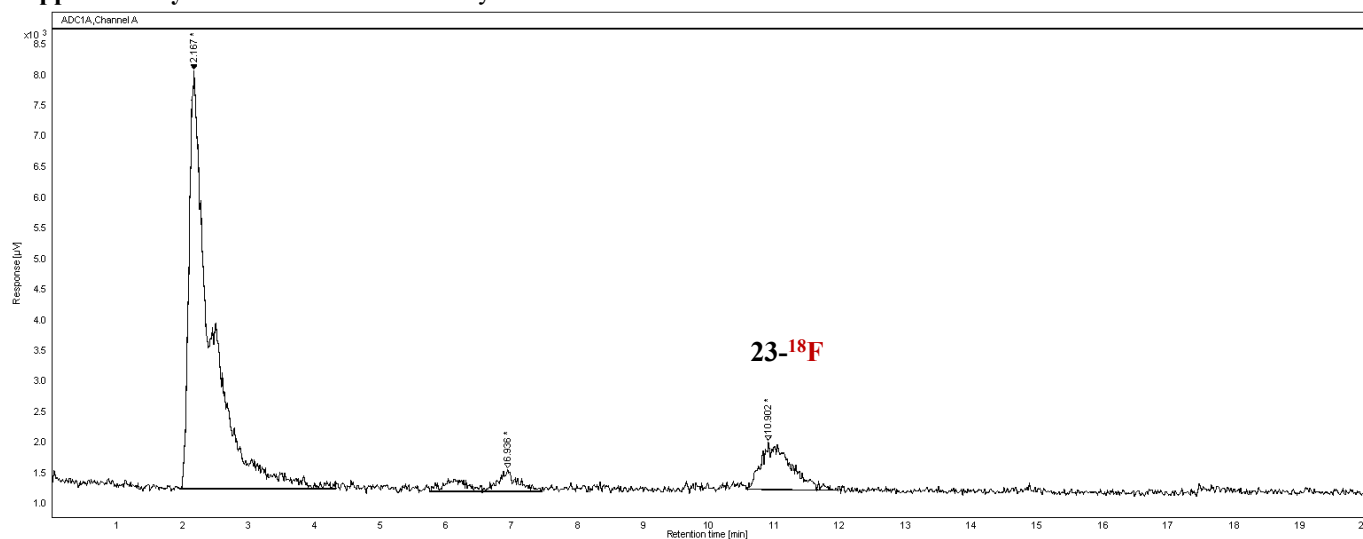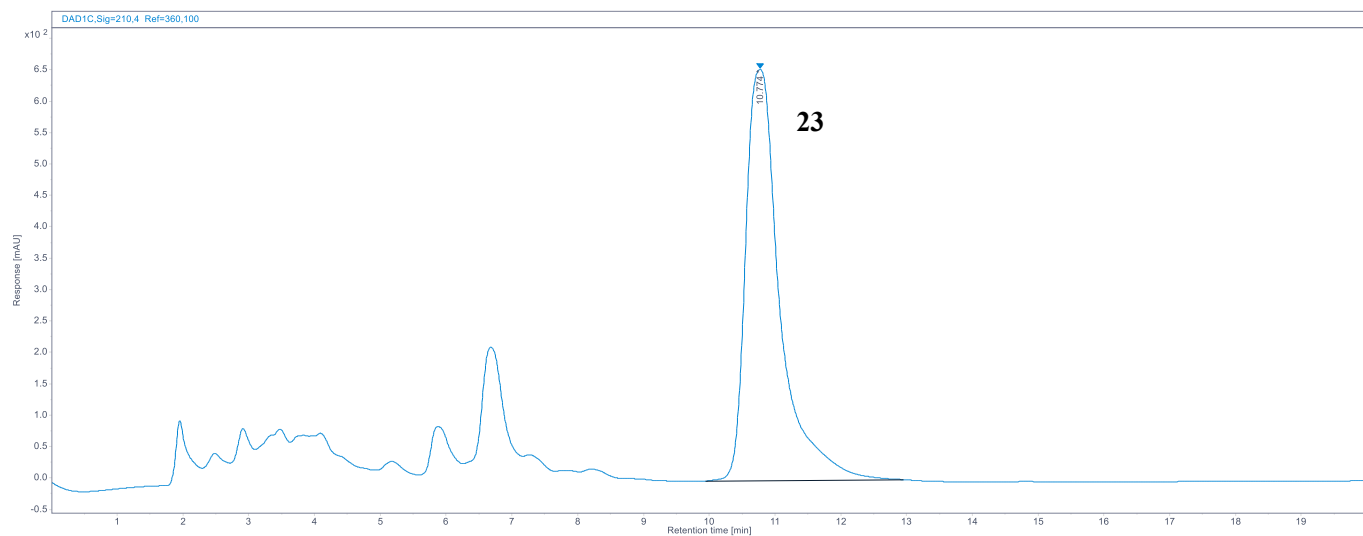

| # | RT (min) | Area (μV·s) | Area%         | Height   | Height% | Start time (min) | End time (min) |
|---|----------|-------------|---------------|----------|---------|------------------|----------------|
| 1 | 2.167    | 156557.134  | 81.269        | 6824.923 | 85.76   | 1.953            | 4.322          |
| 2 | 6.936    | 11974.361   | 6.216         | 354.728  | 4.46    | 5.761            | 7.455          |
| 3 | 10.902   | 24109.563   | <b>12.515</b> | 778.259  | 9.78    | 10.565           | 11.945         |

**Supplementary Figure 28.** Radio-HPLC analysis of 23-<sup>18</sup>F.

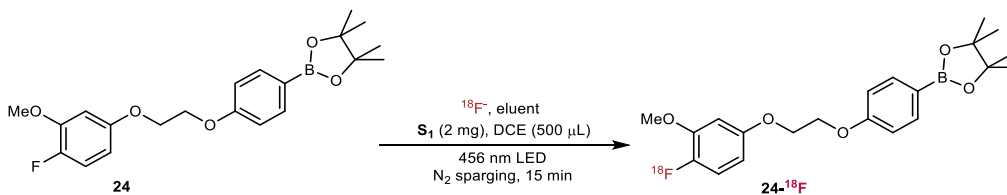

| Substrate | Product                  | Elution efficiency (EE)        | HPLC analysis conditions | RCC |
|-----------|--------------------------|--------------------------------|--------------------------|-----|
| <b>24</b> | <b>24-<sup>18</sup>F</b> | 7.6 mCi/(7.6 + 0.52) mCi = 94% | 65% MeCN (column B)      | 27% |

**Supplementary Table 31.** Elution efficiency and RCC calculation of **24-<sup>18</sup>F**.

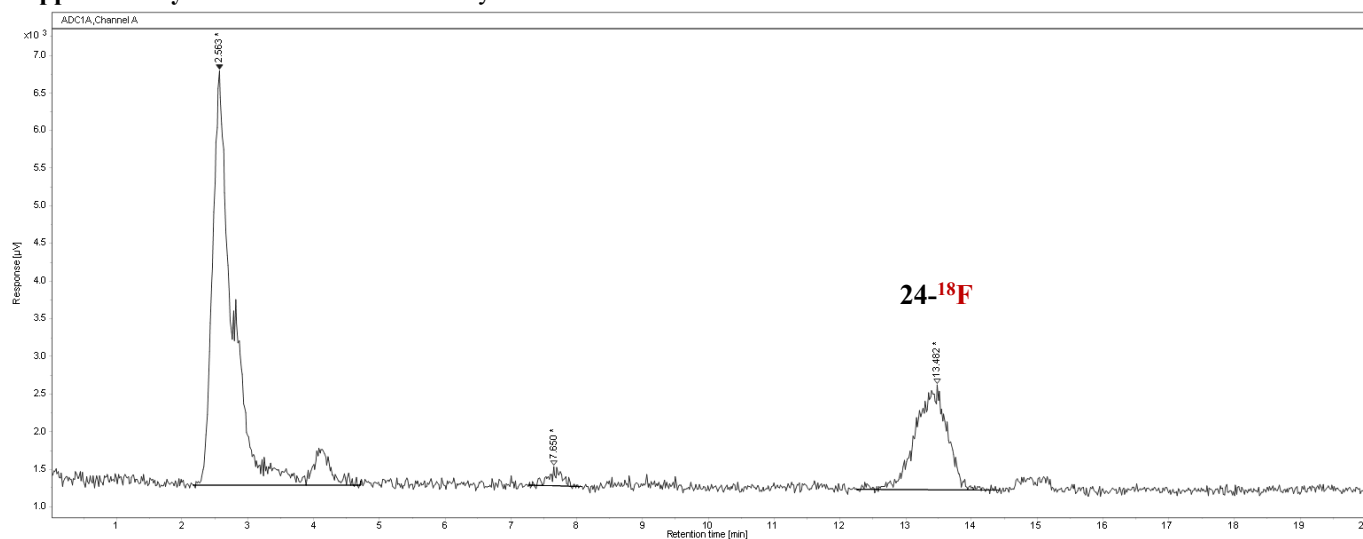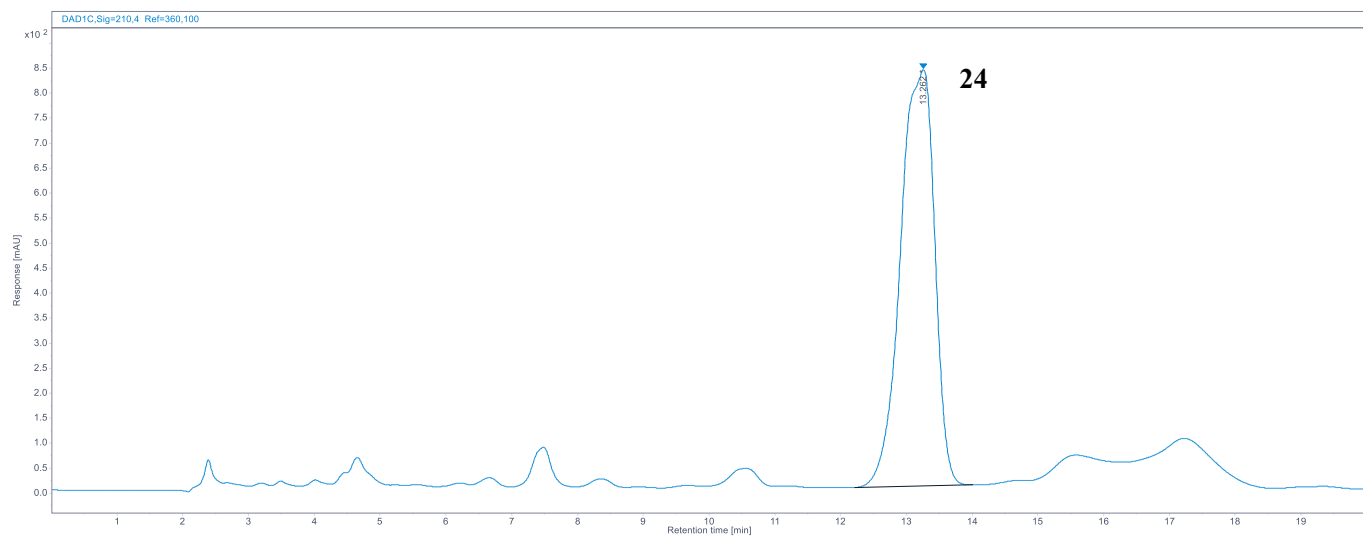

| # | RT (min) | Area (µV·s) | Area%         | Height   | Height% | Start time (min) | End time (min) |
|---|----------|-------------|---------------|----------|---------|------------------|----------------|
| 1 | 2.563    | 123192.173  | 71.510        | 5502.308 | 77.00   | 2.166            | 4.718          |
| 2 | 7.650    | 3262.465    | 1.894         | 253.539  | 3.55    | 7.269            | 8.074          |
| 3 | 13.482   | 45818.485   | <b>26.596</b> | 1389.788 | 19.45   | 12.258           | 14.419         |

**Supplementary Figure 29.** Radio-HPLC analysis of **24-<sup>18</sup>F**.

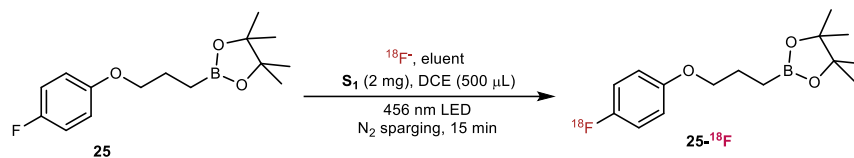

| Substrate | Product                  | Elution efficiency (EE)          | HPLC analysis conditions | RCC              |
|-----------|--------------------------|----------------------------------|--------------------------|------------------|
| <b>25</b> | <b>25-<sup>18</sup>F</b> | 9.64 mCi/(9.64 + 0.34) mCi = 97% | 65% MeCN                 | 20% <sup>a</sup> |

**Supplementary Table 32.** Elution efficiency and RCC calculation of **25-<sup>18</sup>F**. a.0.02 mmol substrate.

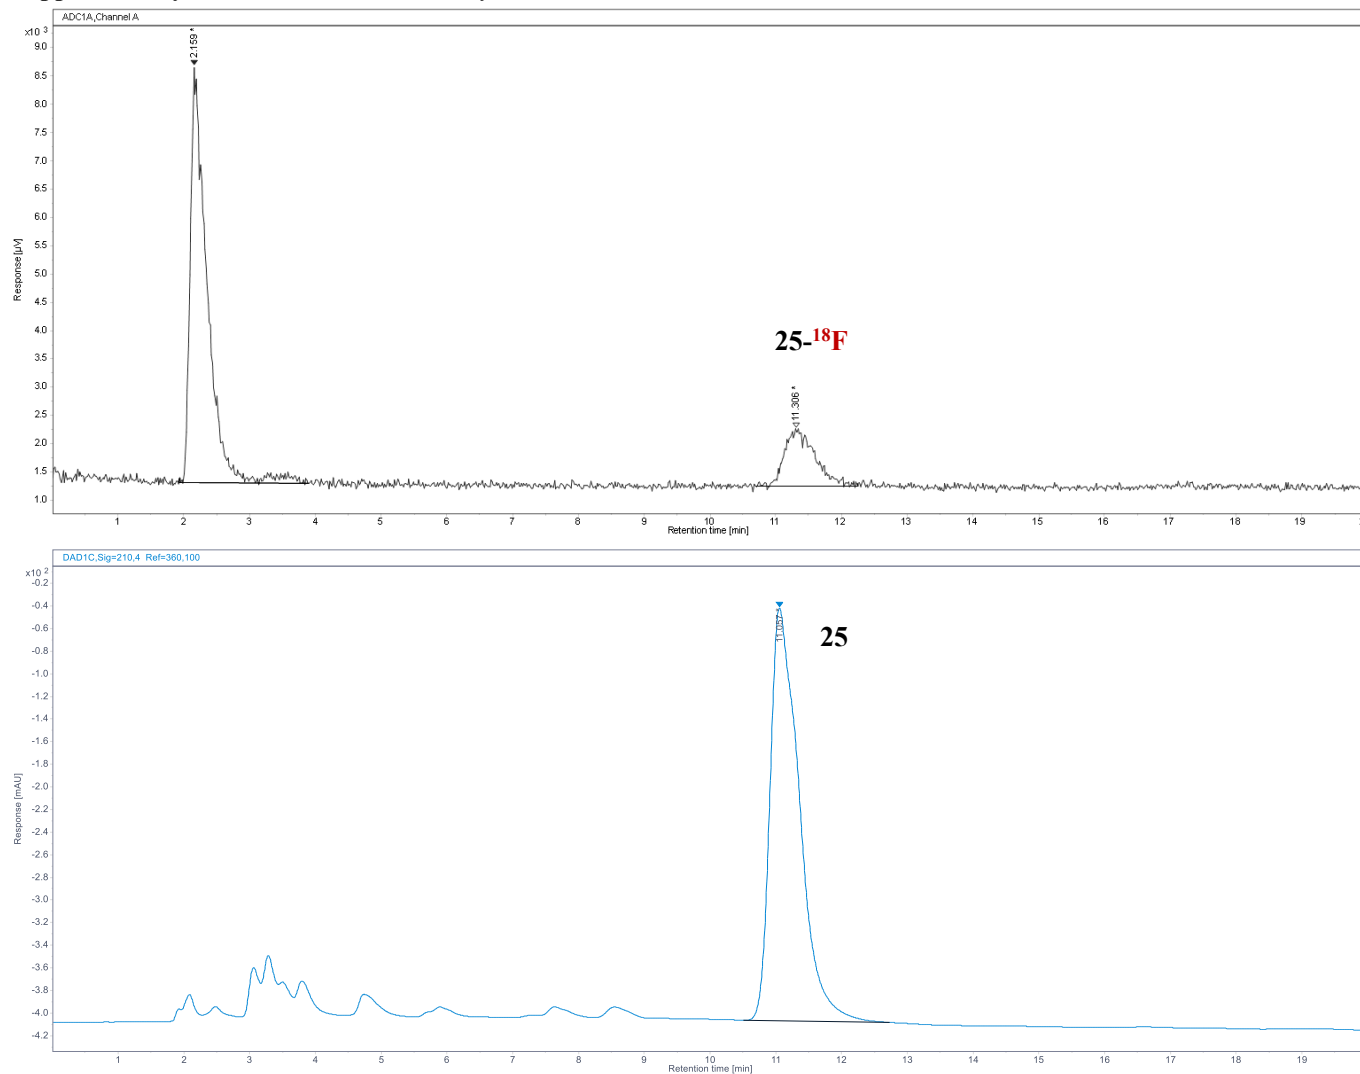

| # | RT (min) | Area (μV·s) | Area%         | Height   | Height% | Start time (min) | End time (min) |
|---|----------|-------------|---------------|----------|---------|------------------|----------------|
| 1 | 2.159    | 131316.125  | 80.004        | 7369.335 | 87.78   | 1.936            | 3.894          |
| 2 | 11.306   | 32821.755   | <b>19.996</b> | 1026.155 | 12.22   | 10.699           | 12.248         |

**Supplementary Figure 30.** Radio-HPLC analysis of **25-<sup>18</sup>F**.

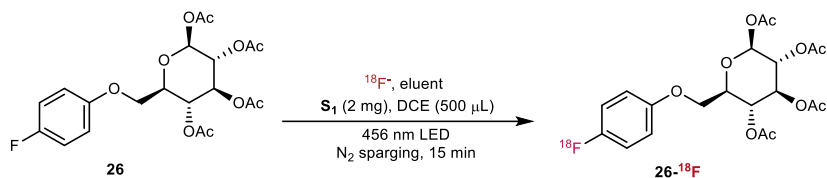

| Substrate | Product                  | Elution efficiency (EE)        | HPLC analysis conditions | RCC |
|-----------|--------------------------|--------------------------------|--------------------------|-----|
| <b>26</b> | <b>26-<sup>18</sup>F</b> | 7.6 mCi/(7.6 + 0.11) mCi = 99% | 55% MeCN                 | 29% |

**Supplementary Table 33.** Elution efficiency and RCC calculation of **26-<sup>18</sup>F**.

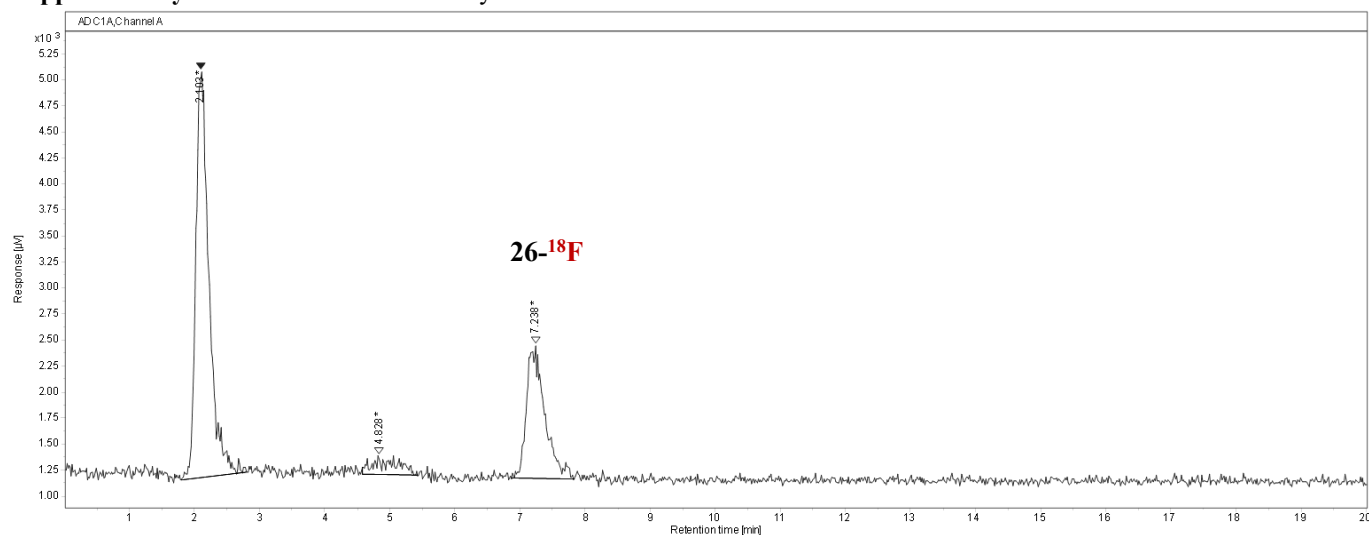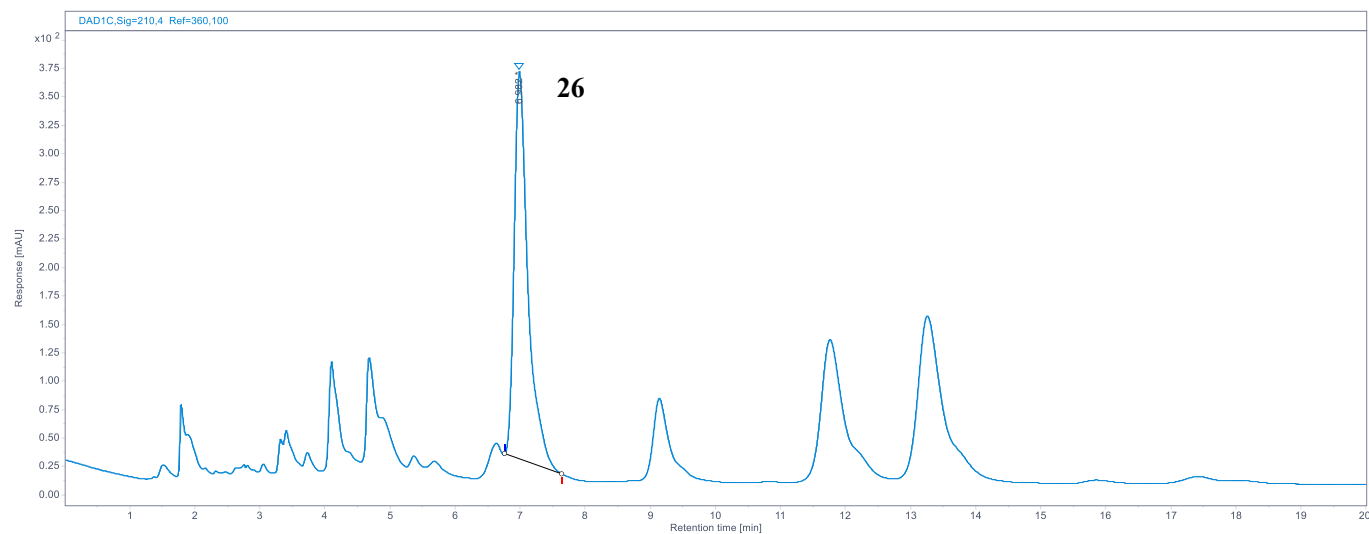

| # | RT (min) | Area (µV·s) | Area%         | Height   | Height% | Start time (min) | End time (min) |
|---|----------|-------------|---------------|----------|---------|------------------|----------------|
| 1 | 2.103    | 55048.549   | 65.441        | 3911.379 | 72.82   | 1.794            | 2.803          |
| 2 | 4.828    | 4372.555    | 5.198         | 179.297  | 3.34    | 4.577            | 5.433          |
| 3 | 7.238    | 24698.884   | <b>29.361</b> | 1280.725 | 23.84   | 6.868            | 7.833          |

**Supplementary Figure 31.** Radio-HPLC analysis of **26-<sup>18</sup>F**.



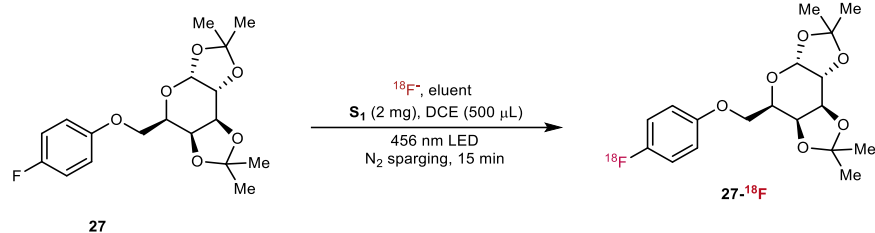

| Substrate | Product             | Elution efficiency (EE)           | HPLC analysis conditions | RCC |
|-----------|---------------------|-----------------------------------|--------------------------|-----|
| 27        | 27- <sup>18</sup> F | 10.8 mCi/(10.48 + 0.45) mCi = 96% | 55% MeCN                 | 45% |

**Supplementary Table 34.** Elution efficiency and RCC calculation of 27-<sup>18</sup>F.

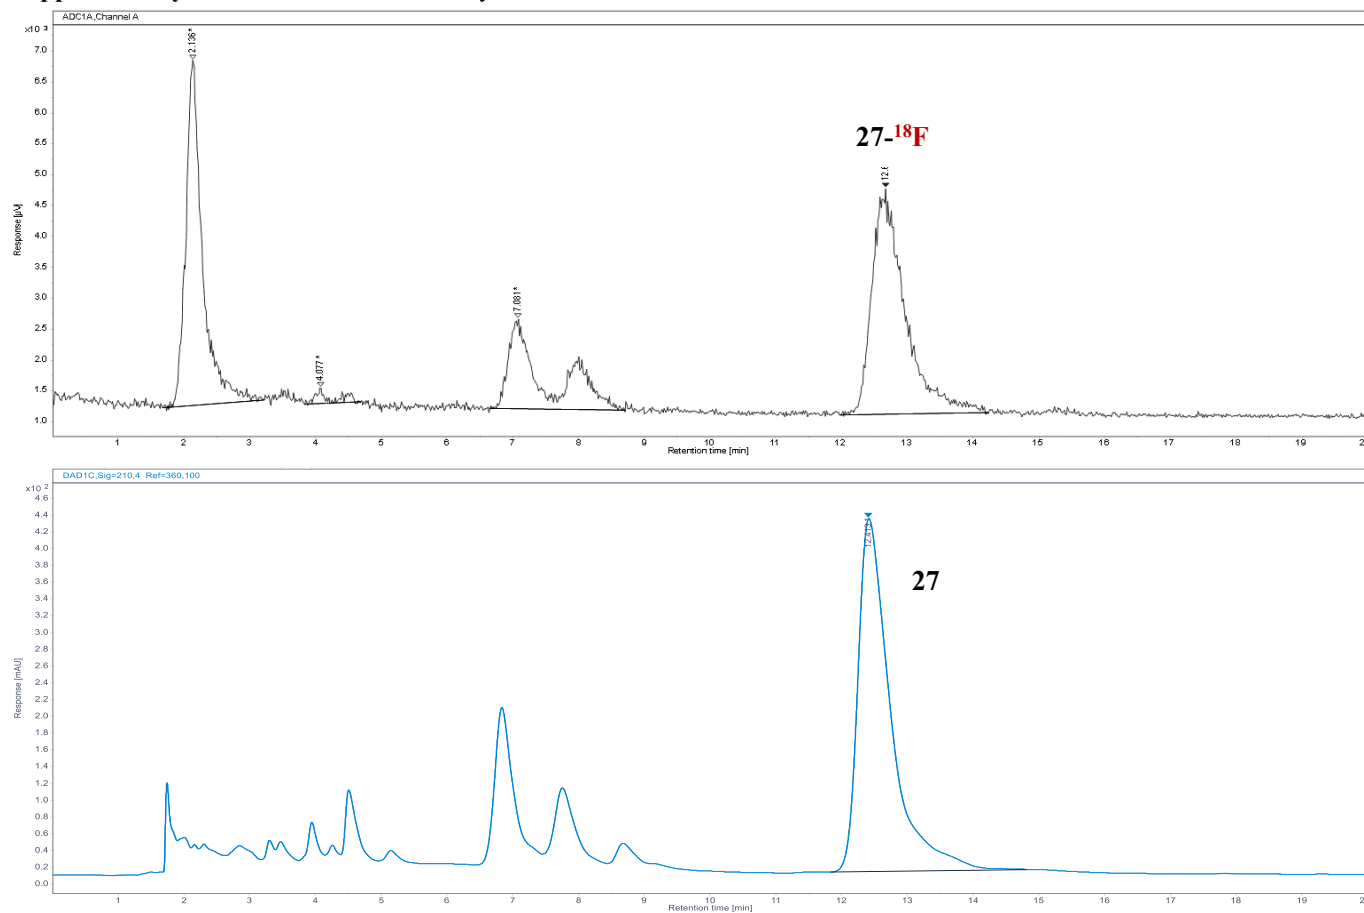

| # | RT (min) | Area (μV·s) | Area%         | Height   | Height% | Start time (min) | End time (min) |
|---|----------|-------------|---------------|----------|---------|------------------|----------------|
| 1 | 2.136    | 98669.333   | 34.775        | 5584.544 | 50.95   | 1.685            | 3.216          |
| 2 | 4.077    | 3831.479    | 1.350         | 256.179  | 2.34    | 3.836            | 4.692          |
| 3 | 7.081    | 54424.362   | 19.181        | 1459.018 | 13.31   | 6.650            | 8.705          |
| 4 | 12.665   | 126814.889  | <b>44.694</b> | 3661.634 | 33.40   | 11.974           | 14.236         |

**Supplementary Figure 32.** Radio-HPLC analysis of 27-<sup>18</sup>F.

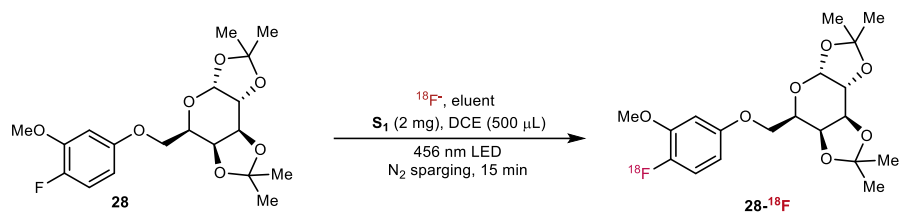

| Substrate | Product                  | Elution efficiency (EE)              | HPLC analysis conditions | RCC |
|-----------|--------------------------|--------------------------------------|--------------------------|-----|
| <b>28</b> | <b>28-<sup>18</sup>F</b> | 12.18 mCi / (12.18 + 0.41) mCi = 97% | 60% MeCN                 | 62% |

**Supplementary Table 35.** Elution efficiency and RCC calculation of **28-<sup>18</sup>F**.

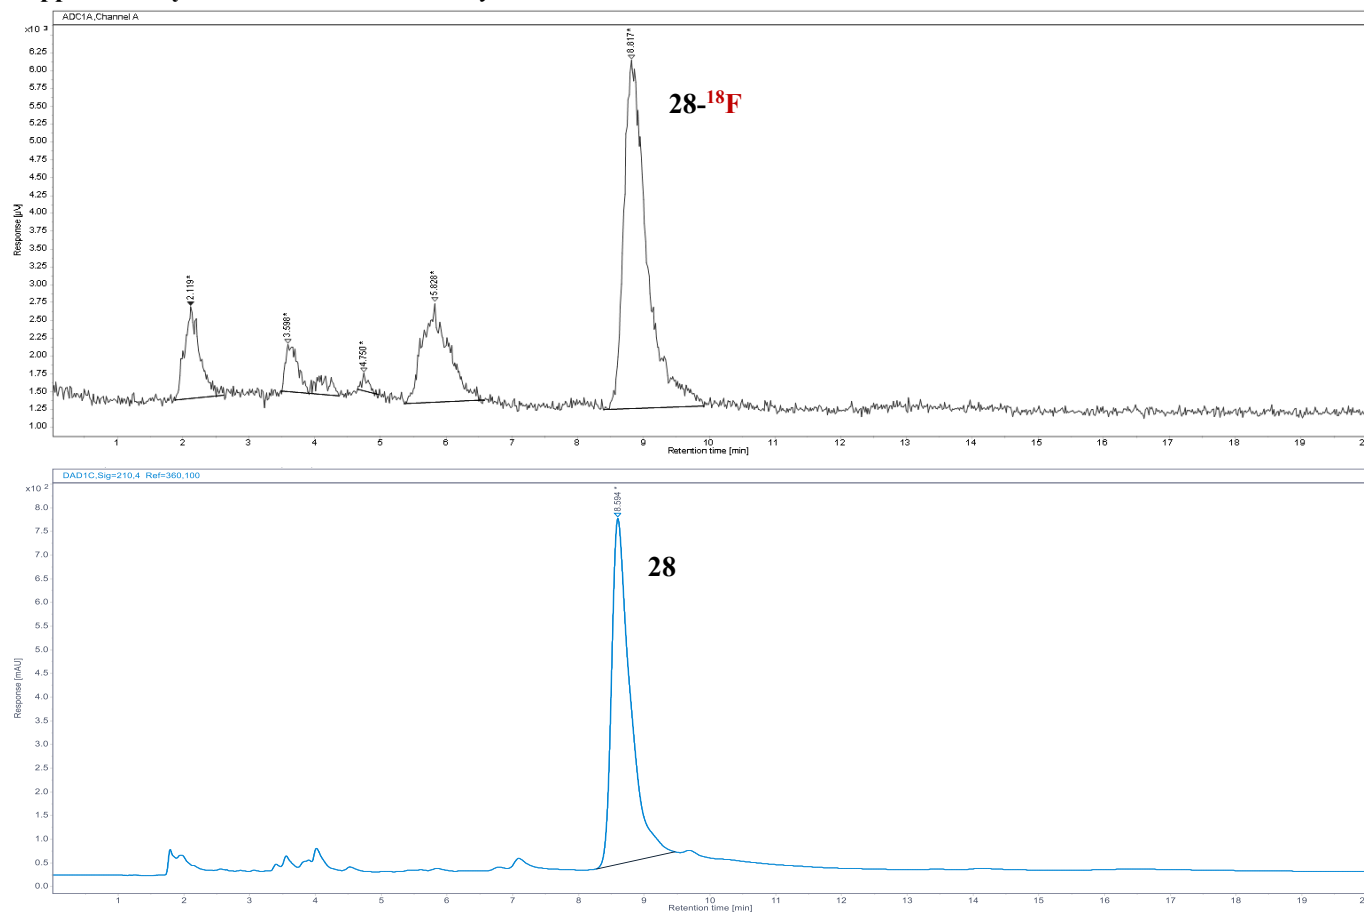

| # | RT (min) | Area (μV·s) | Area%         | Height   | Height% | Start time (min) | End time (min) |
|---|----------|-------------|---------------|----------|---------|------------------|----------------|
| 1 | 2.119    | 20880.602   | 10.876        | 1288.180 | 15.20   | 1.879            | 2.627          |
| 2 | 3.598    | 12375.068   | 6.445         | 658.876  | 7.78    | 3.485            | 4.363          |
| 3 | 4.750    | 1518.560    | 0.791         | 247.124  | 2.92    | 4.652            | 4.971          |
| 4 | 5.828    | 37968.432   | 19.776        | 1399.080 | 16.51   | 5.371            | 6.568          |
| 5 | 8.817    | 119253.337  | <b>62.112</b> | 4880.962 | 57.60   | 8.403            | 9.920          |

**Supplementary Figure 33.** Radio-HPLC analysis of **28-<sup>18</sup>F**.

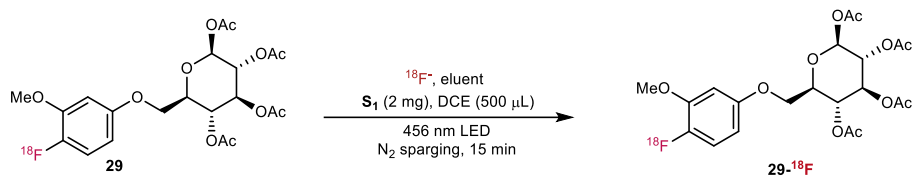

| Substrate | Product                  | Elution efficiency (EE)            | HPLC analysis conditions | RCC |
|-----------|--------------------------|------------------------------------|--------------------------|-----|
| <b>29</b> | <b>29-<sup>18</sup>F</b> | 14.89 mCi/(14.89 + 0.57) mCi = 96% | 55% MeCN                 | 59% |

**Supplementary Table 36.** Elution efficiency and RCC calculation of **29-<sup>18</sup>F**.

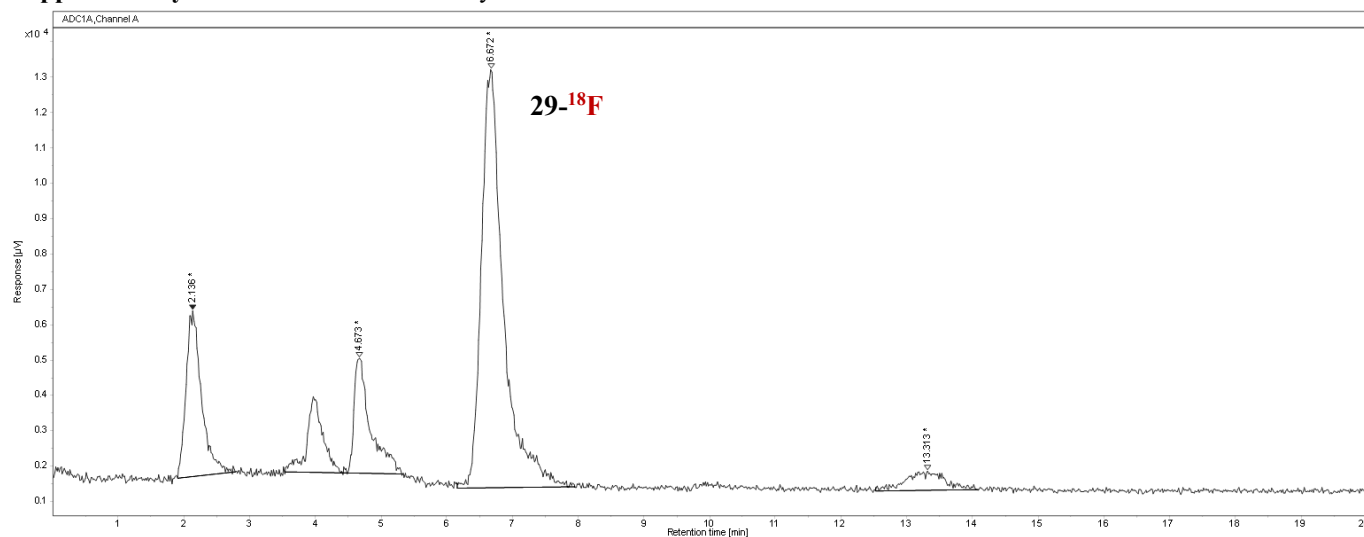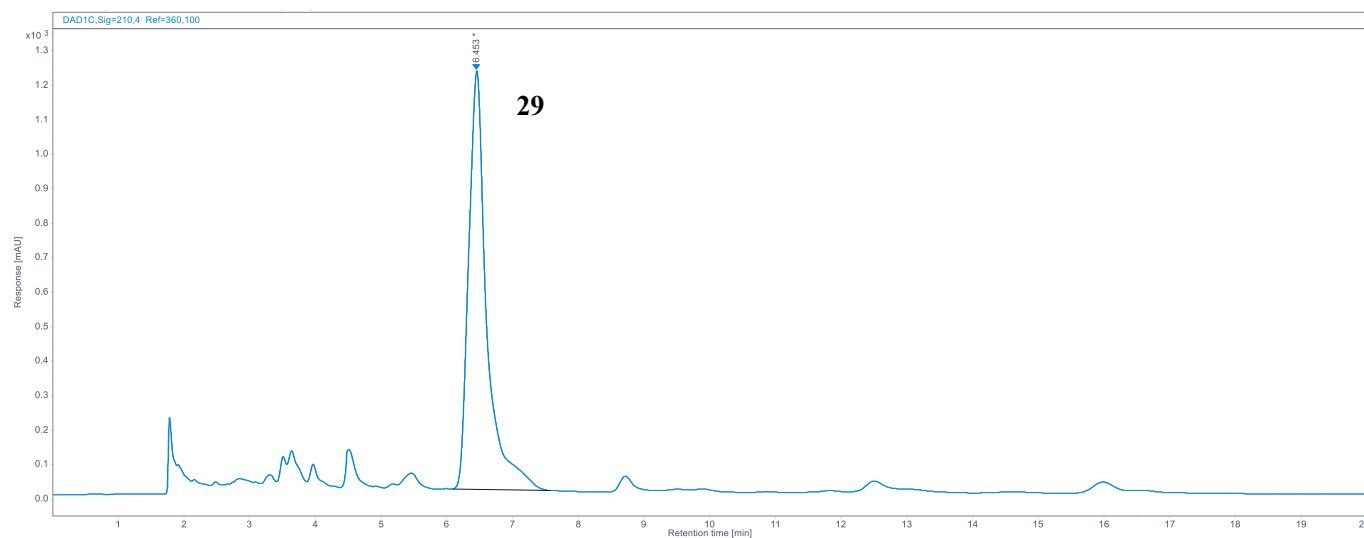

| # | RT (min) | Area (µV·s) | Area%         | Height    | Height% | Start time (min) | End time (min) |
|---|----------|-------------|---------------|-----------|---------|------------------|----------------|
| 1 | 2.136    | 76767.715   | 16.364        | 4694.308  | 23.10   | 1.902            | 2.785          |
| 2 | 4.673    | 93745.296   | 19.982        | 3252.394  | 16.00   | 3.540            | 5.329          |
| 3 | 6.672    | 276663.439  | <b>58.973</b> | 11829.061 | 58.21   | 6.158            | 7.946          |
| 4 | 13.313   | 21962.396   | 4.681         | 546.394   | 2.69    | 12.533           | 14.097         |

**Supplementary Figure 34.** Radio-HPLC analysis of **29-<sup>18</sup>F**.

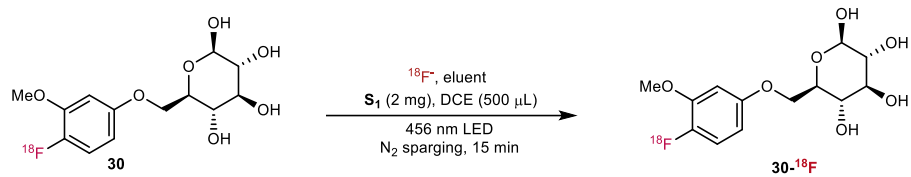

| Substrate | Product                  | Elution efficiency (EE)        | HPLC analysis conditions | RCC |
|-----------|--------------------------|--------------------------------|--------------------------|-----|
| <b>30</b> | <b>30-<sup>18</sup>F</b> | 3.1 mCi/(3.1 + 0.09) mCi = 97% | 20% MeCN                 | 30% |

**Supplementary Table 37.** Elution efficiency and RCC calculation of **30-<sup>18</sup>F**.

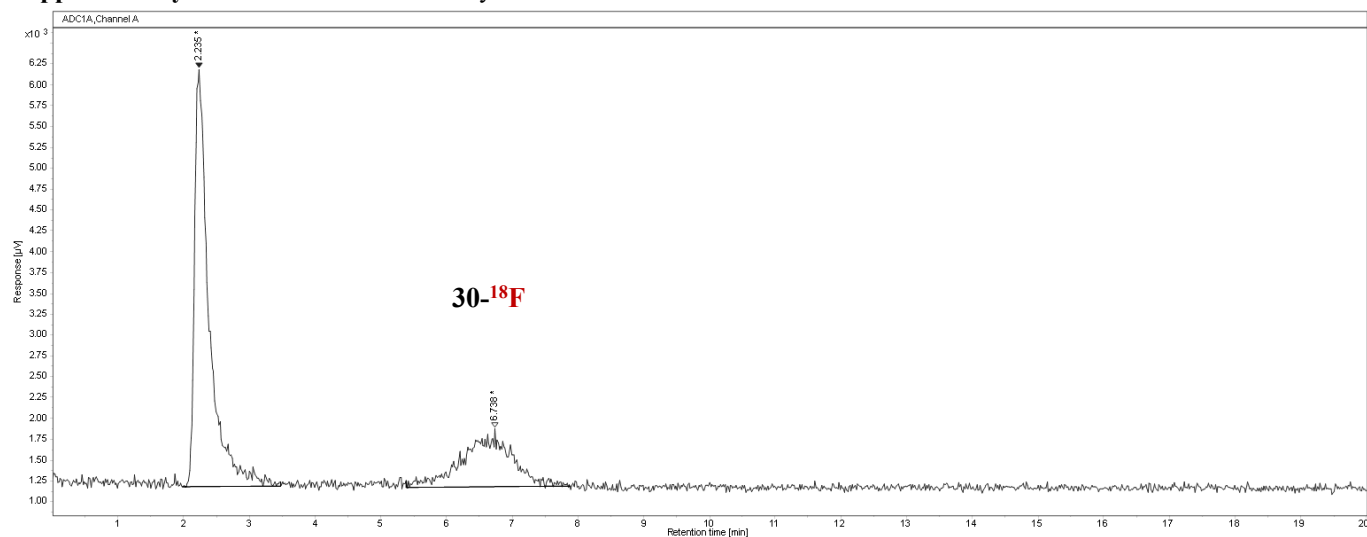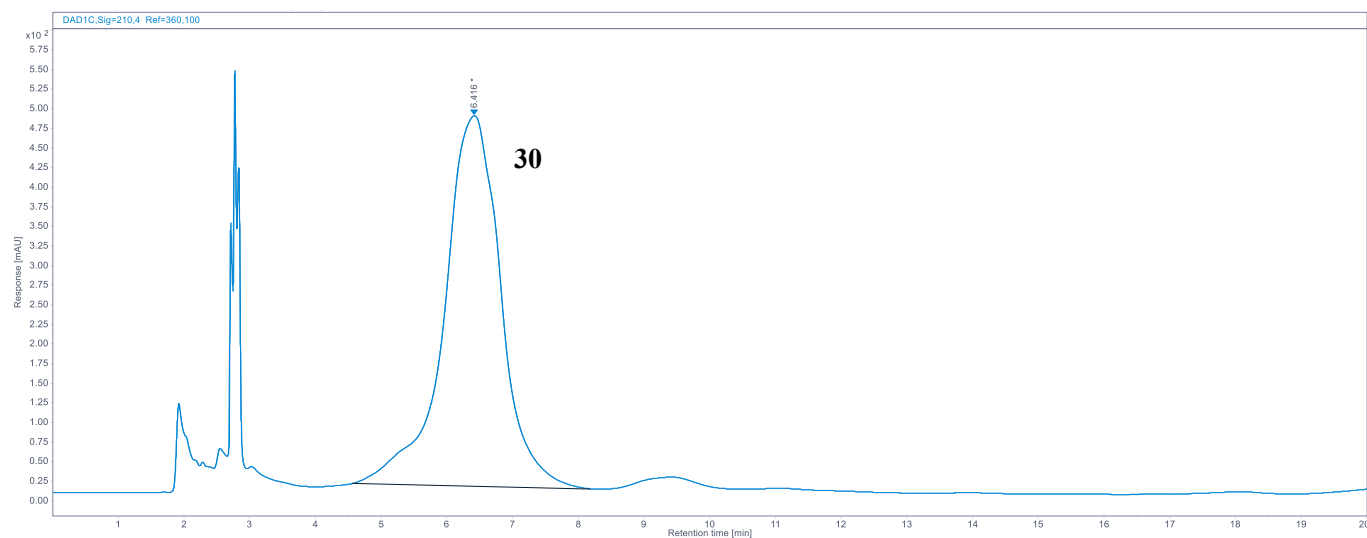

| # | RT (min) | Area (μV·s) | Area%         | Height   | Height% | Start time (min) | End time (min) |
|---|----------|-------------|---------------|----------|---------|------------------|----------------|
| 1 | 2.235    | 78096.010   | 69.981        | 5014.881 | 87.87   | 1.982            | 3.471          |
| 2 | 6.738    | 33499.844   | <b>30.019</b> | 692.027  | 12.13   | 5.385            | 7.877          |

**Supplementary Figure 35.** Radio-HPLC analysis of **30-<sup>18</sup>F**.

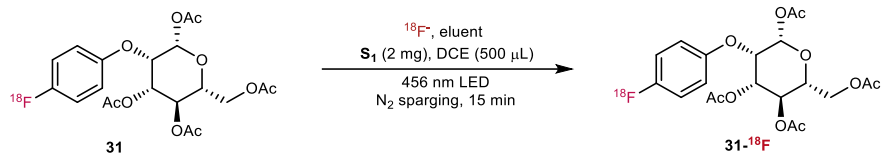

| Substrate | Product                  | Elution efficiency (EE)       | HPLC analysis conditions | RCC |
|-----------|--------------------------|-------------------------------|--------------------------|-----|
| <b>31</b> | <b>31-<sup>18</sup>F</b> | 5.7 mCi/(5.7 + 0.8) mCi = 88% | 55% MeCN                 | 16% |

**Supplementary Table 38.** Elution efficiency and RCC calculation of **31-<sup>18</sup>F**.

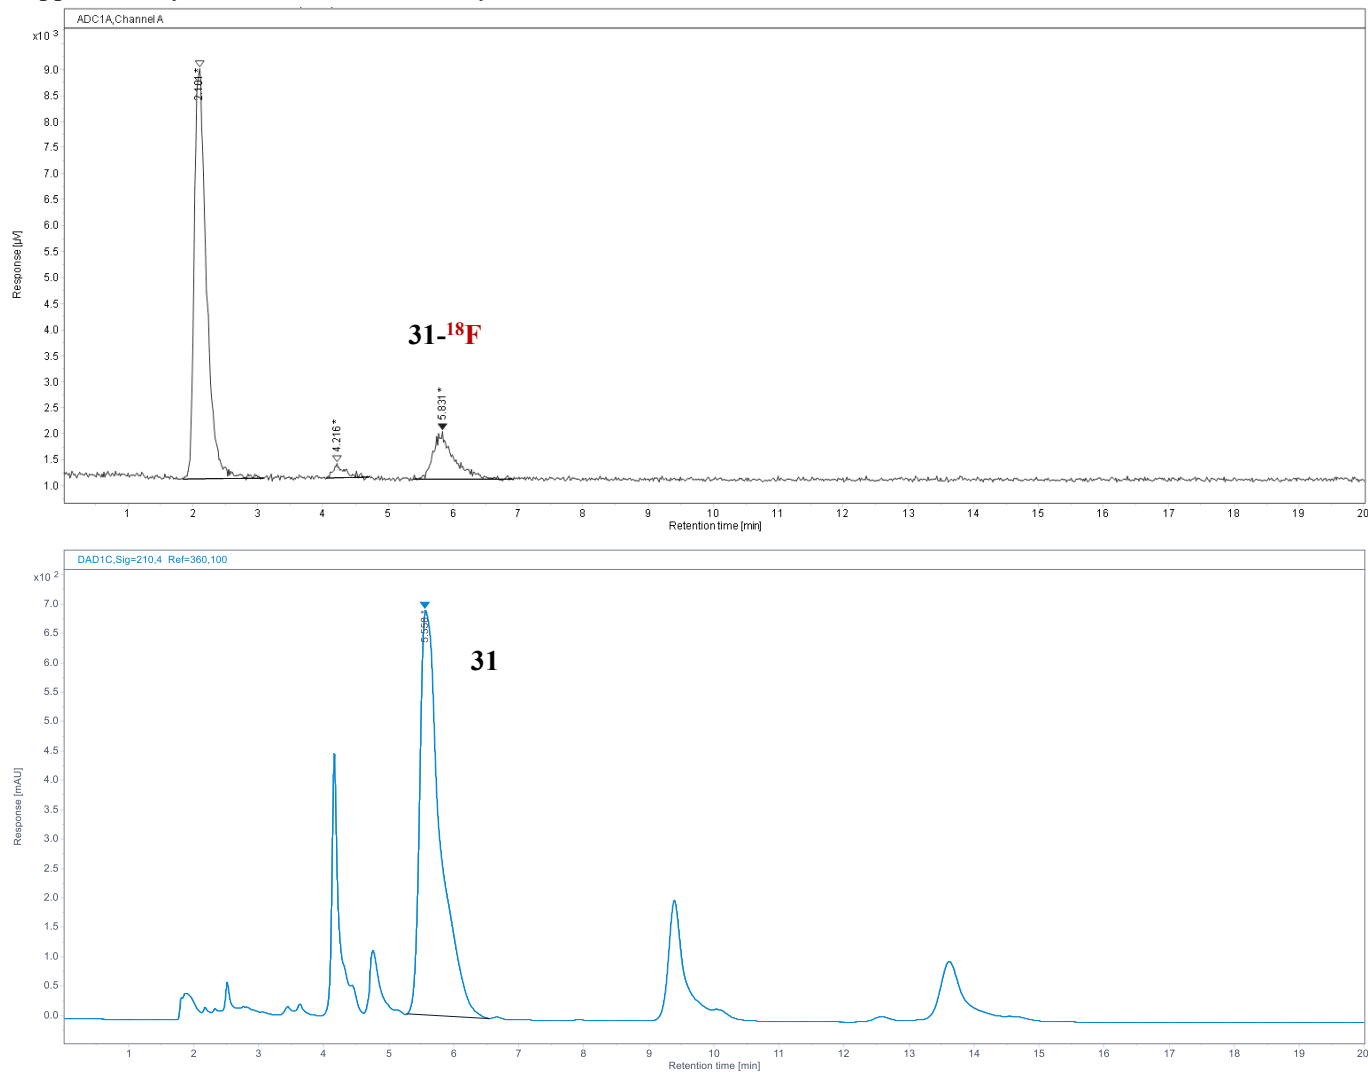

| # | RT (min) | Area (µV·s) | Area%         | Height   | Height% | Start time (min) | End time (min) |
|---|----------|-------------|---------------|----------|---------|------------------|----------------|
| 1 | 2.101    | 102954.392  | 81.610        | 7872.019 | 86.86   | 1.855            | 3.086          |
| 2 | 4.216    | 3273.419    | 2.595         | 284.953  | 3.14    | 4.049            | 4.709          |
| 3 | 5.831    | 19926.457   | <b>15.795</b> | 906.414  | 10.00   | 5.386            | 6.920          |

**Supplementary Figure 36.** Radio-HPLC analysis of **31-<sup>18</sup>F**.

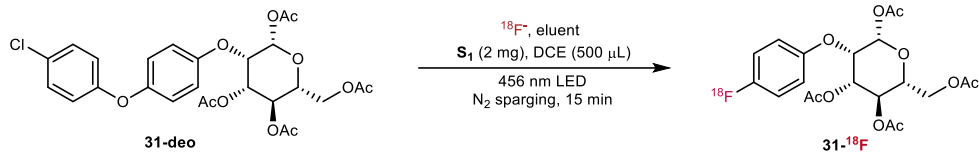

| Substrate     | Product                  | Elution efficiency (EE)          | HPLC analysis conditions | RCC |
|---------------|--------------------------|----------------------------------|--------------------------|-----|
| <b>31-deo</b> | <b>31-<sup>18</sup>F</b> | 16.9 mCi/ (16.9 + 1.8) mCi = 90% | 50% MeCN                 | 77% |

**Supplementary Table 39.** Elution efficiency and RCC calculation of **31-<sup>18</sup>F** from **31-deo**.

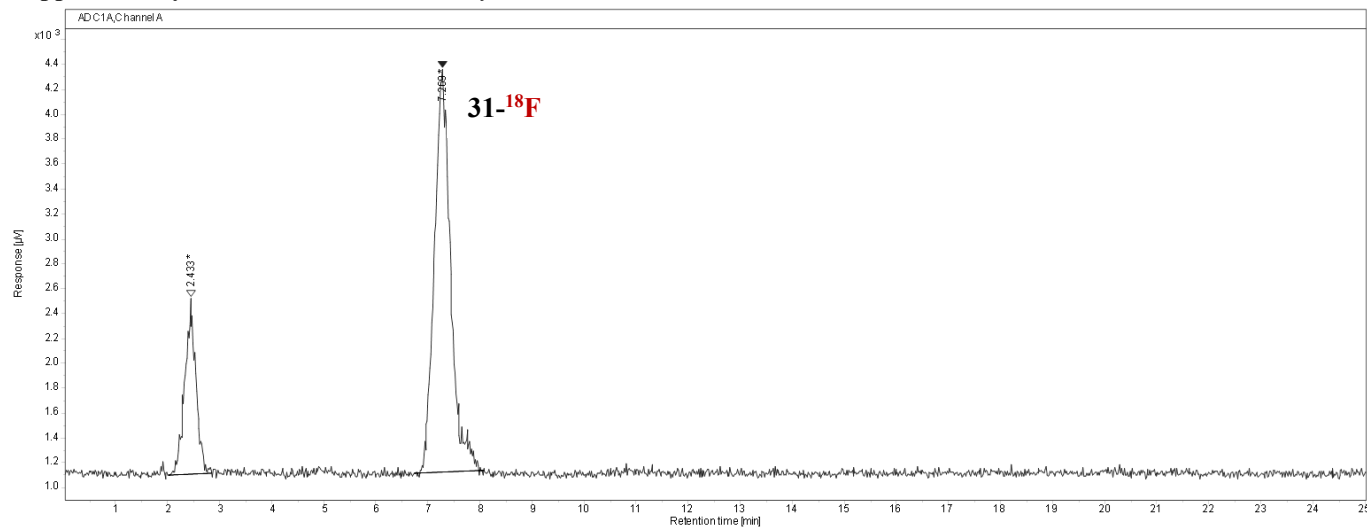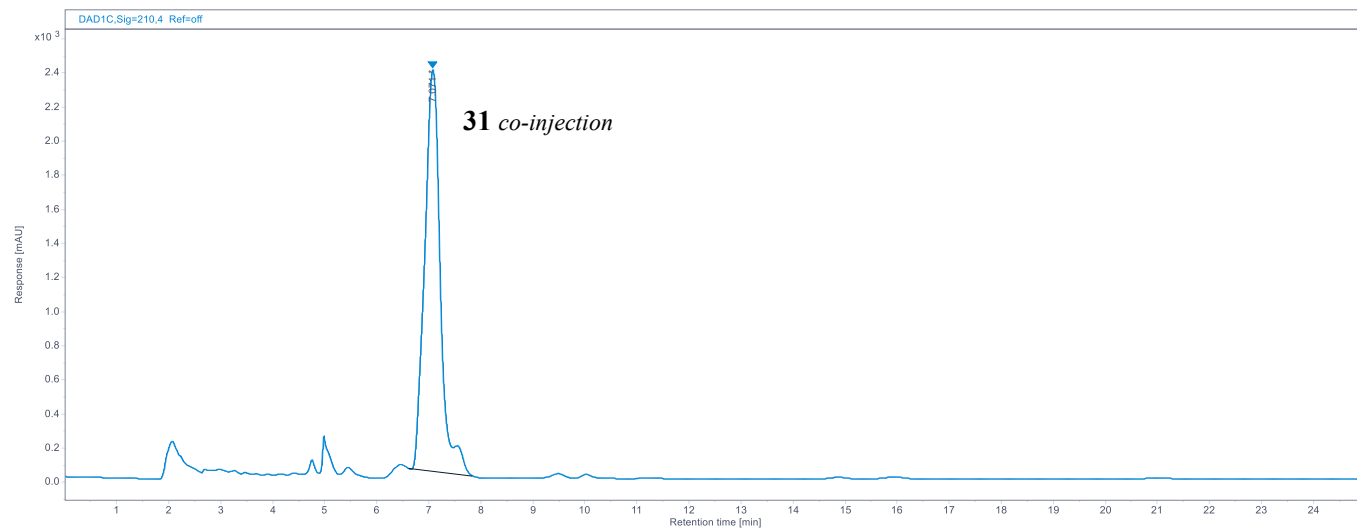

| # | RT (min) | Area (µV·s) | Area%         | Height (µV) | Height% | Start time (min) | End time (min) |
|---|----------|-------------|---------------|-------------|---------|------------------|----------------|
| 1 | 2.433    | 20759.180   | 22.807        | 1413.636    | 30.39   | 2.022            | 2.840          |
| 2 | 7.269    | 70263.120   | <b>77.193</b> | 3238.768    | 69.61   | 6.740            | 8.077          |

**Supplementary Figure 37.** Radio-HPLC analysis of **31-<sup>18</sup>F**.

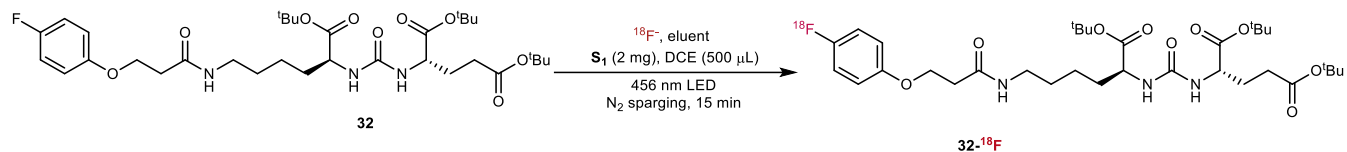

| Substrate | Product                  | Elution efficiency (EE)           | HPLC analysis conditions | RCC |
|-----------|--------------------------|-----------------------------------|--------------------------|-----|
| <b>32</b> | <b>32-<sup>18</sup>F</b> | 4.76 mCi/ (4.76 + 0.04) mCi = 99% | 70% MeCN                 | 33% |

**Supplementary Table 40.** Elution efficiency and RCC calculation of **32-<sup>18</sup>F**.

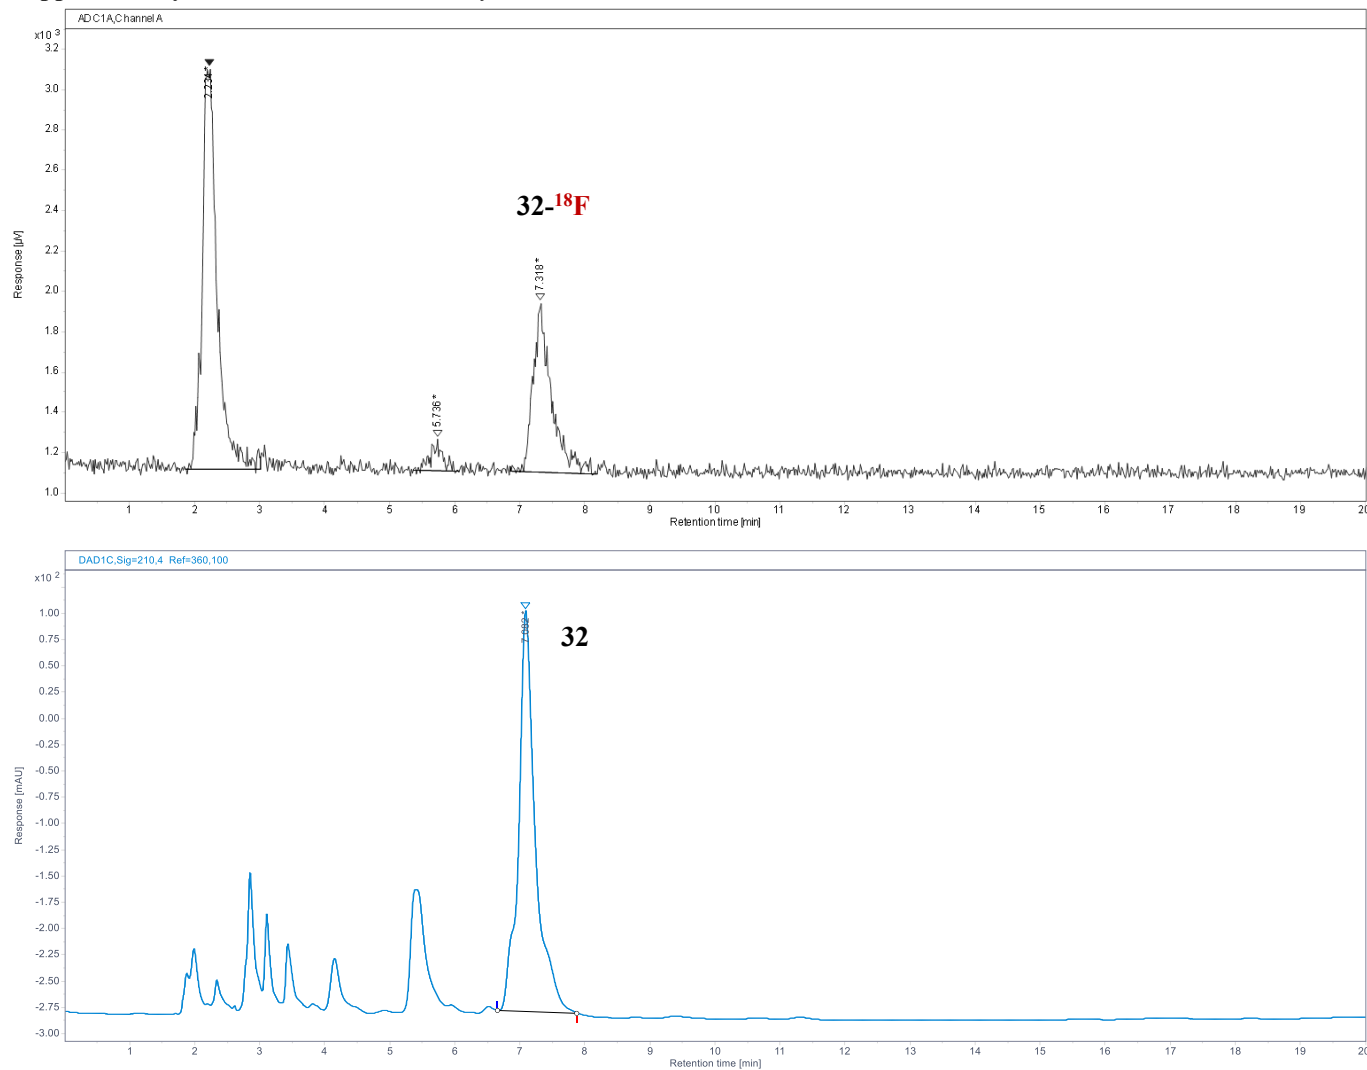

| # | RT (min) | Area (μV·s) | Area%         | Height   | Height% | Start time (min) | End time (min) |
|---|----------|-------------|---------------|----------|---------|------------------|----------------|
| 1 | 2.234    | 32025.617   | 63.742        | 1994.086 | 6.48    | 1.859            | 3.015          |
| 2 | 5.736    | 1860.540    | 3.703         | 159.983  | 5.33    | 5.370            | 6.070          |
| 3 | 7.318    | 16356.180   | <b>32.555</b> | 845.402  | 28.19   | 6.855            | 8.170          |

**Supplementary Figure 38.** Radio-HPLC analysis of **32-<sup>18</sup>F**.

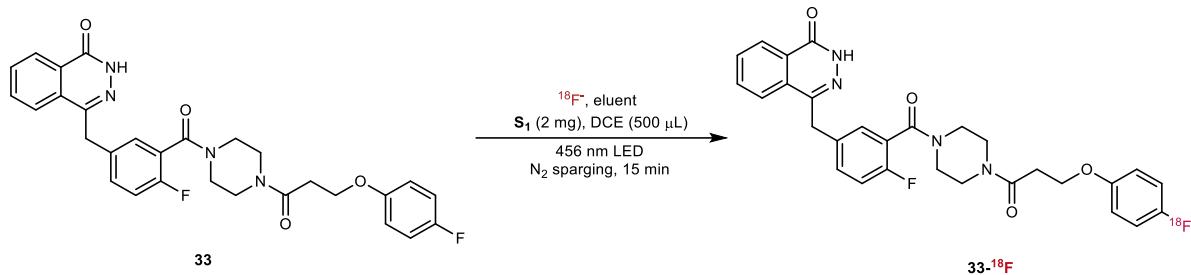

| Substrate | Product                  | Elution efficiency (EE)            | HPLC analysis conditions | RCC |
|-----------|--------------------------|------------------------------------|--------------------------|-----|
| <b>33</b> | <b>33-<sup>18</sup>F</b> | 16.01 mCi/(16.01 + 0.57) mCi = 97% | 50% MeCN                 | 52% |

**Supplementary Table 41.** Elution efficiency and RCC calculation of **33-<sup>18</sup>F**.

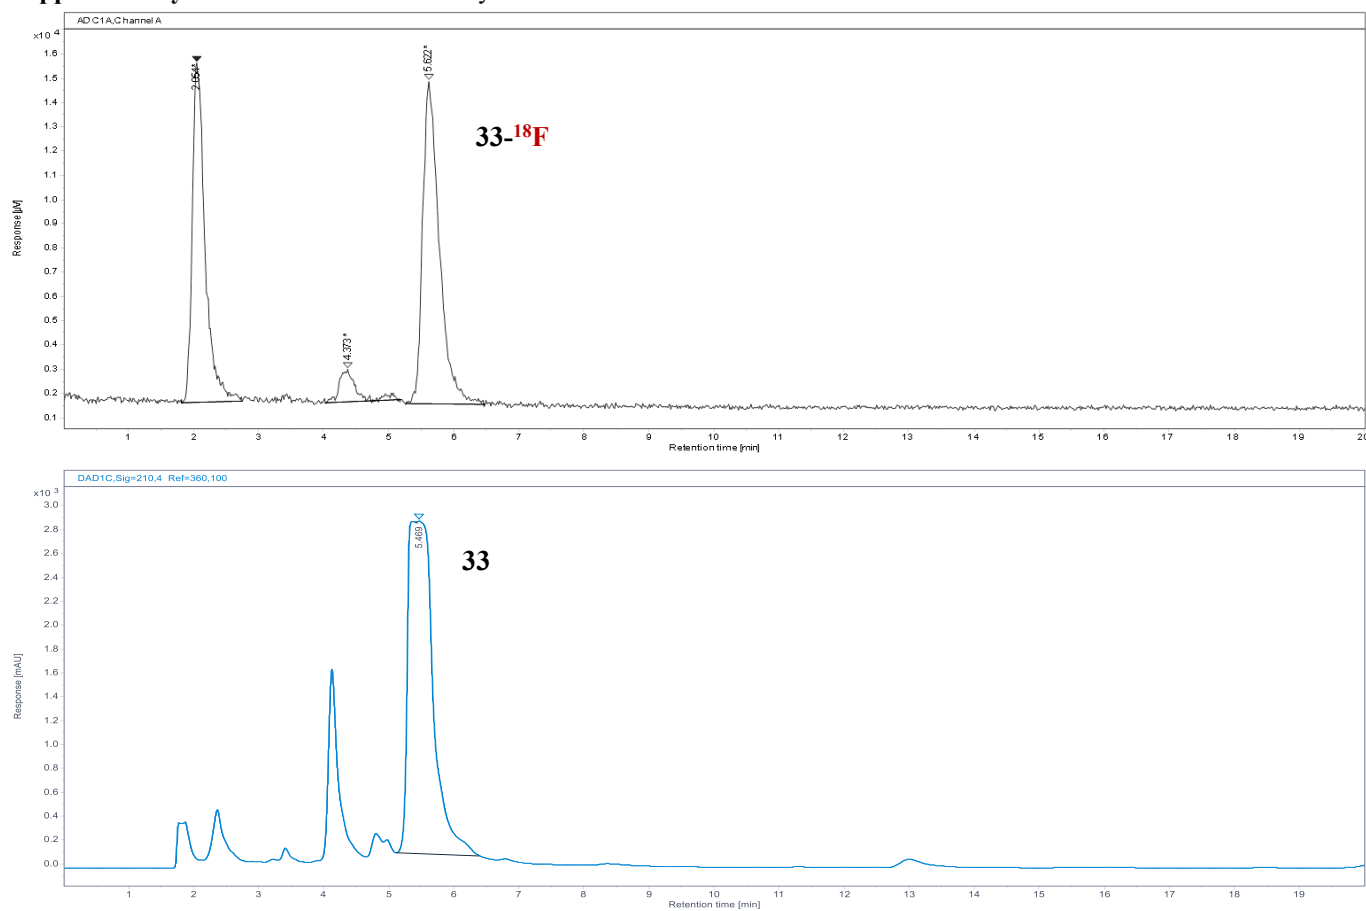

| # | RT (min) | Area (µV·s) | Area%         | Height    | Height% | Start time (min) | End time (min) |
|---|----------|-------------|---------------|-----------|---------|------------------|----------------|
| 1 | 2.054    | 192831.022  | 42.688        | 14000.744 | 48.91   | 1.811            | 2.756          |
| 2 | 4.373    | 24105.993   | 5.336         | 1334.936  | 4.66    | 4.032            | 5.204          |
| 3 | 5.622    | 234786.161  | <b>51.976</b> | 13289.138 | 46.43   | 5.264            | 6.480          |

**Supplementary Figure 39.** Radio-HPLC analysis of **33-<sup>18</sup>F**.



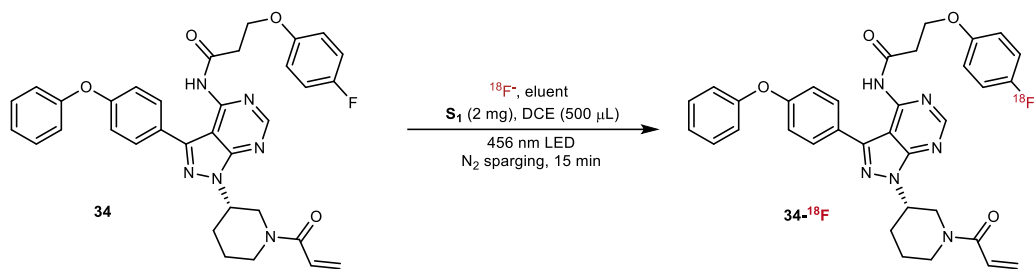

| Substrate | Product                  | Elution efficiency (EE)            | HPLC analysis conditions | RCC |
|-----------|--------------------------|------------------------------------|--------------------------|-----|
| <b>34</b> | <b>34-<sup>18</sup>F</b> | 12.8 mCi / (12.8 + 0.73) mCi = 95% | 70% MeCN                 | 37% |

**Supplementary Table 42.** Elution efficiency and RCC calculation of **34-<sup>18</sup>F**.

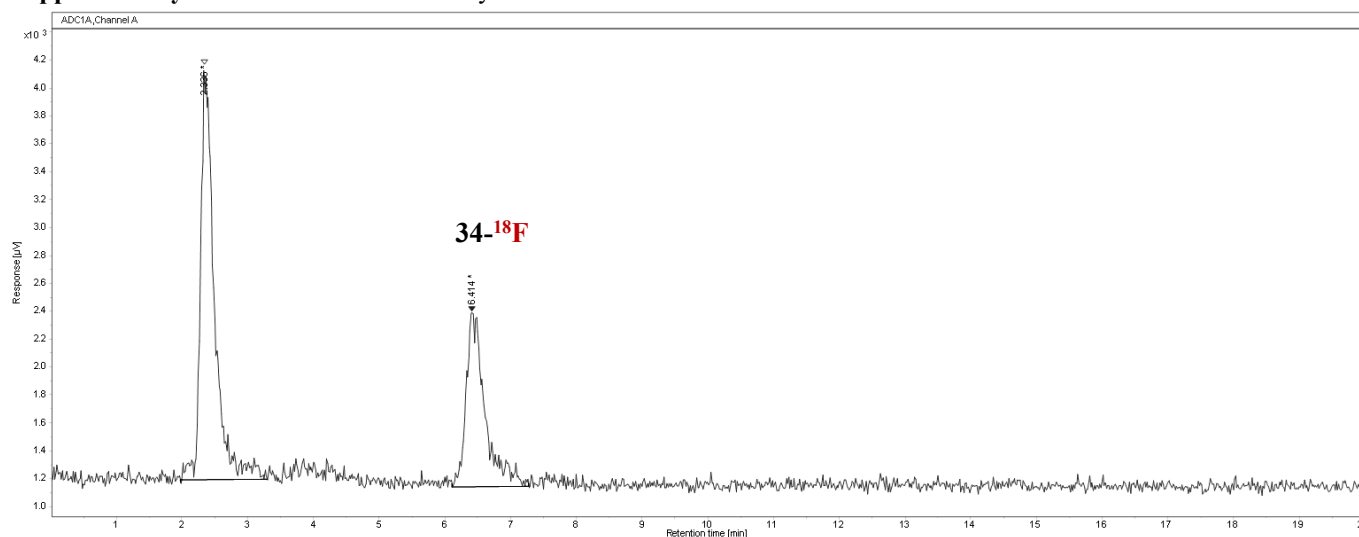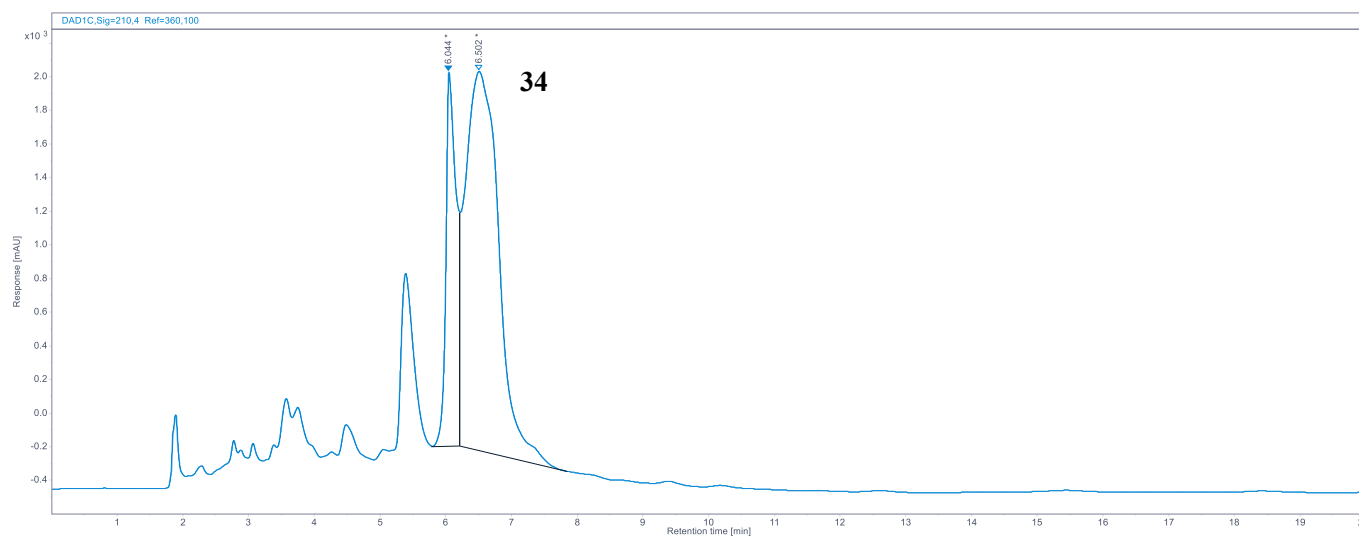

| # | RT (min) | Area (µV·s) | Area%         | Height   | Height% | Start time (min) | End time (min) |
|---|----------|-------------|---------------|----------|---------|------------------|----------------|
| 1 | 2.336    | 43755.415   | 63.488        | 2965.759 | 70.37   | 1.978            | 3.301          |
| 2 | 6.414    | 25163.537   | <b>36.512</b> | 1248.516 | 29.63   | 6.107            | 7.271          |

**Supplementary Figure 40.** Radio-HPLC analysis of **34-<sup>18</sup>F**.

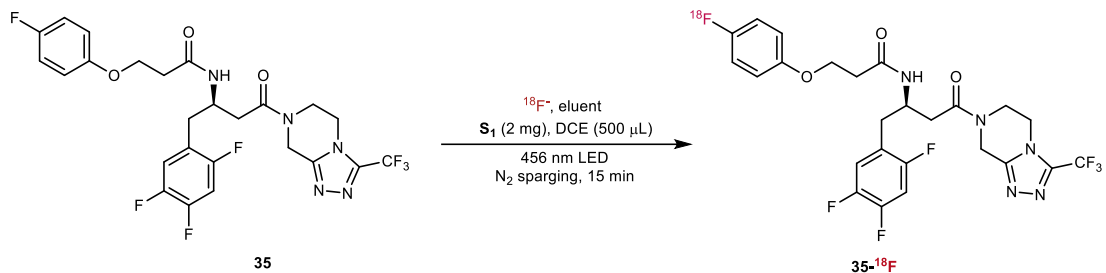

| Substrate | Product                  | Elution efficiency (EE)        | HPLC analysis conditions | RCC |
|-----------|--------------------------|--------------------------------|--------------------------|-----|
| <b>35</b> | <b>35-<sup>18</sup>F</b> | 10.1 mCi/(10.1+0.61) mCi = 94% | 60% MeCN                 | 49% |

**Supplementary Table 43.** Elution efficiency and RCC calculation of **35-<sup>18</sup>F**.

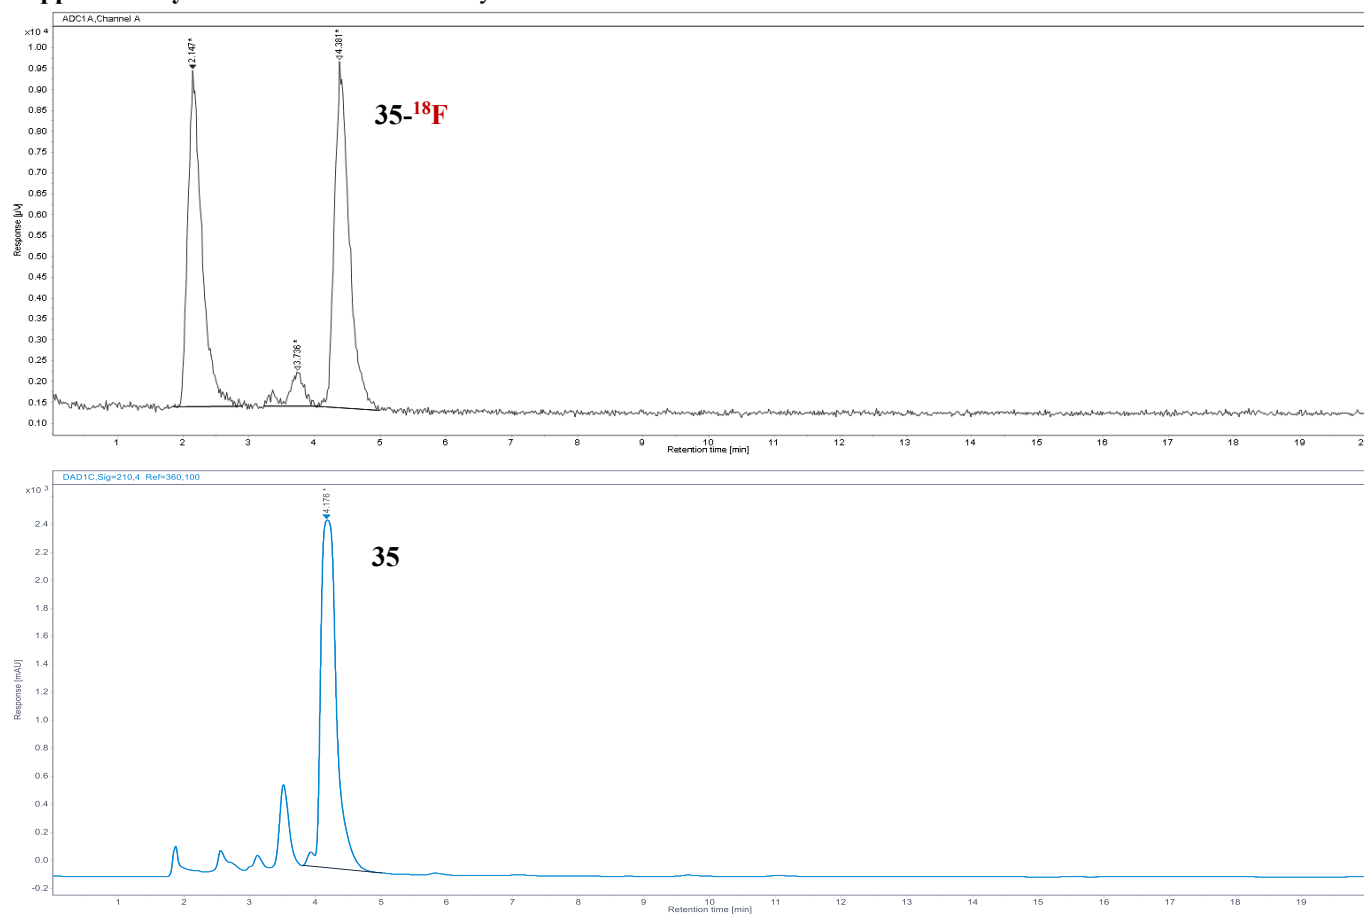

| # | RT (min) | Area (μV·s) | Area%         | Height   | Height% | Start time (min) | End time (min) |
|---|----------|-------------|---------------|----------|---------|------------------|----------------|
| 1 | 2.147    | 119558.478  | 45.544        | 8063.640 | 46.84   | 1.849            | 2.887          |
| 2 | 3.736    | 14201.080   | 5.410         | 834.112  | 4.85    | 3.224            | 4.016          |
| 3 | 4.381    | 128749.656  | <b>49.046</b> | 8316.193 | 48.31   | 4.016            | 4.982          |

**Supplementary Figure 41.** Radio-HPLC analysis of **35-<sup>18</sup>F**.

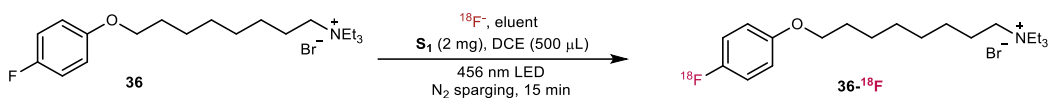

| Substrate | Product             | Elution efficiency (EE)          | HPLC analysis conditions | RCC   |
|-----------|---------------------|----------------------------------|--------------------------|-------|
| 36        | $^{18}\text{F}$ -36 | 8.57 mCi/(8.57 + 0.46) mCi = 95% | 65% MeCN                 | Trace |

**Supplementary Table 44.** Elution efficiency and RCC calculation of  $^{18}\text{F}$ -36.

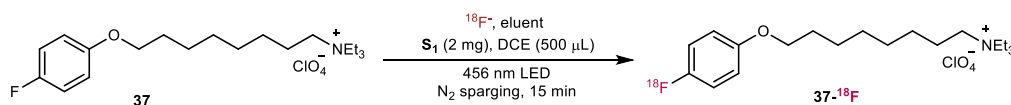

| Substrate | Product             | Elution efficiency (EE)            | HPLC analysis conditions | RCC |
|-----------|---------------------|------------------------------------|--------------------------|-----|
| 37        | $^{18}\text{F}$ -37 | 12.23 mCi/(12.23 + 0.81) mCi = 94% | 65% MeCN                 | 36% |

**Supplementary Table 45.** Elution efficiency and RCC calculation of  $^{18}\text{F}$ -37.

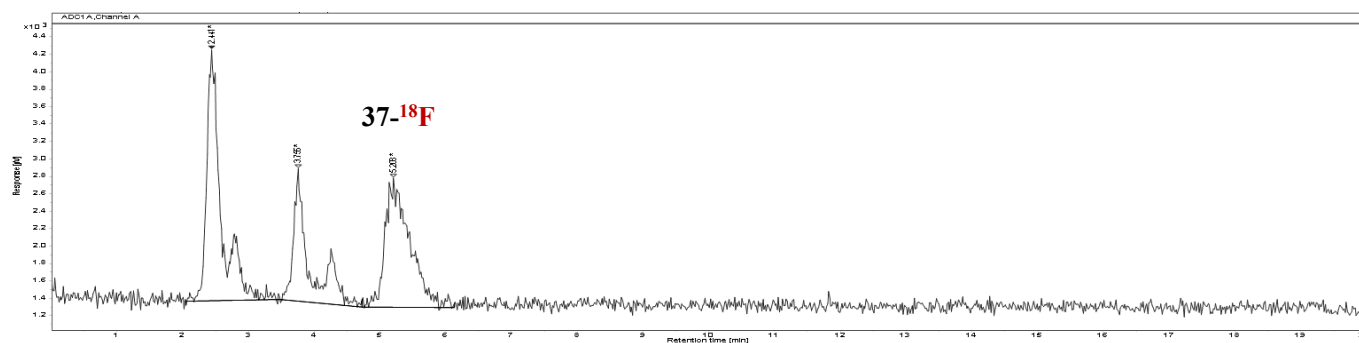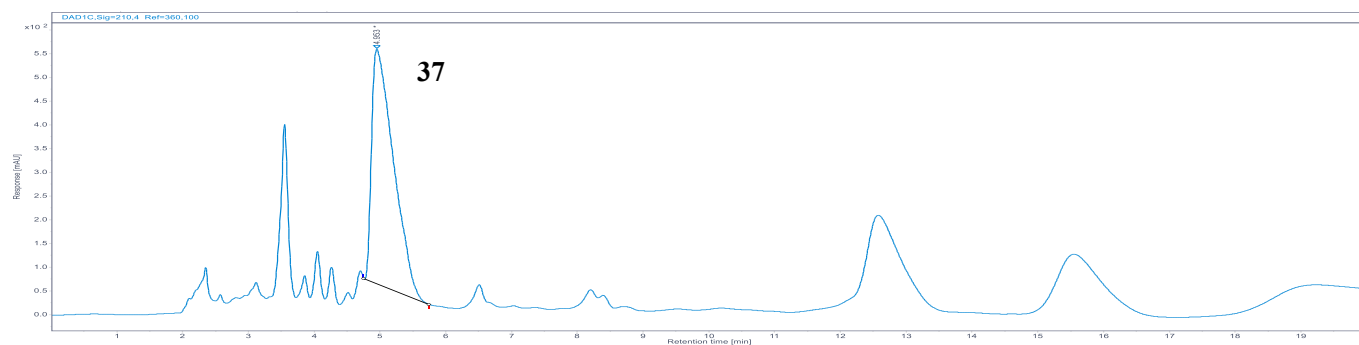

| # | RT (min) | Area ( $\mu\text{V}\cdot\text{s}$ ) | Area%         | Height   | Height% | Start time (min) | End time (min) |
|---|----------|-------------------------------------|---------------|----------|---------|------------------|----------------|
| 1 | 2.441    | 44096.707                           | 41.014        | 2886.001 | 48.93   | 2.045            | 3.480          |
| 2 | 3.755    | 24884.132                           | 23.145        | 1525.153 | 25.86   | 3.480            | 4.731          |
| 3 | 5.208    | 38534.568                           | <b>35.841</b> | 1487.368 | 25.22   | 4.731            | 6.133          |

**Supplementary Figure 42.** Radio-HPLC analysis of  $^{18}\text{F}$ -37.

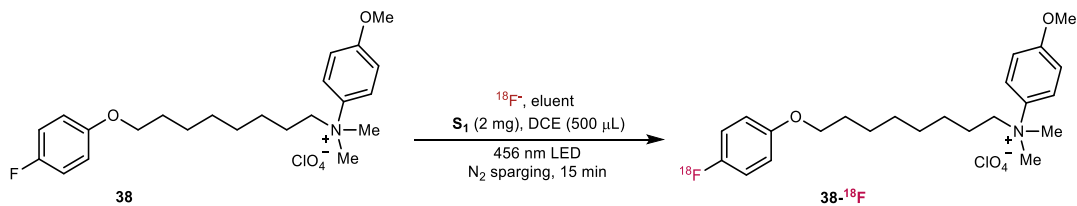

| Substrate | Product                  | Elution efficiency (EE)         | HPLC analysis conditions | RCC |
|-----------|--------------------------|---------------------------------|--------------------------|-----|
| <b>38</b> | <b>38-<sup>18</sup>F</b> | 9.48 mCi/(9.48 + 0.2) mCi = 98% | 60% MeCN (column B)      | 62% |

**Supplementary Table 46.** Elution efficiency and RCC calculation of **37-<sup>18</sup>F**.

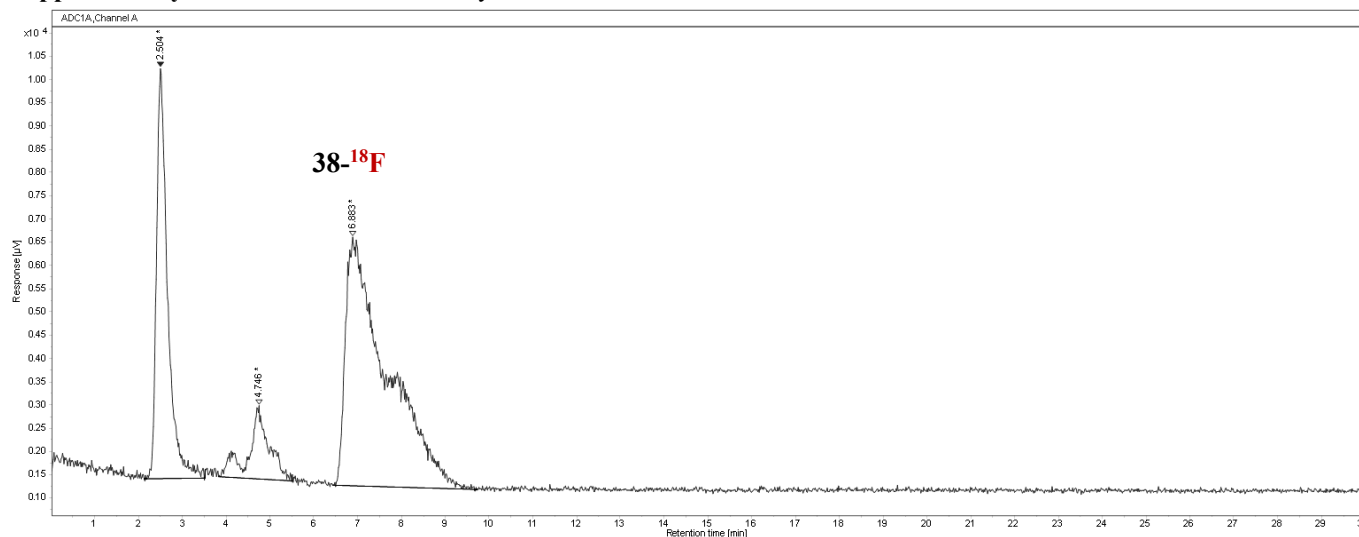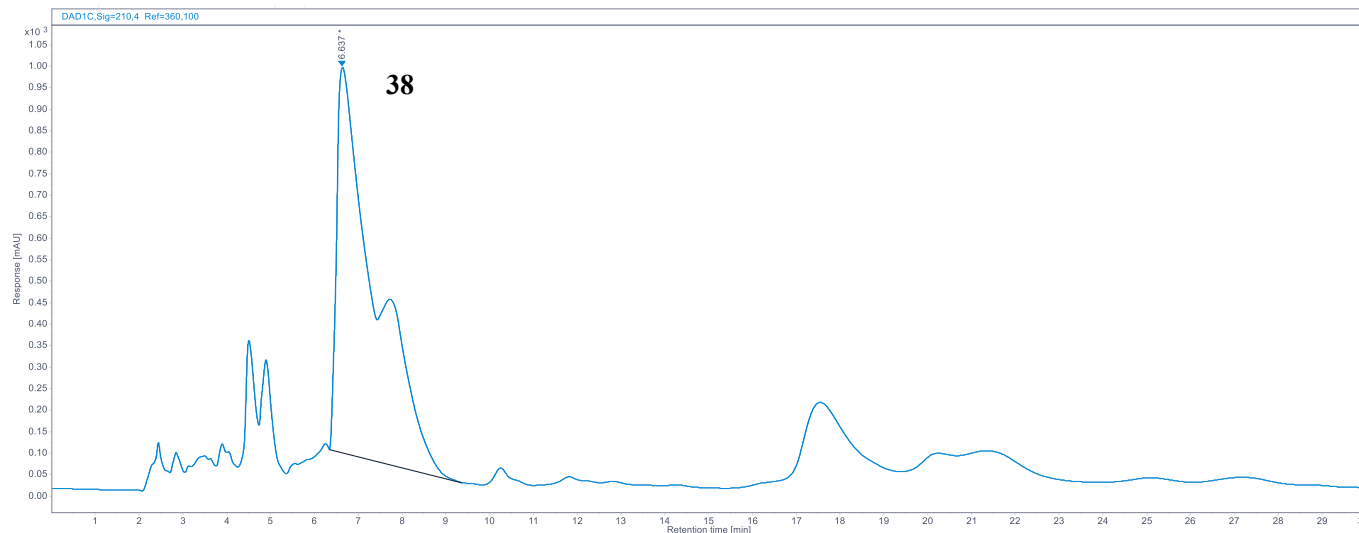

| # | RT (min) | Area (μV·s) | Area%         | Height   | Height% | Start time (min) | End time (min) |
|---|----------|-------------|---------------|----------|---------|------------------|----------------|
| 1 | 2.504    | 158693.334  | 28.555        | 8835.954 | 56.04   | 2.136            | 3.528          |
| 2 | 4.746    | 50597.145   | 9.104         | 1585.133 | 10.05   | 3.835            | 5.537          |
| 3 | 6.883    | 346461.274  | <b>62.341</b> | 5344.961 | 33.90   | 6.440            | 9.741          |

**Supplementary Figure 43.** Radio-HPLC analysis of **38-<sup>18</sup>F**.

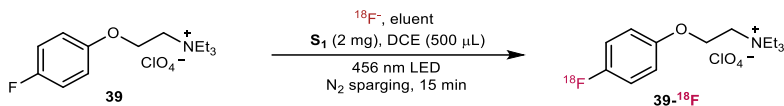

| Substrate | Product                  | Elution efficiency (EE)      | HPLC analysis conditions | RCC  |
|-----------|--------------------------|------------------------------|--------------------------|------|
| <b>39</b> | <b>39-<sup>18</sup>F</b> | 6.5 mCi/(6.5+0.27) mCi = 96% | 40% MeCN                 | N.D. |

**Supplementary Table 47.** Elution efficiency and RCC calculation of **39-<sup>18</sup>F**.

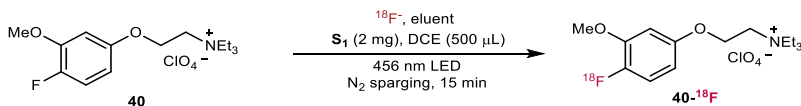

| Substrate | Product                  | Elution efficiency (EE)          | HPLC analysis conditions | RCC |
|-----------|--------------------------|----------------------------------|--------------------------|-----|
| <b>40</b> | <b>40-<sup>18</sup>F</b> | 13.92 mCi/(13.92+0.78) mCi = 95% | 40% MeCN (column B)      | 49% |

**Supplementary Table 48.** Elution efficiency and RCC calculation of **40-<sup>18</sup>F**.

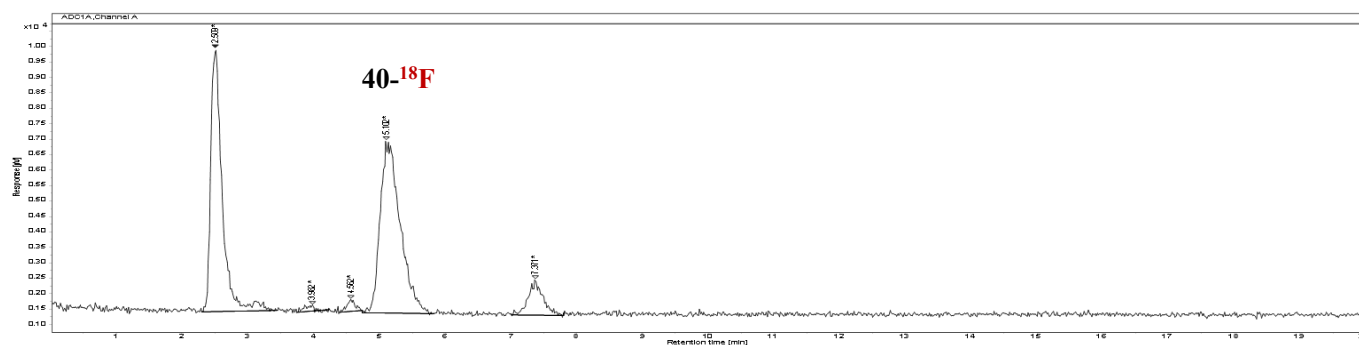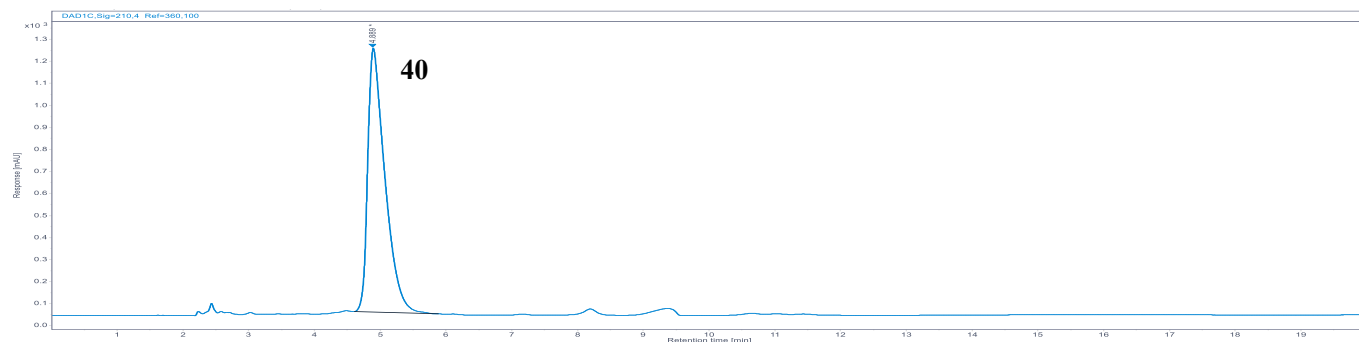

| # | RT (min) | Area (μV·s) | Area%         | Height   | Height% | Start time (min) | End time (min) |
|---|----------|-------------|---------------|----------|---------|------------------|----------------|
| 1 | 2.509    | 102203.473  | 42.187        | 8516.150 | 53.71   | 2.298            | 3.444          |
| 2 | 3.982    | 1803.592    | 0.744         | 199.569  | 1.26    | 3.752            | 4.243          |
| 3 | 4.562    | 3471.311    | 1.433         | 400.312  | 2.52    | 4.395            | 4.742          |
| 4 | 5.102    | 117480.864  | <b>48.494</b> | 5586.241 | 35.23   | 4.742            | 5.833          |
| 5 | 7.371    | 17301.347   | 7.142         | 1153.355 | 7.27    | 7.008            | 7.803          |

**Supplementary Figure 44.** Radio-HPLC analysis of **40-<sup>18</sup>F**.

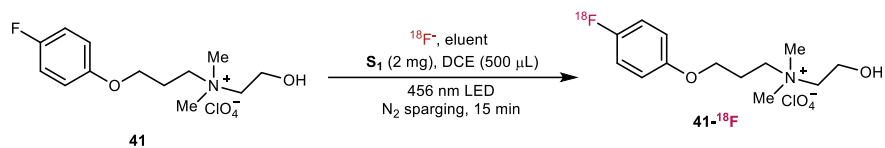

| Substrate | Product                  | Elution efficiency (EE)         | HPLC analysis conditions | RCC |
|-----------|--------------------------|---------------------------------|--------------------------|-----|
| <b>41</b> | <b>41-<sup>18</sup>F</b> | 12.5 mCi/(12.5 + 0.7) mCi = 95% | 35% MeCN (column B)      | 20% |

**Supplementary Table 49.** Elution efficiency and RCC calculation of **41-<sup>18</sup>F**.

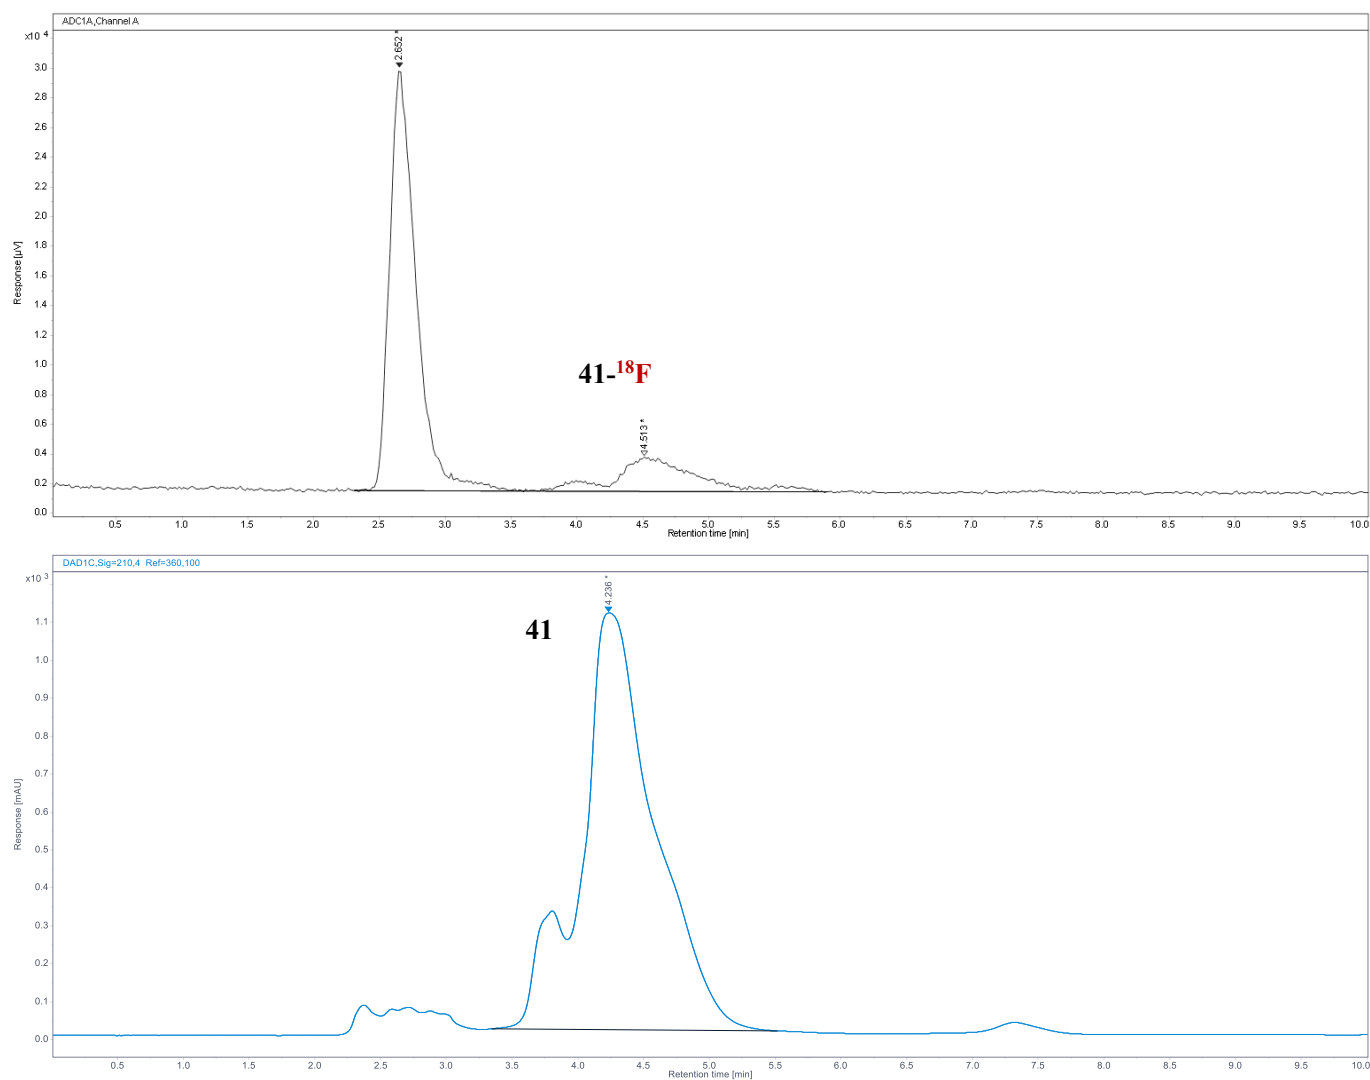

| # | RT (min) | Area ( $\mu\text{V}\cdot\text{s}$ ) | Area%         | Height    | Height% | Start time (min) | End time (min) |
|---|----------|-------------------------------------|---------------|-----------|---------|------------------|----------------|
| 1 | 2.652    | 395420.034                          | 80.332        | 28452.075 | 92.47   | 2.310            | 3.583          |
| 2 | 4.513    | 96811.367                           | <b>19.668</b> | 2316.562  | 7.53    | 3.583            | 5.902          |

**Supplementary Figure 45.** Radio-HPLC analysis of **41-<sup>18</sup>F**.

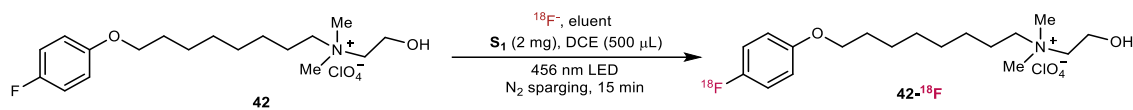

| Substrate | Product             | Elution efficiency (EE)        | HPLC analysis conditions | RCC |
|-----------|---------------------|--------------------------------|--------------------------|-----|
| 42        | 42- <sup>18</sup> F | 8.41 mCi/(8.41+0.74) mCi = 92% | 60% MeCN                 | 72% |

**Supplementary Table 50.** Elution efficiency and RCC calculation of 42-<sup>18</sup>F.

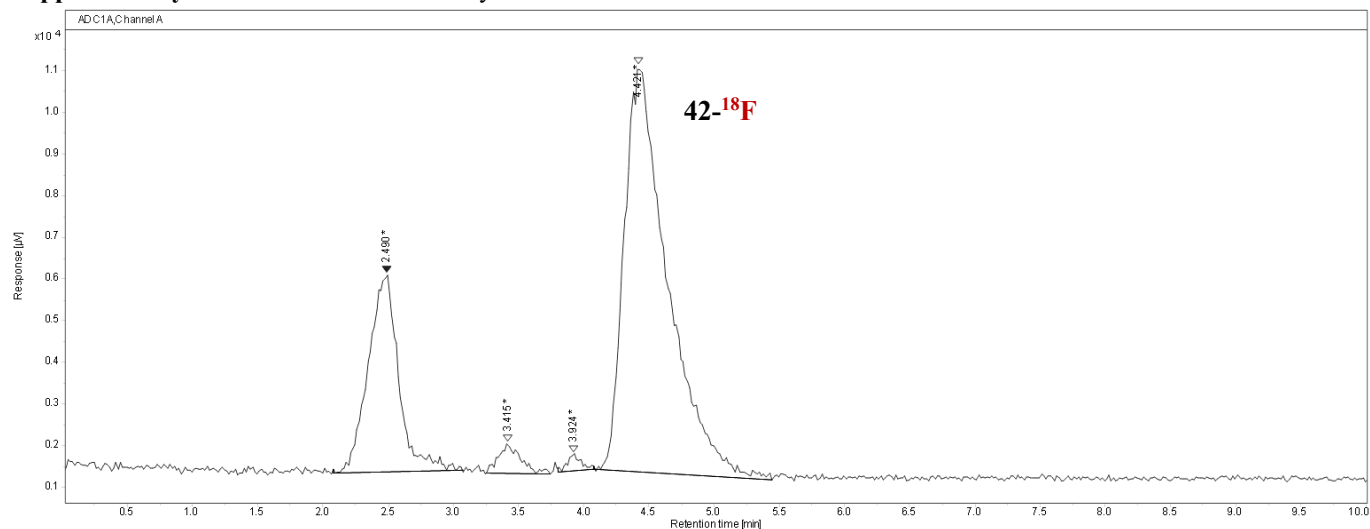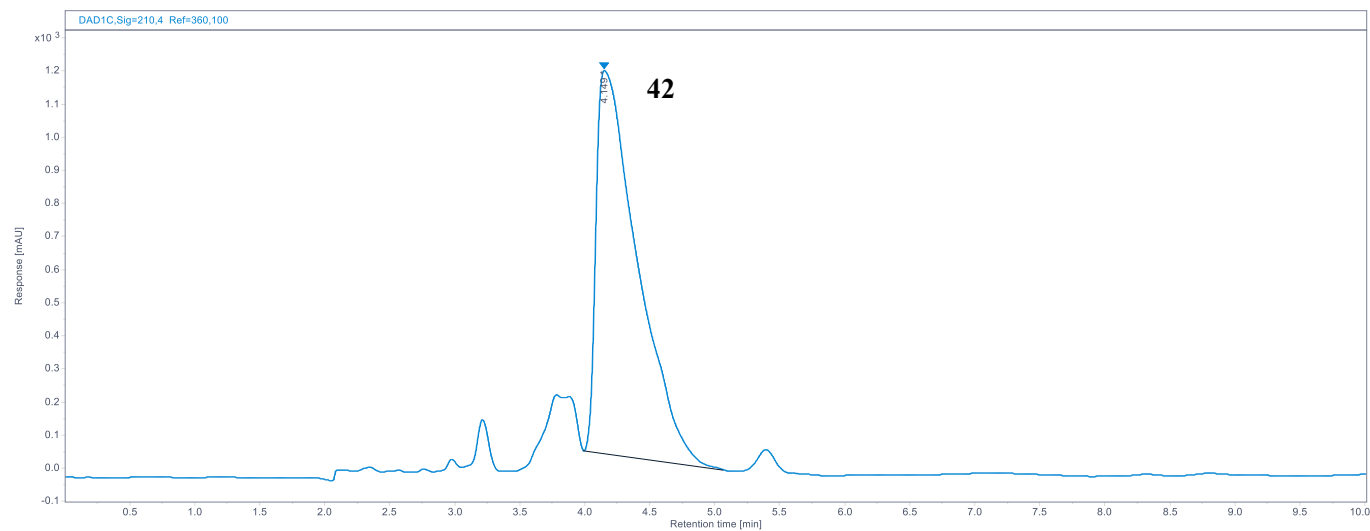

| # | RT (min) | Area (µV·s) | Area%         | Height   | Height% | Start time (min) | End time (min) |
|---|----------|-------------|---------------|----------|---------|------------------|----------------|
| 1 | 2.490    | 76910.277   | 24.695        | 4744.585 | 30.39   | 2.078            | 3.073          |
| 2 | 3.415    | 8260.146    | 2.652         | 711.557  | 4.56    | 3.251            | 3.743          |
| 3 | 3.924    | 2910.418    | 0.935         | 416.356  | 2.67    | 3.801            | 4.079          |
| 4 | 4.421    | 223356.774  | <b>71.718</b> | 9739.408 | 62.38   | 4.079            | 5.445          |

**Supplementary Figure 46.** Radio-HPLC analysis of 42-<sup>18</sup>F.

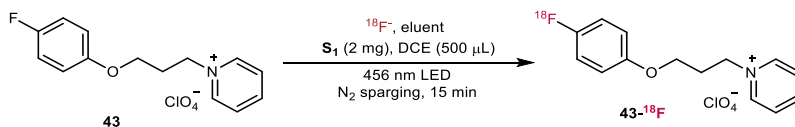

| Substrate | Product                  | Elution efficiency (EE)          | HPLC analysis conditions | RCC |
|-----------|--------------------------|----------------------------------|--------------------------|-----|
| <b>43</b> | <b>43-<sup>18</sup>F</b> | 14.2 mCi/(14.2 + 0.58) mCi = 96% | 40% MeCN (column B)      | 16% |

**Supplementary Table 51.** Elution efficiency and RCC calculation of **43-<sup>18</sup>F**.

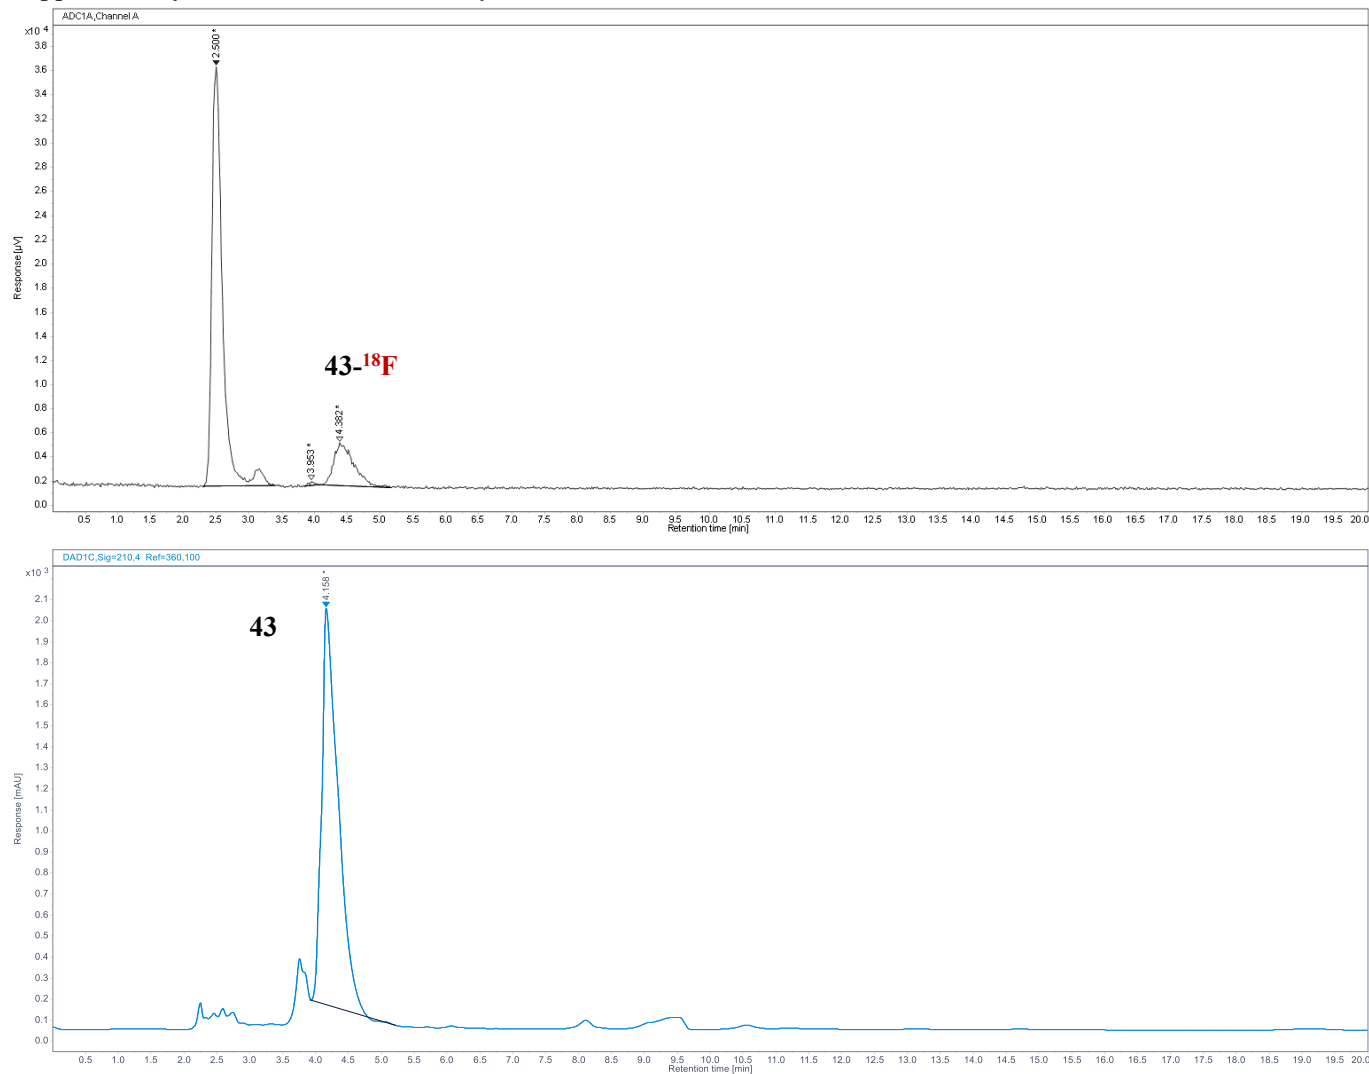

| # | RT (min) | Area (μV·s) | Area%         | Height    | Height% | Start time (min) | End time (min) |
|---|----------|-------------|---------------|-----------|---------|------------------|----------------|
| 1 | 2.500    | 386970.106  | 83.624        | 34721.801 | 90.01   | 2.303            | 3.390          |
| 2 | 3.953    | 1783.256    | 0.385         | 334.662   | 0.87    | 3.846            | 4.059          |
| 3 | 4.382    | 73998.582   | <b>15.991</b> | 3518.352  | 9.12    | 4.059            | 5.164          |

**Supplementary Figure 47.** Radio-HPLC analysis of **43-<sup>18</sup>F**.



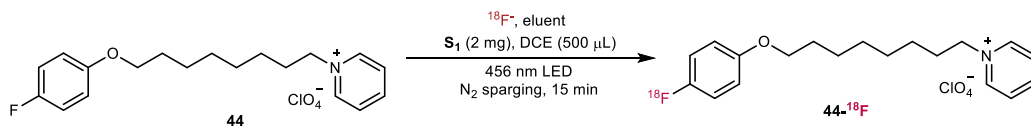

| Substrate | Product                  | Elution efficiency (EE)           | HPLC analysis conditions | RCC |
|-----------|--------------------------|-----------------------------------|--------------------------|-----|
| <b>44</b> | <b>44-<sup>18</sup>F</b> | 28.2 mCi/ (28.2 + 0.74) mCi = 97% | 60% MeCN                 | 36% |

**Supplementary Table 52.** Elution efficiency and RCC calculation of **44-<sup>18</sup>F**.

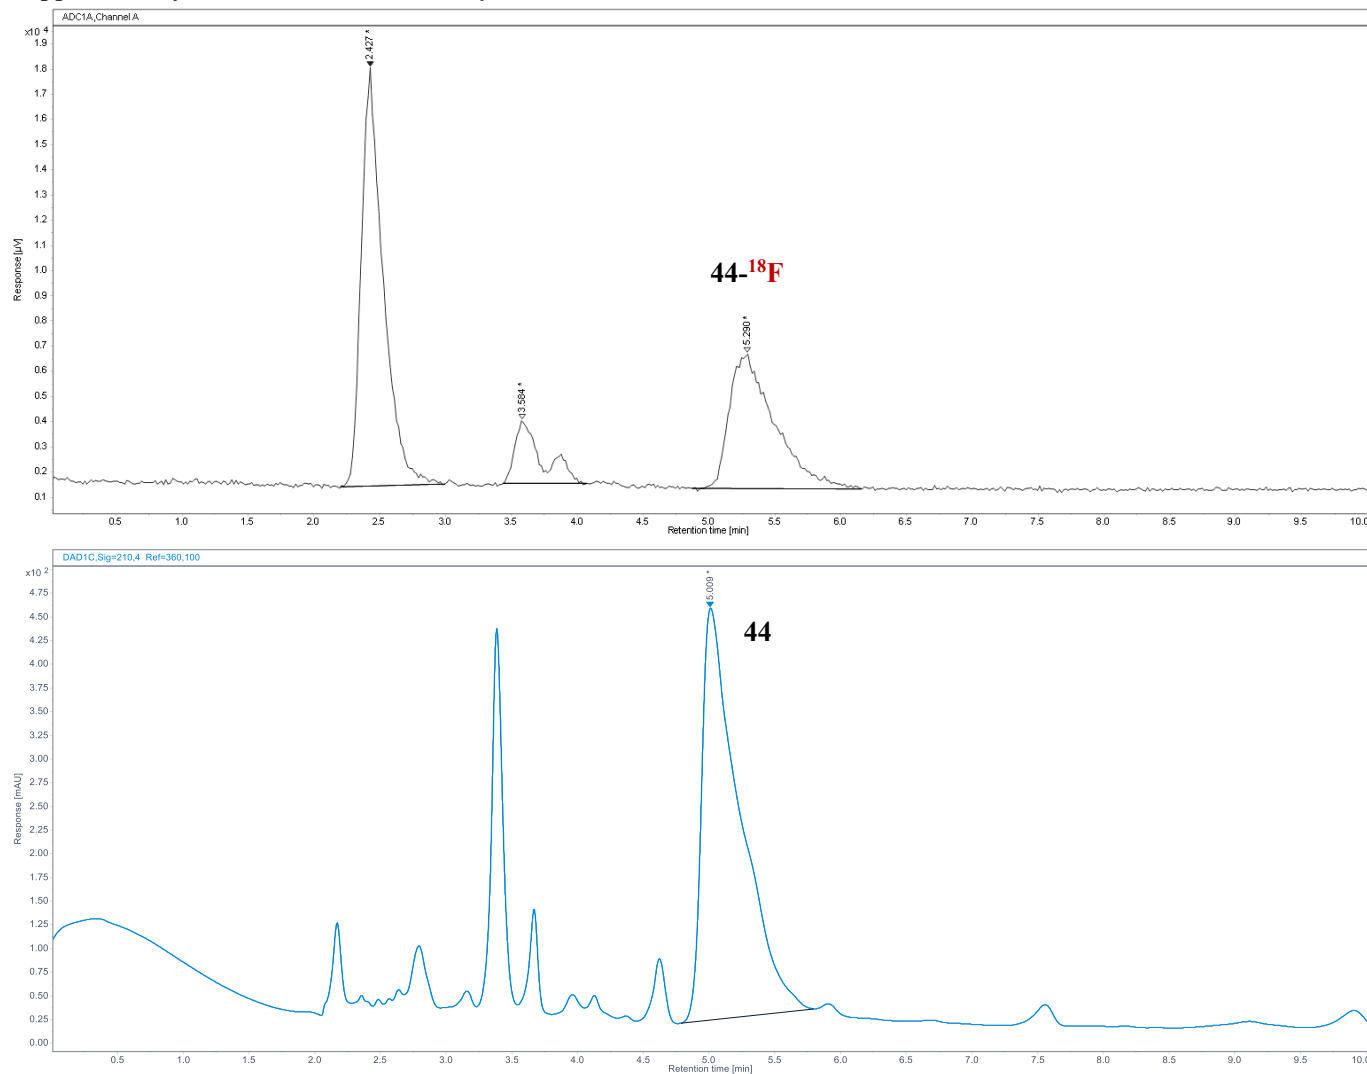

| # | RT (min) | Area (μV·s) | Area%         | Height    | Height% | Start time (min) | End time (min) |
|---|----------|-------------|---------------|-----------|---------|------------------|----------------|
| 1 | 2.427    | 191314.144  | 54.097        | 16625.277 | 67.88   | 2.203            | 2.993          |
| 2 | 3.584    | 35580.953   | 10.061        | 2508.375  | 10.24   | 3.436            | 4.071          |
| 3 | 5.290    | 126752.522  | <b>35.841</b> | 5356.932  | 21.87   | 4.874            | 6.156          |

**Supplementary Figure 48.** Radio-HPLC analysis of **44-<sup>18</sup>F**.

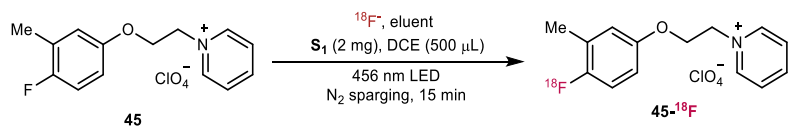

| Substrate | Product                  | Elution efficiency (EE)         | HPLC analysis conditions | RCC |
|-----------|--------------------------|---------------------------------|--------------------------|-----|
| <b>45</b> | <b>45-<sup>18</sup>F</b> | 14.3 mCi/(14.3 + 1.2) mCi = 92% | 40% MeCN (column B)      | 13% |

**Supplementary Table 53.** Elution efficiency and RCC calculation of **45-<sup>18</sup>F**.

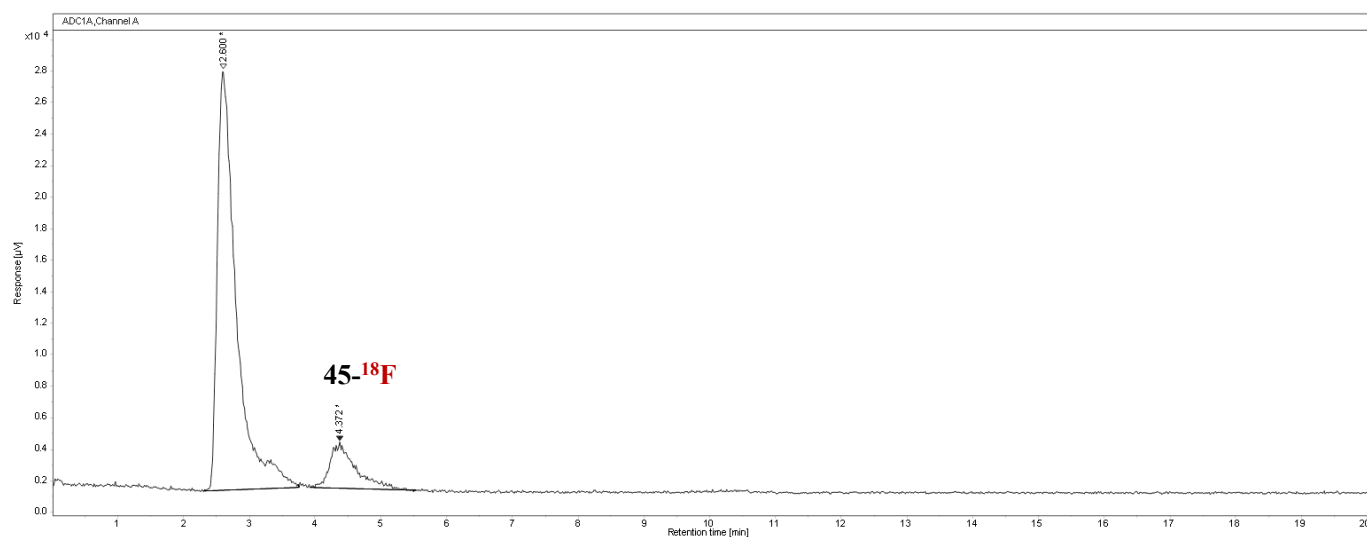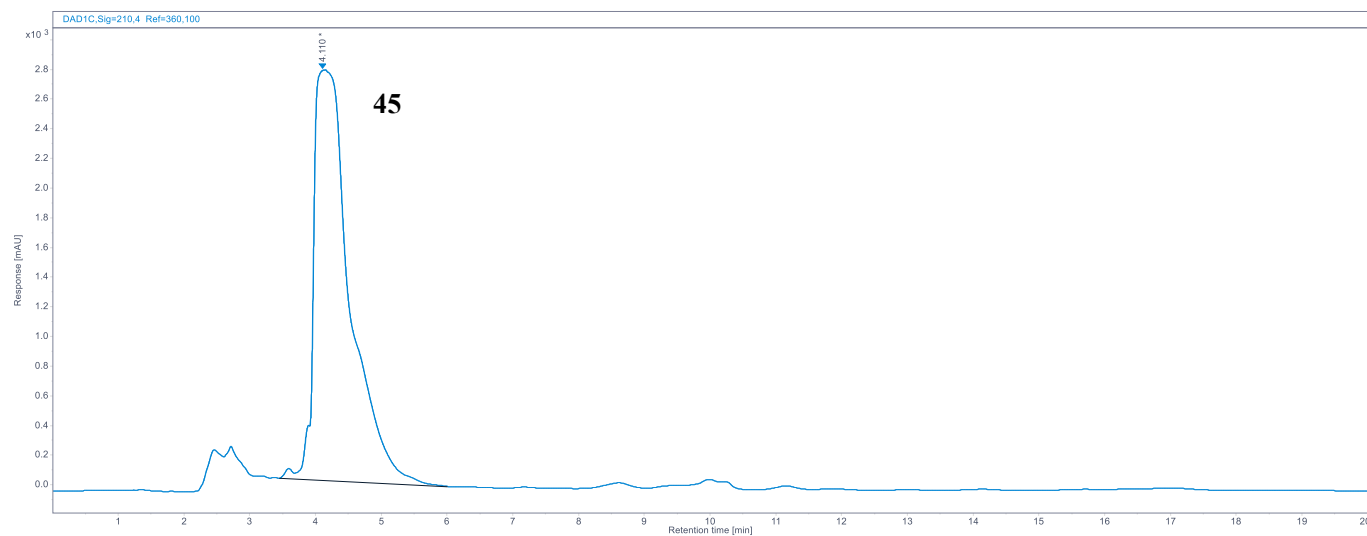

| # | RT (min) | Area (μV·s) | Area%         | Height    | Height% | Start time (min) | End time (min) |
|---|----------|-------------|---------------|-----------|---------|------------------|----------------|
| 1 | 2.600    | 533254.271  | 87.316        | 26670.229 | 90.13   | 2.301            | 3.744          |
| 2 | 4.372    | 77465.468   | <b>12.684</b> | 2921.985  | 9.87    | 3.924            | 5.530          |

**Supplementary Figure 49.** Radio-HPLC analysis of **45-<sup>18</sup>F**.

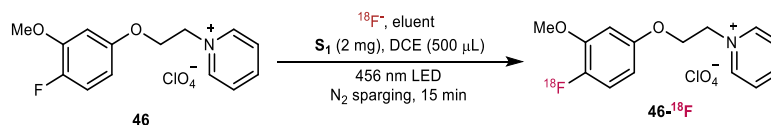

| Substrate | Product                  | Elution efficiency (EE)          | HPLC analysis conditions | RCC |
|-----------|--------------------------|----------------------------------|--------------------------|-----|
| <b>46</b> | <b>46-<sup>18</sup>F</b> | 8.18 mCi/(8.18 + 0.23) mCi = 97% | 35% MeCN (column B)      | 46% |

**Supplementary Table 54.** Elution efficiency and RCC calculation of **46-<sup>18</sup>F**.

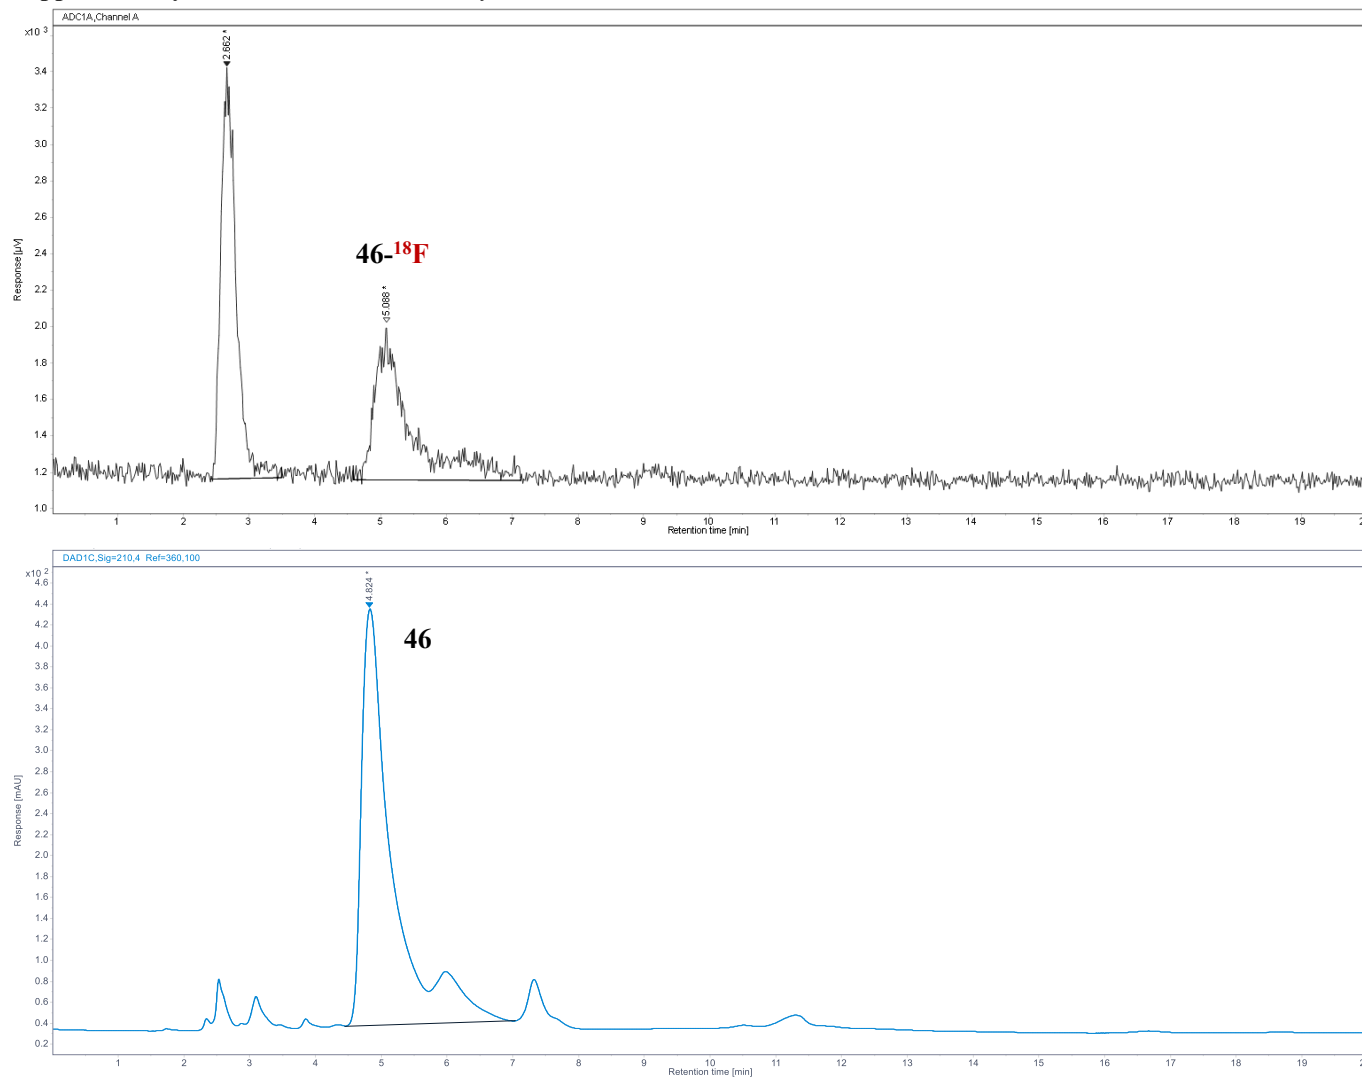

| # | RT (min) | Area (μV·s) | Area%         | Height   | Height% | Start time (min) | End time (min) |
|---|----------|-------------|---------------|----------|---------|------------------|----------------|
| 1 | 2.662    | 36093.611   | 53.891        | 2258.260 | 72.43   | 2.440            | 3.488          |
| 2 | 5.088    | 30881.122   | <b>46.109</b> | 859.591  | 27.57   | 4.584            | 7.128          |

**Supplementary Figure 50.** Radio-HPLC analysis of **46-<sup>18</sup>F**.

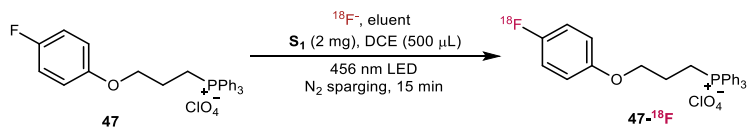

| Substrate | Product             | Elution efficiency (EE)          | HPLC analysis conditions | RCC |
|-----------|---------------------|----------------------------------|--------------------------|-----|
| 47        | 47- $^{18}\text{F}$ | 8.98 mCi/(8.98 + 0.56) mCi = 94% | 60% MeCN(column B)       | 47% |

**Supplementary Table 55.** Elution efficiency and RCC calculation of 47- $^{18}\text{F}$ .

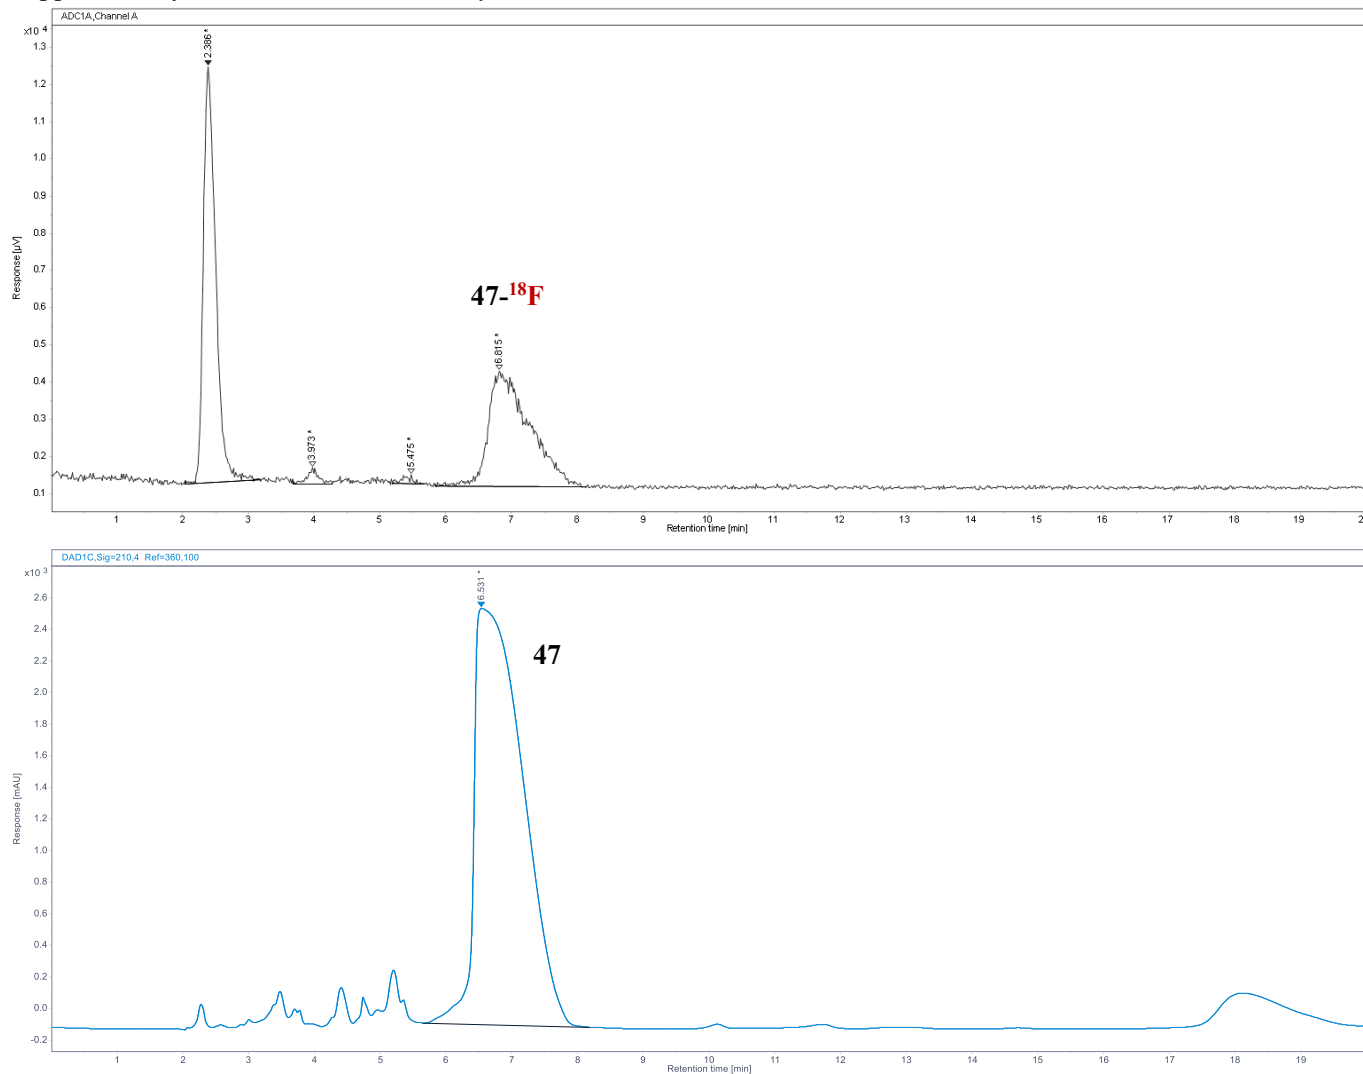

| # | RT (min) | Area (μV·s) | Area%         | Height    | Height% | Start time (min) | End time (min) |
|---|----------|-------------|---------------|-----------|---------|------------------|----------------|
| 1 | 2.386    | 147101.620  | 50.989        | 11192.459 | 74.76   | 2.036            | 3.182          |
| 2 | 3.973    | 4907.057    | 1.701         | 426.626   | 2.85    | 3.685            | 4.274          |
| 3 | 5.475    | 2261.127    | 0.784         | 236.991   | 1.58    | 5.187            | 5.675          |
| 4 | 6.815    | 134229.165  | <b>46.527</b> | 3115.039  | 20.81   | 5.846            | 8.130          |

**Supplementary Figure 51.** Radio-HPLC analysis of 47- $^{18}\text{F}$ .

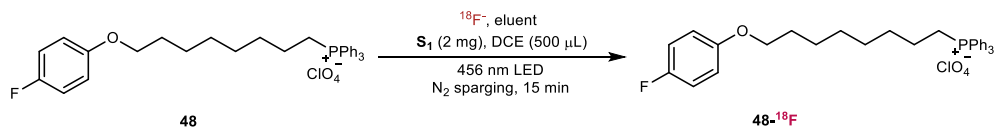

| Substrate | Product                              | Elution efficiency (EE)          | HPLC analysis conditions | RCC |
|-----------|--------------------------------------|----------------------------------|--------------------------|-----|
| <b>48</b> | <b>48-<math>^{18}\text{F}</math></b> | 3.95 mCi/(3.95 + 0.17) mCi = 96% | 60% MeCN                 | 62% |

**Supplementary Table 56.** Elution efficiency and RCC calculation of **48- $^{18}\text{F}$** .

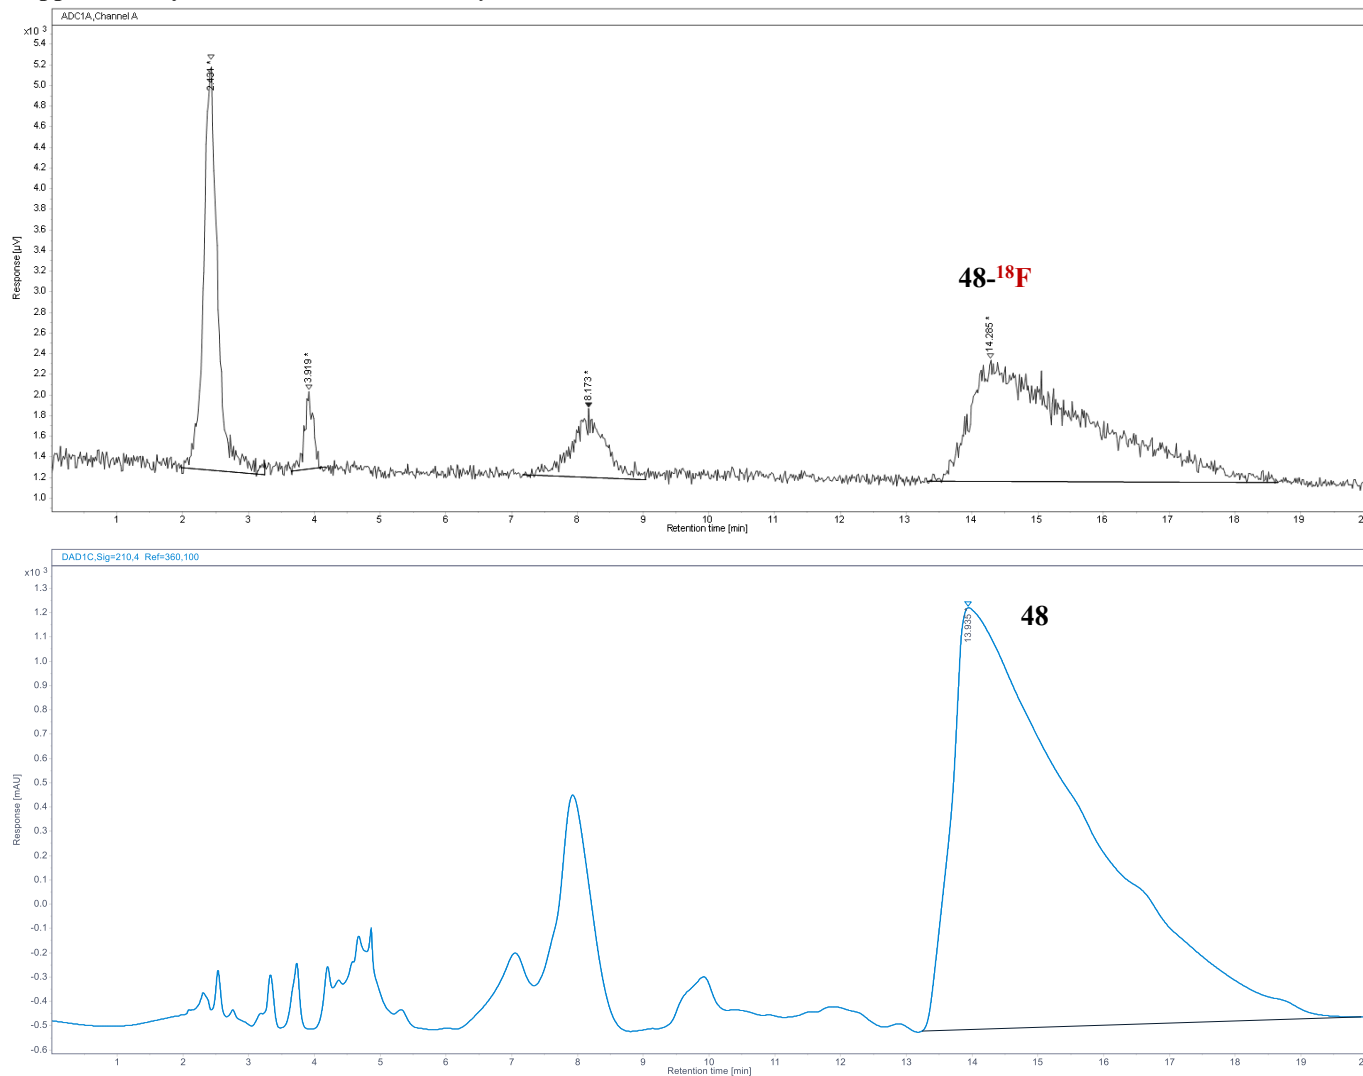

| # | RT (min) | Area ( $\mu\text{V} \cdot \text{s}$ ) | Area%         | Height   | Height% | Start time (min) | End time (min) |
|---|----------|---------------------------------------|---------------|----------|---------|------------------|----------------|
| 1 | 2.431    | 58767.153                             | 25.499        | 3972.321 | 60.36   | 1.978            | 3.247          |
| 2 | 3.919    | 6772.879                              | 2.939         | 756.058  | 11.49   | 3.647            | 4.171          |
| 3 | 8.173    | 22165.865                             | 9.618         | 667.574  | 10.14   | 7.178            | 9.040          |
| 4 | 14.285   | 142762.285                            | <b>61.944</b> | 1185.573 | 18.01   | 13.316           | 18.654         |

**Supplementary Figure 52.** Radio-HPLC analysis of **48- $^{18}\text{F}$** .

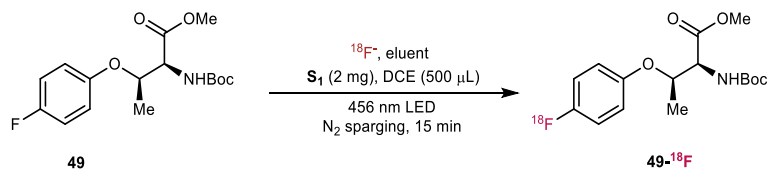

| Substrate | Product                  | Elution efficiency (EE)            | HPLC analysis conditions | RCC |
|-----------|--------------------------|------------------------------------|--------------------------|-----|
| <b>49</b> | <b>49-<sup>18</sup>F</b> | 11.23 mCi/(11.23 + 0.74) mCi = 94% | 60% MeCN                 | 25% |

**Supplementary Table 57.** Elution efficiency and RCC calculation of **49-<sup>18</sup>F**.

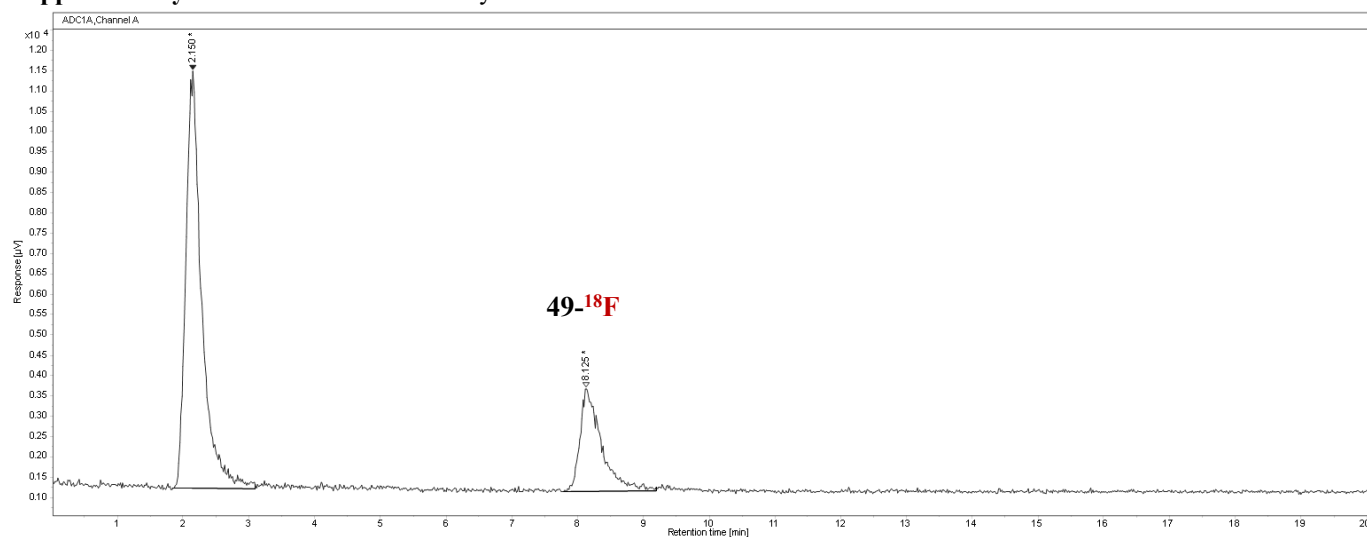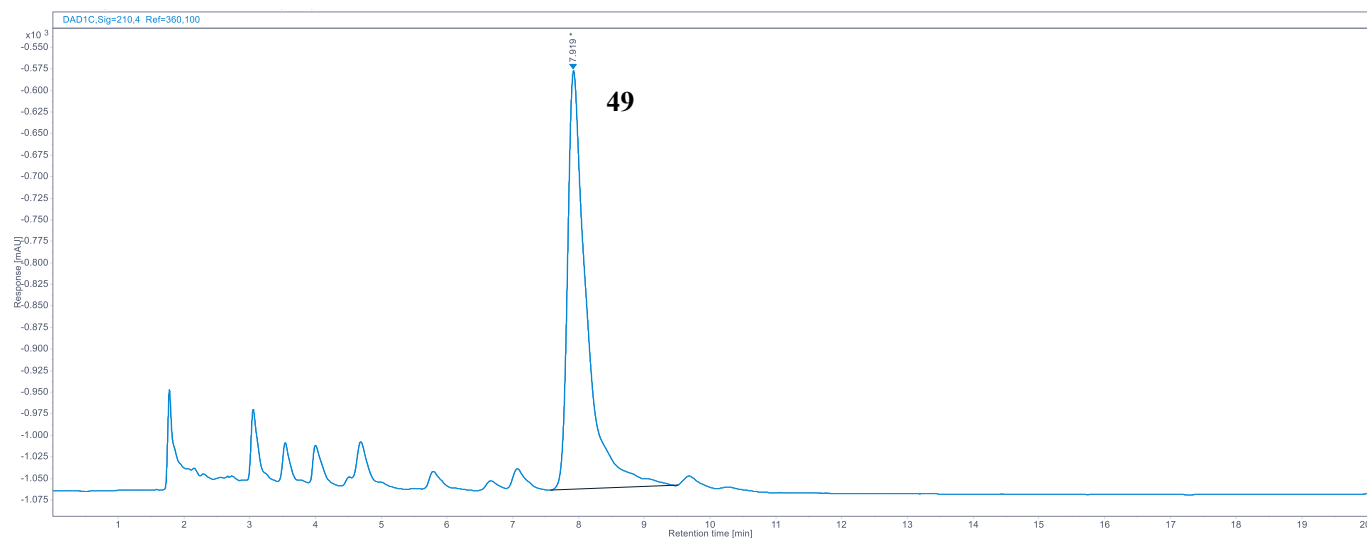

| # | RT (min) | Area (μV·s) | Area%         | Height    | Height% | Start time (min) | End time (min) |
|---|----------|-------------|---------------|-----------|---------|------------------|----------------|
| 1 | 2.150    | 172052.227  | 74.990        | 10258.638 | 80.22   | 1.849            | 3.095          |
| 2 | 8.125    | 57382.623   | <b>25.010</b> | 2529.306  | 19.78   | 7.779            | 9.199          |

**Supplementary Figure 53.** Radio-HPLC analysis of **49-<sup>18</sup>F**.

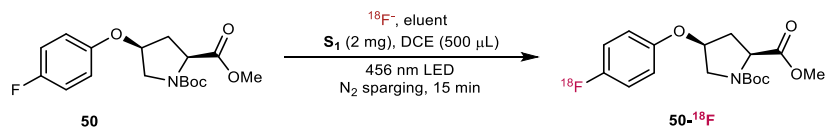

| Substrate | Product                  | Elution efficiency (EE)           | HPLC analysis conditions | RCC |
|-----------|--------------------------|-----------------------------------|--------------------------|-----|
| <b>50</b> | <b>50-<sup>18</sup>F</b> | 10.48 mCi/(10.48 + 0.2) mCi = 98% | 65% MeCN                 | 42% |

**Supplementary Table 58.** Elution efficiency and RCC calculation of **50-<sup>18</sup>F**.

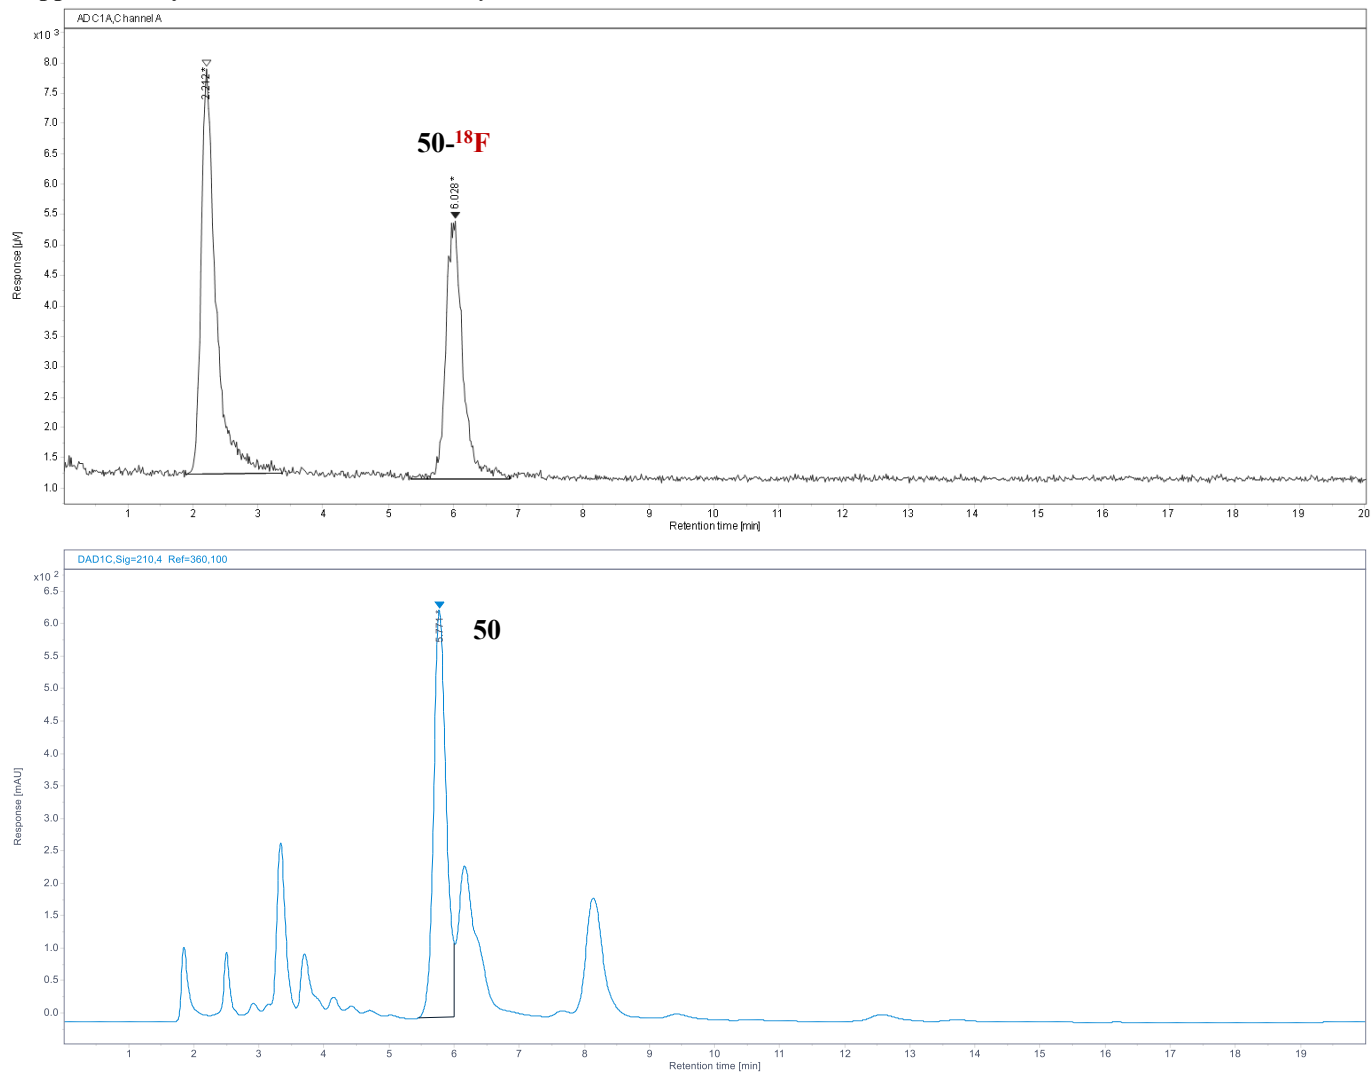

| # | RT (min) | Area (μV·s) | Area%         | Height   | Height% | Start time (min) | End time (min) |
|---|----------|-------------|---------------|----------|---------|------------------|----------------|
| 1 | 2.212    | 106394.107  | 58.026        | 6688.351 | 61.15   | 1.903            | 3.370          |
| 2 | 6.028    | 76962.017   | <b>41.974</b> | 4250.157 | 38.85   | 5.351            | 6.861          |

**Supplementary Figure 54.** Radio-HPLC analysis of **50-<sup>18</sup>F**.

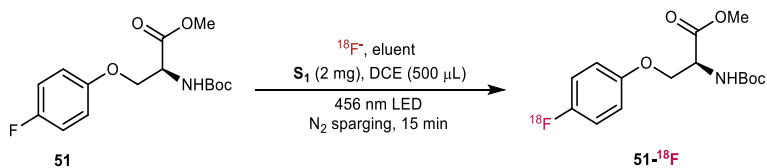

| Substrate | Product                  | Elution efficiency (EE)            | HPLC analysis conditions | RCC |
|-----------|--------------------------|------------------------------------|--------------------------|-----|
| <b>51</b> | <b>51-<sup>18</sup>F</b> | 18.42 mCi/(18.42 + 0.36) mCi = 98% | 55% MeCN                 | 23% |

**Supplementary Table 59.** Elution efficiency and RCC calculation of **51-<sup>18</sup>F**.

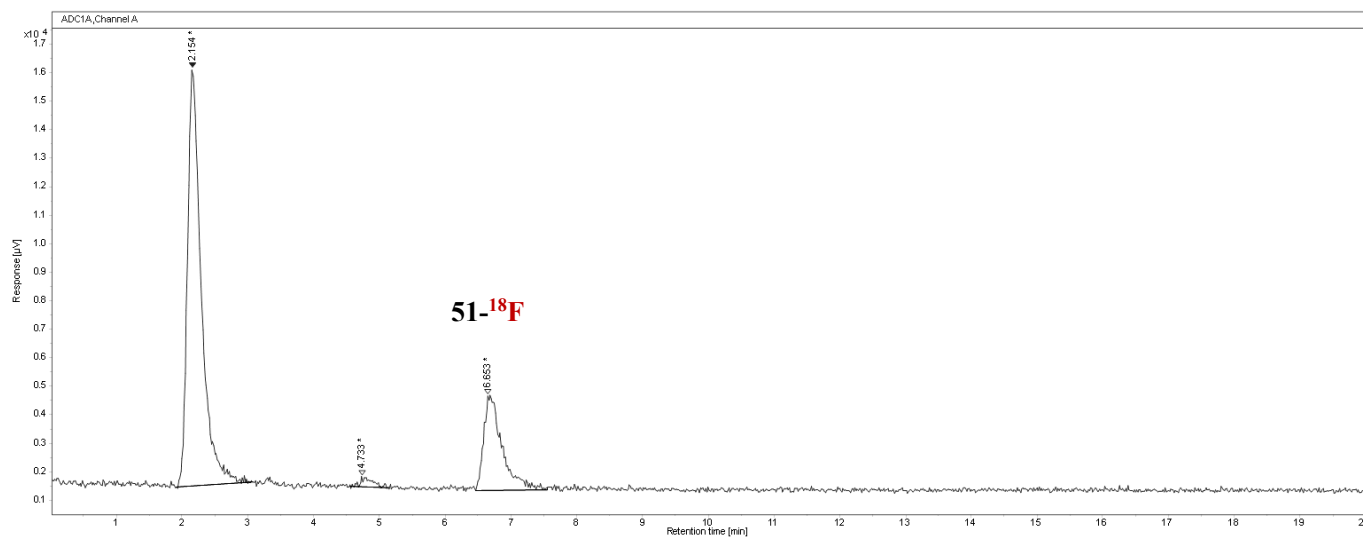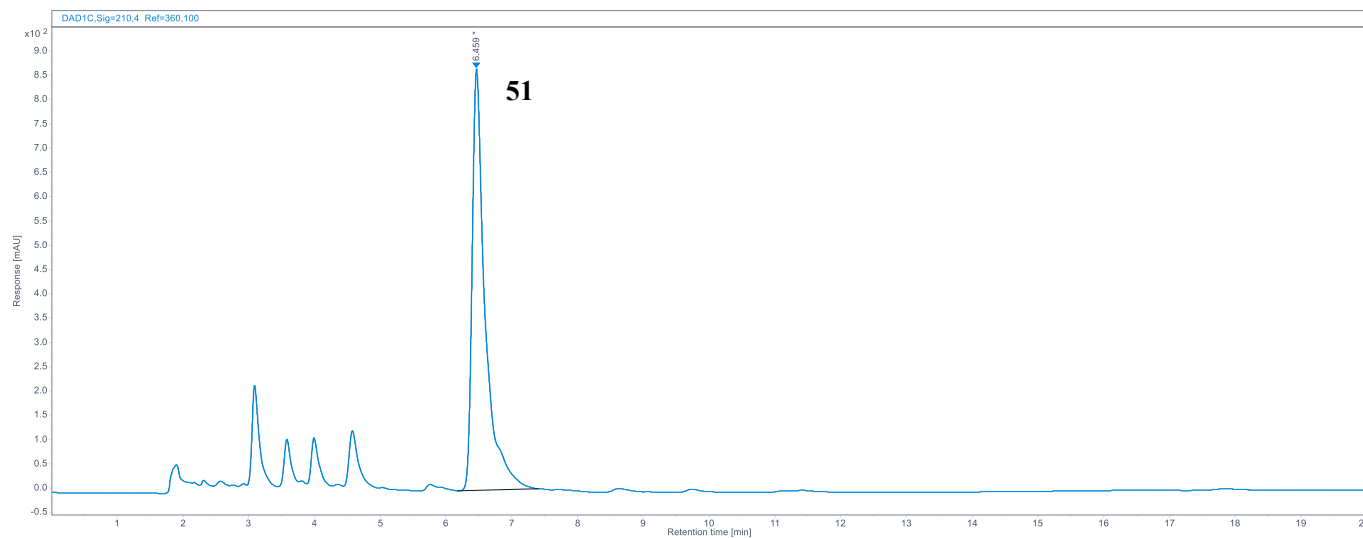

| # | RT (min) | Area (μV·s) | Area%         | Height    | Height% | Start time (min) | End time (min) |
|---|----------|-------------|---------------|-----------|---------|------------------|----------------|
| 1 | 2.154    | 214867.364  | 75.573        | 14659.198 | 79.82   | 1.910            | 3.067          |
| 2 | 4.733    | 4526.215    | 1.592         | 365.579   | 1.99    | 4.554            | 5.124          |
| 3 | 6.653    | 64925.701   | <b>22.835</b> | 3339.407  | 18.18   | 6.467            | 7.553          |

**Supplementary Figure 55.** Radio-HPLC analysis of **51-<sup>18</sup>F**.



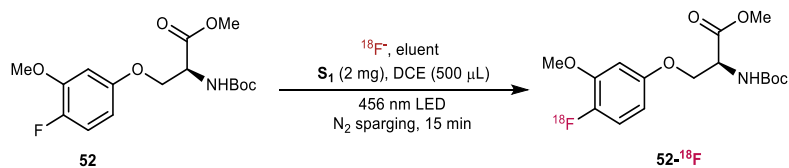

| Substrate | Product                  | Elution efficiency (EE)            | HPLC analysis conditions | RCC |
|-----------|--------------------------|------------------------------------|--------------------------|-----|
| <b>52</b> | <b>52-<sup>18</sup>F</b> | 16.28 mCi/(16.28 + 0.42) mCi = 98% | 60% MeCN                 | 51% |

**Supplementary Table 60.** Elution efficiency and RCC calculation of **52-<sup>18</sup>F**.

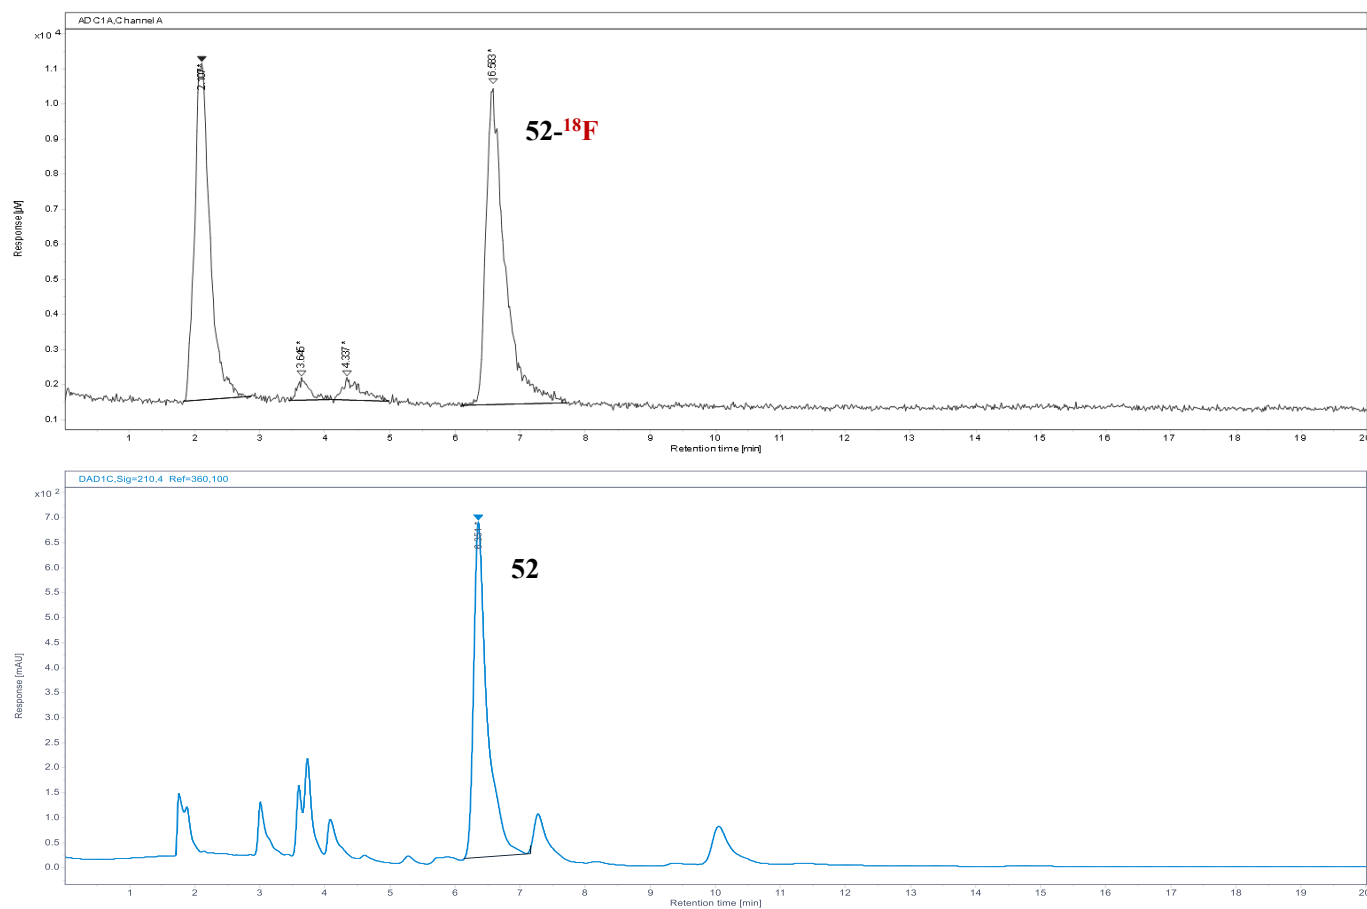

| # | RT (min) | Area (μV·s) | Area%         | Height   | Height% | Start time (min) | End time (min) |
|---|----------|-------------|---------------|----------|---------|------------------|----------------|
| 1 | 2.107    | 157433.175  | 43.640        | 9603.605 | 48.04   | 1.832            | 2.864          |
| 2 | 3.645    | 8232.535    | 2.282         | 651.690  | 3.26    | 3.452            | 4.124          |
| 3 | 4.337    | 12097.183   | 3.353         | 631.560  | 3.16    | 4.124            | 4.977          |
| 4 | 6.583    | 182988.687  | <b>50.724</b> | 9104.677 | 45.54   | 6.117            | 7.714          |

**Supplementary Figure 56.** Radio-HPLC analysis of **52-<sup>18</sup>F**.

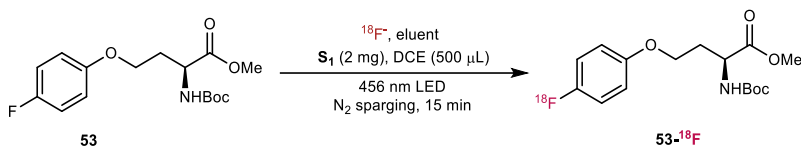

| Substrate | Product                  | Elution efficiency (EE)          | HPLC analysis conditions | RCC |
|-----------|--------------------------|----------------------------------|--------------------------|-----|
| <b>53</b> | <b>53-<sup>18</sup>F</b> | 30.8 mCi/(30.8 + 1.25) mCi = 96% | 55% MeCN                 | 52% |

**Supplementary Table 61.** Elution efficiency and RCC calculation of **53-<sup>18</sup>F**.

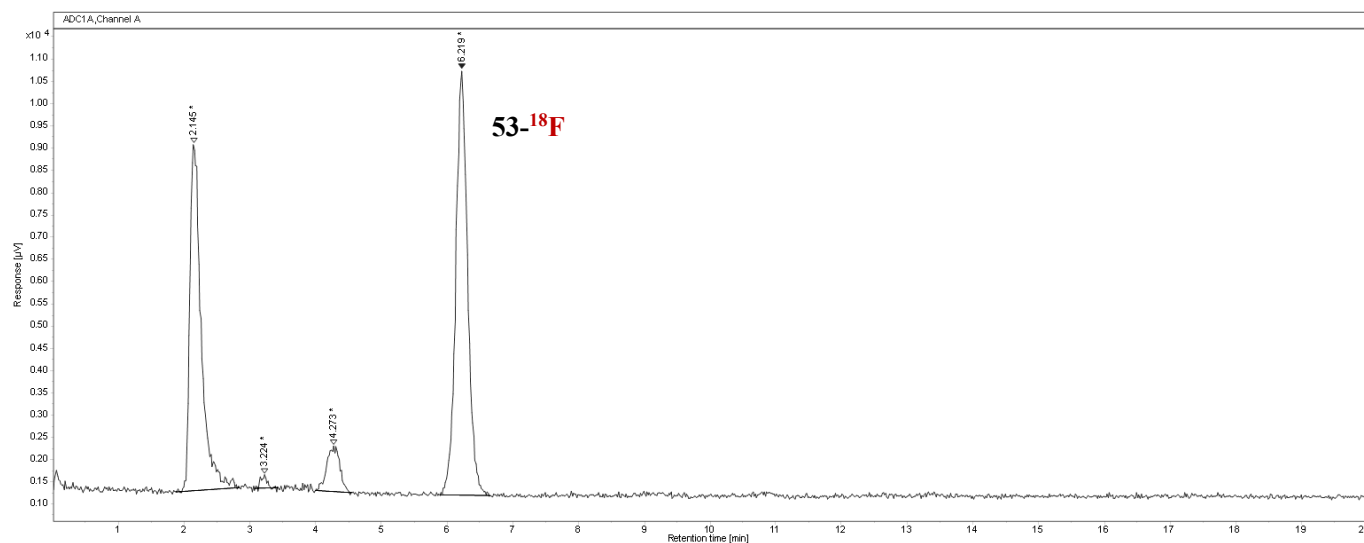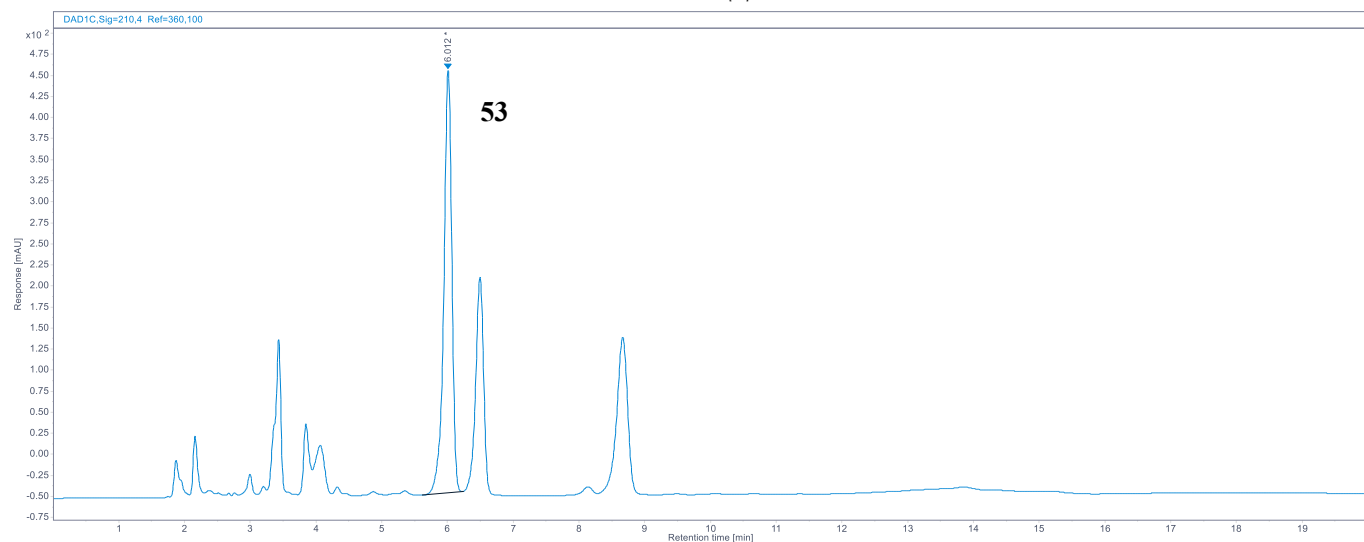

| # | RT (min) | Area ( $\mu\text{V}\cdot\text{s}$ ) | Area%         | Height   | Height% | Start time (min) | End time (min) |
|---|----------|-------------------------------------|---------------|----------|---------|------------------|----------------|
| 1 | 2.145    | 94631.634                           | 41.300        | 7786.617 | 41.67   | 1.879            | 2.840          |
| 2 | 3.224    | 1859.577                            | 0.812         | 310.129  | 1.66    | 3.081            | 3.429          |
| 3 | 4.273    | 13879.321                           | 6.057         | 1027.511 | 5.50    | 3.995            | 4.550          |
| 4 | 6.219    | 118760.069                          | <b>51.831</b> | 9562.581 | 51.17   | 5.895            | 6.651          |

**Supplementary Figure 57.** Radio-HPLC analysis of **53-<sup>18</sup>F**.

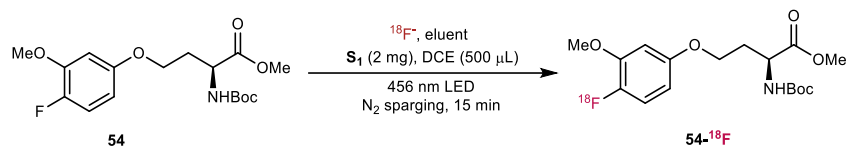

| Substrate | Product                  | Elution efficiency (EE)          | HPLC analysis conditions | RCC |
|-----------|--------------------------|----------------------------------|--------------------------|-----|
| <b>54</b> | <b>54-<sup>18</sup>F</b> | 9.31 mCi/(9.31 + 0.18) mCi = 98% | 60% MeCN                 | 61% |

**Supplementary Table 62.** Elution efficiency and RCC calculation of **54-<sup>18</sup>F**.

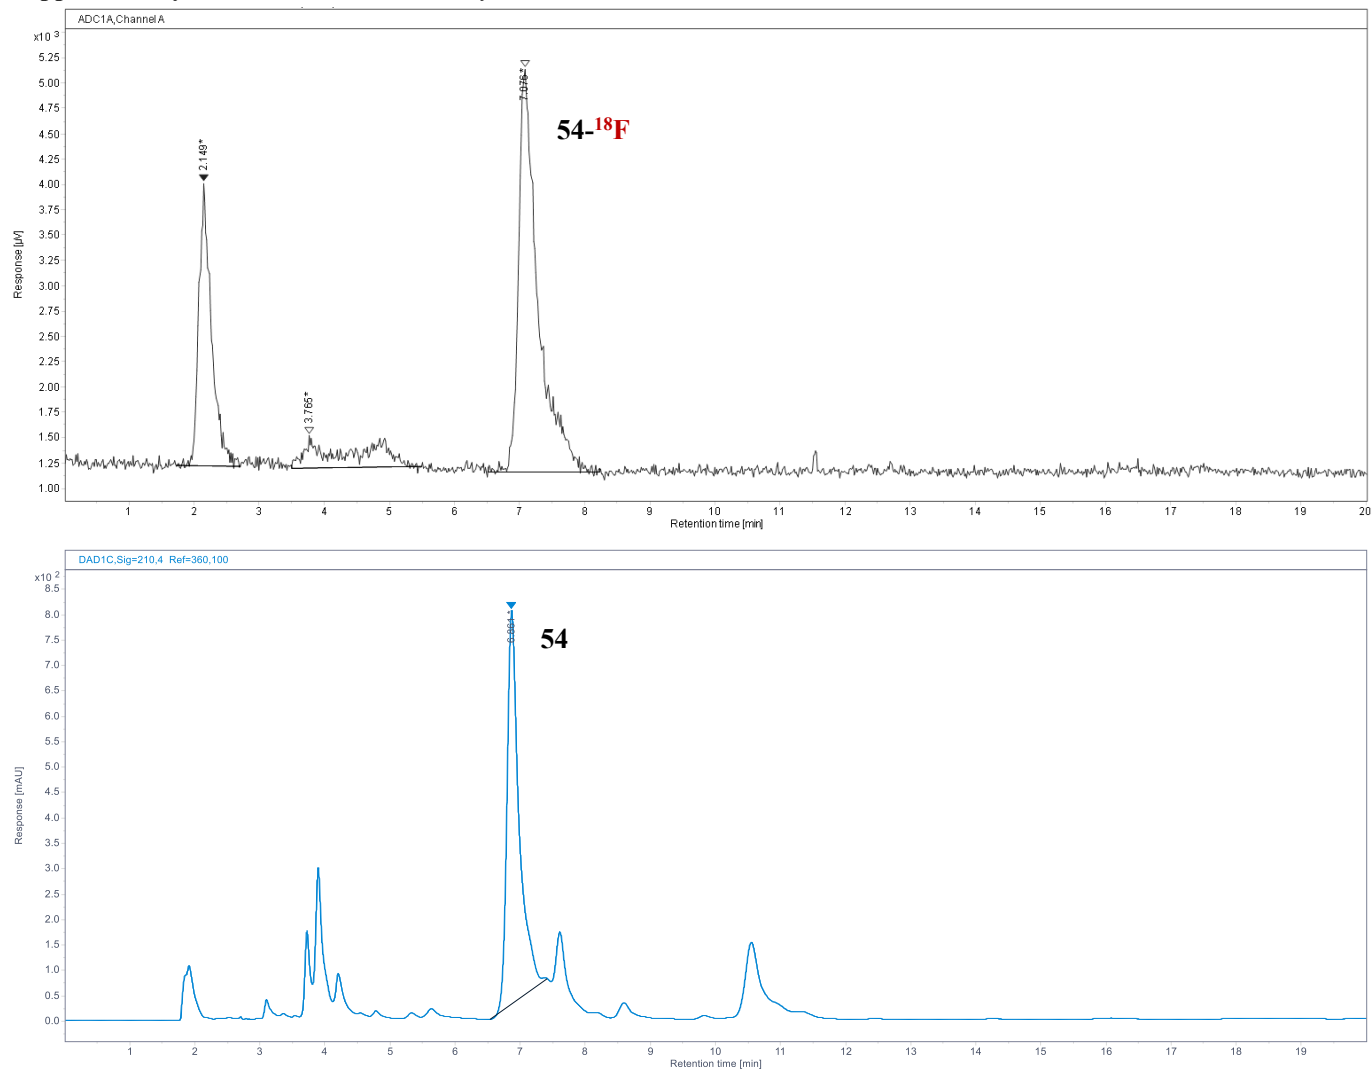

| # | RT (min) | Area (μV·s) | Area%         | Height   | Height% | Start time (min) | End time (min) |
|---|----------|-------------|---------------|----------|---------|------------------|----------------|
| 1 | 2.149    | 37360.795   | 27.719        | 2799.242 | 39.43   | 1.733            | 2.708          |
| 2 | 3.765    | 14914.523   | 11.066        | 319.345  | 4.50    | 3.494            | 5.485          |
| 3 | 7.076    | 82506.490   | <b>61.215</b> | 3980.207 | 56.07   | 6.514            | 8.221          |

**Supplementary Figure 58.** Radio-HPLC analysis of **54-<sup>18</sup>F**.

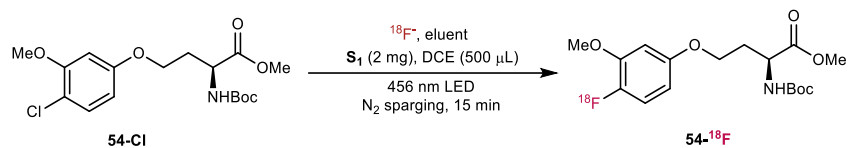

| Substrate    | Product                  | Elution efficiency (EE)          | HPLC analysis conditions | RCC |
|--------------|--------------------------|----------------------------------|--------------------------|-----|
| <b>54-Cl</b> | <b>54-<sup>18</sup>F</b> | 6.19 mCi/(6.19 + 0.12) mCi = 98% | 60% MeCN                 | 15% |

**Supplementary Table 63.** Elution efficiency and RCC calculation of **54-<sup>18</sup>F**.

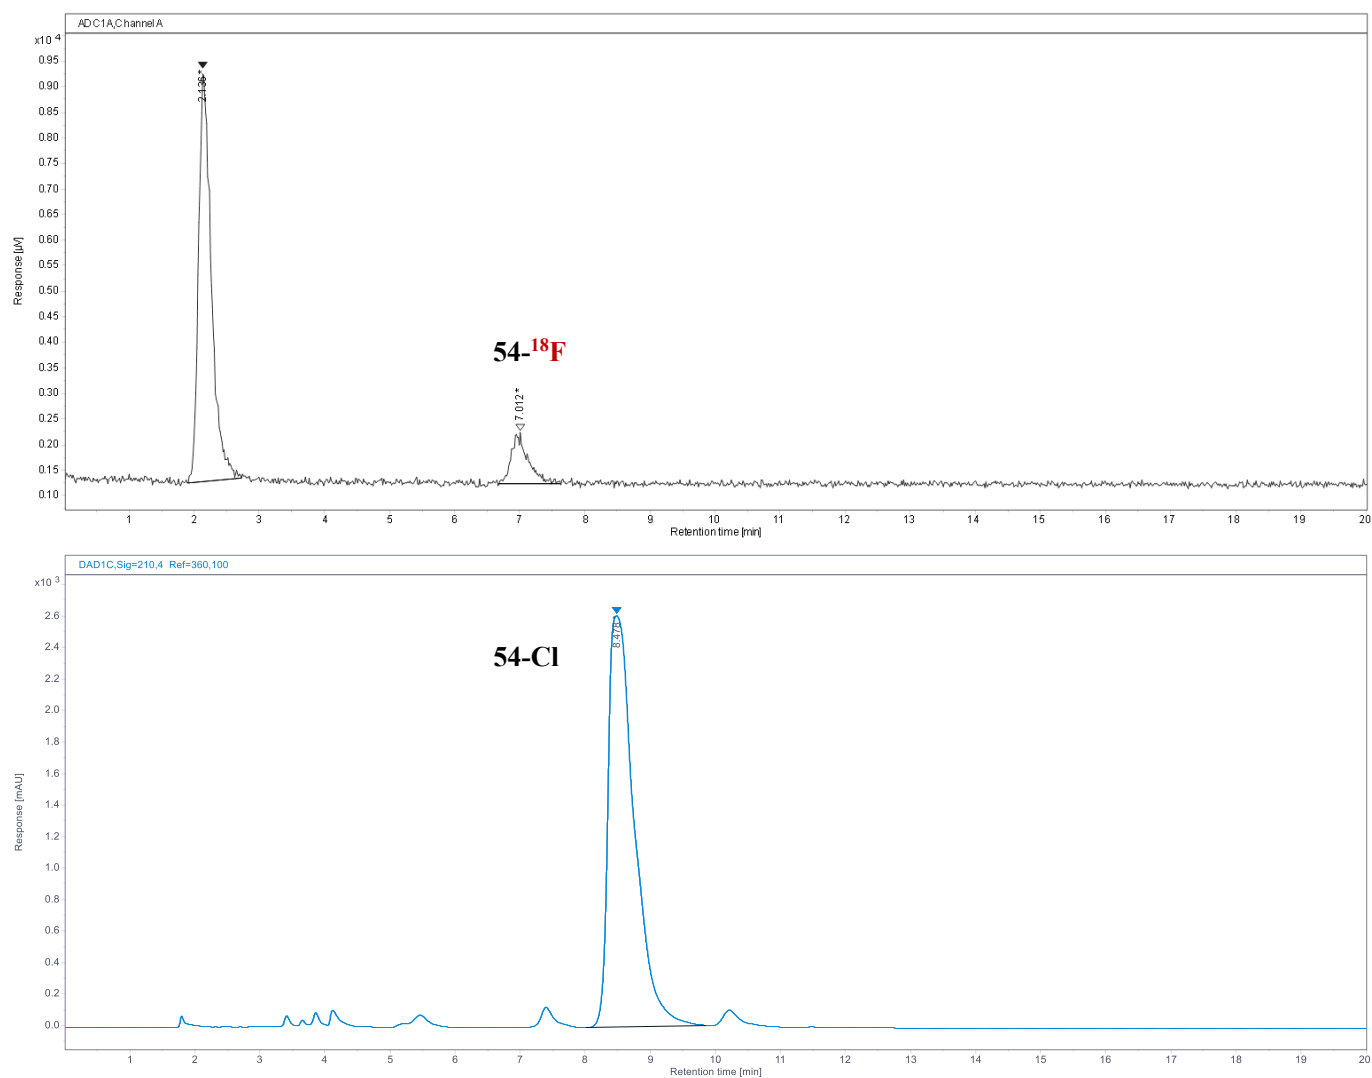

| # | RT (min) | Area (μV·s) | Area%         | Height   | Height% | Start time (min) | End time (min) |
|---|----------|-------------|---------------|----------|---------|------------------|----------------|
| 1 | 2.136    | 109219.868  | 85.530        | 8048.725 | 88.89   | 1.909            | 2.729          |
| 2 | 7.012    | 18477.442   | <b>14.470</b> | 1005.553 | 11.11   | 6.675            | 7.625          |

**Supplementary Figure 59.** Radio-HPLC analysis of **54-<sup>18</sup>F**.

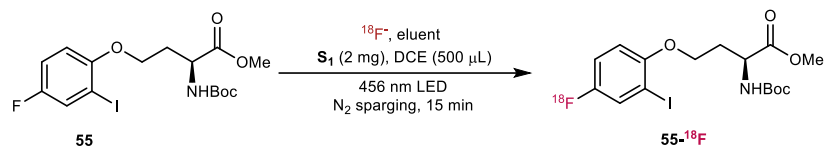

| Substrate | Product                  | Elution efficiency (EE)            | HPLC analysis conditions | RCC              |
|-----------|--------------------------|------------------------------------|--------------------------|------------------|
| <b>55</b> | <b>55-<sup>18</sup>F</b> | 6.71 mCi / (6.71 + 0.21) mCi = 97% | 70% MeCN                 | 21% <sup>a</sup> |

**Supplementary Table 64.** Elution efficiency and RCC calculation of **55-<sup>18</sup>F**. a. 0.02 mmol substrate

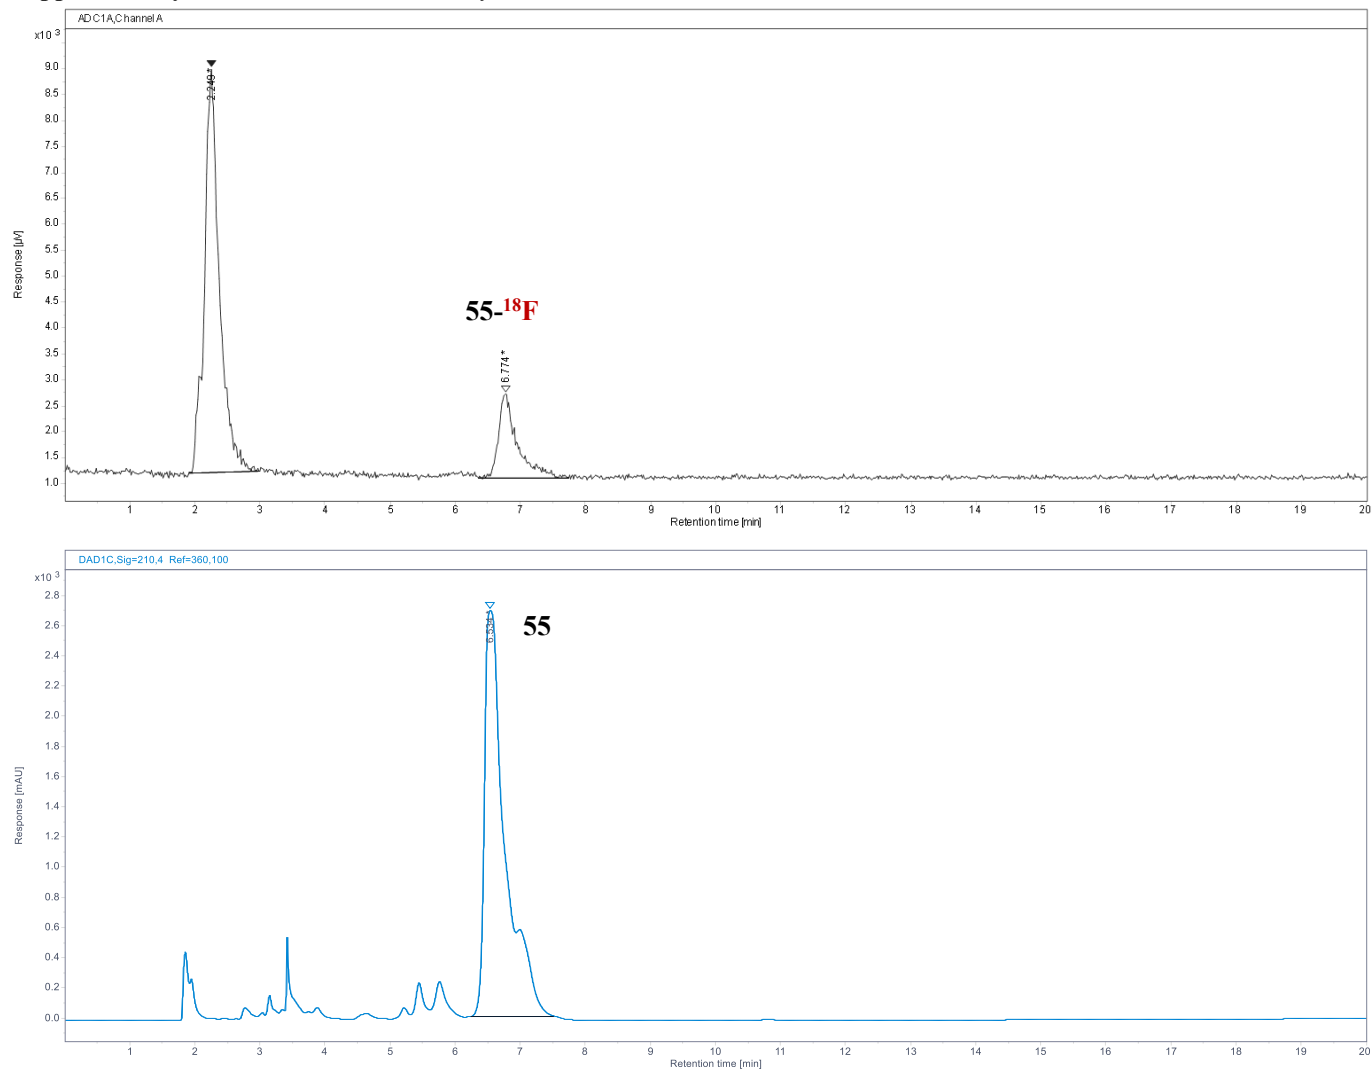

| # | RT (min) | Area (μV·s) | Area%         | Height   | Height% | Start time (min) | End time (min) |
|---|----------|-------------|---------------|----------|---------|------------------|----------------|
| 1 | 2.249    | 123984.497  | 79.469        | 7793.962 | 82.82   | 1.915            | 2.997          |
| 2 | 6.774    | 32031.697   | <b>20.531</b> | 1616.693 | 17.18   | 6.360            | 7.736          |

**Supplementary Figure 60.** Radio-HPLC analysis of **55-<sup>18</sup>F**.

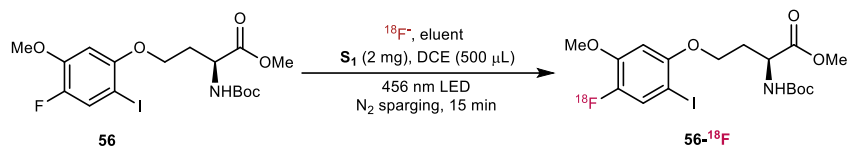

| Substrate | Product                              | Elution efficiency (EE)          | HPLC analysis conditions | RCC |
|-----------|--------------------------------------|----------------------------------|--------------------------|-----|
| <b>56</b> | <b>56-<math>^{18}\text{F}</math></b> | 7.45 mCi/ (7.45 + 0.3) mCi = 96% | 70% MeCN                 | 76% |

**Supplementary Table 65.** Elution efficiency and RCC calculation of **56- $^{18}\text{F}$** .

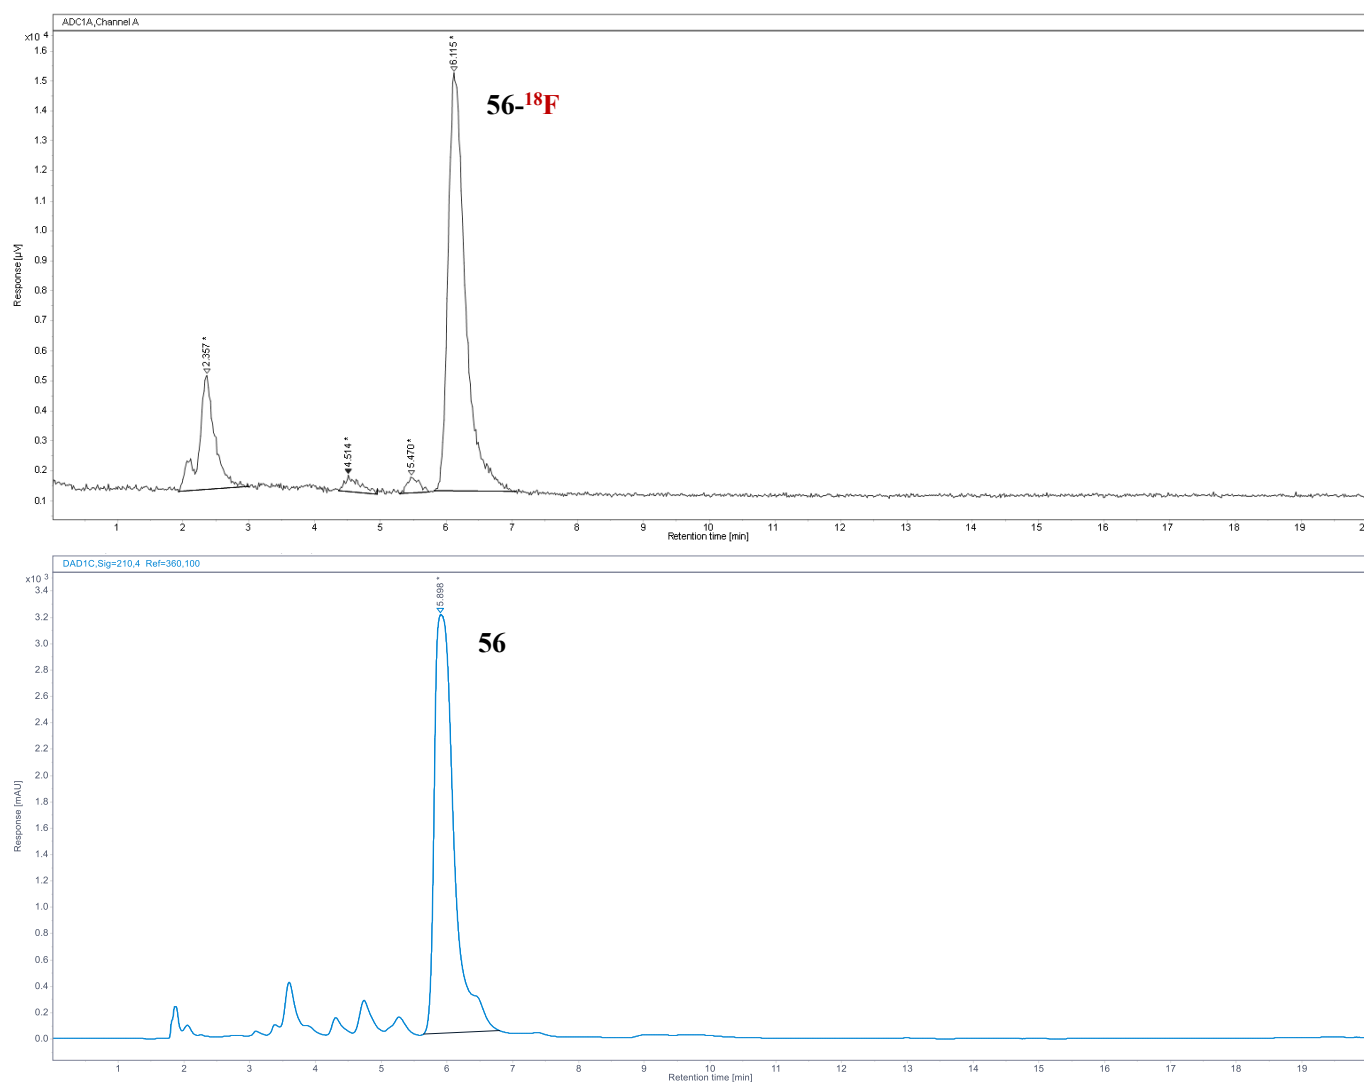

| # | RT (min) | Area ( $\mu\text{V}\cdot\text{s}$ ) | Area%         | Height    | Height% | Start time (min) | End time (min) |
|---|----------|-------------------------------------|---------------|-----------|---------|------------------|----------------|
| 1 | 2.357    | 65510.230                           | 19.528        | 3833.836  | 20.34   | 1.934            | 2.994          |
| 2 | 4.514    | 8314.156                            | 2.478         | 540.535   | 2.87    | 4.359            | 4.956          |
| 3 | 5.470    | 6823.166                            | 2.034         | 540.838   | 2.87    | 5.290            | 5.739          |
| 4 | 6.115    | 254812.677                          | <b>75.959</b> | 13935.769 | 73.93   | 5.811            | 7.055.         |

**Supplementary Figure 61.** Radio-HPLC analysis of **56- $^{18}\text{F}$** .

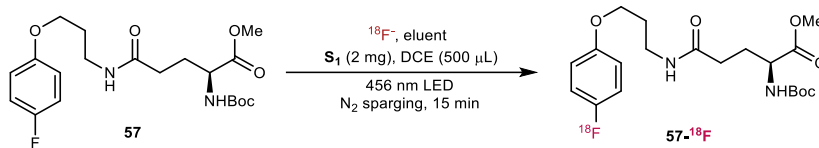

| Substrate | Product                  | Elution efficiency (EE)           | HPLC analysis conditions | RCC |
|-----------|--------------------------|-----------------------------------|--------------------------|-----|
| <b>57</b> | <b>57-<sup>18</sup>F</b> | 10.27 mCi/(10.27 + 0.7) mCi = 94% | 60% MeCN (column B)      | 54% |

**Supplementary Table 66.** Elution efficiency and RCC calculation of **57-<sup>18</sup>F**.

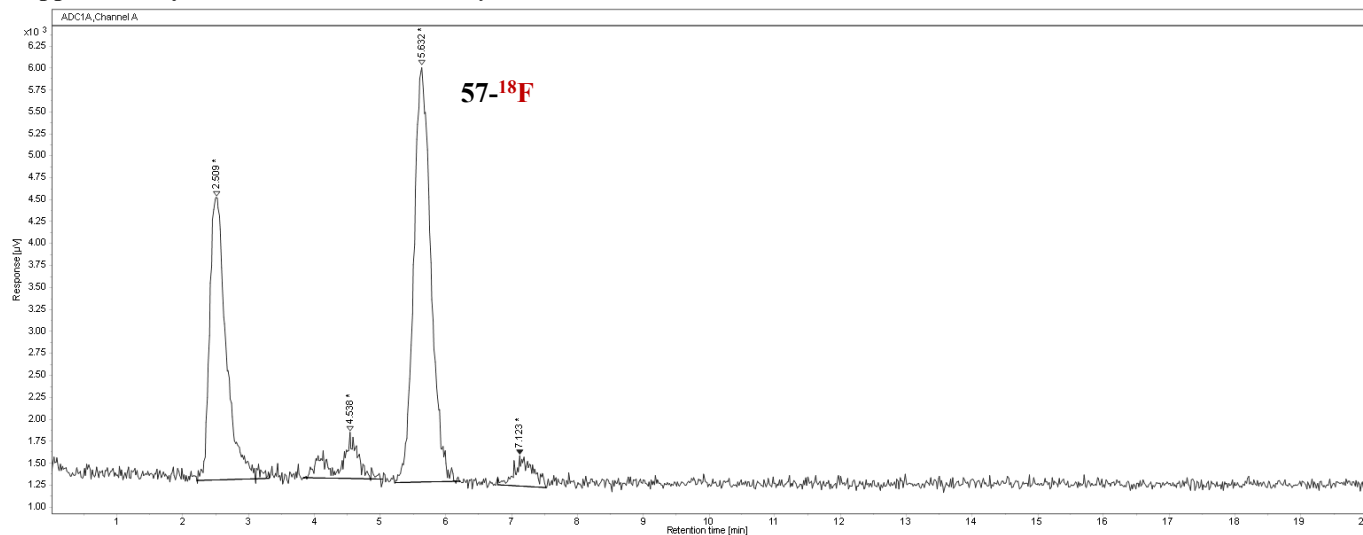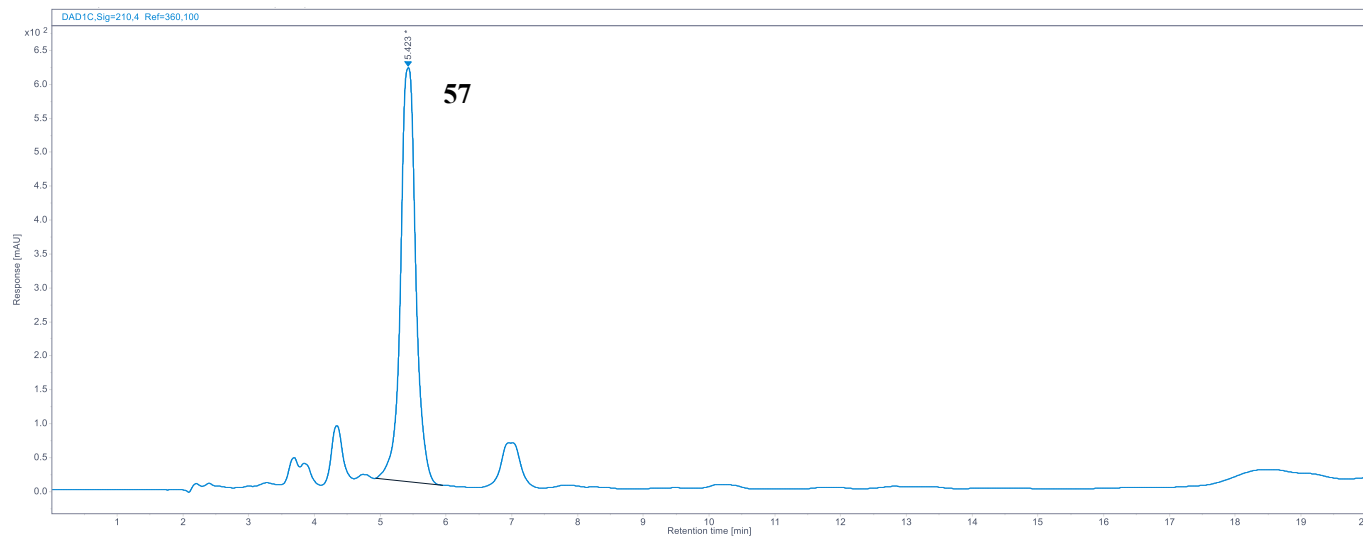

| # | RT (min) | Area (μV·s) | Area%         | Height   | Height% | Start time (min) | End time (min) |
|---|----------|-------------|---------------|----------|---------|------------------|----------------|
| 1 | 2.509    | 56691.679   | 35.596        | 3213.985 | 36.41   | 2.214            | 3.312          |
| 2 | 4.538    | 10474.257   | 6.577         | 528.594  | 5.99    | 3.834            | 5.042          |
| 3 | 5.632    | 85599.801   | <b>53.747</b> | 4732.705 | 53.62   | 5.220            | 6.220          |
| 4 | 7.123    | 6498.959    | 4.081         | 351.035  | 3.98    | 6.784            | 7.520          |

**Supplementary Figure 62.** Radio-HPLC analysis of **57-<sup>18</sup>F**.

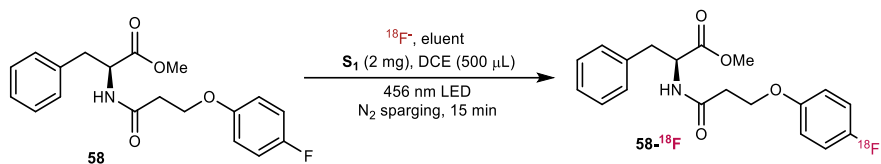

| Substrate | Product                  | Elution efficiency (EE)          | HPLC analysis conditions | RCC |
|-----------|--------------------------|----------------------------------|--------------------------|-----|
| <b>58</b> | <b>58-<sup>18</sup>F</b> | 7.39 mCi/(7.39 + 0.09) mCi = 99% | 55% MeCN                 | 34% |

**Supplementary Table 67.** Elution efficiency and RCC calculation of **58-<sup>18</sup>F**.

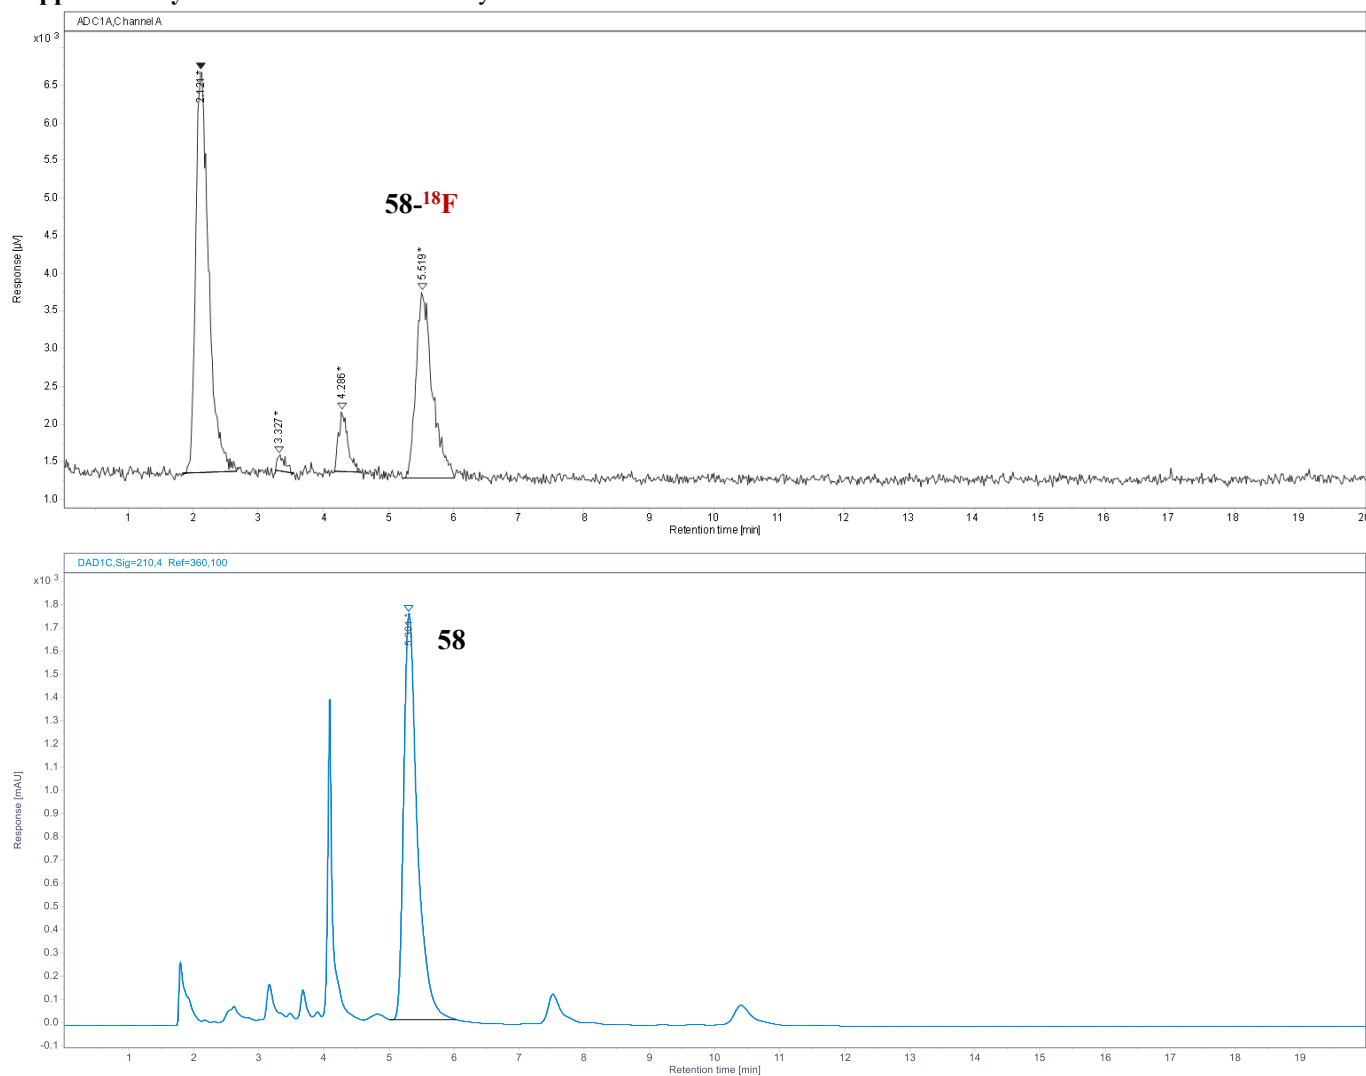

| # | RT (min) | Area (μV·s) | Area%         | Height   | Height% | Start time (min) | End time (min) |
|---|----------|-------------|---------------|----------|---------|------------------|----------------|
| 1 | 2.121    | 73831.406   | 58.205        | 5336.670 | 60.37   | 1.836            | 2.661          |
| 2 | 3.327    | 1728.767    | 1.363         | 214.306  | 2.42    | 3.268            | 3.551          |
| 3 | 4.286    | 7877.012    | 6.210         | 809.553  | 9.16    | 4.165            | 4.578          |
| 4 | 5.519    | 43409.546   | <b>34.222</b> | 2479.791 | 28.05   | 5.221            | 6.014          |

**Supplementary Figure 63.** Radio-HPLC analysis of **58-<sup>18</sup>F**.



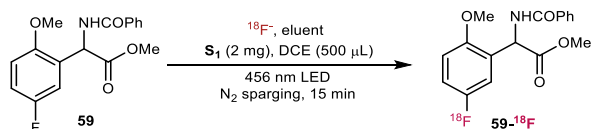

| Substrate | Product                  | Elution efficiency (EE)          | HPLC analysis conditions | RCC |
|-----------|--------------------------|----------------------------------|--------------------------|-----|
| <b>59</b> | <b>59-<sup>18</sup>F</b> | 11.4 mCi/(11.4 + 0.43) mCi = 96% | 50% MeCN                 | 73% |

**Supplementary Table 68.** Elution efficiency and RCC calculation of **59-<sup>18</sup>F**.

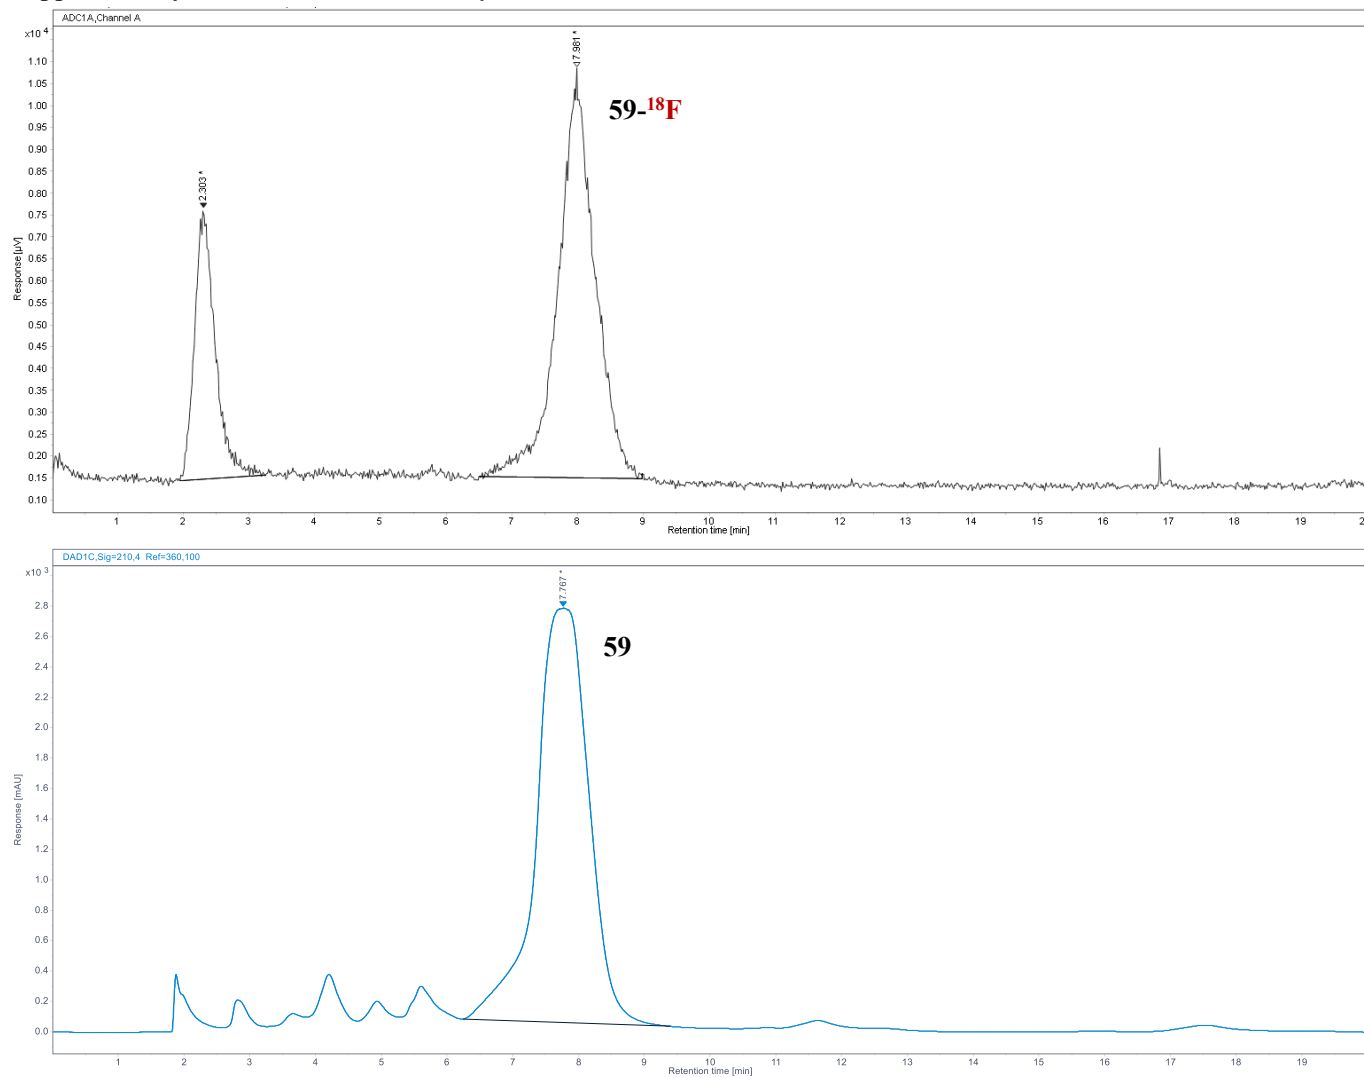

| # | RT (min) | Area (μV·s) | Area%         | Height   | Height% | Start time (min) | End time (min) |
|---|----------|-------------|---------------|----------|---------|------------------|----------------|
| 1 | 2.303    | 133761.189  | 27.134        | 6155.136 | 39.71   | 1.946            | 3.253          |
| 2 | 7.981    | 359209.066  | <b>72.866</b> | 9345.949 | 60.29   | 6.503            | 8.983          |

**Supplementary Figure 64.** Radio-HPLC analysis of **59-<sup>18</sup>F**.

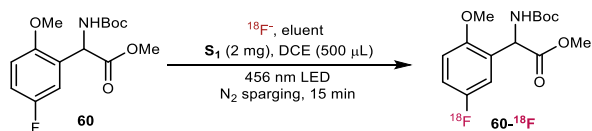

| Substrate | Product                  | Elution efficiency (EE)    | HPLC analysis conditions | RCC |
|-----------|--------------------------|----------------------------|--------------------------|-----|
| <b>60</b> | <b>60-<sup>18</sup>F</b> | 81 mCi/(81+17.2) mCi = 83% | 60% MeCN                 | 69% |

**Supplementary Table 69.** Elution efficiency and RCC calculation of **60-<sup>18</sup>F**.

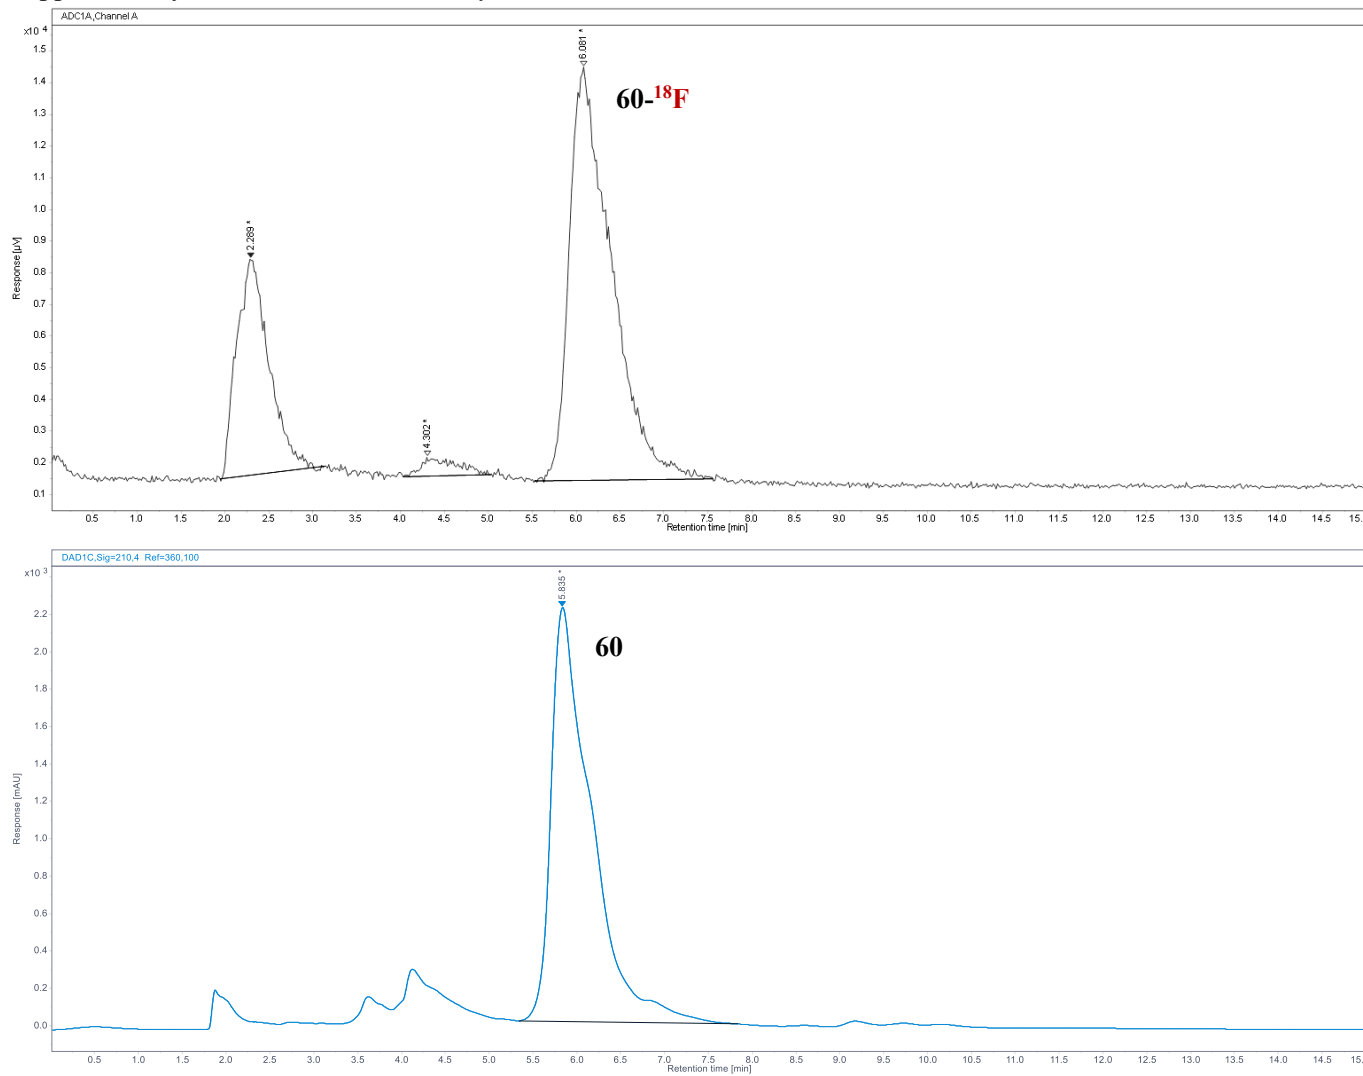

| # | RT (min) | Area (μV·s) | Area%         | Height    | Height% | Start time (min) | End time (min) |
|---|----------|-------------|---------------|-----------|---------|------------------|----------------|
| 1 | 2.289    | 174611.945  | 28.009        | 6826.337  | 33.35   | 1.942            | 3.143          |
| 2 | 4.302    | 16046.255   | 2.574         | 595.193   | 2.91    | 4.030            | 5.029          |
| 3 | 6.081    | 432761.614  | <b>69.417</b> | 13044.932 | 63.74   | 5.523            | 7.556          |

**Supplementary Figure 65.** Radio-HPLC analysis of **60-<sup>18</sup>F**.

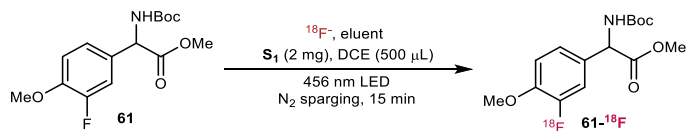

| Substrate | Product                  | Elution efficiency (EE)            | HPLC analysis conditions | RCC |
|-----------|--------------------------|------------------------------------|--------------------------|-----|
| <b>61</b> | <b>61-<sup>18</sup>F</b> | 116.2 mCi/(116.2 + 42.4) mCi = 73% | 55% MeCN                 | 23% |

**Supplementary Table 70.** Elution efficiency and RCC calculation of **61-<sup>18</sup>F**.

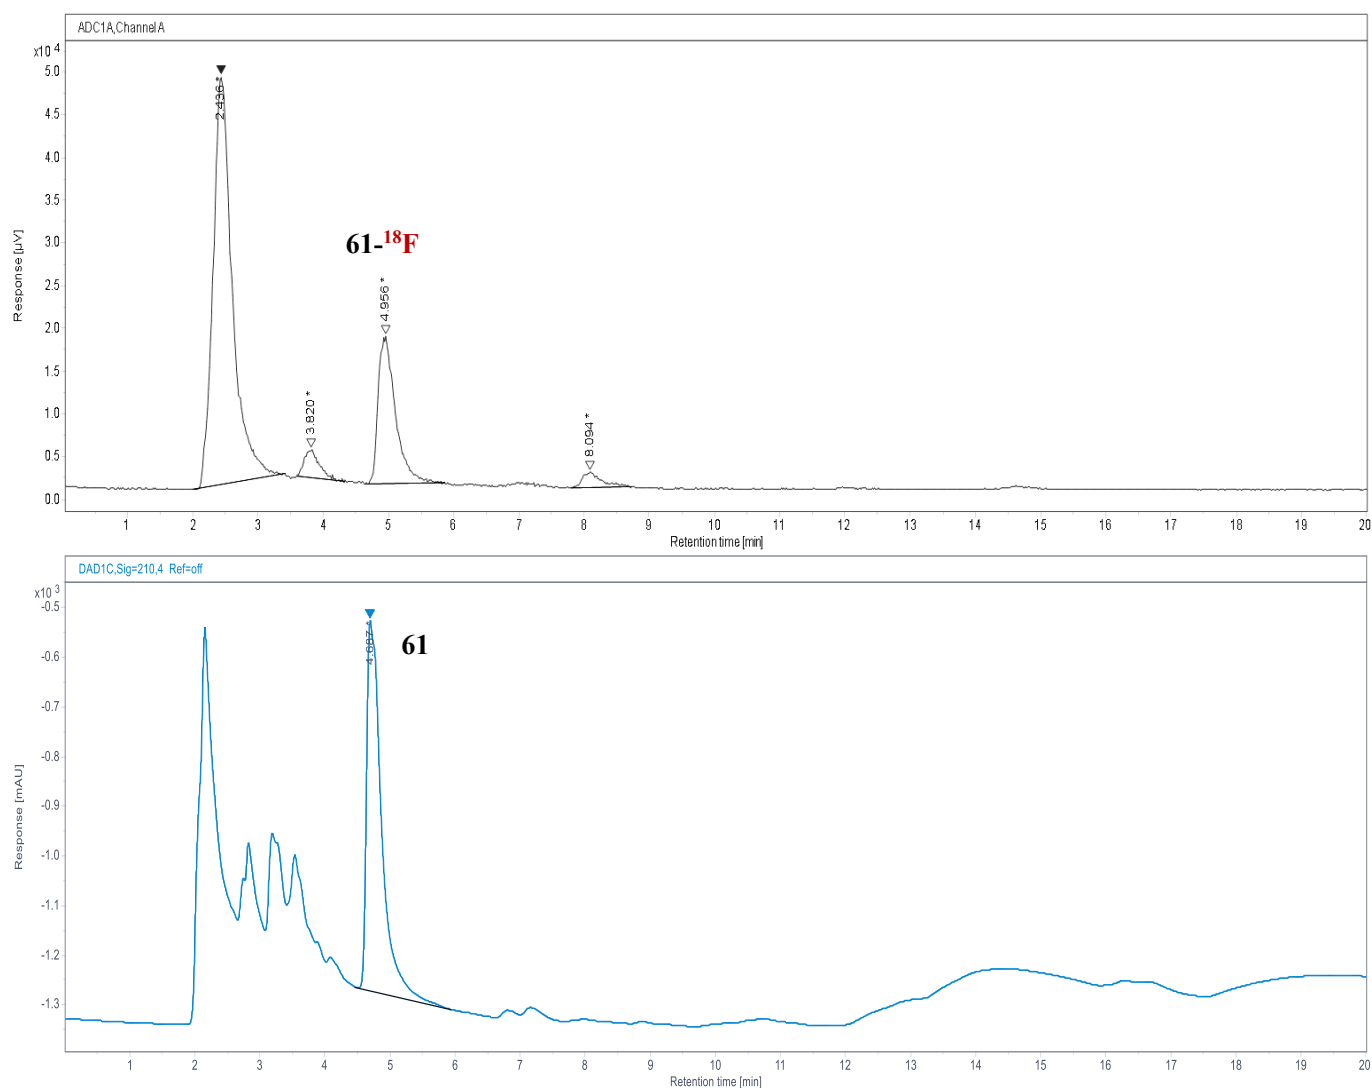

| # | RT (min) | Area ( $\mu\text{V}\cdot\text{s}$ ) | Area%         | Height ( $\mu\text{V}$ ) | Height% | Start time (min) | End time (min) |
|---|----------|-------------------------------------|---------------|--------------------------|---------|------------------|----------------|
| 1 | 2.436    | 980688.942                          | 70.700        | 47698.989                | 68.02   | 1.998            | 3.409          |
| 2 | 3.820    | 55270.625                           | 3.985         | 3395.141                 | 4.84    | 3.587            | 4.330          |
| 3 | 4.956    | 315200.171                          | <b>22.723</b> | 17165.205                | 24.48   | 4.642            | 5.860          |
| 4 | 8.094    | 35956.944                           | 2.592         | 1868.366                 | 2.66    | 7.814            | 8.723          |

**Supplementary Figure 66.** Radio-HPLC analysis of **61-<sup>18</sup>F**.

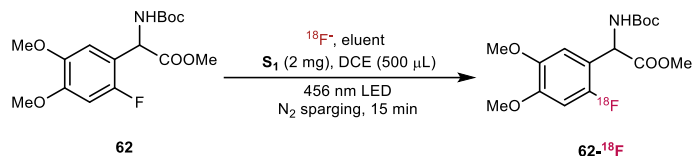

| Substrate | Product                  | Elution efficiency (EE)         | HPLC analysis conditions | RCC |
|-----------|--------------------------|---------------------------------|--------------------------|-----|
| <b>62</b> | <b>62-<sup>18</sup>F</b> | 13.8 mCi/(13.8 + 1.1) mCi = 93% | 50% MeCN                 | 47% |

**Supplementary Table 71.** Elution efficiency and RCC calculation of **62-<sup>18</sup>F**.

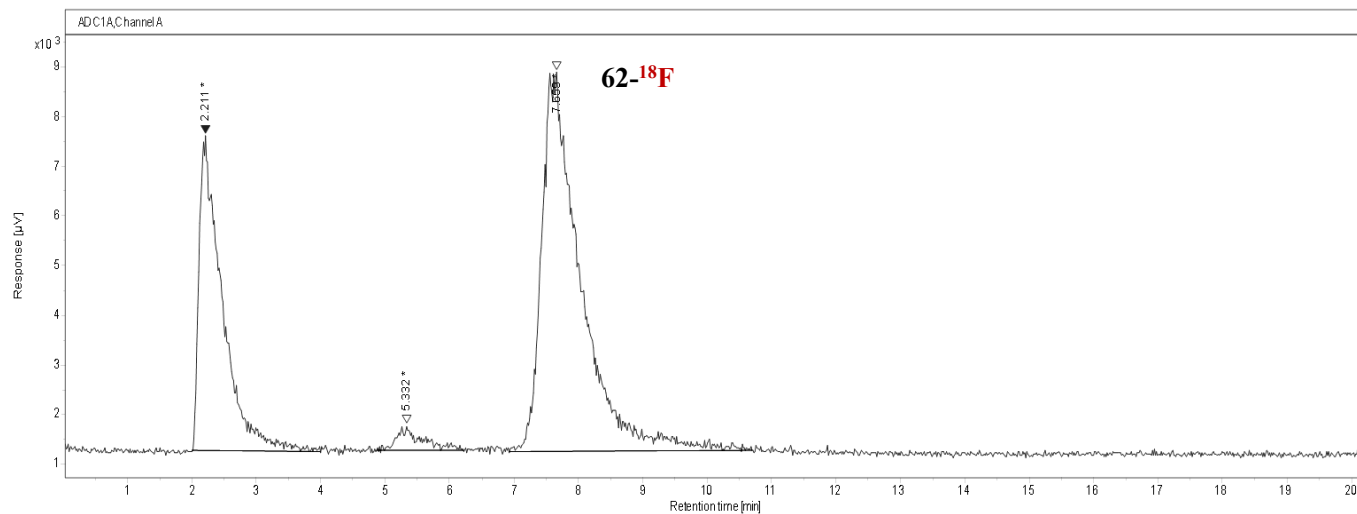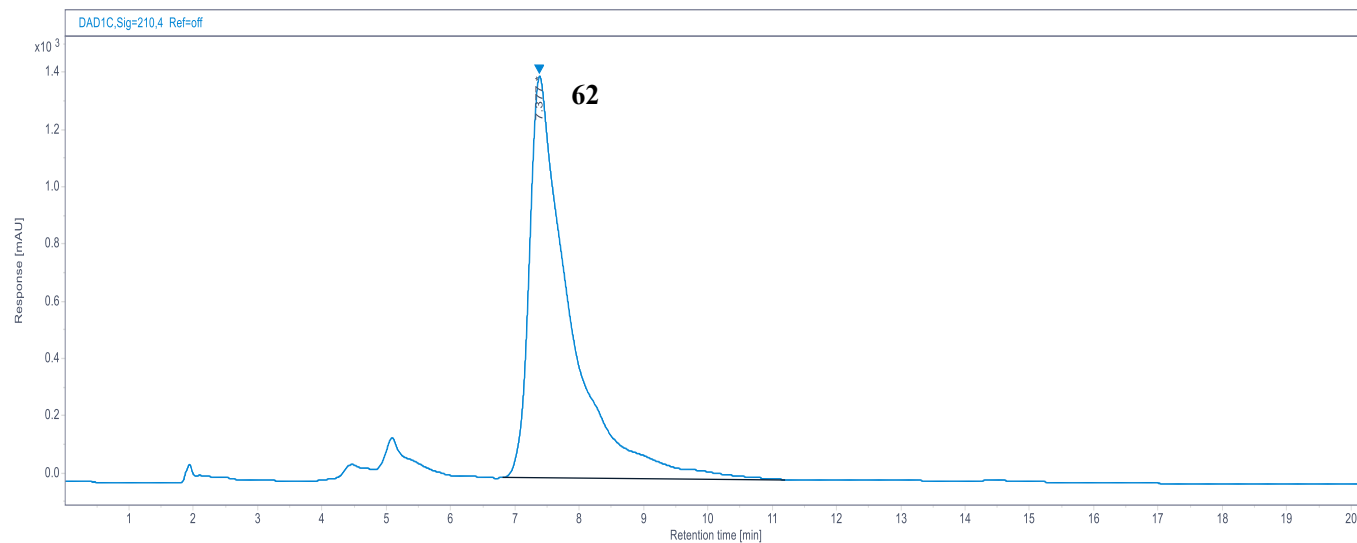

| # | RT (min) | Area (μV·s) | Area%         | Height (μV) | Height% | Start time (min) | Endtime (min) |
|---|----------|-------------|---------------|-------------|---------|------------------|---------------|
| 1 | 2.211    | 158997.212  | 32.129        | 6354.555    | 43.84   | 2.003            | 3.996         |
| 2 | 5.332    | 12777.999   | 2.582         | 490.376     | 3.38    | 4.870            | 6.219         |
| 3 | 7.659    | 323102.926  | <b>65.289</b> | 7648.301    | 52.77   | 6.924            | 10.695        |

**Supplementary Figure 67.** Radio-HPLC analysis of **62-<sup>18</sup>F**.

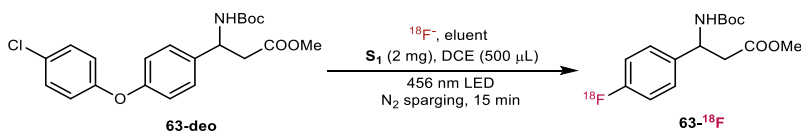

| Substrate     | Product                  | Elution efficiency (EE)         | HPLC analysis conditions | RCC |
|---------------|--------------------------|---------------------------------|--------------------------|-----|
| <b>63-deo</b> | <b>63-<sup>18</sup>F</b> | 26.5 mCi/(26.5 + 2.72) mCi= 91% | 70% MeCN                 | 54% |

**Supplementary Table 72.** Elution efficiency and RCC calculation of **63-<sup>18</sup>F**.

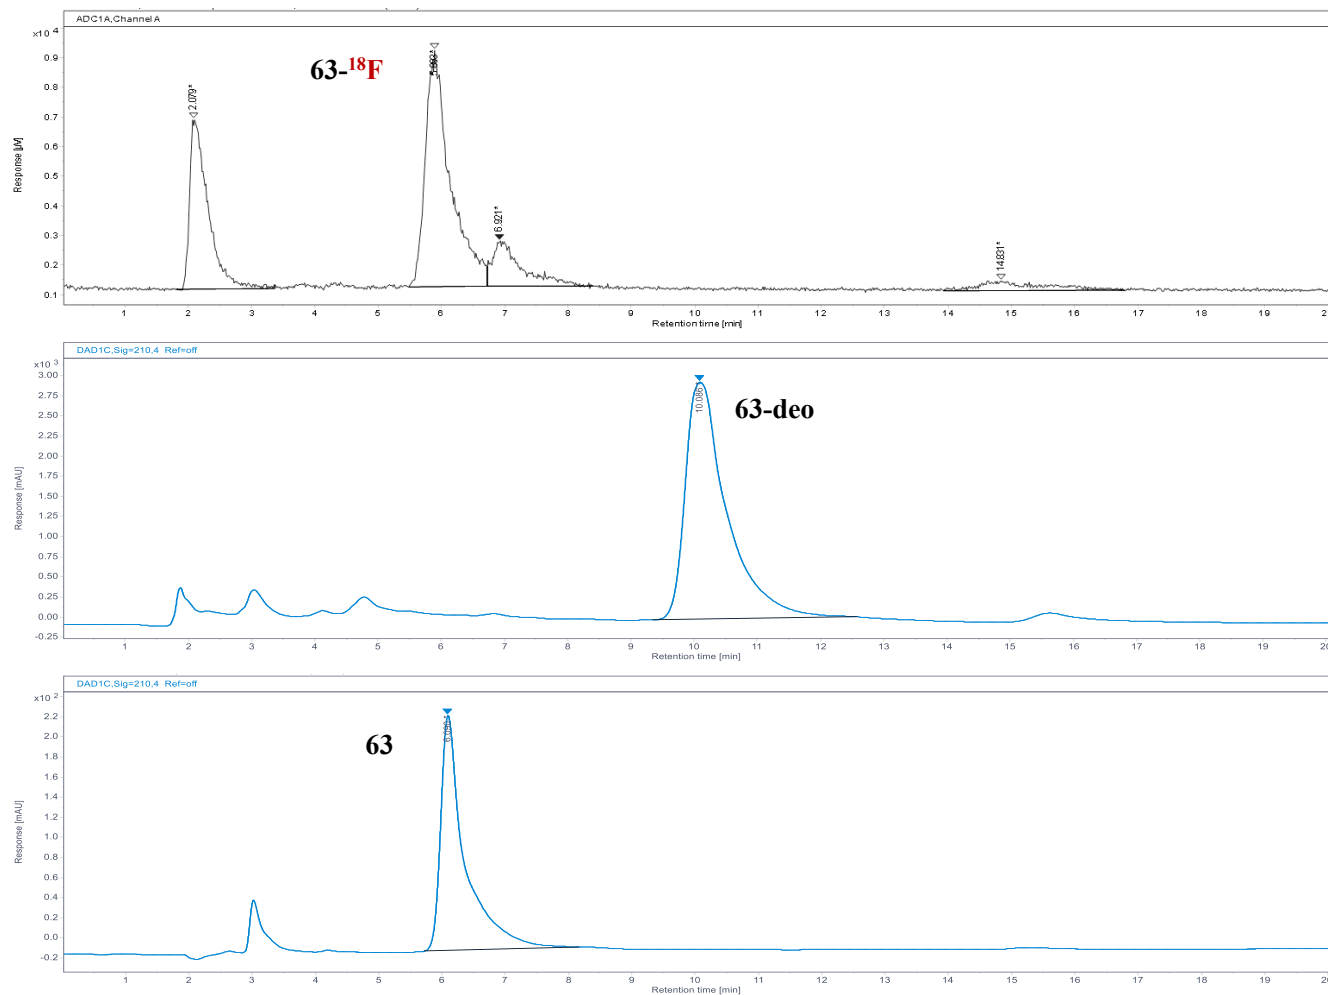

| # | RT (min) | Area (μV·s) | Area%         | Height (μV) | Height% | Start time (min) | End time (min) |
|---|----------|-------------|---------------|-------------|---------|------------------|----------------|
| 1 | 2.079    | 116230.129  | 28.779        | 5732.540    | 36.87   | 1.813            | 3.371          |
| 2 | 5.893    | 217743.183  | <b>53.915</b> | 7974.664    | 51.30   | 5.487            | 6.719          |
| 3 | 6.921    | 48199.504   | 11.935        | 1519.129    | 9.77    | 6.719            | 8.382          |
| 4 | 14.831   | 21692.984   | 5.371         | 319.892     | 2.06    | 13.925           | 16.775         |

**Supplementary Figure 68.** Radio-HPLC analysis of **63-<sup>18</sup>F**.

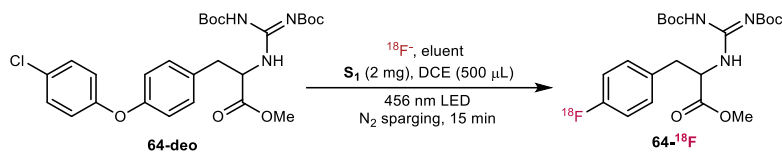

| Substrate | Product             | Elution efficiency (EE)        | HPLC analysis conditions | RCC |
|-----------|---------------------|--------------------------------|--------------------------|-----|
| 64-deo    | 64- <sup>18</sup> F | 7.8 mCi/(7.8 + 0.16) mCi = 98% | 70% MeCN                 | 47% |

**Supplementary Table 73.** Elution efficiency and RCC calculation of 64-<sup>18</sup>F.

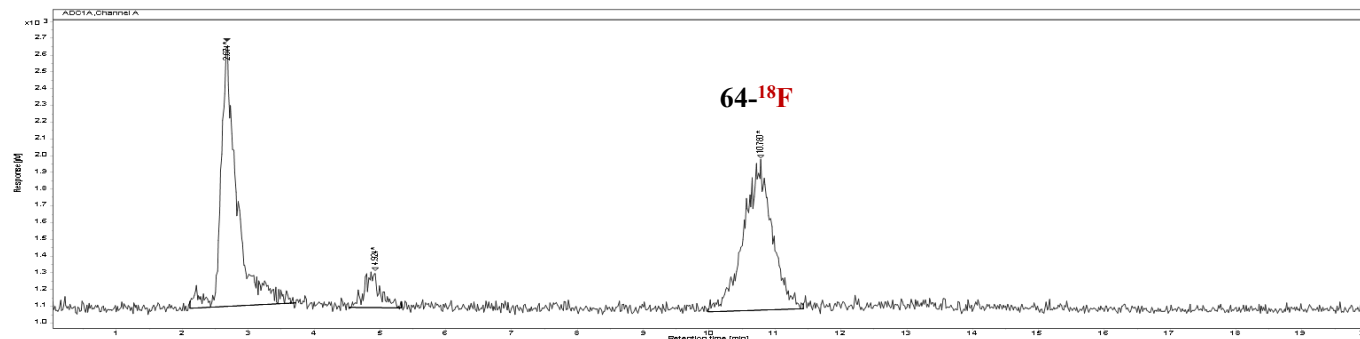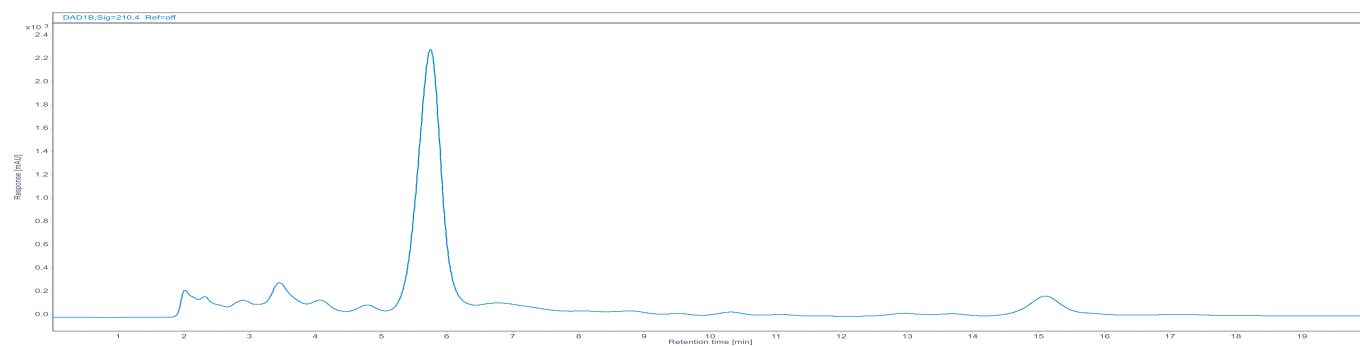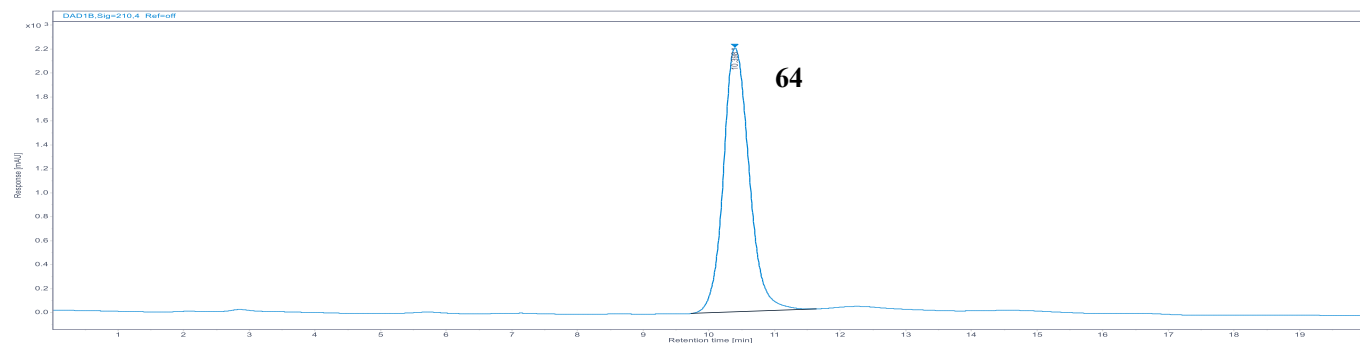

| # | RT (min) | Area (μV·s) | Area%         | Height   | Height% | Start time (min) | End time (min) |
|---|----------|-------------|---------------|----------|---------|------------------|----------------|
| 1 | 2.674    | 26738.286   | 46.775        | 1578.513 | 58.48   | 2.120            | 3.725          |
| 2 | 4.924    | 3564.812    | 6.236         | 215.659  | 7.99    | 4.528            | 5.331          |
| 3 | 10.780   | 26860.535   | <b>46.989</b> | 905.133  | 33.53   | 9.985            | 11.428         |

**Supplementary Figure 69.** Radio-HPLC analysis of 64-<sup>18</sup>F.

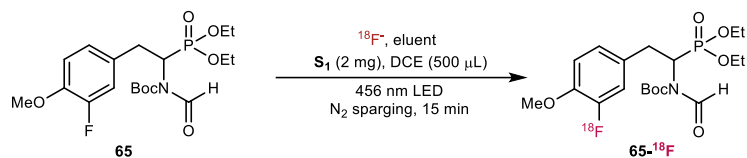

| Substrate | Product                  | Elution efficiency (EE)          | HPLC analysis conditions | RCC |
|-----------|--------------------------|----------------------------------|--------------------------|-----|
| <b>65</b> | <b>65-<sup>18</sup>F</b> | 7.28 mCi/(7.28 + 0.27) mCi = 96% | 60% MeCN                 | 30% |

**Supplementary Table 74.** Elution efficiency and RCC calculation of **65-<sup>18</sup>F**.

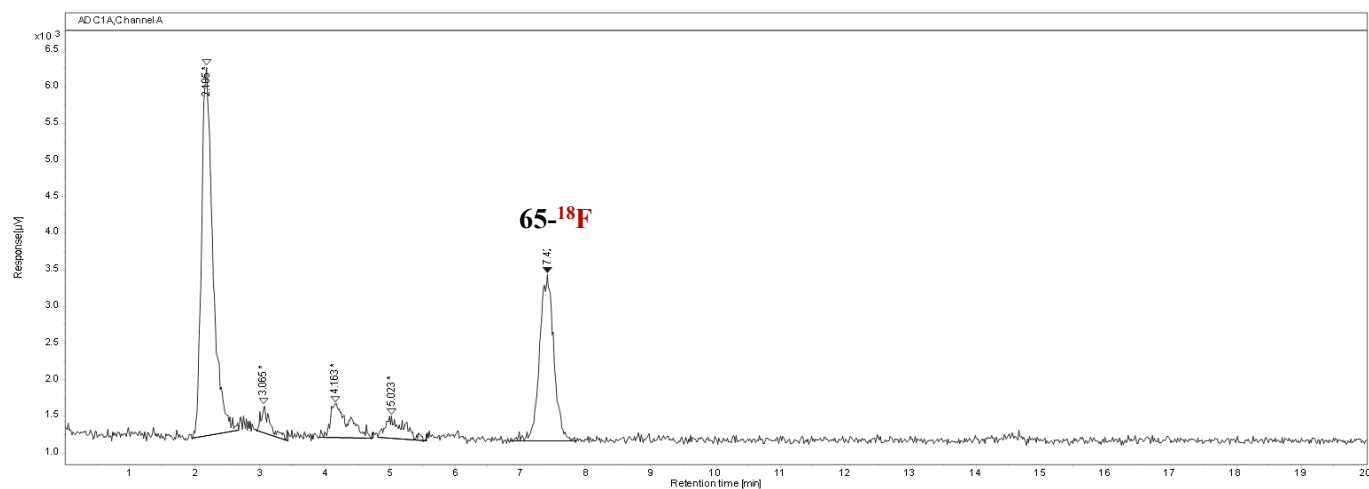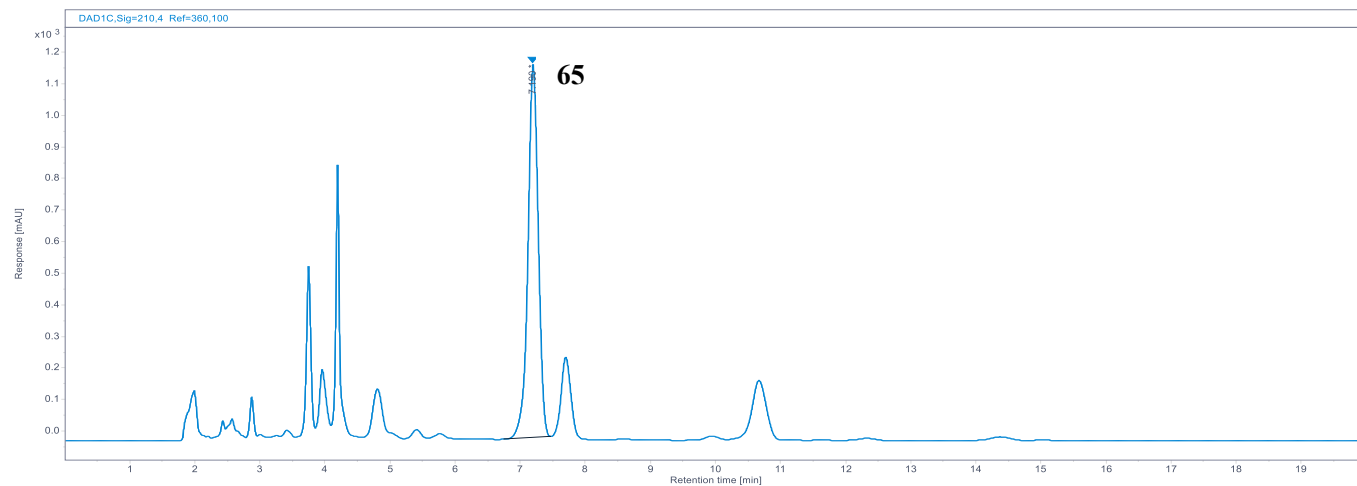

| # | RT (min) | Area (μV·s) | Area%         | Height   | Height% | Start time (min) | End time (min) |
|---|----------|-------------|---------------|----------|---------|------------------|----------------|
| 1 | 2.185    | 61189.261   | 53.483        | 5042.589 | 59.62   | 1.961            | 2.674          |
| 2 | 3.065    | 3708.392    | 3.241         | 376.098  | 4.45    | 2.947            | 3.435          |
| 3 | 4.163    | 9285.793    | 8.116         | 468.783  | 5.54    | 3.905            | 4.736          |
| 4 | 5.023    | 5785.009    | 5.056         | 305.219  | 3.61    | 4.823            | 5.566          |
| 5 | 7.423    | 34440.688   | <b>30.103</b> | 2264.499 | 26.78   | 6.849            | 7.862          |

**Supplementary Figure 70.** Radio-HPLC analysis of **65-<sup>18</sup>F**.

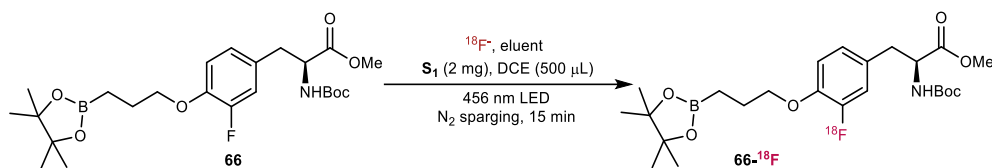

| Substrate | Product                  | Elution efficiency (EE)            | HPLC analysis conditions | RCC              |
|-----------|--------------------------|------------------------------------|--------------------------|------------------|
| <b>66</b> | <b>66-<sup>18</sup>F</b> | 10.71 mCi/(10.71 + 0.47) mCi = 96% | 70% MeCN                 | 18% <sup>a</sup> |

**Supplementary Table 75.** Elution efficiency and RCC calculation of **66-<sup>18</sup>F**. a.0.02 mmol substrate.

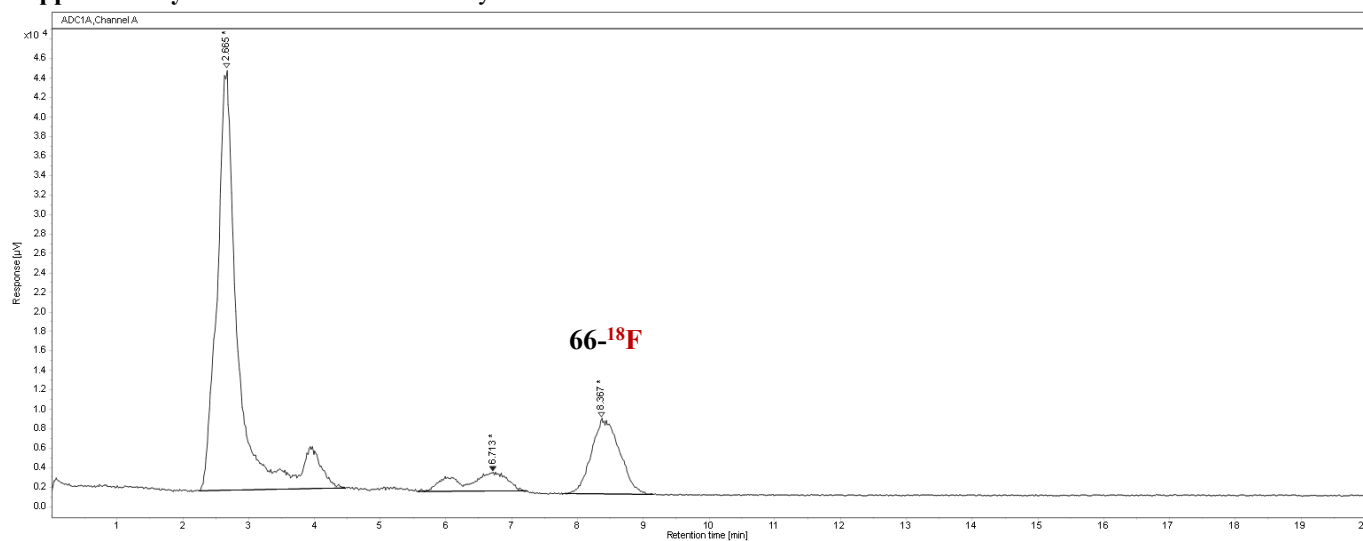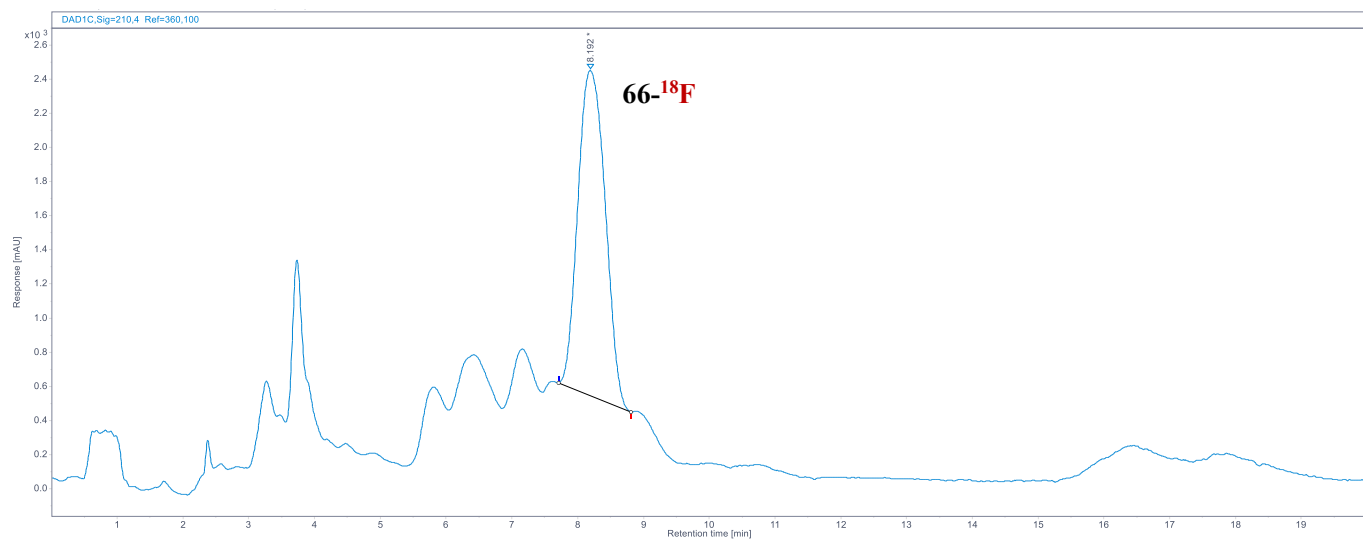

| # | RT (min) | Area (μV·s) | Area%         | Height    | Height% | Start time (min) | End time (min) |
|---|----------|-------------|---------------|-----------|---------|------------------|----------------|
| 1 | 2.665    | 969507.183  | 75.050        | 43263.759 | 81.66   | 2.255            | 4.468          |
| 2 | 6.713    | 93154.711   | 7.211         | 1937.611  | 3.66    | 5.577            | 7.225          |
| 3 | 8.367    | 229153.647  | <b>17.739</b> | 7776.007  | 14.68   | 7.769            | 9.144          |

**Supplementary Figure 71.** Radio-HPLC analysis of **66-<sup>18</sup>F**.



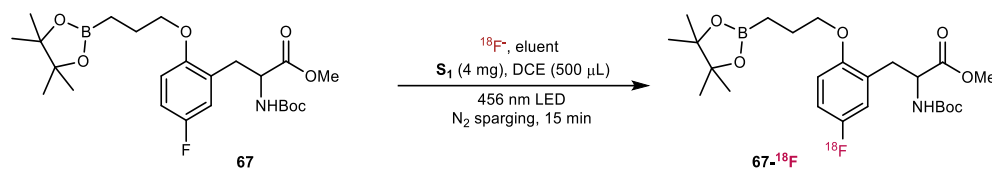

| Substrate | Product                  | Elution efficiency (EE)          | HPLC analysis conditions | RCC |
|-----------|--------------------------|----------------------------------|--------------------------|-----|
| <b>67</b> | <b>67-<sup>18</sup>F</b> | 89.8 mCi/(89.8 + 9.05) mCi = 91% | 70% MeCN                 | 24% |

**Supplementary Table 76.** Elution efficiency and RCC calculation of **67-<sup>18</sup>F**.

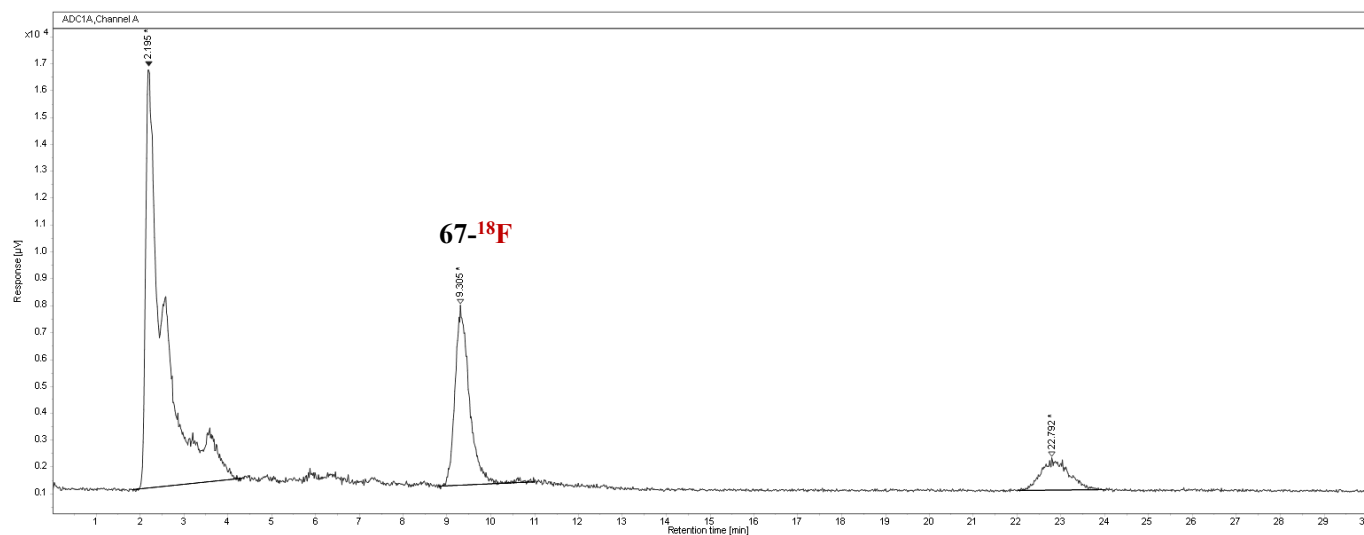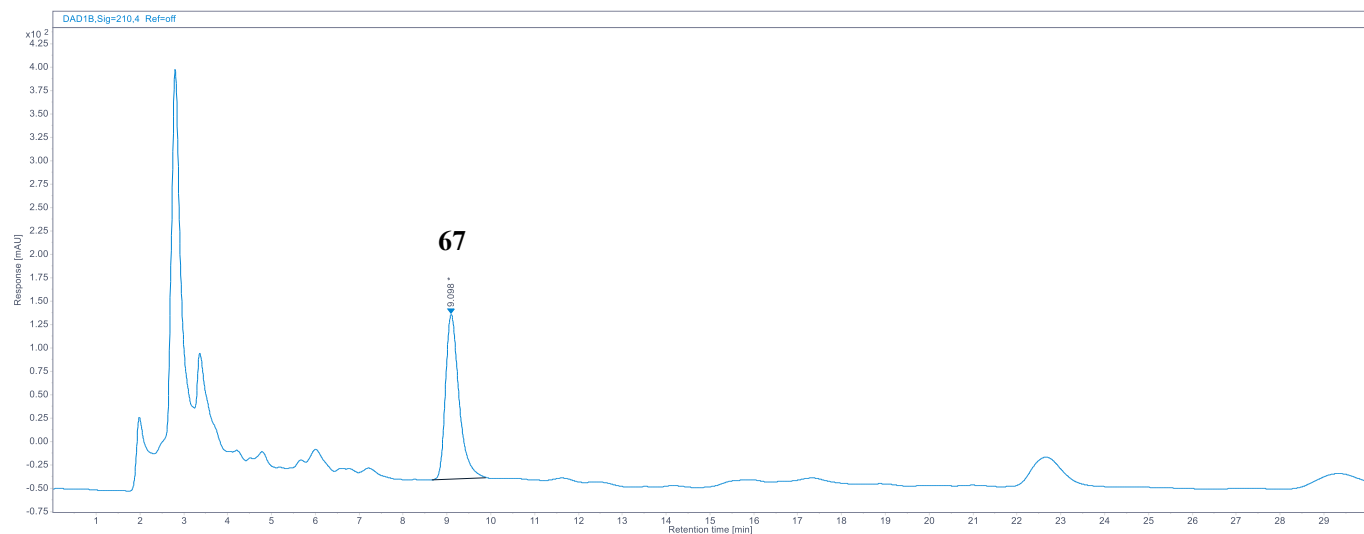

| # | RT (min) | Area (μV·s) | Area%         | Height    | Height% | Start time (min) | End time (min) |
|---|----------|-------------|---------------|-----------|---------|------------------|----------------|
| 1 | 2.195    | 444160.213  | 68.388        | 15649.287 | 66.40   | 1.809            | 4.320          |
| 2 | 9.305    | 155036.219  | <b>23.871</b> | 6710.039  | 28.47   | 8.813            | 10.991         |
| 3 | 22.792   | 50275.040   | 7.741         | 1208.176  | 5.13    | 22.038           | 24.000         |

**Supplementary Figure 72.** Radio-HPLC analysis of **67-<sup>18</sup>F**.

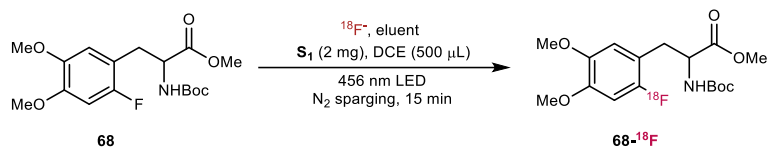

| Substrate | Product                  | Elution efficiency (EE)            | HPLC analysis conditions | RCC   | Average RCC |
|-----------|--------------------------|------------------------------------|--------------------------|-------|-------------|
| <b>68</b> | <b>68-<sup>18</sup>F</b> | 8.32 mCi/(8.32 + 0.67) mCi = 93%   | 60% MeCN                 | 56.8% | 62 ± 7%     |
|           |                          | 8.7 mCi/(8.7 + 0.17) mCi = 98%     |                          | 75.5% |             |
|           |                          | 5.86 mCi/(5.86 + 0.1) mCi = 98%    |                          | 55.9% |             |
|           |                          | 5.26 mCi/(5.26 + 0.17) mCi = 97%   |                          | 57.5% |             |
|           |                          | 15.52 mCi/(15.52 + 0.29) mCi = 98% |                          | 62.7% |             |

**Supplementary Table 77.** Elution efficiency and RCC calculation of **68-<sup>18</sup>F**.

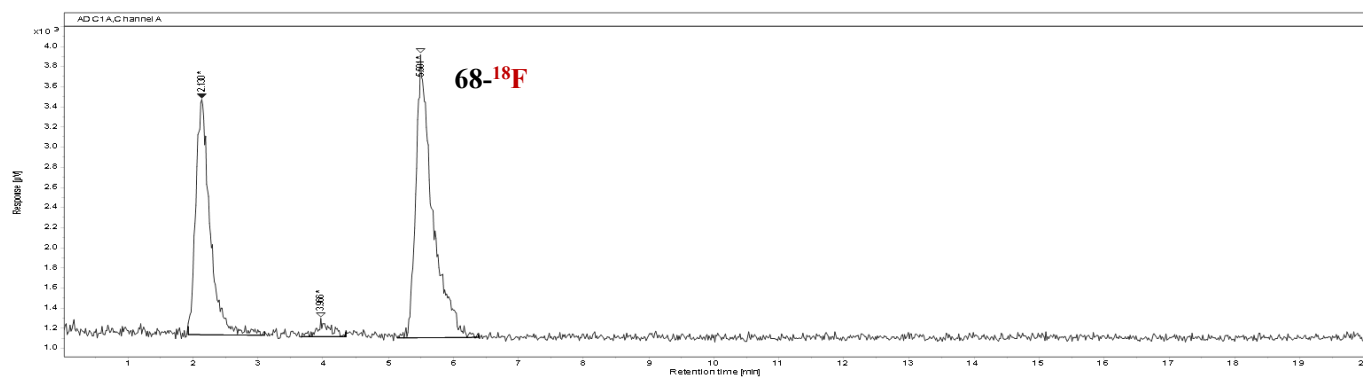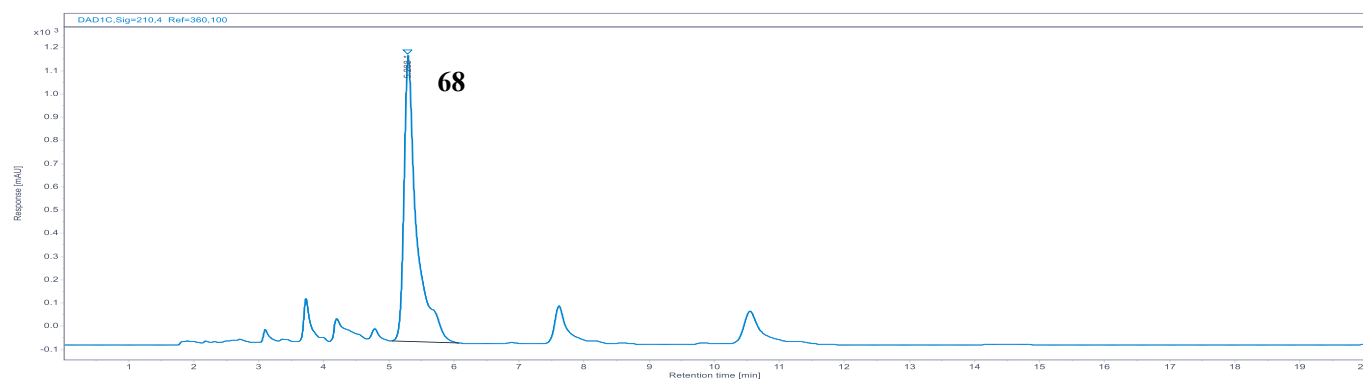

| # | RT (min) | Area (μV·s) | Area%         | Height   | Height% | Start time (min) | End time (min) |
|---|----------|-------------|---------------|----------|---------|------------------|----------------|
| 1 | 2.130    | 35842.656   | 40.539        | 2335.974 | 43.76   | 1.926            | 3.100          |
| 2 | 3.966    | 2348.163    | 2.656         | 182.884  | 3.43    | 3.668            | 4.355          |
| 3 | 5.501    | 50224.684   | <b>56.805</b> | 2818.740 | 52.81   | 5.132            | 6.385          |

**Supplementary Figure 73.** Radio-HPLC analysis of **68-<sup>18</sup>F**.

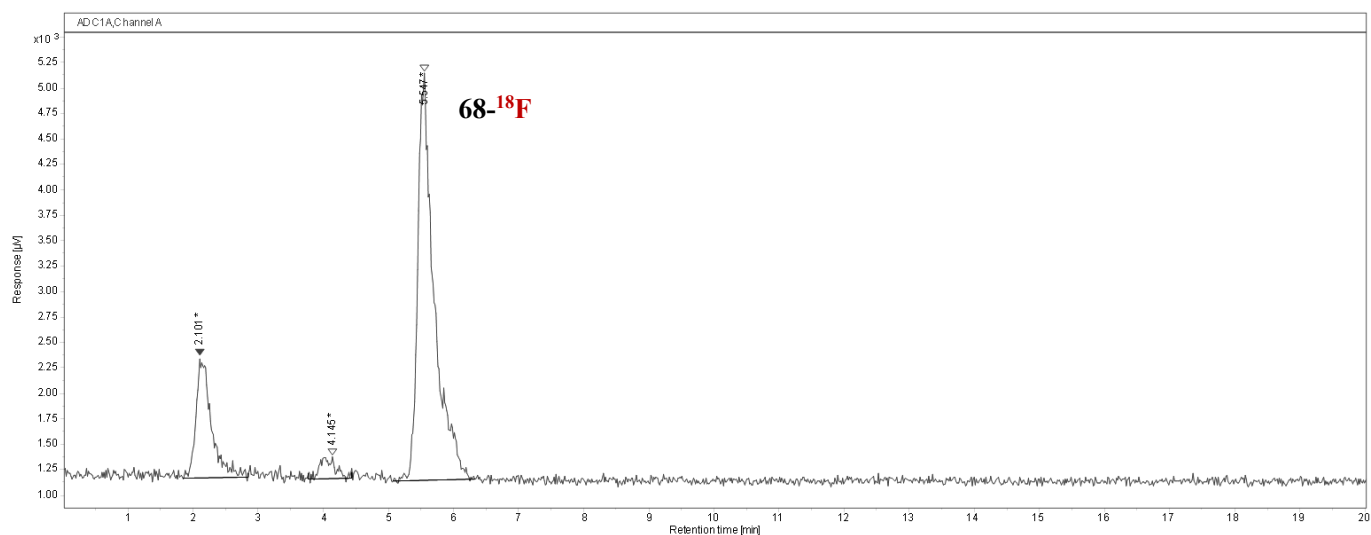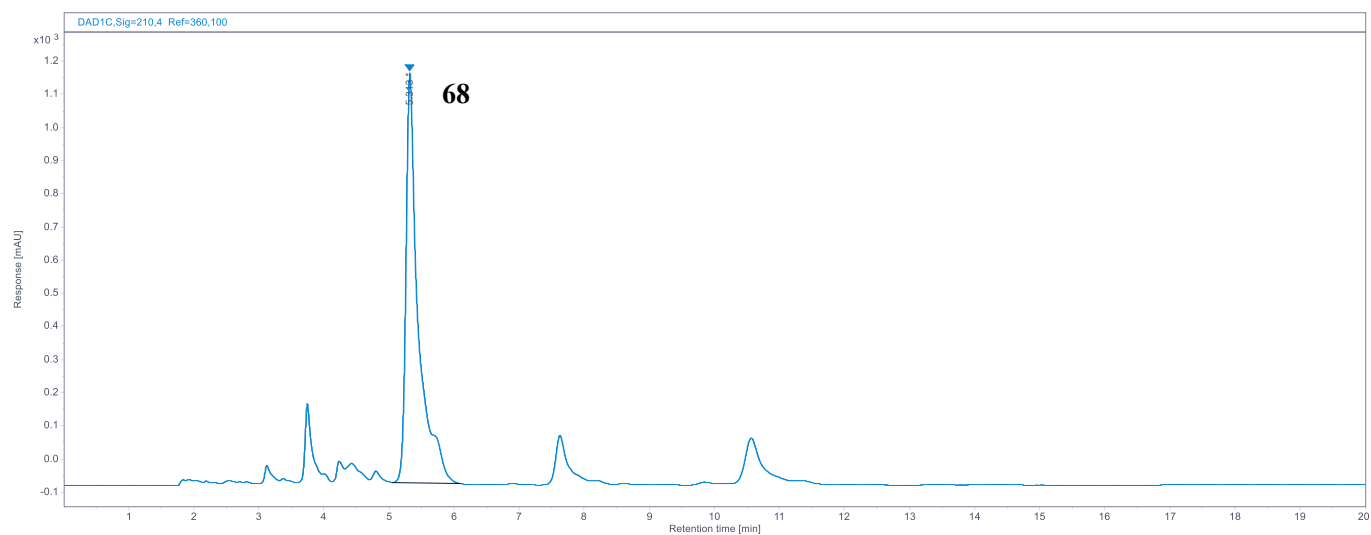

| # | RT (min) | Area (μV·s) | Area%         | Height   | Height% | Start time (min) | End time (min) |
|---|----------|-------------|---------------|----------|---------|------------------|----------------|
| 1 | 2.101    | 19256.078   | 20.720        | 1185.490 | 21.96   | 1.853            | 2.847          |
| 2 | 4.145    | 3529.725    | 3.798         | 214.138  | 3.97    | 3.770            | 4.436          |
| 3 | 5.547    | 70150.740   | <b>75.482</b> | 3998.545 | 74.07   | 5.072            | 6.332          |

**Supplementary Figure 74.** Radio-HPLC analysis of **68-<sup>18</sup>F**.

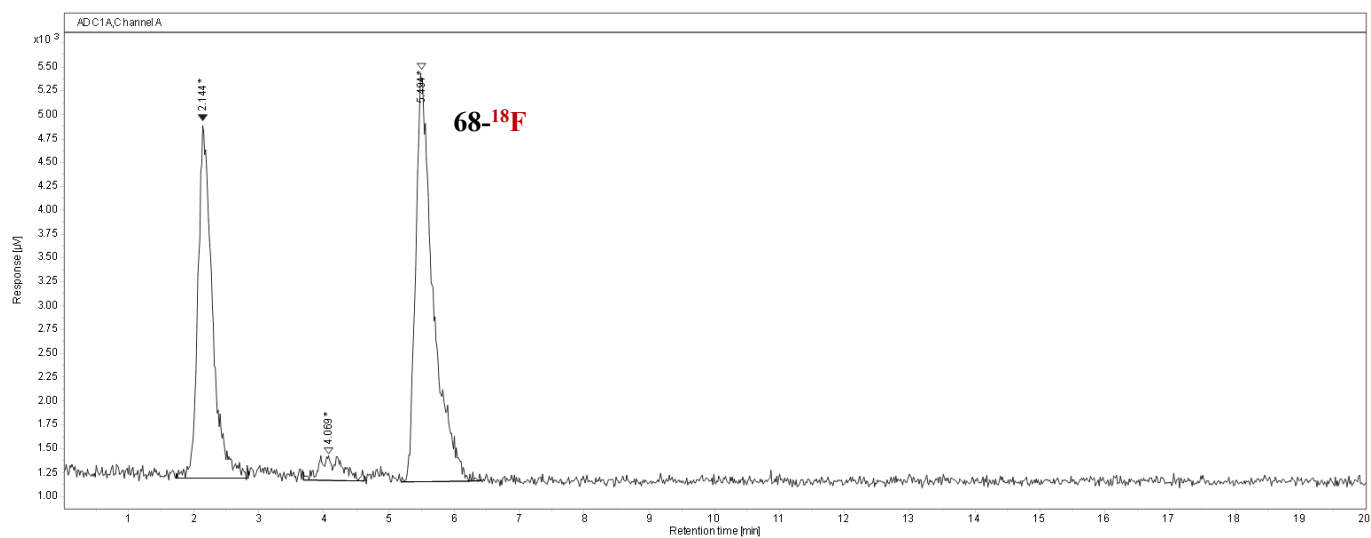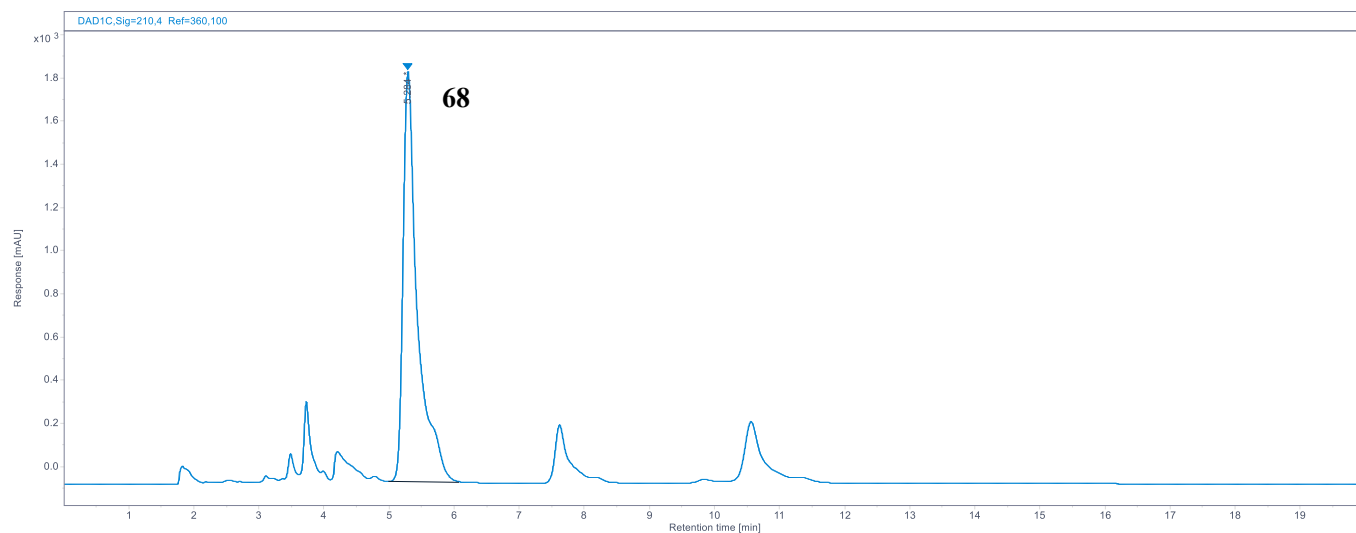

| # | RT (min) | Area (μV·s) | Area%         | Height   | Height% | Start time (min) | End time (min) |
|---|----------|-------------|---------------|----------|---------|------------------|----------------|
| 1 | 2.144    | 57086.011   | 39.453        | 3725.865 | 44.95   | 1.740            | 2.838          |
| 2 | 4.069    | 6754.368    | 4.668         | 263.204  | 3.18    | 3.682            | 4.623          |
| 3 | 5.494    | 80853.596   | <b>55.879</b> | 4300.462 | 51.88   | 5.185            | 6.414          |

**Supplementary Figure 75.** Radio-HPLC analysis of **68-<sup>18</sup>F**.

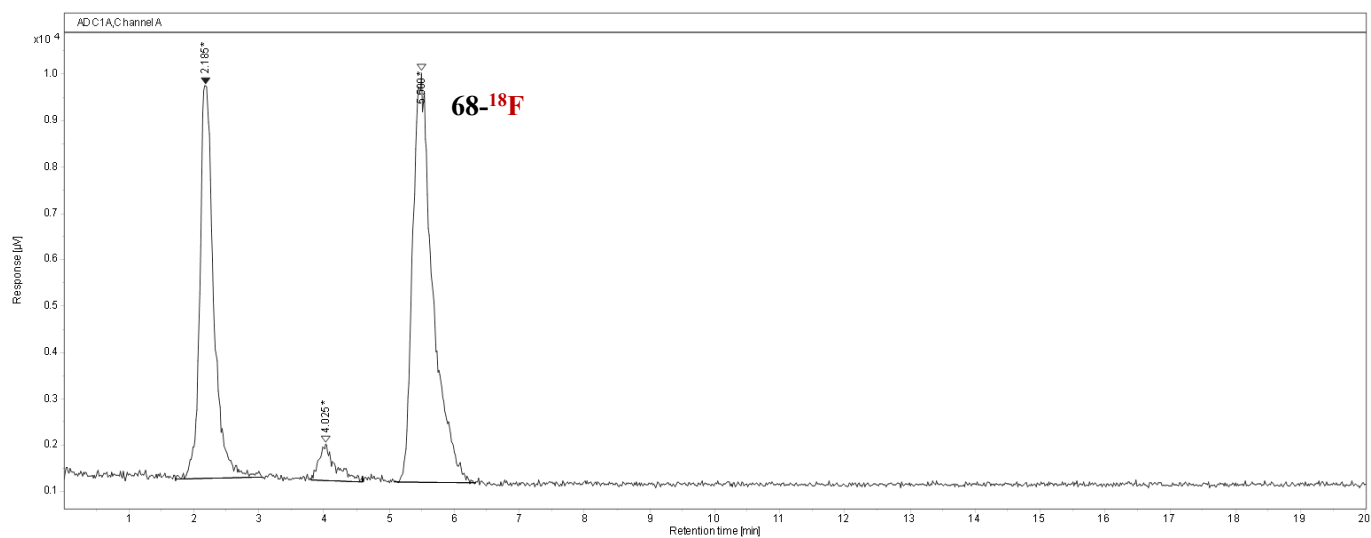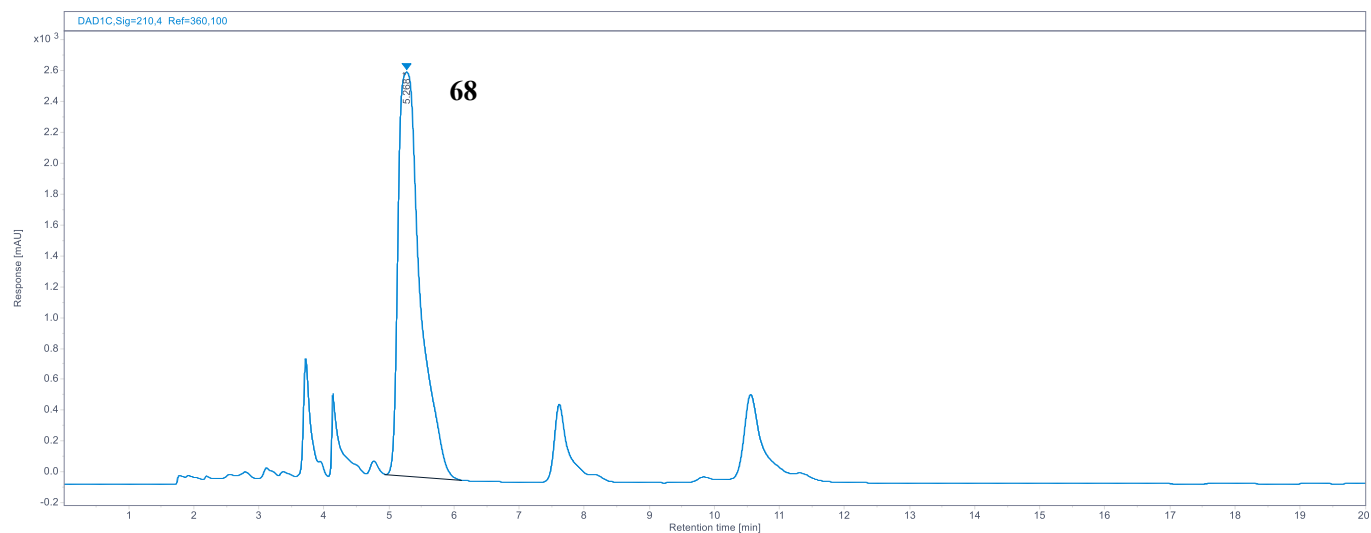

| # | RT (min) | Area (μV·s) | Area%         | Height   | Height% | Start time (min) | End time (min) |
|---|----------|-------------|---------------|----------|---------|------------------|----------------|
| 1 | 2.185    | 126077.217  | 38.321        | 8477.021 | 46.83   | 1.727            | 3.049          |
| 2 | 4.025    | 13779.030   | 4.188         | 785.637  | 4.34    | 3.800            | 4.588          |
| 3 | 5.500    | 189145.662  | <b>57.491</b> | 8839.445 | 48.83   | 5.085            | 6.333          |

**Supplementary Figure 76.** Radio-HPLC analysis of **68-<sup>18</sup>F**.

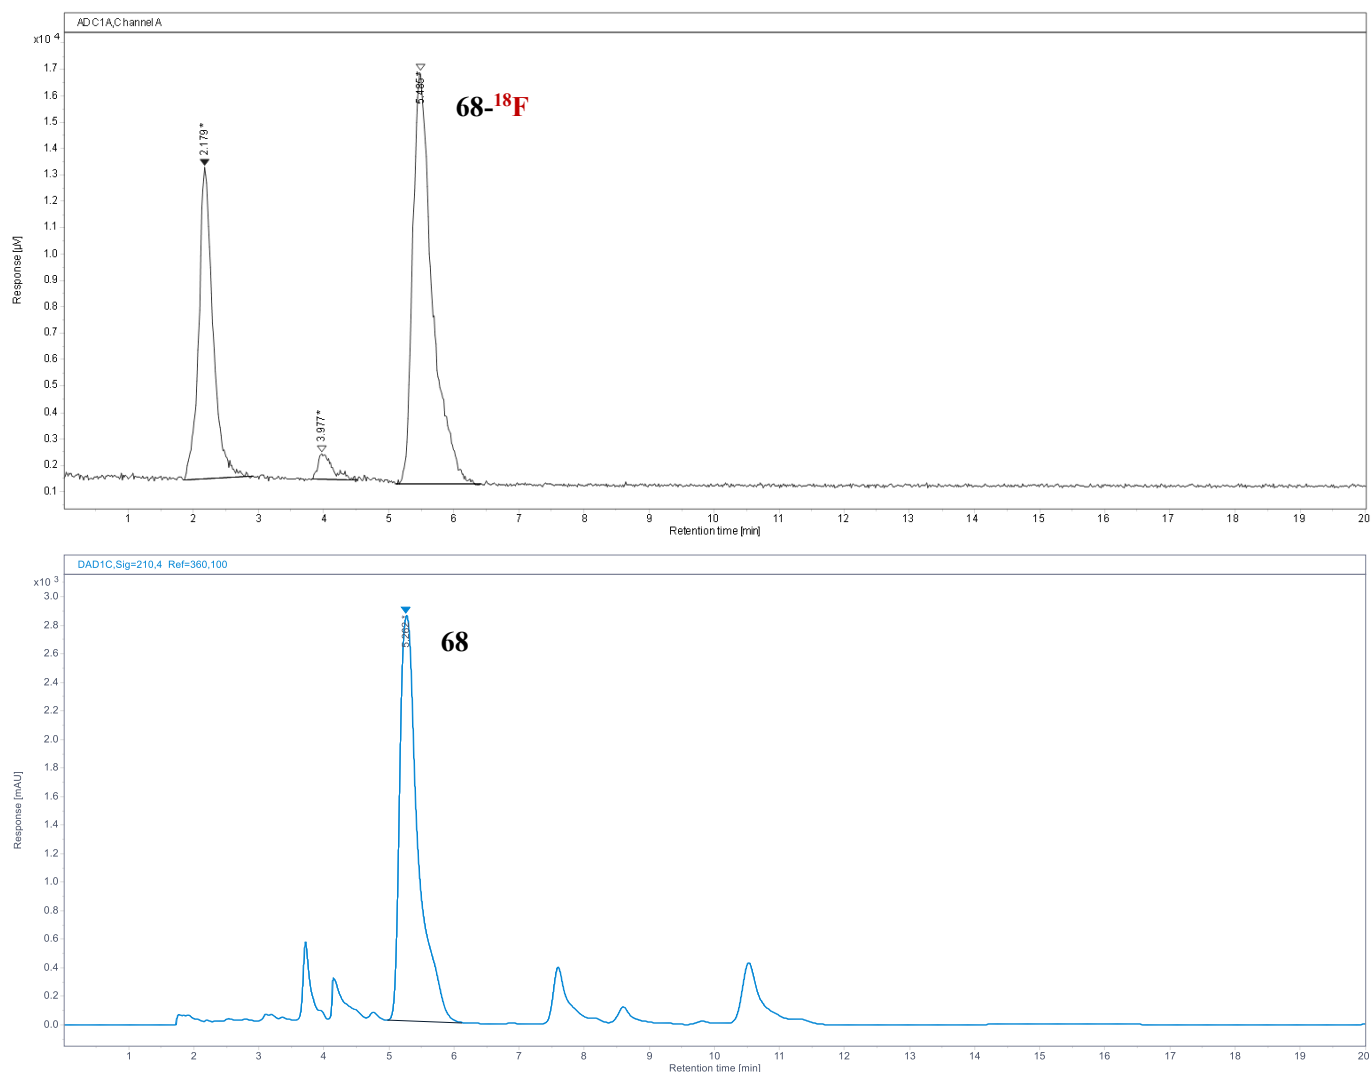

| # | RT (min) | Area ( $\mu\text{V}\cdot\text{s}$ ) | Area%         | Height    | Height% | Start time (min) | End time (min) |
|---|----------|-------------------------------------|---------------|-----------|---------|------------------|----------------|
| 1 | 2.179    | 178994.058                          | 34.346        | 11799.772 | 41.55   | 1.843            | 2.915          |
| 2 | 3.977    | 15449.484                           | 2.965         | 984.130   | 3.47    | 3.820            | 4.516          |
| 3 | 5.485    | 326704.678                          | <b>62.689</b> | 15616.421 | 54.99   | 5.112            | 6.415          |

**Supplementary Figure 77.** Radio-HPLC analysis of  $68\text{-}^{18}\text{F}$ .

### 3.10 Molar activity calculation of $2\text{-}^{18}\text{F}$ from radiodeoxyfluorination of 2-deo

Molar activity was calculated using a standard curve of the corresponding fluorinated 1-(2-bromoethoxy)-4-fluorobenzene (2-F). A  $^{19}\text{F}$  standard curve [Y axis = UV area, X axis = mole number ( $\mu\text{mol}$ )] was created from the HPLC trace from a standard solution of 2-F. The radiolabeled product from the labeling reaction was collected; the UV area overlapping with the radio peak was then recorded. The standard curve was used to calculate mole number. Dividing the product decay corrected activity by the mole number gives the molar activity in  $\text{GBq}/\mu\text{mol}$ . The  $[^{18}\text{F}]$  1-(2-bromoethoxy)-4-fluorobenzene has a molar activity of  $48.47 \text{ GBq}/\mu\text{mol}$ , which is decay corrected to the end of synthesis (EOS).

A

| 1-(2-bromoethoxy)-4-fluorobenzene ( $10^{-4}$ $\mu\text{mol}$ ) | UV area ( $10^4$ ) |
|-----------------------------------------------------------------|--------------------|
| 0                                                               | 0                  |
| 8.92                                                            | 25.8960            |
| 17.83                                                           | 47.3065            |
| 35.66                                                           | 94.0040            |
| 71.33                                                           | 184.6888           |
| 142.66                                                          | 372.3726           |

B

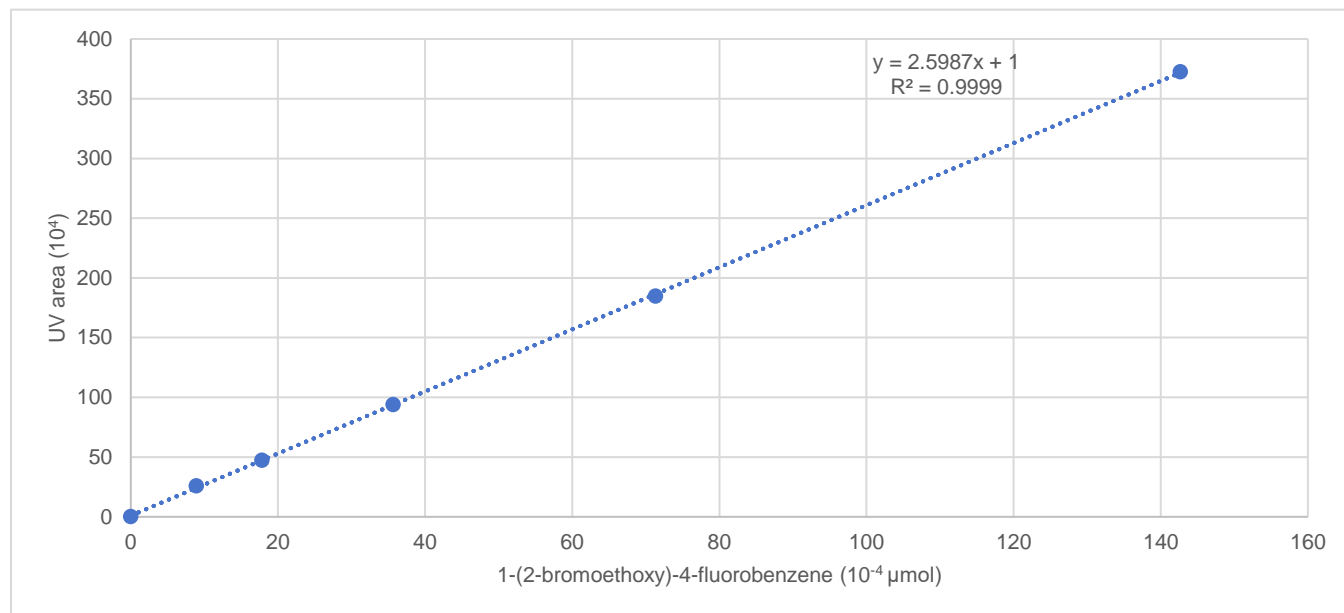

C

| Entry | Decay corrected (EOS) Activity ( $10^{-4}$ GBq) | UV area ( $10^4$ ) | 1-(2-bromoethoxy)-4-fluorobenzene ( $10^{-4}$ $\mu\text{mol}$ ) | Molar activity (GBq/ $\mu\text{mol}$ ) |
|-------|-------------------------------------------------|--------------------|-----------------------------------------------------------------|----------------------------------------|
| 1     | 217.1133                                        | 12.6408            | 4.4795                                                          | 46.4682                                |

**Supplementary Figure 78.** Standard curve data for 2-F(A and B) ; C. the molar activity for 2- $^{18}\text{F}$  calculated from parts A and B.

### 3.10 Scale-up $^{18}\text{F}$ -labelling of racemic FDOPA precursor **68** on a LED reactor

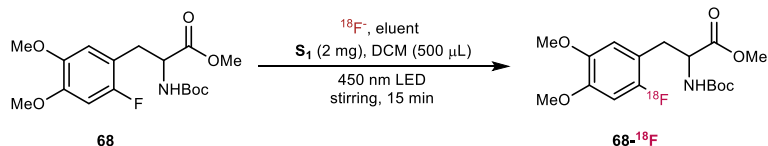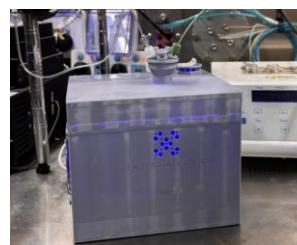

Following the general procedure at section 3.8, with the standard eluent, the  $^{18}\text{F}^-$  trapped on the anion exchange resin was eluted in a sealed reaction tube, which were preloaded with photocatalyst  $\text{S}_1$  (2 mg), substrate **68** (3.6 mg, 0.01 mmol) and DCE or DCM (500  $\mu\text{l}$ ) on the ProBox reactor (450 nm) as shown above. The solution was stirred under LED light irradiation for 15 min and then analyzed on the HPLC to calculate RCCs.

| Substrate | Product             | Solvent | Elution efficiency (EE)             | HPLC analysis conditions | RCC |
|-----------|---------------------|---------|-------------------------------------|--------------------------|-----|
| 68        | 68- <sup>18</sup> F | DCE     | 102.2 mCi/(102.2 + 2.01) mCi = 98%  | 55% MeCN<br>(Column B)   | 61% |
|           |                     | DCM     | 203.96 mCi/(203.96 + 6.6) mCi = 97% |                          | 70% |

**Supplementary Table 78.** Elution efficiency and RCC calculation of scale-up synthesis of 68-<sup>18</sup>F on the LED reactor.

**DCE as the solvent:**

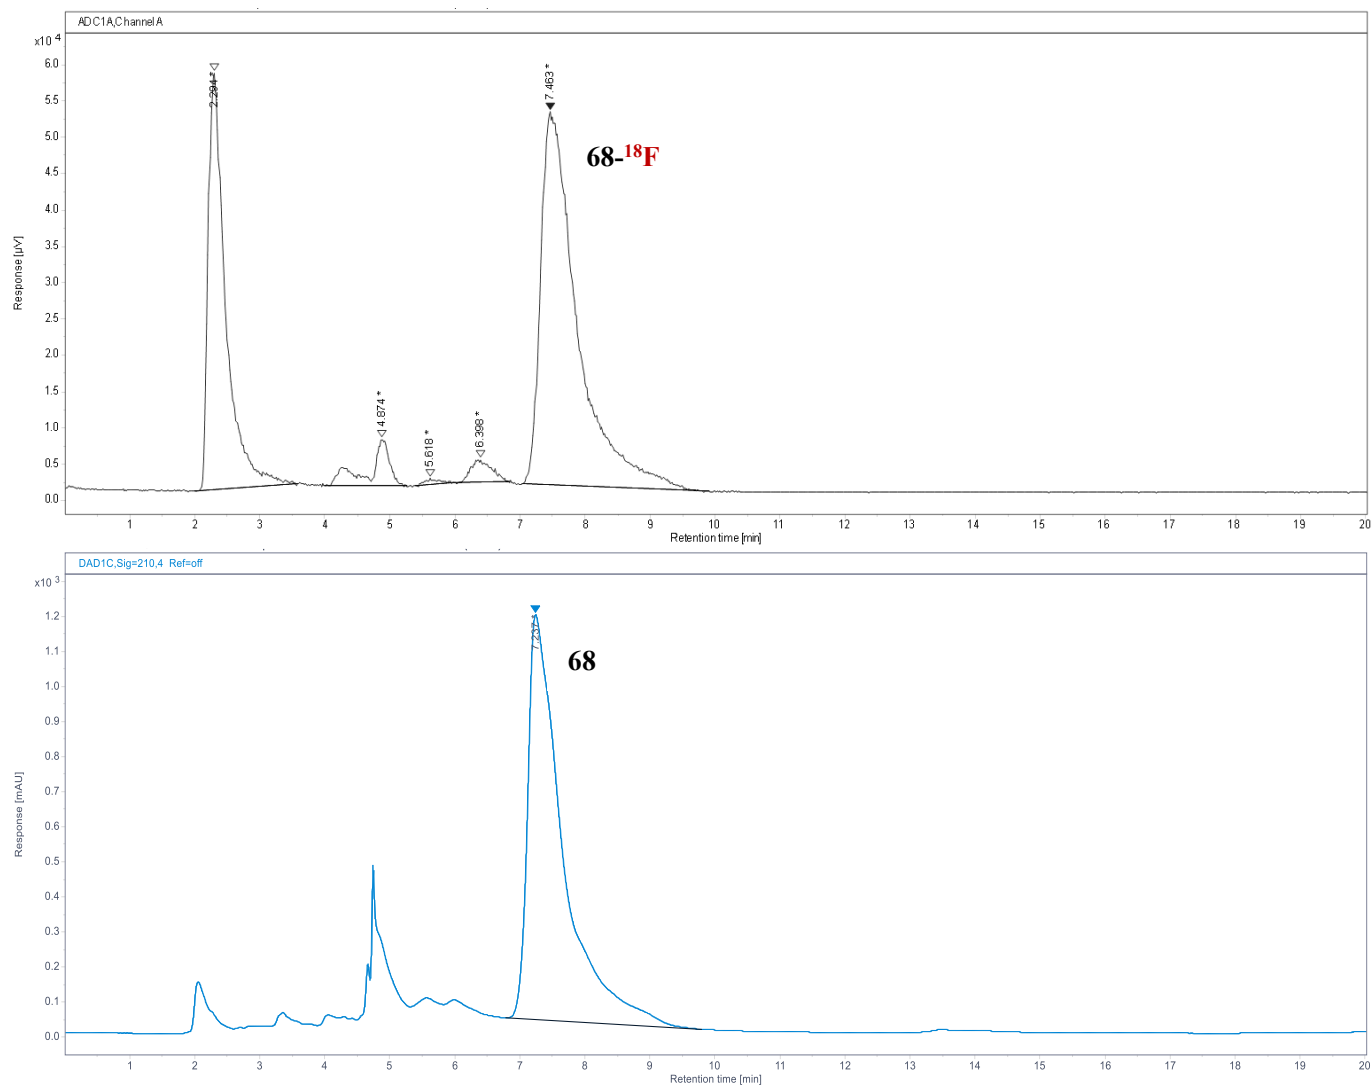

| # | RT (min) | Area (μV·s) | Area%         | Height (μV) | Height% | Start time (min) | End time (min) |
|---|----------|-------------|---------------|-------------|---------|------------------|----------------|
| 1 | 2.294    | 1078443.080 | 32.543        | 57524.032   | 48.19   | 2.008            | 3.580          |
| 2 | 4.874    | 144167.431  | 4.350         | 6471.485    | 5.42    | 3.995            | 5.255          |
| 3 | 5.618    | 11272.914   | 0.340         | 814.266     | 0.68    | 5.399            | 5.982          |
| 4 | 6.398    | 69503.530   | 2.097         | 3122.481    | 2.62    | 5.982            | 6.842          |
| 5 | 7.463    | 2010533.946 | <b>60.669</b> | 51438.764   | 43.09   | 7.034            | 9.910.         |

**Supplementary Figure 79.** Radio-HPLC analysis of 68-<sup>18</sup>F.



### DCM as the solvent:

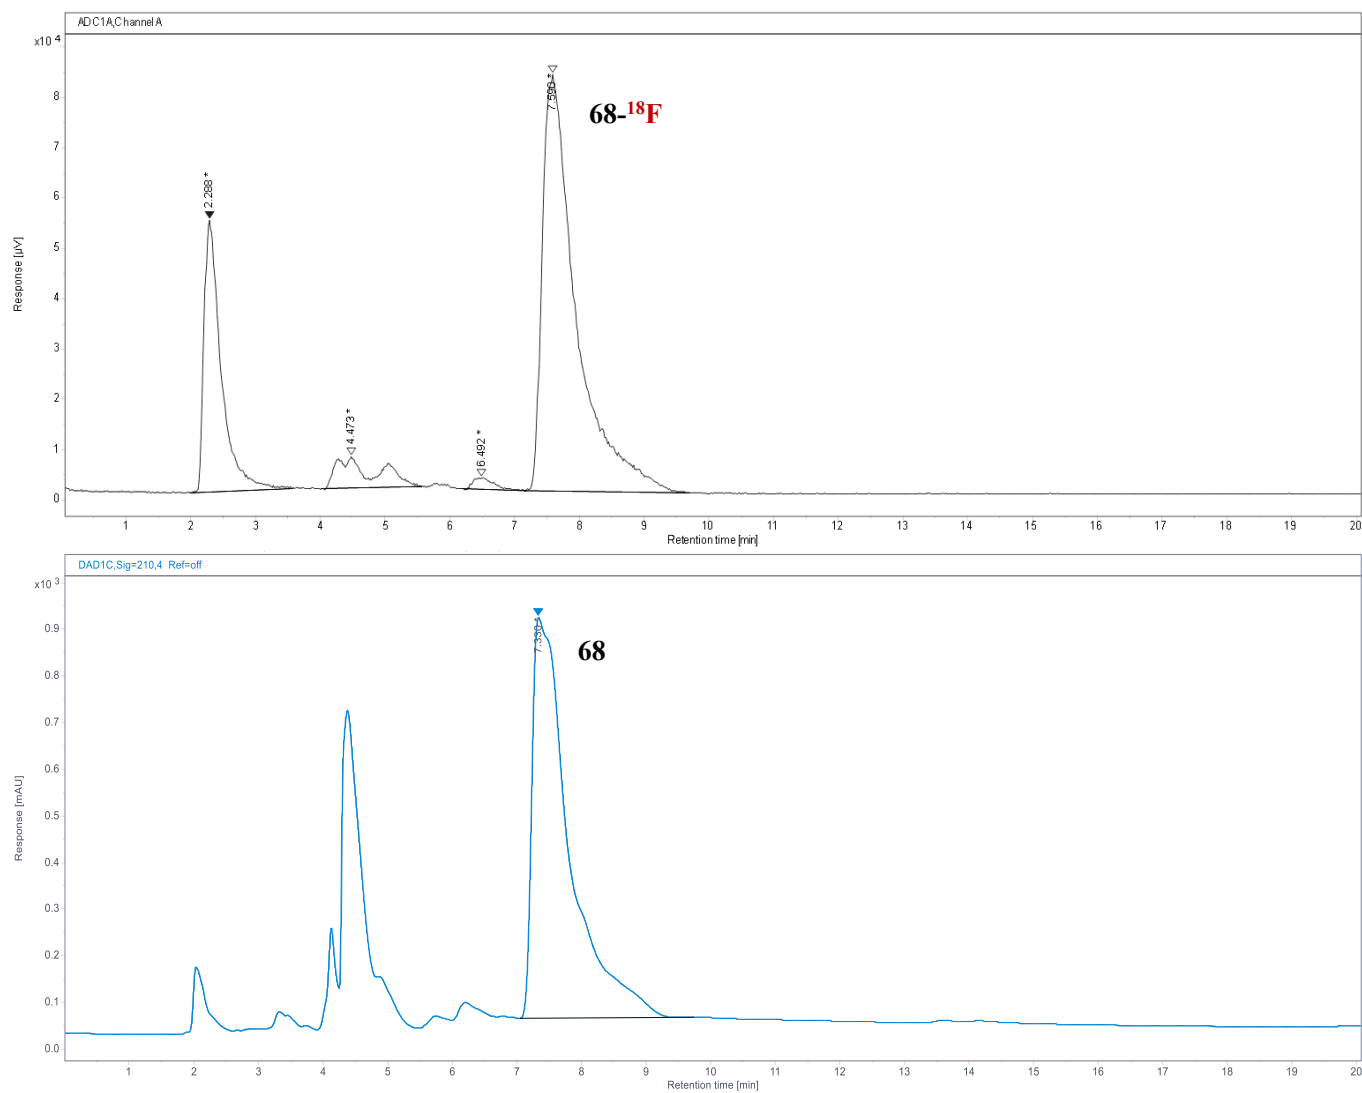

| # | RT (min) | Area (μV·s) | Area%         | Height (μV) | Height% | Start time (min) | End time (min) |
|---|----------|-------------|---------------|-------------|---------|------------------|----------------|
| 1 | 2.288    | 992391.774  | 23.168        | 54012.137   | 37.18   | 1.995            | 3.568          |
| 2 | 4.473    | 256948.908  | 5.999         | 6229.063    | 4.29    | 4.013            | 5.571          |
| 3 | 6.492    | 51507.445   | 1.202         | 2352.515    | 1.62    | 6.179            | 7.173          |
| 4 | 7.590    | 2982555.425 | <b>69.631</b> | 82694.387   | 56.92   | 7.173            | 9.695          |

**Supplementary Figure 80.** Radio-HPLC analysis of **68-<sup>18</sup>F**.

### 3.11 Automatic synthesis of [<sup>18</sup>F]FDOPA

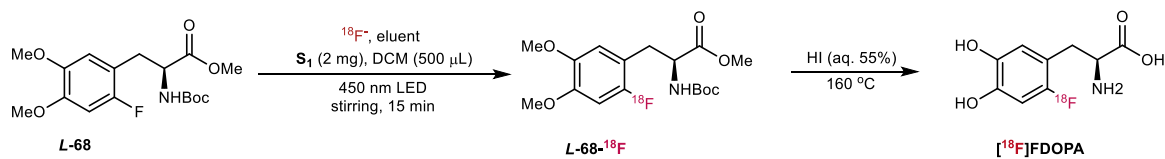

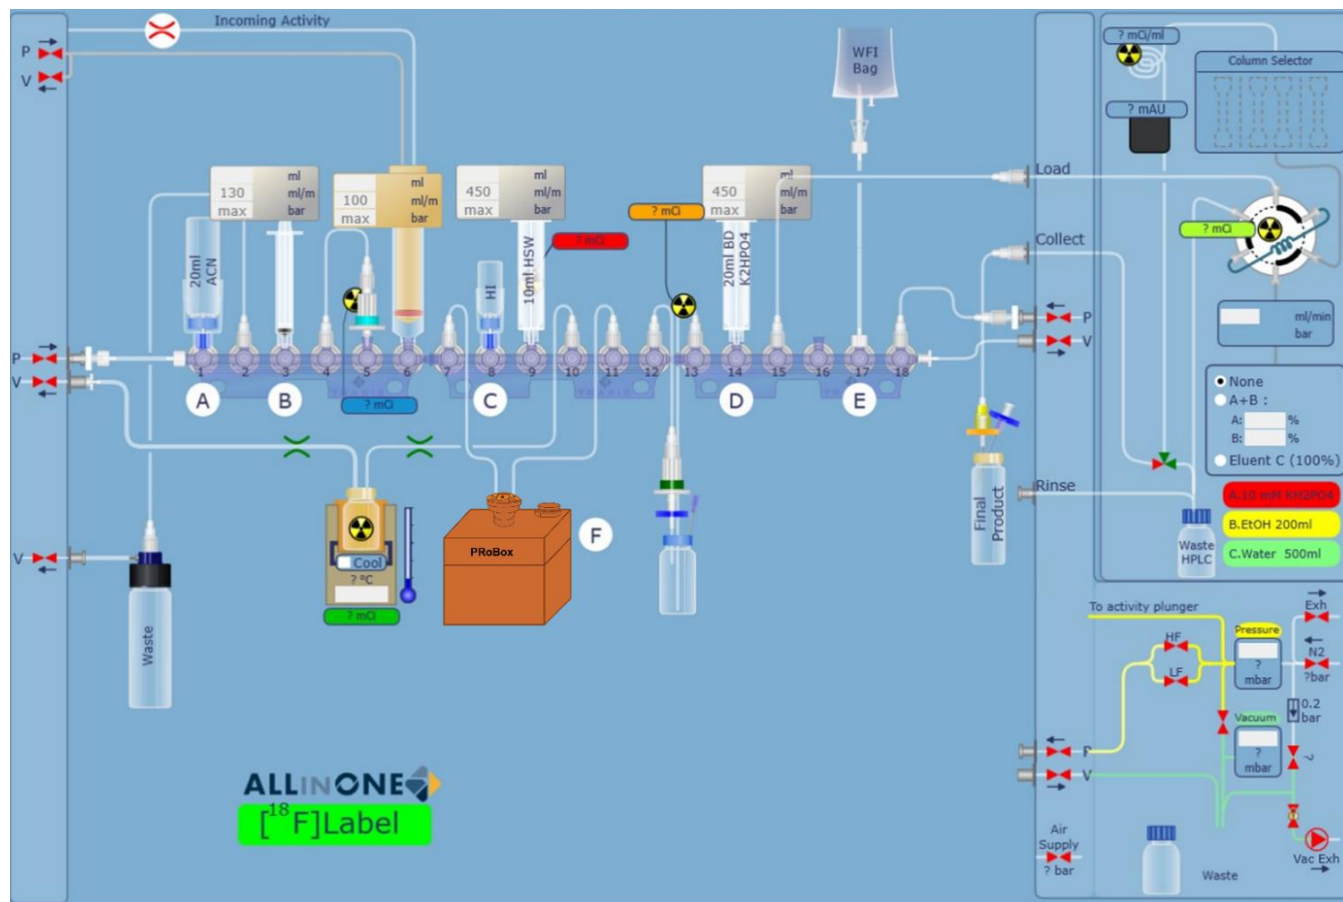

**Supplementary Figure 81.** Automation synthesis schematic diagram on a AllinOne radiosynthesis module

| Position    | Item                                           | Composition                                        | Qty    | Container              |
|-------------|------------------------------------------------|----------------------------------------------------|--------|------------------------|
| 1 (Site A)  | Acetonitrile                                   | Anhydrous acetonitrile                             | 12 mL  | 20 mL clear glass vial |
| 3 (Site B)  | Eluent                                         | <sup>1</sup> BuOH                                  | 400 µL | 3 mL BD syringe        |
|             |                                                | Acetonitrile                                       | 100 µL |                        |
|             |                                                | TBAP (0.1 mg/µL) of MeCN solution                  | 30 µL  |                        |
| 5           | anion-exchange resin (KT-101)                  | —                                                  | 1      | NA                     |
| 7 (Site F)  | Empty reaction tube                            | photocatalyst <b>S1</b> (2 mg)                     | 2 mg   | ProBox                 |
|             |                                                | substrate <b>L-68</b>                              | 3.6 mg |                        |
|             |                                                | DCM                                                | 500 µL |                        |
| 8 (Site C)  | HI                                             | HI (55 wt.% in H <sub>2</sub> O)                   | 1 mL   | 4 mL clear glass vial  |
| 12          | Sep-Pak Plus Long Alumina N Cartridges-1710 mg | Al <sub>2</sub> O <sub>3</sub>                     | 1      | NA                     |
| 14 (Site D) | K <sub>2</sub> HPO <sub>4</sub> solution       | K <sub>2</sub> HPO <sub>4</sub> solution (3 mol/L) | 3 mL   | 20 mL BD syringe       |
| 17 (Site E) | Bag of sterile injection water                 | Sterile injection water                            | 500 mL | NA                     |

**Supplementary Table 79.** Details of composition in each site for  $^{18}\text{F}$ -FDOPA synthesis on an AllinOne radiosynthesis module collecting an LED reactor (ProBox)

A schematic diagram of the AllinOne radiosynthesis module used to synthesize [ $^{18}\text{F}$ ]FDOPA was shown in **Supplementary Figure 81**, and the details of composition in each site were listed in **Supplementary Table 79**. The automatic synthesis procedure was as follows:

**Step 1:** The aqueous  $^{18}\text{F}^-$  solution produced by the cyclotron was delivered to the activity reservoir on position 6 (P6) of the AllinOne synthesis module and trapped through an anion-exchange resin (KT-101, P5) preconditioned with 10 mL  $\text{K}_2\text{HPO}_4$  (1 M) and 10 mL water. (P6-P5-P4-P2-Waste)

**Step 2:** The resin and lines were flushed under  $\text{N}_2$  flow for 60 seconds to remove most of the water, then washed with 5 mL MeCN and flushed with  $\text{N}_2$  for another 3 min. (P1-P9-P5-P4-P2-Waste)

**Step 3:** The prepared eluent was withdrawn from the 3 mL BD syringe (P3, Site B), and then was slowly (0.5 mL/min, 3 min) passed through the resin toward a sealed reaction tube, which was preloaded with photocatalyst **S1** (2 mg), substrate **L-68** (3.6 mg, 0.01 mmol) which was readily obtained from chiral HPLC resolution (Column: CHIRALPAK AY-3, 4.6\*100 mm; Solvents: MeOH/MeCN, **Supplementary Figure 82**) and DCM (500  $\mu\text{L}$ ) on the ProBox reactor (450 nm). The solution was stirred under LED light irradiation for 15 min. (P3-P4-P5-P7-ProBox reactor)

**Step 4:** At the end of the 15-minute reaction, the solution in the ProBox reactor was transferred into the vial located on a heater by gas pressure. Rinse the reaction tube with another 2 mL MeCN which was then transferred to the same vial. (P7-P10-heated reactor; P9-P7; P7-P10-heated reactor)

**Step 5:** The crude reaction solution containing the  $^{18}\text{F}$ -labeled **L-68** was evaporated under vacuum and nitrogen flow using a gradient of temperature 110  $^\circ\text{C}$  for 5 min. The reactor was then actively cooled to 50  $^\circ\text{C}$  using a compressed air flow.

**Step 6:** 1 mL HI (55 wt.% in  $\text{H}_2\text{O}$ ) at P8 (Site C) was then added into the vial in the heated reactor, followed by a sealed reaction at 160  $^\circ\text{C}$  for 15 min. The reactor was cooled to 50  $^\circ\text{C}$  before the reaction mixture was neutralized through the 3 mL  $\text{K}_2\text{HPO}_4$  solution (3 M) at P14 (Site D). (P14-P10)

**Step 7:** The crude reaction mixture (4 mL) was passed through the Alumina N cartridge (P12) pretreated with 30 mL water and a sterile nylon syringe filter to remove unreacted [ $^{18}\text{F}$ ]F $^-$  and insoluble catalyst residue before loading to HPLC. (P10-P9-P12)

**Step 8:** Additionally, the reactor vial was subsequently rinsed with another 3 mL of water (P17, Site E) using the 10 mL HSW Syringe (P9), repeating step 7 to transfer the potentially remaining crude reaction mixture thoroughly. Finally, a total of 7 mL of sample was collected in the intermediate transfer vial and then loaded on the loop circle using a 20 mL BD Syringe (P14). (P17-P9-P10-P9-P12; P13-P14-P15)

**Step 9:** The [ $^{18}\text{F}$ ]FDOPA isolated from HPLC was collected by switching the collection valve to the empty final product vial (**Supplementary Figure 83**). HPLC conditions: Phenomenex, Kinetex $^\circ$  4  $\mu\text{m}$  Synergi 80  $\text{\AA}$ , 250 x 10.00 mm LC Column. Mobile phase: 10 mM  $\text{KH}_2\text{PO}_4$ . Flow rate: 4 mL/min.

The [ $^{18}\text{F}$ ]FDOPA was successfully synthesized and isolated in 14.8% RCY (non-decay corrected) in 84 min with 99% ee on the commercial radiosynthesis module (AllinOne 4530) collecting with an LED reactor. The synthesis data was summarized in the **Supplementary Table 80**. The isolated product and the absolute configuration were confirmed by comparison with the racemic FDOPA and the clinically produced FDOPA from a commercial  $^{18}\text{F}$ -FDOPA cassette for AllinOne (**Supplementary Figure 84**). HPLC conditions: Astec CHIROBIOTICR T Chiral HPLC Column, 5  $\mu\text{m}$  particle size, 250 mm x 4.6 mm, SUPELCO. Mobile phase: 0.2 mL formic acid in 700 mL MeOH and 300 mL water. Flow rate: 1 mL/min

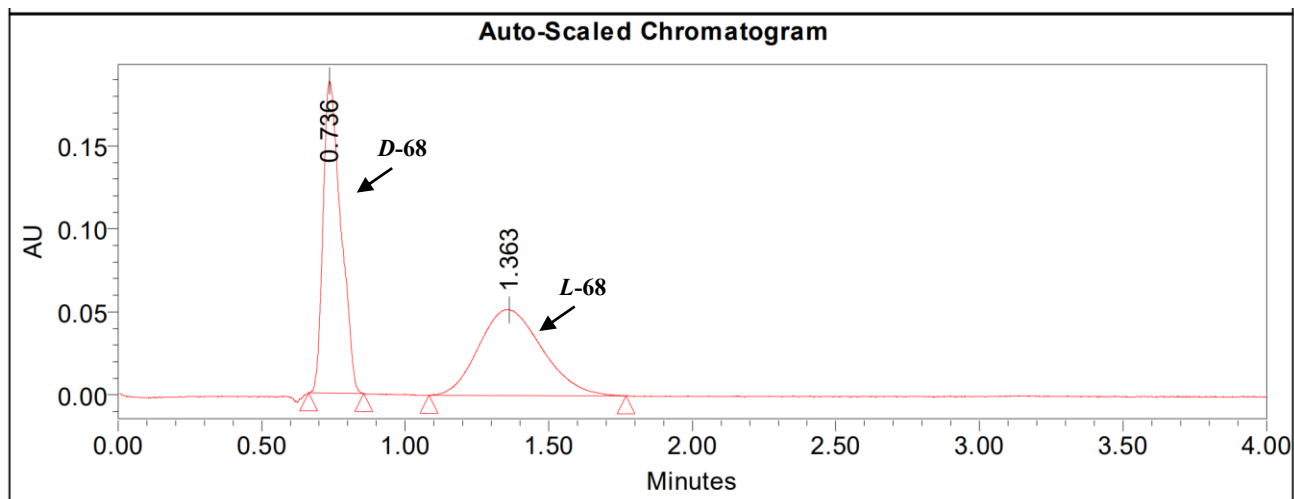

**Supplementary Figure 82.** Chiral HPLC resolution of **68** to provide the *L*-**68**

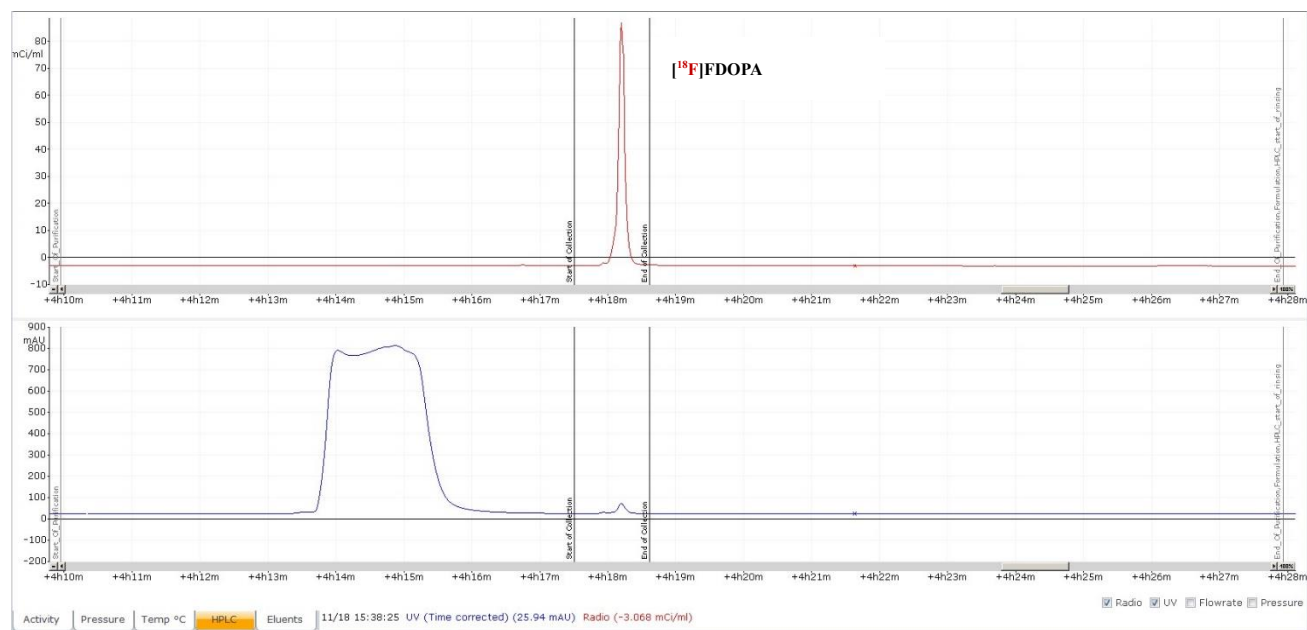

**Supplementary Figure 83.** HPLC isolation of [ $^{18}\text{F}$ ]FDOPA.

| Substrate            | Elution efficiency (EE)        | Isolated activity | RCY (non-decay corrected) | Enantiomeric excess (ee) | Synthesis time |
|----------------------|--------------------------------|-------------------|---------------------------|--------------------------|----------------|
| <i>L</i> - <b>68</b> | 143 mCi/(143+5.9)<br>mCi = 96% | 20.7 mCi          | 14.8%                     | 99%                      | 84 min         |

**Supplementary Table 80.** Automatic synthesis of [ $^{18}\text{F}$ ]FDOPA from *L*-**68** on an AllinOne module

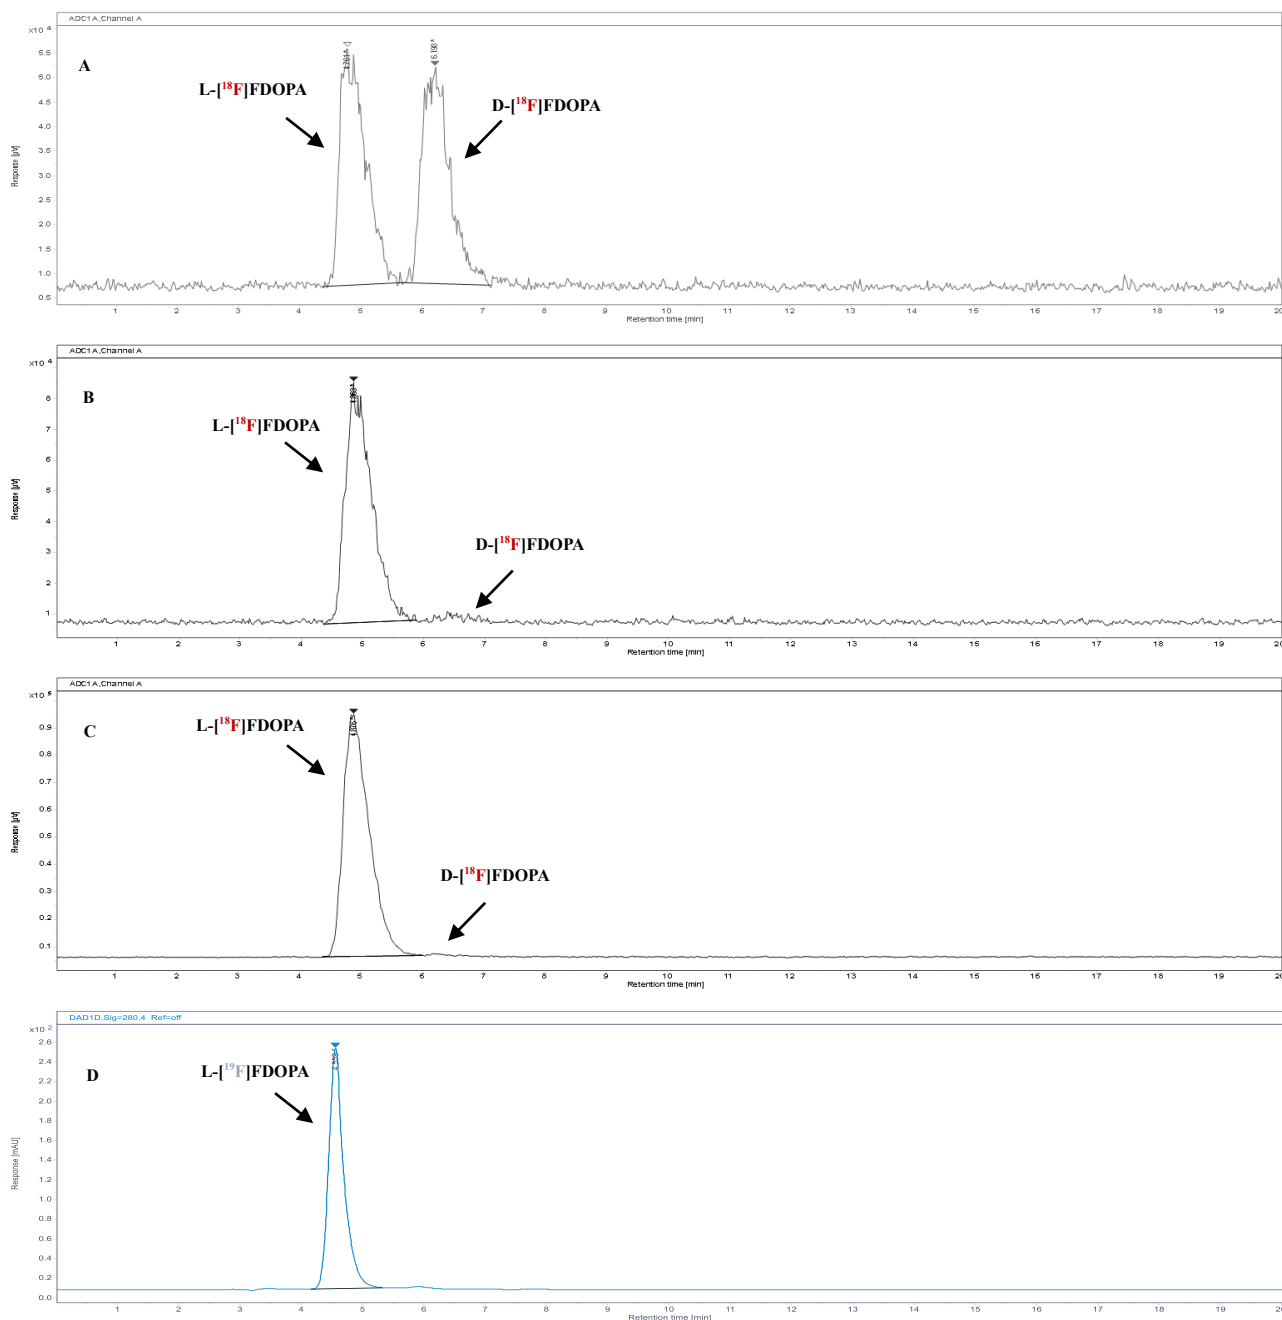

**Supplementary Figure 84.** HPLC traces for confirmation of  $[^{18}\text{F}]$ FDOPA. (A) radio-HPLC trace of racemic  $[^{18}\text{F}]$ FDOPA. (B) radio-HPLC trace of  $[^{18}\text{F}]$ FDOPA produced by a commercial AllinOne cassette. (C)  $[^{18}\text{F}]$ FDOPA produced by the azeotropic drying-free photoredox-catalyzed method. (D) UV trace (280 nm) of the  $[^{19}\text{F}]$ FDOPA.

#### 4. PET tracer preparation and imaging study

##### 4.1 Preparation of PET tracer $^{18}\text{F}$ -MFPG, L- $^{18}\text{F}$ -MFPG and D- $^{18}\text{F}$ -MFPG

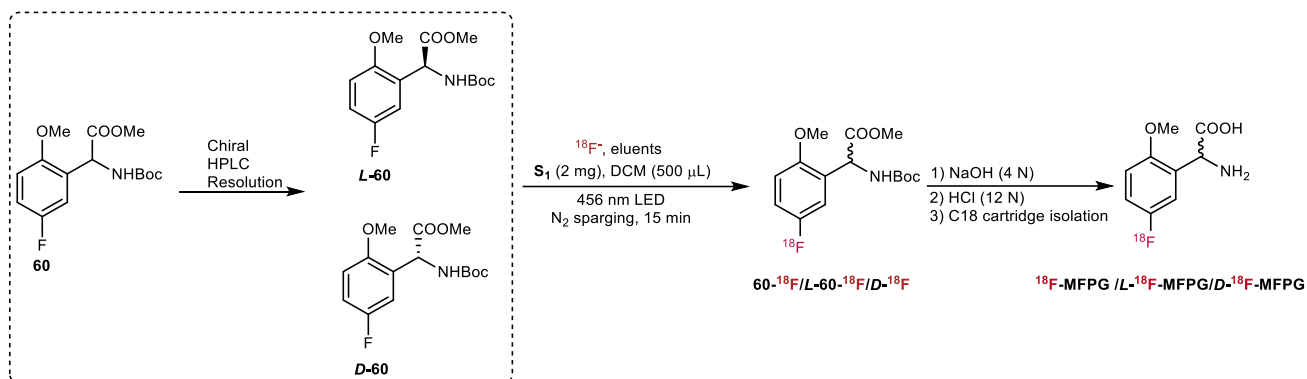

Following the general labelling procedure at section 3.8, the substrate **60** and two enantiomers (**L-60** and **D-60**) which were obtained from chiral HPLC resolution (Column: CHIRALPAK AY-3, 4.6\*100mm; Solvents: MeOH/MeCN, Supplementary Figure 80) were labelled under standard conditions with DCM as the solvent from 60 – 100 mCi  $^{18}\text{F}$ . After the irradiation, the reaction was diluted with 1 ml MeCN. The solution was passed through an aluminum cartridge (preconditioned with 5 ml water) to remove the unconverted  $^{18}\text{F}$ -fluoride. Rinse the reaction vial with another 1 ml MeCN which was then passed through the same aluminum cartridge. The elution was collected in a sealed 5 ml V-vial preloaded with 50  $\mu\text{l}$  4N NaOH solution. The solvent was removed under 100  $^\circ\text{C}$  with a nitrogen stream, which generally takes 20 to 25 min. After the solvent was removed, 100  $\mu\text{l}$  concentrated HCl was added into the V-vial, and the mixture was heated under 100  $^\circ\text{C}$  for 15 min. A venting needle was then equipped before 1 ml water and 400  $\mu\text{l}$  saturated  $\text{NaHCO}_3$  was slowly added to the V-vial. The resulting aqueous solution was loaded on a C18 cartridge preconditioned with 5 ml EtOH and 5 ml water. The C18 cartridge was then eluted with 2.5 ml water and the solution was collected in 1.5 ml Eppendorf tubes ( $\sim 500$   $\mu\text{l}$  each) to provide the PET tracers  $^{18}\text{F}\text{-MFPG}$ ,  $\text{L-}^{18}\text{F}\text{-MFPG}$  and  $\text{D-}^{18}\text{F}\text{-MFPG}$ , respectively. The Eppendorf tube, which collected the highest dose of activity (2 – 6 mCi), was analyzed on HPLC and used for PET imaging study after the pH was adjusted to around 7 and diluted with saline solution.

HPLC conditions for PET tracer analyzation:

Column: Phenomenex Gemini® C18 110Å column (5  $\mu\text{m}$ , 4.6  $\times$  250 mm). Solvent A: Phosphate buffer (pH = 8); Solvent B: Acetonitrile. Isocratic elution at 3% solvent B. Flow rate: 1 ml/min.

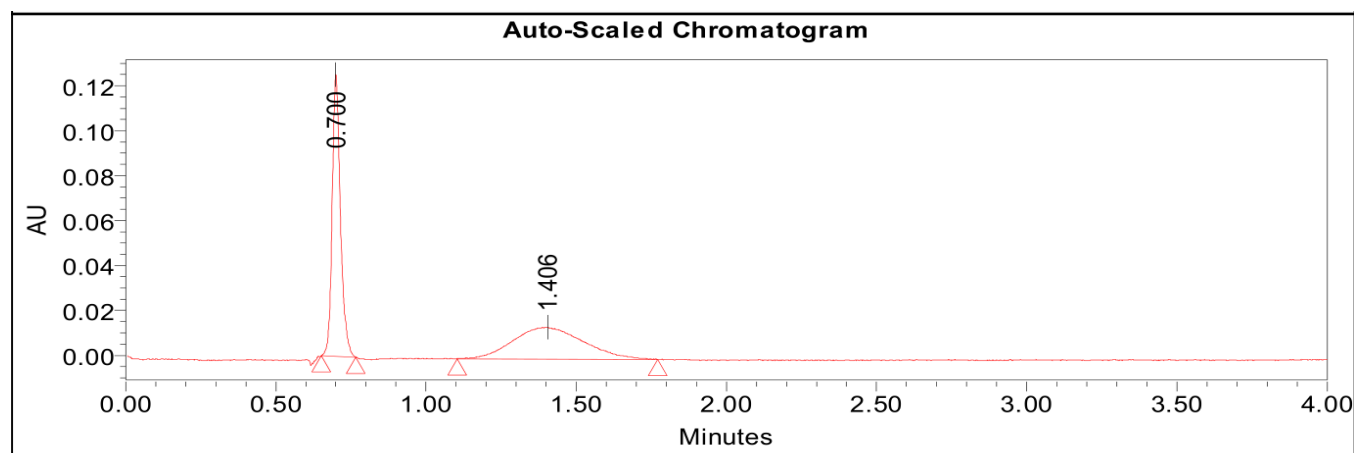

Supplementary Figure 85. Chiral HPLC resolution of **60** to provide the **L-60** and **D-60**

HPLC traces of  $^{18}\text{F}\text{-MFPG}$ :

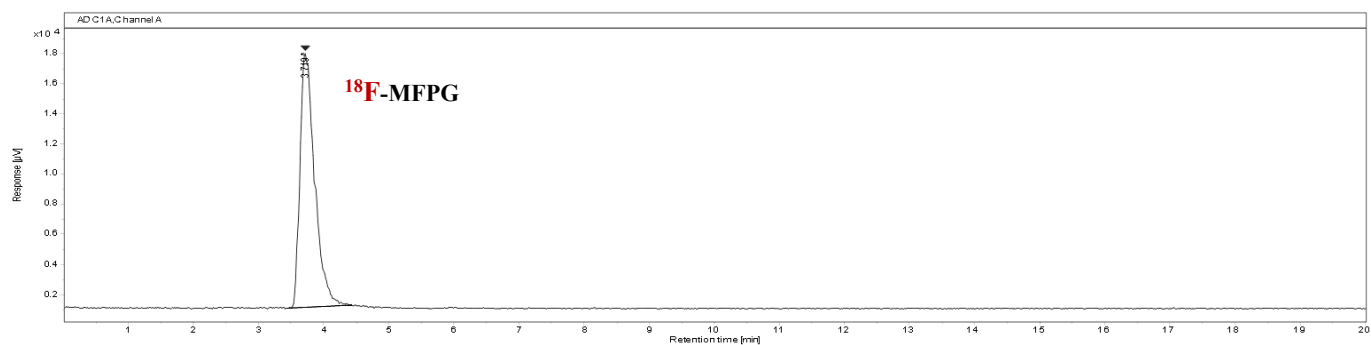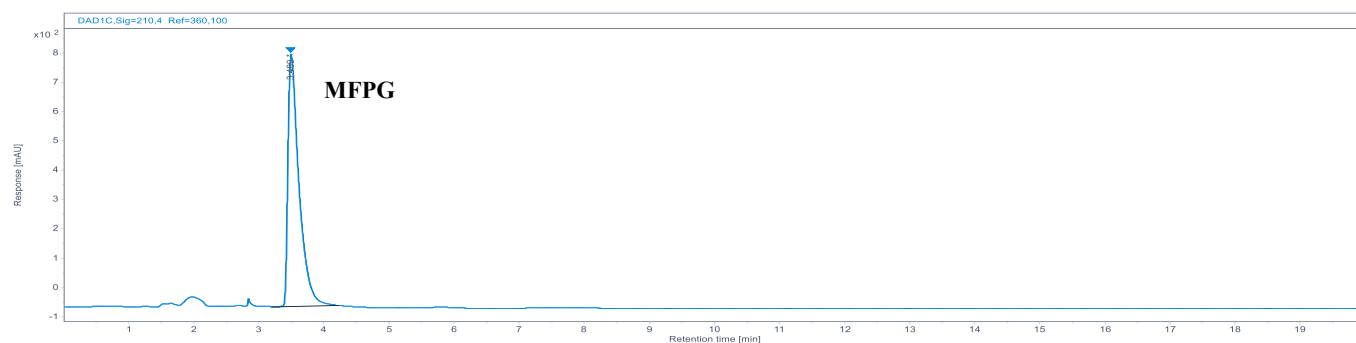

| # | RT (min) | Area (μV·s) | Area%   | Height (μV) | Height% | Start time (min) | End time (min) |
|---|----------|-------------|---------|-------------|---------|------------------|----------------|
| 1 | 3.719    | 264821.828  | 100.000 | 16948.991   | 100.00  | 3.424            | 4.432          |

**Supplementary Figure 86.** Radio-HPLC analysis of **<sup>18</sup>F-MFPG**.

### HPLC traces of *L*-<sup>18</sup>F-MFPG

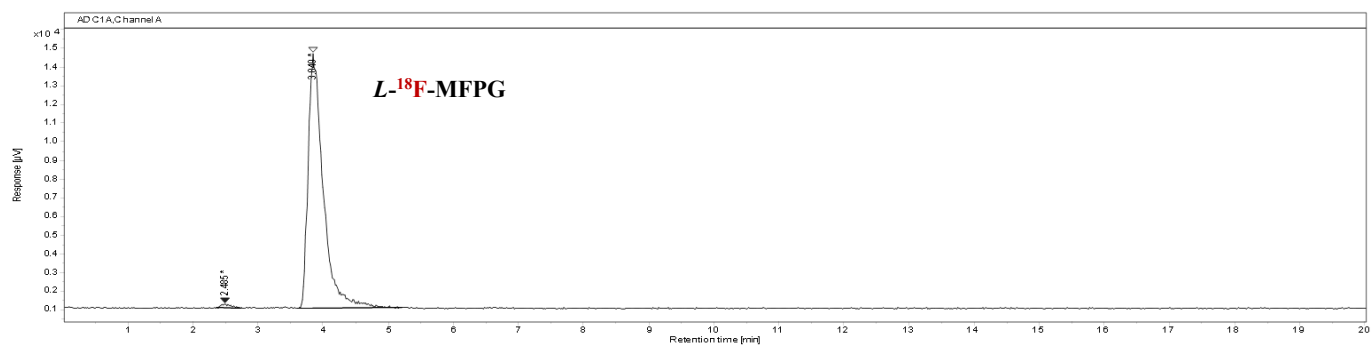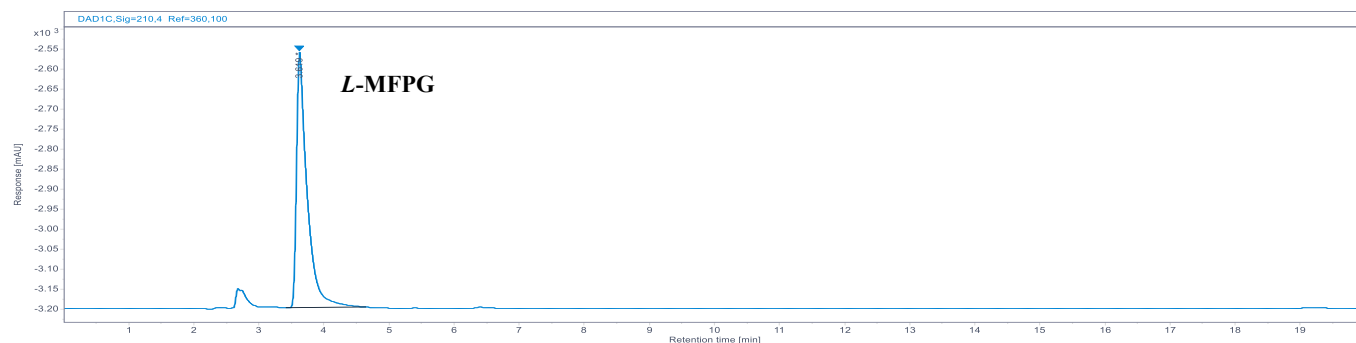

| # | RT (min) | Area (μV·s) | Area%  | Height (μV) | Height% | Start time (min) | End time (min) |
|---|----------|-------------|--------|-------------|---------|------------------|----------------|
| 1 | 2.485    | 1974.727    | 0.898  | 170.883     | 1.24    | 2.363            | 2.737          |
| 2 | 3.849    | 218037.943  | 99.102 | 13641.941   | 98.76   | 3.601            | 5.214          |

**Supplementary Figure 87.** Radio-HPLC analysis of *L*-<sup>18</sup>F-MFPG

**HPLC traces of *D*-<sup>18</sup>F-MFPG**

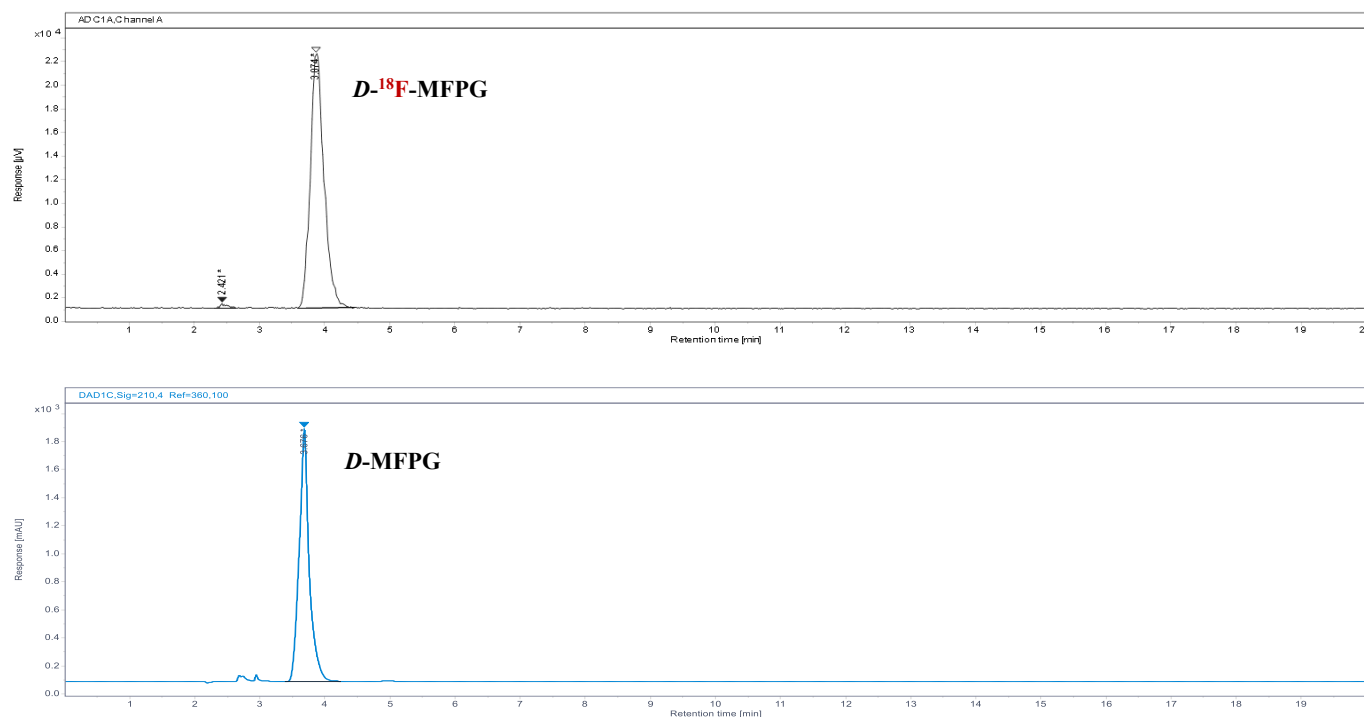

| # | RT (min) | Area (μV·s) | Area%  | Height (μV) | Height% | Start time (min) | End time (min) |
|---|----------|-------------|--------|-------------|---------|------------------|----------------|
| 1 | 2.421    | 2996.457    | 0.946  | 358.991     | 1.64    | 2.300            | 2.639          |
| 2 | 3.874    | 313802.533  | 99.054 | 21552.694   | 98.36   | 3.584            | 4.456          |

**Supplementary Figure 88.** Radio-HPLC analysis of *D*-<sup>18</sup>F-MFPG

#### 4.2 Racemization monitoring of the PET tracers

Considering that strong base and acid were used for the deprotection, the tracers after decay were analyzed on a chiral HPLC column. The HPLC UV traces demonstrated that there was no obvious racemization of the isolated *L*-<sup>18</sup>F-MFPG and *D*-<sup>18</sup>F-MFPG under current deprotection conditions (**Supplementary Figure 84**).

HPLC conditions:

Column: Astec CHIROBIOTICR T Chiral HPLC Column, 5 μm particle size, 250 mm x 4.6 mm, SUPELCO. Mobile phase: 0.2 mL formic acid in 700 mL MeOH and 300 mL water (pH = 3.5). Flow rate: 1 mL/min



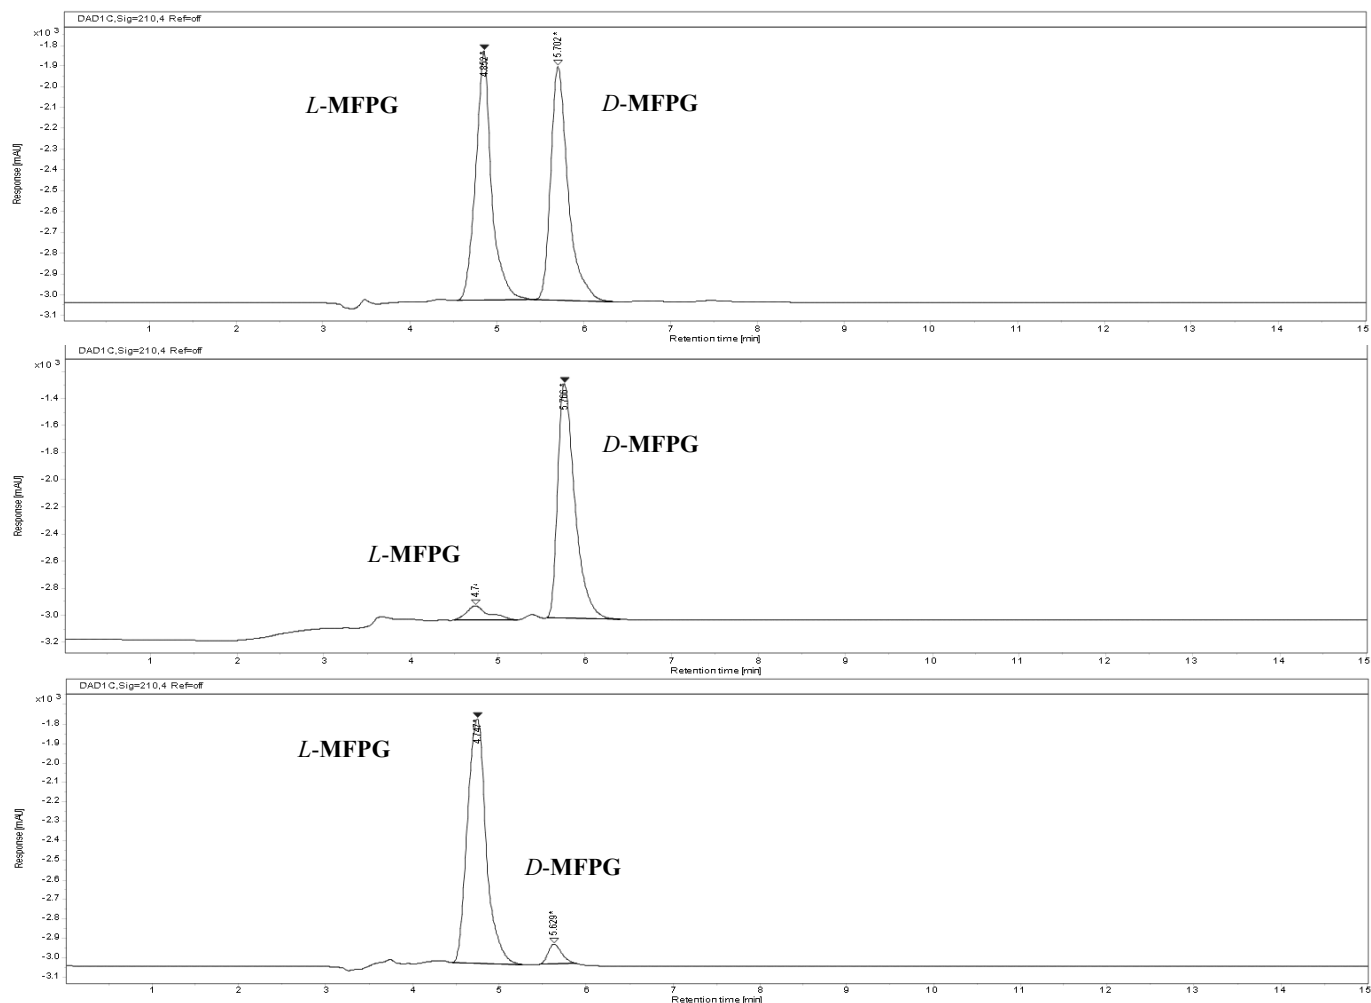

Supplementary Figure 89. Chiral HPLC analysis of the UV trace of the tracers

### 4.3 Confirmation of the absolute configuration of the two enantiomers $L$ - $^{18}\text{F}$ -MFPG and $D$ - $^{18}\text{F}$ -MFPG

The absolute configuration of the two enantiomers  $L$ - $^{18}\text{F}$ -MFPG and  $D$ - $^{18}\text{F}$ -MFPG were confirmed by comparison of the HPLC traces of the  $L$ -60-OH and  $D$ -60-OH with commercial standard compounds after removal of the methyl group on the oxygen (Supplementary Figure 85).

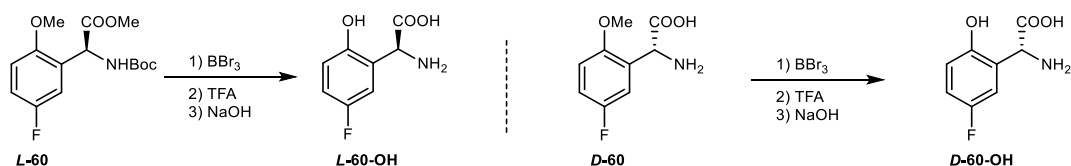

General procedure for the deprotection: the enantiomer (6.2 mg, 0.02 mmol) was dissolved in DCM (5 mL), 6.8  $\mu\text{L}$  (0.06 mmol)  $\text{BBr}_3$  was added. The mixture was stirred at room temperature for overnight and then quenched with 1 ml MeOH. The resulting solution were concentrated to remove volatile compounds. The residue was dissolved in 2 ml 10% TFA in DCM and stirred for 1h, the mixture was concentrated in vacuo. The residue was stirred in 1 ml 4 N NaOH for 1h, and then concentrated in vacuo to give the crude product of  $L$ -60-OH or  $D$ -60-OH, which were then analyzed and compared with commercial standards on

the HPLC. HPLC conditions: Column: Astec CHIROBIOTICR T Chiral HPLC Column, 5  $\mu$ m particle size, 250 mm x 4.6 mm, SUPELCO. Mobile phase: 0.2 mL formic acid in 800 ml MeOH and 200 mL water. Flow rate: 1 ml/min

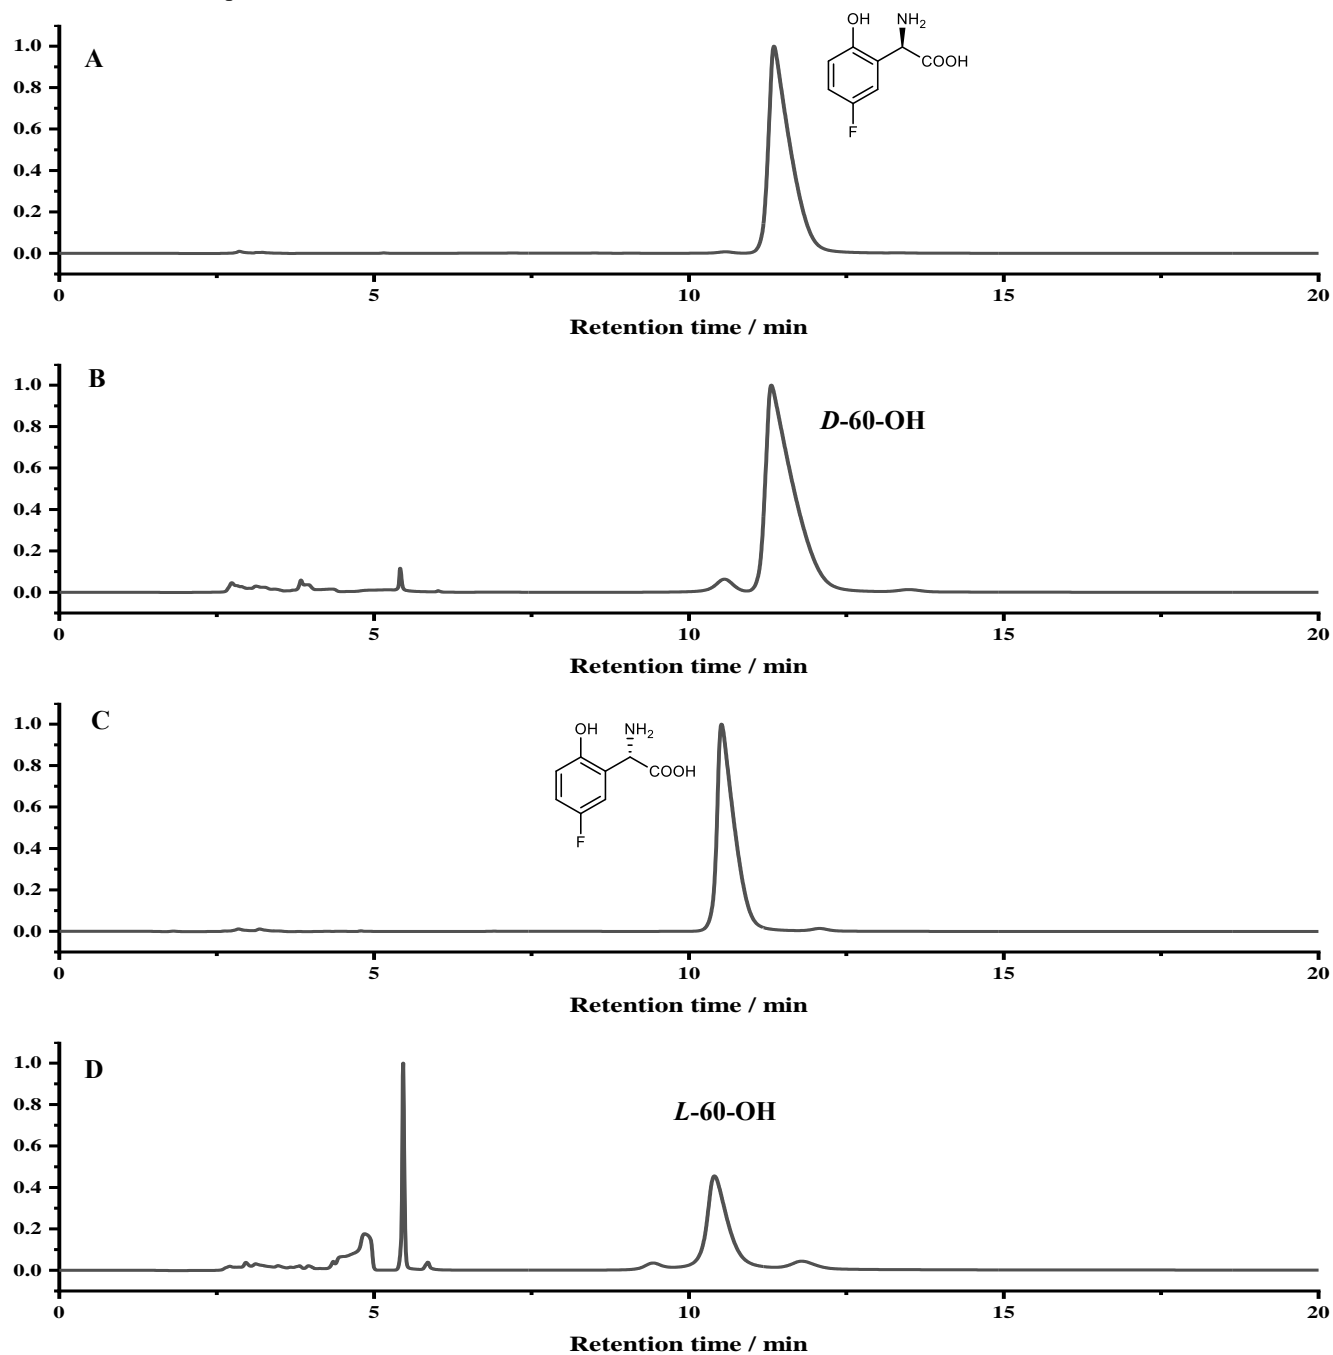

**Supplementary Figure 90.** Confirmation of the absolute configuration of the two enantiomers by comparison with standards. Commercial standards (**A** and **C**); Compound obtained from chiral resolution after deprotection (**B** and **D**)

## 4.4 PET imaging studies

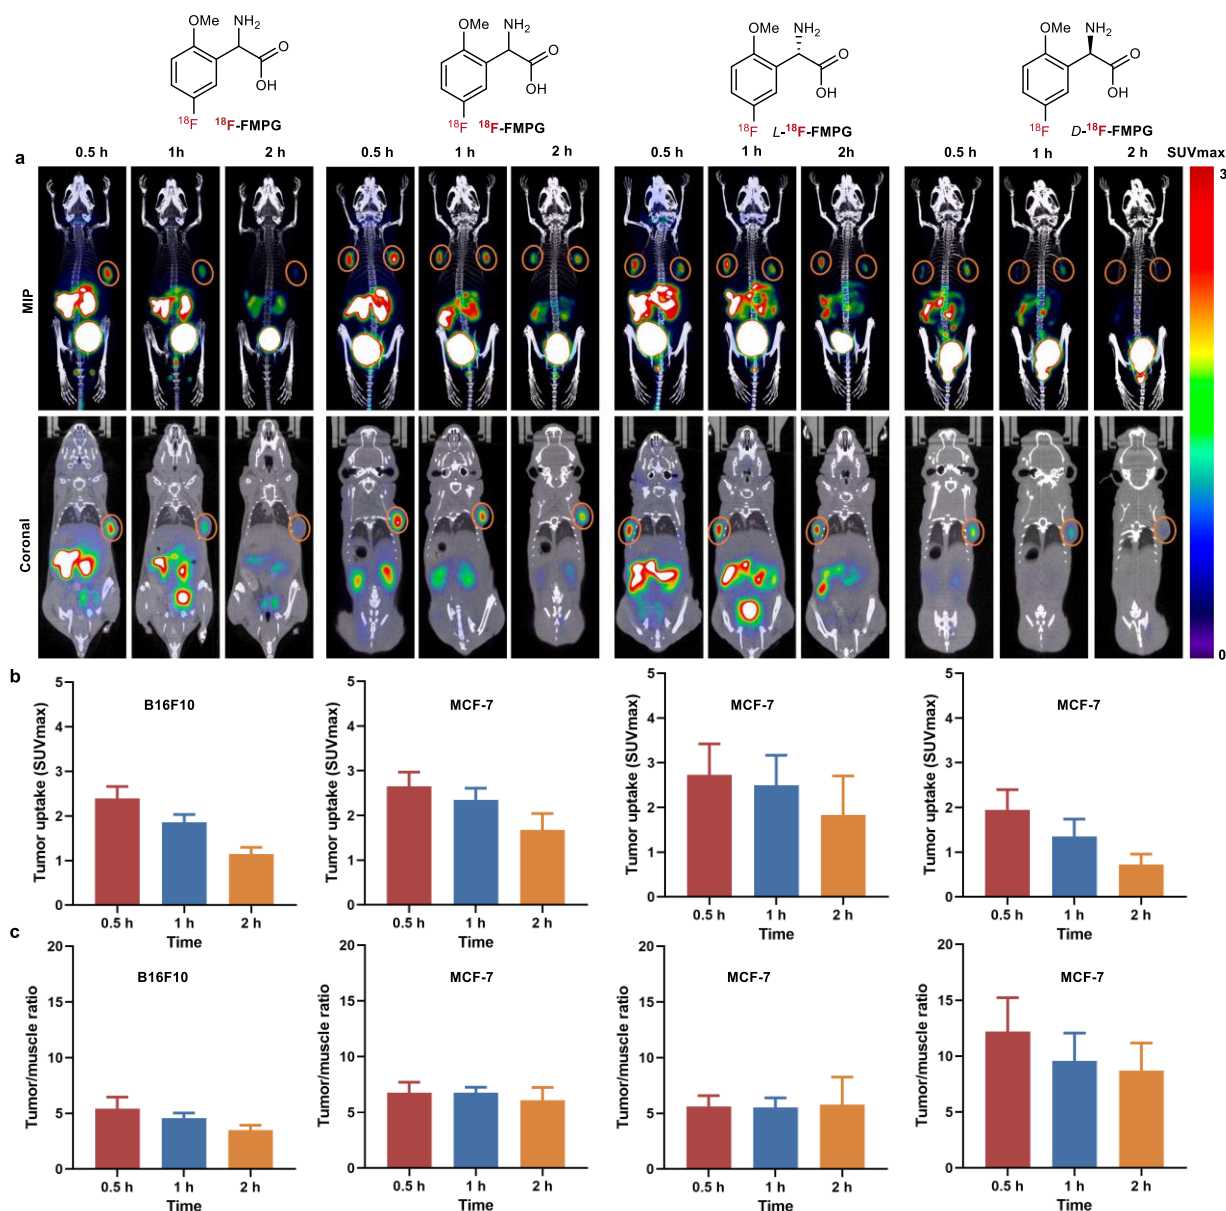

**Supplementary Figure 91.** a, PET imaging of the  $^{18}\text{F}$ -FMPG,  $L$ - $^{18}\text{F}$ -FMPG and  $D$ - $^{18}\text{F}$ -FMPG in B16F10 and MCF-7 tumour models (from left to right) at 0.5h, 1h, 2h post-injection. b, tumour uptake of  $^{18}\text{F}$ -FMPG,  $L$ - $^{18}\text{F}$ -FMPG and  $D$ - $^{18}\text{F}$ -FMPG (SUVmax) in B16F10 and MCF-7 tumour models (from left to right) at 0.5h, 1h, 2h post-injection. c, tumour/muscle ratio of  $^{18}\text{F}$ -FMPG,  $L$ - $^{18}\text{F}$ -FMPG and  $D$ - $^{18}\text{F}$ -FMPG (SUVmax) in B16F10 and MCF-7 tumour models (from left to right) at 0.5h, 1h, 2h post-injection.

All animal studies were conducted in compliance with the protocol approved by the Animal Care and Use Committees guidelines in West China Hospital and Sichuan University (Approval NO.20230515009). BALB/c nude mice and C57BL/6 mice (female, 6–8 weeks age) were used in our studies and obtained from Vital River Laboratory Animal Technology Co., Ltd. All animals were group-housed (no more than five mice per cage) at an air temperature of  $24 \pm 3$  °C, humidity of  $60 \pm 4\%$  and

a 12-h light/12-h dark cycle. Food and water were provided *ad libitum*. The female BALB/c mice were subcutaneously inoculated with MCF-7 breast cancer cells in a mixture of Matrigel (high protein concentration; Corning) and PBS ( $5 \times 10^6$  tumor cells in 200  $\mu\text{L}$  of Matrigel/PBS (1:1)). For female C57BL/6 mice, subcutaneous tumors were generated by inoculating B16-F10 mouse melanoma cells ( $5 \times 10^6$  tumor cells in 100  $\mu\text{L}$  PBS) suspension. Tumor size and animal weight were measured 2 times per week. When tumors were 100–200  $\text{mm}^3$ , PET/CT images of mice were produced using an IRIS small animal PET/CT imaging system (inviscan SAS, Strasbourg, France). Each PET tracer was tested randomly in at least three mice bearing unilateral or bilateral subcutaneous tumours to obtain an average uptake value.  $^{18}\text{F}$ -FMPG (3.7 MBq) was administered to the B16-F10 or MCF-7 tumor-bearing mice via the tail vein. At 30 min, 1 h, and 2 h post-injection, the tumor-bearing mice were imaged with the micro-PET/CT scan under anesthesia with 2% isoflurane. Data were acquired for 15 min for each scan and reconstructed with a three-dimensional ordered-subset expectation–maximization (3D-OSEM) algorithm with a Monte Carlo-based accurate detector model. CT acquisition was performed with 50 kV, 1 mA X-ray output and a total acquisition time of 140 s. PET images were analyzed using Osirix MD software version 10.0.4 (Pixmeo SARL), and data were expressed as standard uptake values (SUV) in animals. GraphPad Prism 9.5 was used to generate bar graphs and calculate means.

## 5. Reference

- [1] T. Verdelet, S. Benmahdjoub, B. Benmerad, M. Alami, S. Messaoudi, *J Org Chem* **2019**, *84*, 9226–9238.
- [2] N. E. S. Tay, W. Chen, A. Levens, V. A. Pistritto, Z. Huang, Z. Wu, Z. Li, D. A. Nicewicz, *Nat Catal* **2020**, *3*, 734–742.
- [3] W. Li, T. Yang, N. Song, R. Li, J. Long, L. He, X. Zhang, H. Lv, *Chem Sci* **2022**, *13*, 1808–1814.
- [4] X. Shen, C. N. Neumann, C. Kleinlein, N. W. Goldberg, T. Ritter, *Angew Chem Int Ed Engl* **2015**, *54*, 5662–5665.
- [5] M. Ordonez, A. Arizpe, F. J. Sayago, A. I. Jimenez, C. Cativiela, *Molecules* **2016**, *21*.
- [6] W. Chen, H. Wang, N. E. S. Tay, V. A. Pistritto, K. P. Li, T. Zhang, Z. Wu, D. A. Nicewicz, Z. Li, *Nat Chem* **2022**, *14*, 216–223.

## 6. NMR spectra ( $^1\text{H}$ NMR, $^{13}\text{C}$ NMR, $^{19}\text{F}$ NMR)

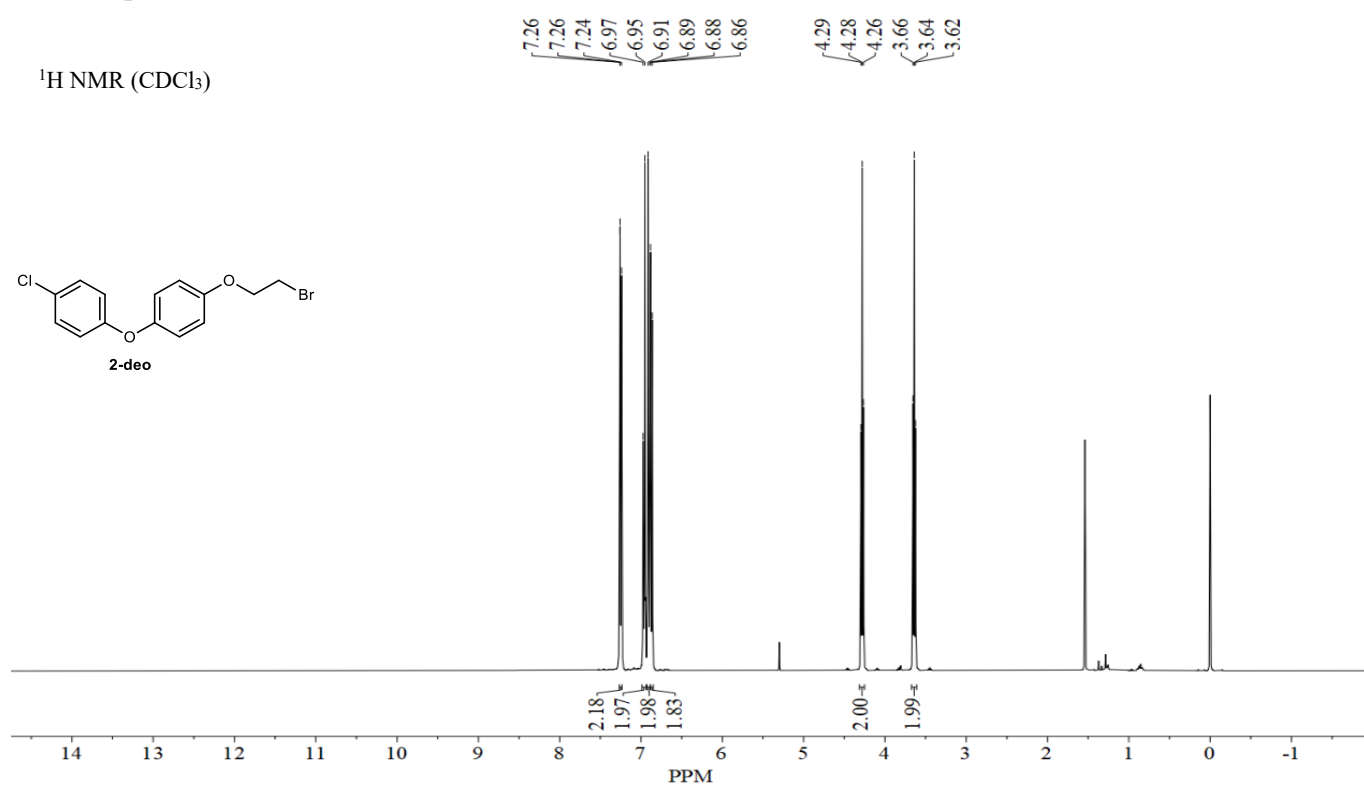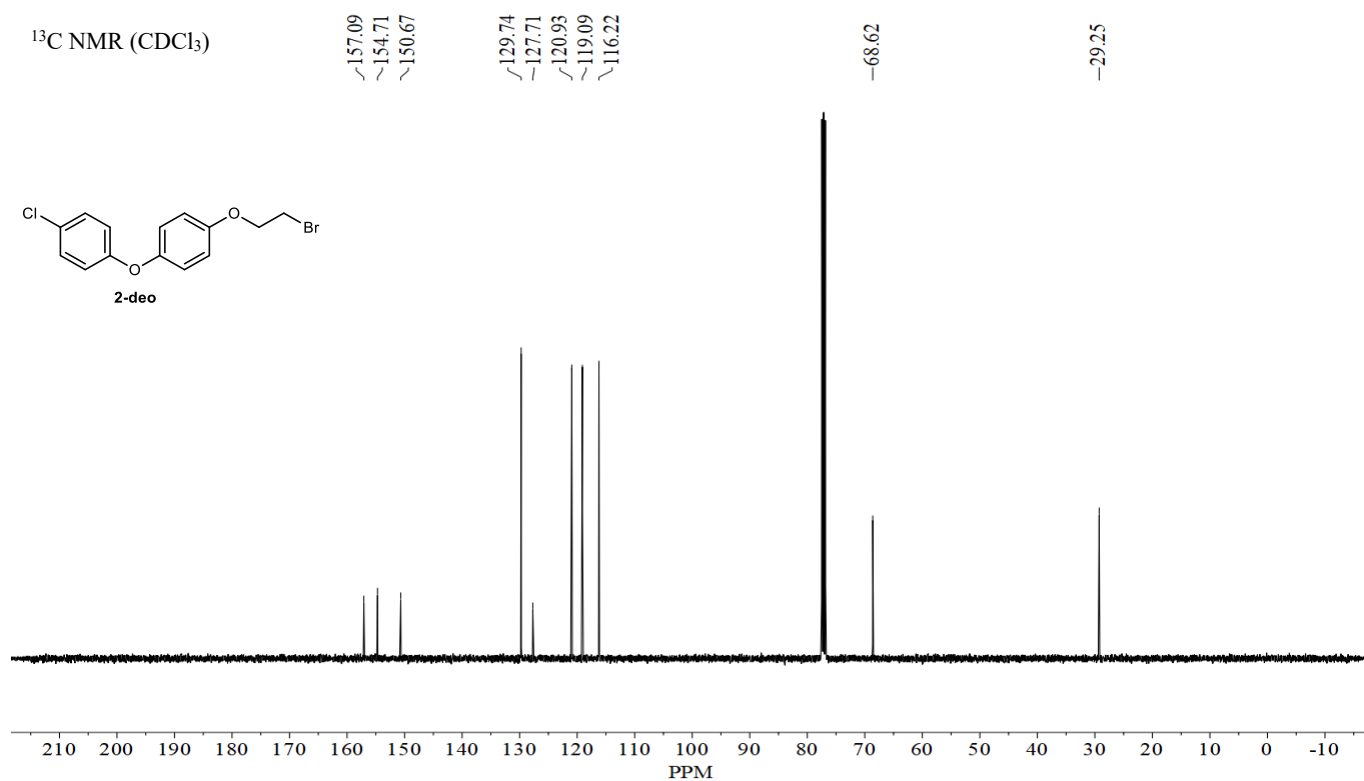

$^1\text{H}$  NMR ( $\text{CDCl}_3$ )

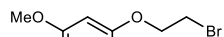

3

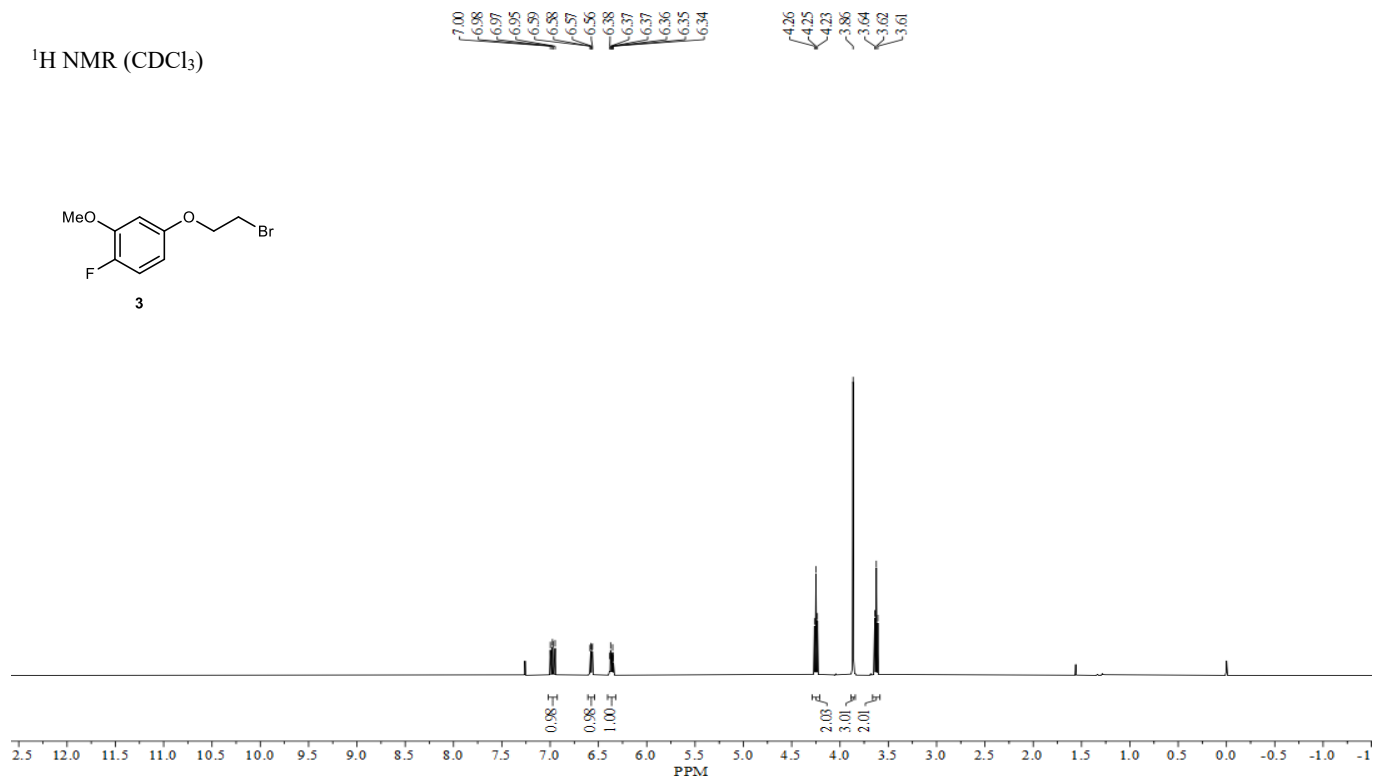

$^{13}\text{C}$  NMR ( $\text{CDCl}_3$ )

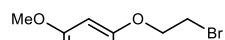

3

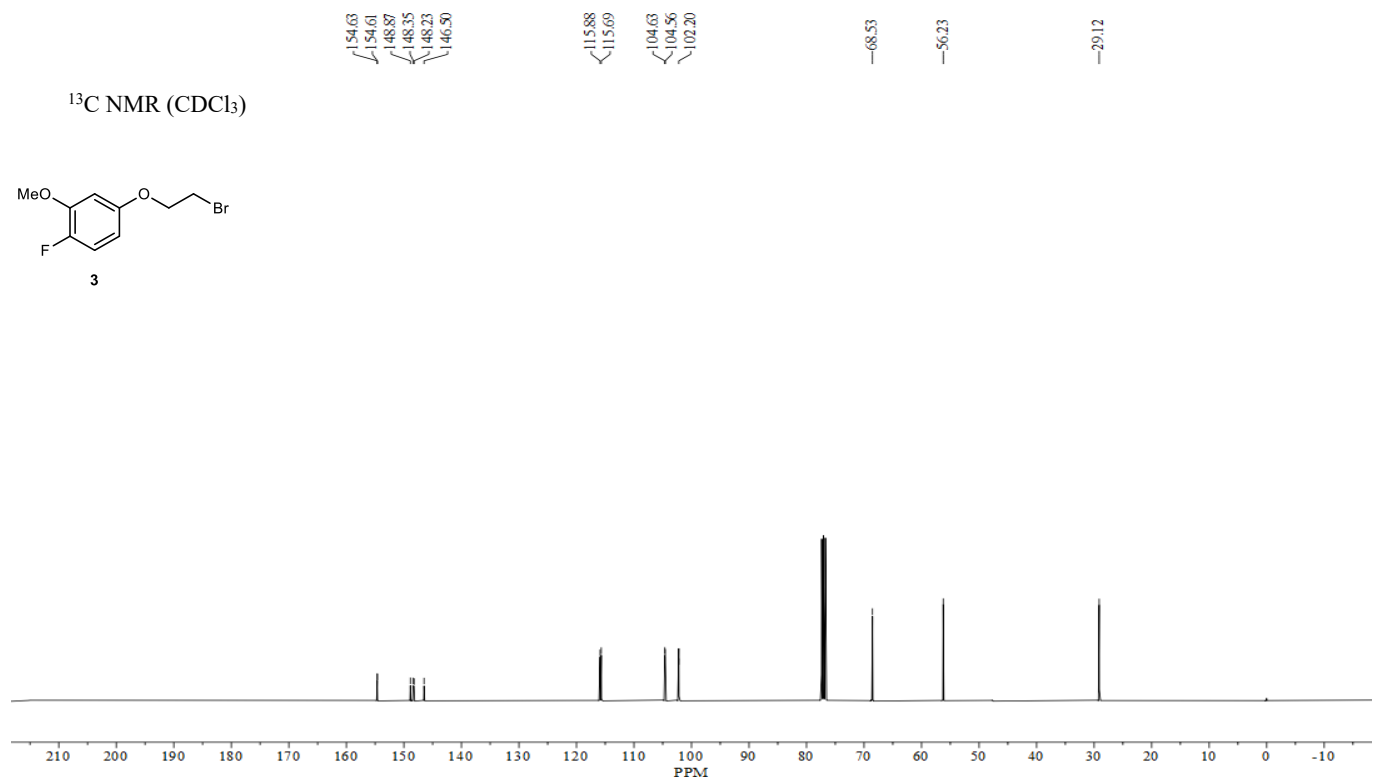

$^{19}\text{F}$  NMR ( $\text{CDCl}_3$ )

-144.44

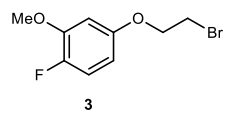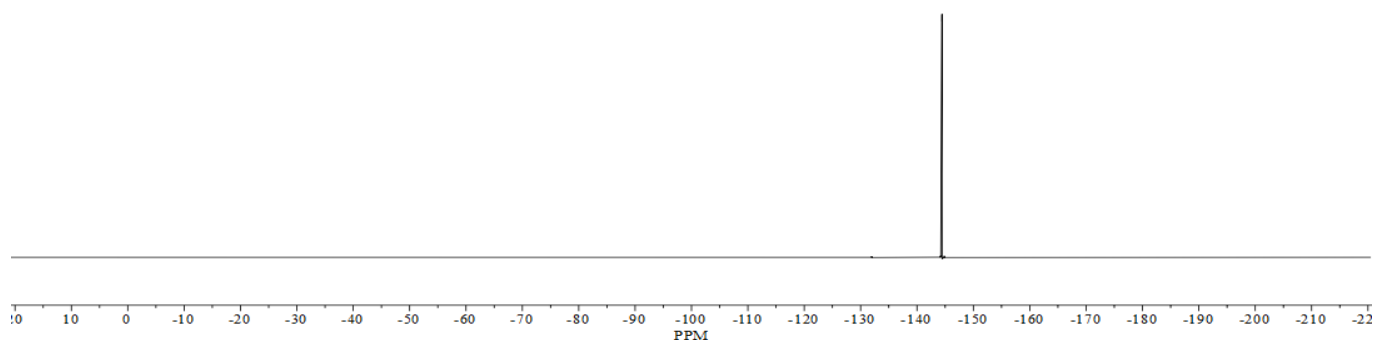

$^1\text{H}$  NMR ( $\text{CDCl}_3$ )

7.00, 6.99, 6.99, 6.98, 6.97, 6.97, 6.96, 6.96, 6.95, 6.95, 6.94, 6.87, 6.86, 6.85, 6.85, 6.84, 6.84, 6.83, 6.82, 4.10, 4.09, 4.07, 3.86, 3.85, 2.07, 2.05, 2.04, 2.04, 2.02, 2.01, 1.73

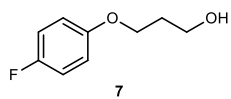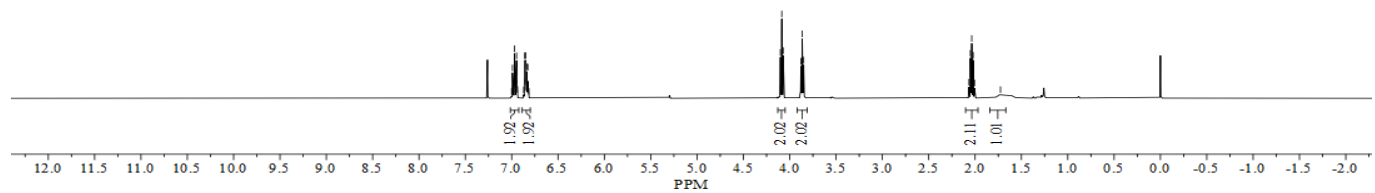

158.50  
156.13  
154.91  
154.89

115.94  
115.71  
115.50  
115.42

66.33  
60.38

32.00

$^{13}\text{C}$  NMR ( $\text{CDCl}_3$ )

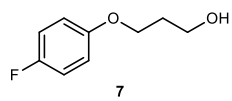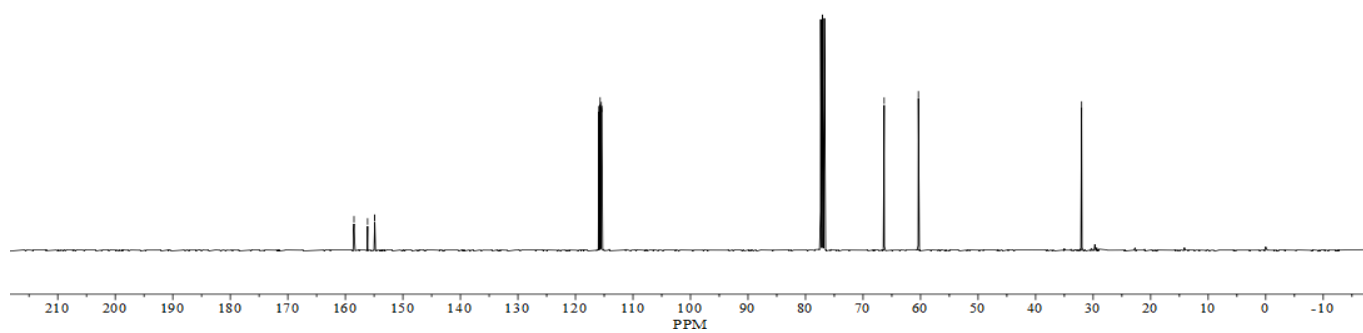

$^{19}\text{F}$  NMR ( $\text{CDCl}_3$ )

-123.89

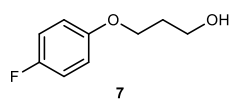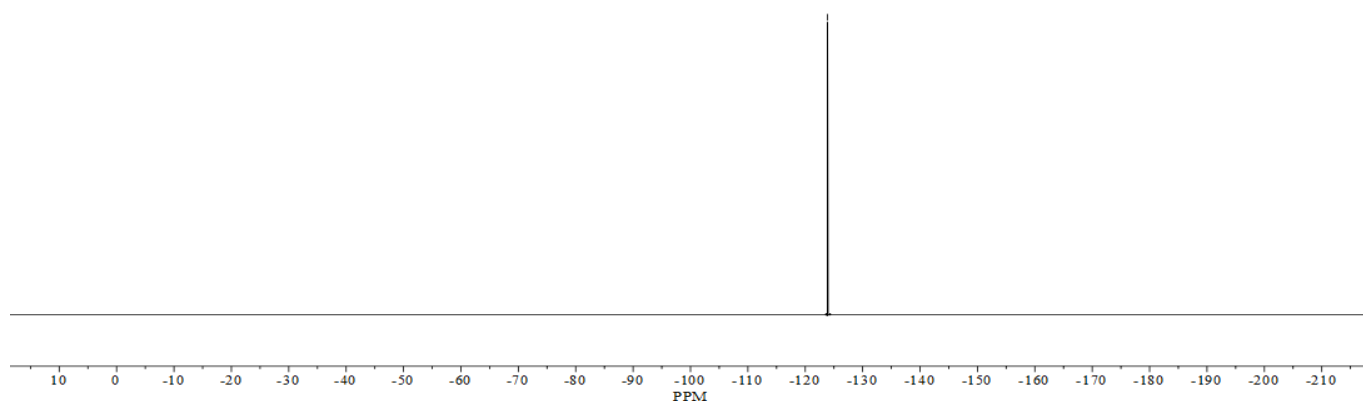



$^1\text{H}$  NMR ( $\text{CDCl}_3$ )

6.99, 6.99, 6.97, 6.95, 6.89, 6.88, 6.87, 6.86, 6.85, 4.11, 4.10, 4.10, 4.09, 3.87, 3.86, 3.84, 3.78, 3.77, 3.76, 3.68, 3.67, -2.10

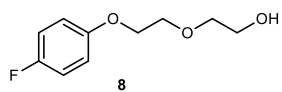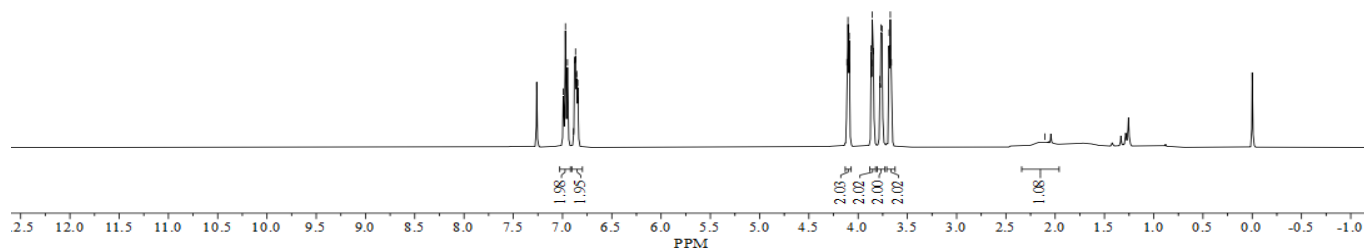

$^{13}\text{C}$  NMR ( $\text{CDCl}_3$ )

158.62, 156.25, 154.80, 154.78, 115.96, 115.74, 115.70, 115.63, 72.58, 69.70, 68.08, 61.80

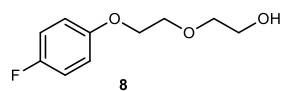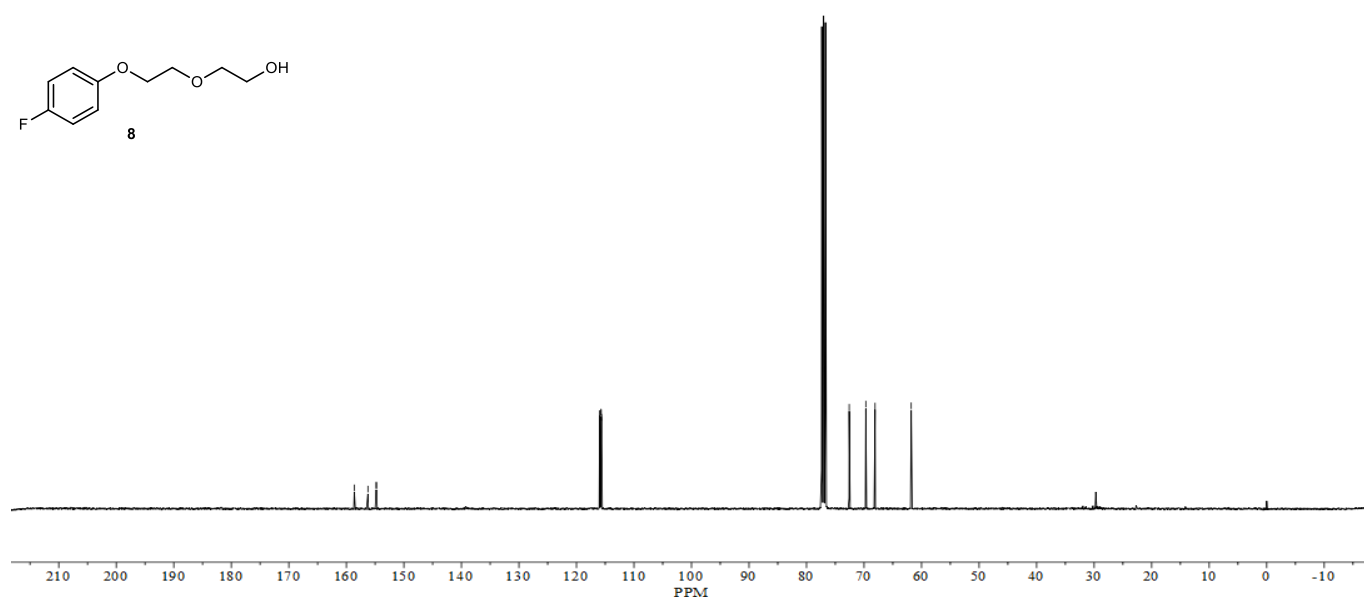

$^{19}\text{F}$  NMR ( $\text{CDCl}_3$ )

—123.62

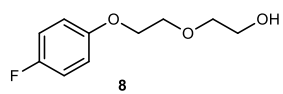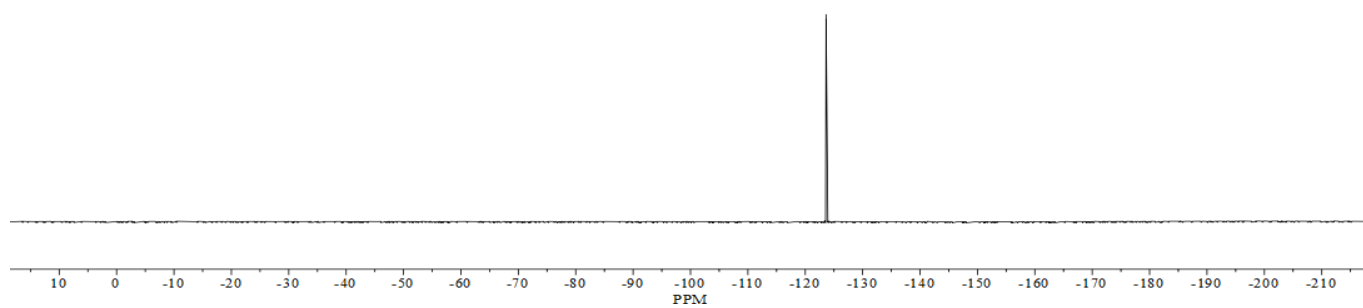

$^1\text{H}$  NMR ( $\text{CDCl}_3$ )

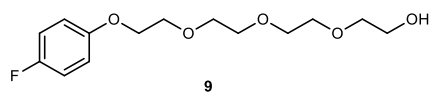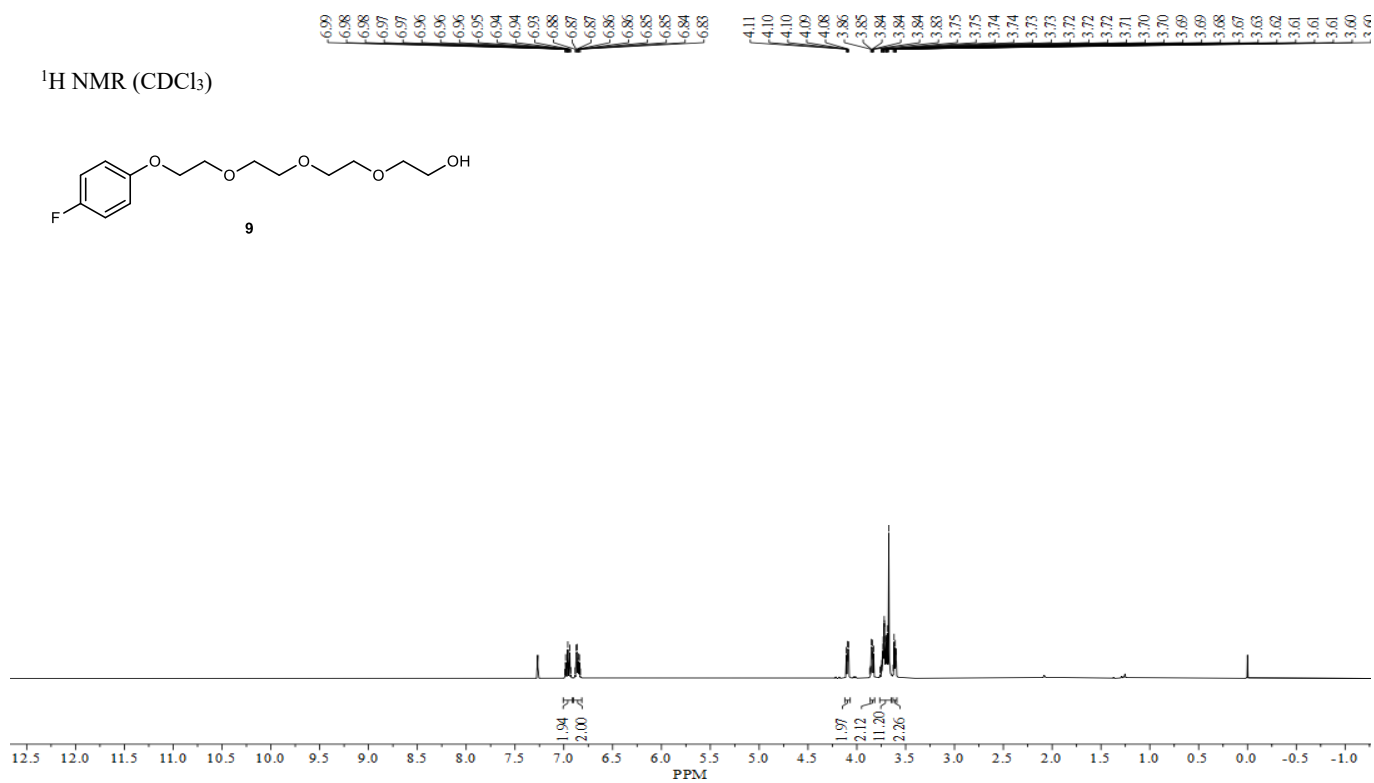

$^{13}\text{C}$  NMR ( $\text{CDCl}_3$ )

158.54  
156.17  
154.88  
154.86

115.88  
115.70  
115.65  
115.62

72.55  
70.80  
70.66  
70.59  
70.32  
69.76  
68.07  
61.75

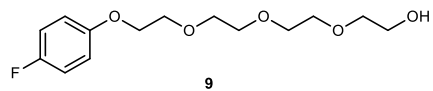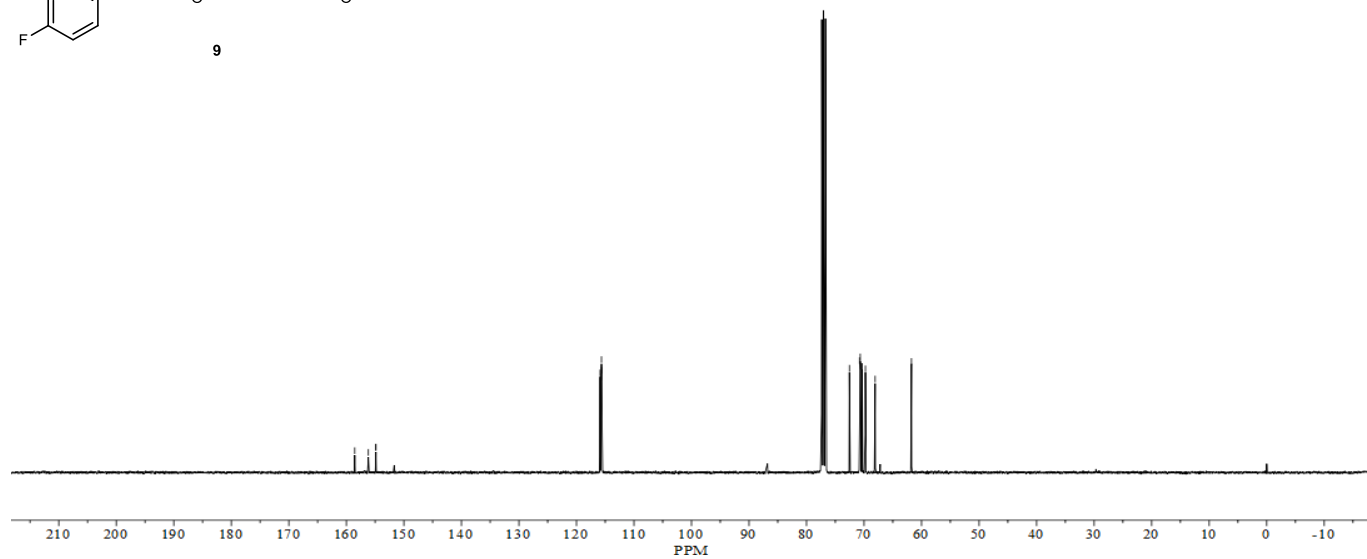

$^{19}\text{F}$  NMR ( $\text{CDCl}_3$ )

-123.88

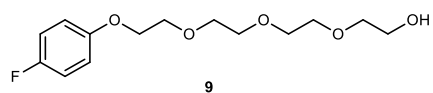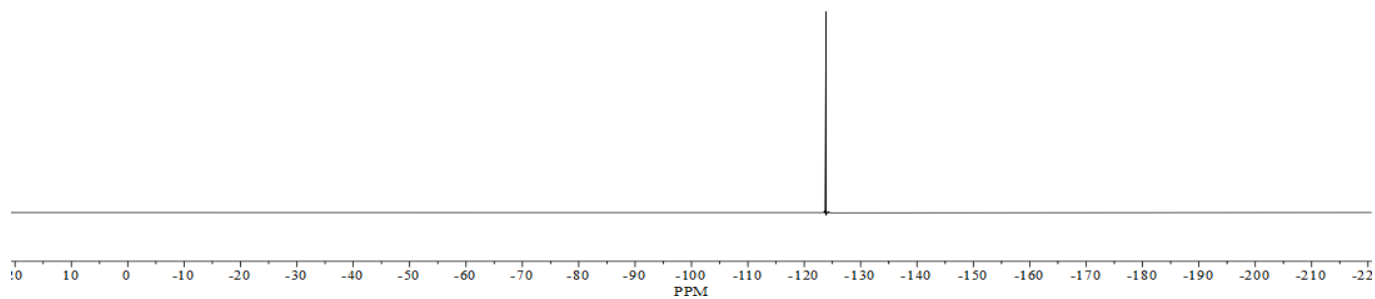

$^1\text{H}$  NMR ( $\text{CDCl}_3$ )

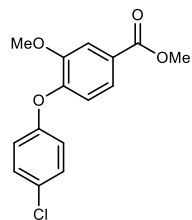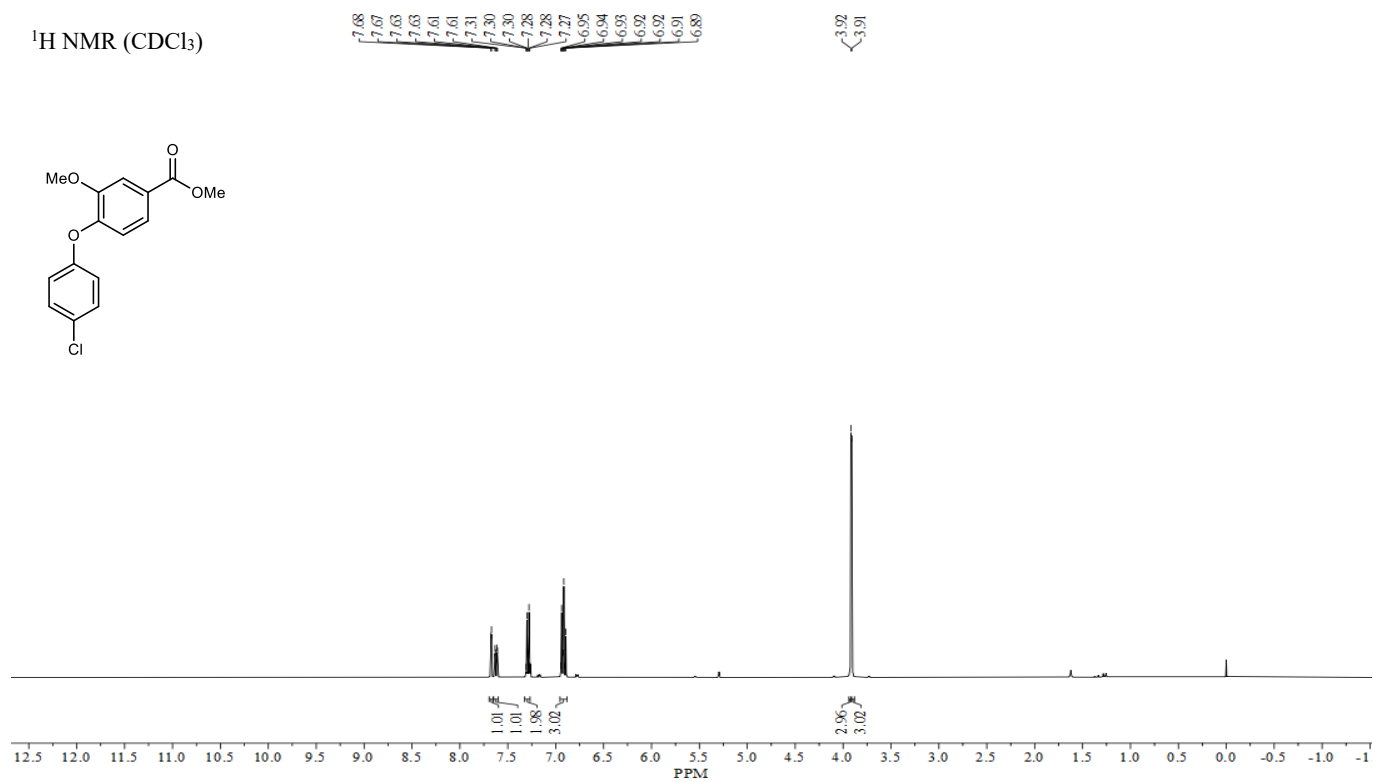

$^{13}\text{C}$  NMR ( $\text{CDCl}_3$ )

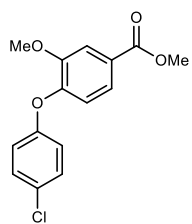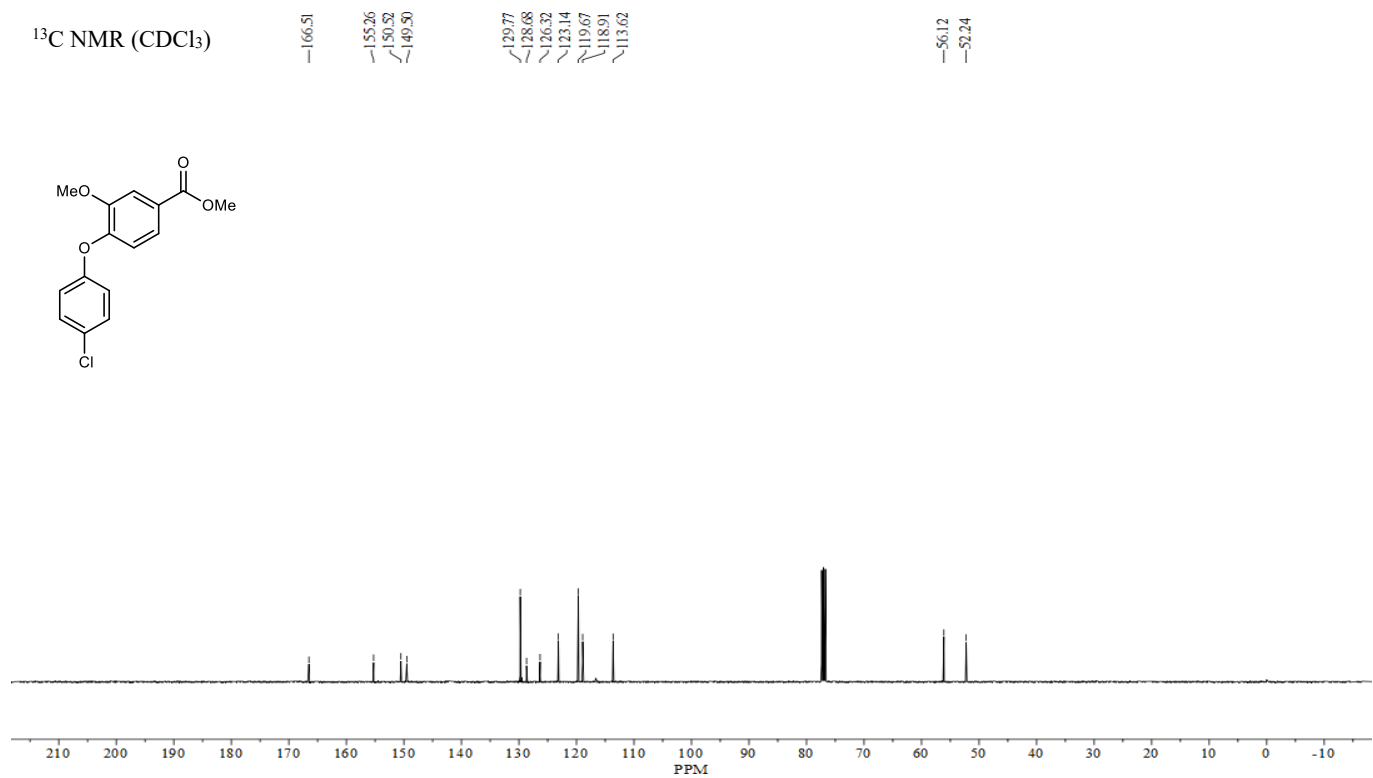

$^1\text{H}$  NMR ( $\text{CDCl}_3$ )

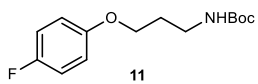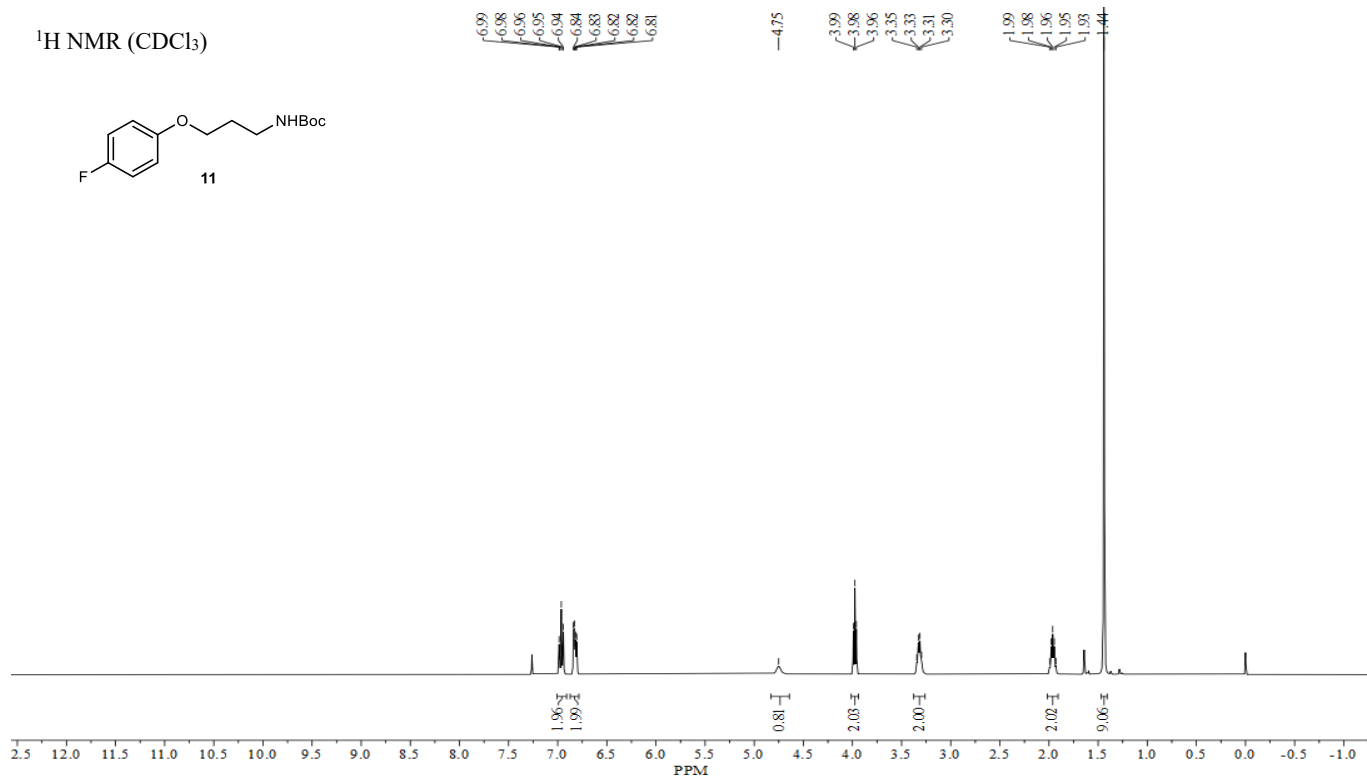

$^{13}\text{C}$  NMR ( $\text{CDCl}_3$ )

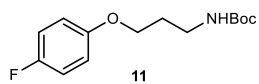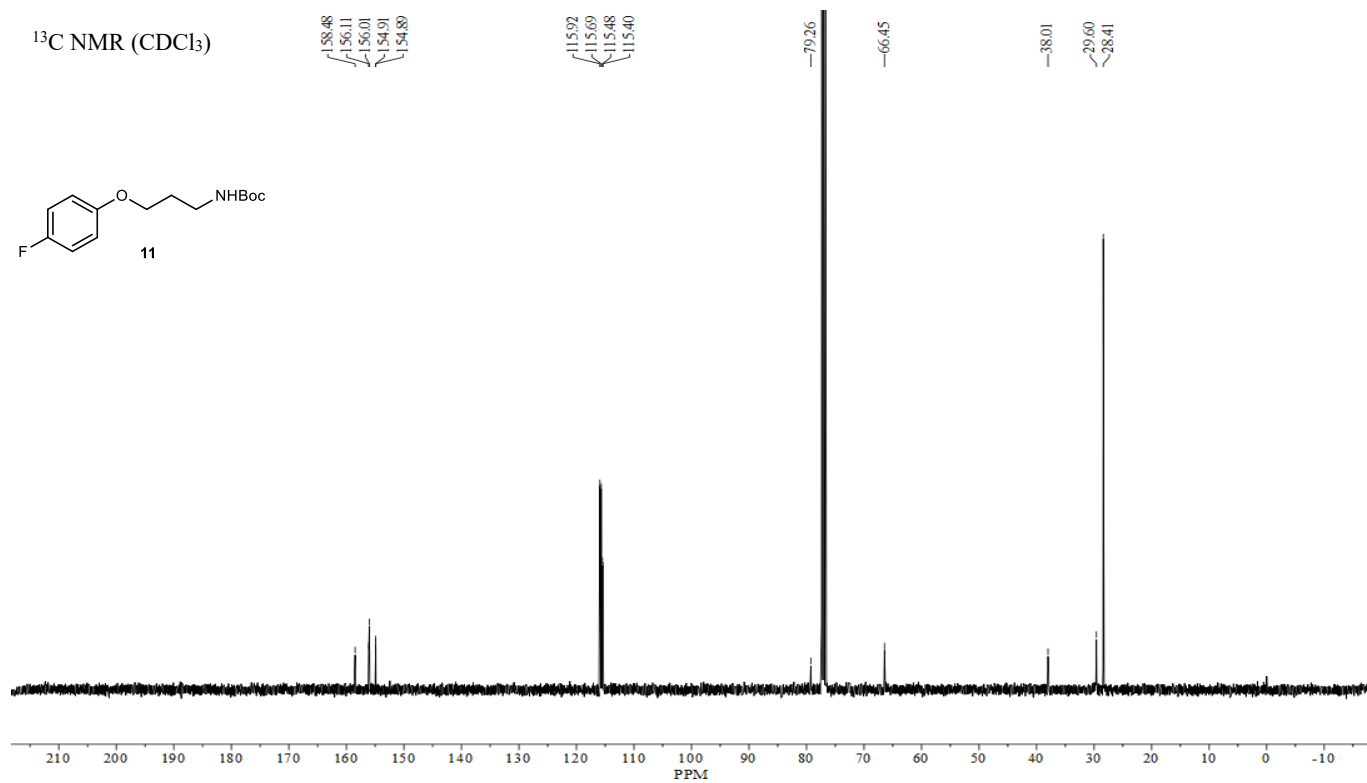

$^{19}\text{F}$  NMR ( $\text{CDCl}_3$ )

—123.96

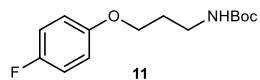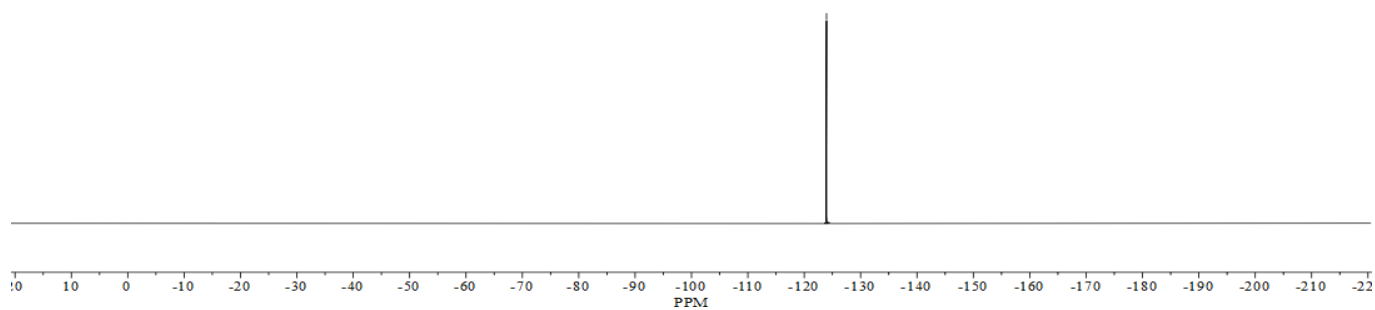

$^1\text{H}$  NMR ( $\text{CDCl}_3$ )

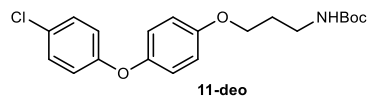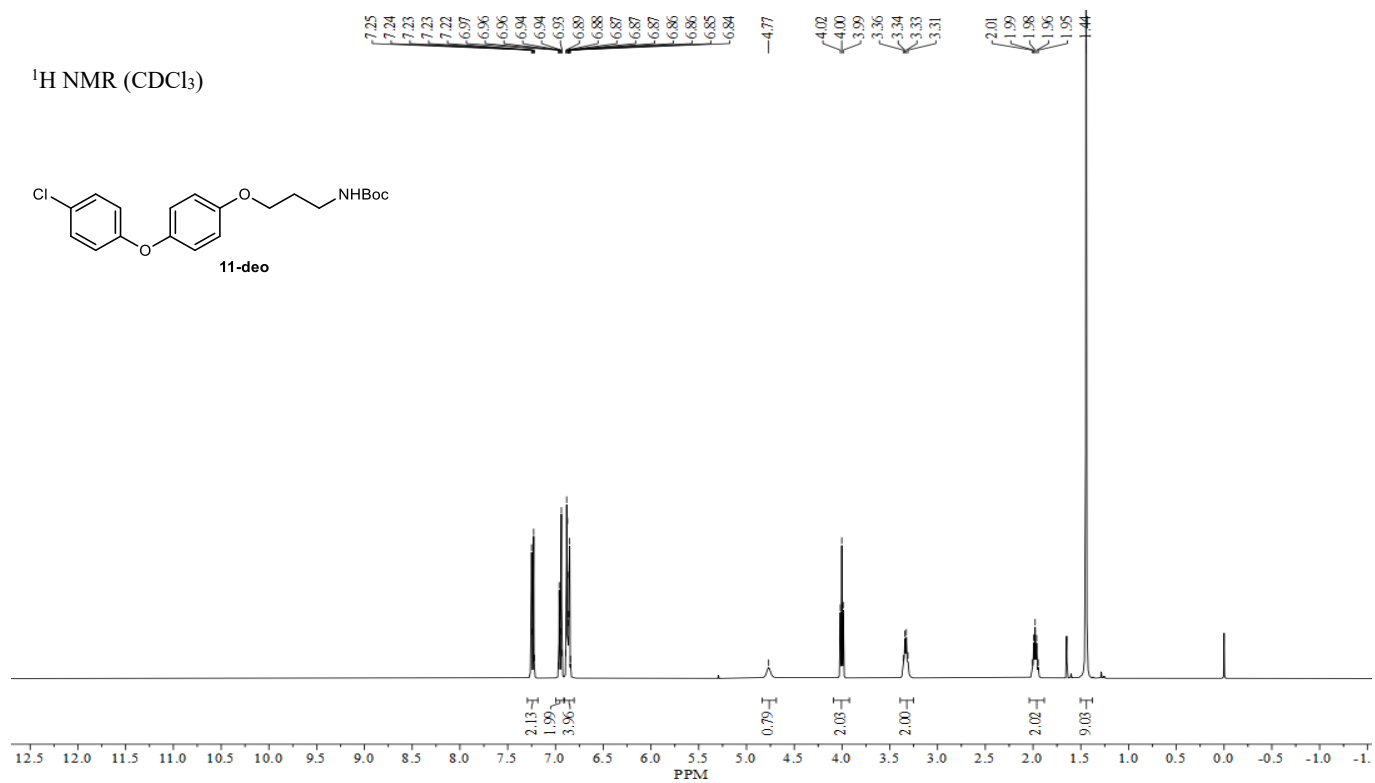

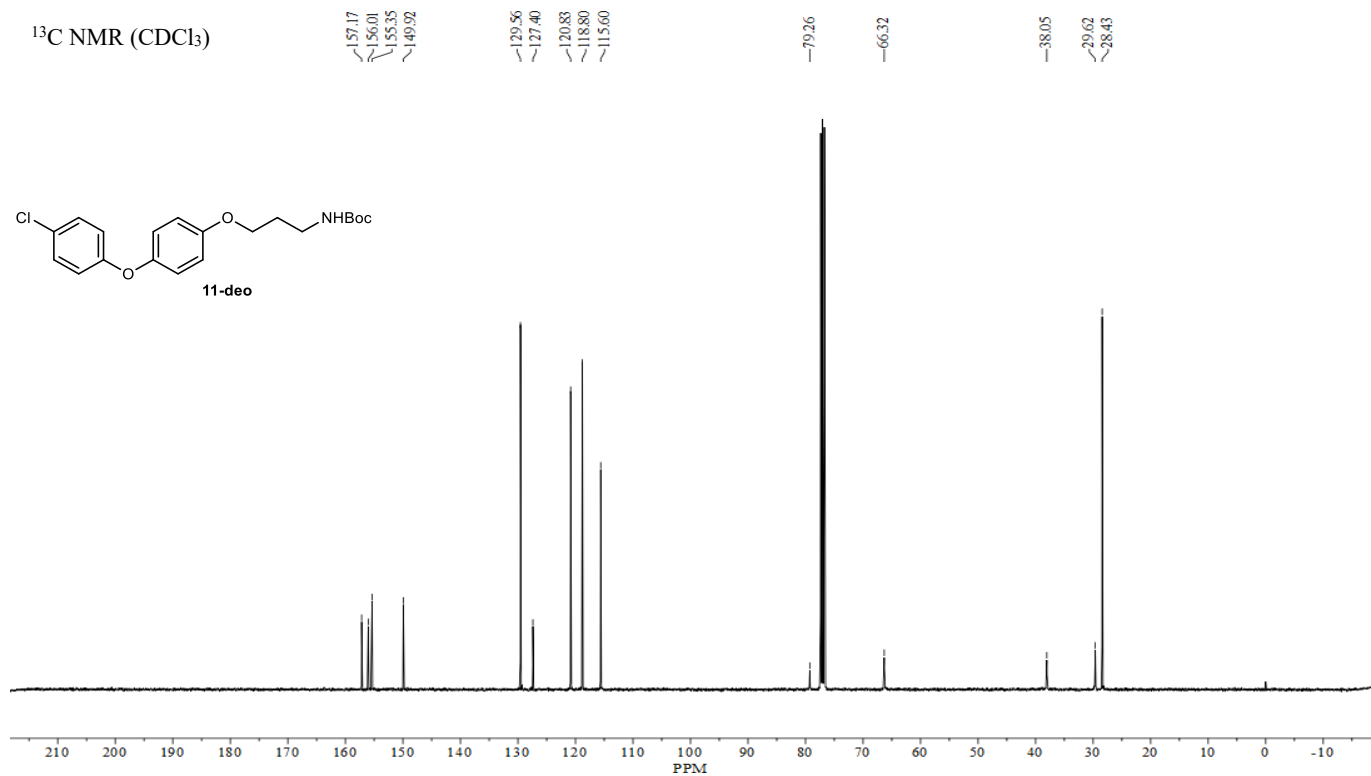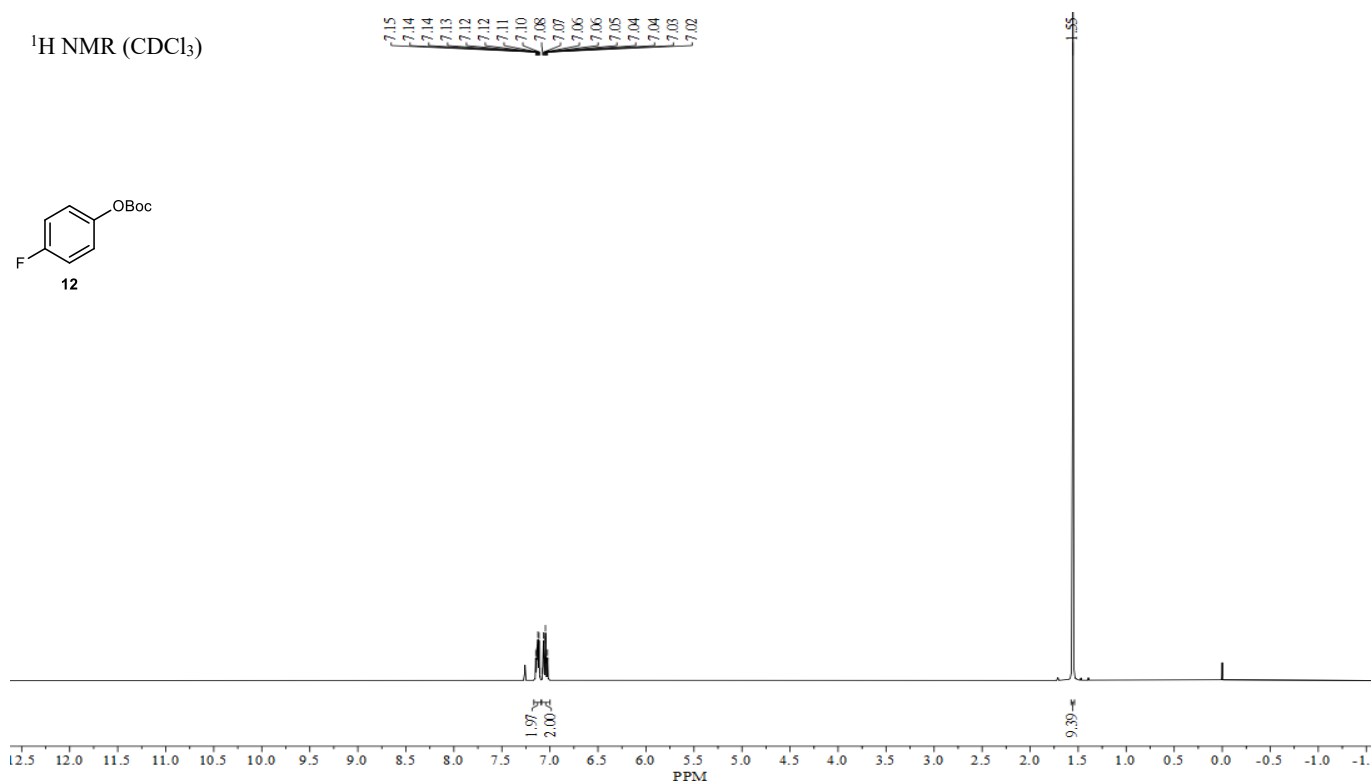

$^{13}\text{C}$  NMR ( $\text{CDCl}_3$ )

161.37  
158.94  
151.91  
146.98  
146.95

122.76  
122.67  
116.10  
115.87

83.77

27.68

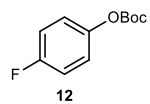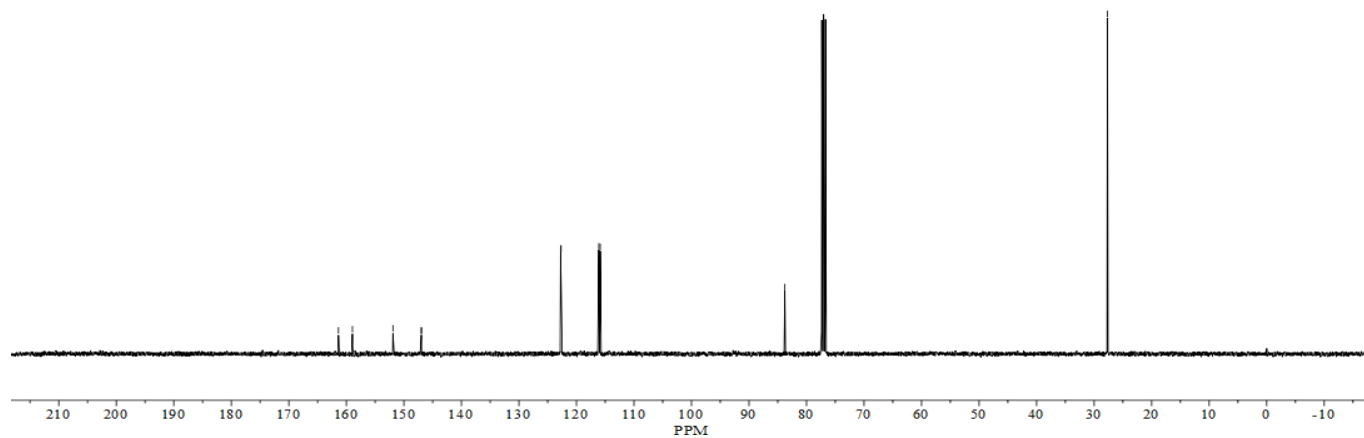

$^{19}\text{F}$  NMR ( $\text{CDCl}_3$ )

-117.14

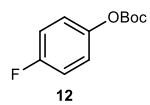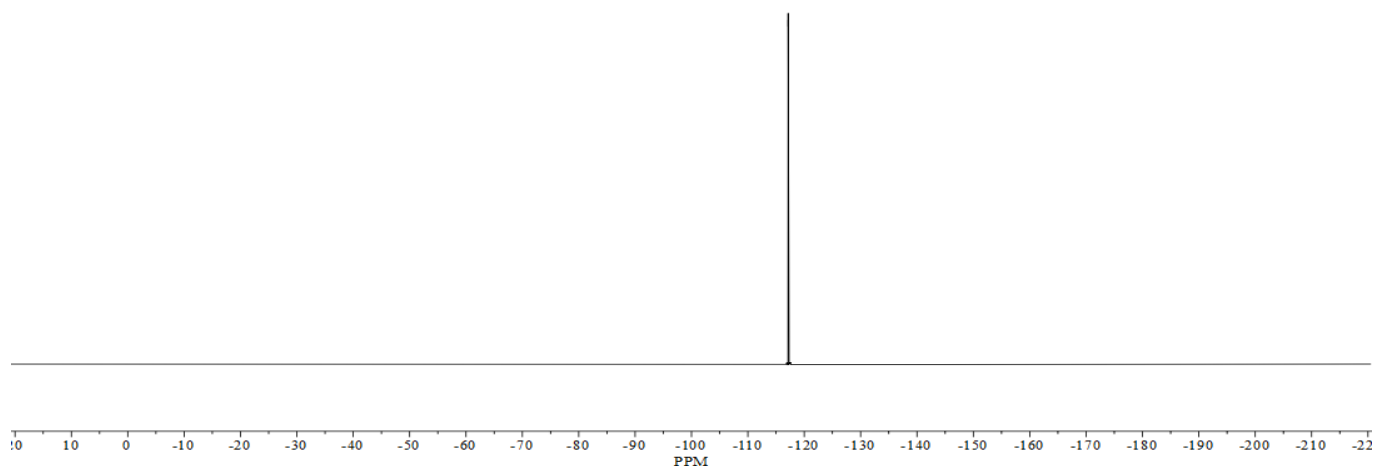



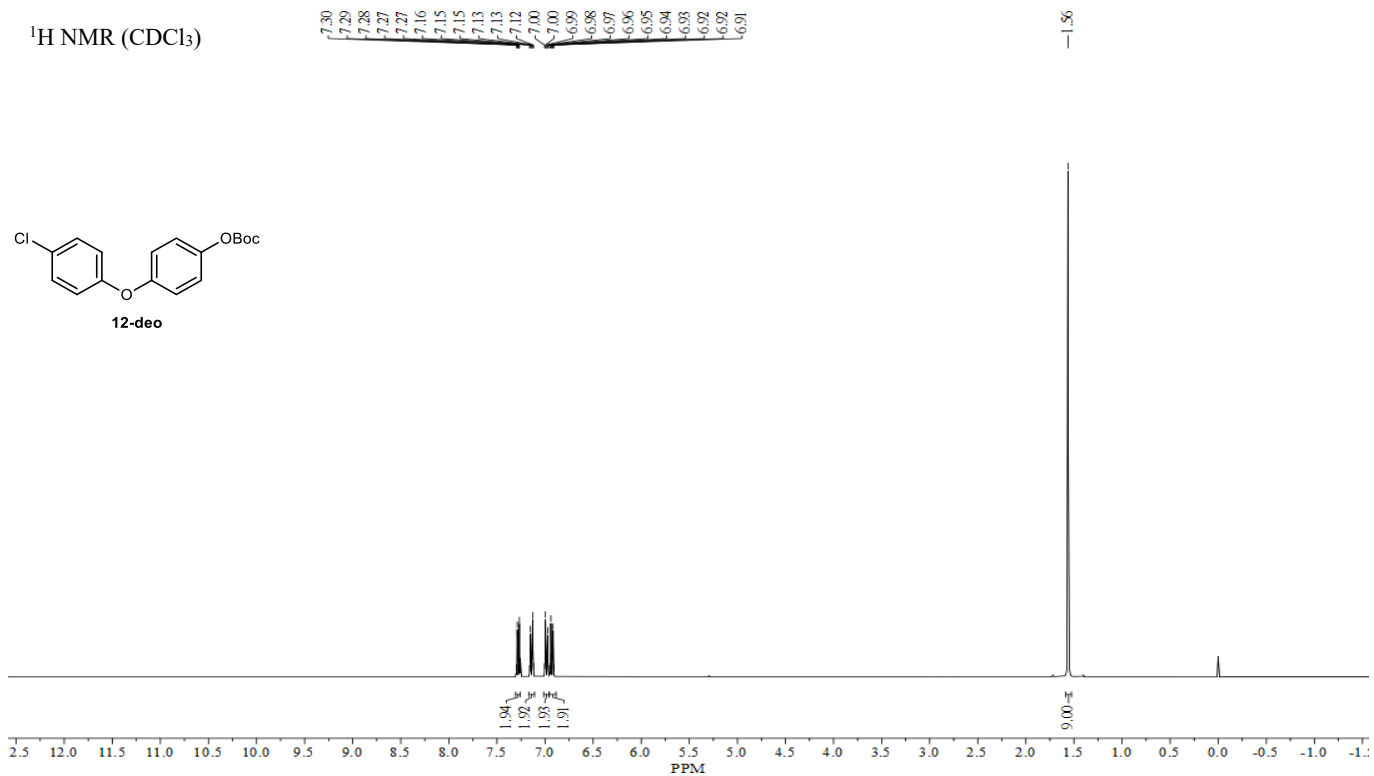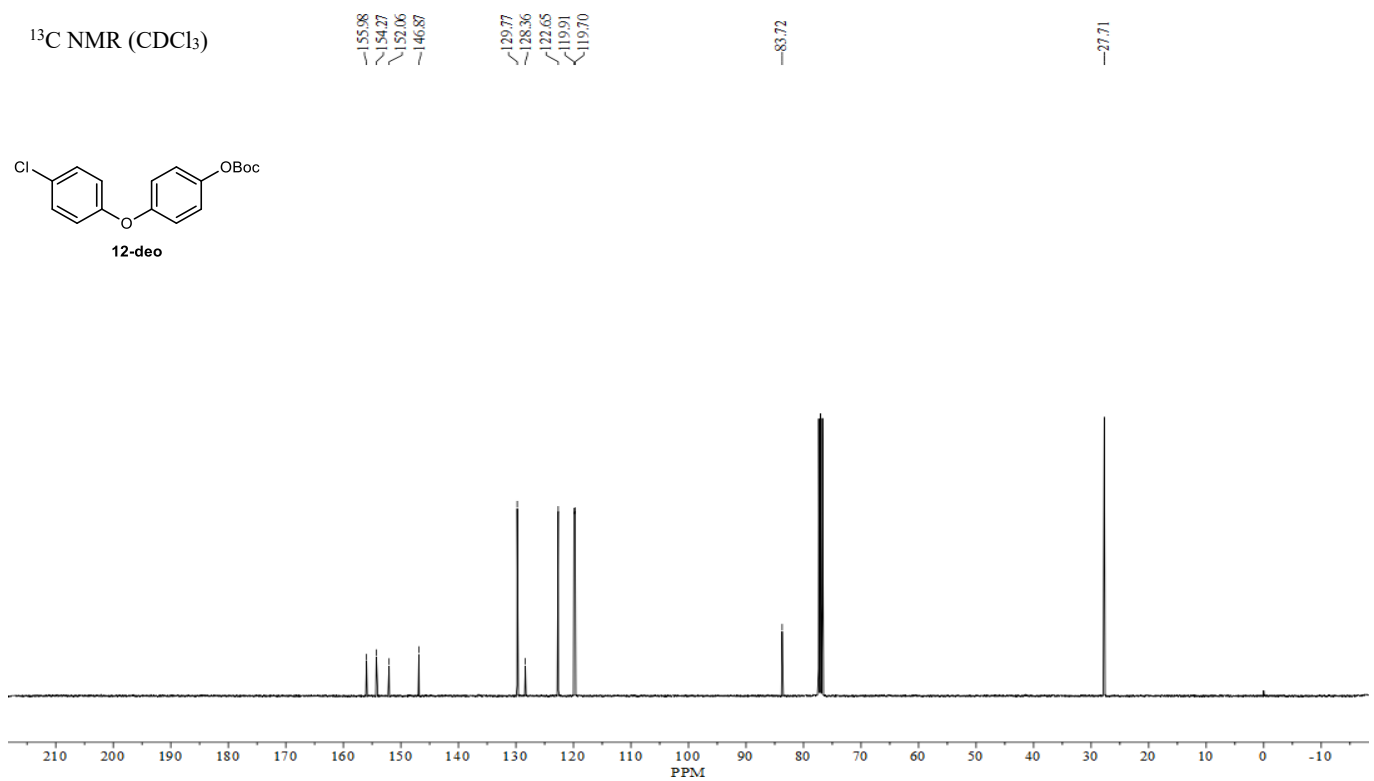

$^1\text{H}$  NMR ( $\text{CDCl}_3$ )

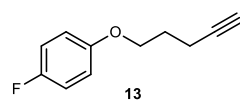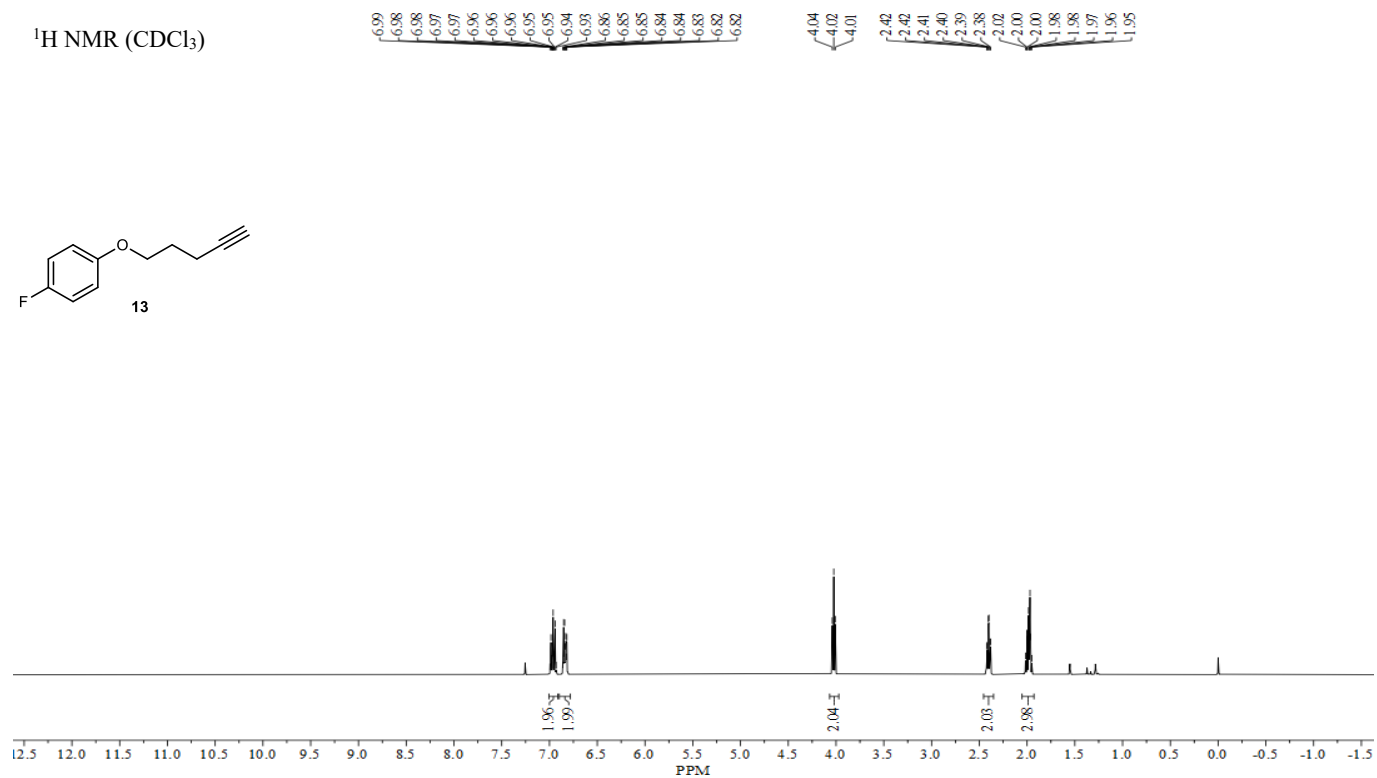

$^{13}\text{C}$  NMR ( $\text{CDCl}_3$ )

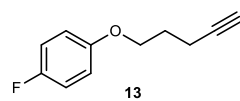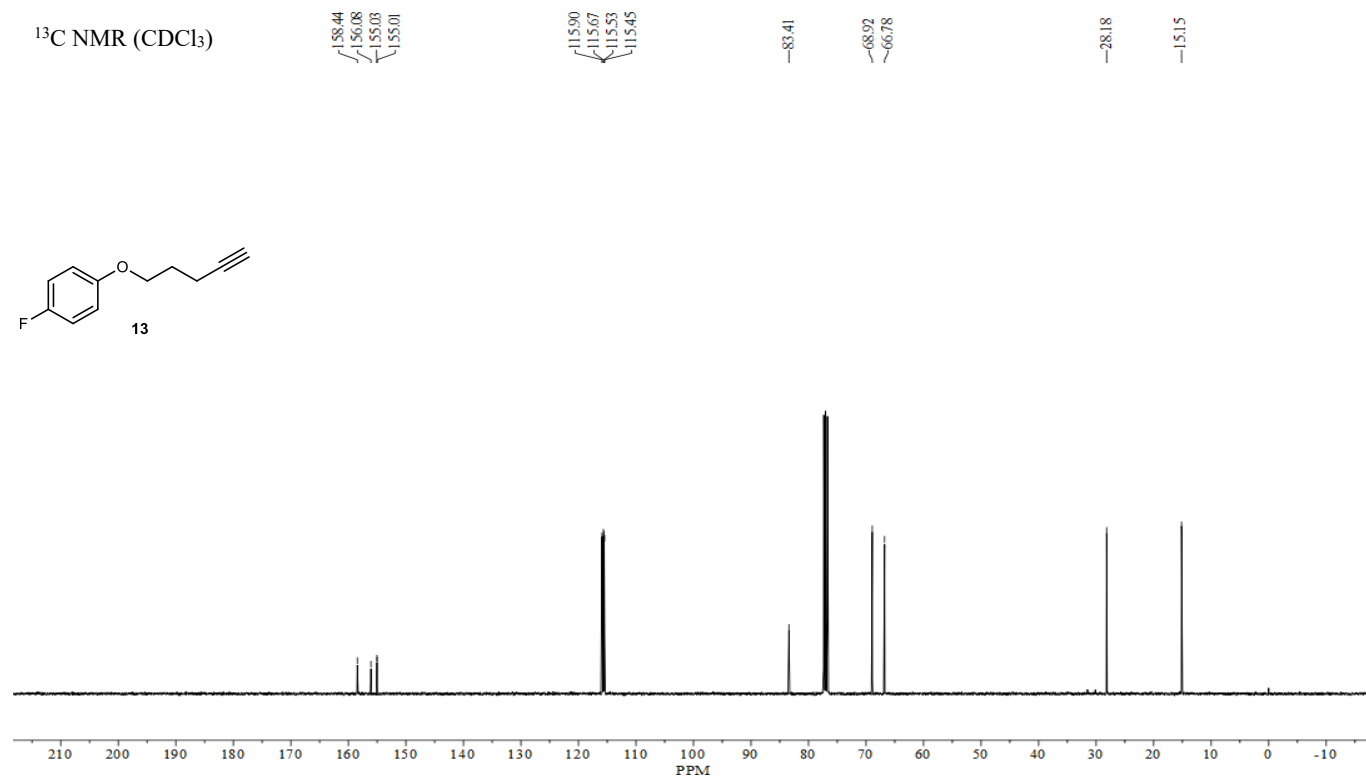

$^{19}\text{F}$  NMR ( $\text{CDCl}_3$ )

-124.09

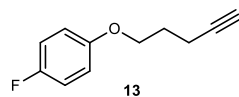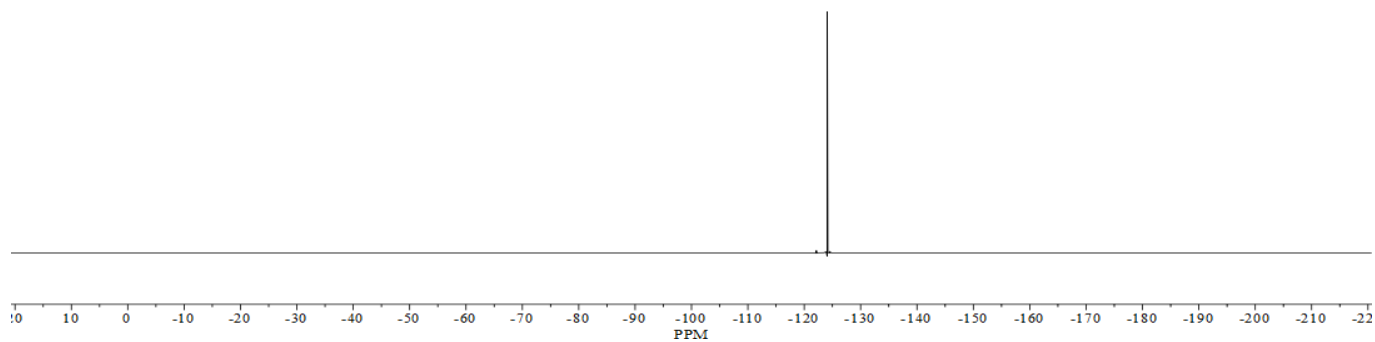

$^1\text{H}$  NMR ( $\text{CDCl}_3$ )

7.26, 7.25, 7.24, 7.23, 7.23, 6.97, 6.96, 6.95, 6.94, 6.93, 6.90, 6.89, 6.88, 6.88, 6.87, 6.87, 6.85, 6.85, 4.07, 4.05, 4.04, 2.44, 2.43, 2.42, 2.41, 2.40, 2.40, 2.04, 2.02, 2.00, 1.99, 1.98, 1.98, 1.97

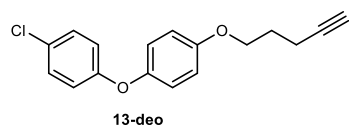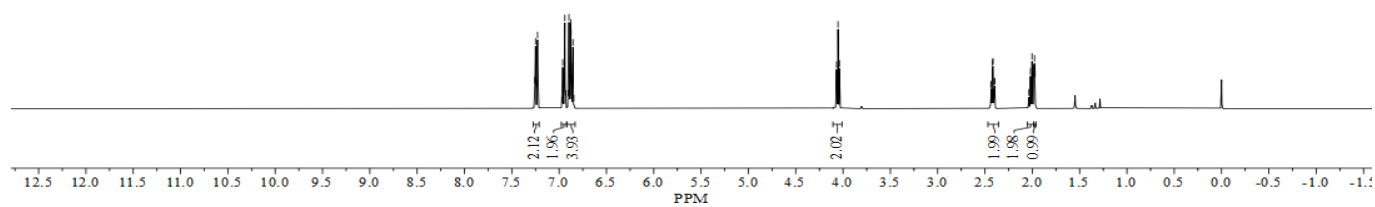

$^{13}\text{C}$  NMR ( $\text{CDCl}_3$ )

157.21  
155.46  
149.85

129.55  
127.37  
120.83  
118.79  
115.64

83.45

68.92  
66.63

28.21

15.19

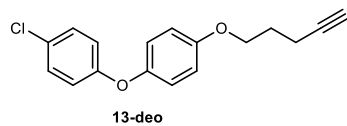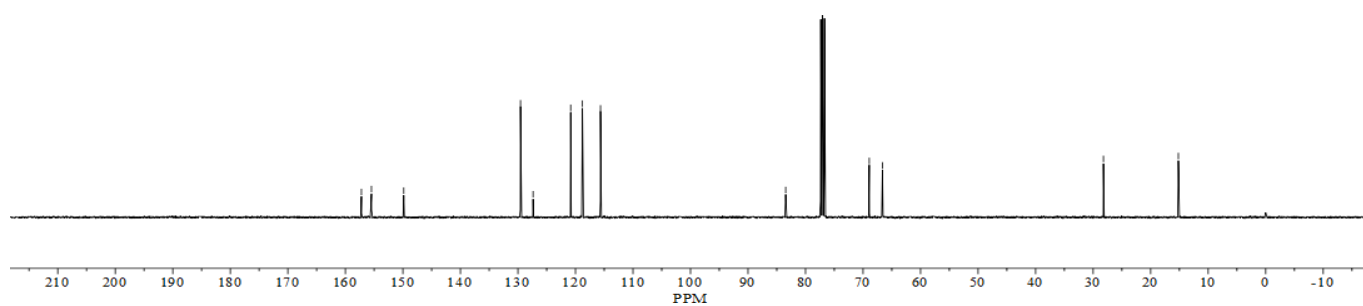

$^1\text{H}$  NMR ( $\text{CDCl}_3$ )

7.02  
7.01  
7.00  
6.99  
6.99  
6.98  
6.97  
6.96  
6.95  
6.89  
6.88  
6.87  
6.86  
6.85  
4.12  
4.12  
4.11  
4.10  
3.59  
3.58  
3.56

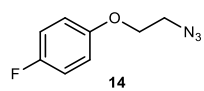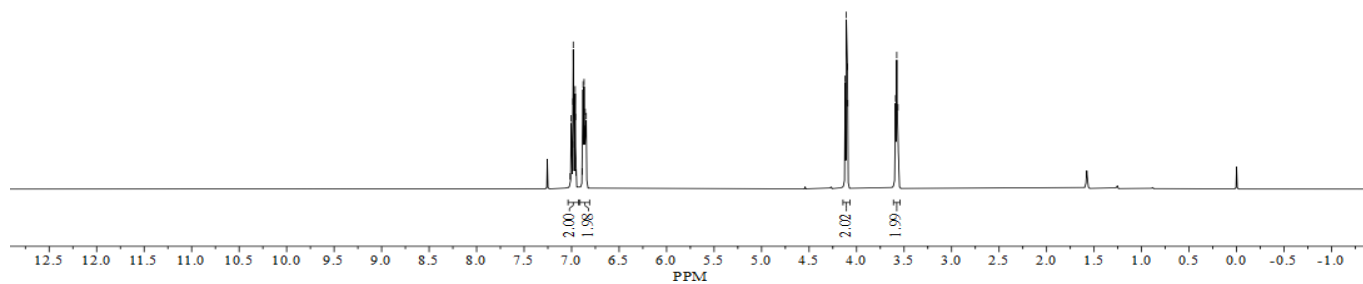

$^{13}\text{C}$  NMR ( $\text{CDCl}_3$ )

158.81  
156.44  
154.39  
154.37

116.07  
115.84  
115.76  
115.68

-67.67

-50.18

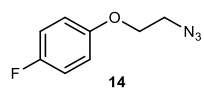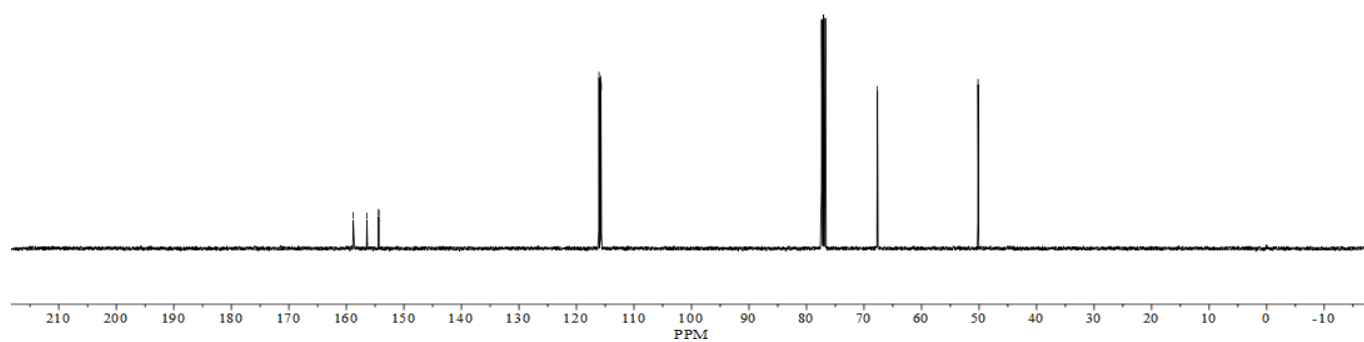

$^{19}\text{F}$  NMR ( $\text{CDCl}_3$ )

-123.12

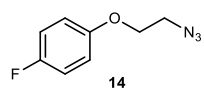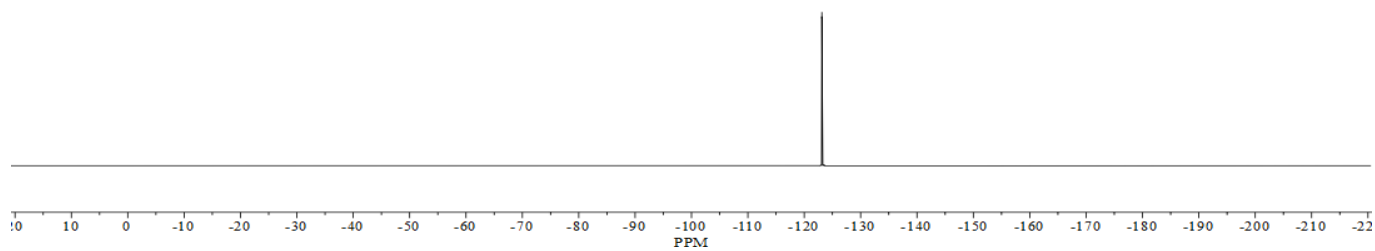

<sup>1</sup>H NMR (CDCl<sub>3</sub>)

7.27, 7.26, 7.24, 7.24, 7.23, 6.98, 6.97, 6.95, 6.95, 6.93, 6.92, 6.91, 6.89, 6.88, 6.88, 6.86, 6.85, 4.15, 4.13, 3.61, 3.59, 3.58

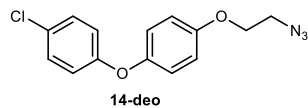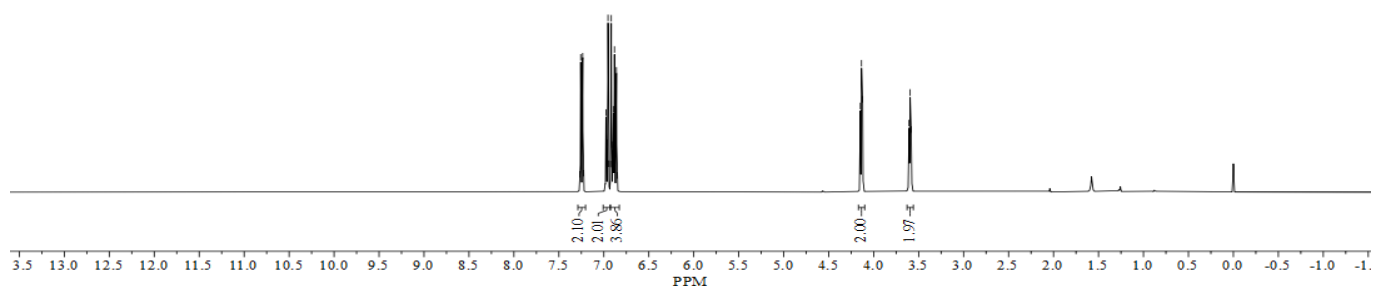

<sup>13</sup>C NMR (CDCl<sub>3</sub>)

157.01, 154.74, 150.45, 129.61, 127.55, 120.82, 118.94, 115.84, 67.53, 50.21

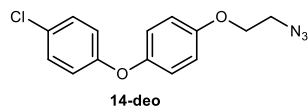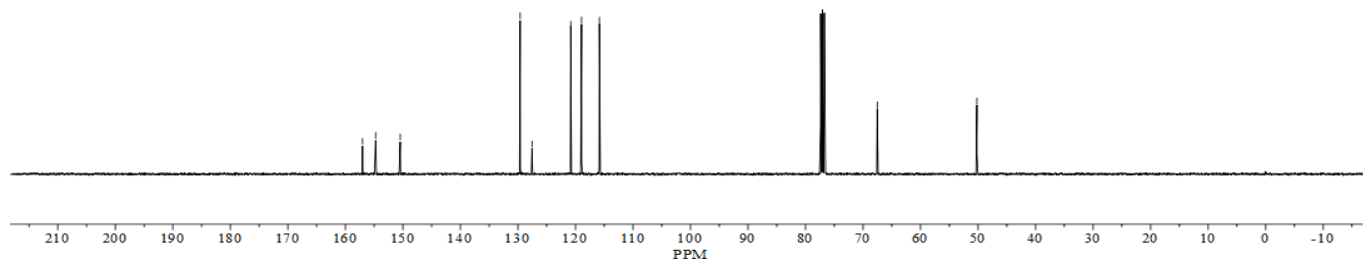

$^1\text{H}$  NMR ( $\text{CDCl}_3$ )

7.02, 7.00, 6.99, 6.97, 6.86, 6.85, 6.84, 6.83, 6.78, 6.77, 6.76, 6.75, 6.74, -4.22, -3.83

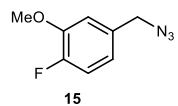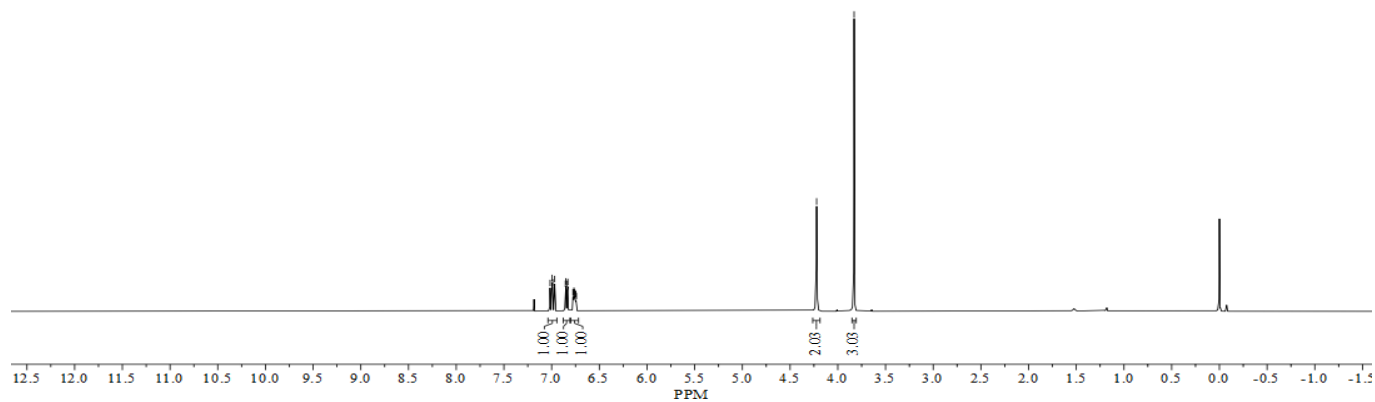

$^{13}\text{C}$  NMR ( $\text{CDCl}_3$ )

152.40, 150.04, 146.96, 146.85, 130.71, 130.67, 119.61, 119.54, 115.26, 115.08, 112.24, 112.22, 55.22, 53.41

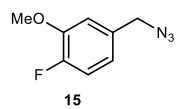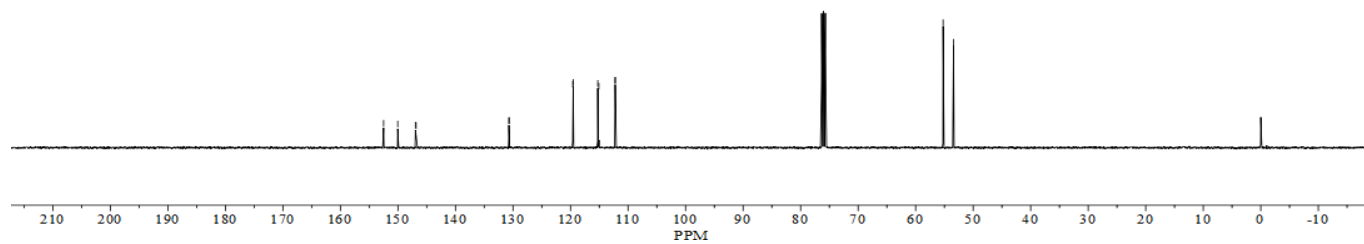

$^{19}\text{F}$  NMR ( $\text{CDCl}_3$ )

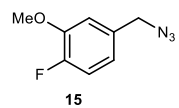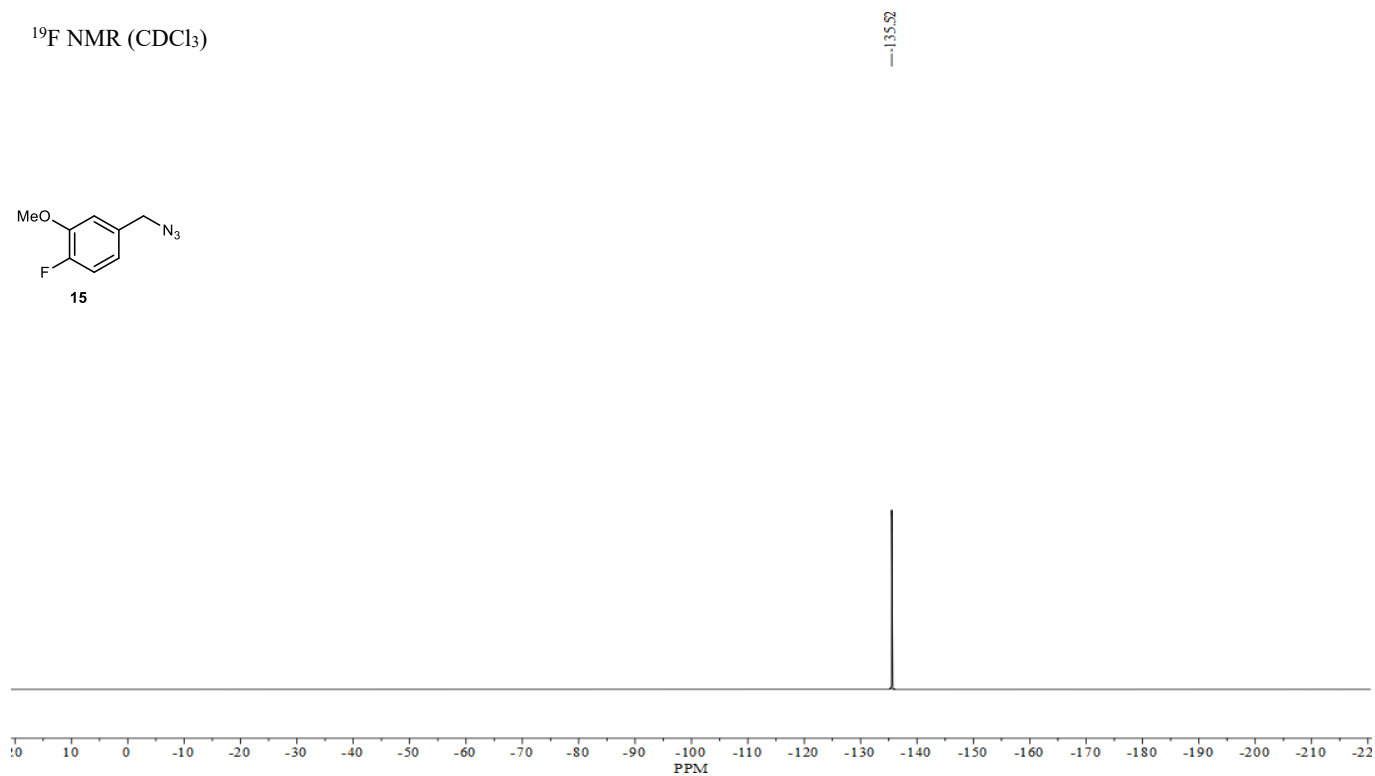

$^1\text{H}$  NMR ( $\text{CDCl}_3$ )

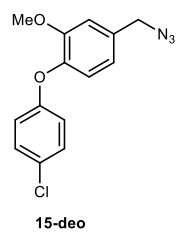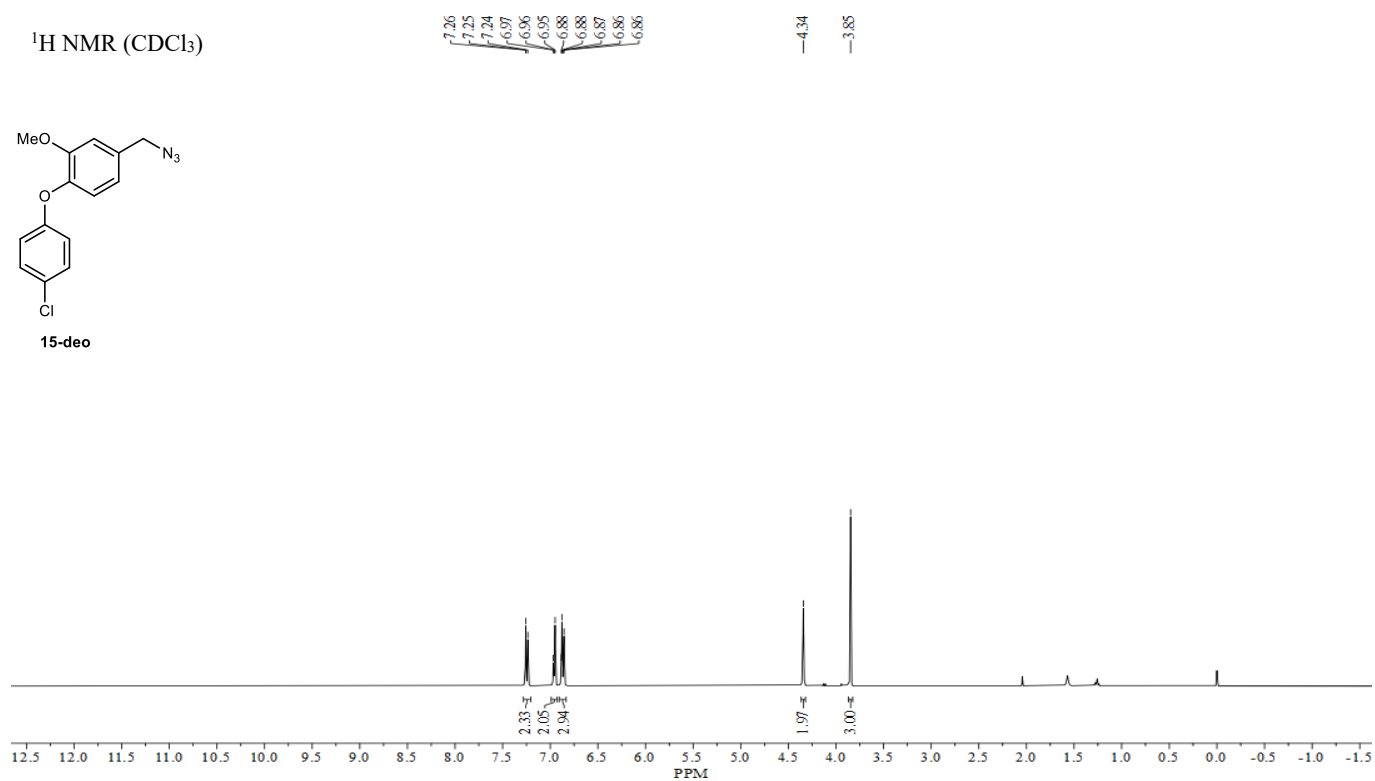



$^{13}\text{C}$  NMR ( $\text{CDCl}_3$ )

156.38  
151.54  
144.71  
132.50  
129.53  
127.65  
121.08  
120.88  
118.47  
112.63  
56.03  
54.62

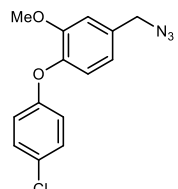

15-deo

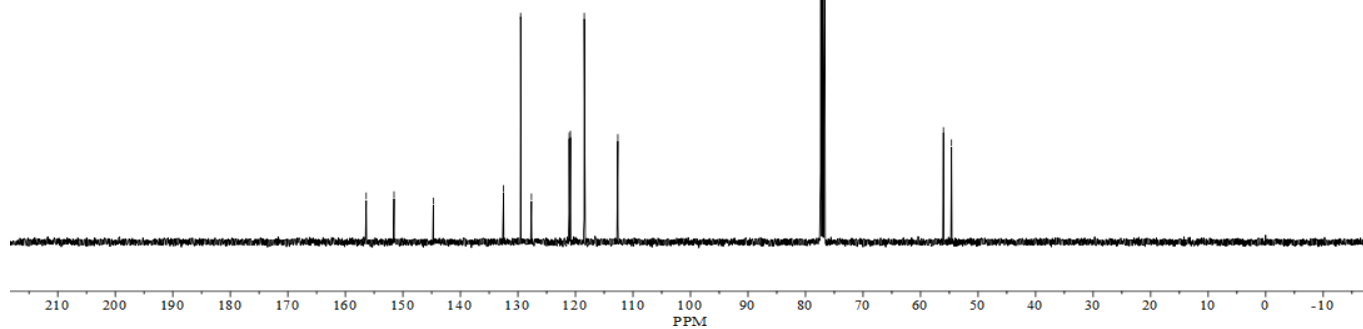

$^1\text{H}$  NMR ( $\text{CDCl}_3$ )

6.98  
6.97  
6.96  
6.95  
6.95  
6.94  
6.94  
6.93  
6.82  
6.81  
6.80  
6.80  
6.79  
6.78  
6.78  
6.70  
3.94  
3.93  
3.91  
3.76  
3.74  
3.72  
2.11  
2.09  
2.09  
2.08  
2.06  
2.06  
2.04

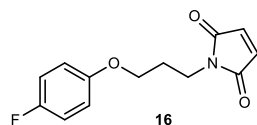

16

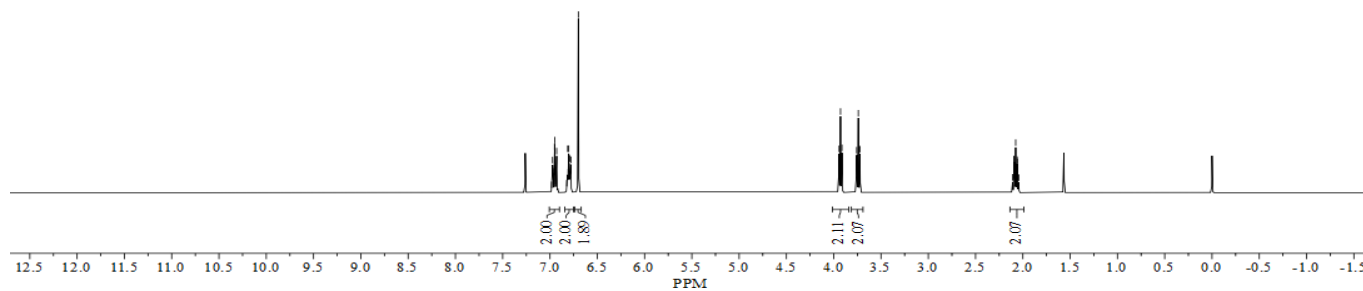

$\delta$  170.76, 158.52, 156.15, 154.84, 154.82, 134.19, 115.90, 115.67, 115.58, 115.50, 66.17, 35.32, 28.29

$^{13}\text{C}$  NMR ( $\text{CDCl}_3$ )

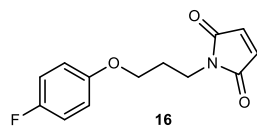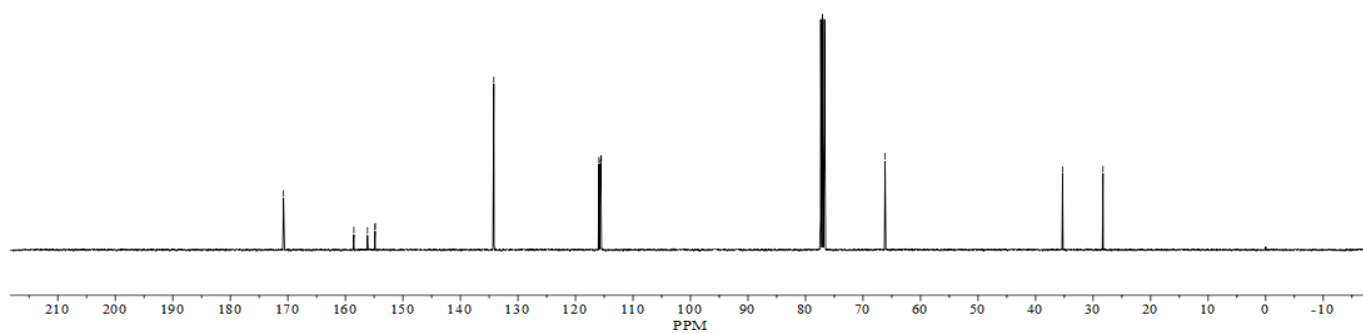

$^{19}\text{F}$  NMR ( $\text{CDCl}_3$ )

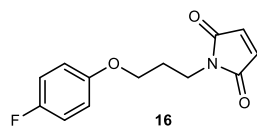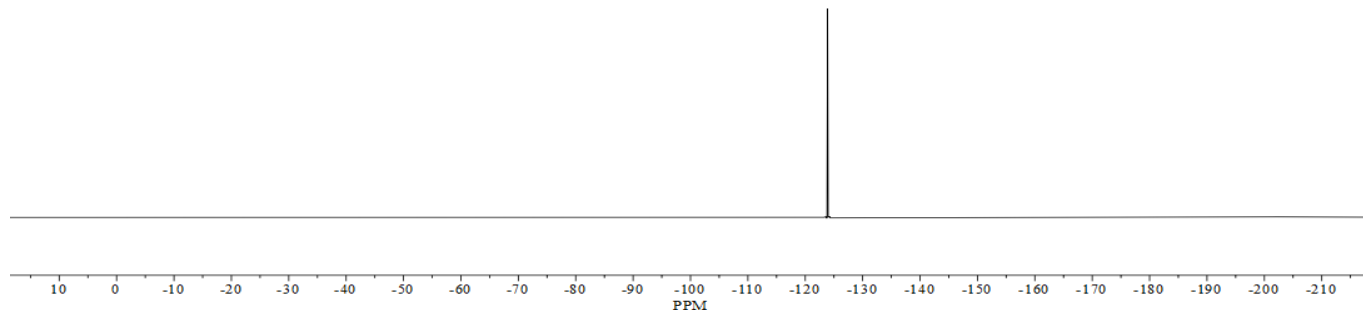

$^1\text{H}$  NMR ( $\text{CDCl}_3$ )

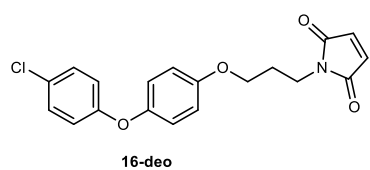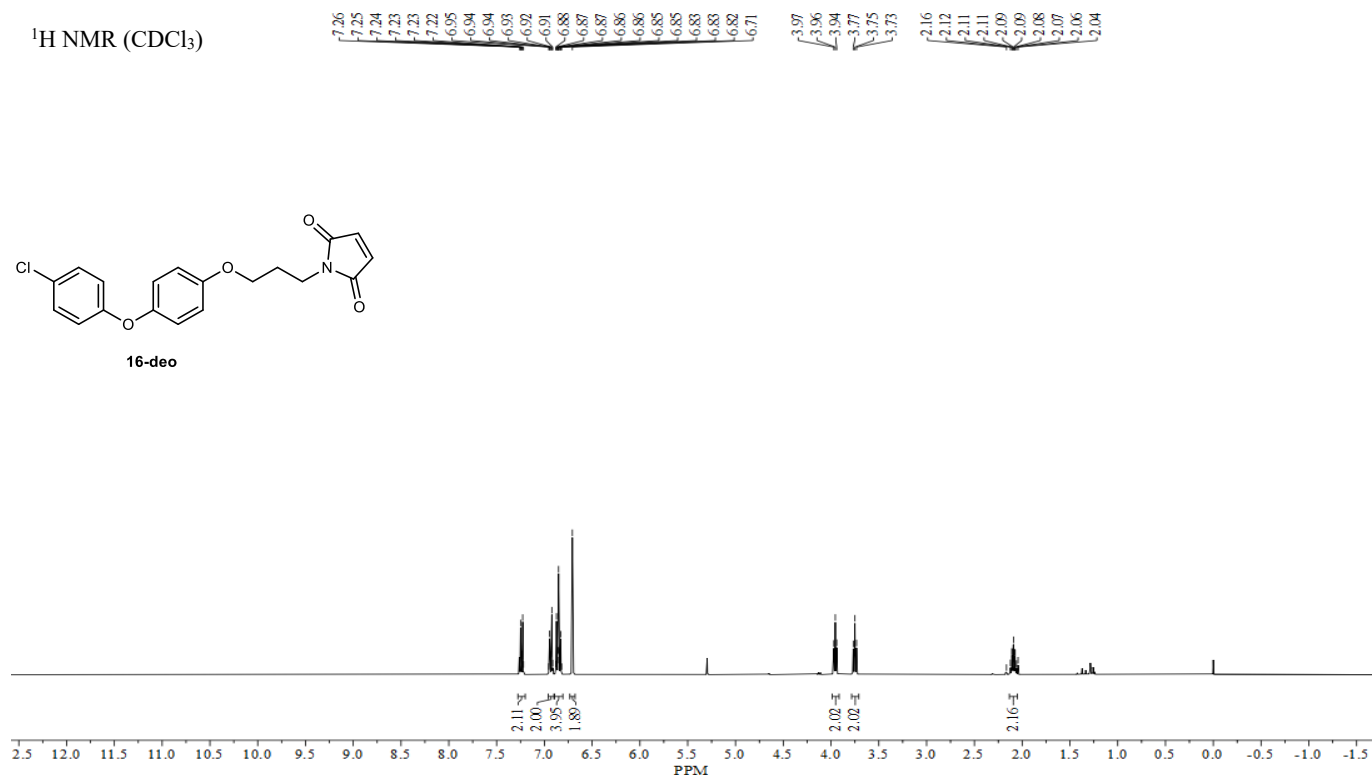

$^{13}\text{C}$  NMR ( $\text{CDCl}_3$ )

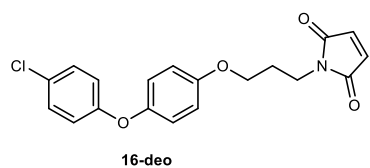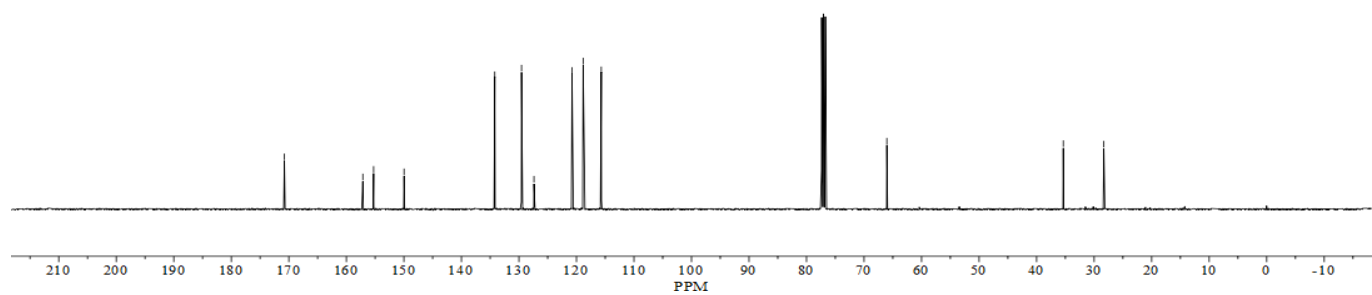

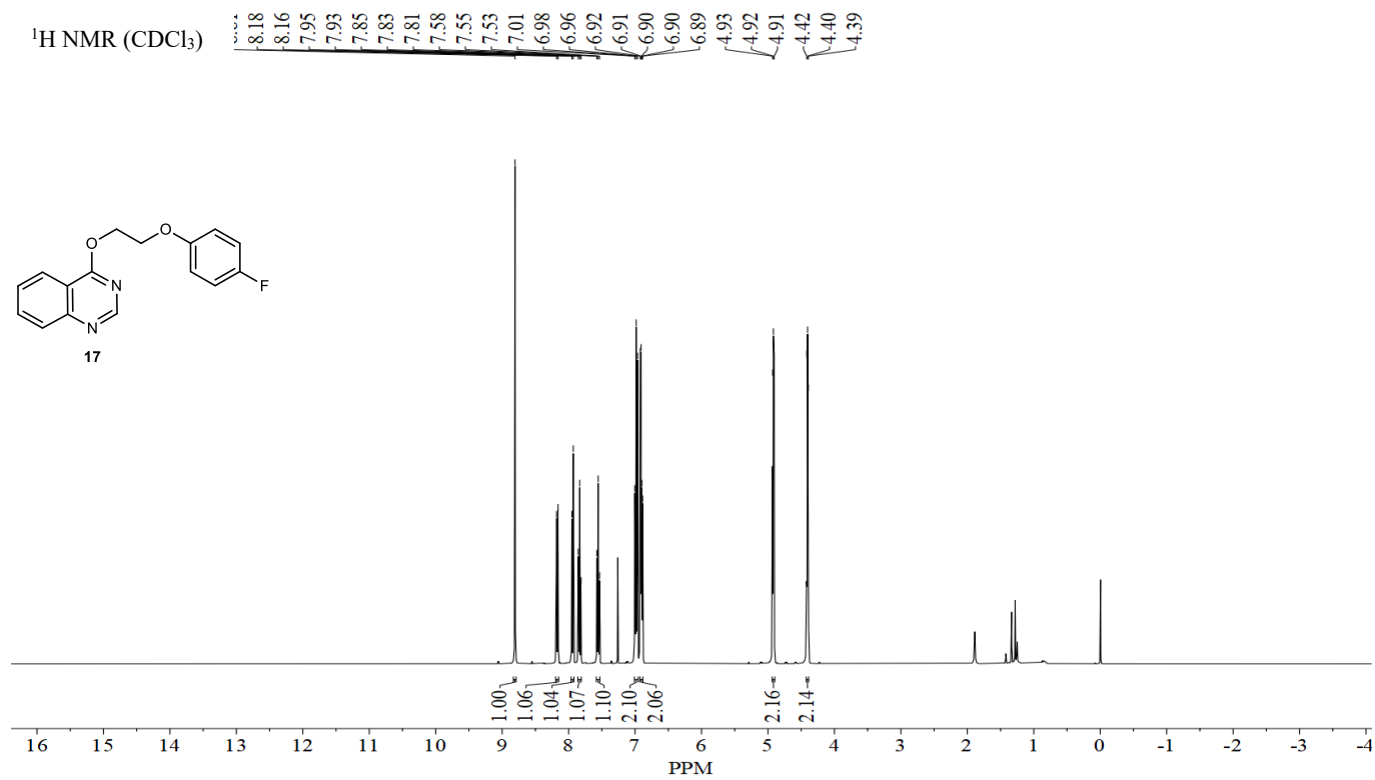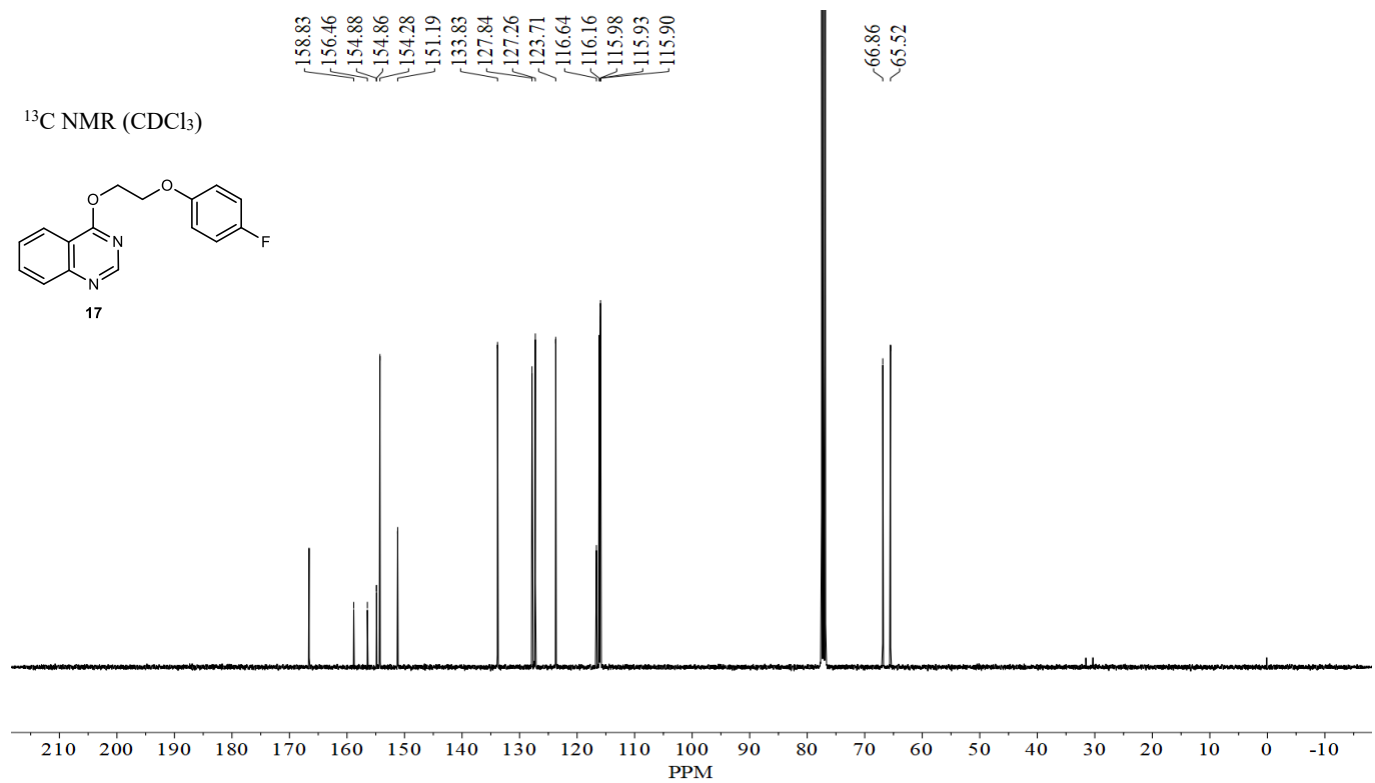

$^{19}\text{F}$  NMR ( $\text{CDCl}_3$ )

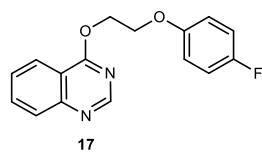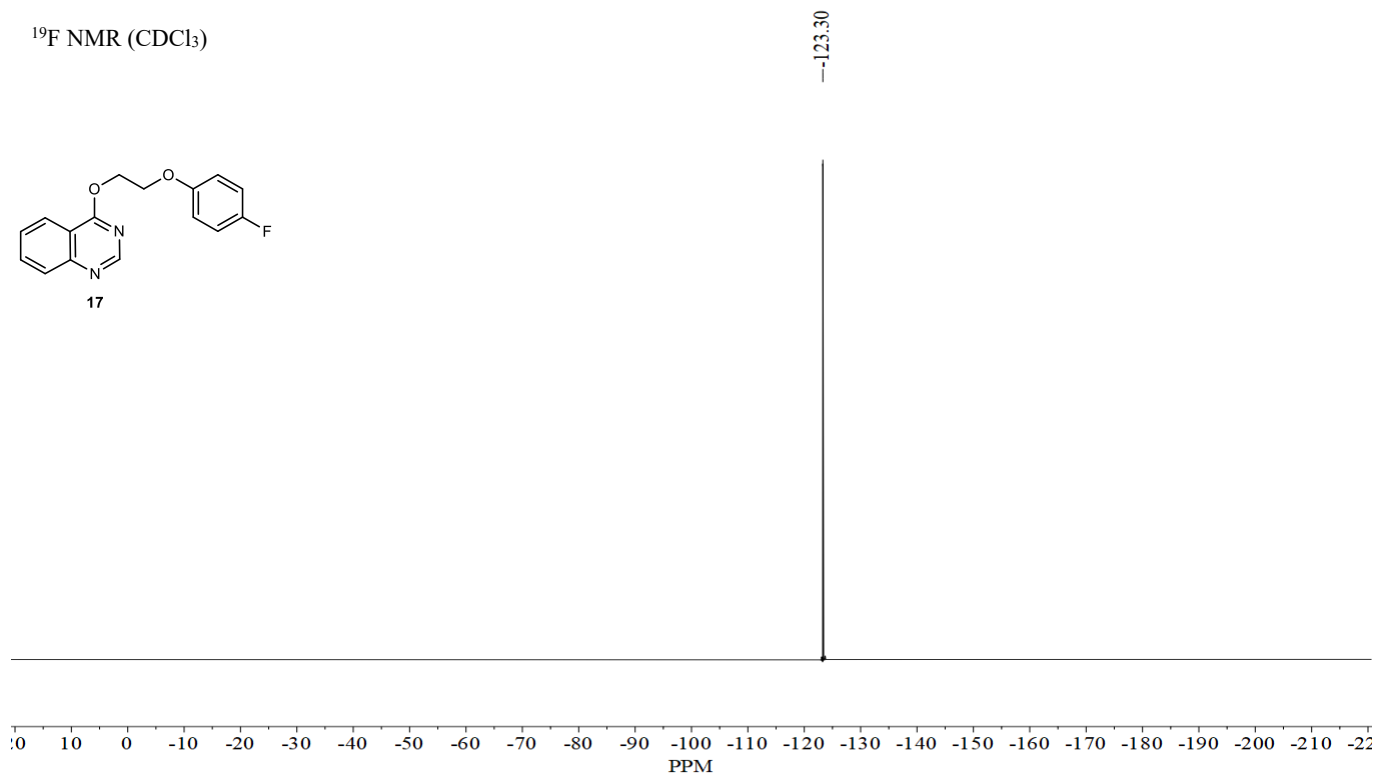

$^1\text{H}$  NMR ( $\text{CDCl}_3$ )

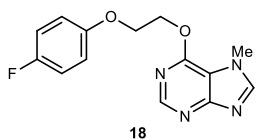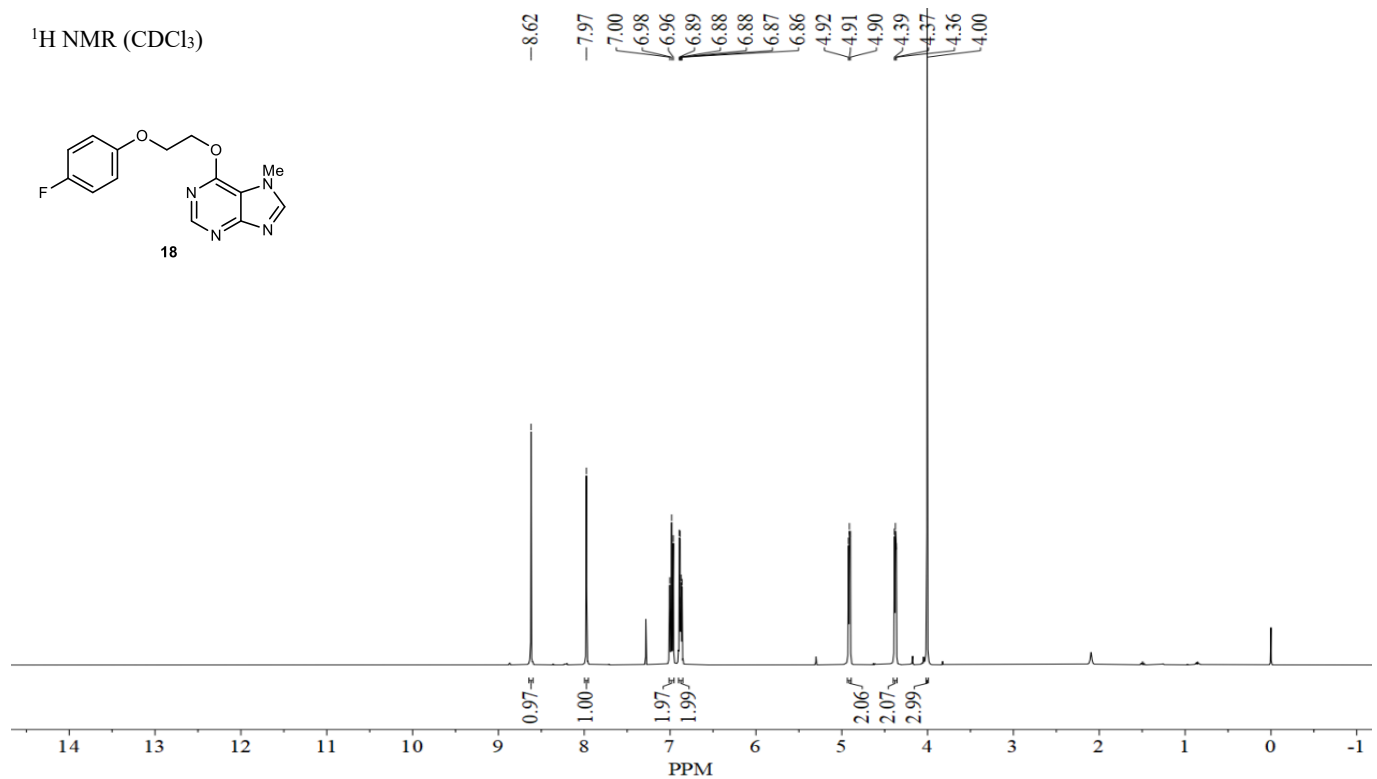

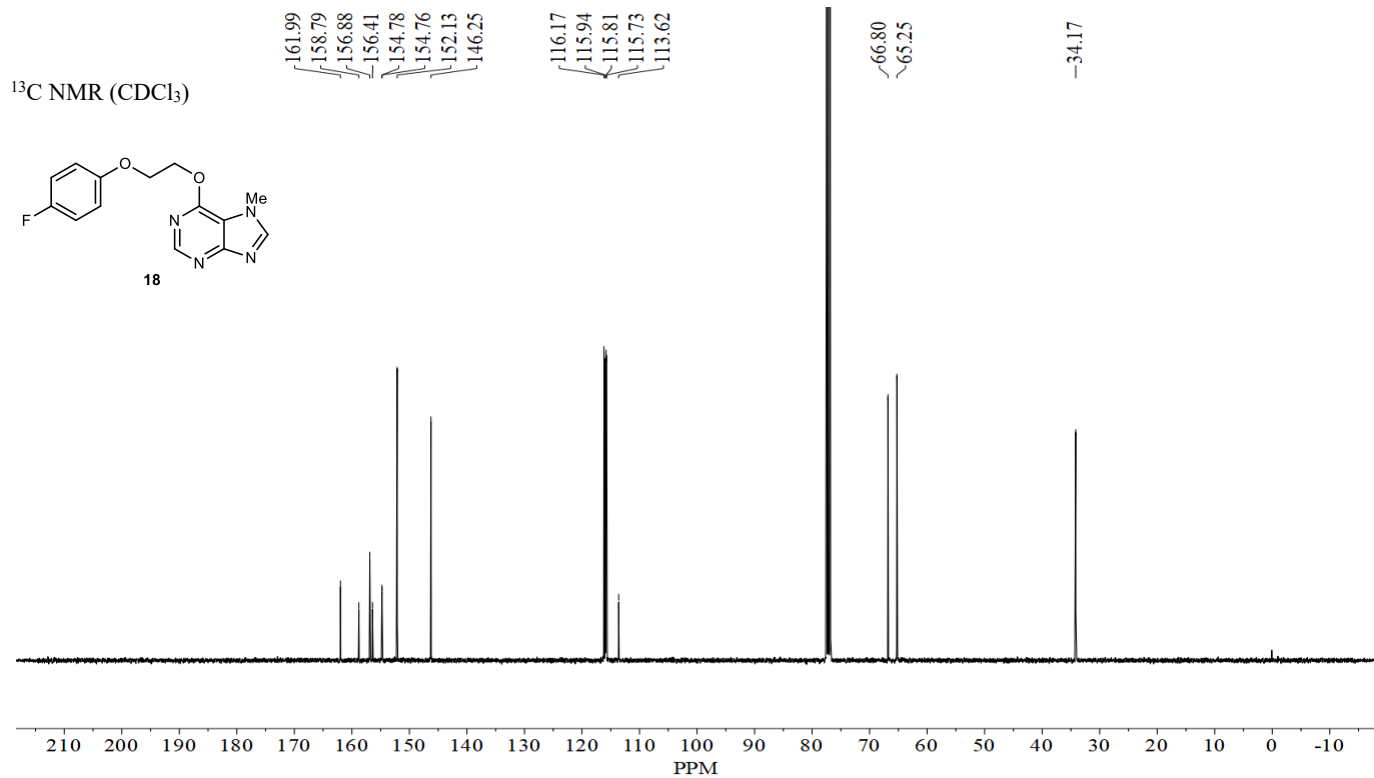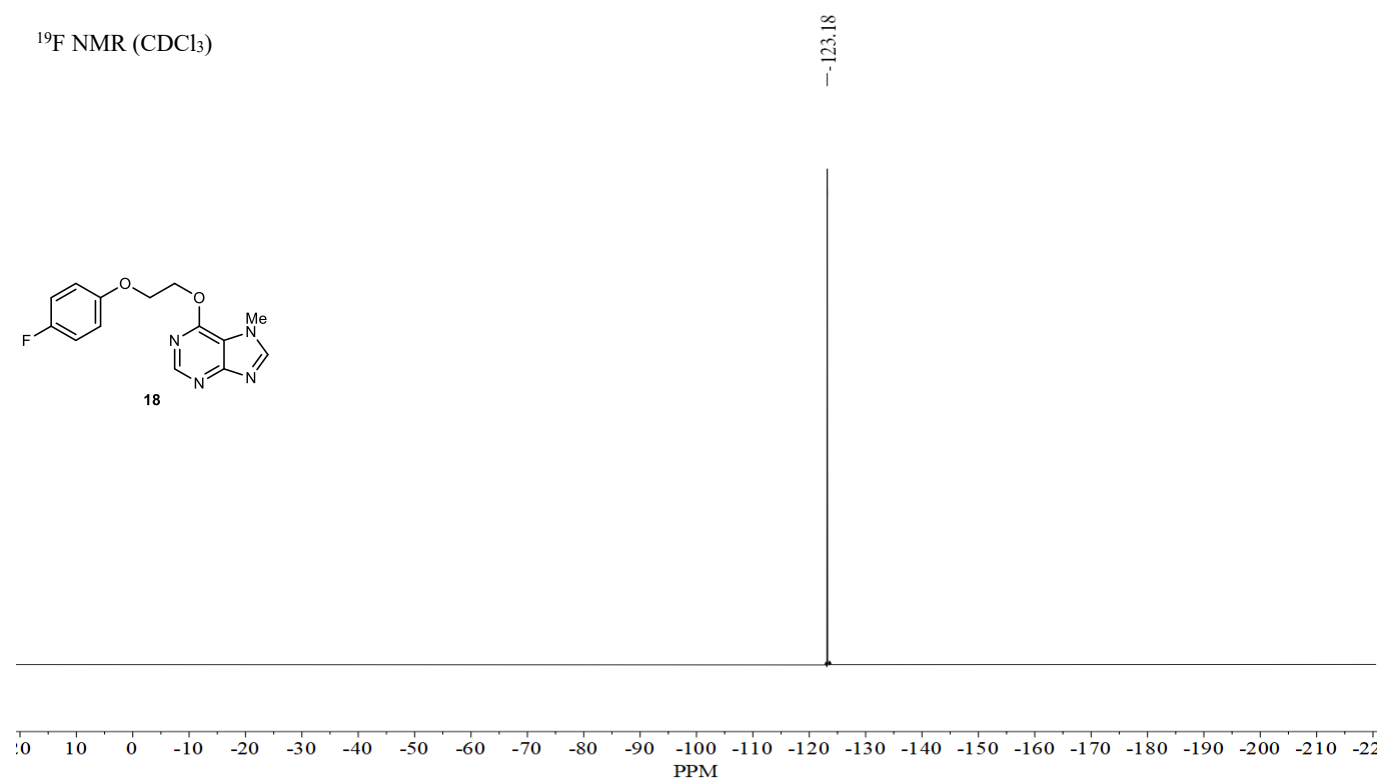

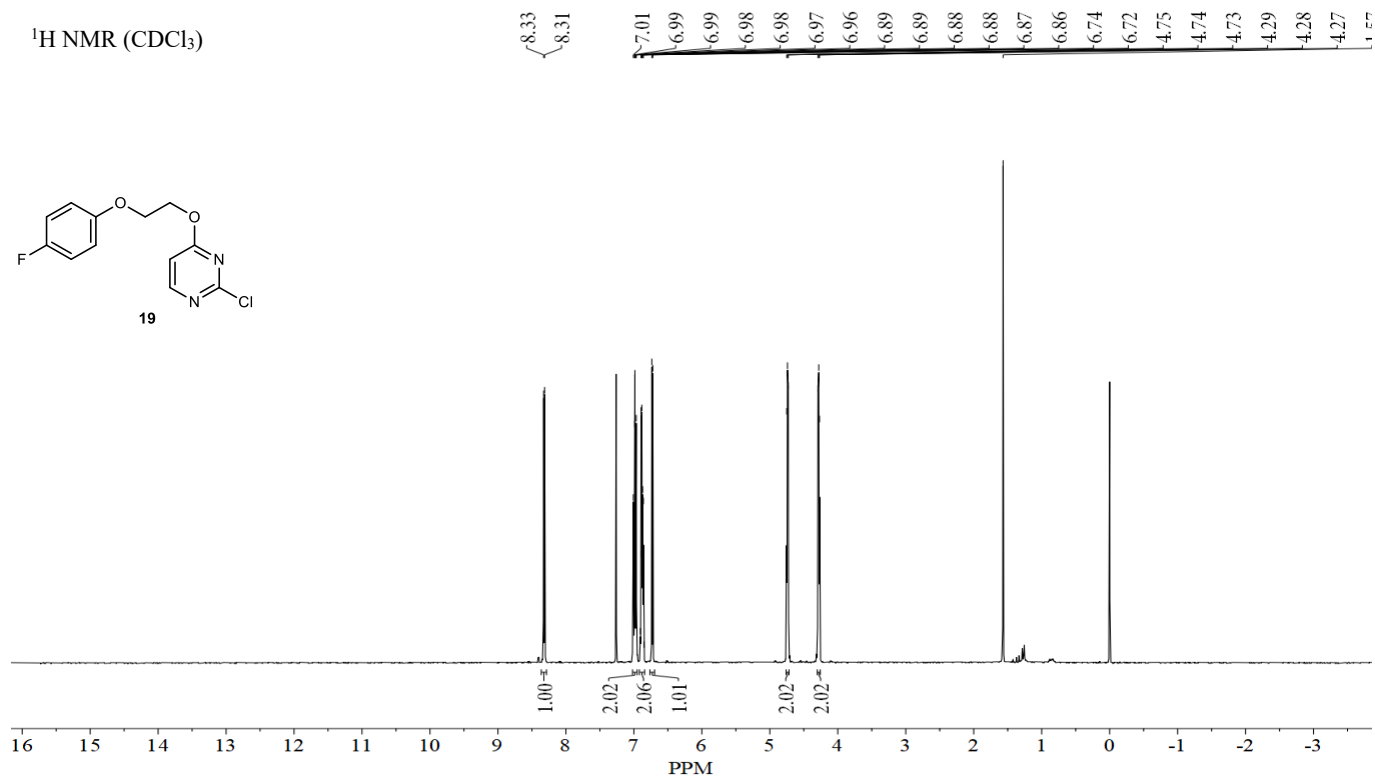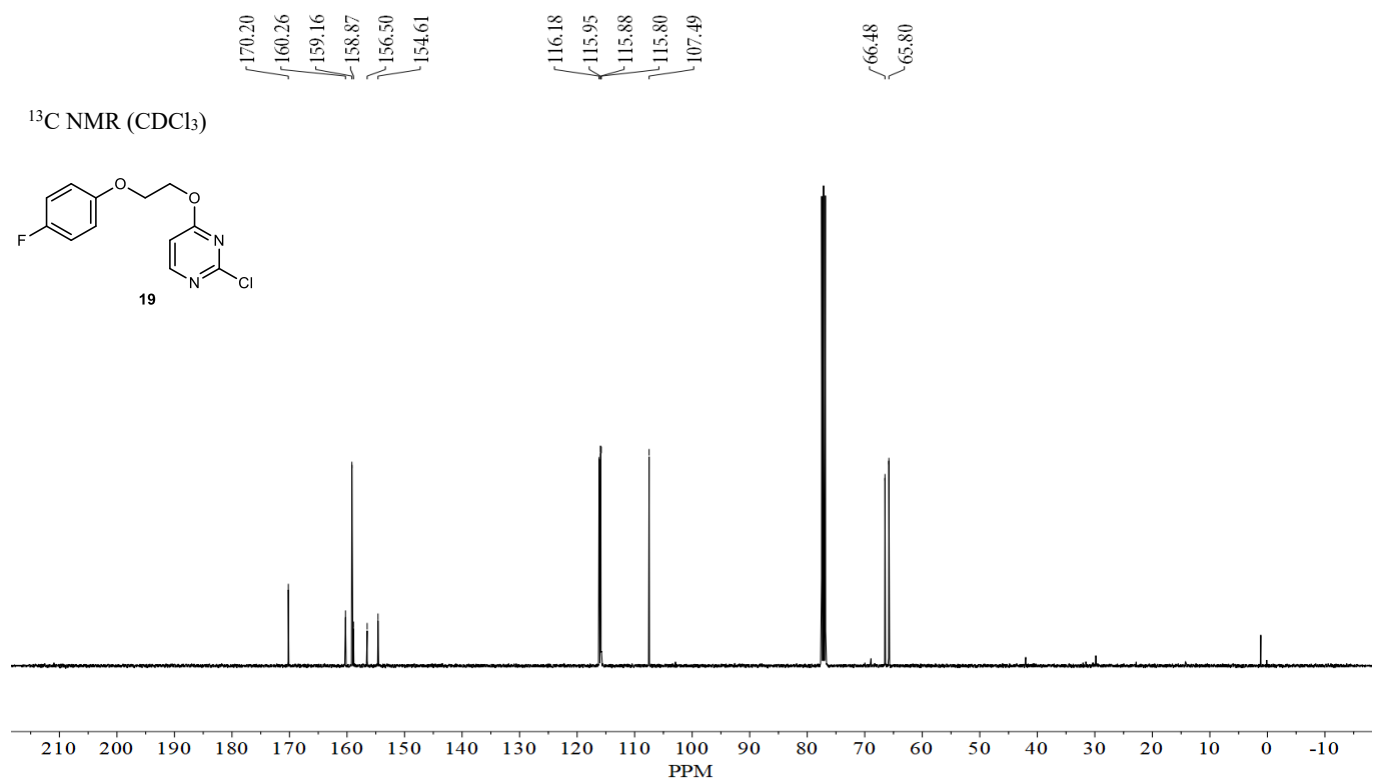

$^{19}\text{F}$  NMR ( $\text{CDCl}_3$ )

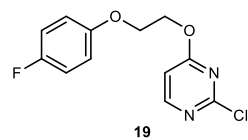

-123.17

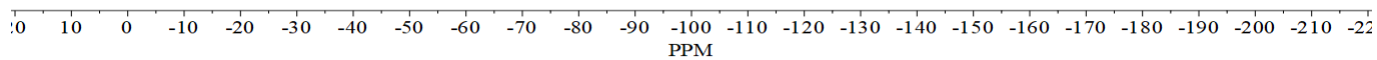

$^1\text{H}$  NMR ( $\text{CDCl}_3$ )

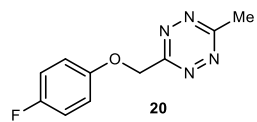

6.93  
6.93  
6.92  
6.92

5.54

3.03

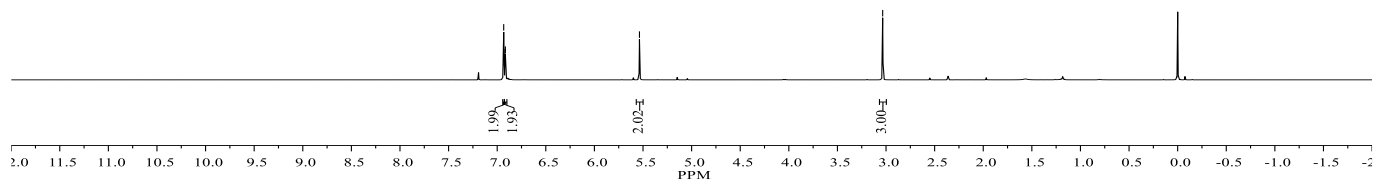



$^{13}\text{C}$  NMR ( $\text{CDCl}_3$ )

167.77  
164.49  
158.11  
155.72  
153.01  
152.98

115.29  
115.20  
114.97

67.49

20.31

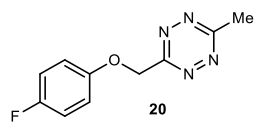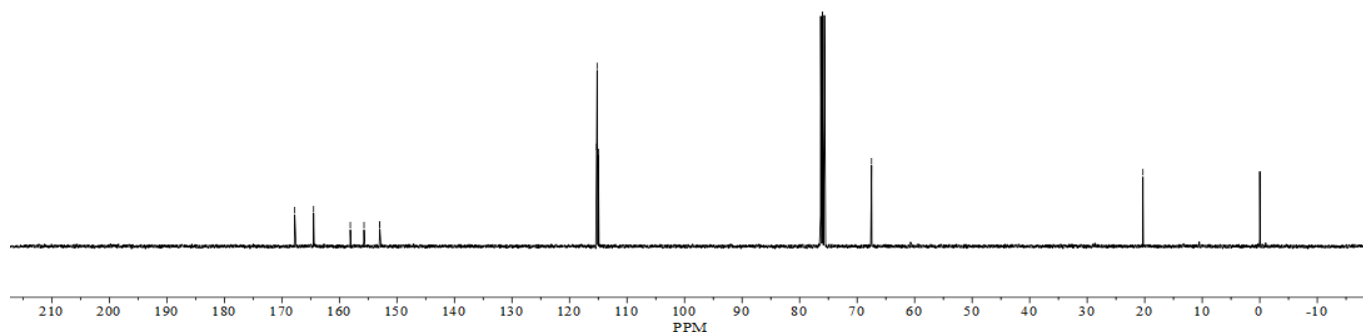

$^{19}\text{F}$  NMR ( $\text{CDCl}_3$ )

-122.18

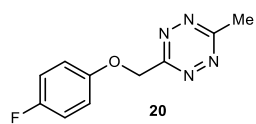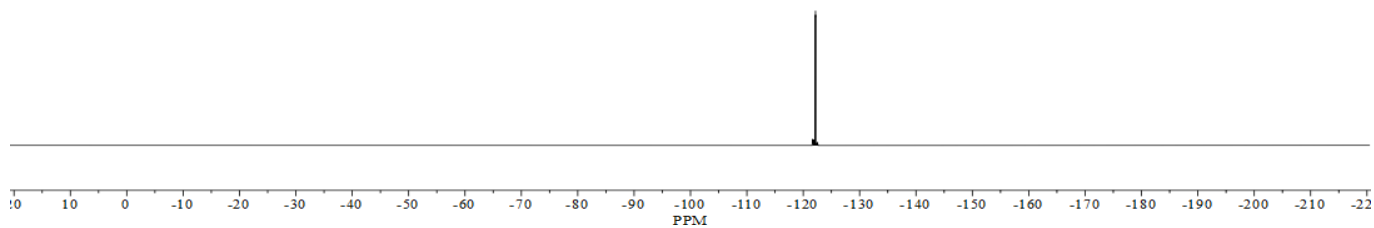

<sup>1</sup>H NMR (CDCl<sub>3</sub>)

8.52, 8.52, 8.51, 7.57, 7.56, 7.55, 7.55, 7.54, 7.54, 7.53, 7.53, 7.52, 7.51, 7.50, 7.49, 6.89, 6.89, 6.87, 6.86, 6.85, 6.84, 6.79, 6.78, 6.77, 6.76, 6.76, 6.75, 6.75, 4.55, 4.54, 4.52, 3.76, 3.75, 3.73

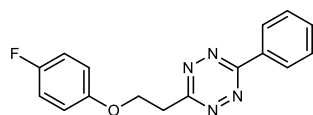

21

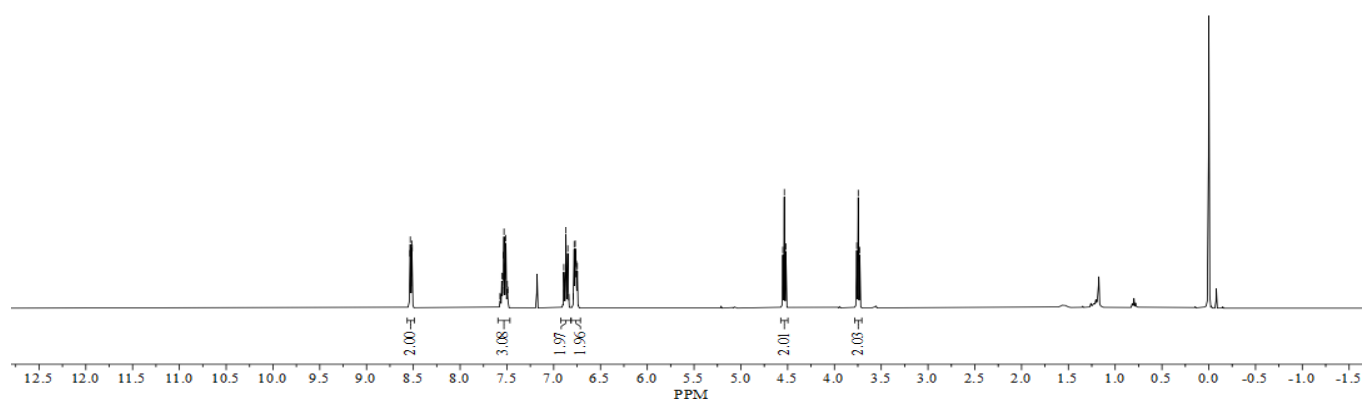

<sup>13</sup>C NMR (CDCl<sub>3</sub>)

166.38, 163.51, 157.68, 155.31, 153.45, 153.43, 131.75, 130.61, 128.26, 127.03, 114.96, 114.83, 114.75, 114.73, 64.83, 33.97

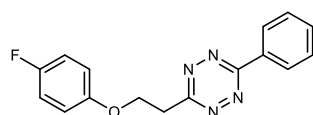

21

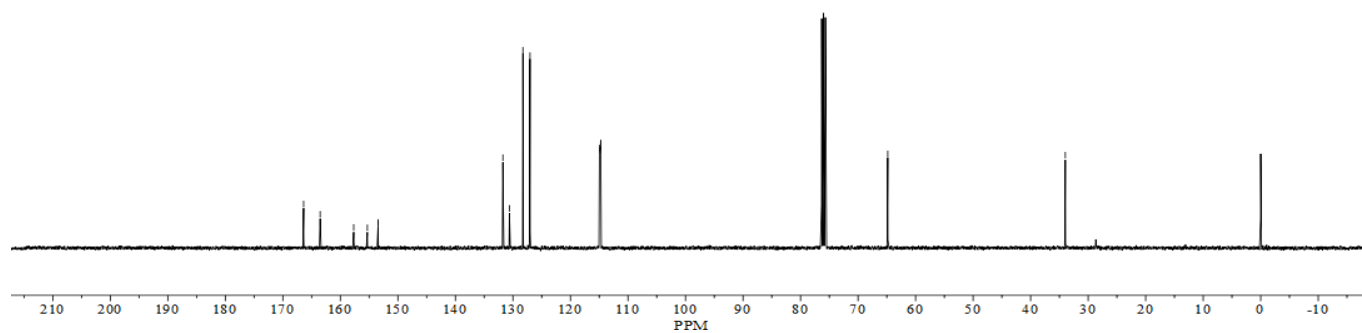

$^{19}\text{F}$  NMR ( $\text{CDCl}_3$ )

—123.25

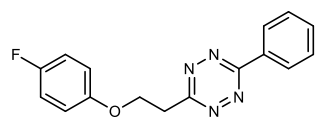

21

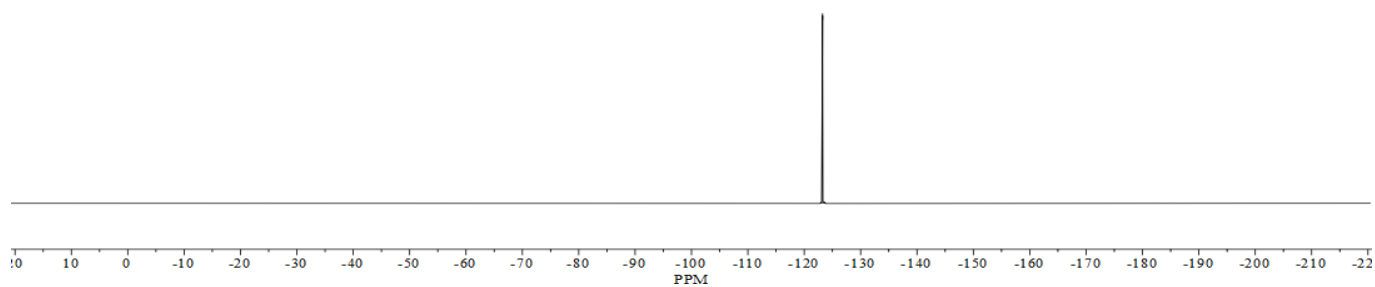

$^1\text{H}$  NMR ( $\text{CDCl}_3$ )

7.28  
7.57  
7.56  
7.55  
7.54  
7.14  
7.12  
7.11  
7.10

—1.36

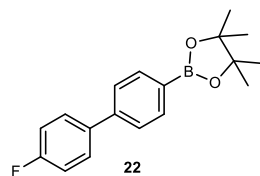

22

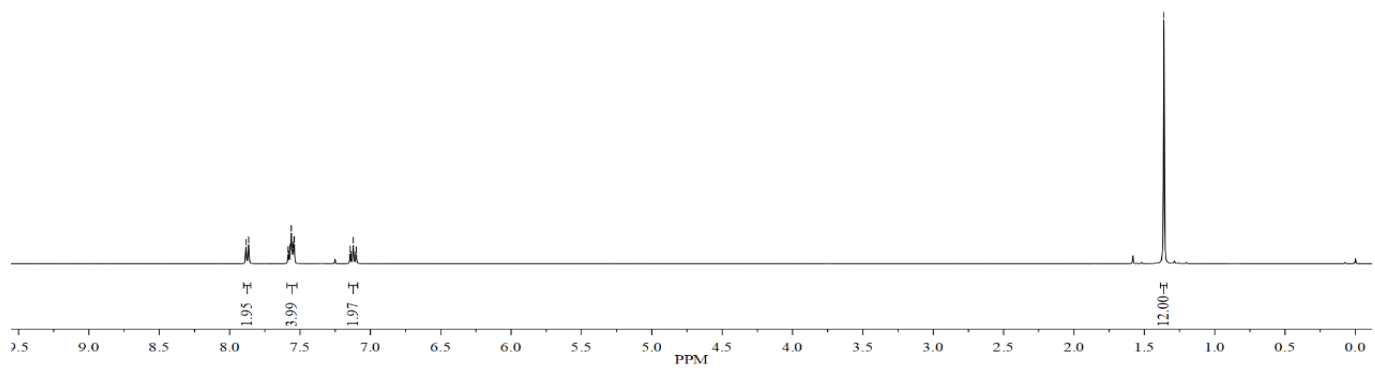

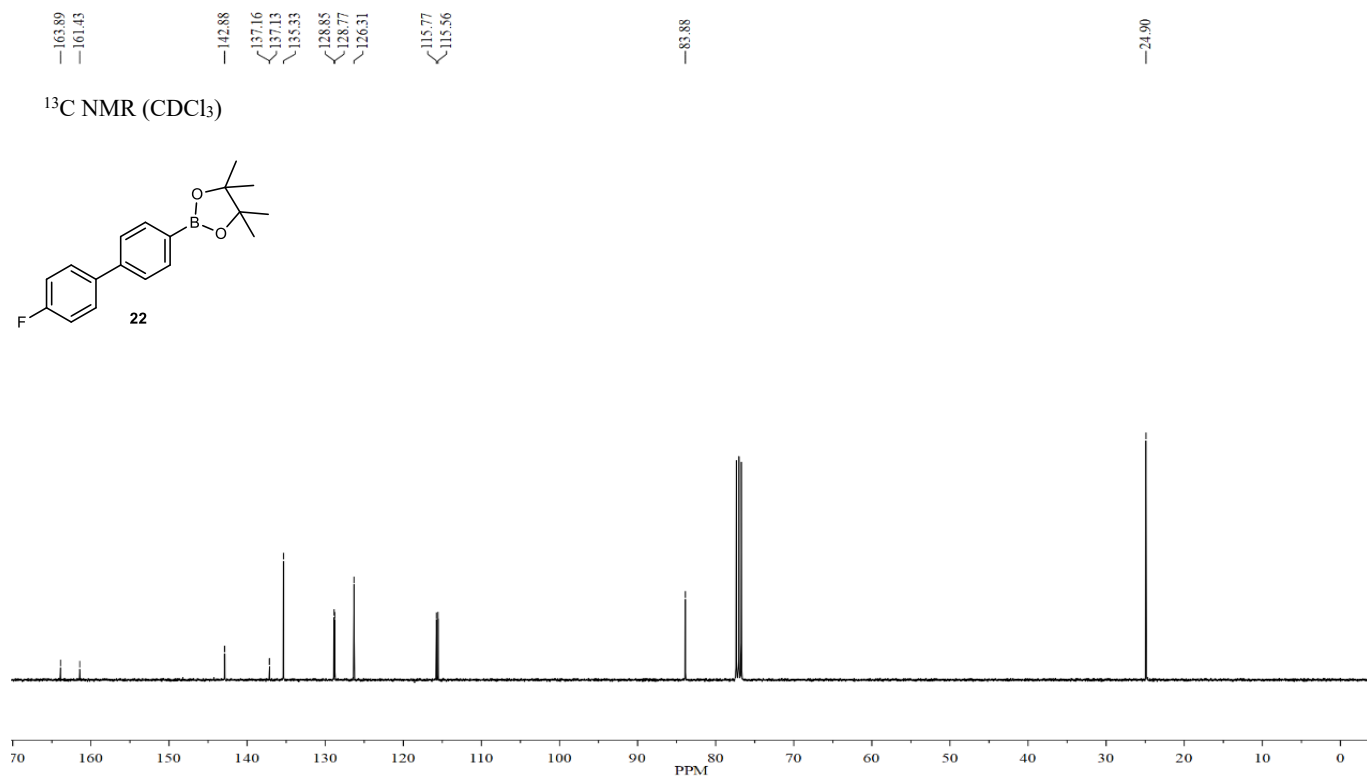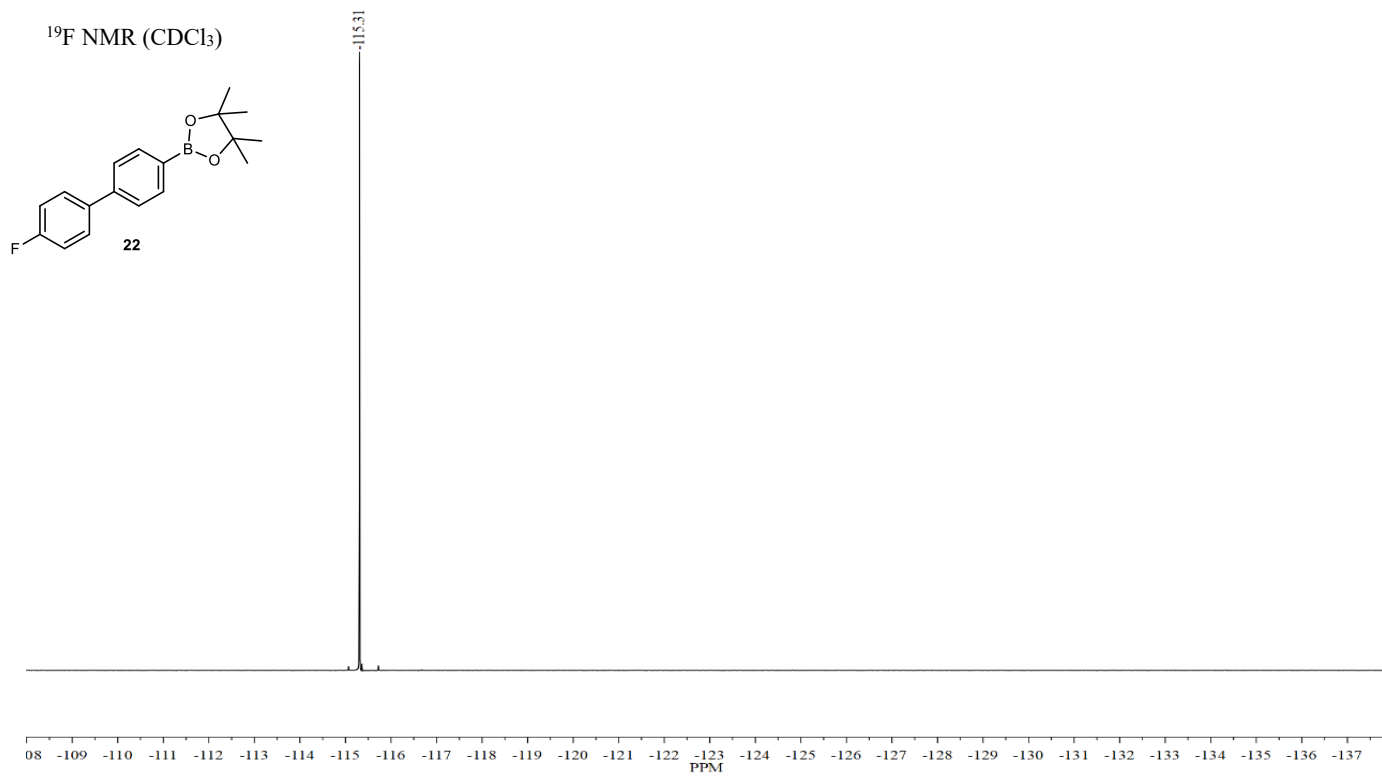

$^1\text{H}$  NMR ( $\text{CDCl}_3$ )

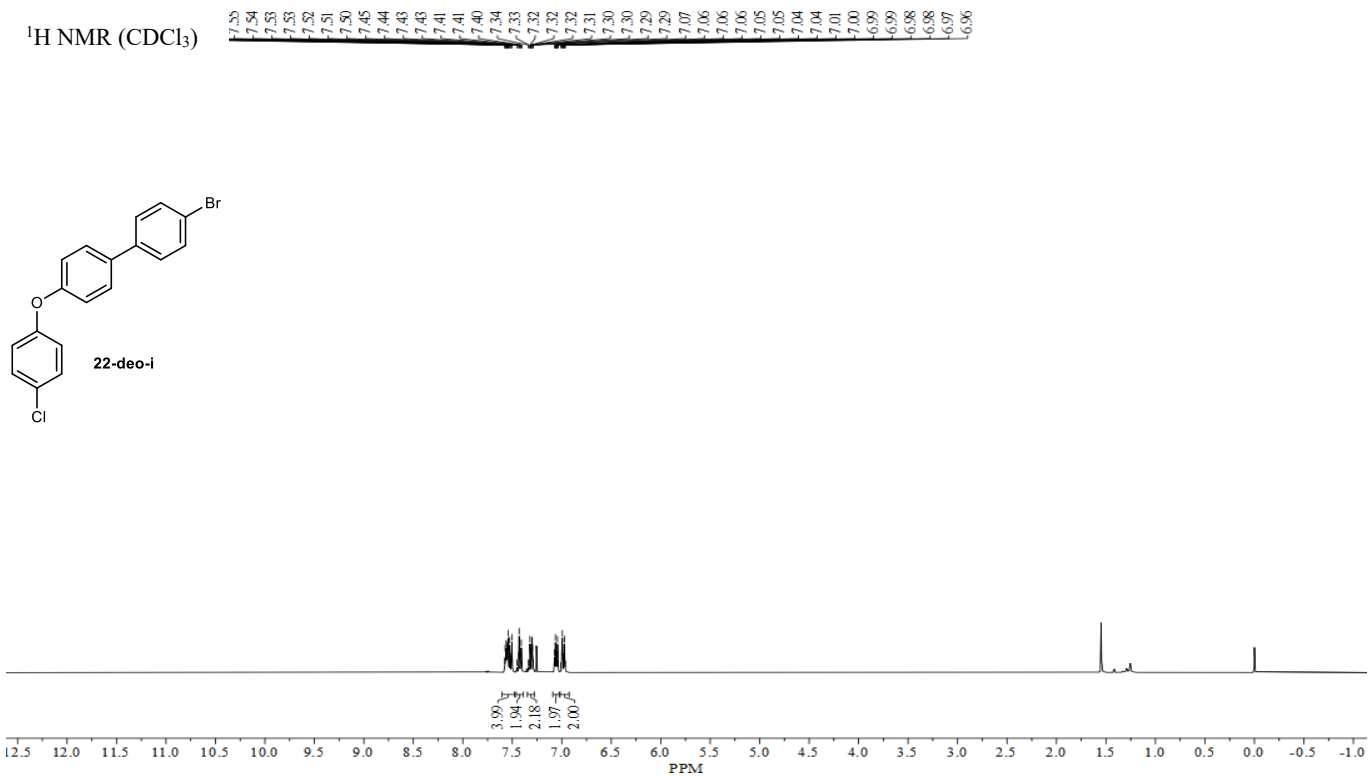

$^{13}\text{C}$  NMR ( $\text{CDCl}_3$ )

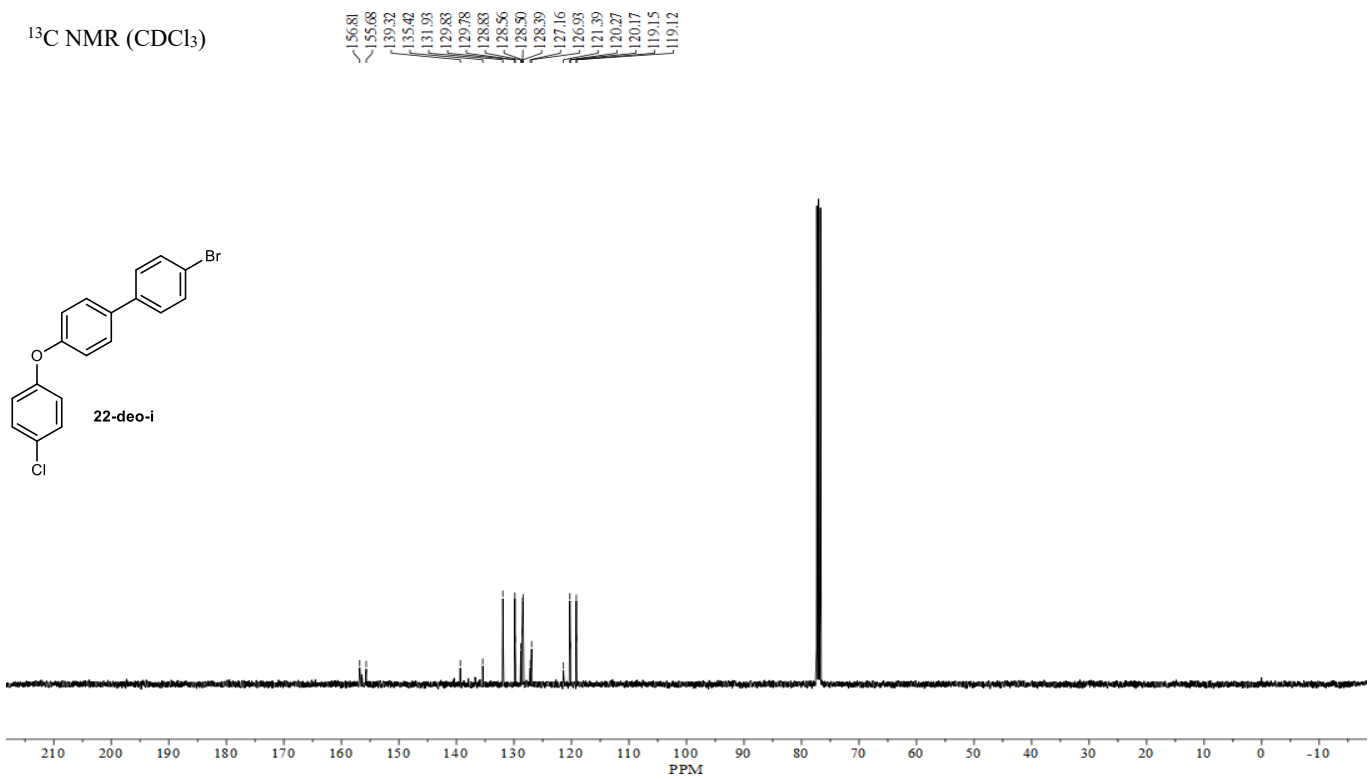

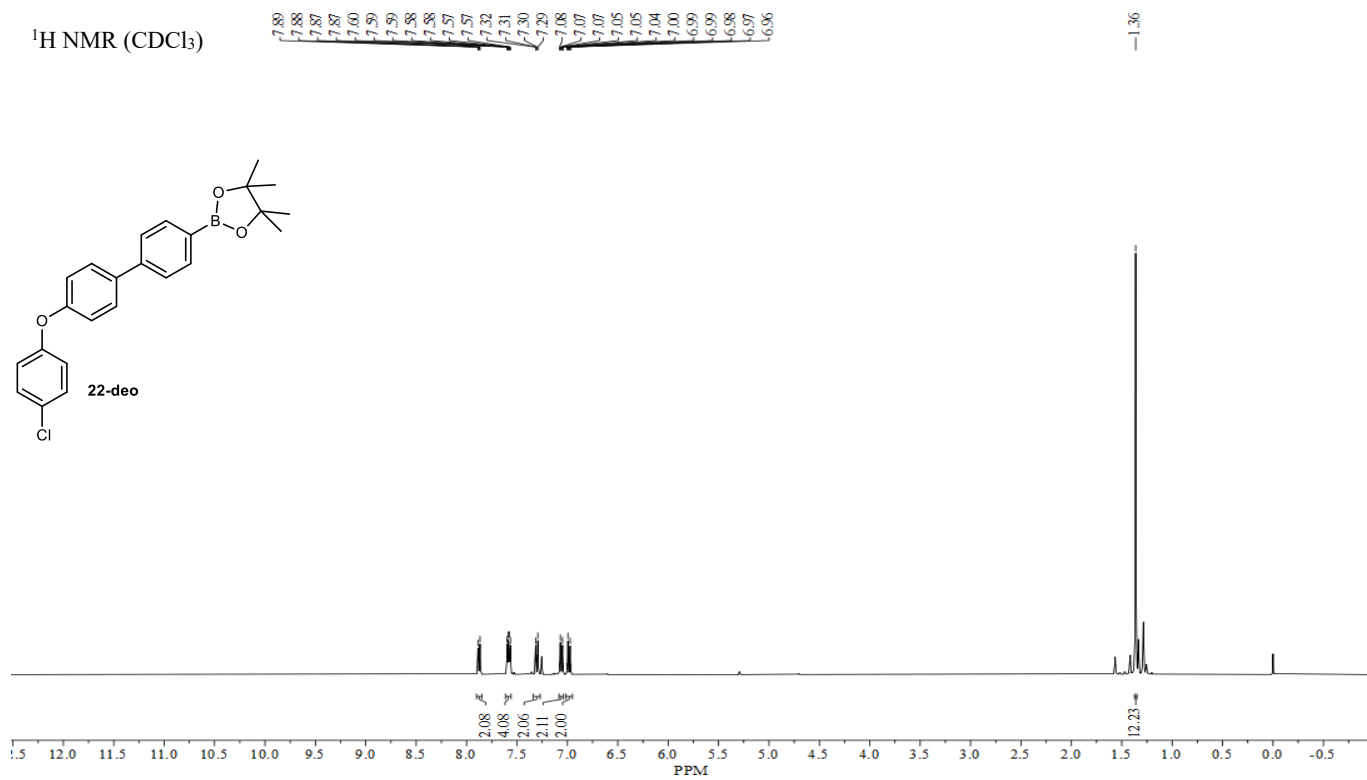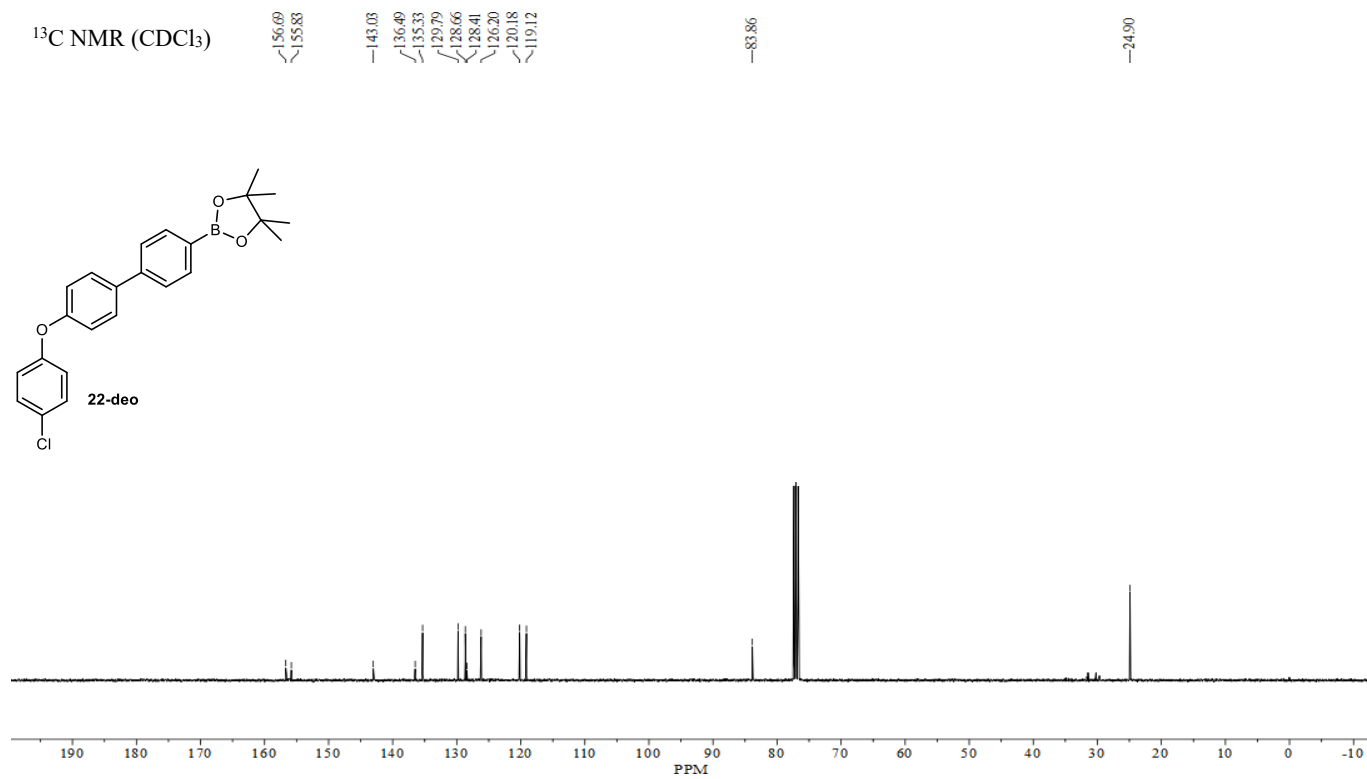

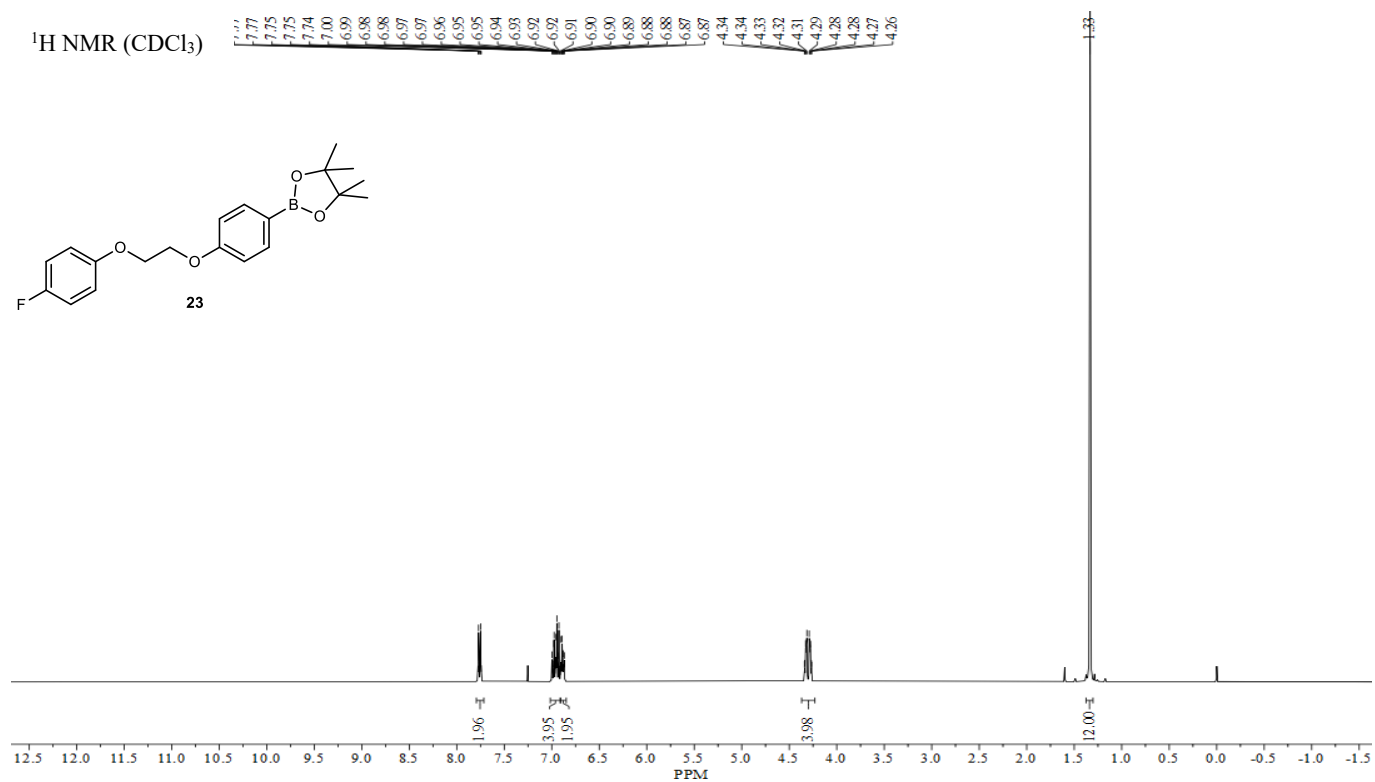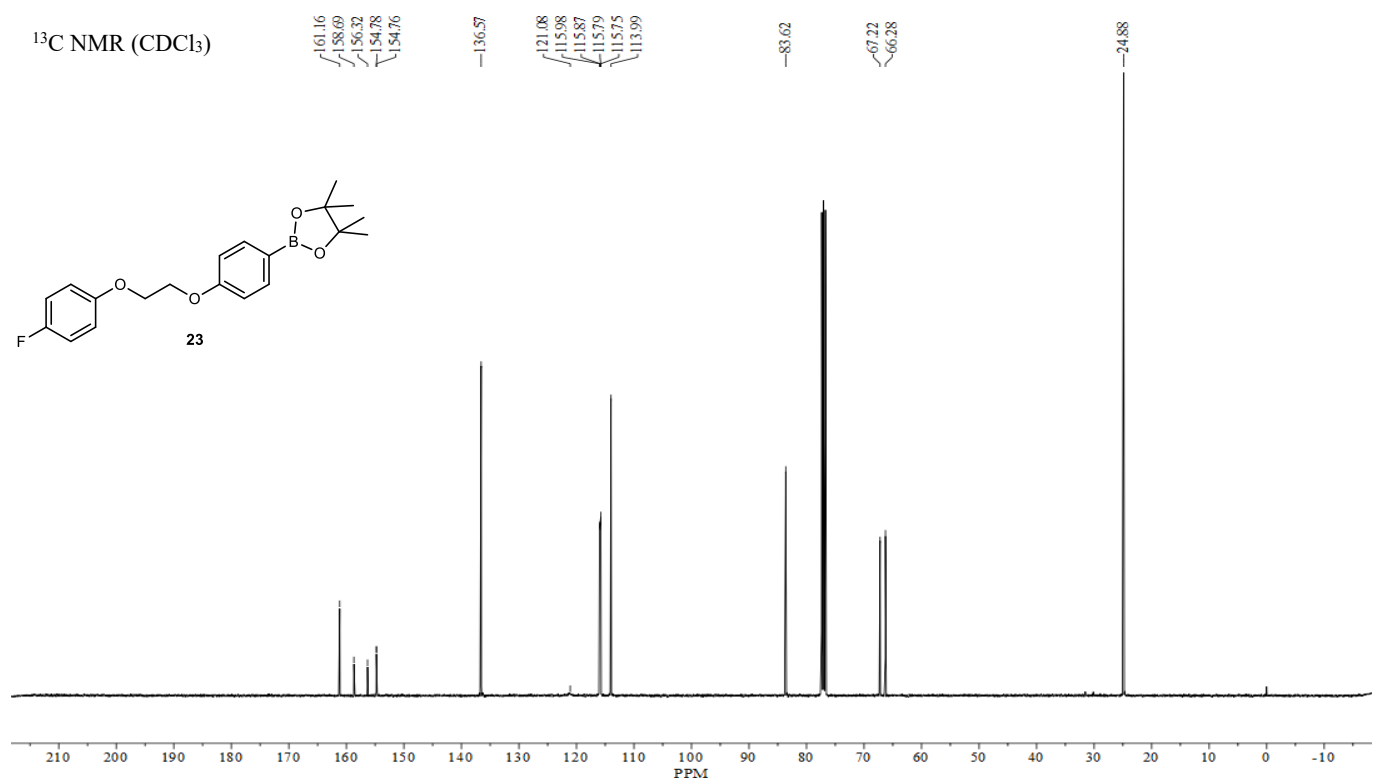

$^{19}\text{F}$  NMR ( $\text{CDCl}_3$ )

-123.48

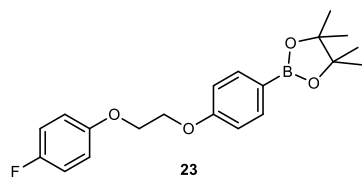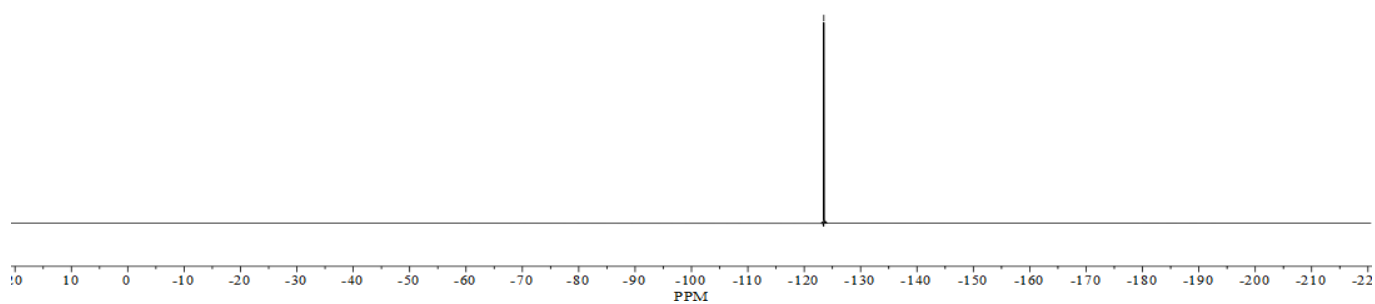

$^1\text{H}$  NMR ( $\text{CDCl}_3$ )

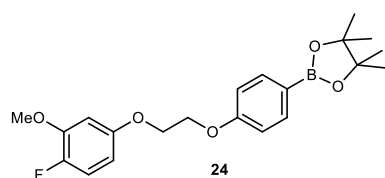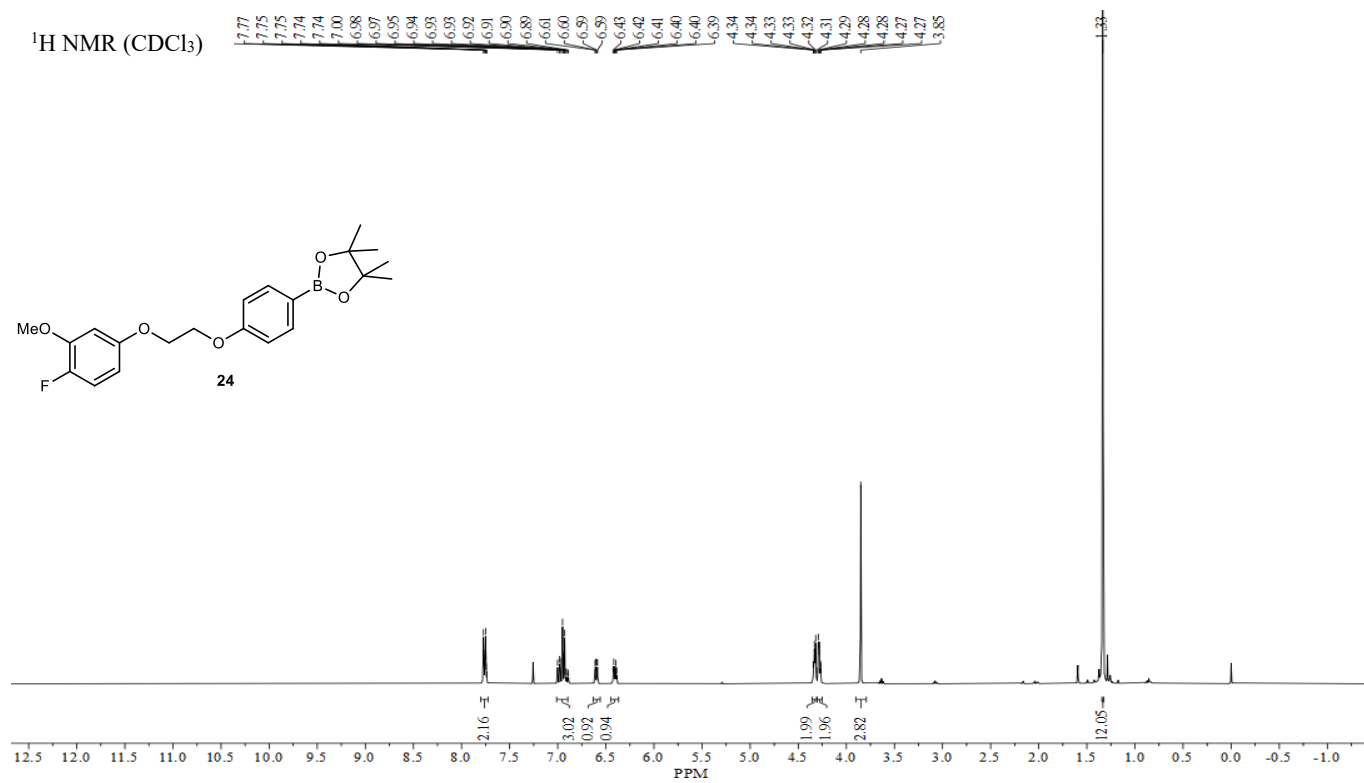



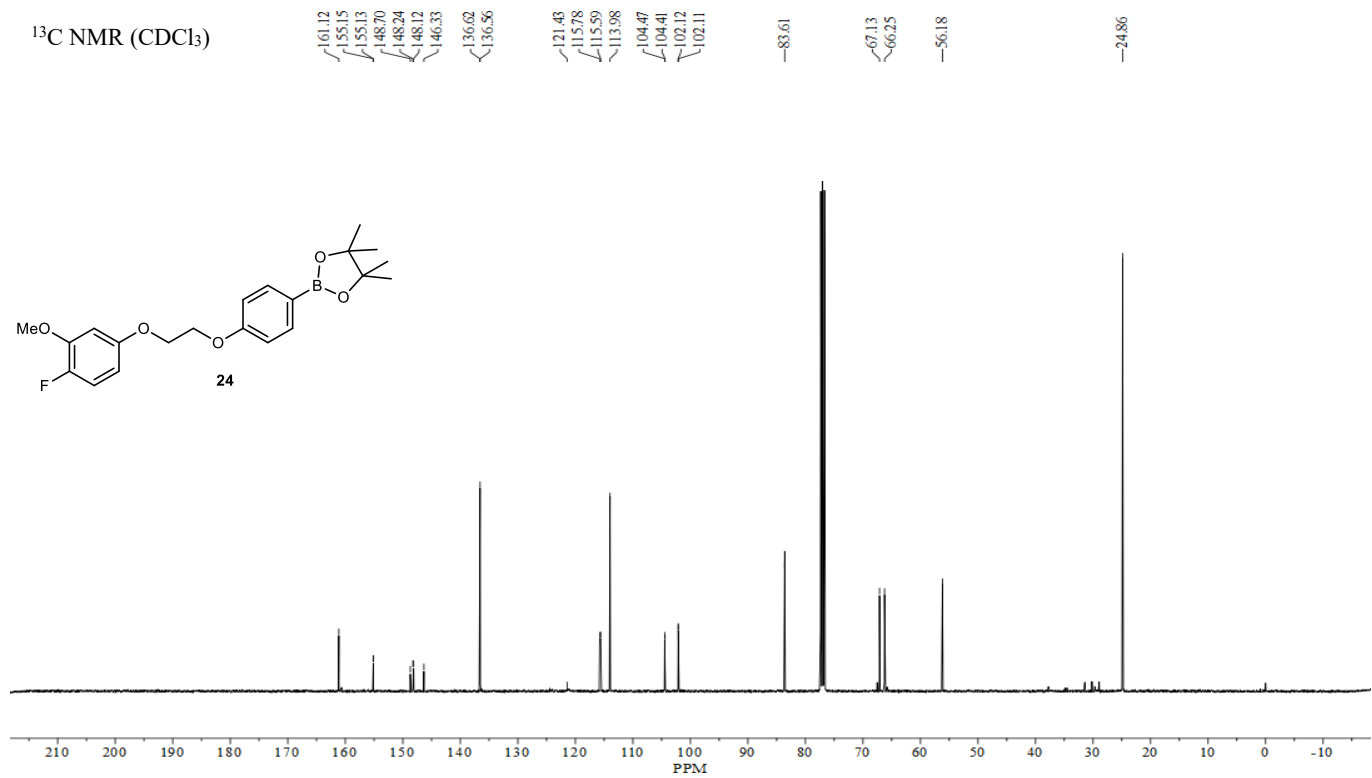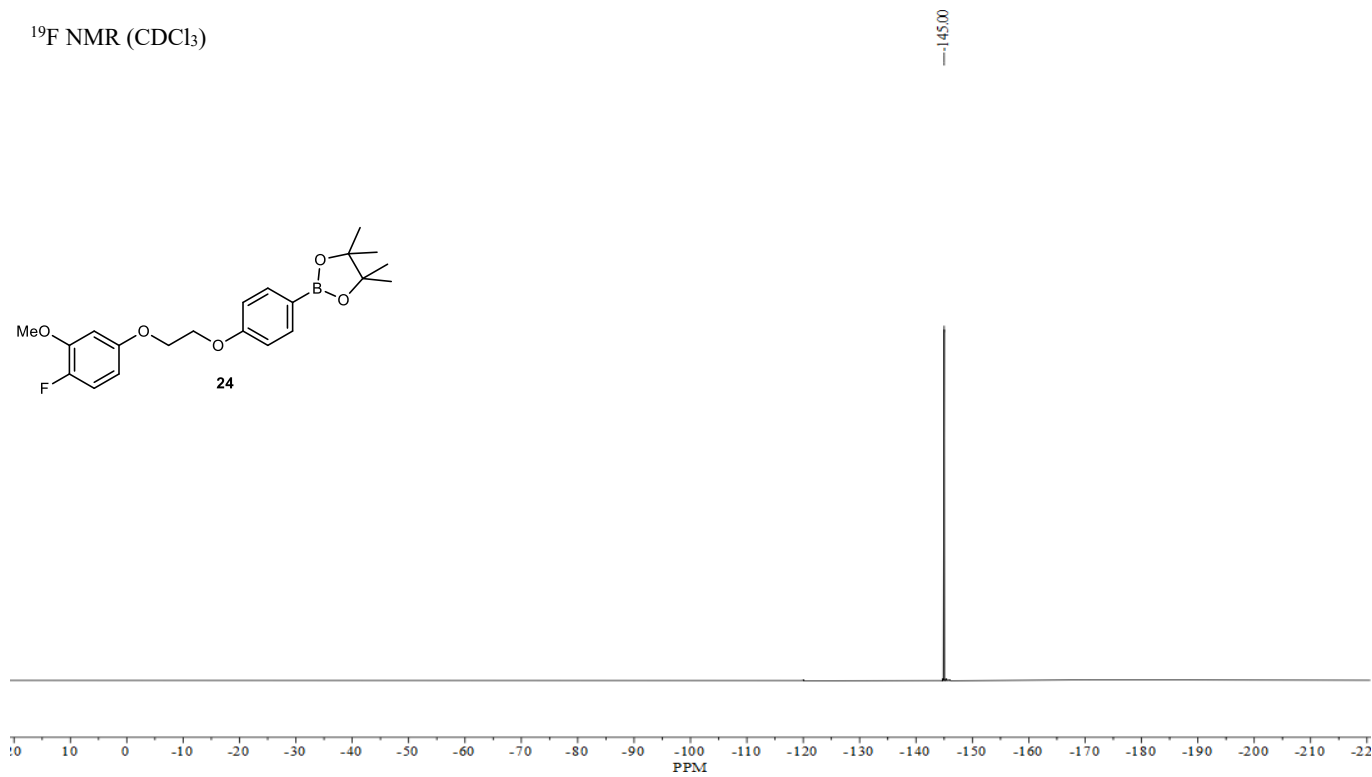

<sup>1</sup>H NMR (CDCl<sub>3</sub>)

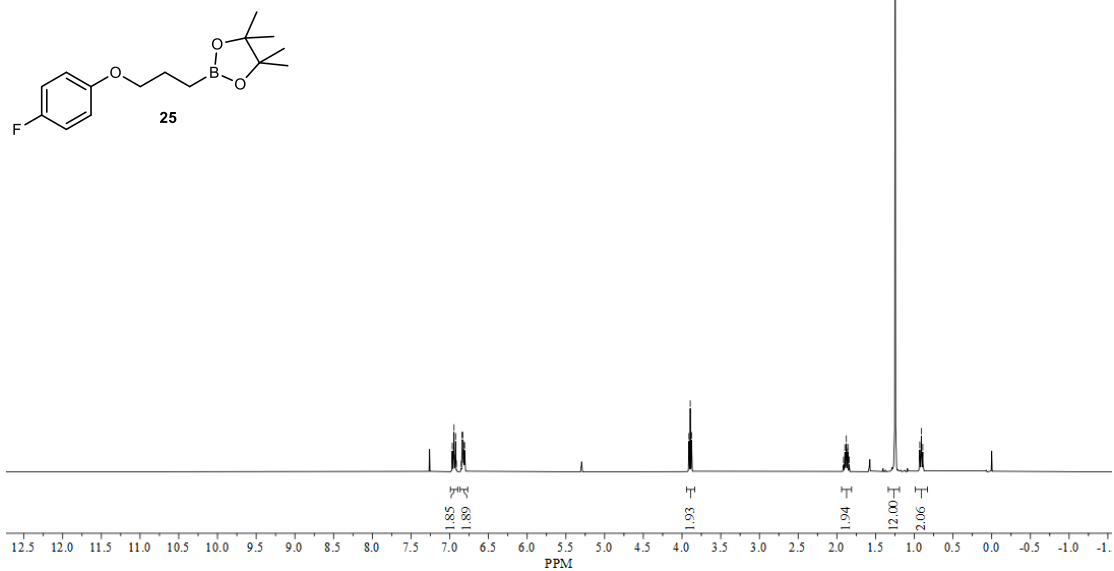

<sup>13</sup>C NMR (CDCl<sub>3</sub>)

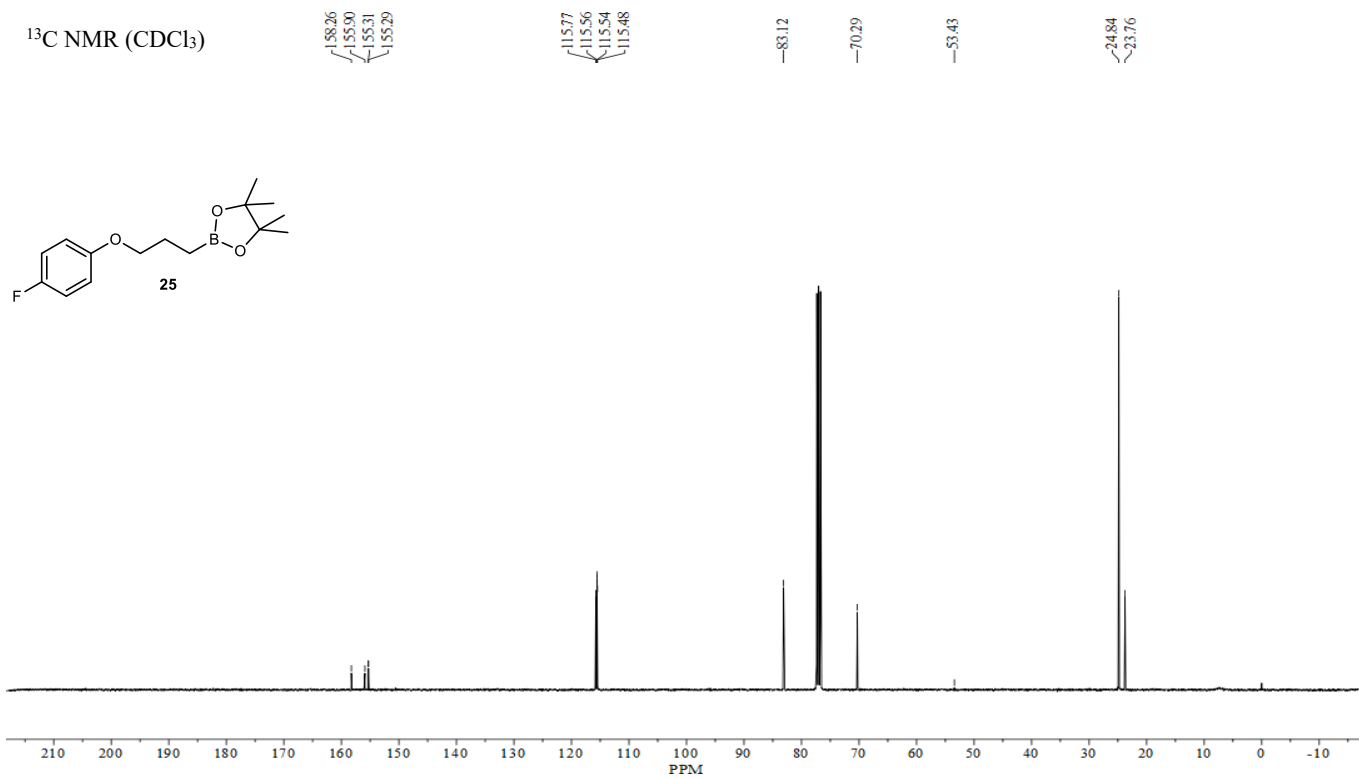

$^{19}\text{F}$  NMR ( $\text{CDCl}_3$ )

-124.61

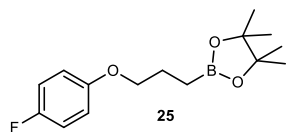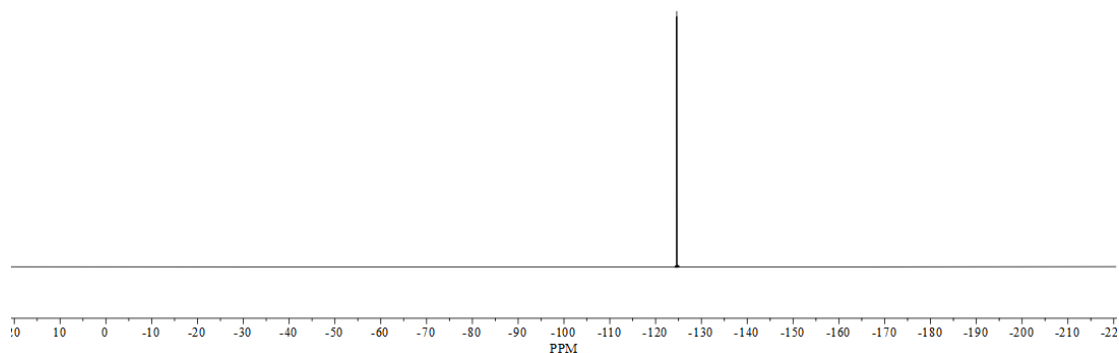

$^1\text{H}$  NMR ( $\text{CDCl}_3$ )

6.98, 6.97, 6.97, 6.96, 6.96, 6.95, 6.95, 6.94, 6.94, 6.93, 6.92, 6.85, 6.84, 6.83, 6.83, 6.82, 6.81, 6.81, 6.80, 5.78, 5.75, 5.33, 5.31, 5.30, 5.29, 5.29, 5.29, 5.28, 5.28, 5.26, 5.21, 5.19, 5.19, 5.19, 5.18, 5.17, 5.17, 5.16, 5.15, 5.15, 4.11, 4.10, 4.08, 4.08, 4.06, 3.99, 3.98, 3.98, 3.97, 3.97, 3.96, 3.95, 3.95, 2.11, 2.04, 2.03, 2.01

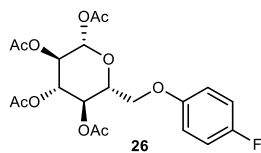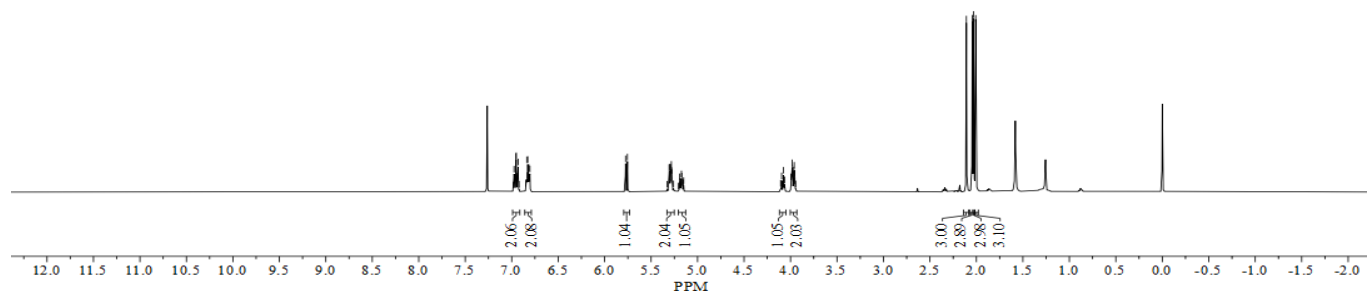

$^{13}\text{C}$  NMR ( $\text{CDCl}_3$ )

170.18  
169.39  
169.26  
169.02  
158.85  
156.48  
154.43  
154.41

116.01  
115.98  
115.93  
115.75

-91.76

73.23  
72.87  
70.31  
68.58  
67.25

20.82  
20.61  
20.58

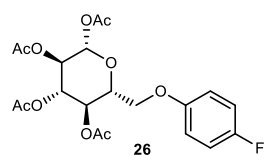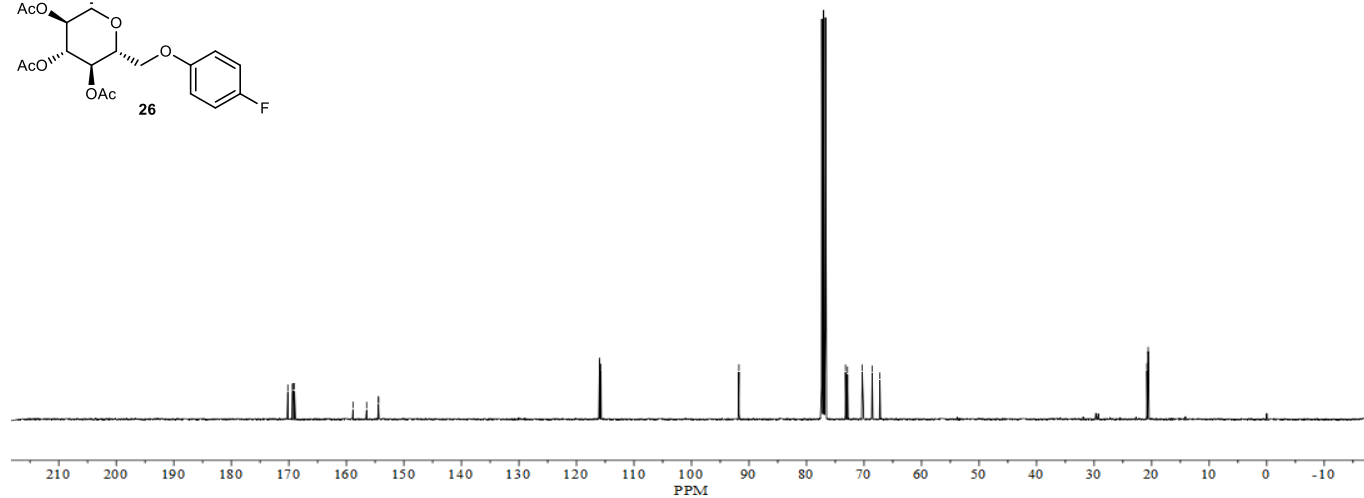

$^{19}\text{F}$  NMR ( $\text{CDCl}_3$ )

-123.01

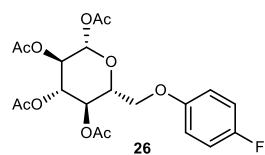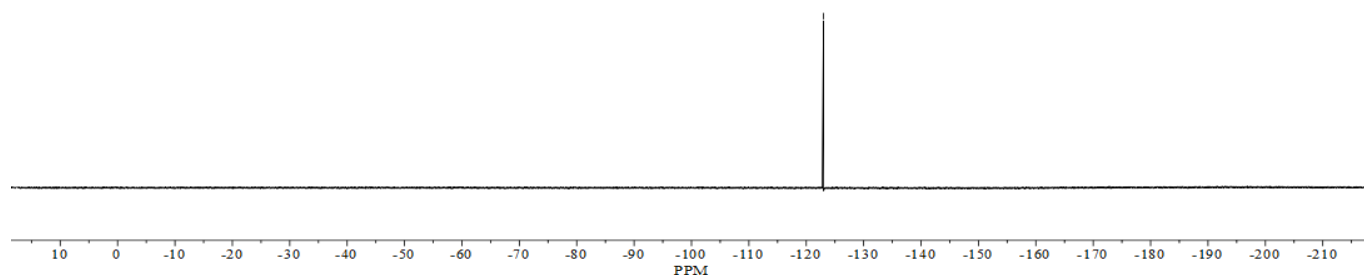

<sup>1</sup>H NMR (CDCl<sub>3</sub>)

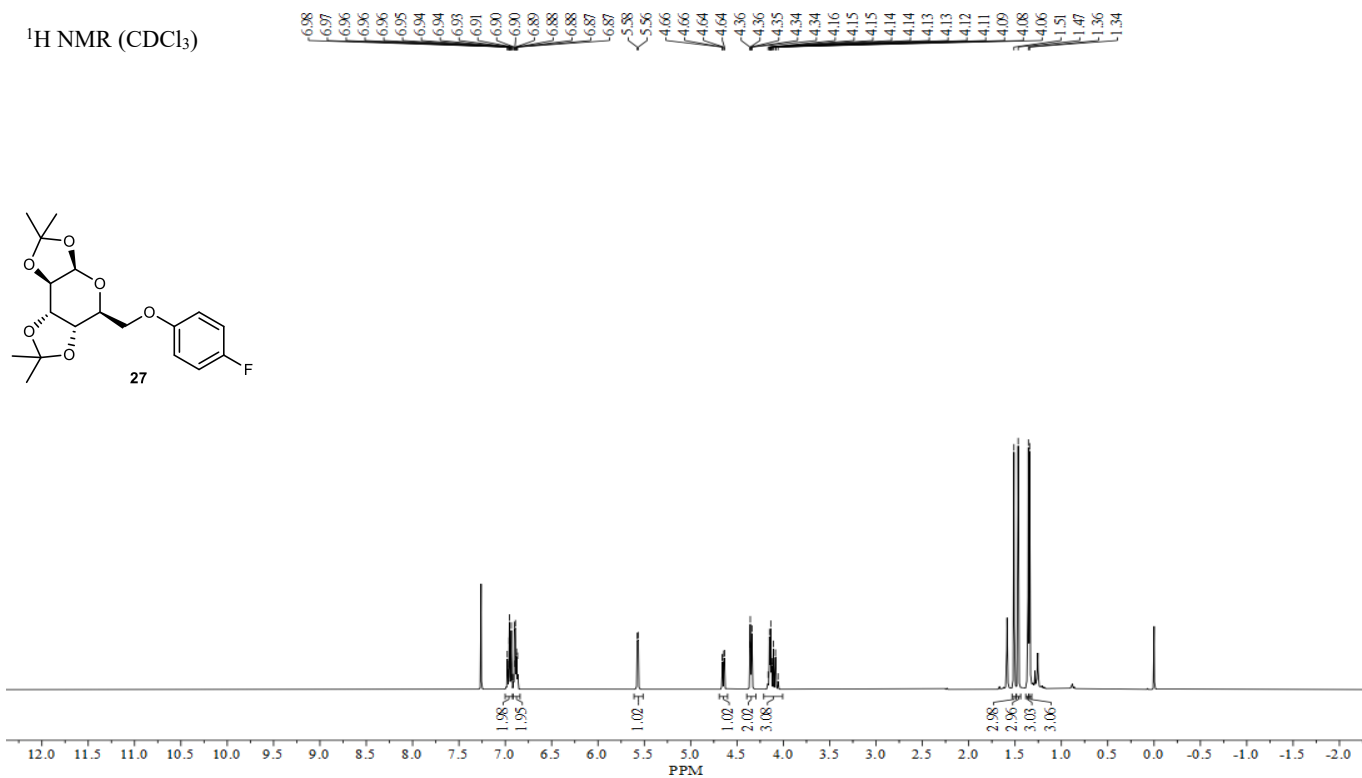

<sup>13</sup>C NMR (CDCl<sub>3</sub>)

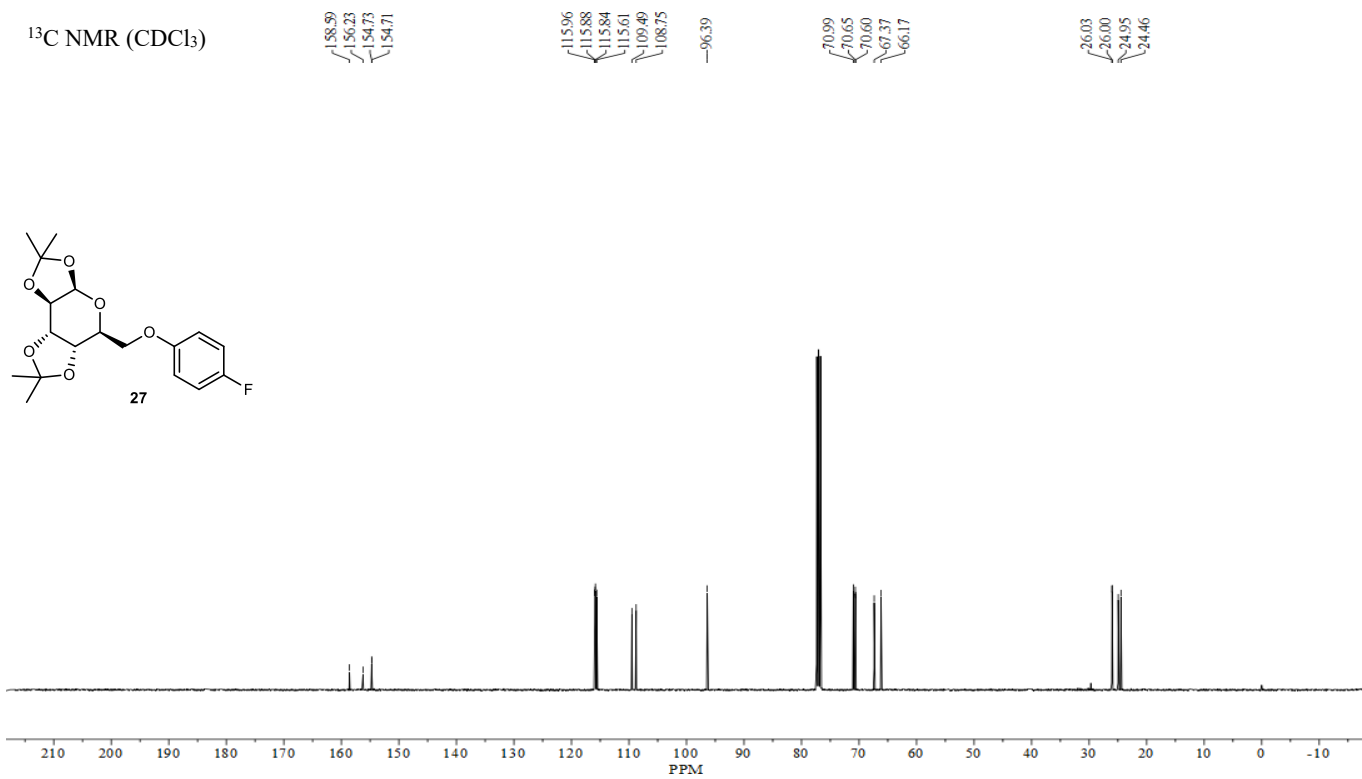

—123.83

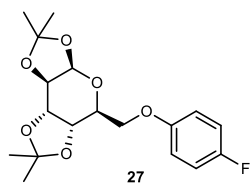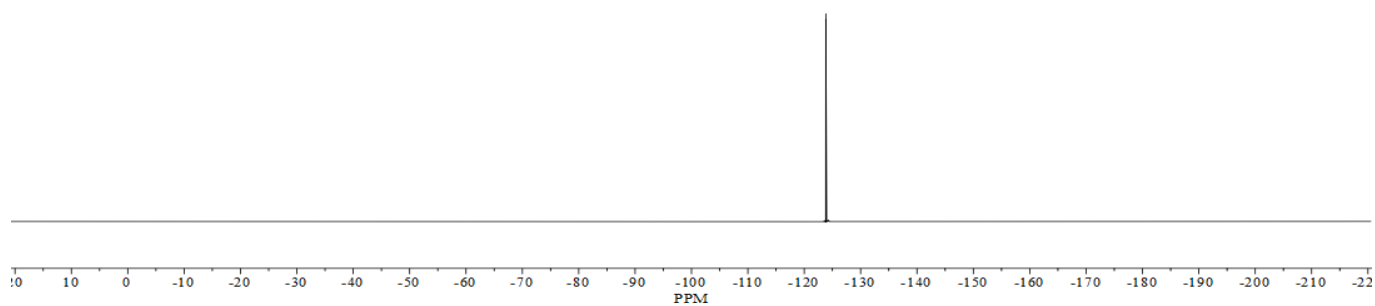<sup>1</sup>H NMR (CDCl<sub>3</sub>)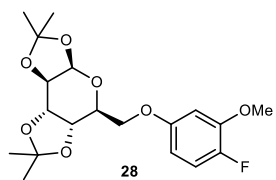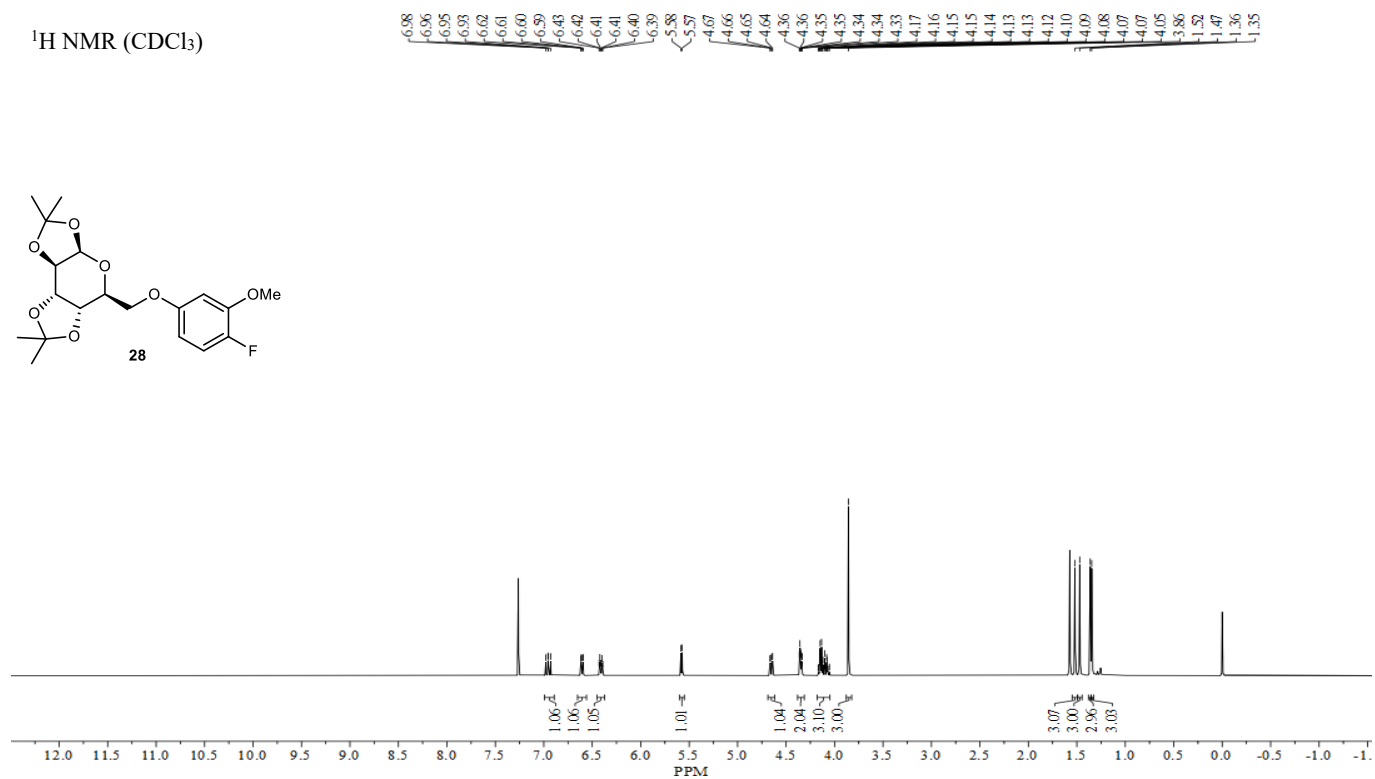

$^{13}\text{C}$  NMR ( $\text{CDCl}_3$ )

155.11  
155.09  
148.57  
148.12  
148.00  
146.21

115.70  
115.50  
109.51  
108.76  
104.72  
104.65  
102.13  
102.11  
96.41

71.02  
70.66  
70.57  
67.31  
66.21  
-56.17

26.04  
26.00  
24.94  
24.47

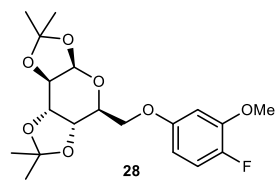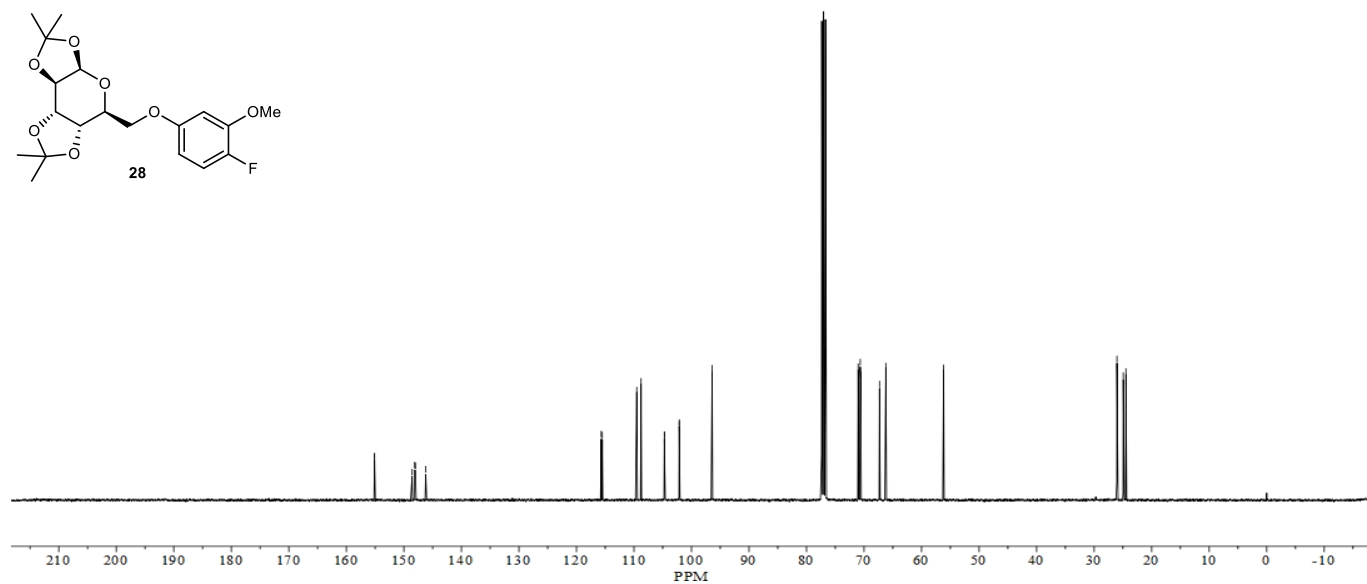

$^{19}\text{F}$  NMR ( $\text{CDCl}_3$ )

-145.39

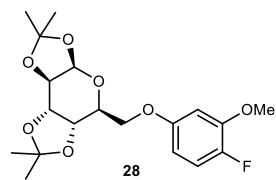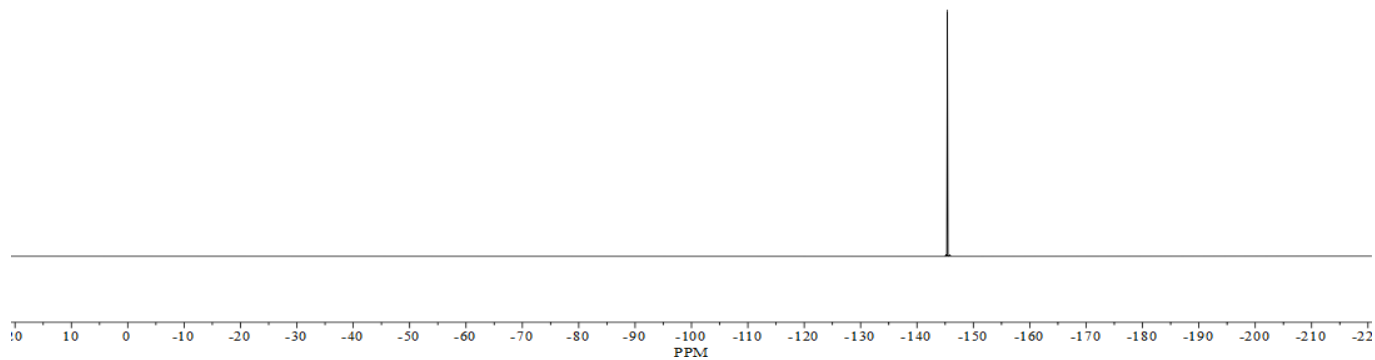

<sup>1</sup>H NMR (CDCl<sub>3</sub>)

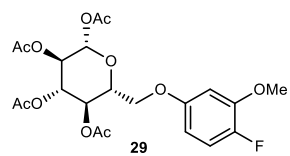

6.97, 6.95, 6.94, 6.92, 6.87, 6.87, 6.85, 6.85, 6.83, 6.82, 6.82, 6.81, 6.80, 6.29, 5.77, 5.75, 5.31, 5.31, 5.30, 5.30, 5.29, 5.29, 5.27, 5.22, 5.20, 5.19, 5.19, 5.18, 5.18, 5.18, 5.17, 5.16, 5.16, 5.14, 4.11, 4.10, 4.08, 4.07, 3.99, 3.98, 3.97, 3.96, 3.95, 3.94, 2.11, 2.05, 2.01

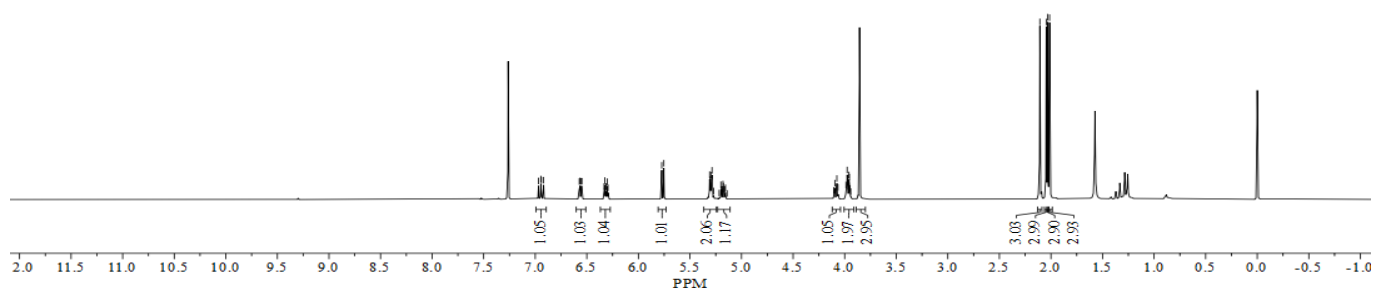

<sup>13</sup>C NMR (CDCl<sub>3</sub>)

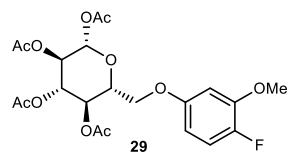

170.17, 169.39, 169.26, 169.02, 154.84, 154.81, 148.87, 148.24, 148.12, 146.50, 115.72, 115.53, 104.56, 104.49, 102.34, 102.33, -91.77, 73.23, 72.89, 70.27, 68.46, 67.07, -56.19, 20.82, 20.63, 20.60, 20.57

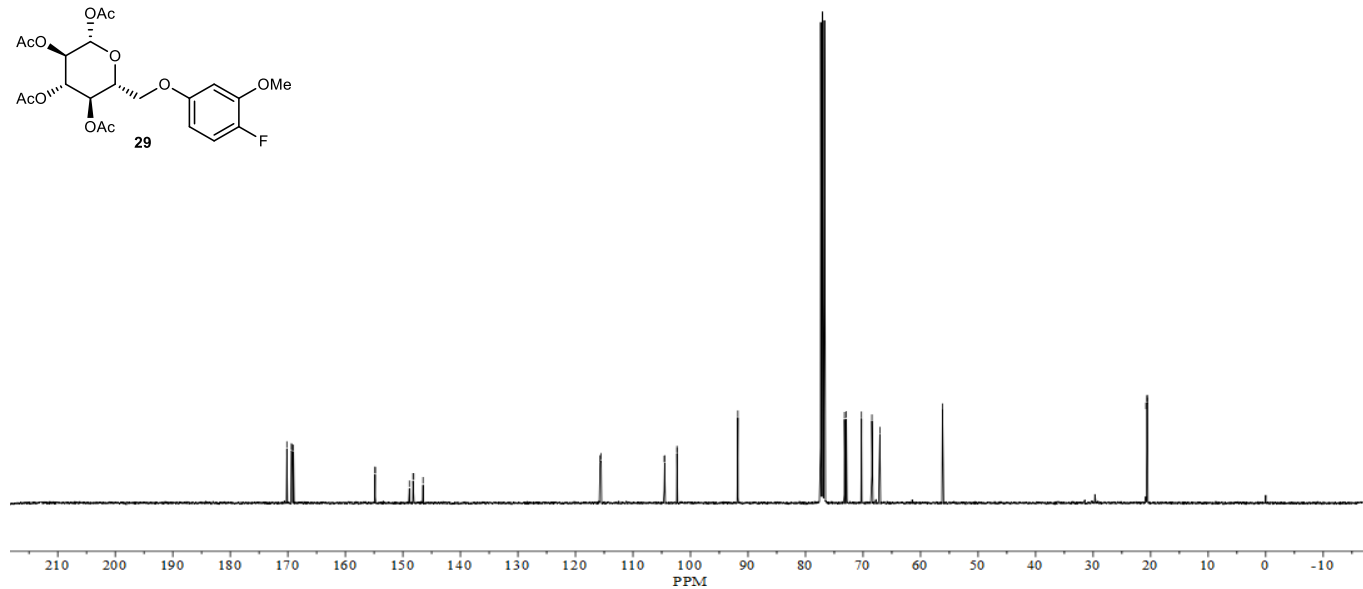



$^{19}\text{F}$  NMR ( $\text{CDCl}_3$ )

-144.53

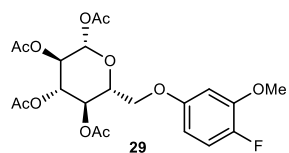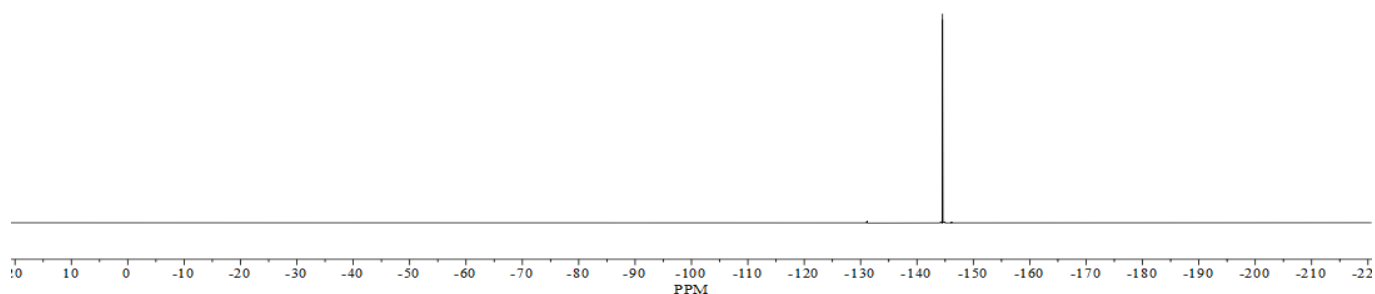

$^1\text{H}$  NMR ( $\text{CD}_3\text{OD}$ )

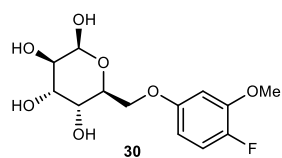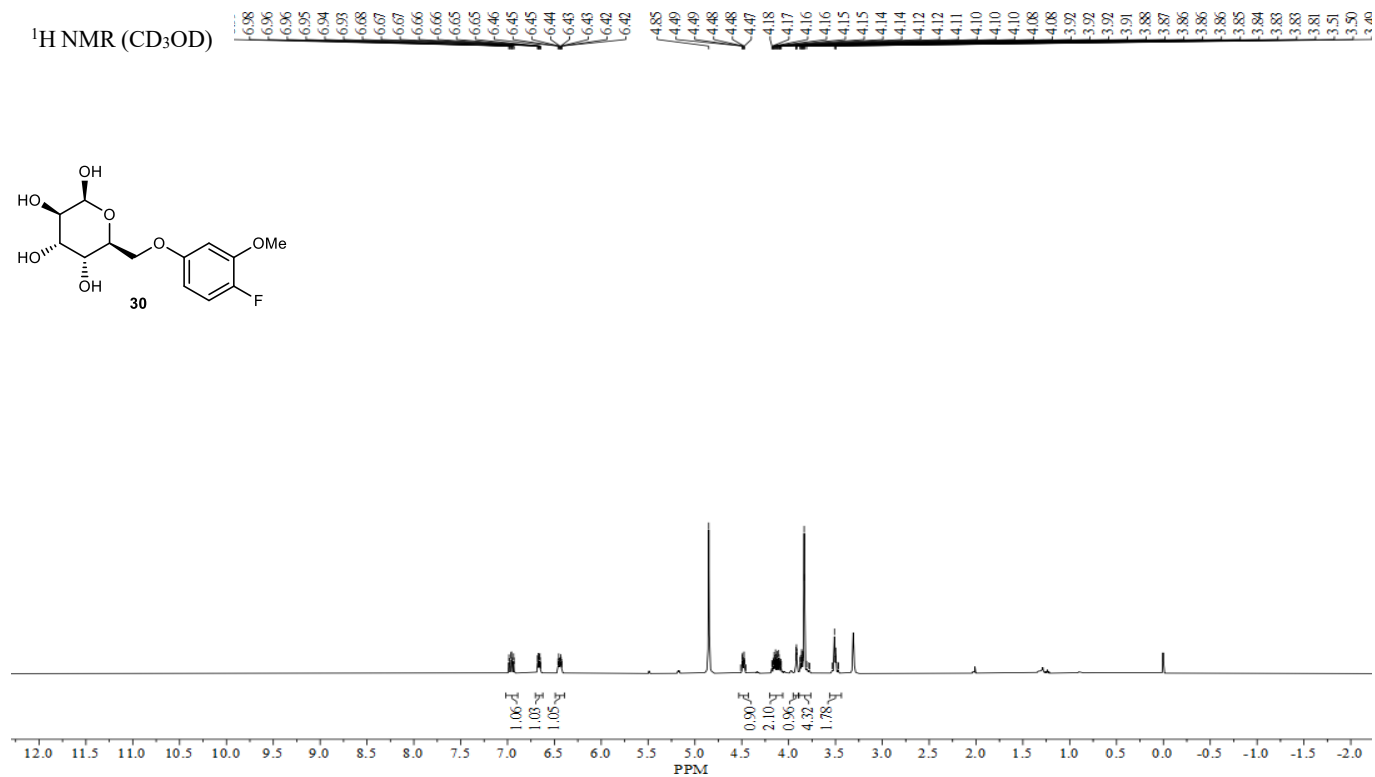

$^{13}\text{C}$  NMR ( $\text{CD}_3\text{OD}$ )

155.47  
155.45  
148.44  
148.21  
148.09  
146.09

115.29  
115.09  
104.66  
104.60  
101.46  
97.43

73.52  
73.20  
72.33  
69.03  
67.68

55.25

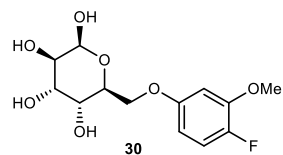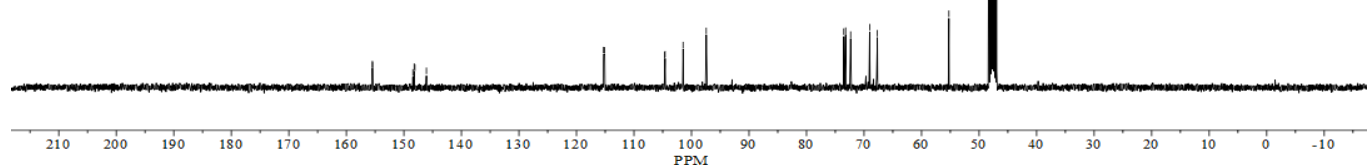

$^{19}\text{F}$  NMR ( $\text{CD}_3\text{OD}$ )

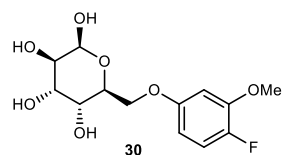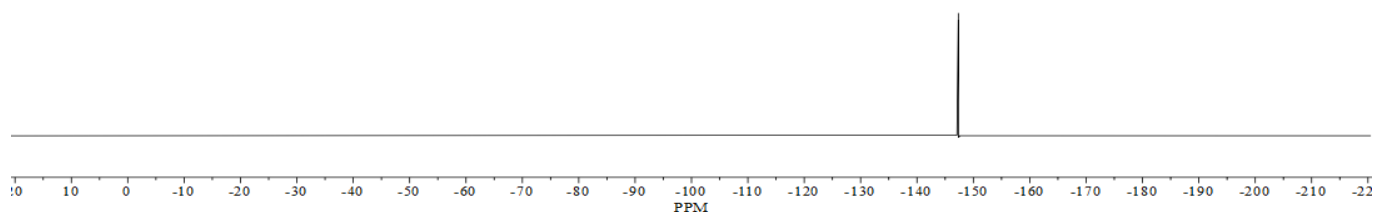

$^1\text{H}$  NMR ( $\text{CDCl}_3$ )

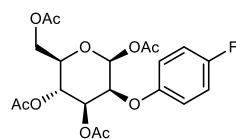

31

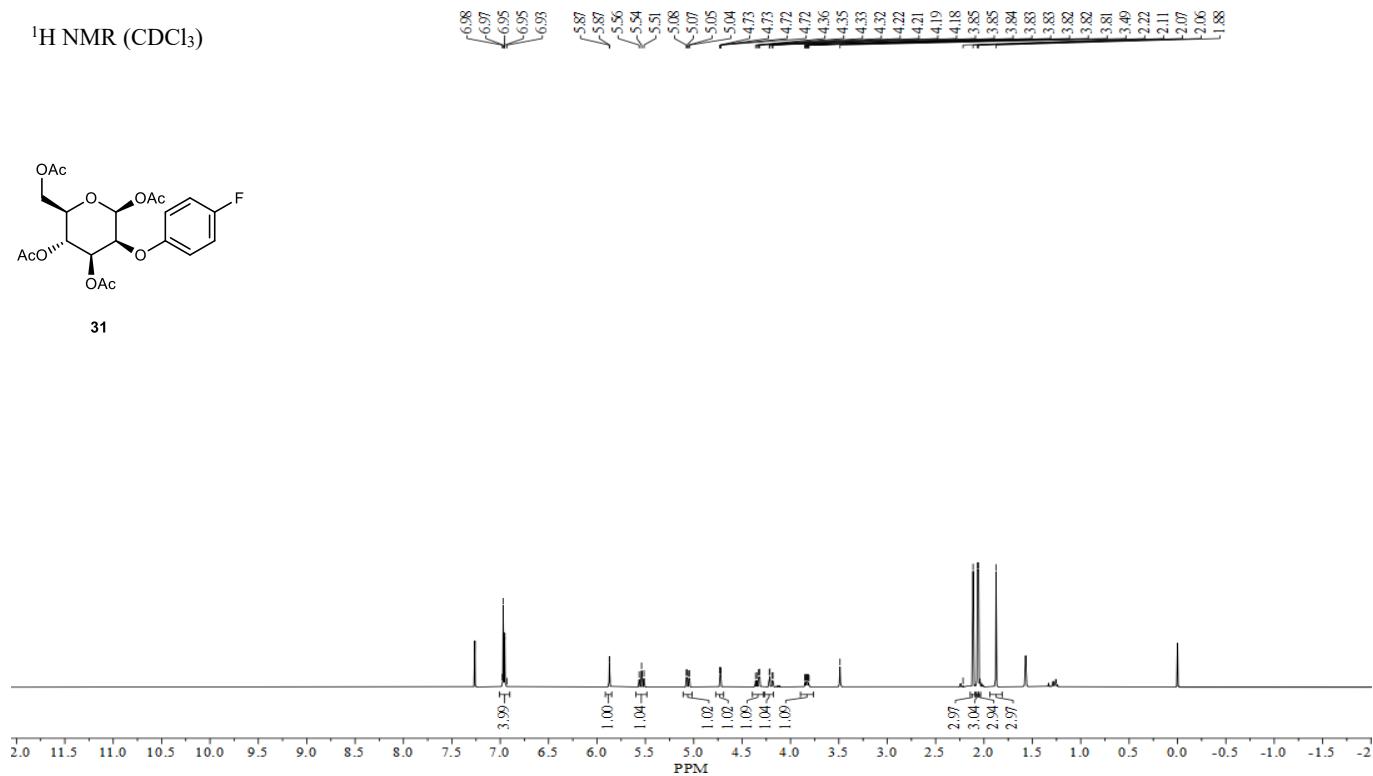

$^{19}\text{F}$  NMR ( $\text{CDCl}_3$ )

—121.19

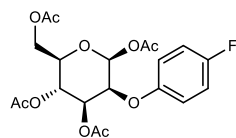

**31**

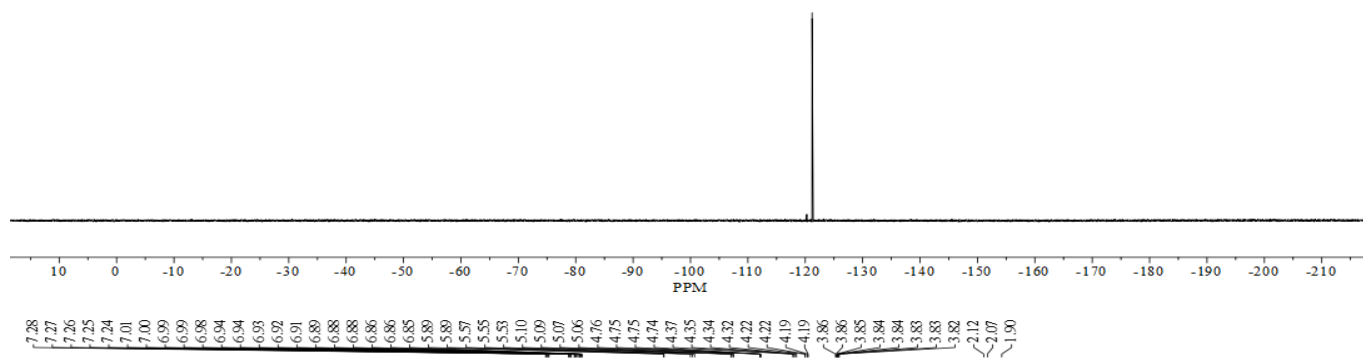

$^1\text{H}$  NMR ( $\text{CDCl}_3$ )

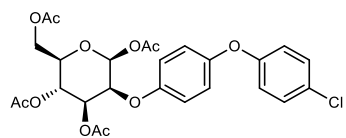

**31-deo**

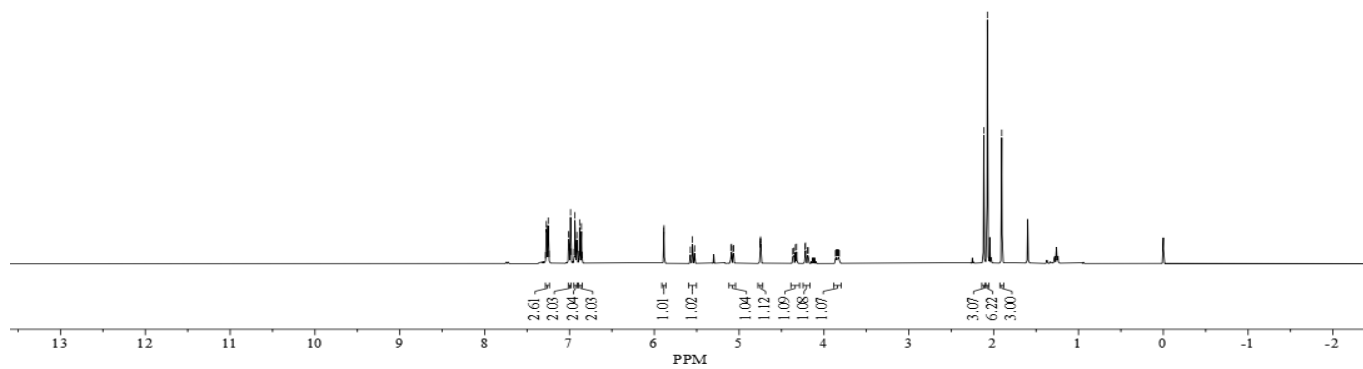

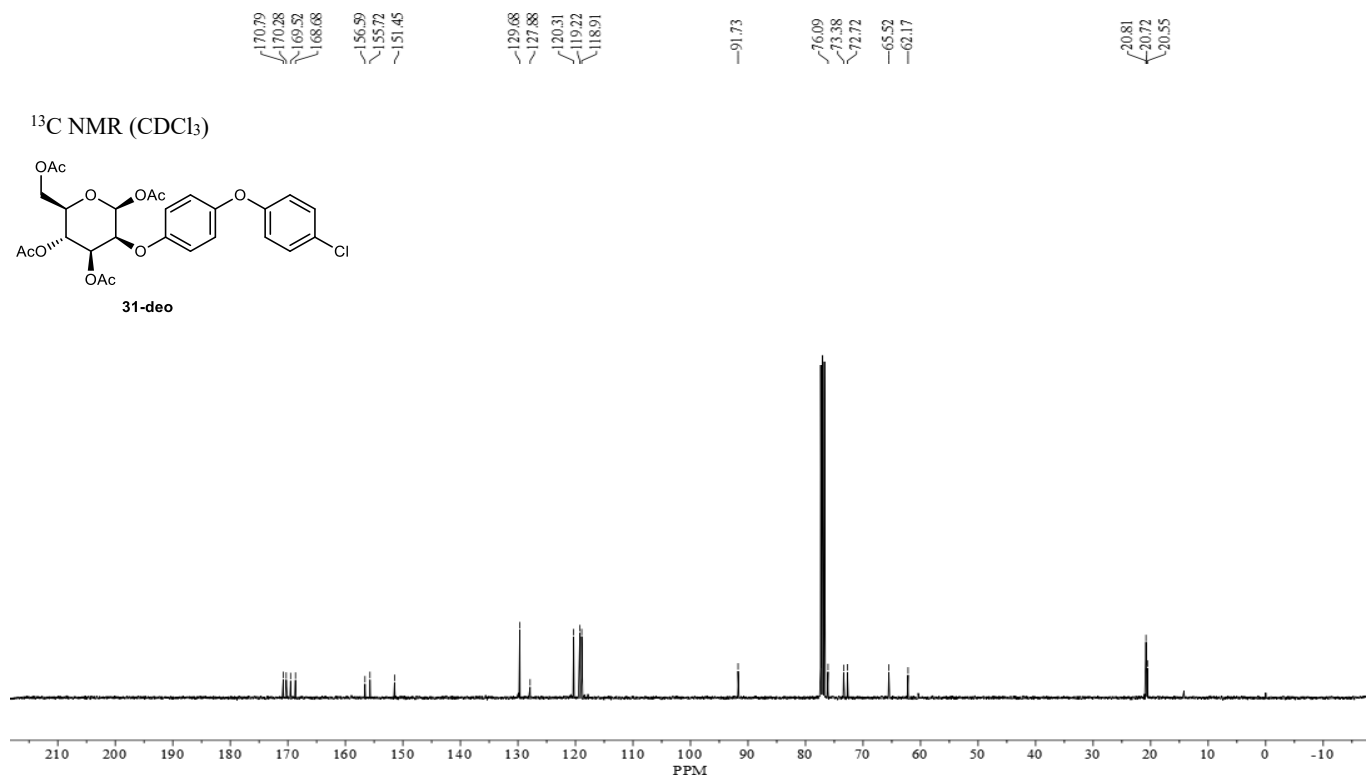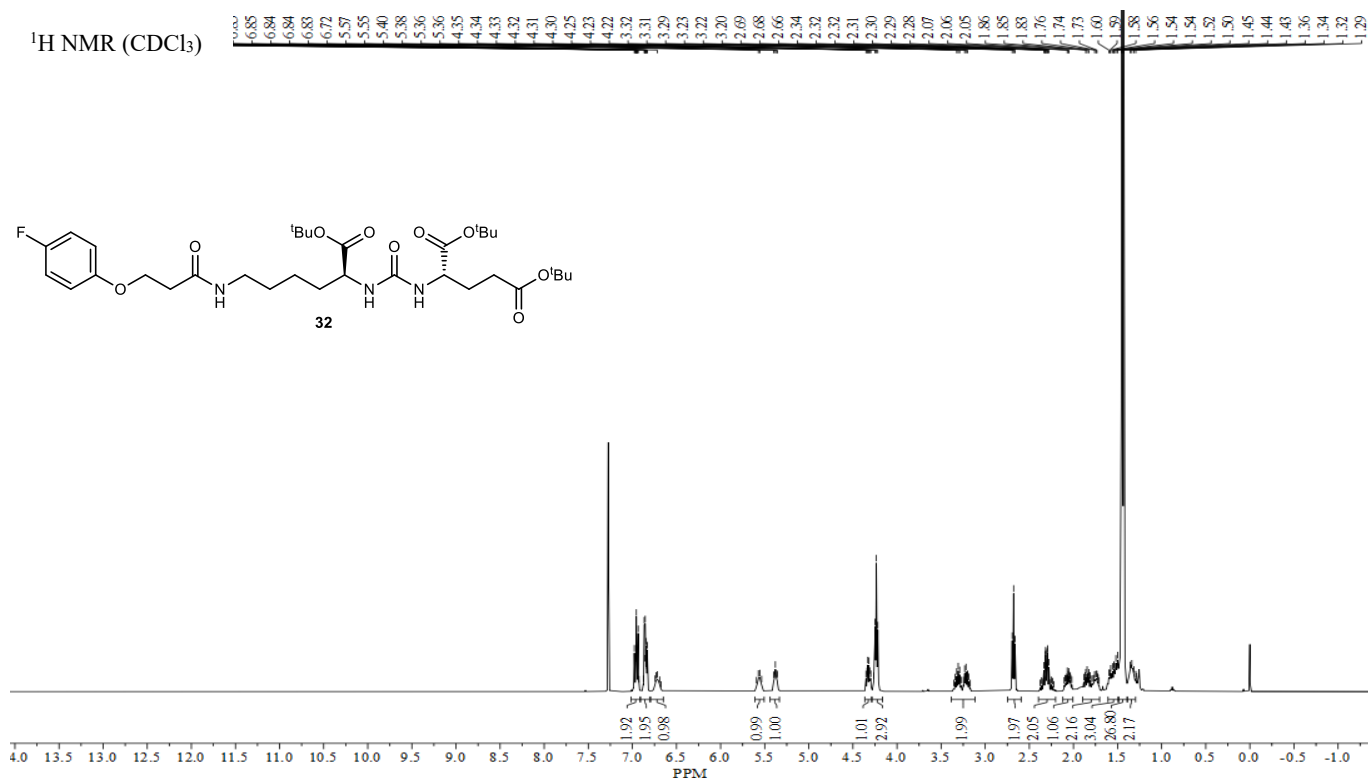

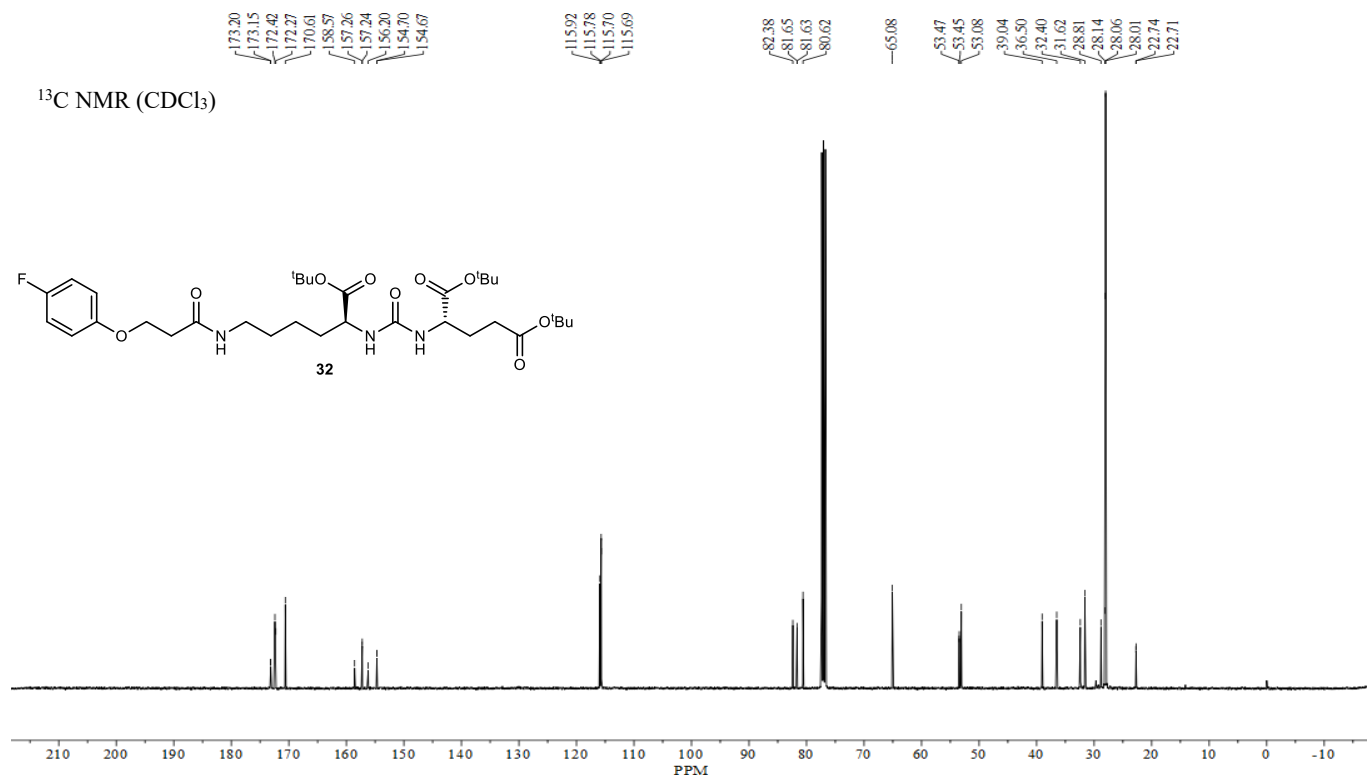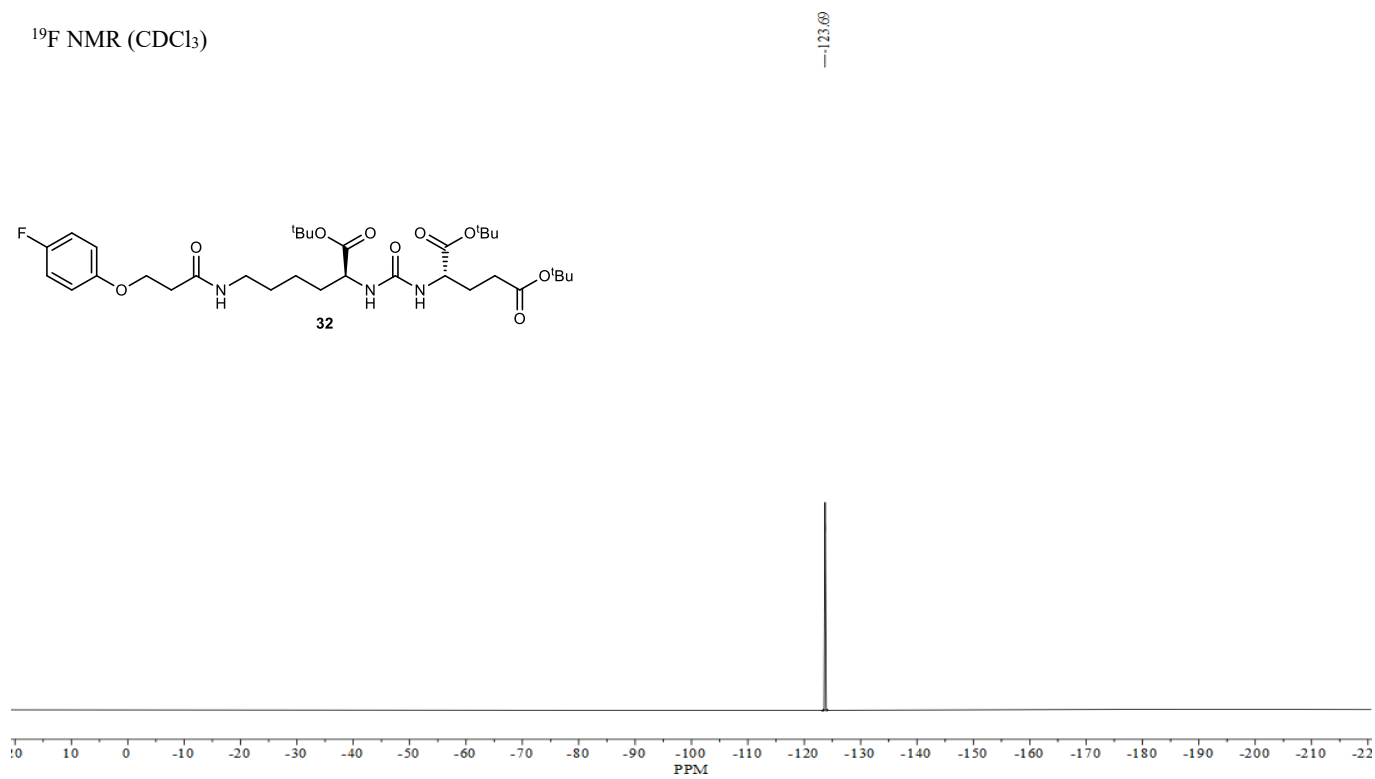

11.35  
11.26  
8.50  
8.49  
8.49  
8.48  
8.47  
8.47  
7.79  
7.78  
7.77  
7.76  
7.75  
7.74  
7.74  
7.72  
7.71  
7.71  
7.70  
7.39  
7.38  
7.37  
7.36  
7.35  
7.35  
7.34  
7.34  
7.33  
7.33  
7.32  
7.07  
7.05  
7.02  
6.98  
6.97  
6.97  
6.96  
6.95  
6.94  
6.92  
6.92  
6.85  
6.84  
6.84  
6.83  
6.82  
6.82  
6.81  
6.80  
6.79  
6.79  
4.30  
4.28  
4.27  
4.26  
4.24  
3.83  
3.77  
3.66  
3.65  
3.63  
3.62  
3.61  
3.54  
3.52  
3.51  
3.37  
3.30  
2.87  
2.86  
2.84  
2.80  
2.78  
2.77

<sup>1</sup>H NMR (CDCl<sub>3</sub>)

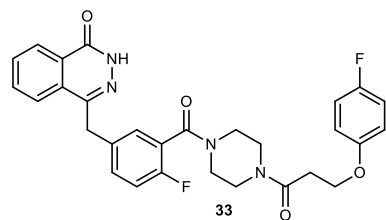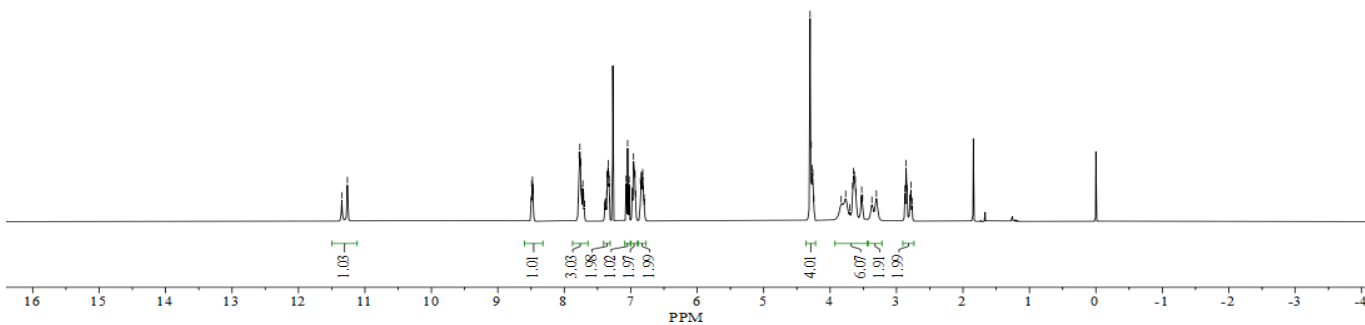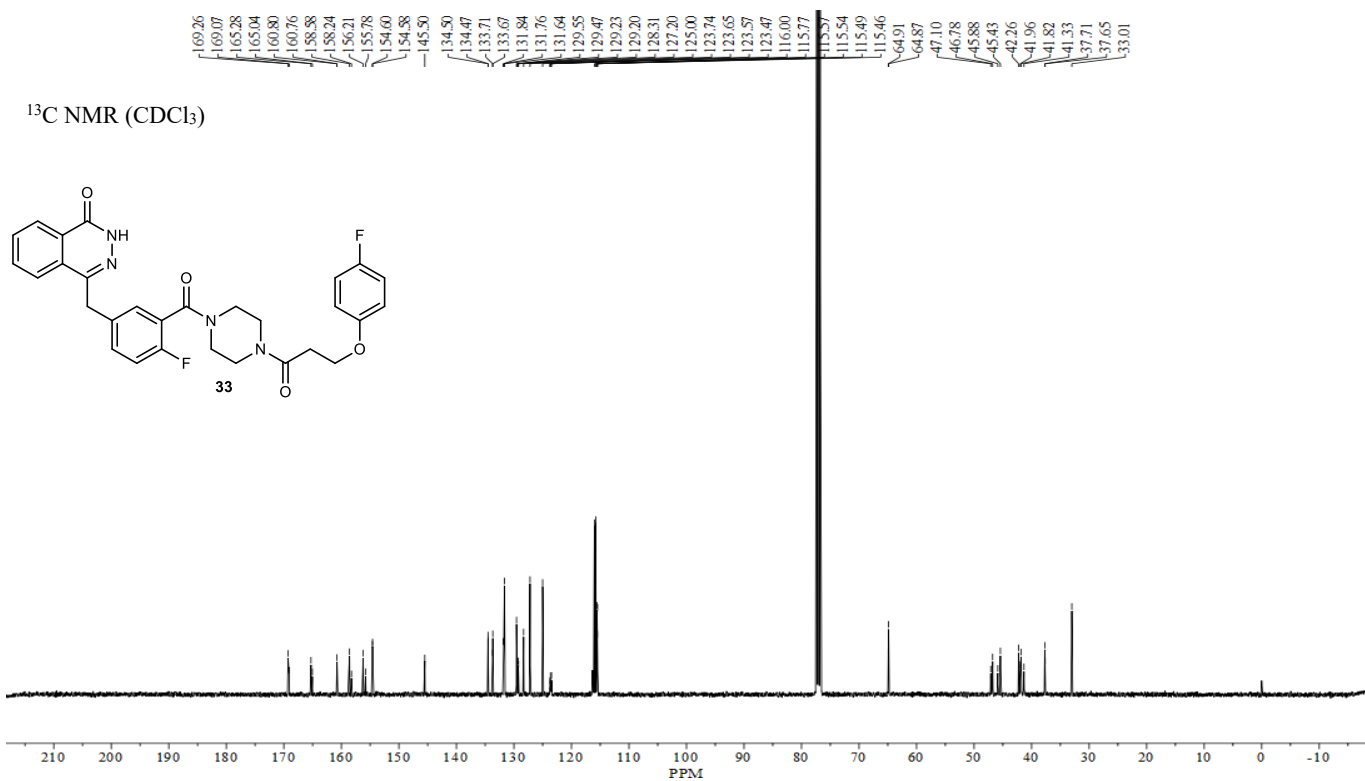

$^{19}\text{F}$  NMR ( $\text{CDCl}_3$ )

-117.64  
-117.69  
-123.49  
-123.55

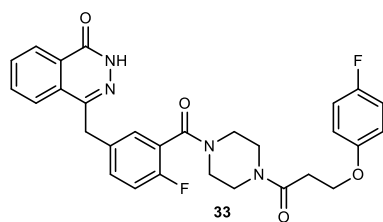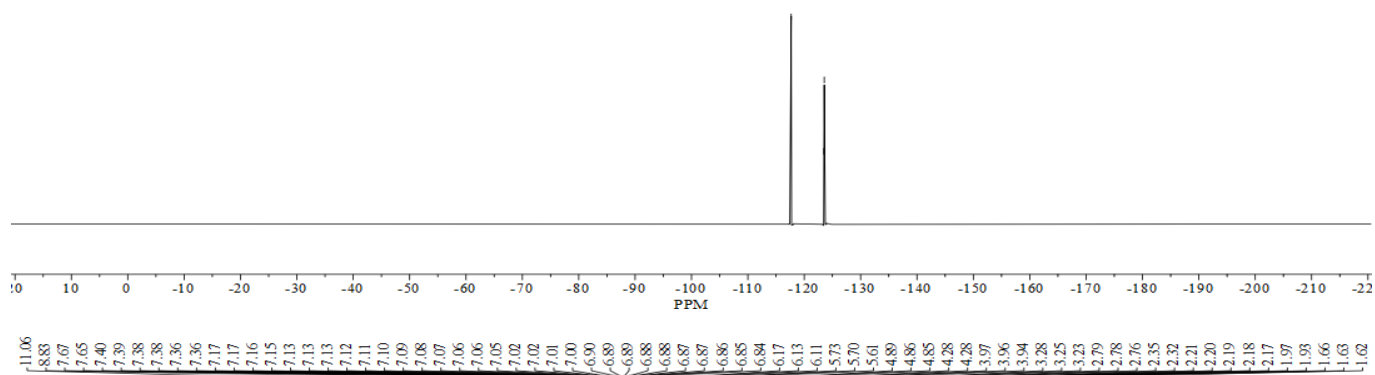

$^1\text{H}$  NMR ( $\text{DMSO}-d_6$ )

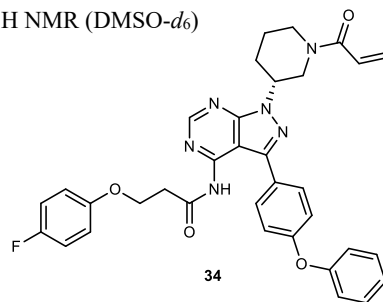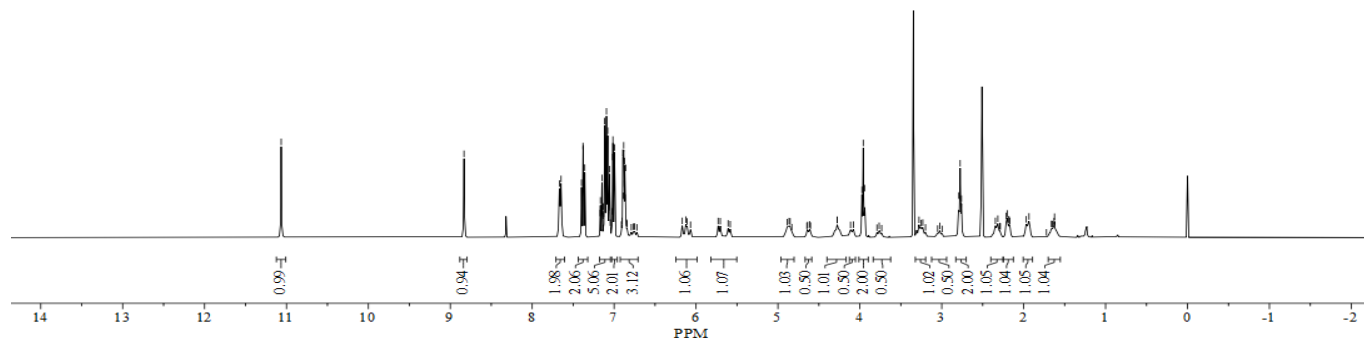



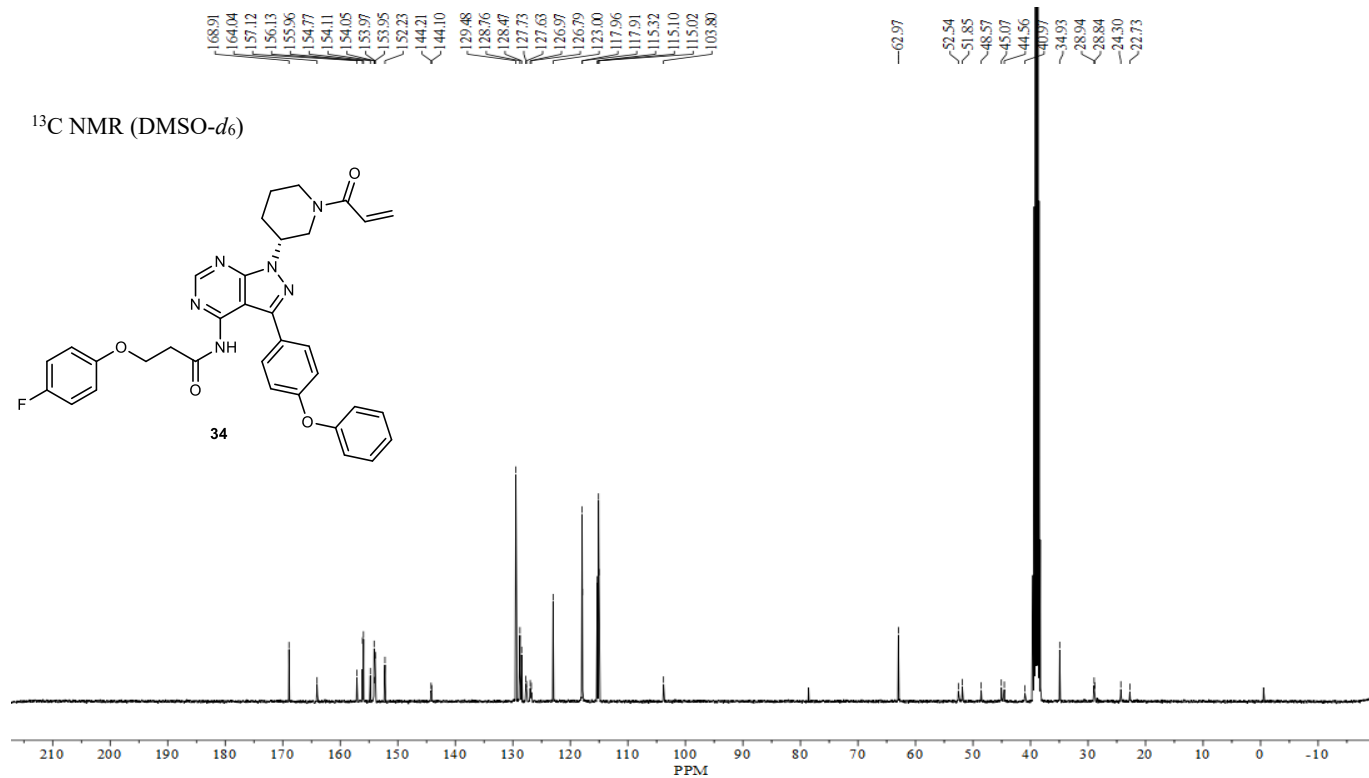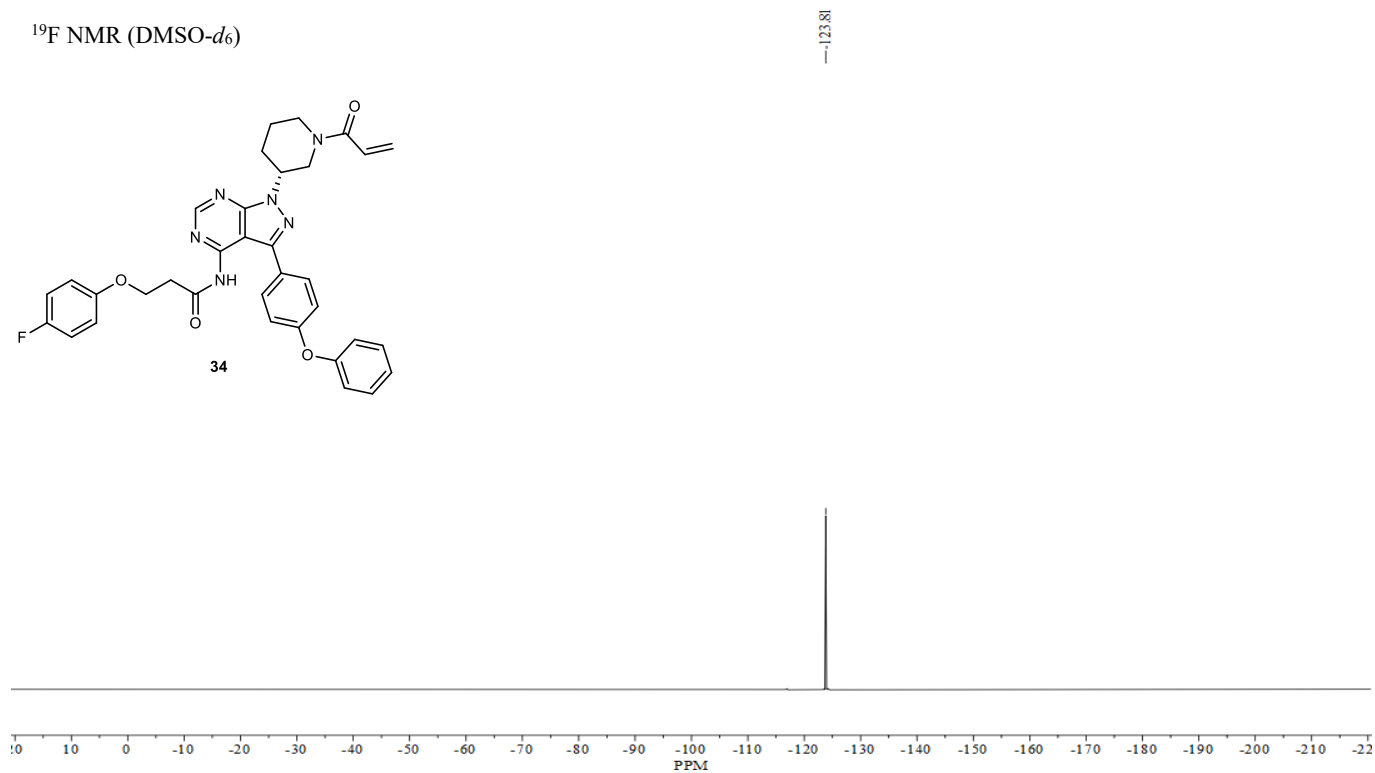

7.99  
7.98  
7.97  
7.96  
7.95  
7.94  
7.93  
7.92  
7.91  
7.90  
7.89  
7.88  
7.87  
7.86  
7.85  
7.84  
7.83  
7.82  
7.81  
7.80  
7.79  
7.78  
7.77  
7.76  
7.75  
7.74  
7.73  
7.72  
7.71  
7.70  
7.69  
7.68  
7.67  
7.66  
7.65  
7.64  
7.63  
7.62  
7.61  
7.60  
7.59  
7.58  
7.57  
7.56  
7.55  
7.54  
7.53  
7.52  
7.51  
7.50  
7.49  
7.48  
7.47  
7.46  
7.45  
7.44  
7.43  
7.42  
7.41  
7.40  
7.39  
7.38  
7.37  
7.36  
7.35  
7.34  
7.33  
7.32  
7.31  
7.30  
7.29  
7.28  
7.27  
7.26  
7.25  
7.24  
7.23  
7.22  
7.21  
7.20  
7.19  
7.18  
7.17  
7.16  
7.15  
7.14  
7.13  
7.12  
7.11  
7.10  
7.09  
7.08  
7.07  
7.06  
7.05  
7.04  
7.03  
7.02  
7.01  
7.00  
6.99  
6.98  
6.97  
6.96  
6.95  
6.94  
6.93  
6.92  
6.91  
6.90  
6.89  
6.88  
6.87  
6.86  
6.85  
6.84  
6.83  
6.82  
6.81  
6.80  
6.79  
6.78  
6.77  
6.76  
6.75  
6.74  
6.73  
6.72  
6.71  
6.70  
6.69  
6.68  
6.67  
6.66  
6.65  
6.64  
6.63  
6.62  
6.61  
6.60  
6.59  
6.58  
6.57  
6.56  
6.55  
6.54  
6.53  
6.52  
6.51  
6.50  
6.49  
6.48  
6.47  
6.46  
6.45  
6.44  
6.43  
6.42  
6.41  
6.40  
6.39  
6.38  
6.37  
6.36  
6.35  
6.34  
6.33  
6.32  
6.31  
6.30  
6.29  
6.28  
6.27  
6.26  
6.25  
6.24  
6.23  
6.22  
6.21  
6.20  
6.19  
6.18  
6.17  
6.16  
6.15  
6.14  
6.13  
6.12  
6.11  
6.10  
6.09  
6.08  
6.07  
6.06  
6.05  
6.04  
6.03  
6.02  
6.01  
6.00  
5.99  
5.98  
5.97  
5.96  
5.95  
5.94  
5.93  
5.92  
5.91  
5.90  
5.89  
5.88  
5.87  
5.86  
5.85  
5.84  
5.83  
5.82  
5.81  
5.80  
5.79  
5.78  
5.77  
5.76  
5.75  
5.74  
5.73  
5.72  
5.71  
5.70  
5.69  
5.68  
5.67  
5.66  
5.65  
5.64  
5.63  
5.62  
5.61  
5.60  
5.59  
5.58  
5.57  
5.56  
5.55  
5.54  
5.53  
5.52  
5.51  
5.50  
5.49  
5.48  
5.47  
5.46  
5.45  
5.44  
5.43  
5.42  
5.41  
5.40  
5.39  
5.38  
5.37  
5.36  
5.35  
5.34  
5.33  
5.32  
5.31  
5.30  
5.29  
5.28  
5.27  
5.26  
5.25  
5.24  
5.23  
5.22  
5.21  
5.20  
5.19  
5.18  
5.17  
5.16  
5.15  
5.14  
5.13  
5.12  
5.11  
5.10  
5.09  
5.08  
5.07  
5.06  
5.05  
5.04  
5.03  
5.02  
5.01  
5.00  
4.99  
4.98  
4.97  
4.96  
4.95  
4.94  
4.93  
4.92  
4.91  
4.90  
4.89  
4.88  
4.87  
4.86  
4.85  
4.84  
4.83  
4.82  
4.81  
4.80  
4.79  
4.78  
4.77  
4.76  
4.75  
4.74  
4.73  
4.72  
4.71  
4.70  
4.69  
4.68  
4.67  
4.66  
4.65  
4.64  
4.63  
4.62  
4.61  
4.60  
4.59  
4.58  
4.57  
4.56  
4.55  
4.54  
4.53  
4.52  
4.51  
4.50  
4.49  
4.48  
4.47  
4.46  
4.45  
4.44  
4.43  
4.42  
4.41  
4.40  
4.39  
4.38  
4.37  
4.36  
4.35  
4.34  
4.33  
4.32  
4.31  
4.30  
4.29  
4.28  
4.27  
4.26  
4.25  
4.24  
4.23  
4.22  
4.21  
4.20  
4.19  
4.18  
4.17  
4.16  
4.15  
4.14  
4.13  
4.12  
4.11  
4.10  
4.09  
4.08  
4.07  
4.06  
4.05  
4.04  
4.03  
4.02  
4.01  
4.00  
3.99  
3.98  
3.97  
3.96  
3.95  
3.94  
3.93  
3.92  
3.91  
3.90  
3.89  
3.88  
3.87  
3.86  
3.85  
3.84  
3.83  
3.82  
3.81  
3.80  
3.79  
3.78  
3.77  
3.76  
3.75  
3.74  
3.73  
3.72  
3.71  
3.70  
3.69  
3.68  
3.67  
3.66  
3.65  
3.64  
3.63  
3.62  
3.61  
3.60  
3.59  
3.58  
3.57  
3.56  
3.55  
3.54  
3.53  
3.52  
3.51  
3.50  
3.49  
3.48  
3.47  
3.46  
3.45  
3.44  
3.43  
3.42  
3.41  
3.40  
3.39  
3.38  
3.37  
3.36  
3.35  
3.34  
3.33  
3.32  
3.31  
3.30  
3.29  
3.28  
3.27  
3.26  
3.25  
3.24  
3.23  
3.22  
3.21  
3.20  
3.19  
3.18  
3.17  
3.16  
3.15  
3.14  
3.13  
3.12  
3.11  
3.10  
3.09  
3.08  
3.07  
3.06  
3.05  
3.04  
3.03  
3.02  
3.01  
3.00  
2.99  
2.98  
2.97  
2.96  
2.95  
2.94  
2.93  
2.92  
2.91  
2.90  
2.89  
2.88  
2.87  
2.86  
2.85  
2.84  
2.83  
2.82  
2.81  
2.80  
2.79  
2.78  
2.77  
2.76  
2.75  
2.74  
2.73  
2.72  
2.71  
2.70  
2.69  
2.68  
2.67  
2.66  
2.65  
2.64  
2.63  
2.62  
2.61  
2.60  
2.59  
2.58  
2.57  
2.56  
2.55  
2.54  
2.53  
2.52  
2.51  
2.50  
2.49  
2.48  
2.47  
2.46  
2.45  
2.44  
2.43  
2.42  
2.41  
2.40  
2.39  
2.38  
2.37  
2.36  
2.35  
2.34  
2.33  
2.32  
2.31  
2.30  
2.29  
2.28  
2.27  
2.26  
2.25  
2.24  
2.23  
2.22  
2.21  
2.20  
2.19  
2.18  
2.17  
2.16  
2.15  
2.14  
2.13  
2.12  
2.11  
2.10  
2.09  
2.08  
2.07  
2.06  
2.05  
2.04  
2.03  
2.02  
2.01  
2.00  
1.99  
1.98  
1.97  
1.96  
1.95  
1.94  
1.93  
1.92  
1.91  
1.90  
1.89  
1.88  
1.87  
1.86  
1.85  
1.84  
1.83  
1.82  
1.81  
1.80  
1.79  
1.78  
1.77  
1.76  
1.75  
1.74  
1.73  
1.72  
1.71  
1.70  
1.69  
1.68  
1.67  
1.66  
1.65  
1.64  
1.63  
1.62  
1.61  
1.60  
1.59  
1.58  
1.57  
1.56  
1.55  
1.54  
1.53  
1.52  
1.51  
1.50  
1.49  
1.48  
1.47  
1.46  
1.45  
1.44  
1.43  
1.42  
1.41  
1.40  
1.39  
1.38  
1.37  
1.36  
1.35  
1.34  
1.33  
1.32  
1.31  
1.30  
1.29  
1.28  
1.27  
1.26  
1.25  
1.24  
1.23  
1.22  
1.21  
1.20  
1.19  
1.18  
1.17  
1.16  
1.15  
1.14  
1.13  
1.12  
1.11  
1.10  
1.09  
1.08  
1.07  
1.06  
1.05  
1.04  
1.03  
1.02  
1.01  
1.00  
0.99  
0.98  
0.97  
0.96  
0.95  
0.94  
0.93  
0.92  
0.91  
0.90  
0.89  
0.88  
0.87  
0.86  
0.85  
0.84  
0.83  
0.82  
0.81  
0.80  
0.79  
0.78  
0.77  
0.76  
0.75  
0.74  
0.73  
0.72  
0.71  
0.70  
0.69  
0.68  
0.67  
0.66  
0.65  
0.64  
0.63  
0.62  
0.61  
0.60  
0.59  
0.58  
0.57  
0.56  
0.55  
0.54  
0.53  
0.52  
0.51  
0.50  
0.49  
0.48  
0.47  
0.46  
0.45  
0.44  
0.43  
0.42  
0.41  
0.40  
0.39  
0.38  
0.37  
0.36  
0.35  
0.34  
0.33  
0.32  
0.31  
0.30  
0.29  
0.28  
0.27  
0.26  
0.25  
0.24  
0.23  
0.22  
0.21  
0.20  
0.19  
0.18  
0.17  
0.16  
0.15  
0.14  
0.13  
0.12  
0.11  
0.10  
0.09  
0.08  
0.07  
0.06  
0.05  
0.04  
0.03  
0.02  
0.01  
0.00  
-0.01  
-0.02  
-0.03  
-0.04  
-0.05  
-0.06  
-0.07  
-0.08  
-0.09  
-0.10  
-0.11  
-0.12  
-0.13  
-0.14  
-0.15

<sup>1</sup>H NMR (DMSO-*d*<sub>6</sub>)

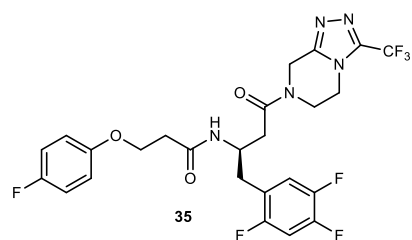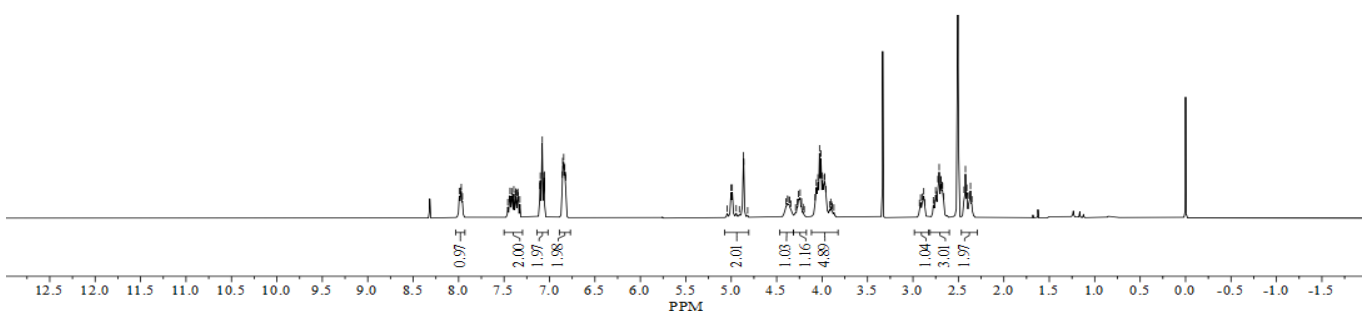

169.74  
169.64  
169.51  
158.11  
157.50  
155.77  
155.15  
155.13  
151.46  
151.30  
149.43  
147.33  
147.21  
147.12  
146.98  
144.94  
144.81  
143.15  
142.97  
142.88  
142.45  
122.97  
120.26  
119.66  
119.60  
119.47  
119.41  
117.58  
116.30  
116.10  
116.07  
116.01  
106.18  
105.97  
105.89  
105.68

65.02  
64.94  
46.47  
44.01  
43.38  
42.49  
41.59  
38.81  
37.89  
37.75  
35.87  
35.79  
32.84  
32.71

<sup>13</sup>C NMR (DMSO-*d*<sub>6</sub>)

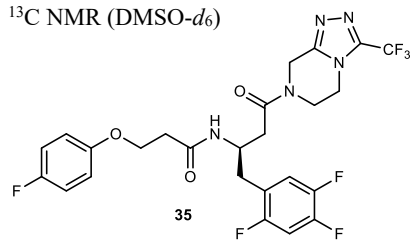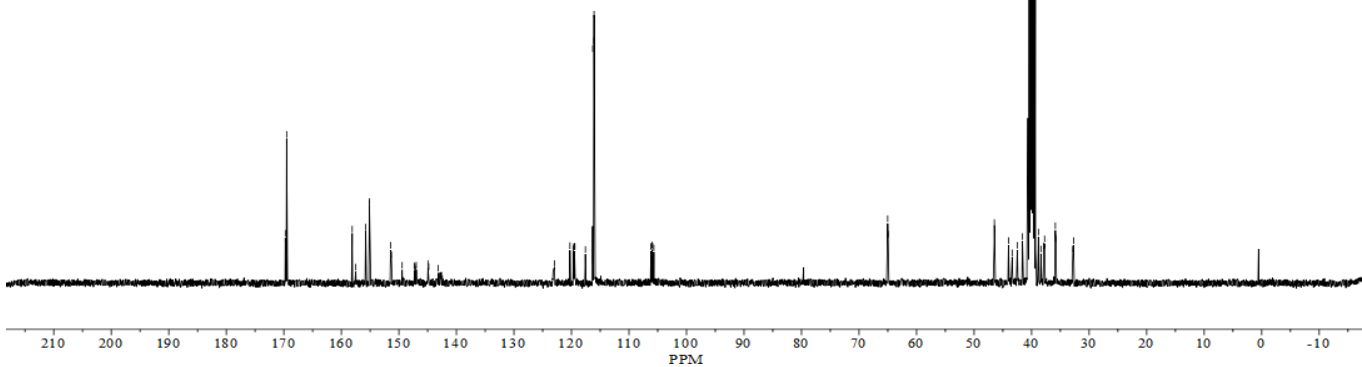

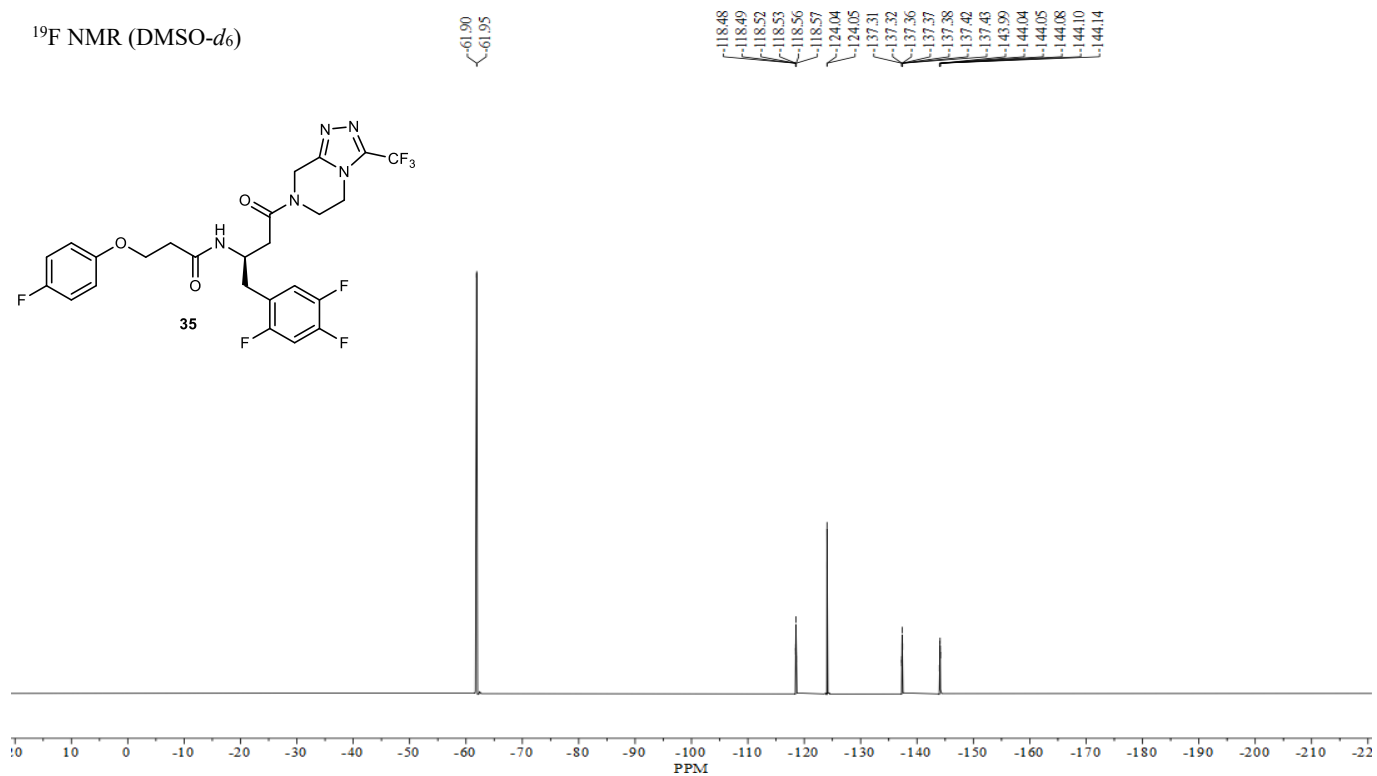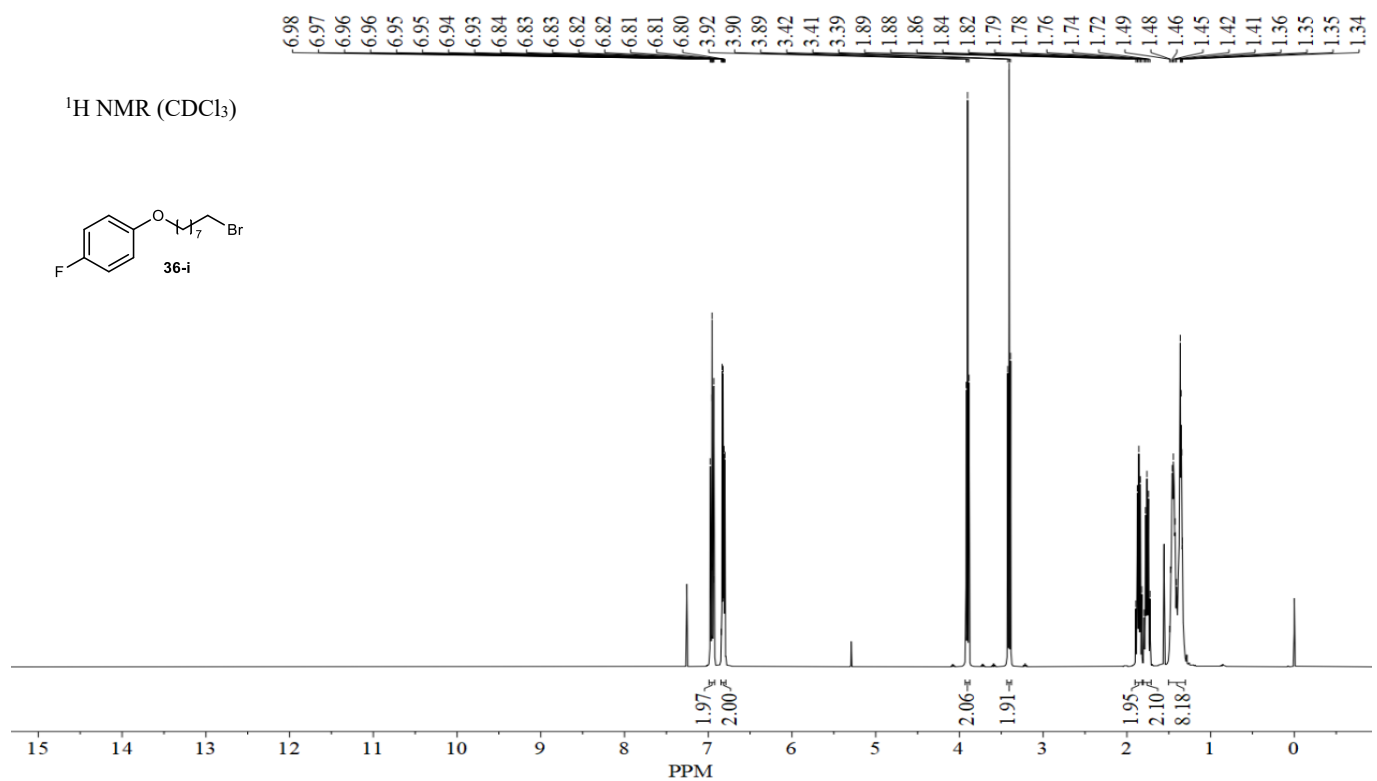

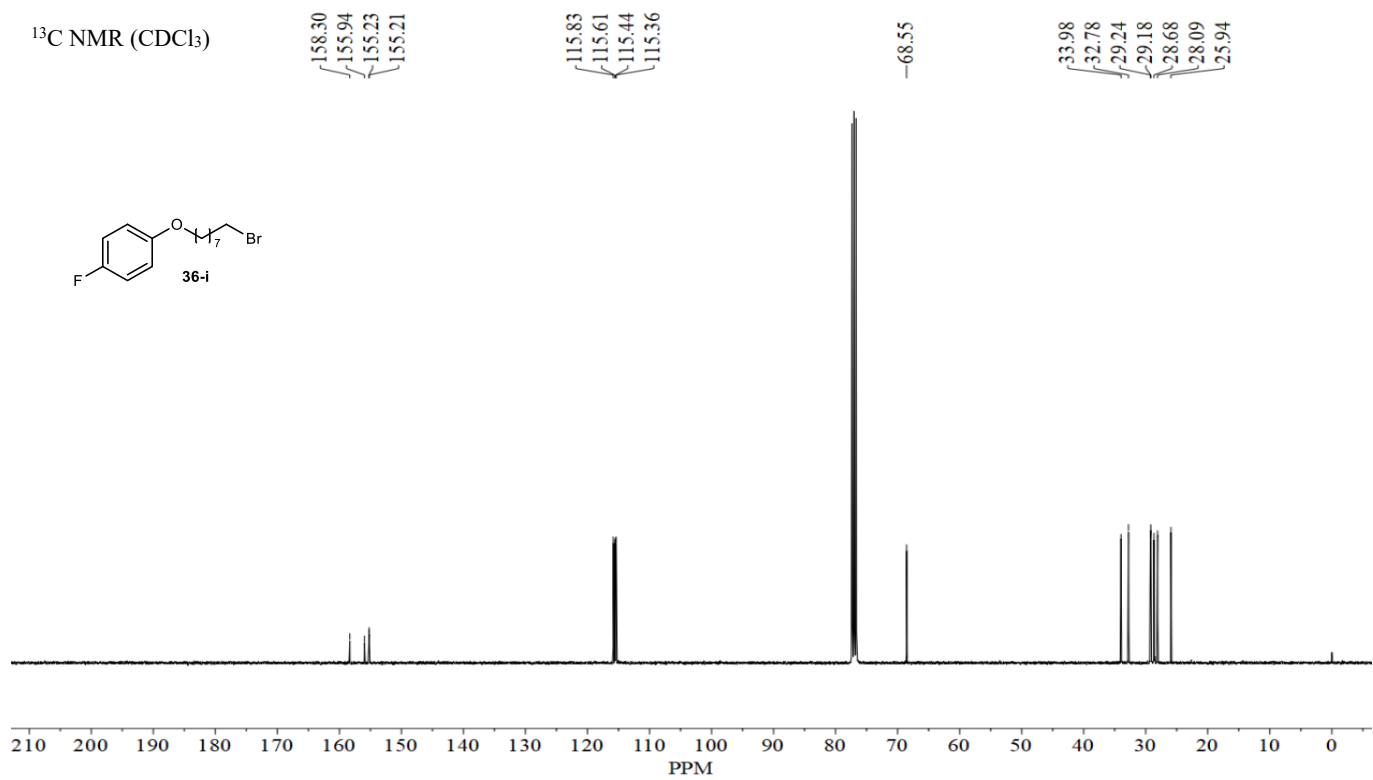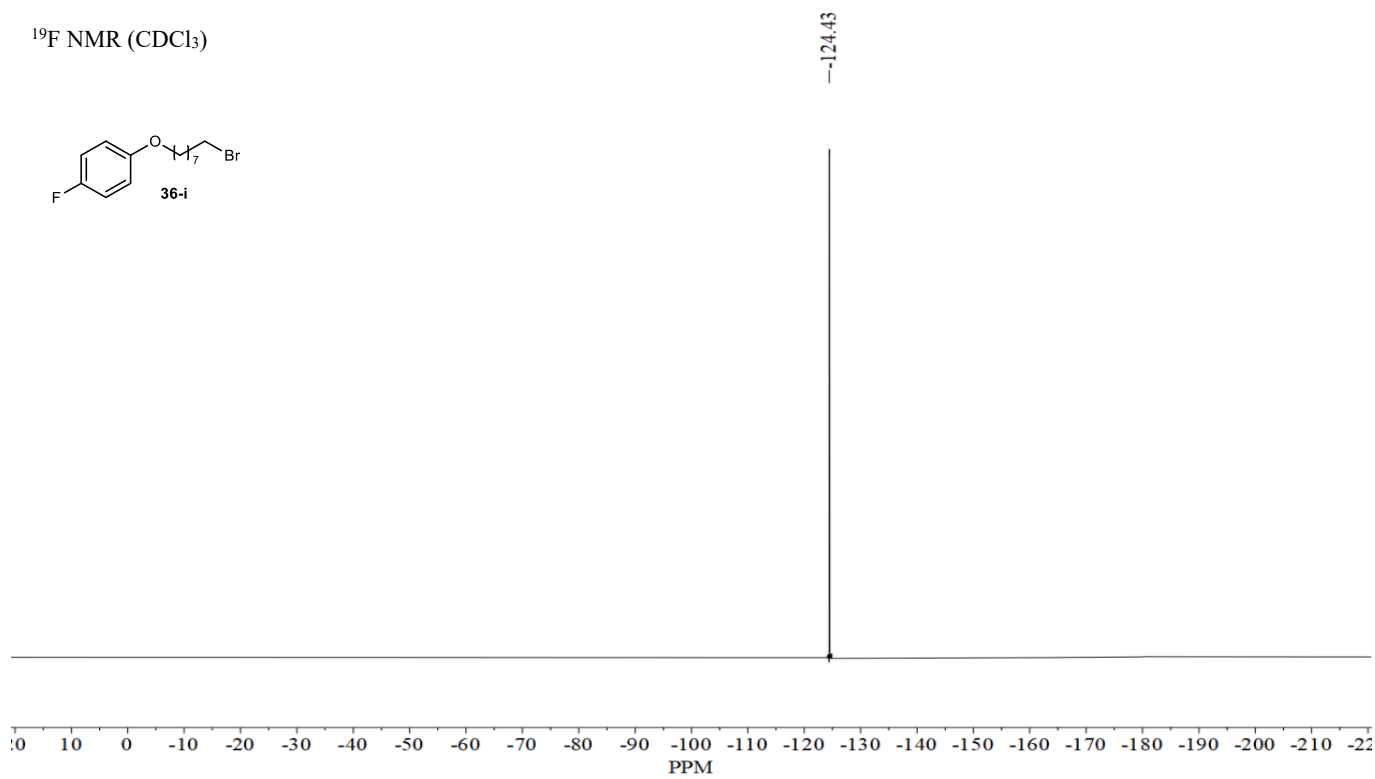

$^1\text{H}$  NMR ( $\text{CDCl}_3$ )

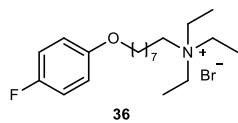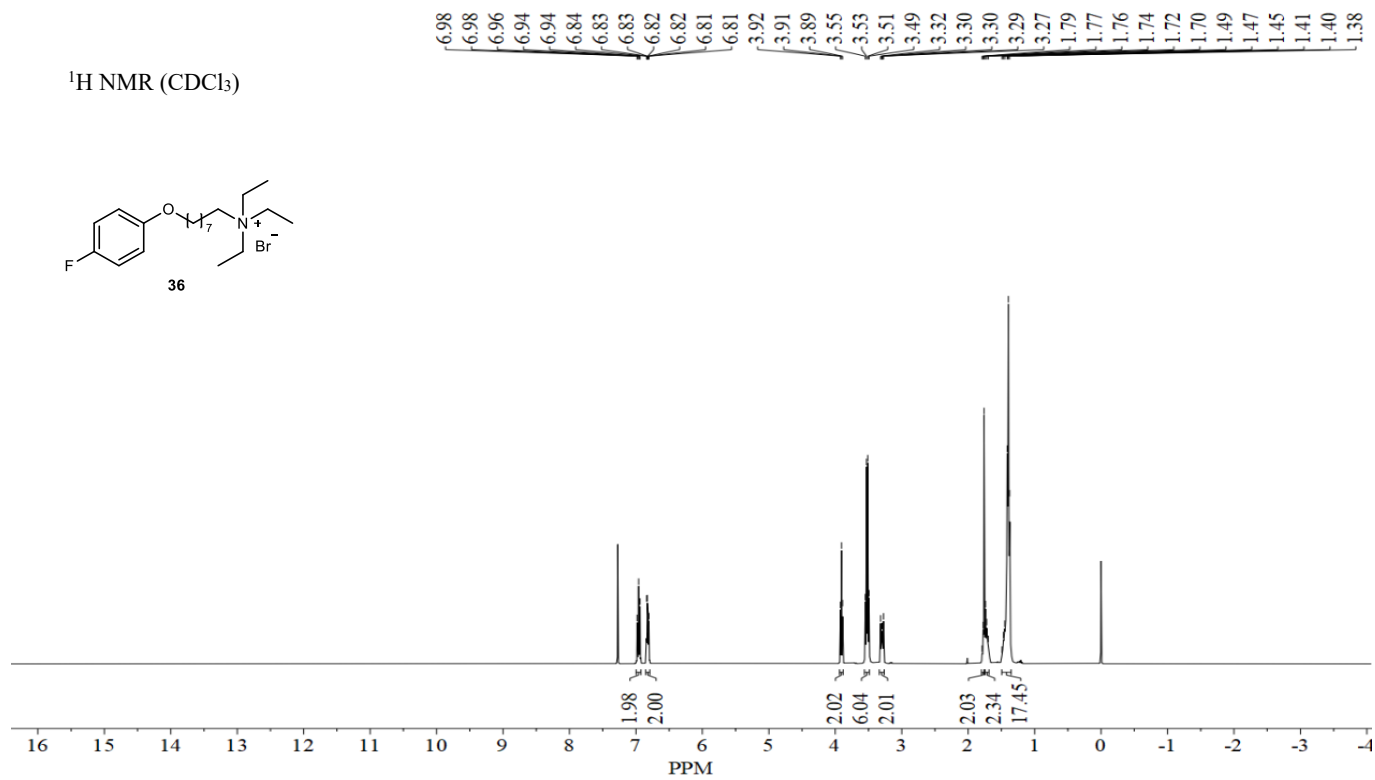

$^{13}\text{C}$  NMR ( $\text{CDCl}_3$ )

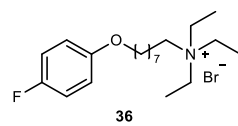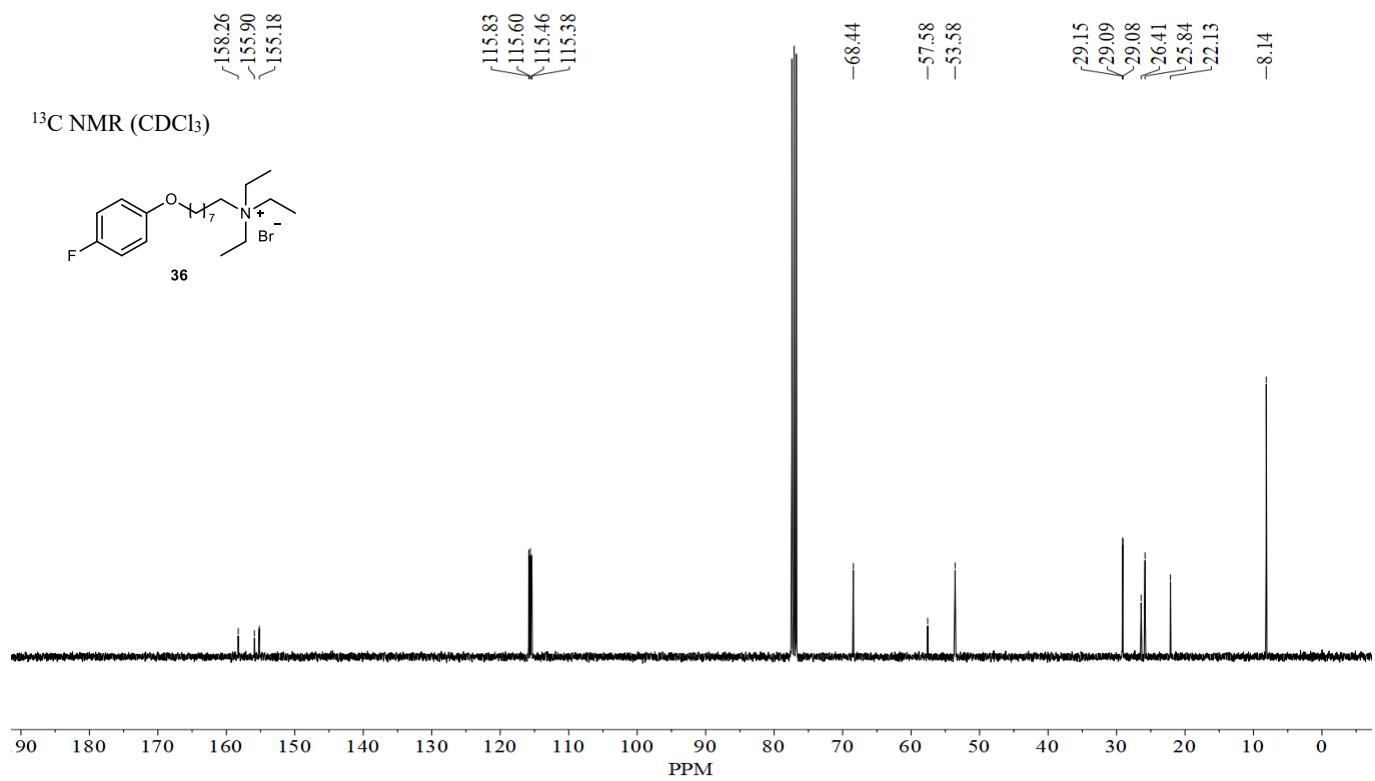

$^{19}\text{F}$  NMR ( $\text{CDCl}_3$ )

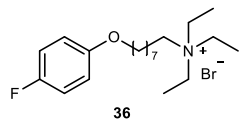

-124.38

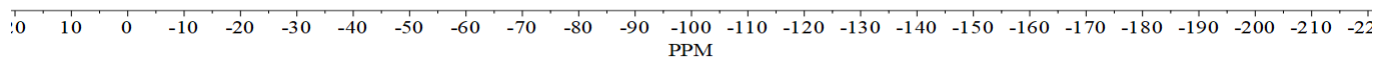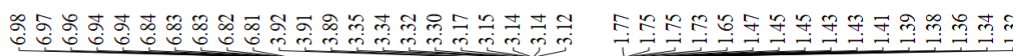

$^1\text{H}$  NMR ( $\text{CDCl}_3$ )

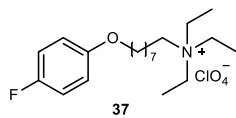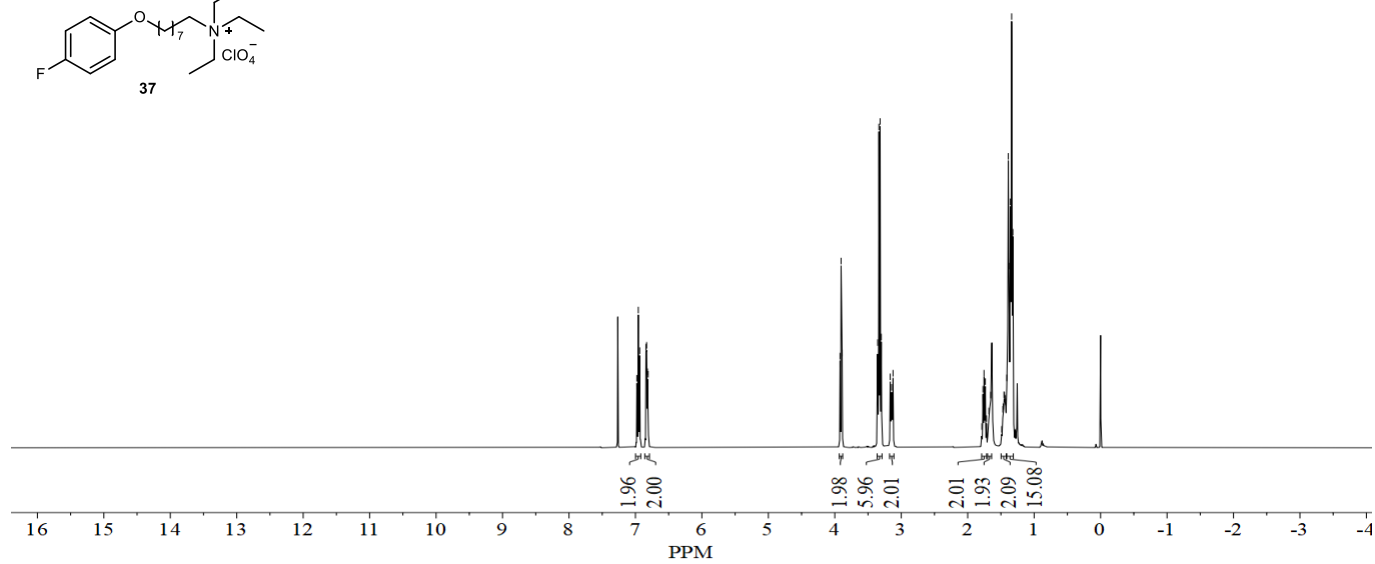

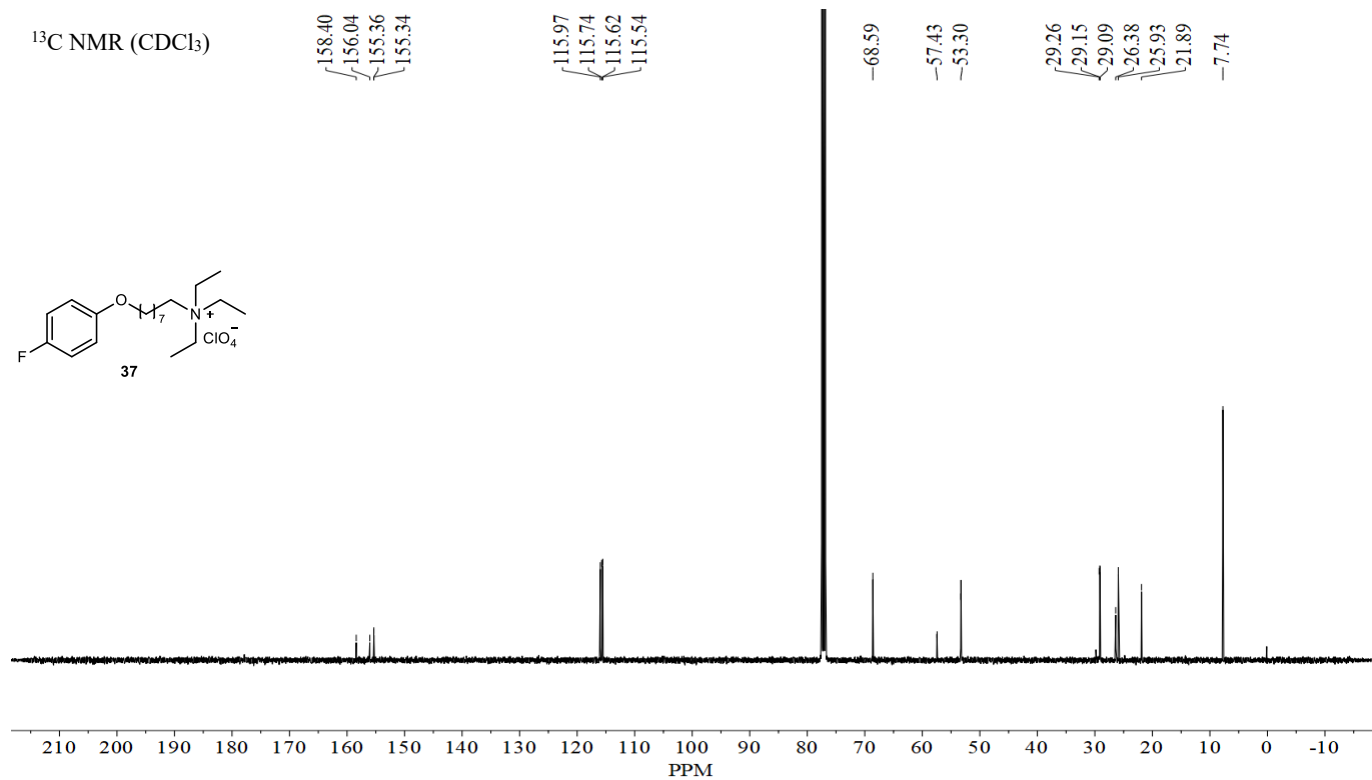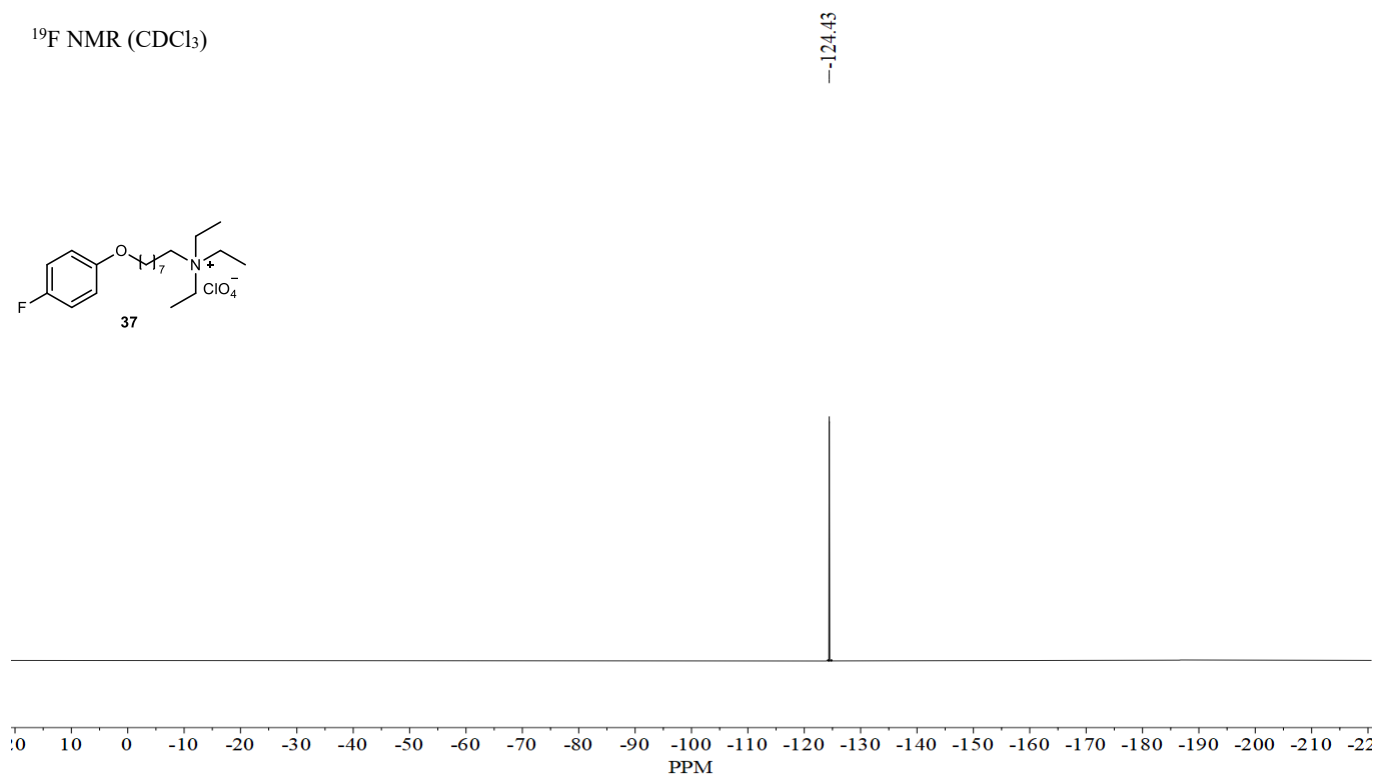

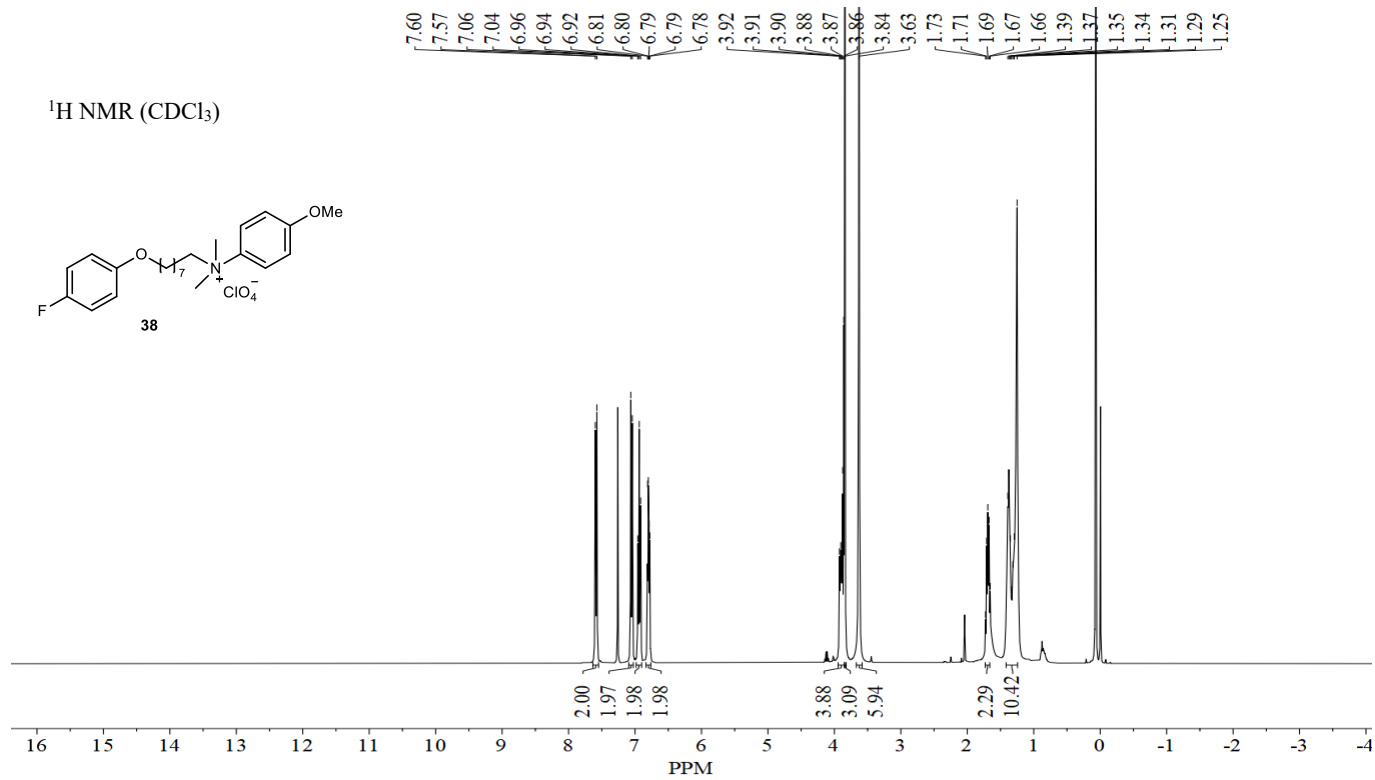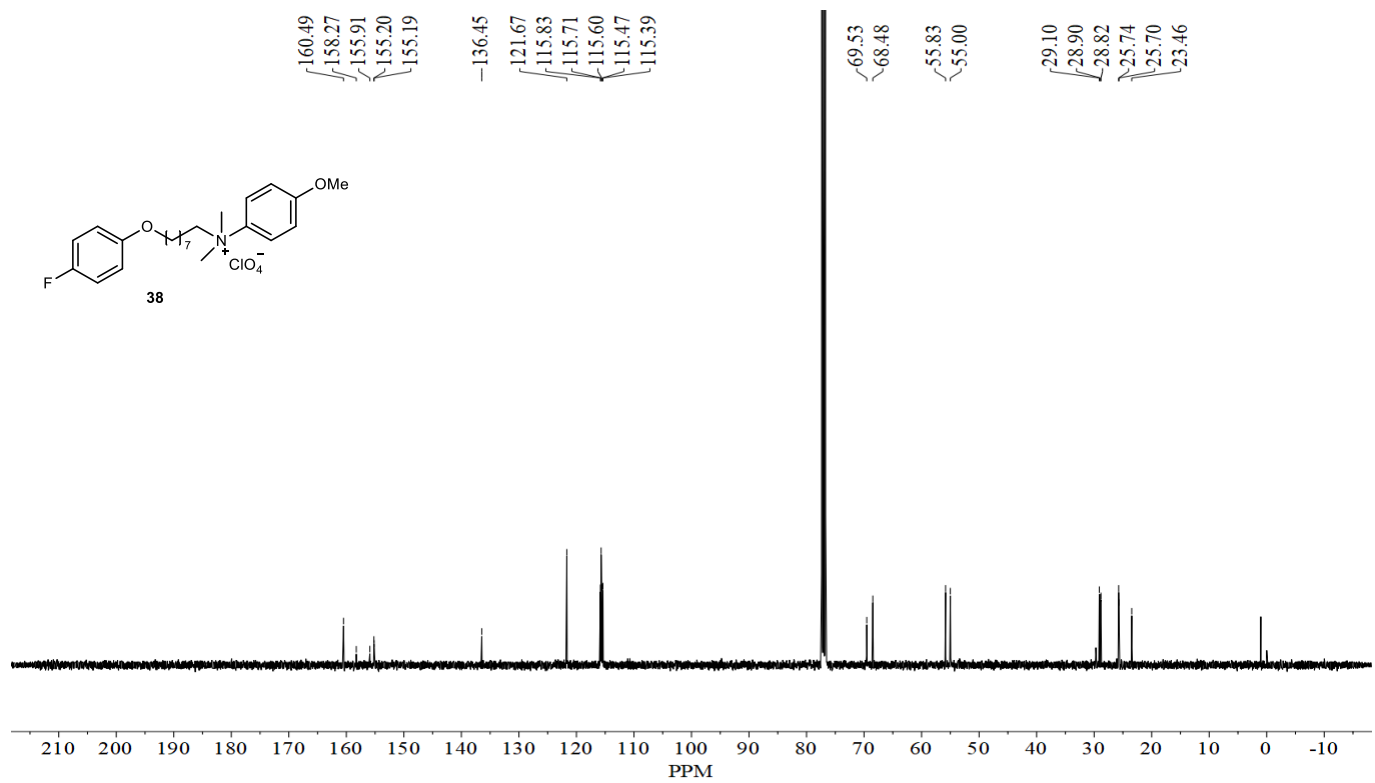



$^{19}\text{F}$  NMR ( $\text{CDCl}_3$ )

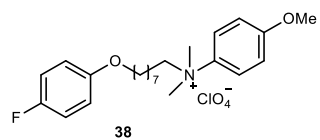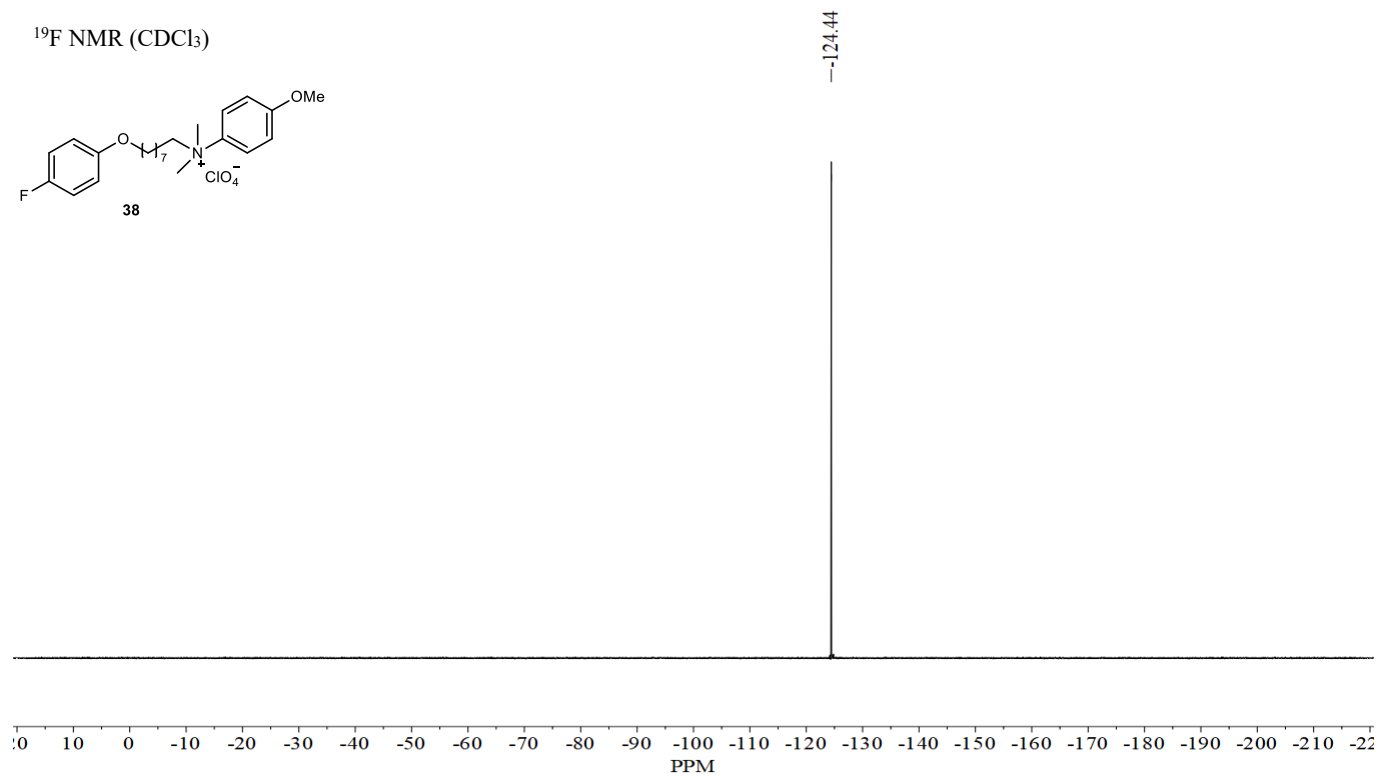

$^1\text{H}$  NMR ( $\text{CDCl}_3$ )

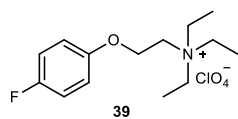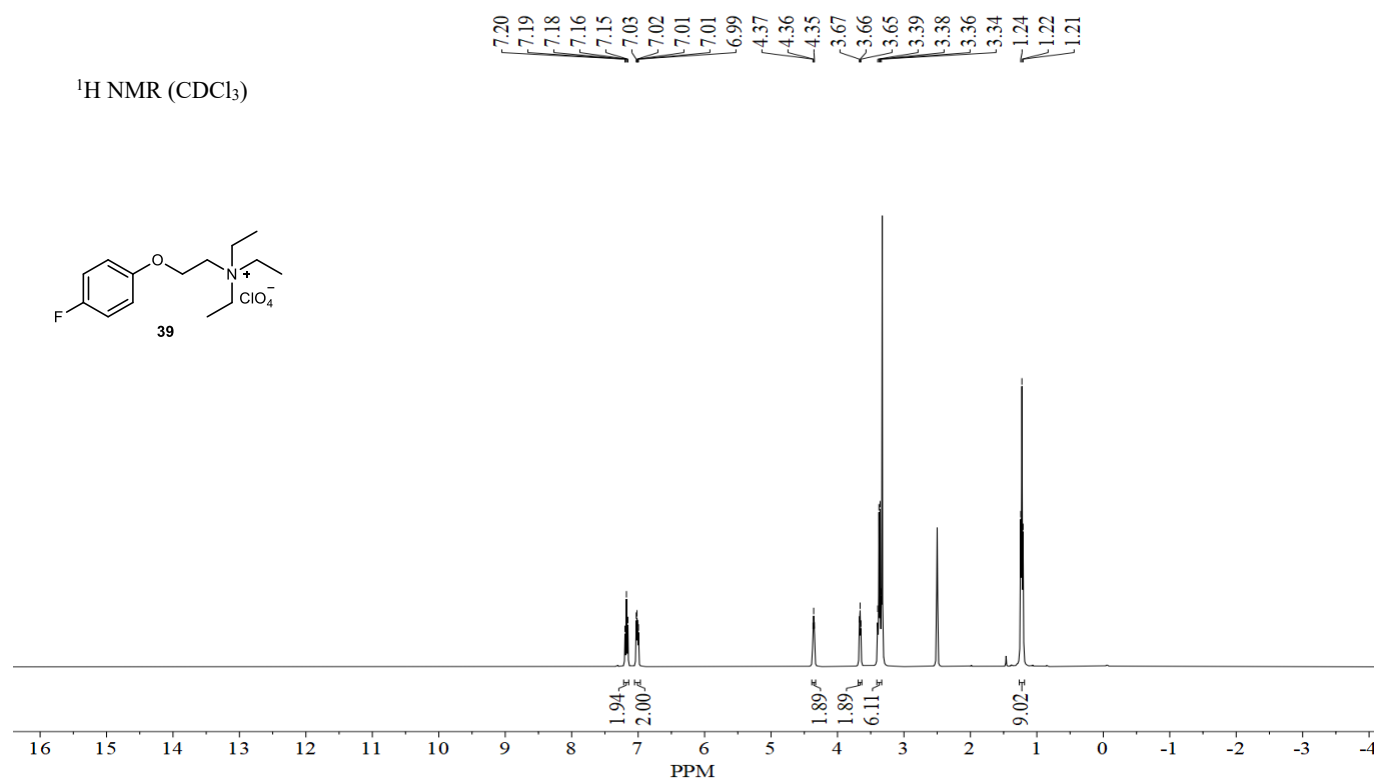

$^{13}\text{C}$  NMR ( $\text{CDCl}_3$ )

158.60  
156.25  
154.23  
154.21

116.53  
116.50  
116.42  
116.30

-62.02  
-55.64  
-53.38

-7.76

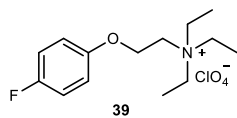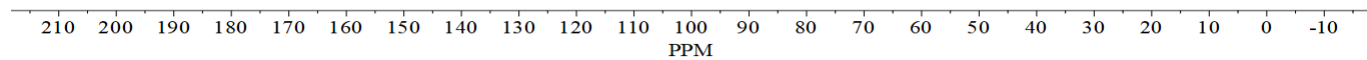

$^{19}\text{F}$  NMR ( $\text{CDCl}_3$ )

-123.02

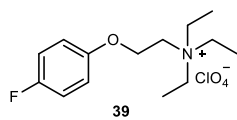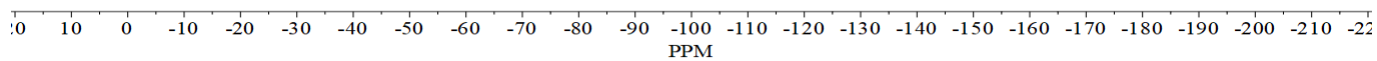

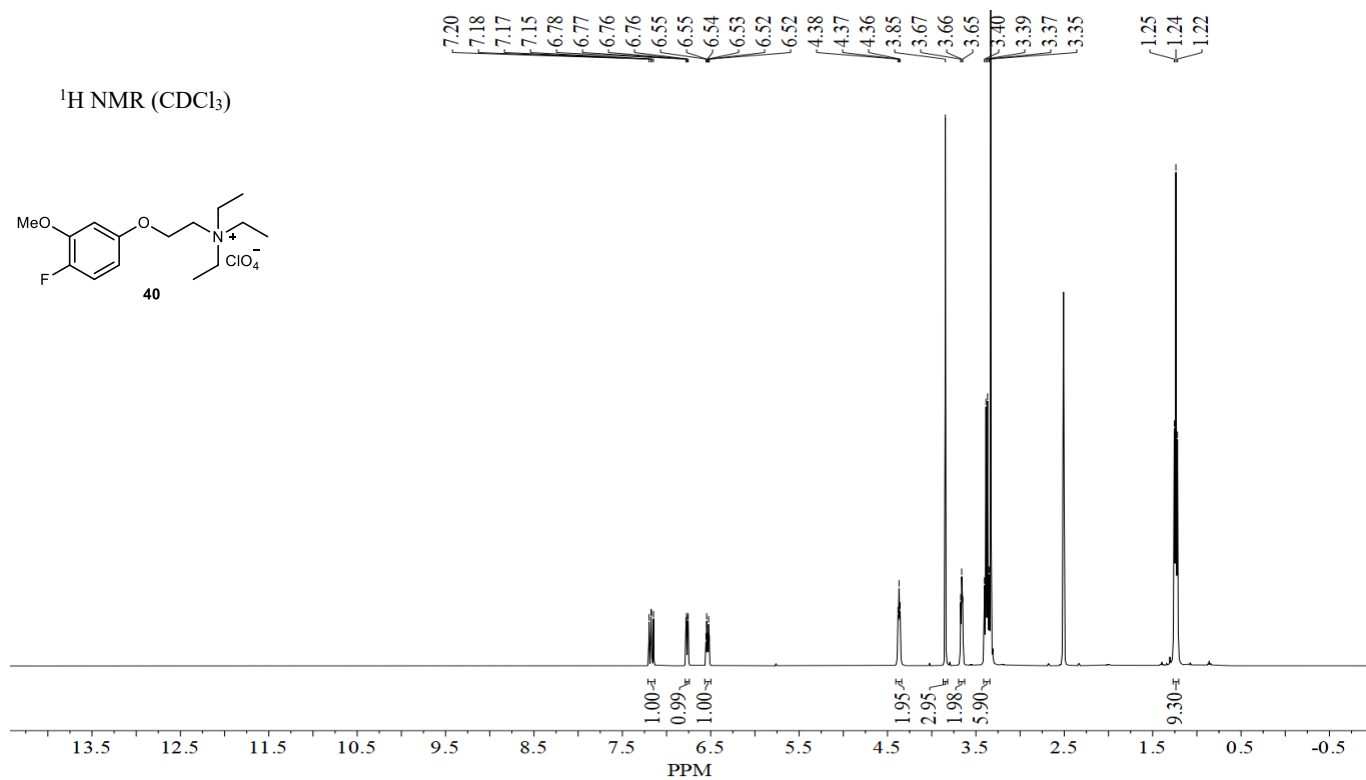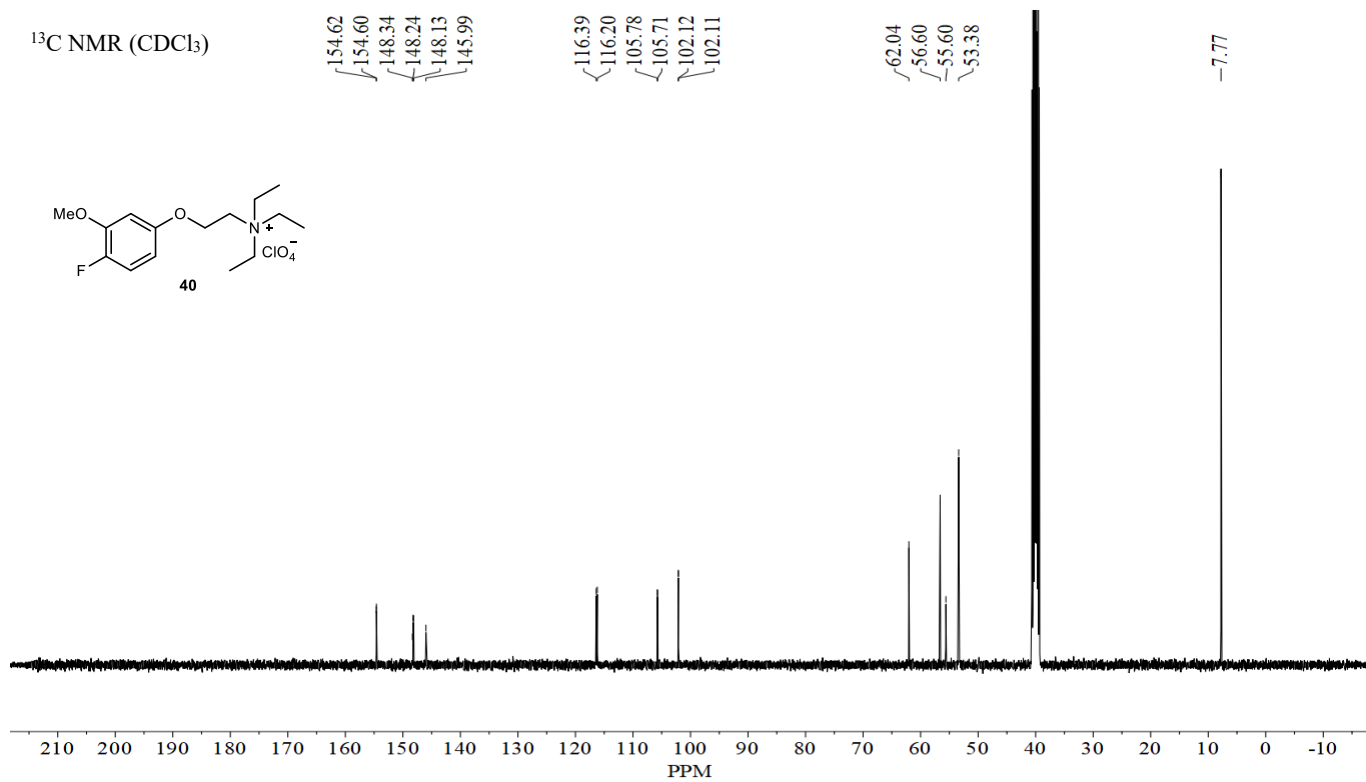

$^{19}\text{F}$  NMR ( $\text{CDCl}_3$ )

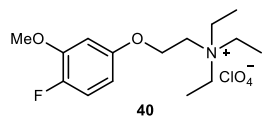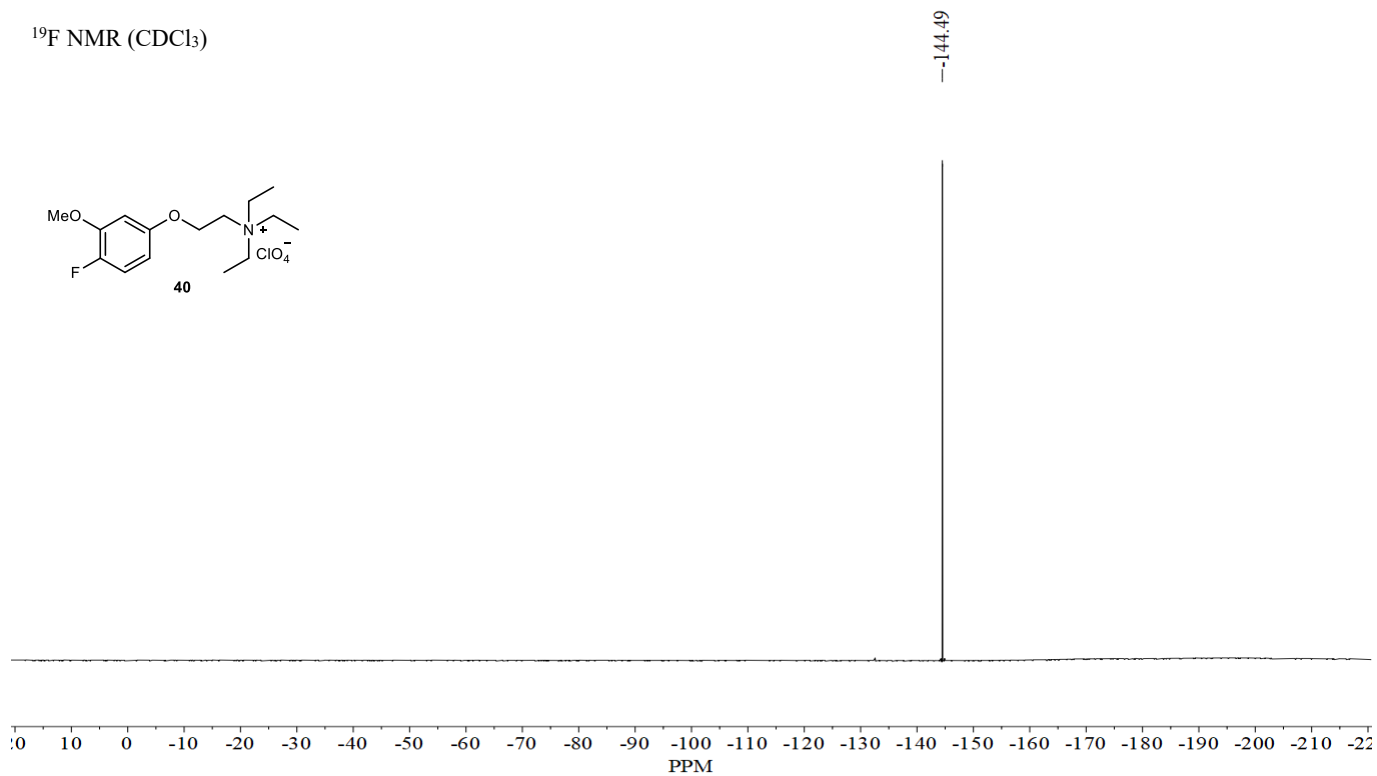

$^1\text{H}$  NMR ( $\text{CDCl}_3$ )

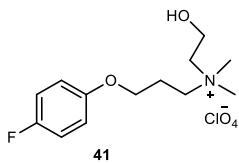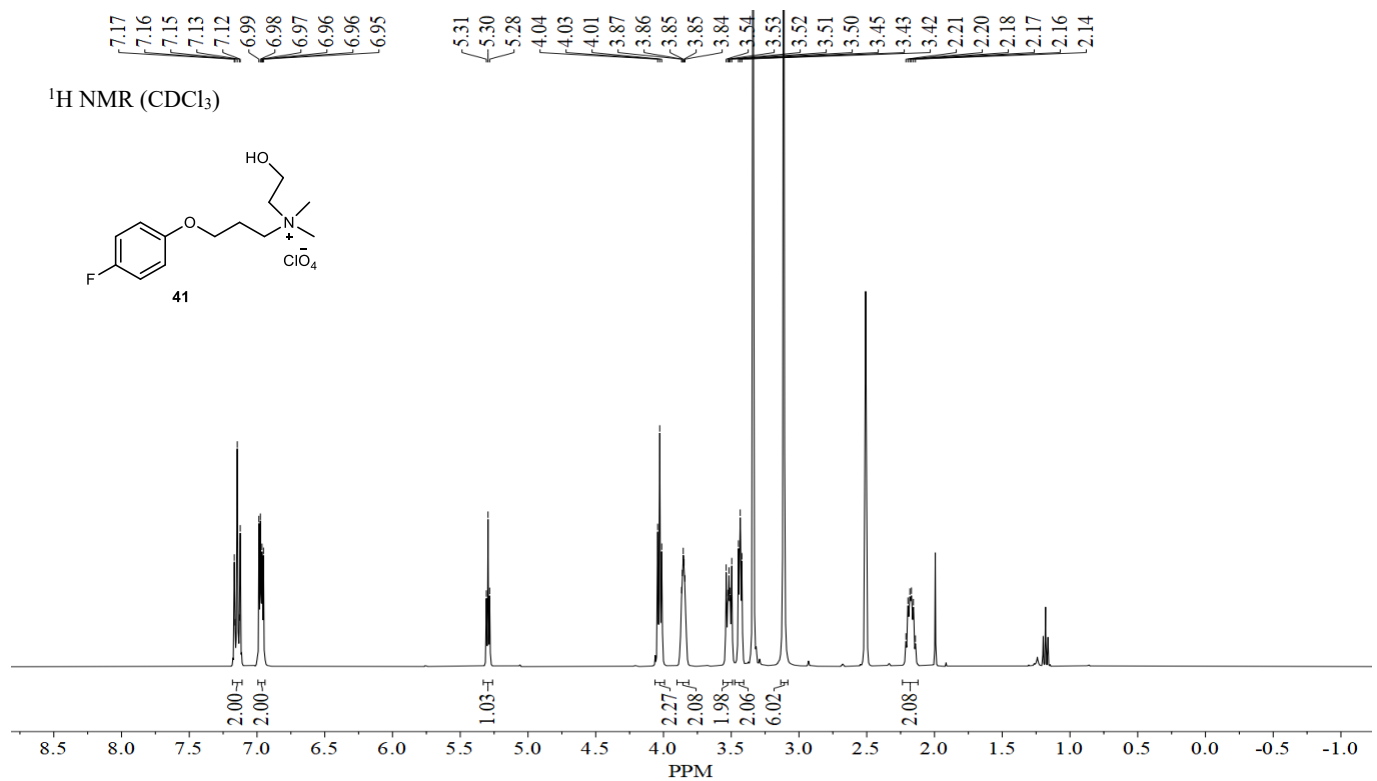

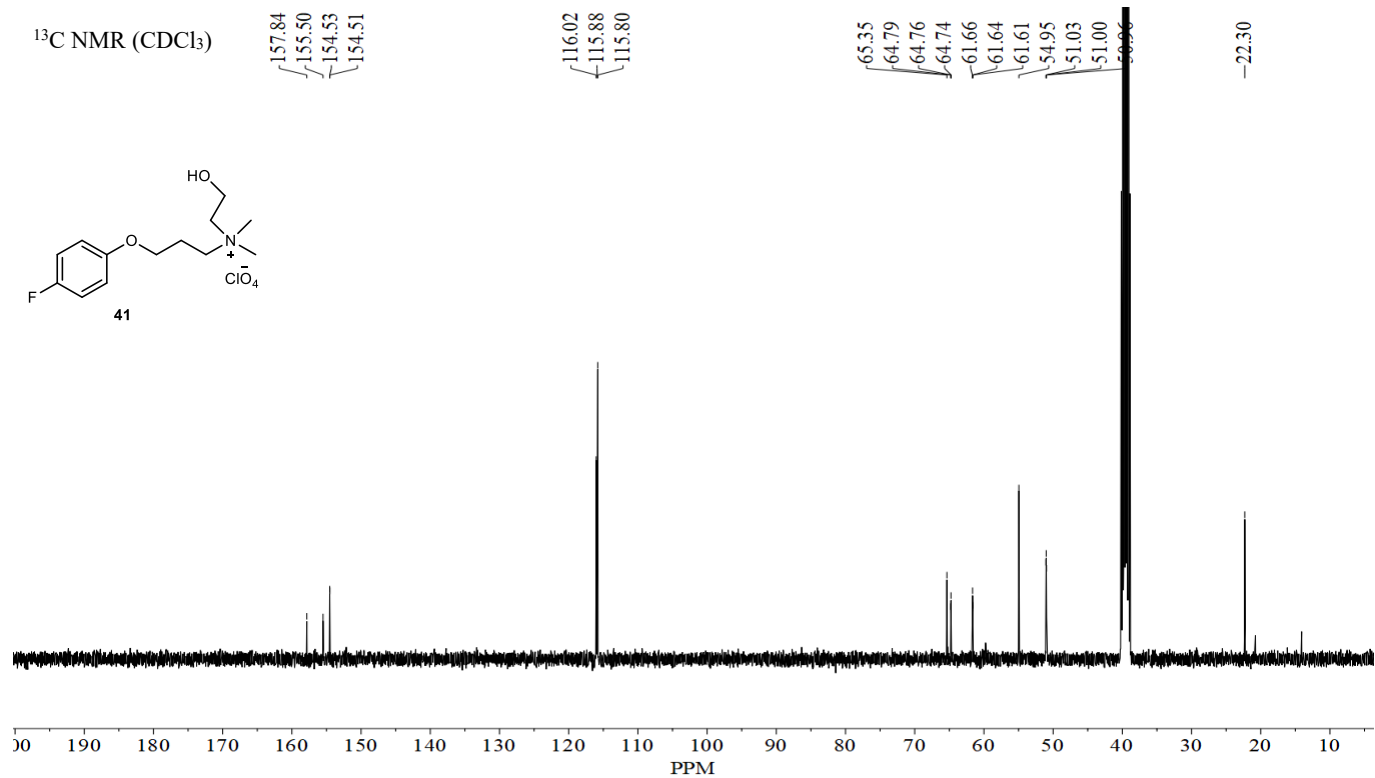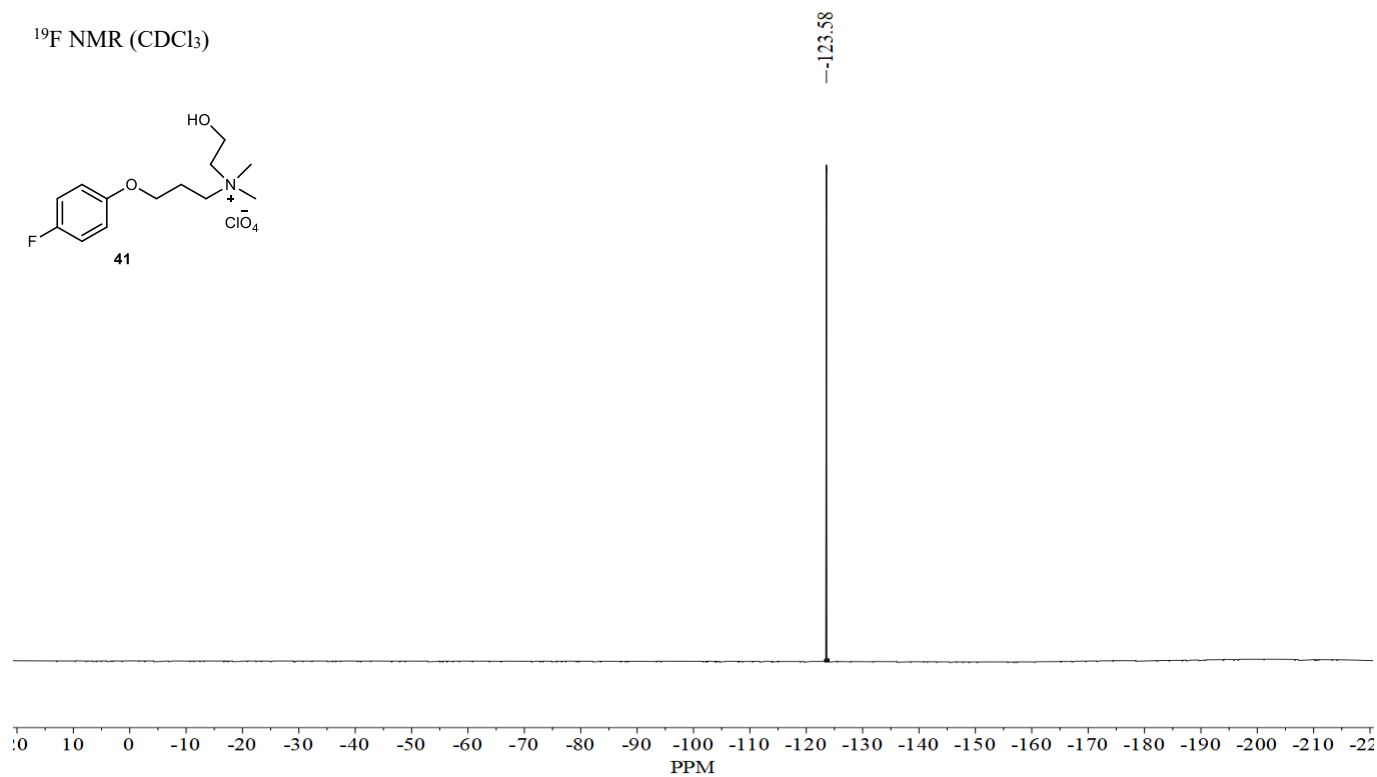

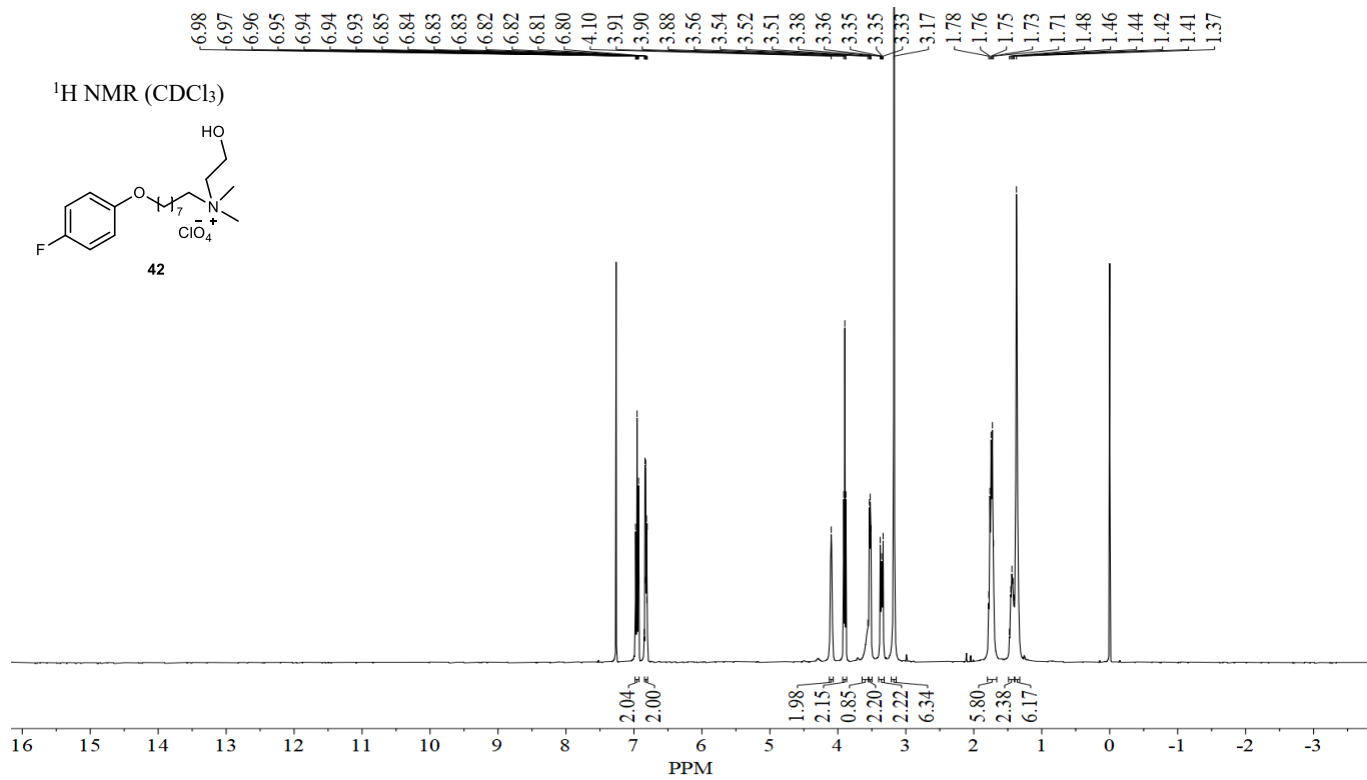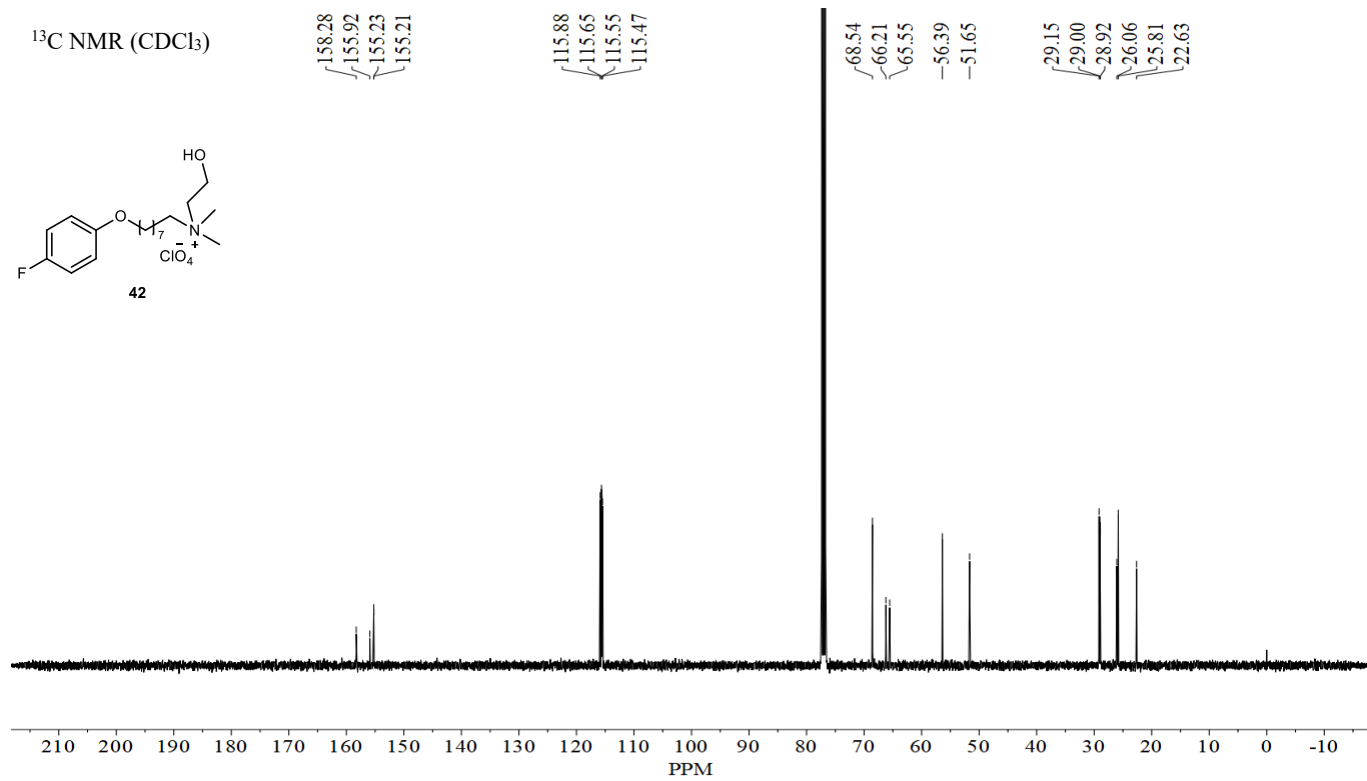

$^{19}\text{F}$  NMR ( $\text{CDCl}_3$ )

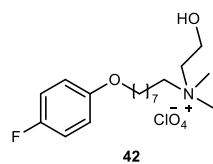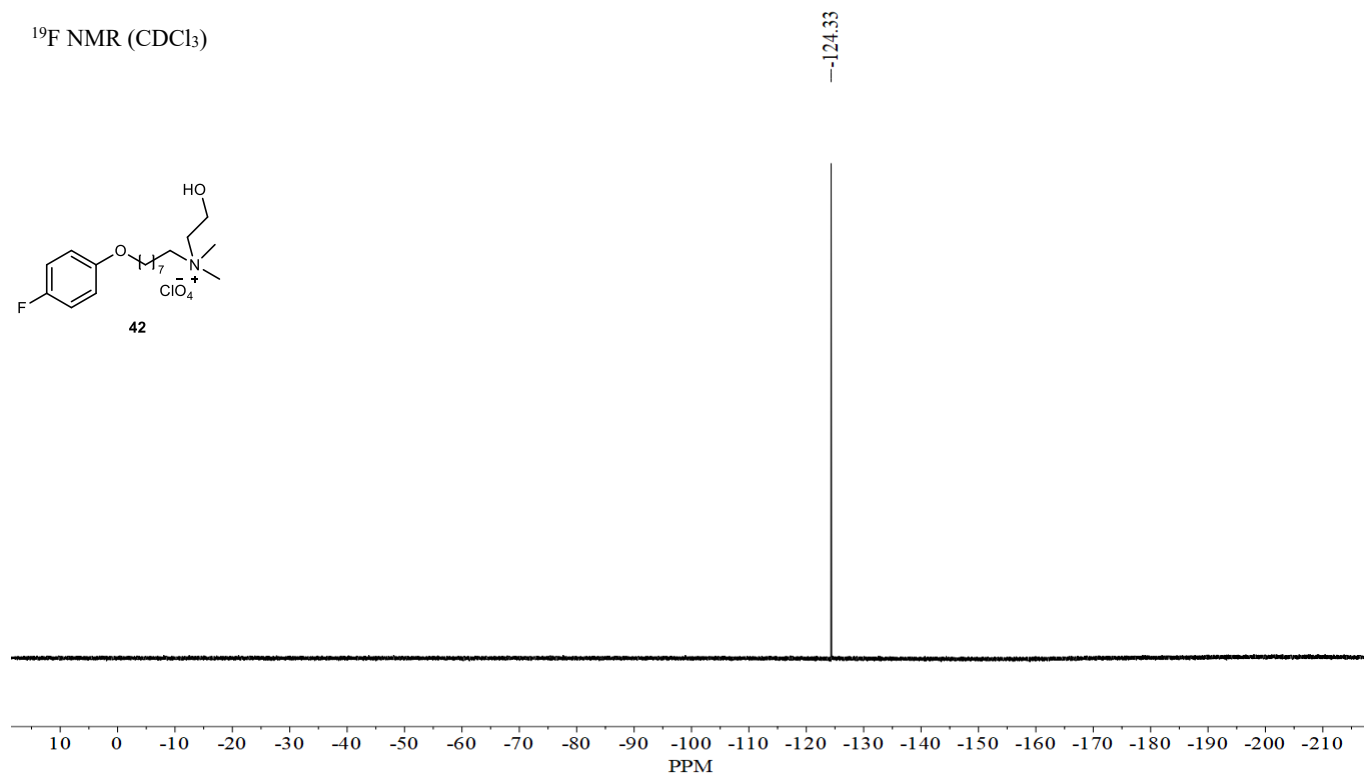

9.13, 9.12, 8.64, 8.62, 8.60, 8.18, 8.16, 8.15, 7.13, 7.11, 7.08, 6.82, 6.81, 6.81, 6.80, 6.80, 6.79, 6.79, 4.82, 4.80, 4.78, 4.08, 4.06, 4.05, 2.46, 2.44, 2.43, 2.41, 2.40

$^1\text{H}$  NMR ( $\text{CDCl}_3$ )

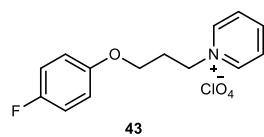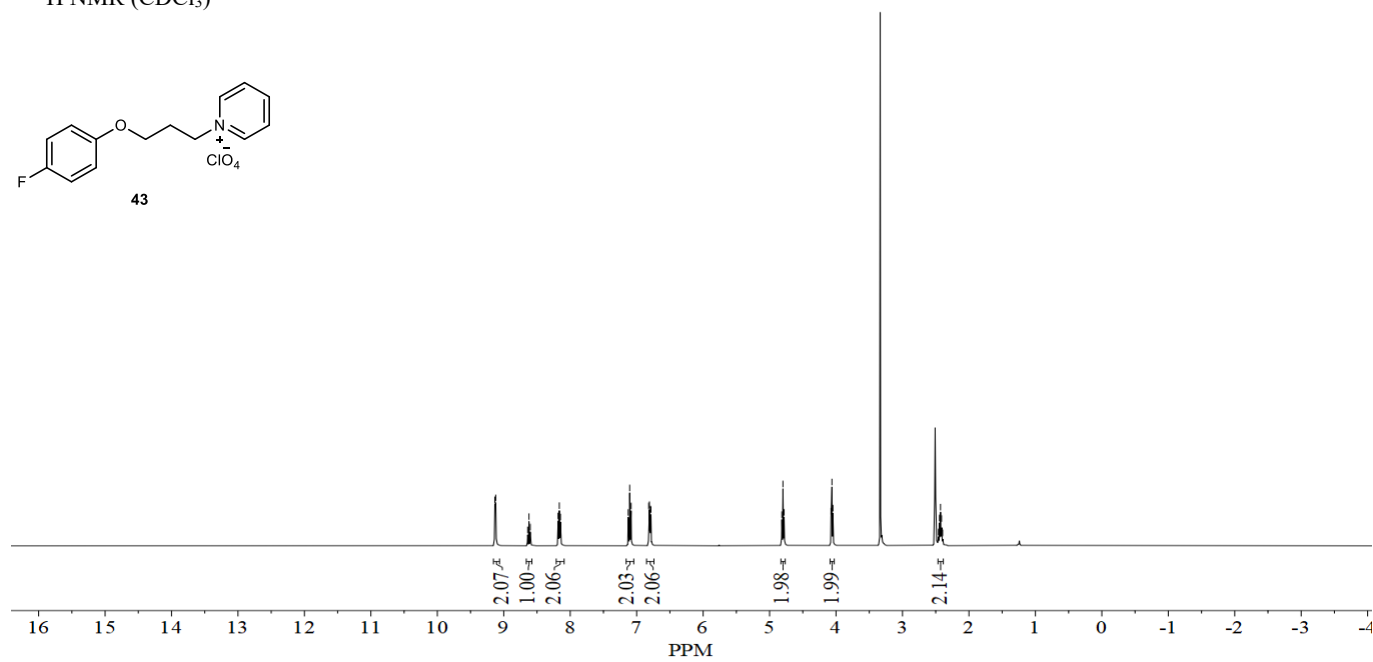

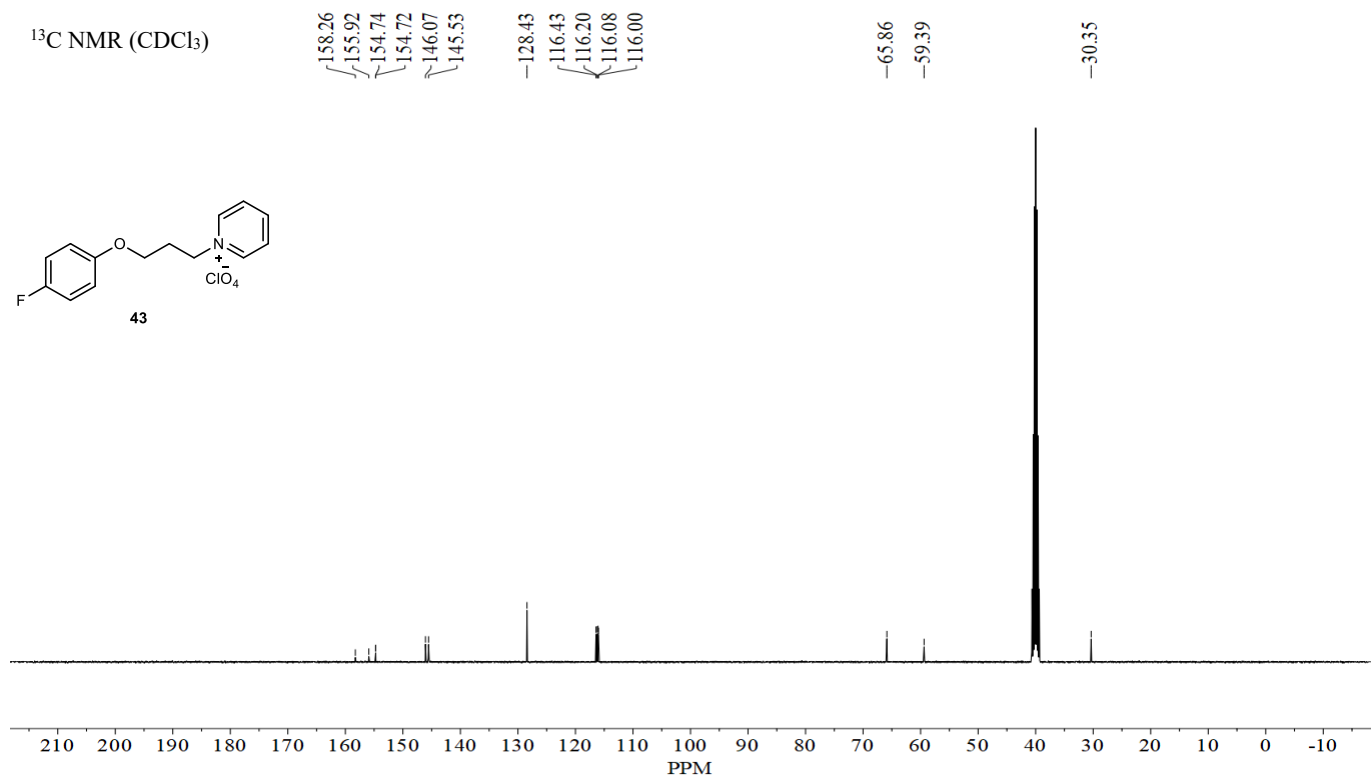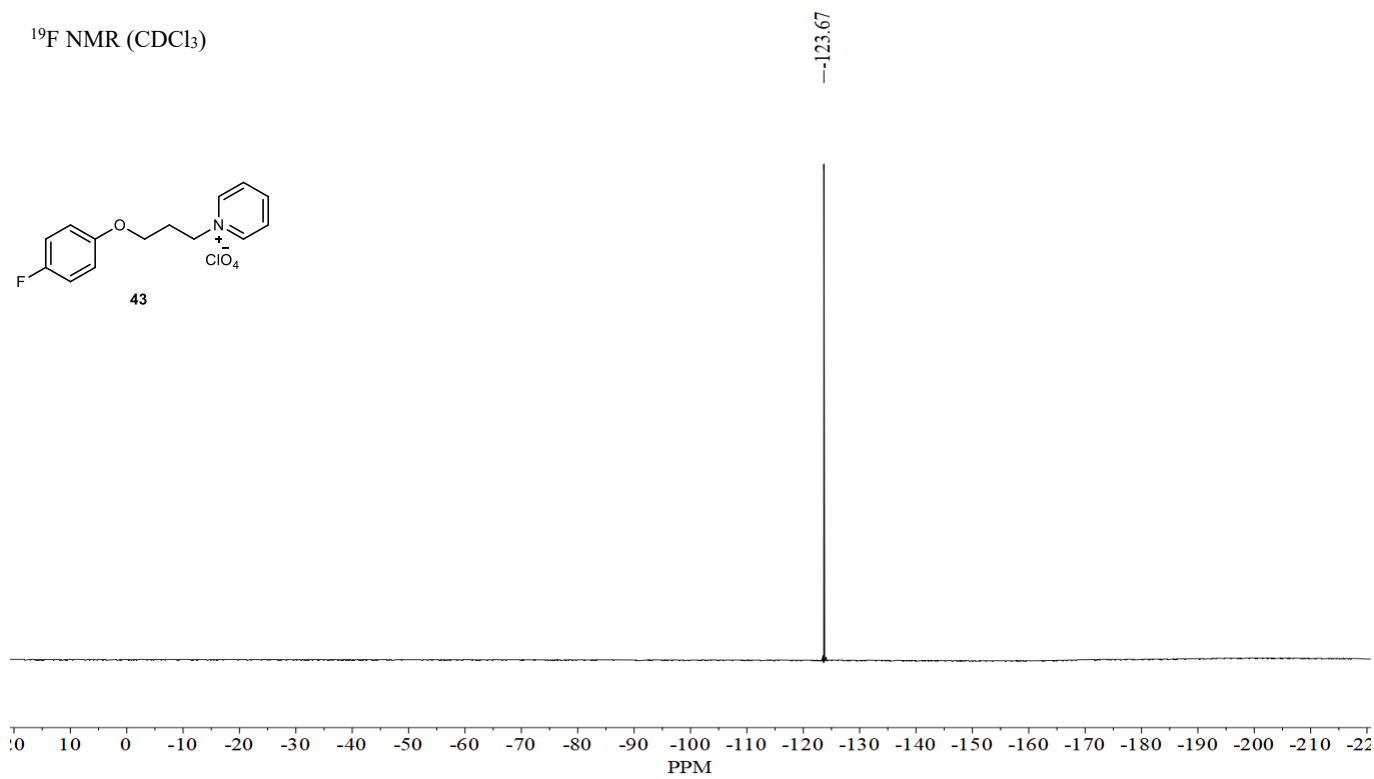



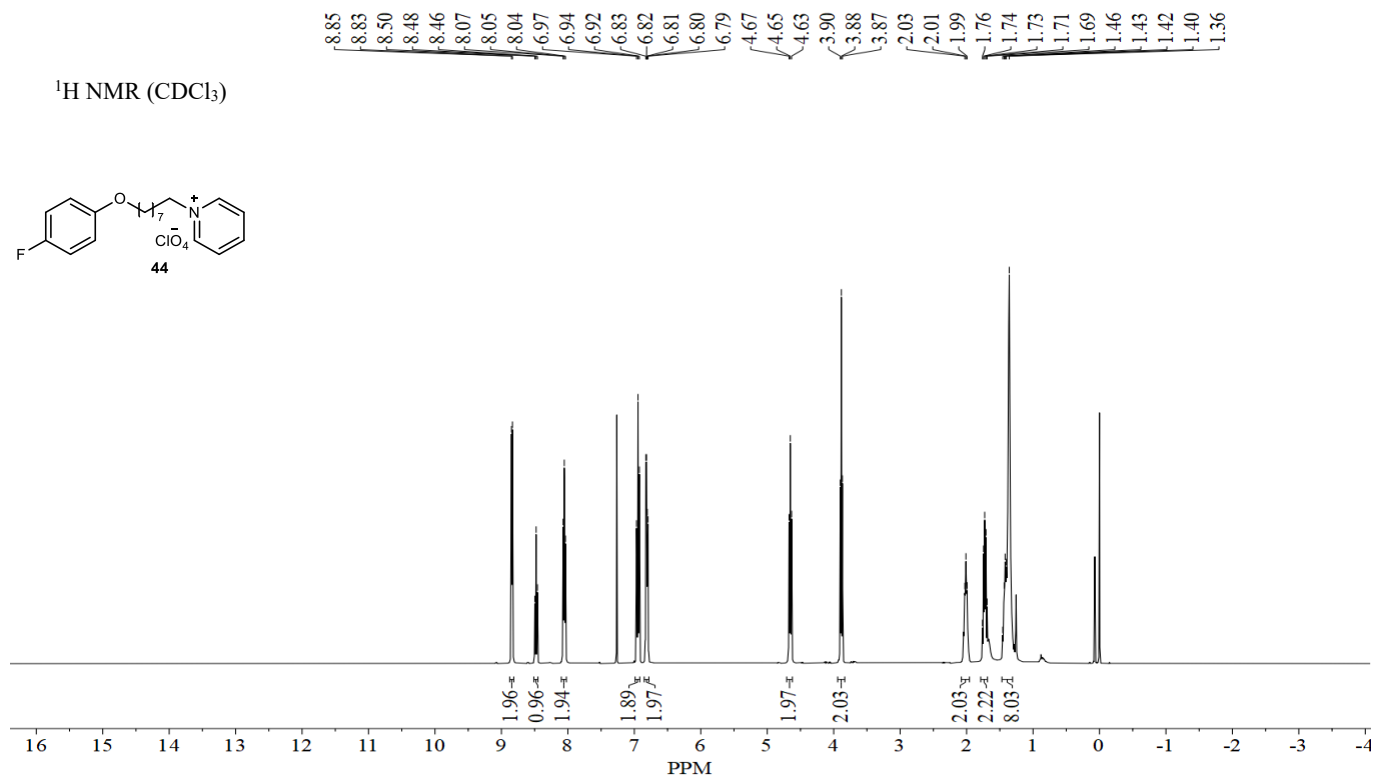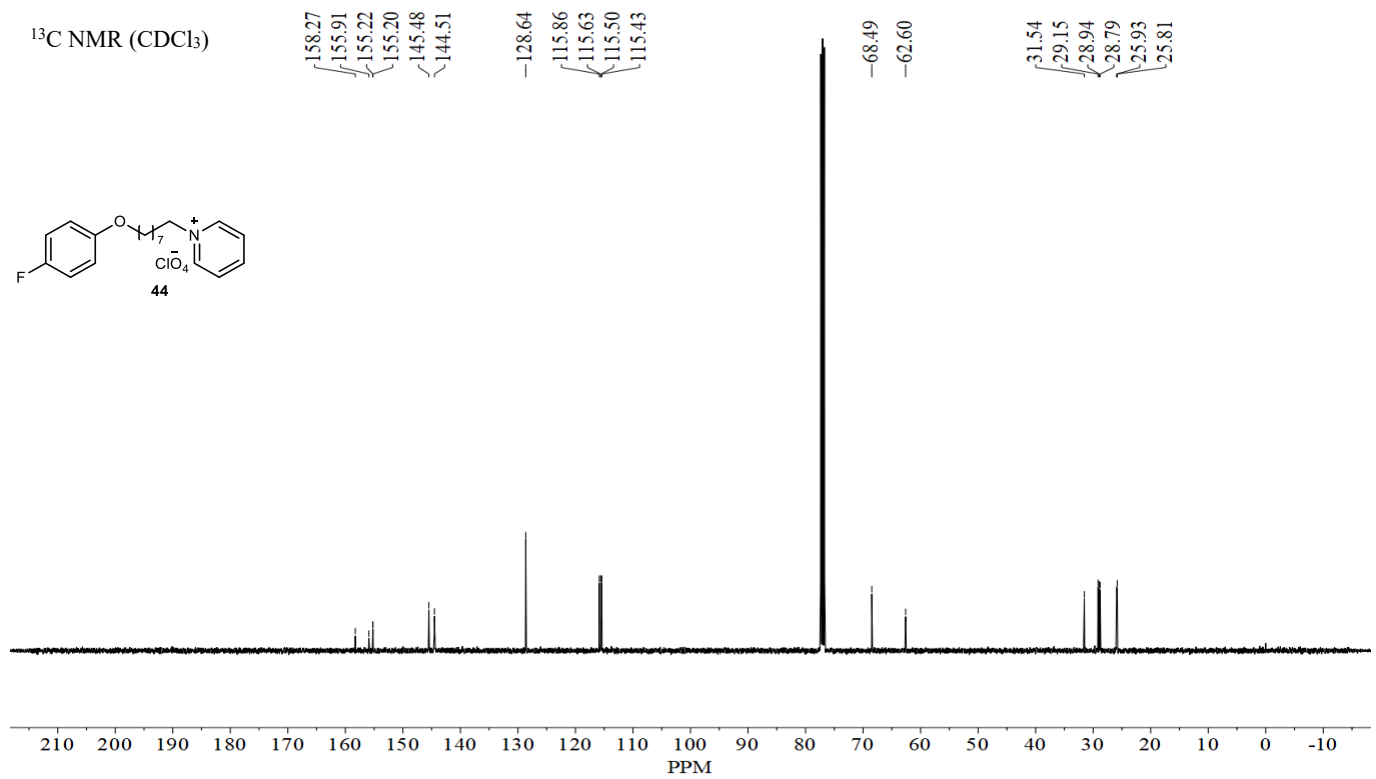

$^{19}\text{F}$  NMR ( $\text{CDCl}_3$ )

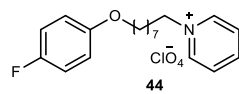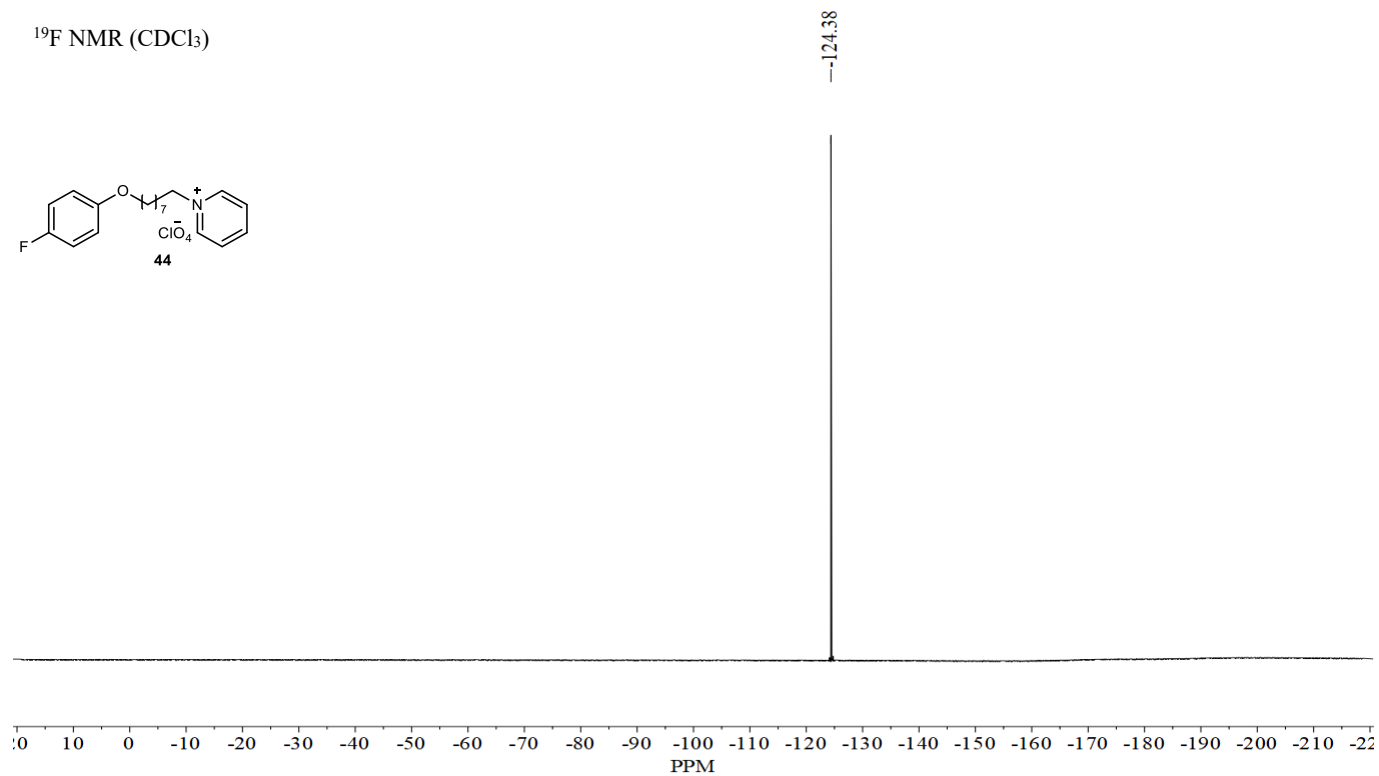

$^1\text{H}$  NMR ( $\text{CDCl}_3$ )

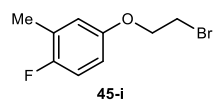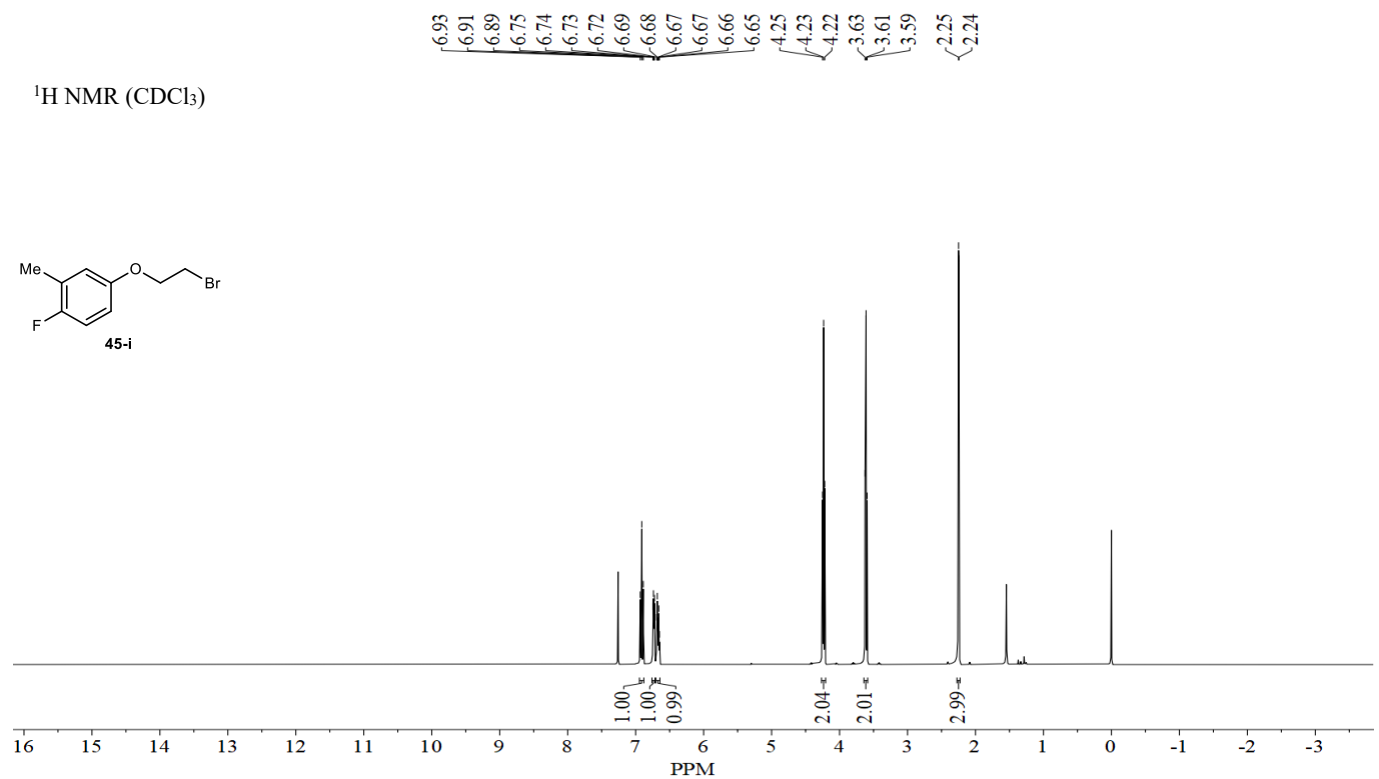

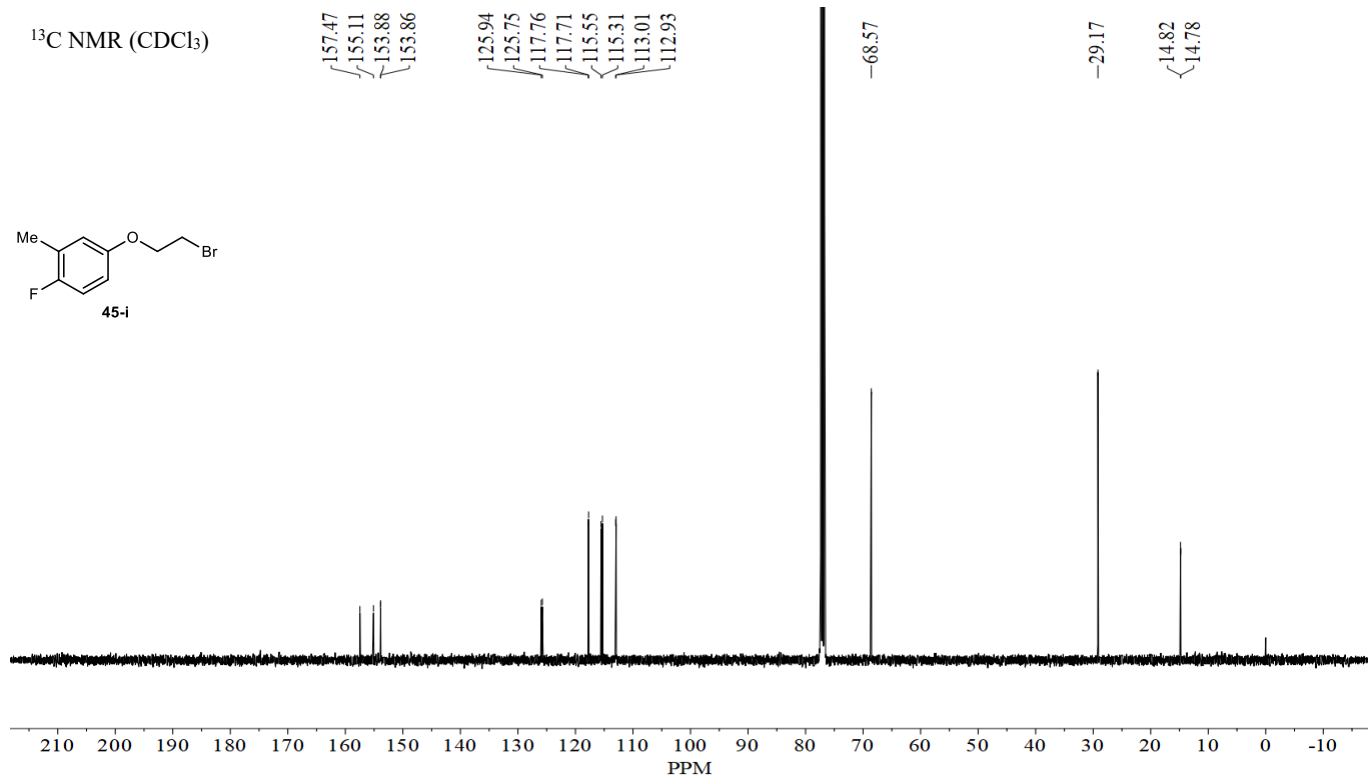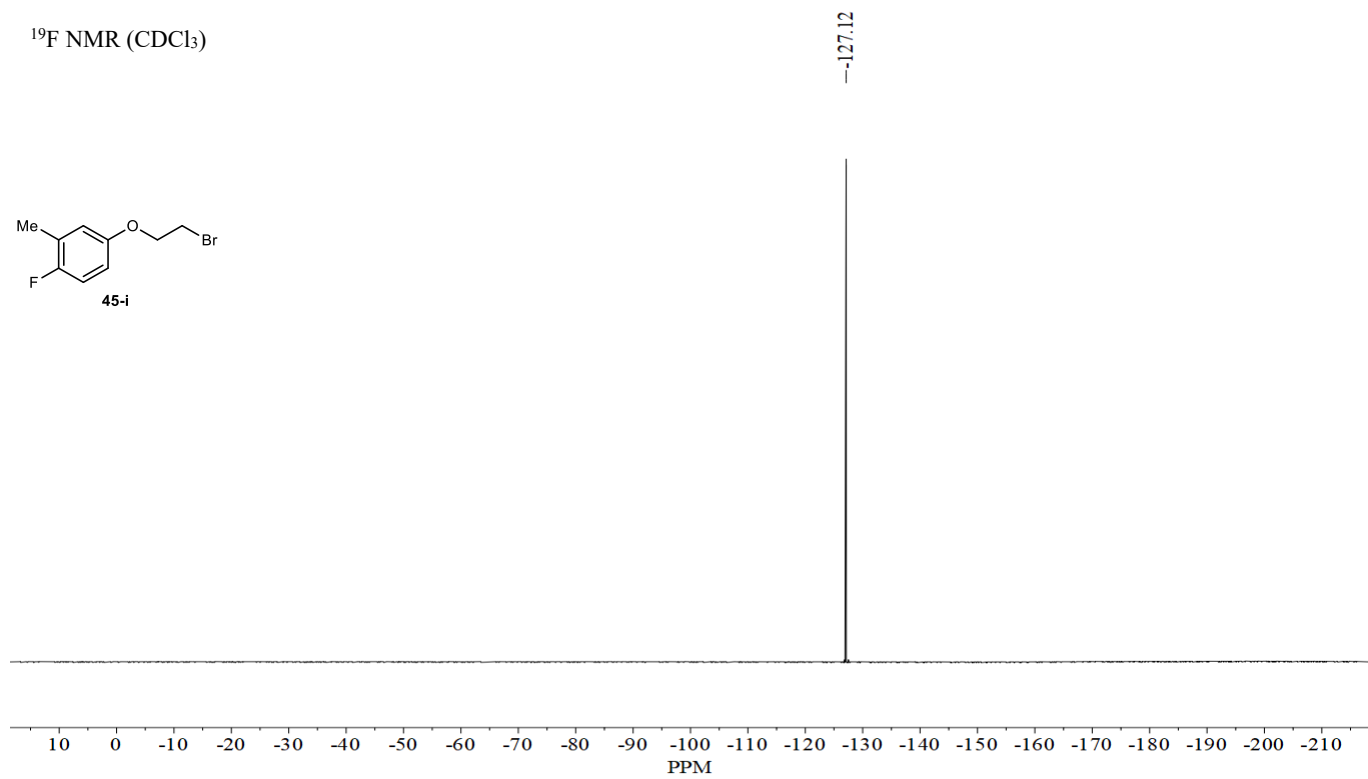

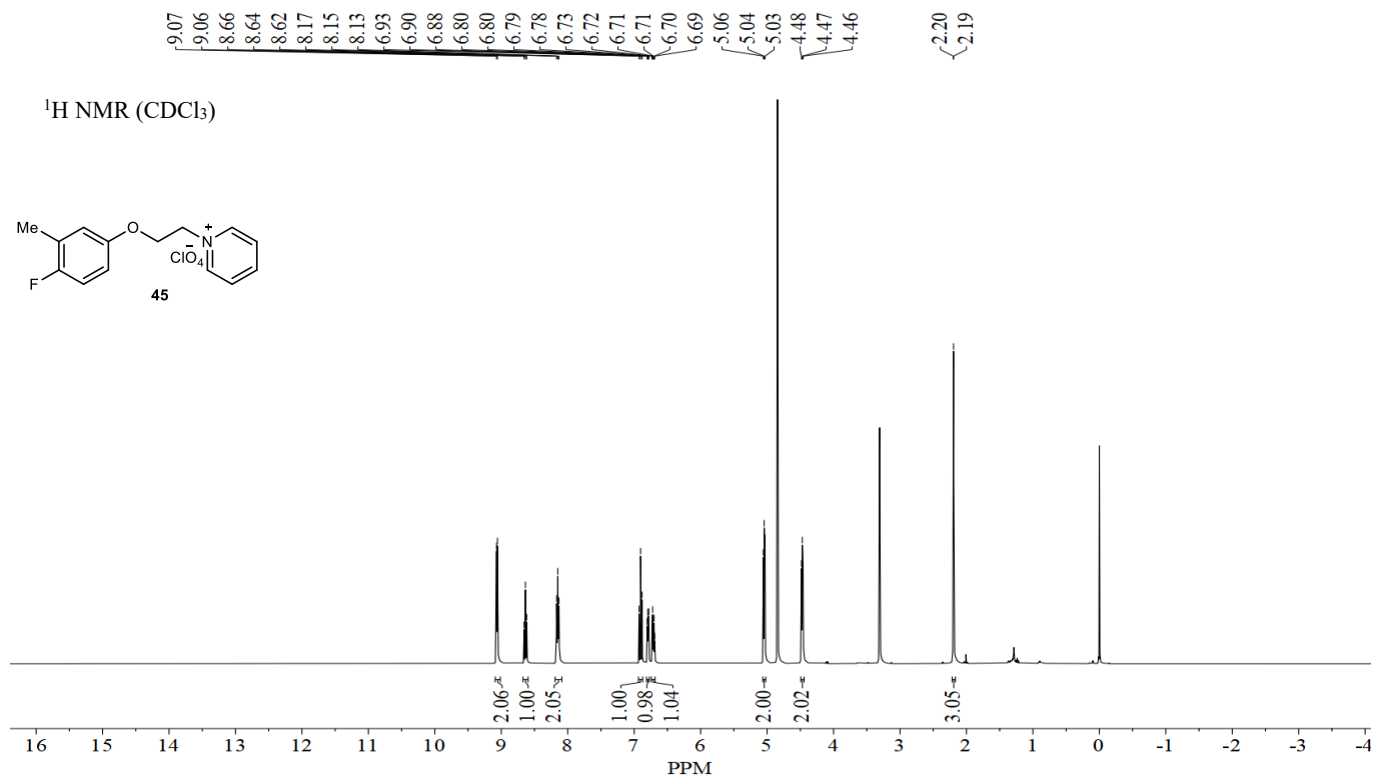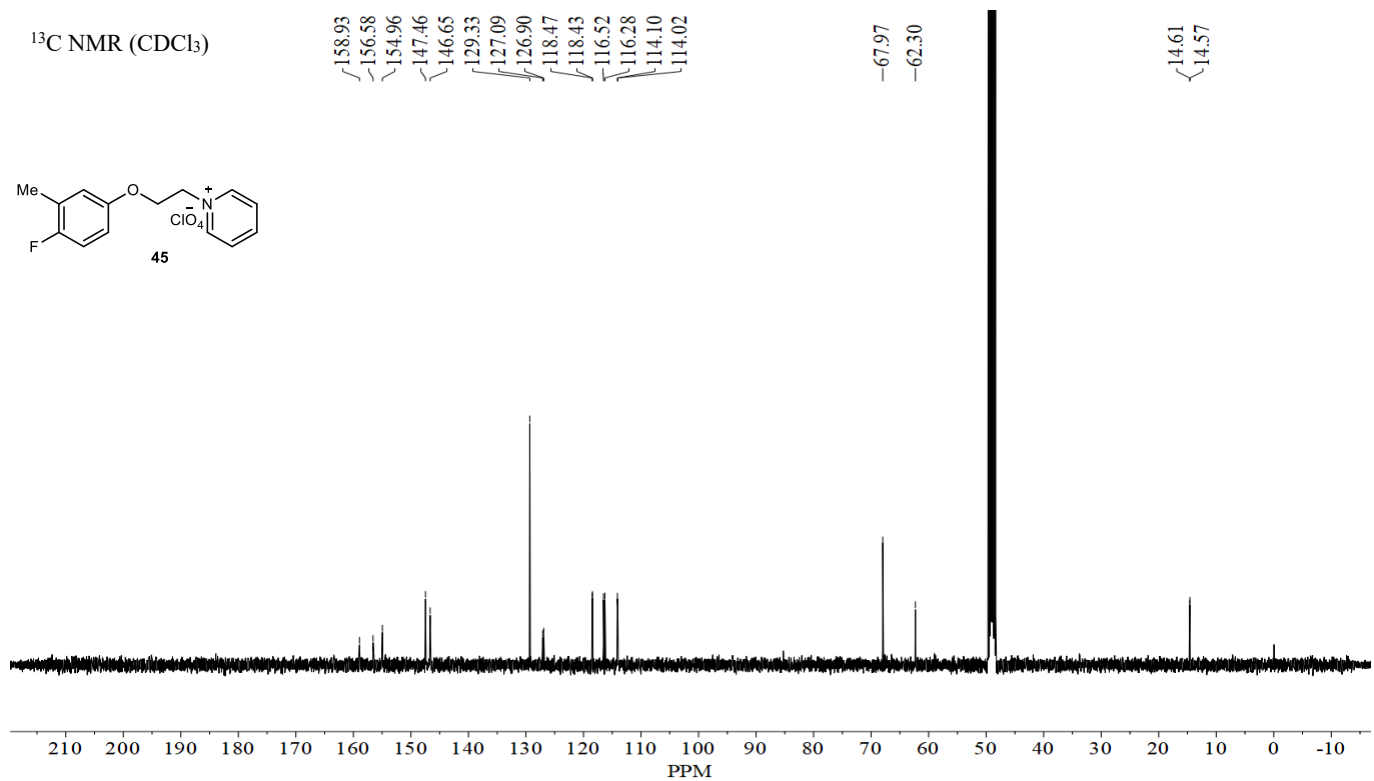

$^{19}\text{F}$  NMR ( $\text{CDCl}_3$ )

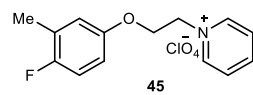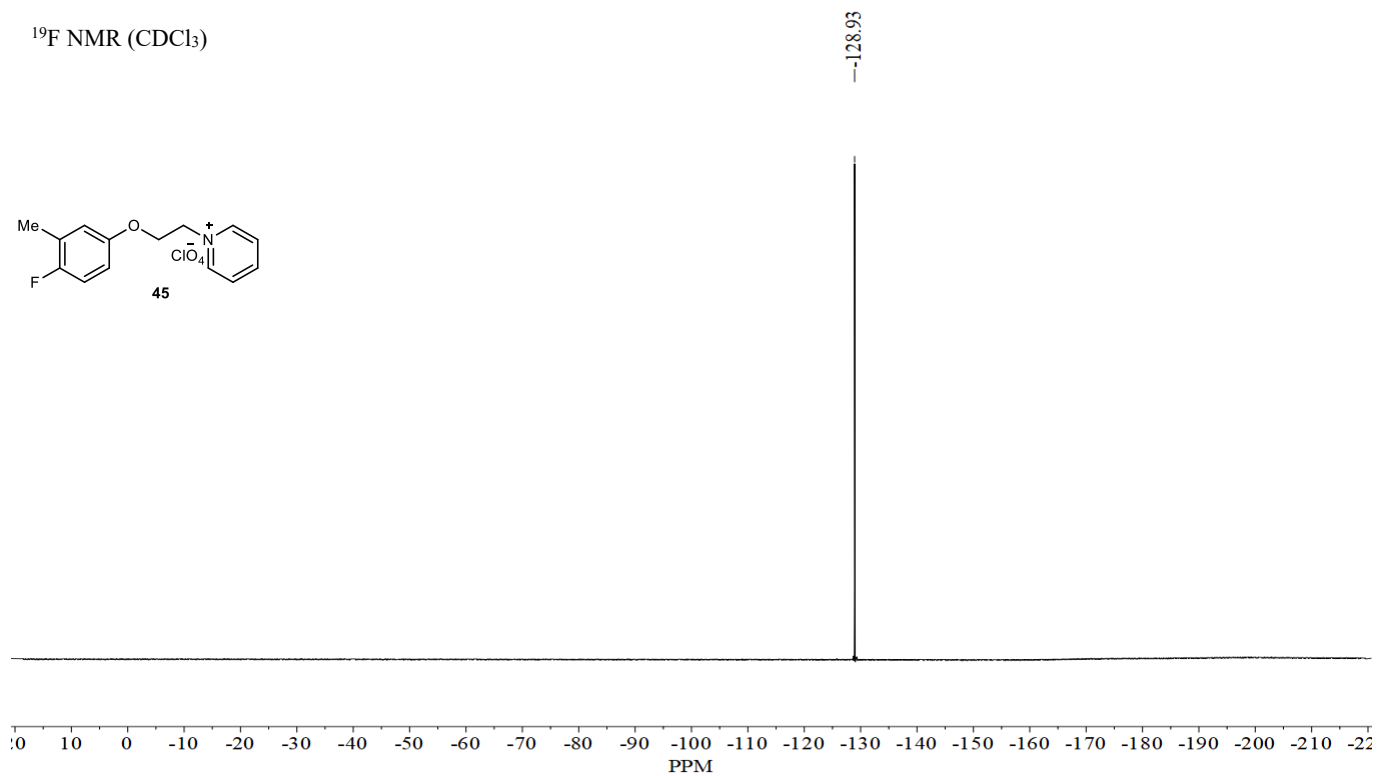

$^1\text{H}$  NMR ( $\text{CDCl}_3$ )

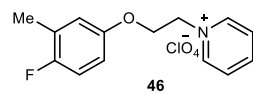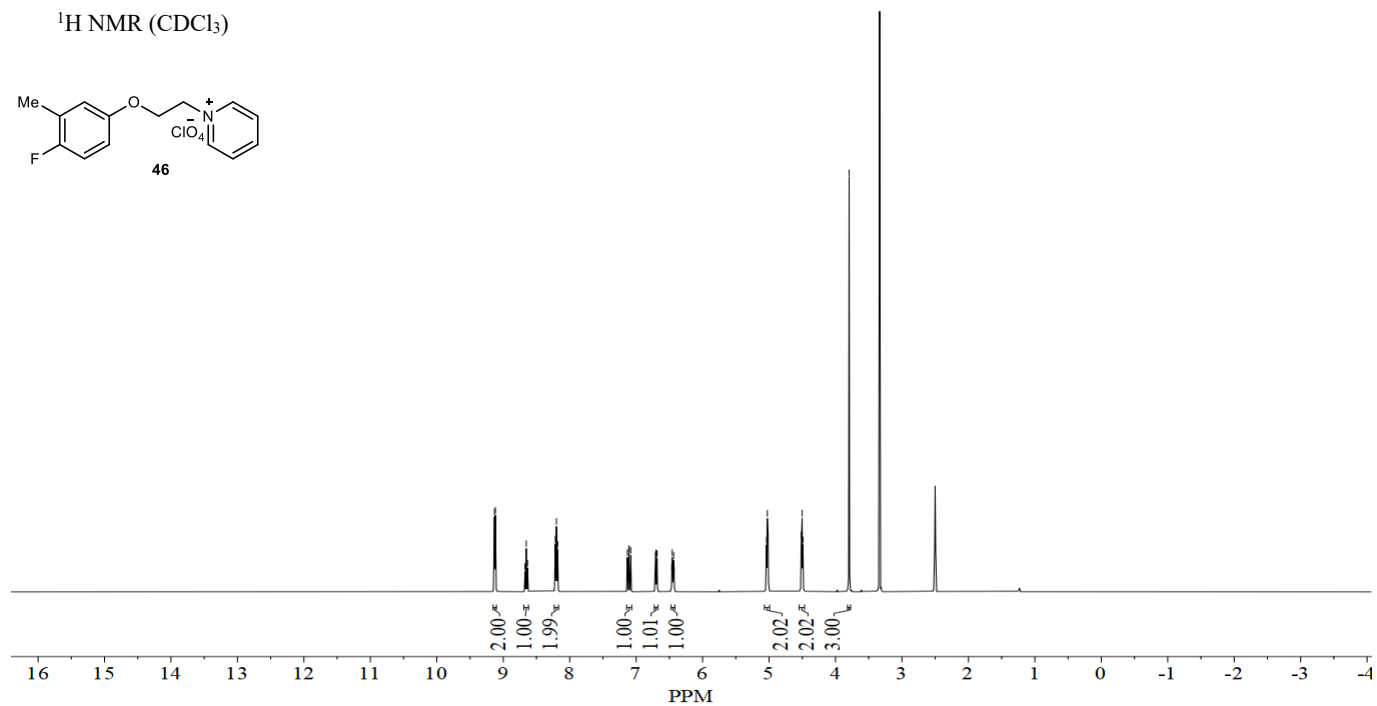

$^{13}\text{C}$  NMR ( $\text{CDCl}_3$ )

154.18  
154.16  
147.86  
147.74  
147.62  
146.10  
145.50  
145.43  
-127.94  
115.90  
115.71  
105.13  
105.06  
101.79  
101.78

~66.70  
~59.98  
~56.05

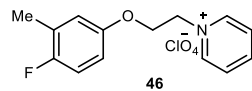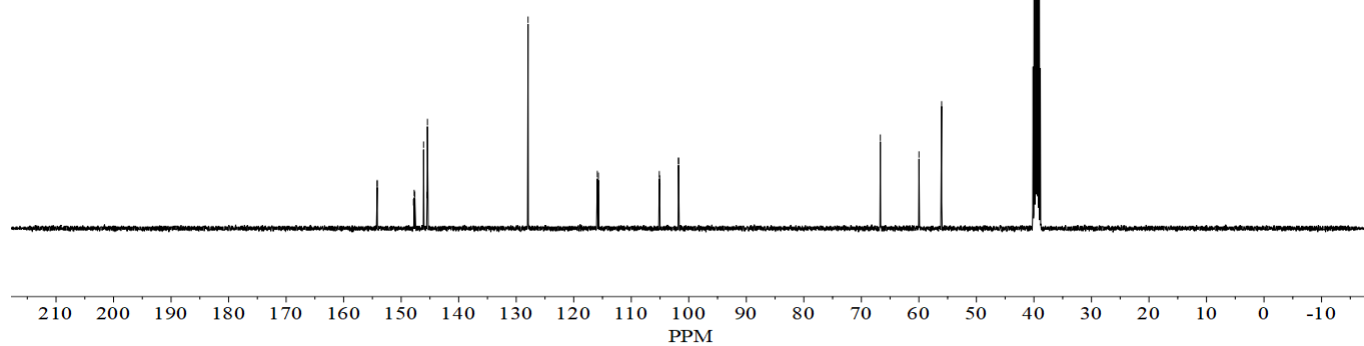

$^{19}\text{F}$  NMR ( $\text{CDCl}_3$ )

-144.34

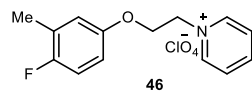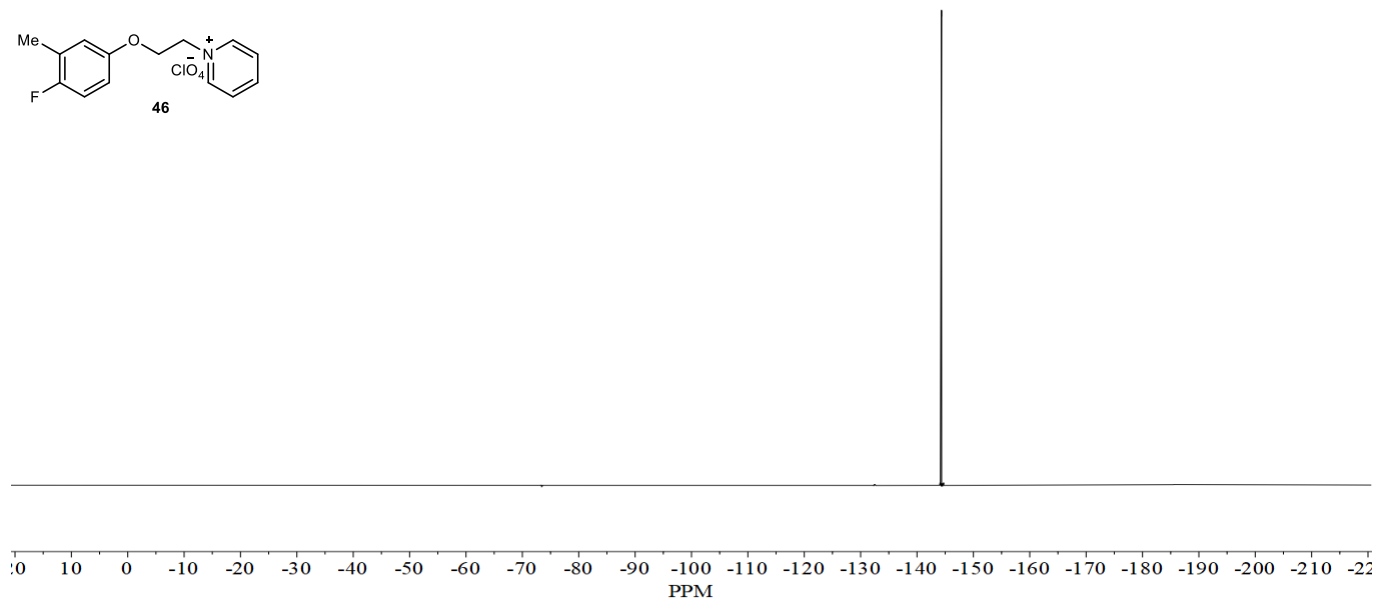

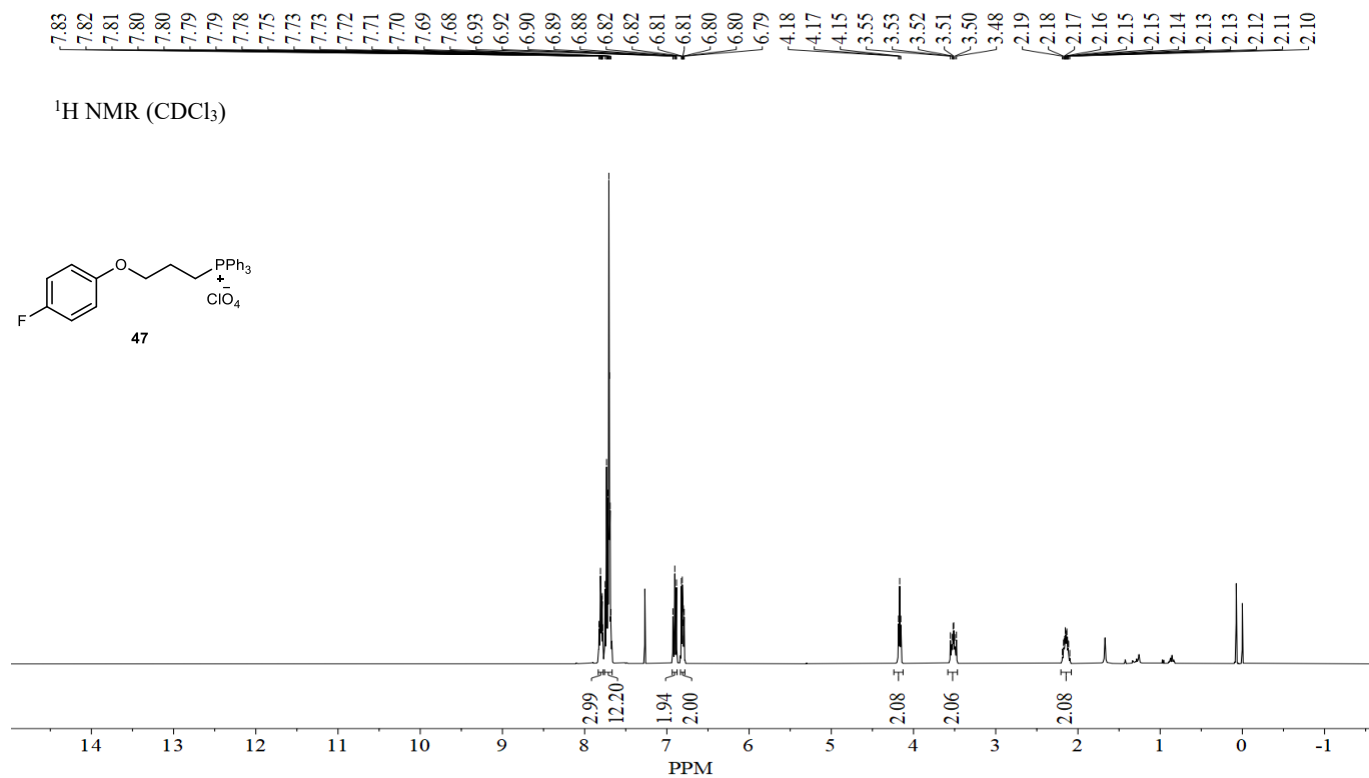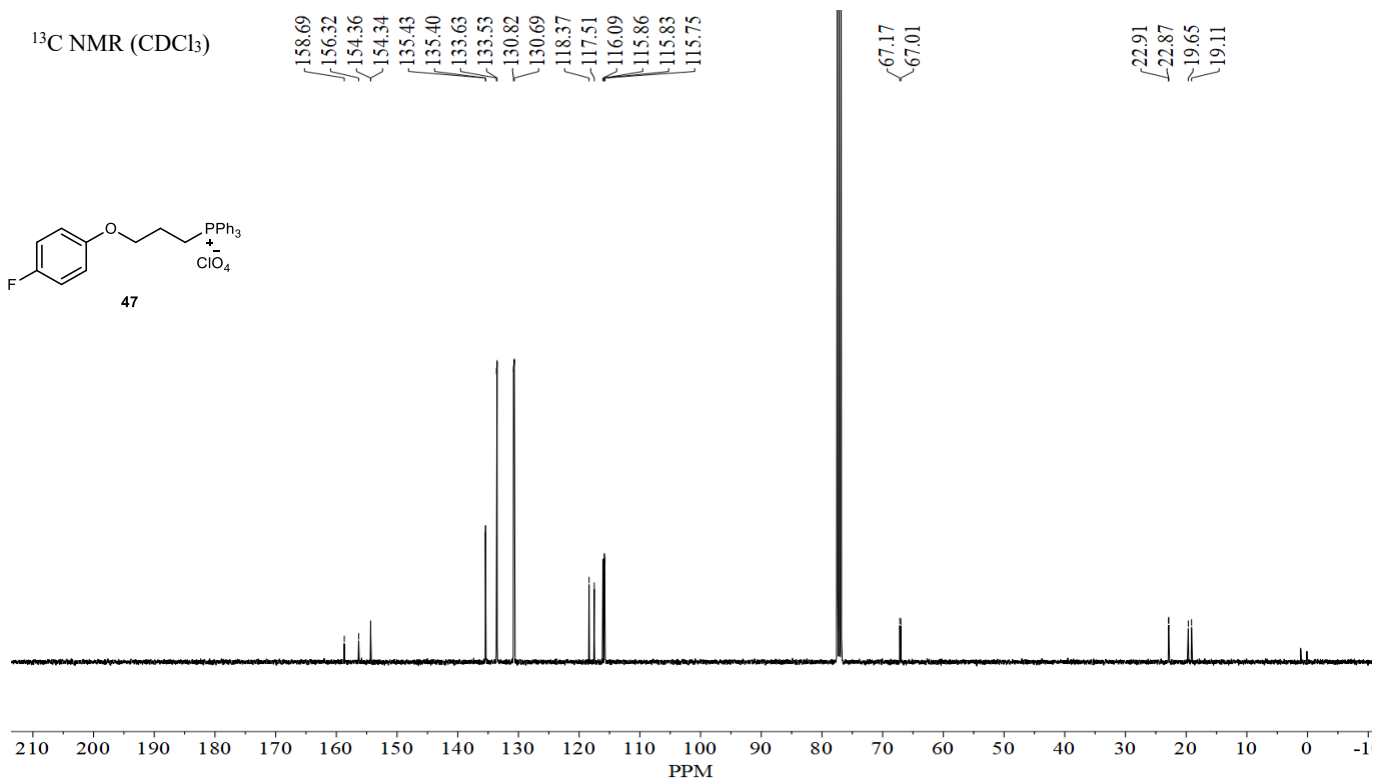

$^{19}\text{F}$  NMR ( $\text{CDCl}_3$ )

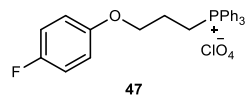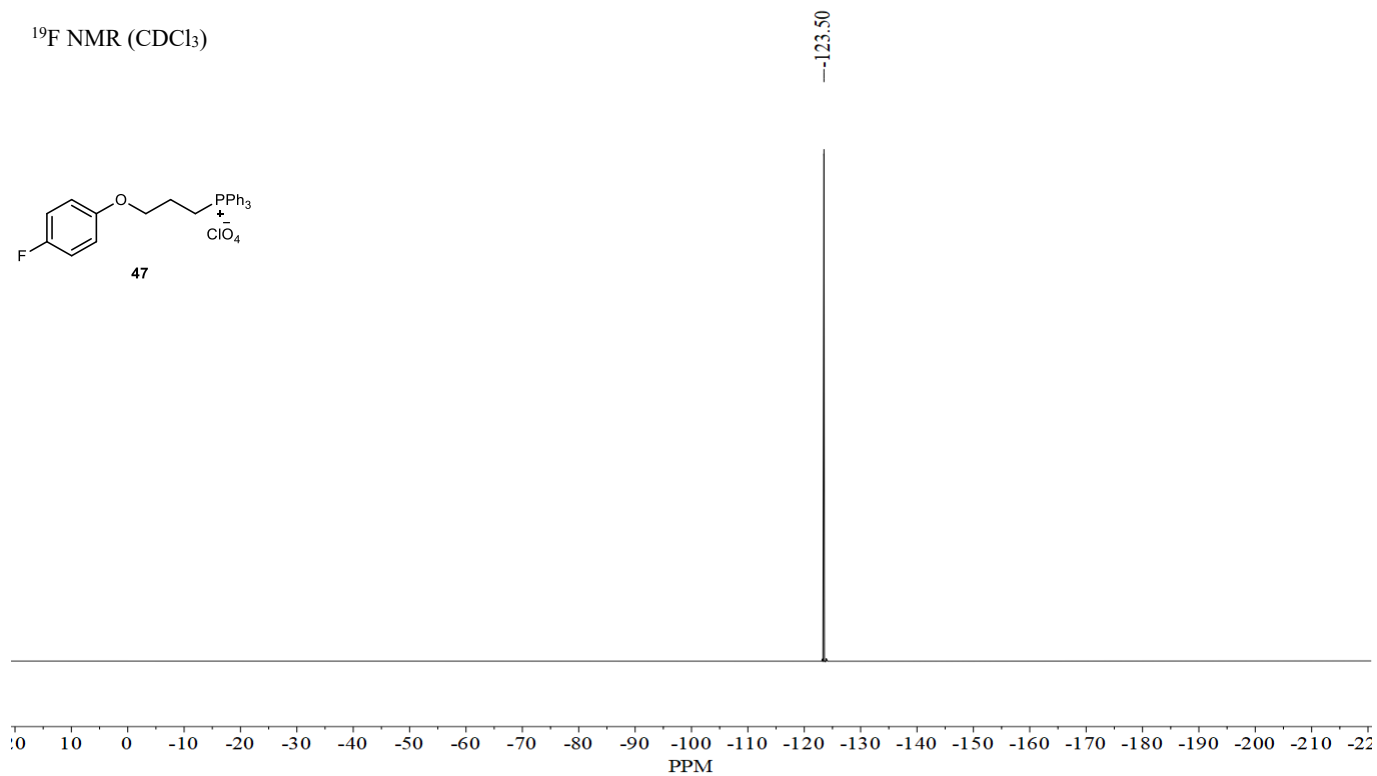

$^1\text{H}$  NMR ( $\text{CDCl}_3$ )

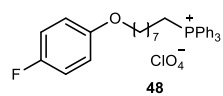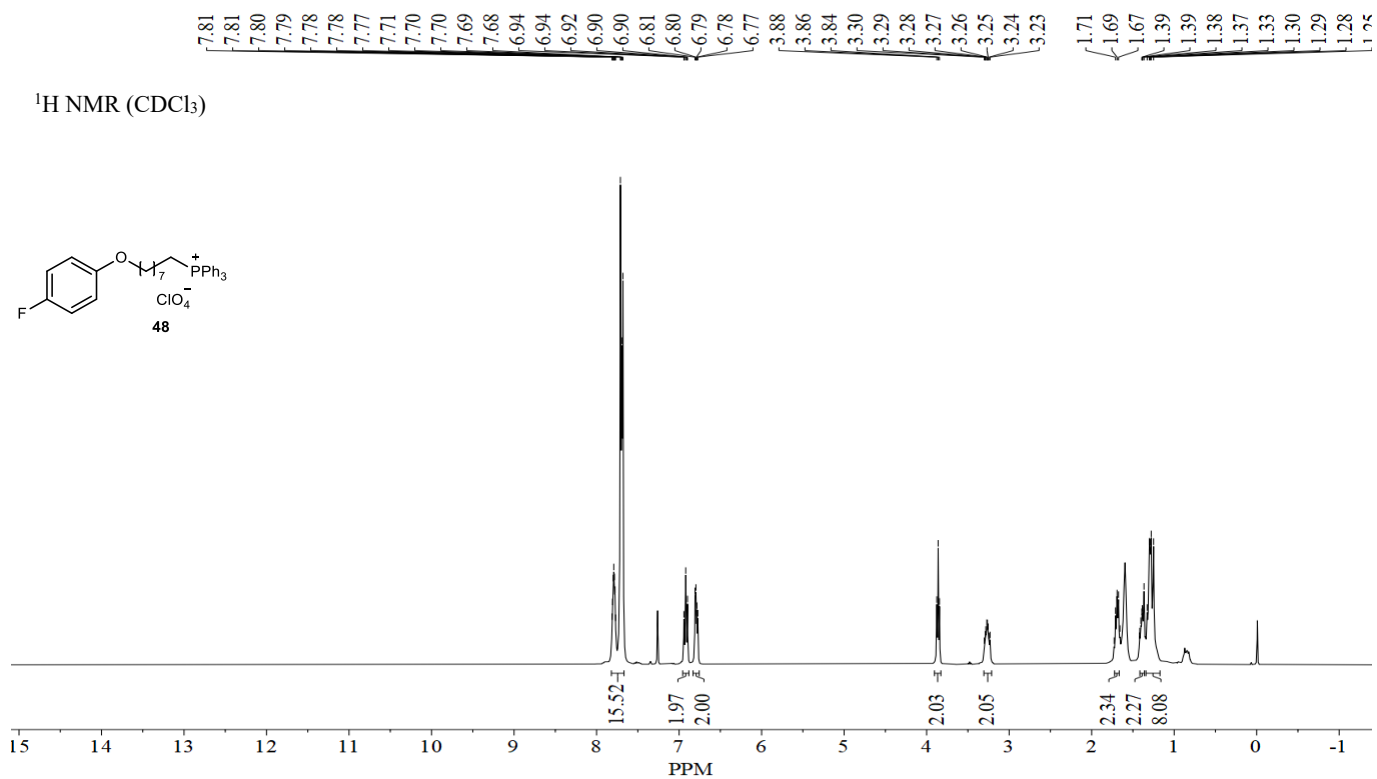





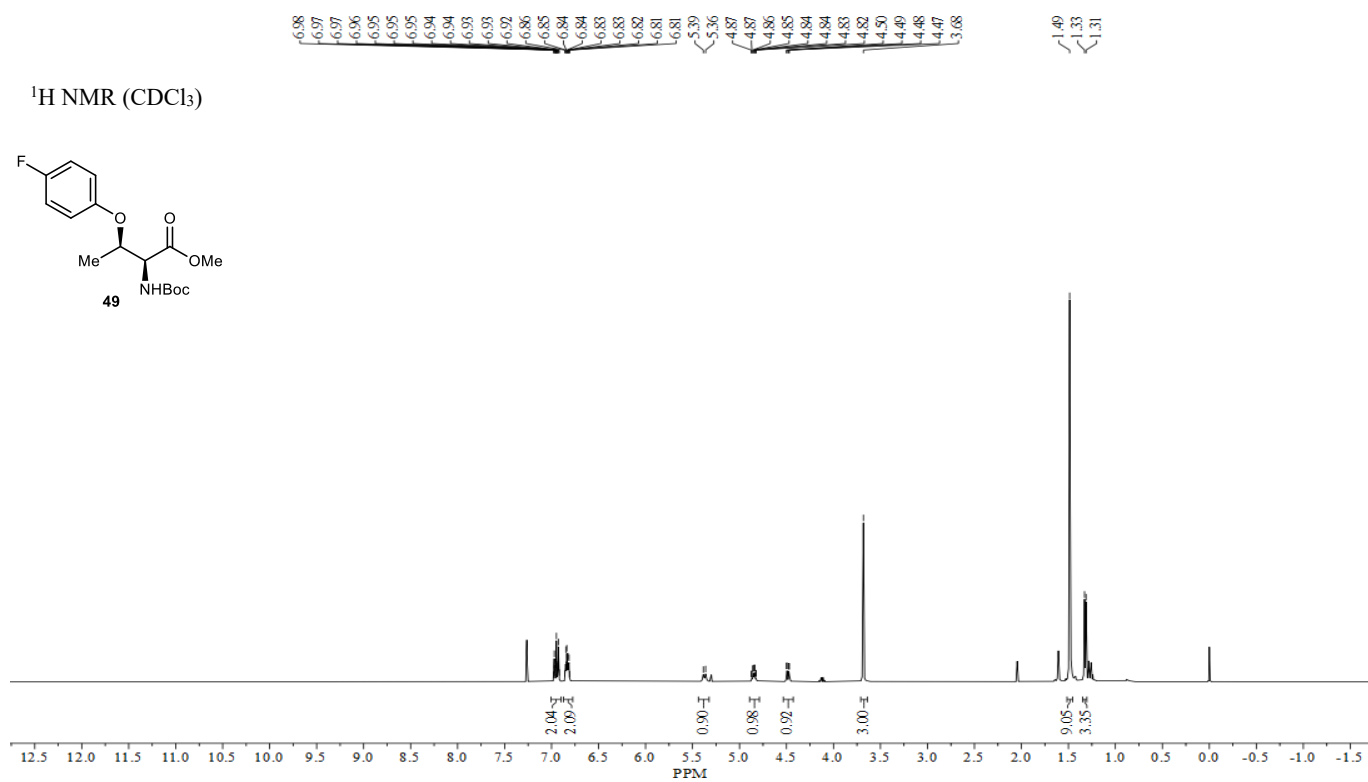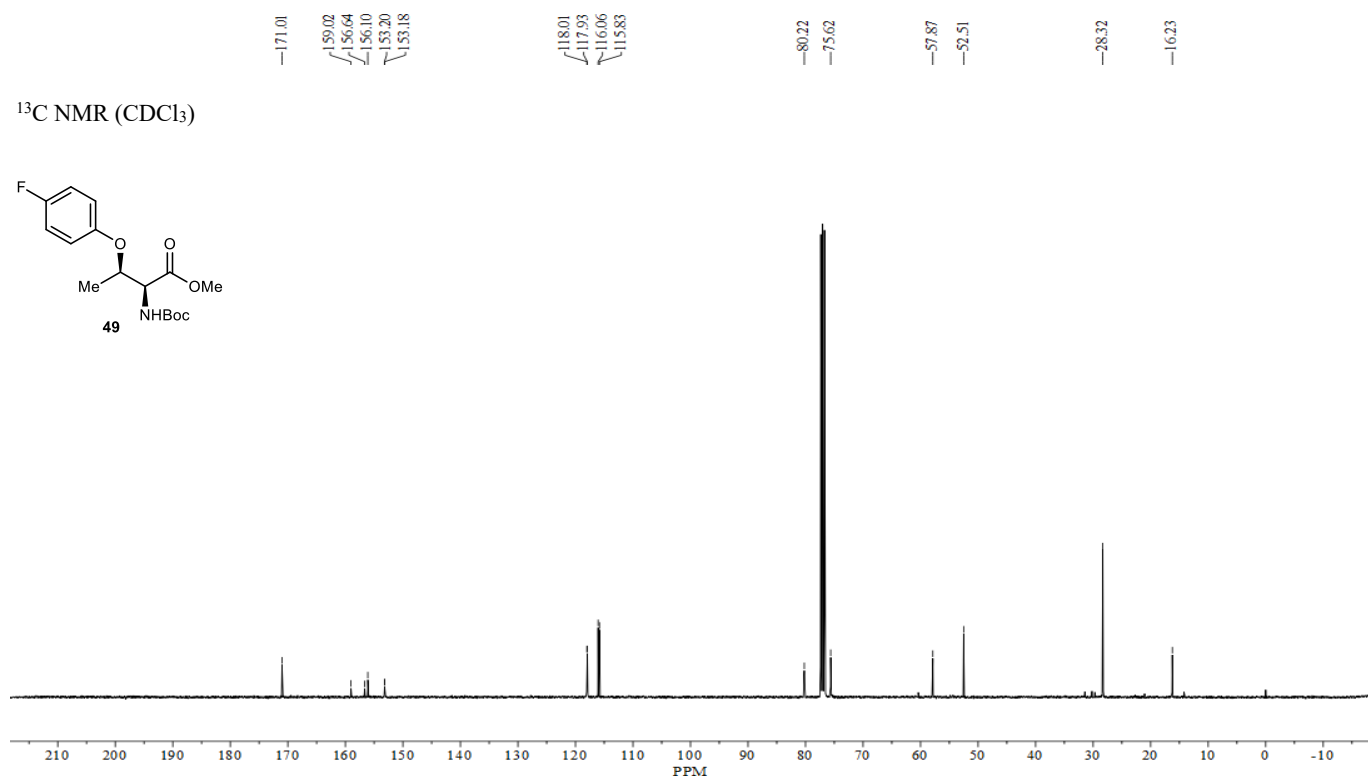

$^{19}\text{F}$  NMR ( $\text{CDCl}_3$ )

---122.22

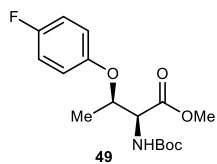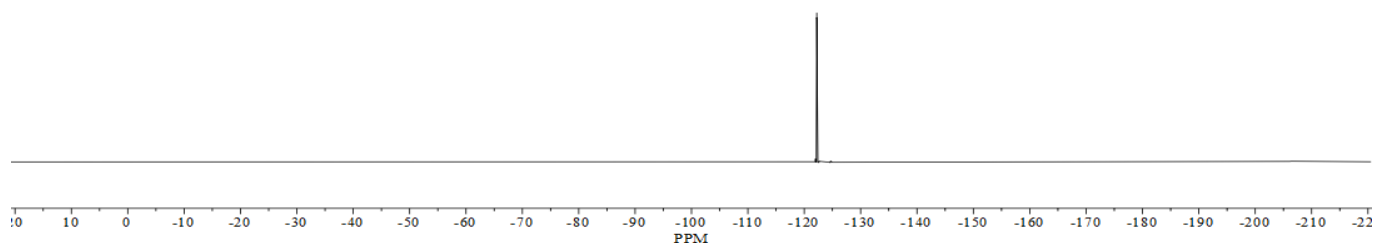

6.99  
6.98  
6.97  
6.96  
6.95  
6.94  
6.93  
6.92  
6.91  
6.90  
6.89  
6.88  
6.87  
6.86  
6.85  
6.84  
6.83  
6.82  
6.81  
6.80  
6.79  
6.78  
6.77  
6.76  
6.75  
6.74  
6.73  
6.72  
6.71  
6.70  
6.69  
6.68  
6.67  
6.66  
6.65  
6.64  
6.63  
6.62  
6.61  
6.60  
6.59  
6.58  
6.57  
6.56  
6.55  
6.54  
6.53  
6.52  
6.51  
6.50  
6.49  
6.48  
6.47  
6.46  
6.45  
6.44  
6.43  
6.42  
6.41  
6.40  
6.39  
6.38  
6.37  
6.36  
6.35  
6.34  
6.33  
6.32  
6.31  
6.30  
6.29  
6.28  
6.27  
6.26  
6.25  
6.24  
6.23  
6.22  
6.21  
6.20  
6.19  
6.18  
6.17  
6.16  
6.15  
6.14  
6.13  
6.12  
6.11  
6.10  
6.09  
6.08  
6.07  
6.06  
6.05  
6.04  
6.03  
6.02  
6.01  
6.00  
5.99  
5.98  
5.97  
5.96  
5.95  
5.94  
5.93  
5.92  
5.91  
5.90  
5.89  
5.88  
5.87  
5.86  
5.85  
5.84  
5.83  
5.82  
5.81  
5.80  
5.79  
5.78  
5.77  
5.76  
5.75  
5.74  
5.73  
5.72  
5.71  
5.70  
5.69  
5.68  
5.67  
5.66  
5.65  
5.64  
5.63  
5.62  
5.61  
5.60  
5.59  
5.58  
5.57  
5.56  
5.55  
5.54  
5.53  
5.52  
5.51  
5.50  
5.49  
5.48  
5.47  
5.46  
5.45  
5.44  
5.43  
5.42  
5.41  
5.40  
5.39  
5.38  
5.37  
5.36  
5.35  
5.34  
5.33  
5.32  
5.31  
5.30  
5.29  
5.28  
5.27  
5.26  
5.25  
5.24  
5.23  
5.22  
5.21  
5.20  
5.19  
5.18  
5.17  
5.16  
5.15  
5.14  
5.13  
5.12  
5.11  
5.10  
5.09  
5.08  
5.07  
5.06  
5.05  
5.04  
5.03  
5.02  
5.01  
5.00  
4.99  
4.98  
4.97  
4.96  
4.95  
4.94  
4.93  
4.92  
4.91  
4.90  
4.89  
4.88  
4.87  
4.86  
4.85  
4.84  
4.83  
4.82  
4.81  
4.80  
4.79  
4.78  
4.77  
4.76  
4.75  
4.74  
4.73  
4.72  
4.71  
4.70  
4.69  
4.68  
4.67  
4.66  
4.65  
4.64  
4.63  
4.62  
4.61  
4.60  
4.59  
4.58  
4.57  
4.56  
4.55  
4.54  
4.53  
4.52  
4.51  
4.50  
4.49  
4.48  
4.47  
4.46  
4.45  
4.44  
4.43  
4.42  
4.41  
4.40  
4.39  
4.38  
4.37  
4.36  
4.35  
4.34  
4.33  
4.32  
4.31  
4.30  
4.29  
4.28  
4.27  
4.26  
4.25  
4.24  
4.23  
4.22  
4.21  
4.20  
4.19  
4.18  
4.17  
4.16  
4.15  
4.14  
4.13  
4.12  
4.11  
4.10  
4.09  
4.08  
4.07  
4.06  
4.05  
4.04  
4.03  
4.02  
4.01  
4.00  
3.99  
3.98  
3.97  
3.96  
3.95  
3.94  
3.93  
3.92  
3.91  
3.90  
3.89  
3.88  
3.87  
3.86  
3.85  
3.84  
3.83  
3.82  
3.81  
3.80  
3.79  
3.78  
3.77  
3.76  
3.75  
3.74  
3.73  
3.72  
3.71  
3.70  
3.69  
3.68  
3.67  
3.66  
3.65  
3.64  
3.63  
3.62  
3.61  
3.60  
3.59  
3.58  
3.57  
3.56  
3.55  
3.54  
3.53  
3.52  
3.51  
3.50  
3.49  
3.48  
3.47  
3.46  
3.45  
3.44  
3.43  
3.42  
3.41  
3.40  
3.39  
3.38  
3.37  
3.36  
3.35  
3.34  
3.33  
3.32  
3.31  
3.30  
3.29  
3.28  
3.27  
3.26  
3.25  
3.24  
3.23  
3.22  
3.21  
3.20  
3.19  
3.18  
3.17  
3.16  
3.15  
3.14  
3.13  
3.12  
3.11  
3.10  
3.09  
3.08  
3.07  
3.06  
3.05  
3.04  
3.03  
3.02  
3.01  
3.00  
2.99  
2.98  
2.97  
2.96  
2.95  
2.94  
2.93  
2.92  
2.91  
2.90  
2.89  
2.88  
2.87  
2.86  
2.85  
2.84  
2.83  
2.82  
2.81  
2.80  
2.79  
2.78  
2.77  
2.76  
2.75  
2.74  
2.73  
2.72  
2.71  
2.70  
2.69  
2.68  
2.67  
2.66  
2.65  
2.64  
2.63  
2.62  
2.61  
2.60  
2.59  
2.58  
2.57  
2.56  
2.55  
2.54  
2.53  
2.52  
2.51  
2.50  
2.49  
2.48  
2.47  
2.46  
2.45  
2.44  
2.43  
2.42  
2.41  
2.40  
2.39  
2.38  
2.37  
2.36  
2.35  
2.34  
2.33  
2.32  
2.31  
2.30  
2.29  
2.28  
2.27  
2.26  
2.25  
2.24  
2.23  
2.22  
2.21  
2.20  
2.19  
2.18  
2.17  
2.16  
2.15  
2.14  
2.13  
2.12  
2.11  
2.10  
2.09  
2.08  
2.07  
2.06  
2.05  
2.04  
2.03  
2.02  
2.01  
2.00  
1.99  
1.98  
1.97  
1.96  
1.95  
1.94  
1.93  
1.92  
1.91  
1.90  
1.89  
1.88  
1.87  
1.86  
1.85  
1.84  
1.83  
1.82  
1.81  
1.80  
1.79  
1.78  
1.77  
1.76  
1.75  
1.74  
1.73  
1.72  
1.71  
1.70  
1.69  
1.68  
1.67  
1.66  
1.65  
1.64  
1.63  
1.62  
1.61  
1.60  
1.59  
1.58  
1.57  
1.56  
1.55  
1.54  
1.53  
1.52  
1.51  
1.50  
1.49  
1.48  
1.47  
1.46  
1.45  
1.44  
1.43  
1.42  
1.41  
1.40  
1.39  
1.38  
1.37  
1.36  
1.35  
1.34  
1.33  
1.32  
1.31  
1.30  
1.29  
1.28  
1.27  
1.26  
1.25  
1.24  
1.23  
1.22  
1.21  
1.20  
1.19  
1.18  
1.17  
1.16  
1.15  
1.14  
1.13  
1.12  
1.11  
1.10  
1.09  
1.08  
1.07  
1.06  
1.05  
1.04  
1.03  
1.02  
1.01  
1.00  
0.99  
0.98  
0.97  
0.96  
0.95  
0.94  
0.93  
0.92  
0.91  
0.90  
0.89  
0.88  
0.87  
0.86  
0.85  
0.84  
0.83  
0.82  
0.81  
0.80  
0.79  
0.78  
0.77  
0.76  
0.75  
0.74  
0.73  
0.72  
0.71  
0.70  
0.69  
0.68  
0.67  
0.66  
0.65  
0.64  
0.63  
0.62  
0.61  
0.60  
0.59  
0.58  
0.57  
0.56  
0.55  
0.54  
0.53  
0.52  
0.51  
0.50  
0.49  
0.48  
0.47  
0.46  
0.45  
0.44  
0.43  
0.42  
0.41  
0.40  
0.39  
0.38  
0.37  
0.36  
0.35  
0.34  
0.33  
0.32  
0.31  
0.30  
0.29  
0.28  
0.27  
0.26  
0.25  
0.24  
0.23  
0.22  
0.21  
0.20  
0.19  
0.18  
0.17  
0.16  
0.15  
0.14  
0.13  
0.12  
0.11  
0.10  
0.09  
0.08  
0.07  
0.06  
0.05  
0.04  
0.03  
0.02  
0.01  
0.00  
-0.01  
-0.02  
-0.03  
-0.04  
-0.05  
-0.06  
-0.07  
-0.08  
-0.09  
-0.10  
-0.11  
-0.12  
-0.13  
-0.14  
-0.15  
-0.16  
-0.17  
-0.18  
-0.19  
-0.20  
-0.21  
-0.22

$^1\text{H}$  NMR ( $\text{CDCl}_3$ )

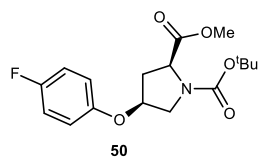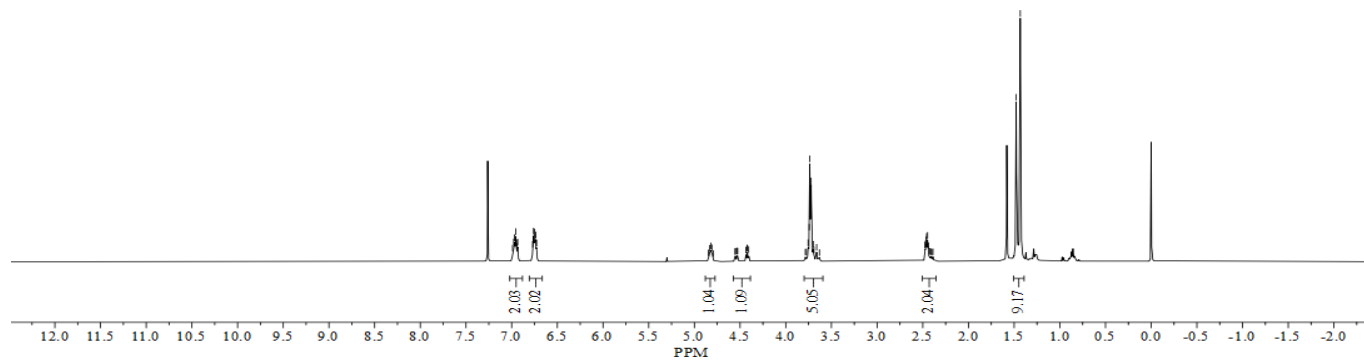

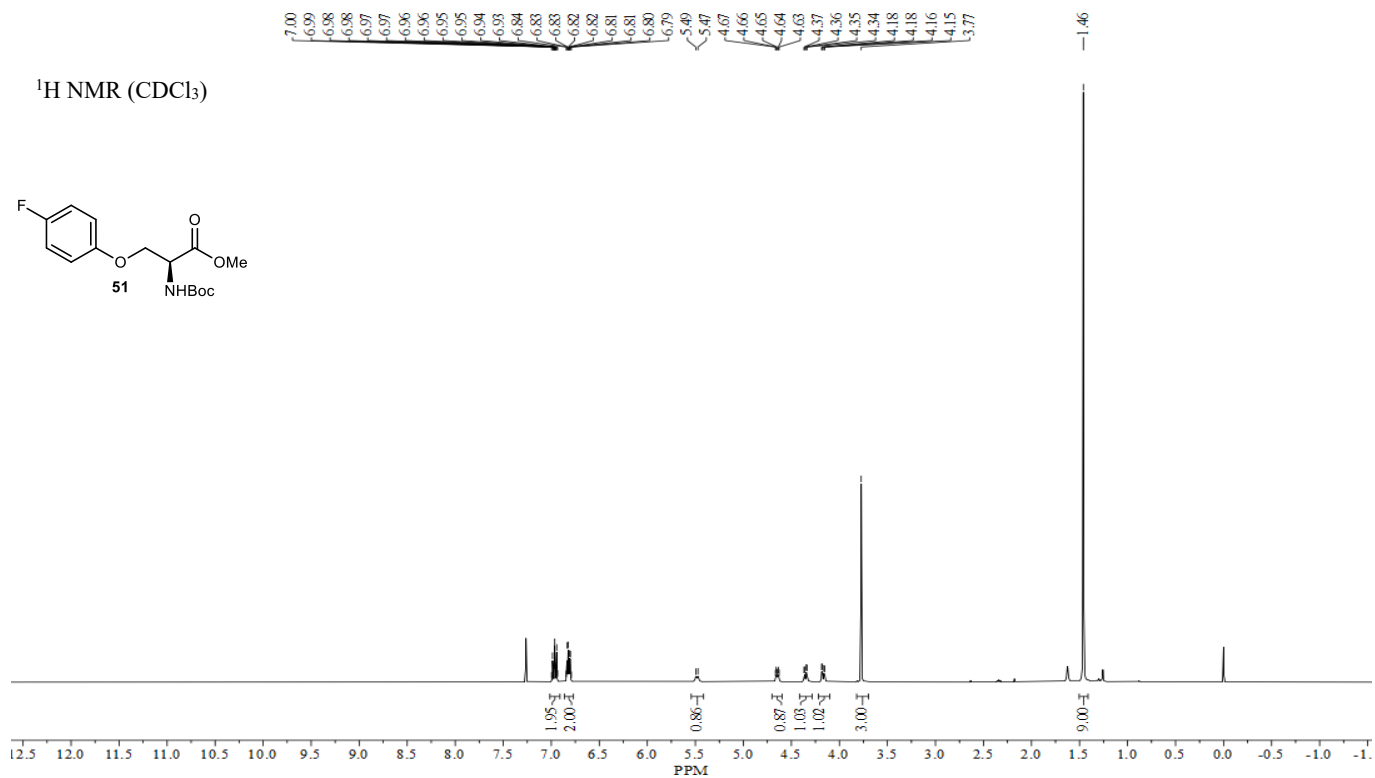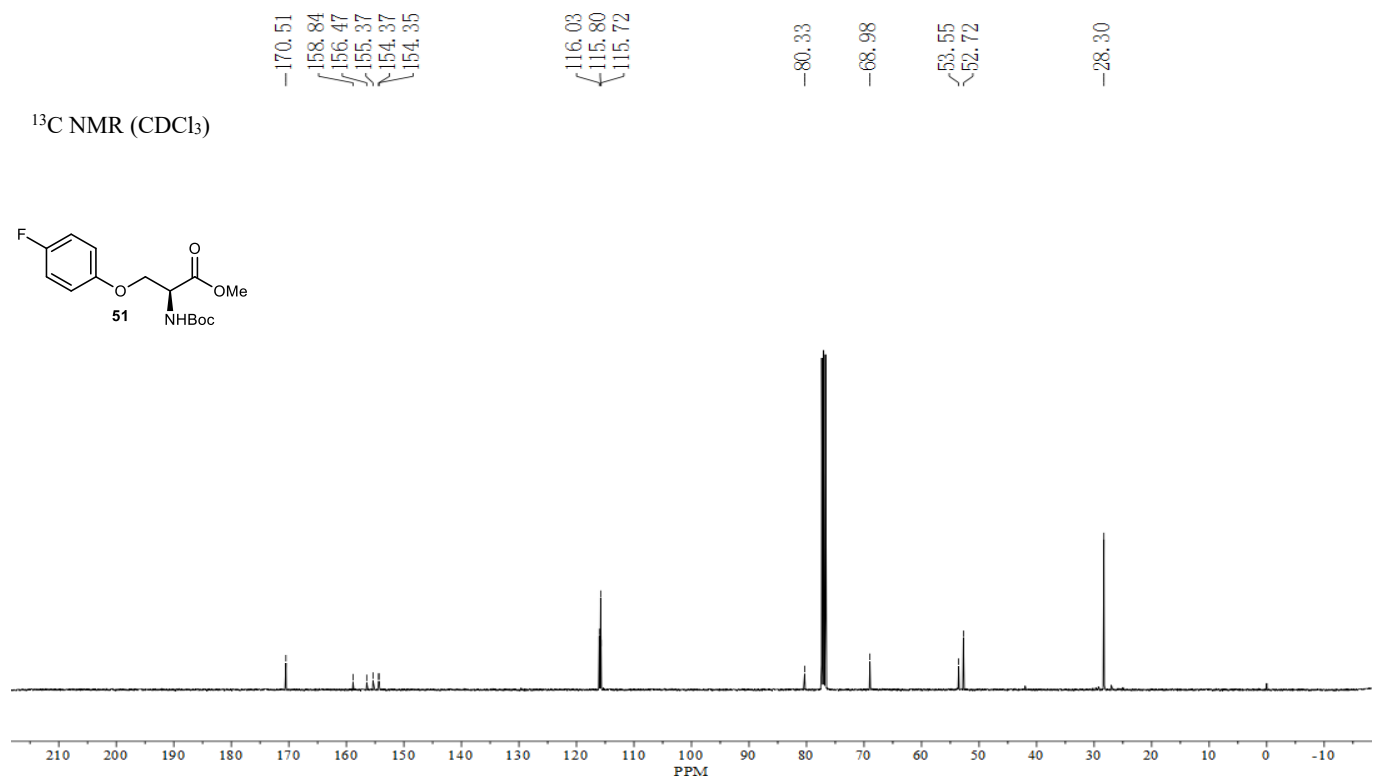

$^{19}\text{F}$  NMR ( $\text{CDCl}_3$ )

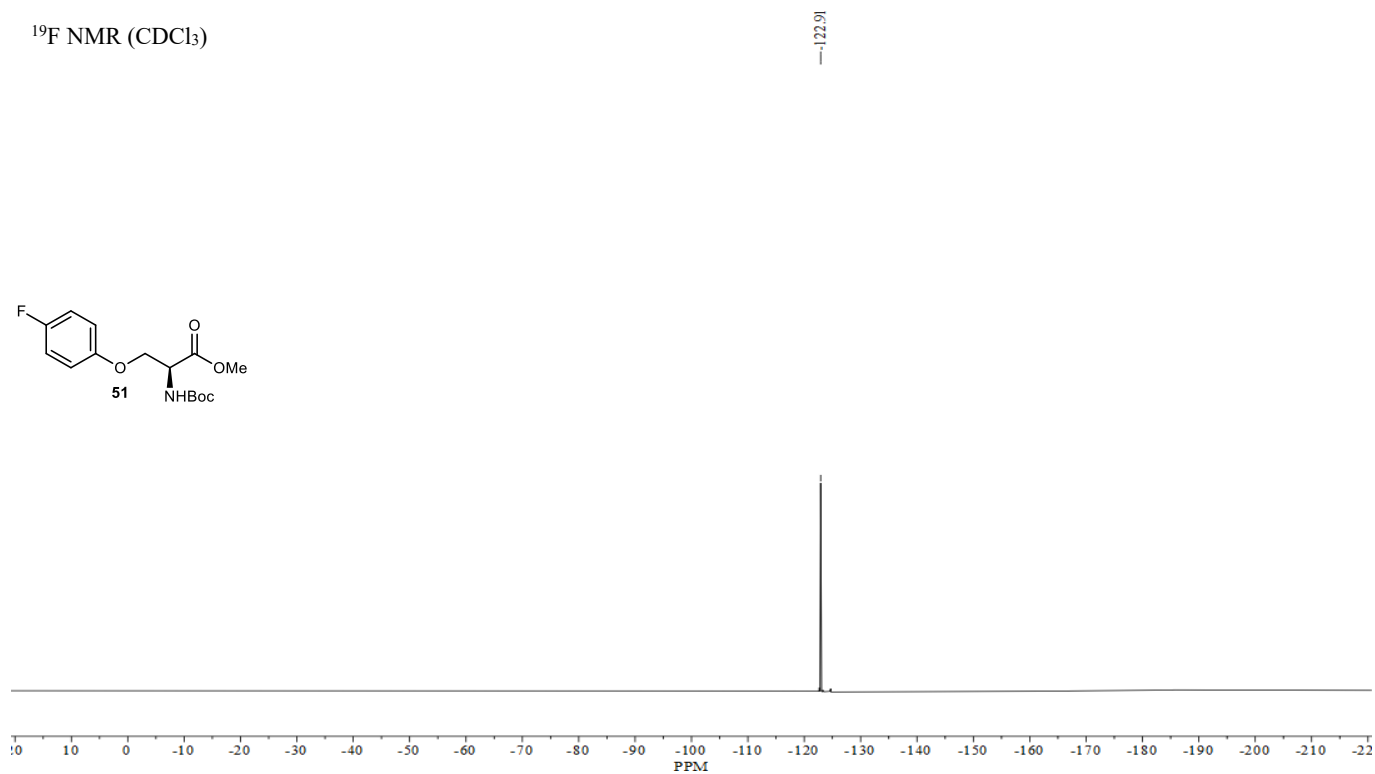

$^1\text{H}$  NMR ( $\text{CDCl}_3$ )

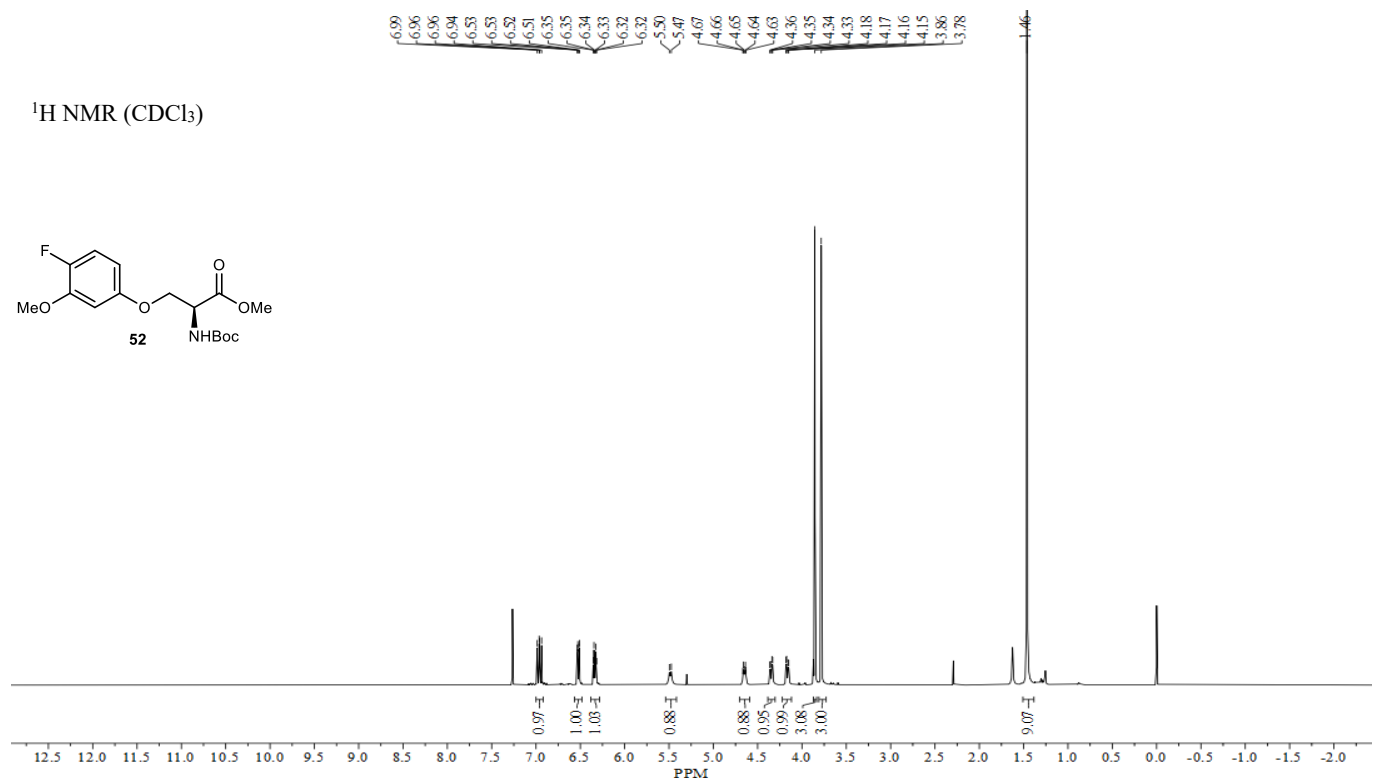

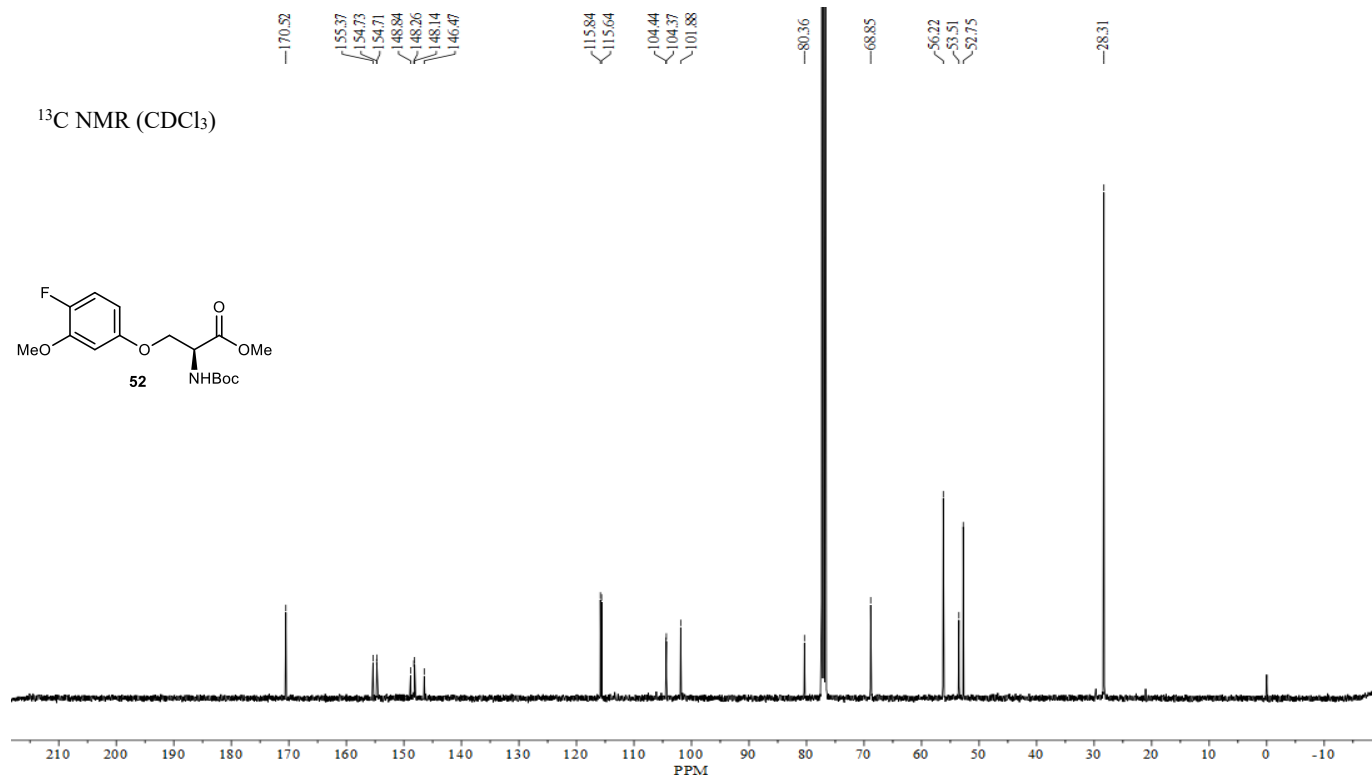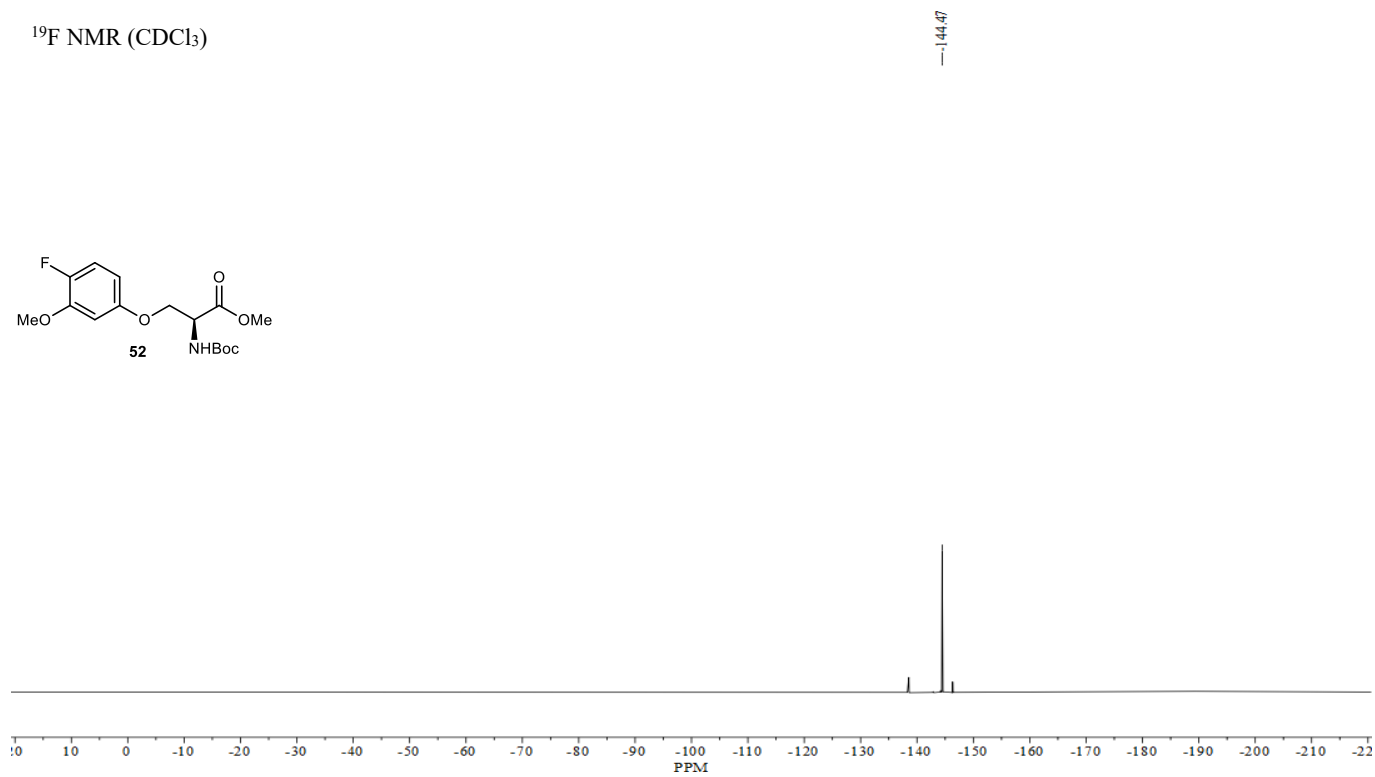

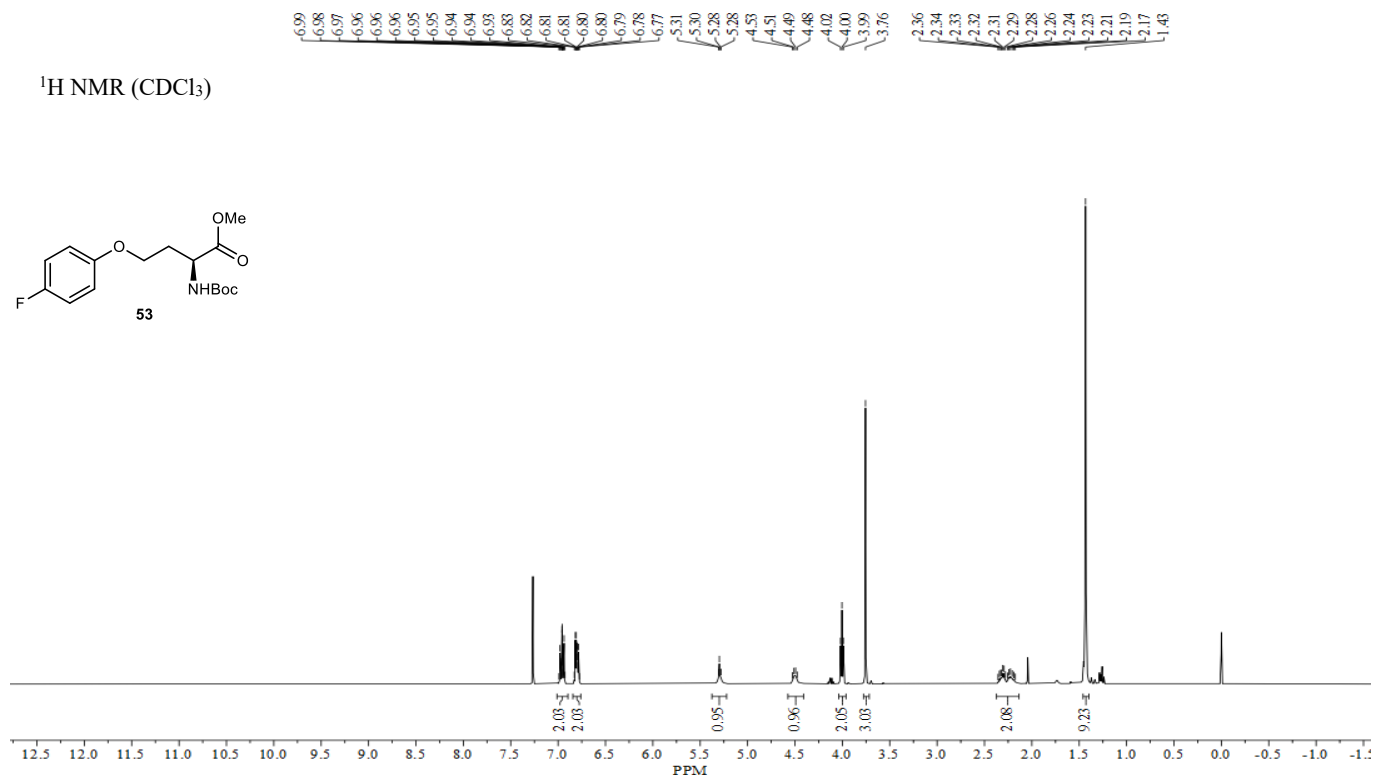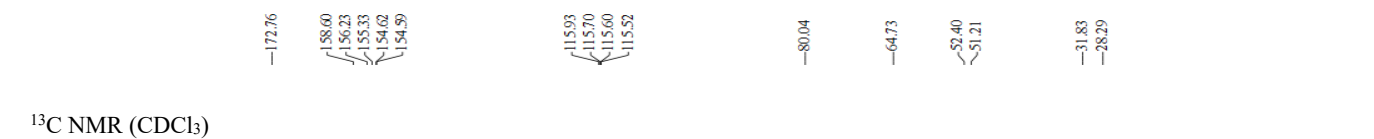

$^{19}\text{F}$  NMR ( $\text{CDCl}_3$ )

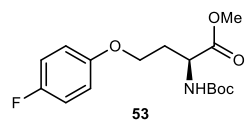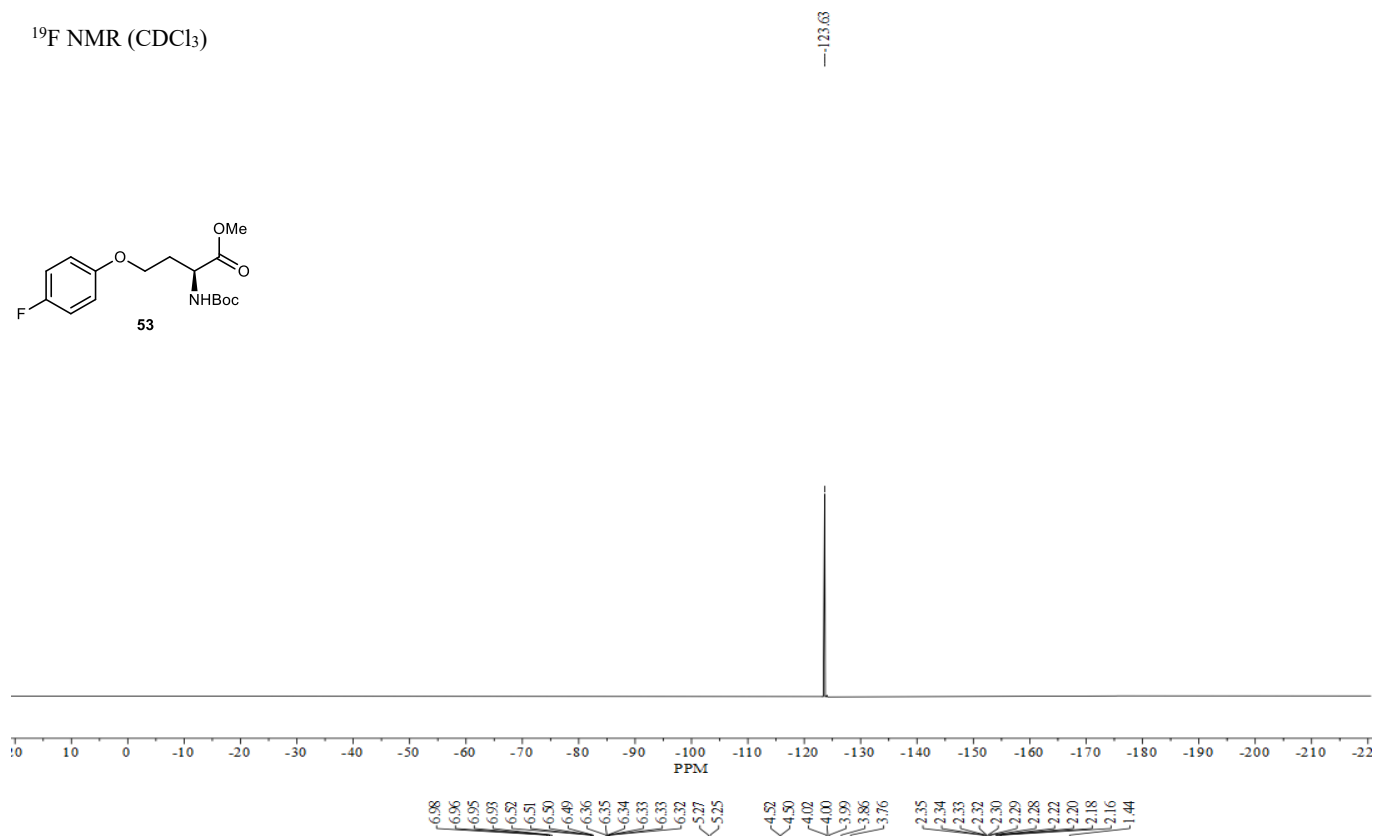

$^1\text{H}$  NMR ( $\text{CDCl}_3$ )

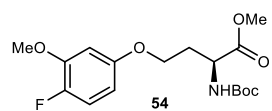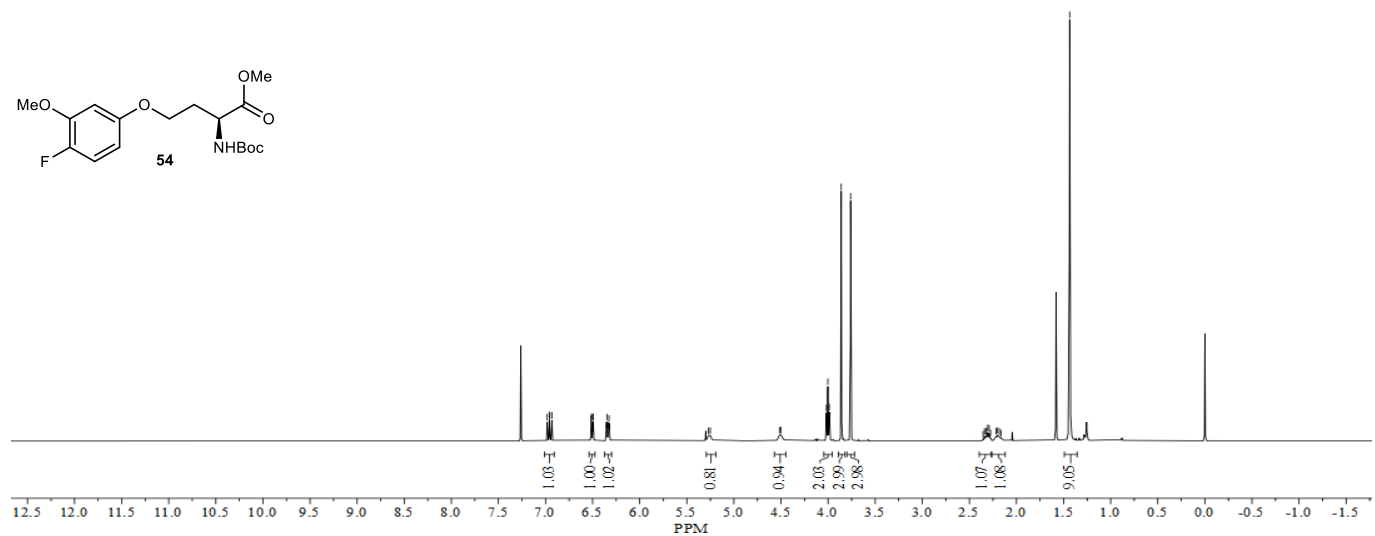



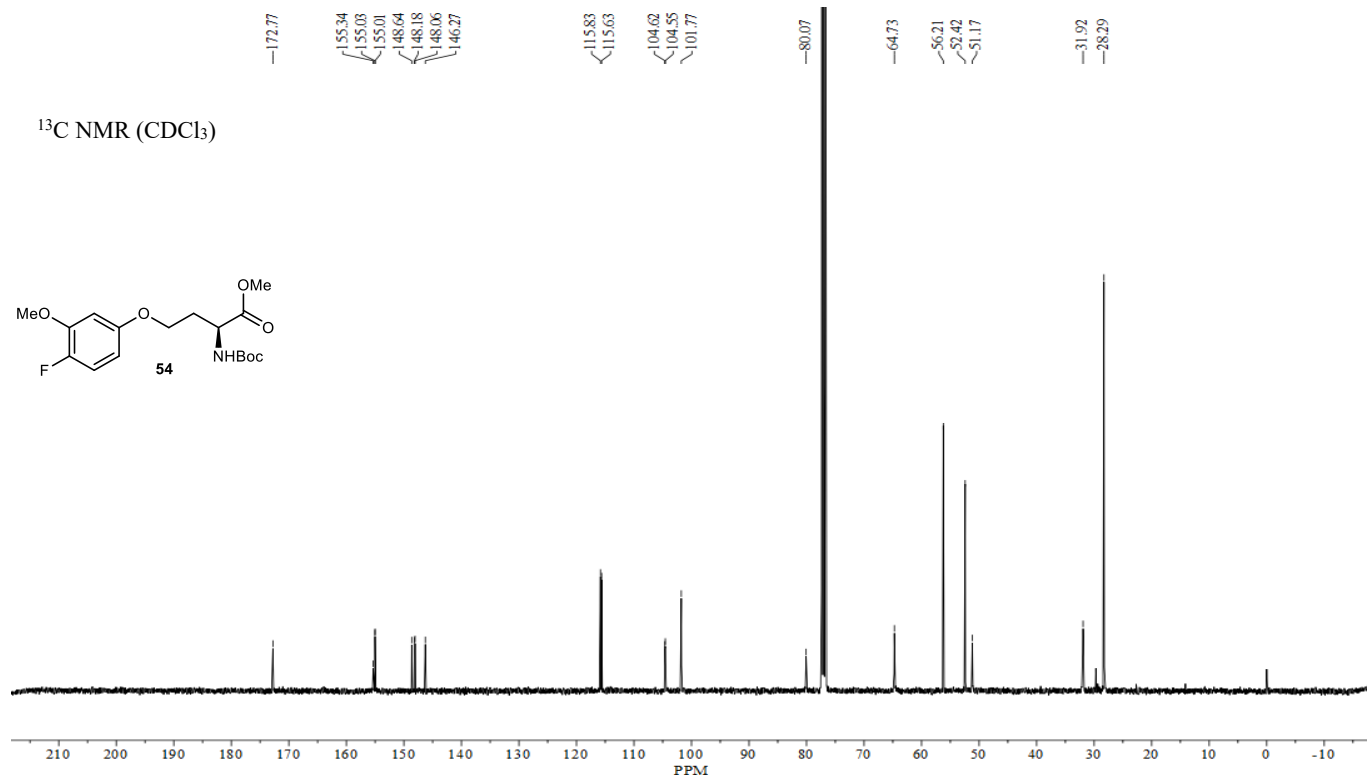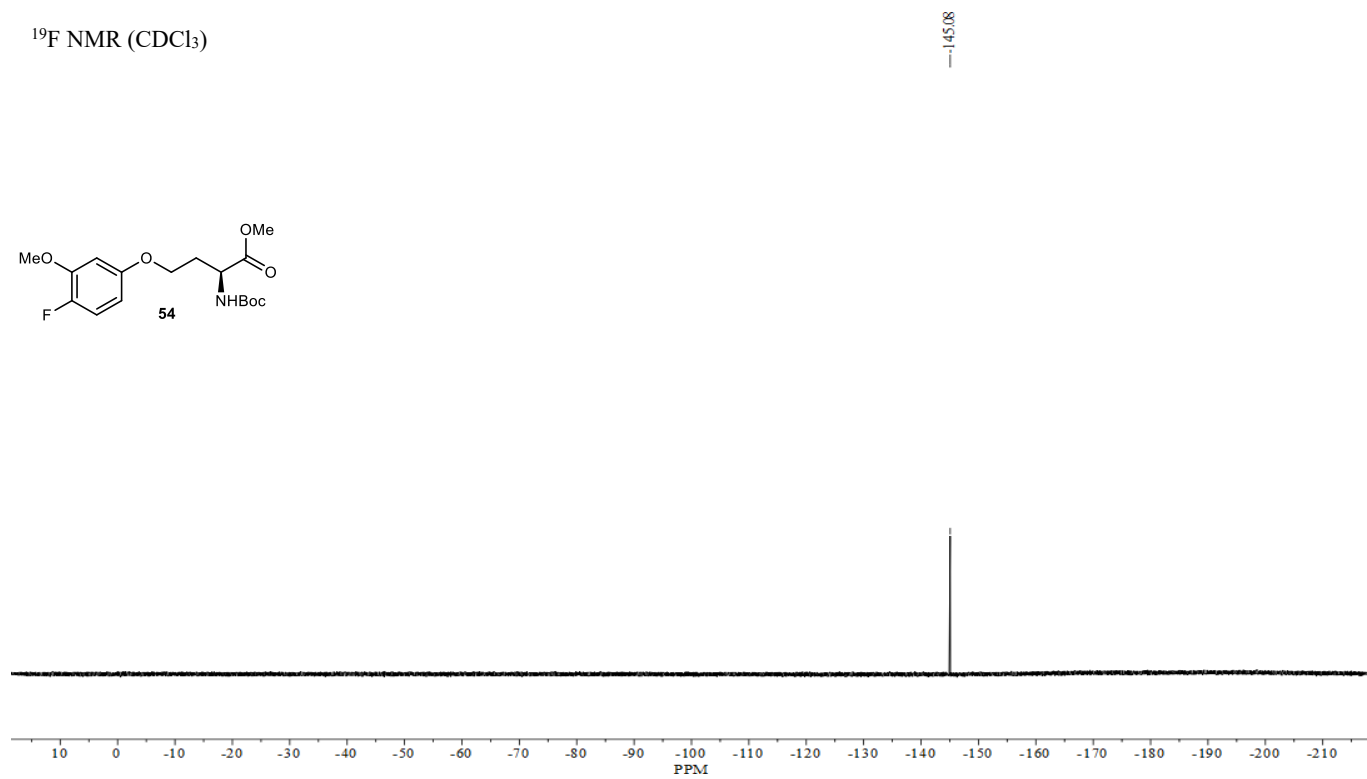

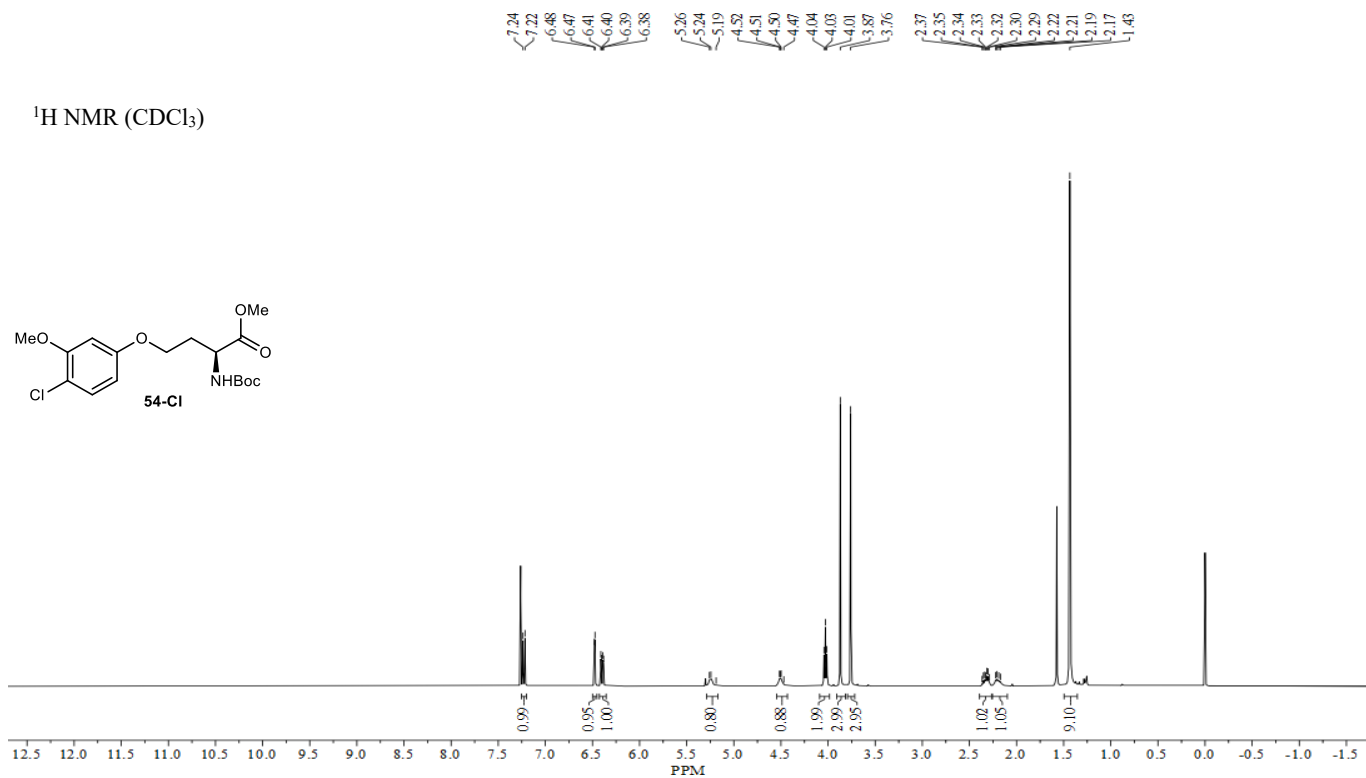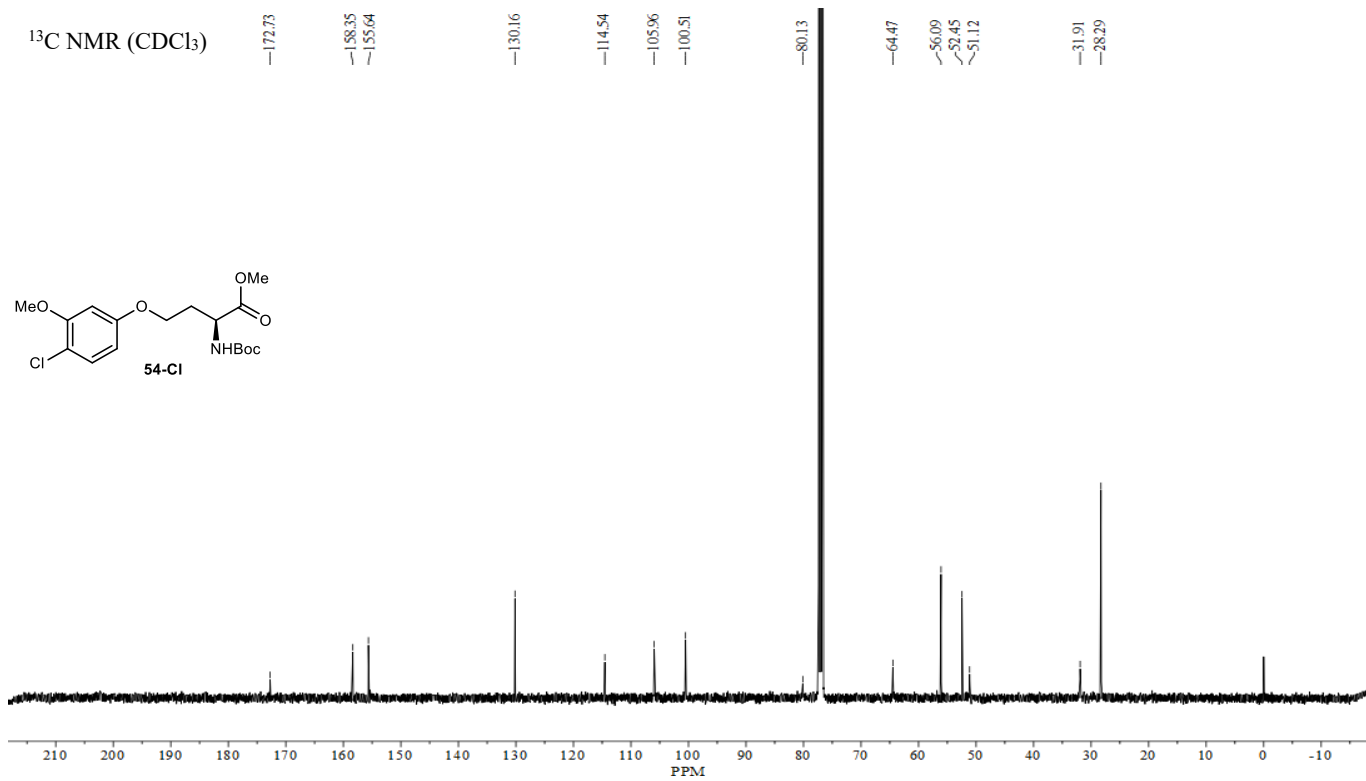

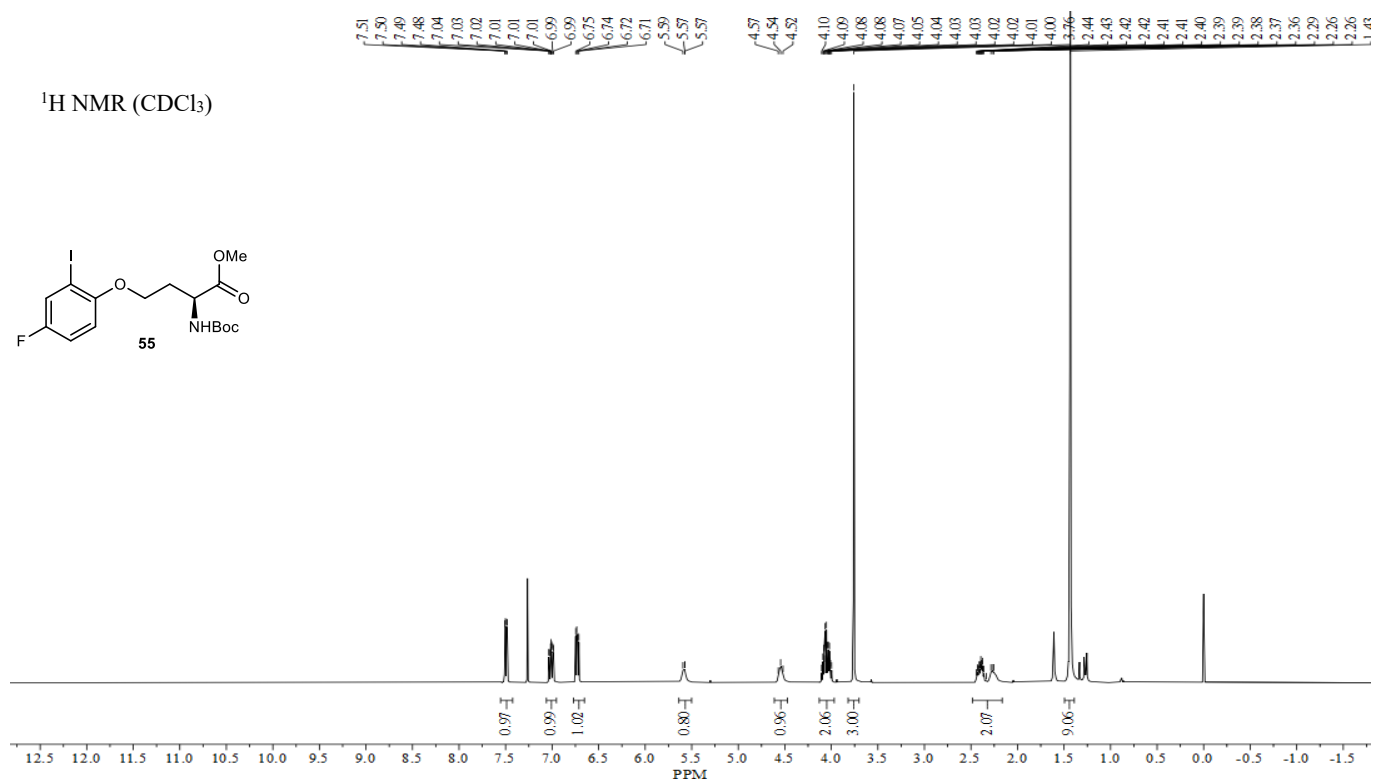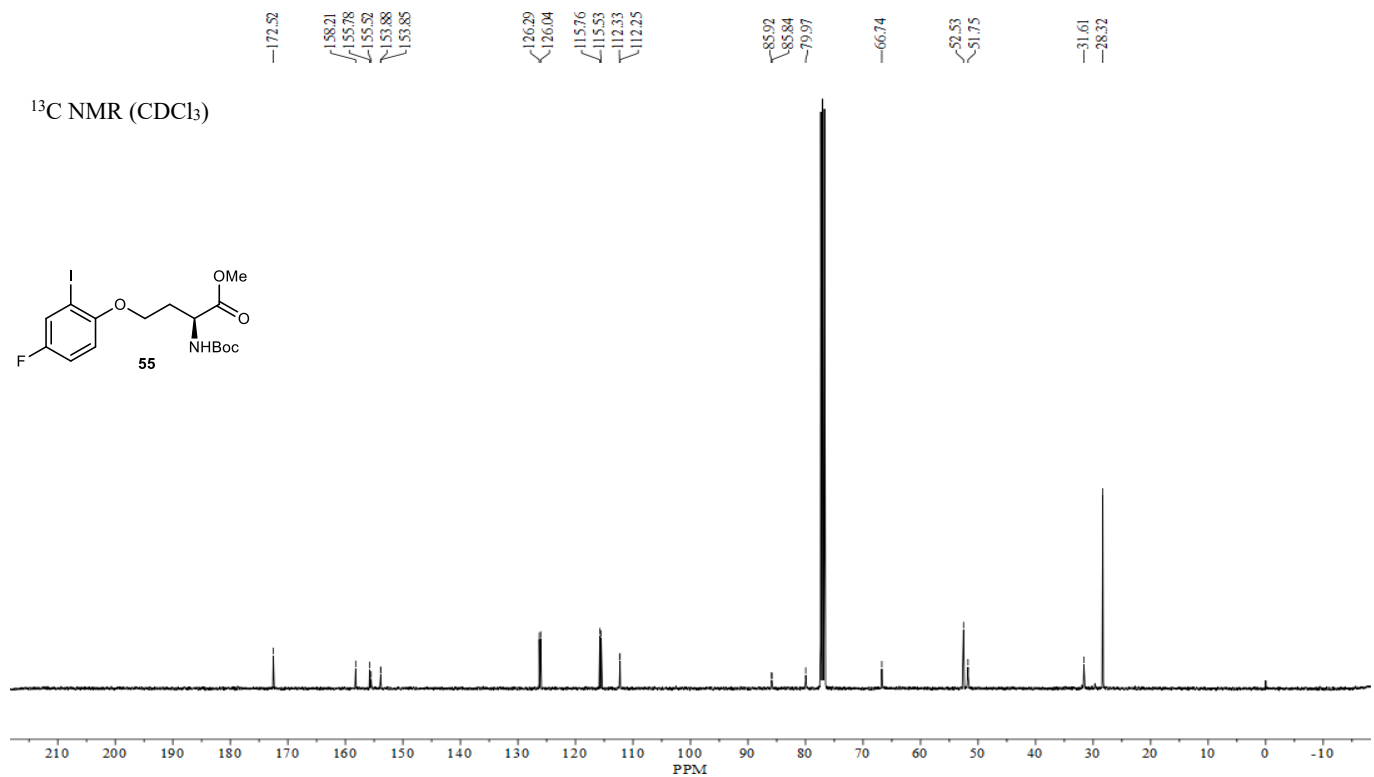

$^{19}\text{F}$  NMR ( $\text{CDCl}_3$ )

-121.61

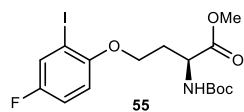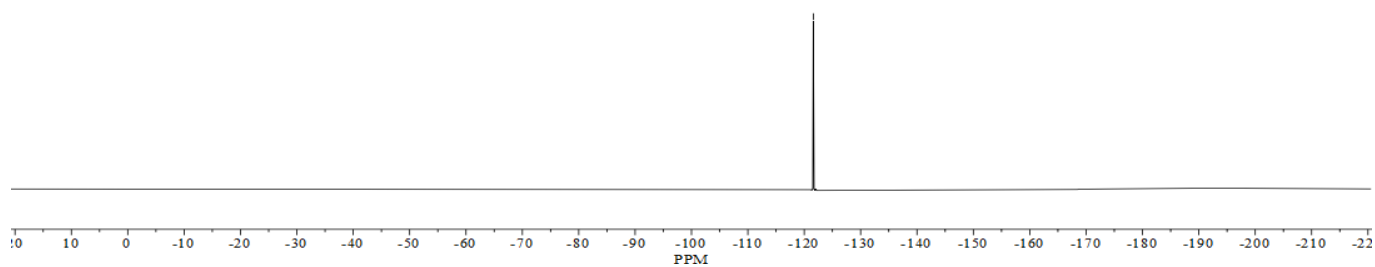

7.32  
7.30  
6.67  
6.66  
5.08  
3.85

$^1\text{H}$  NMR ( $\text{CDCl}_3$ )

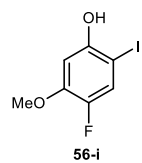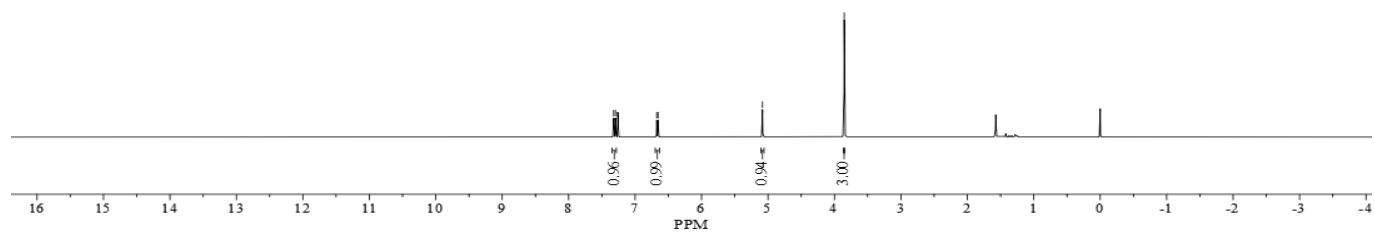

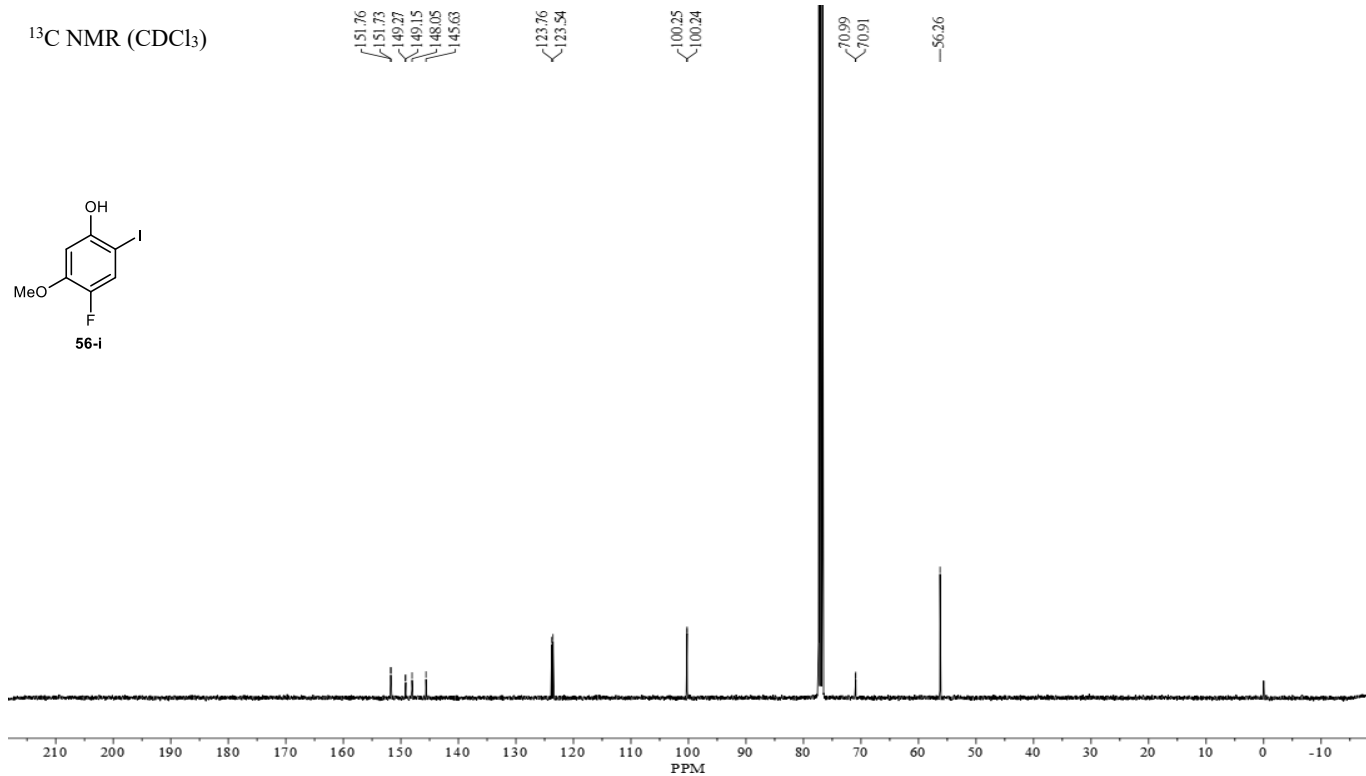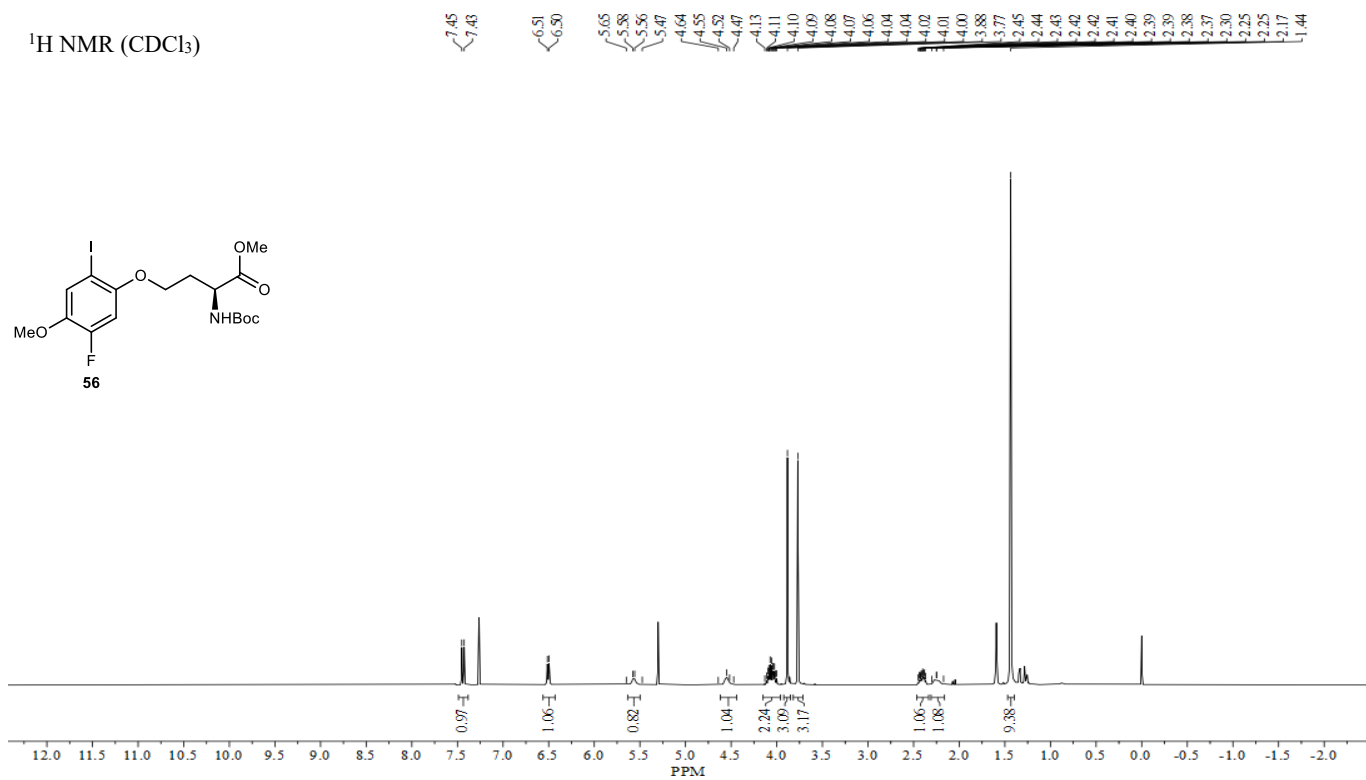

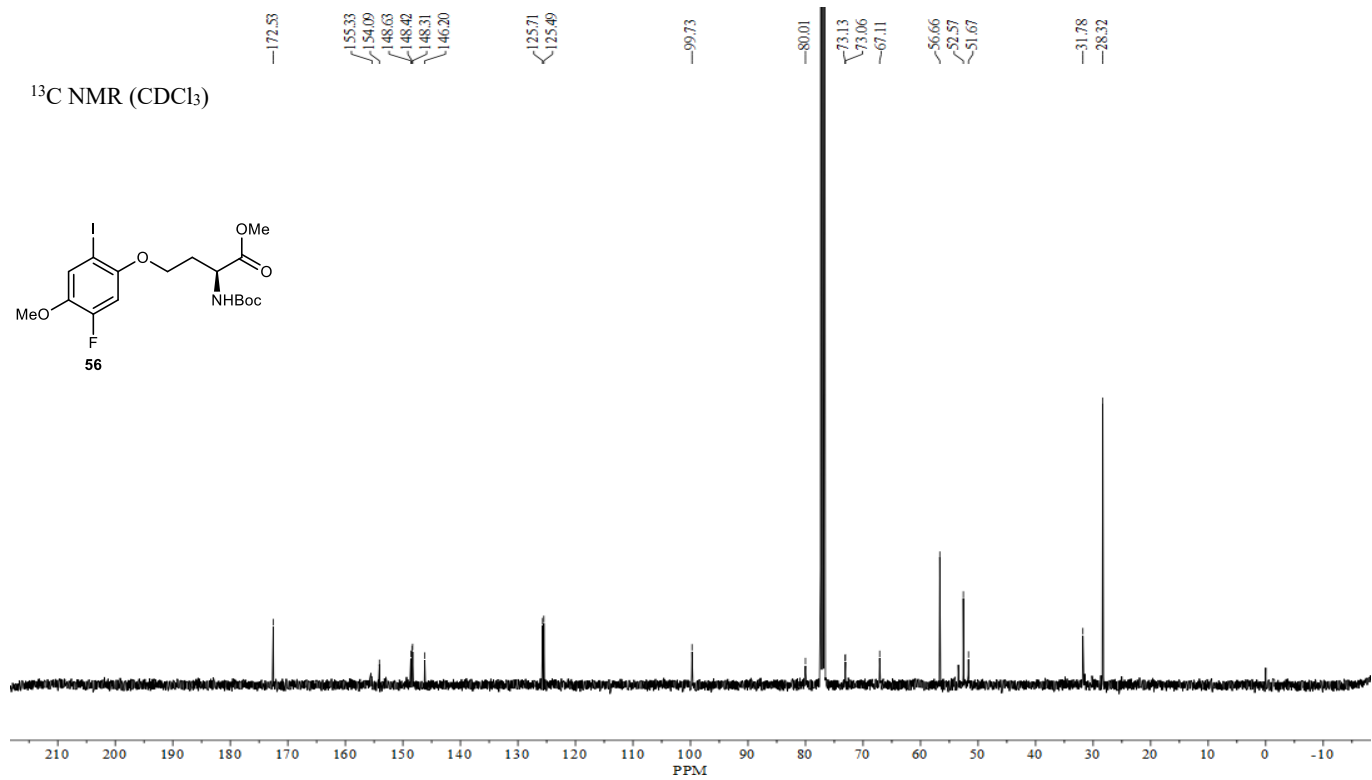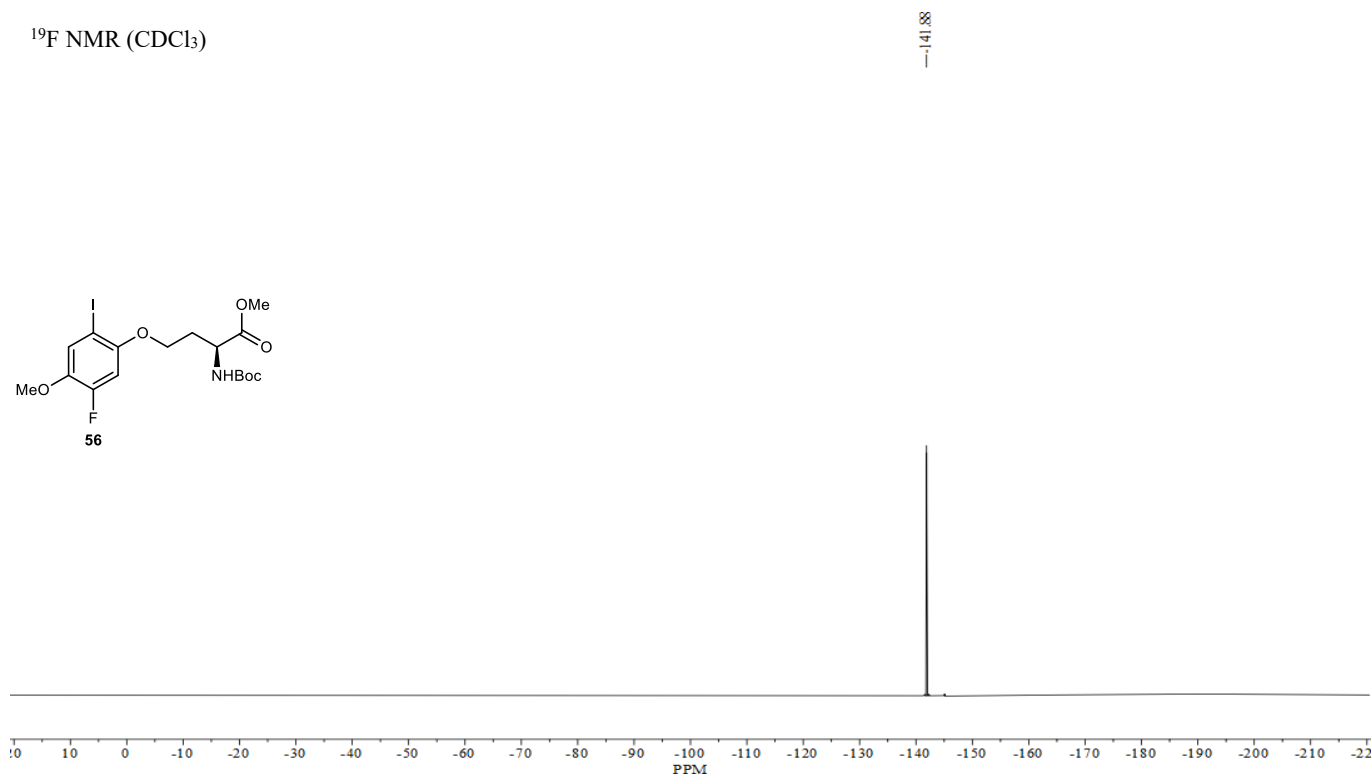

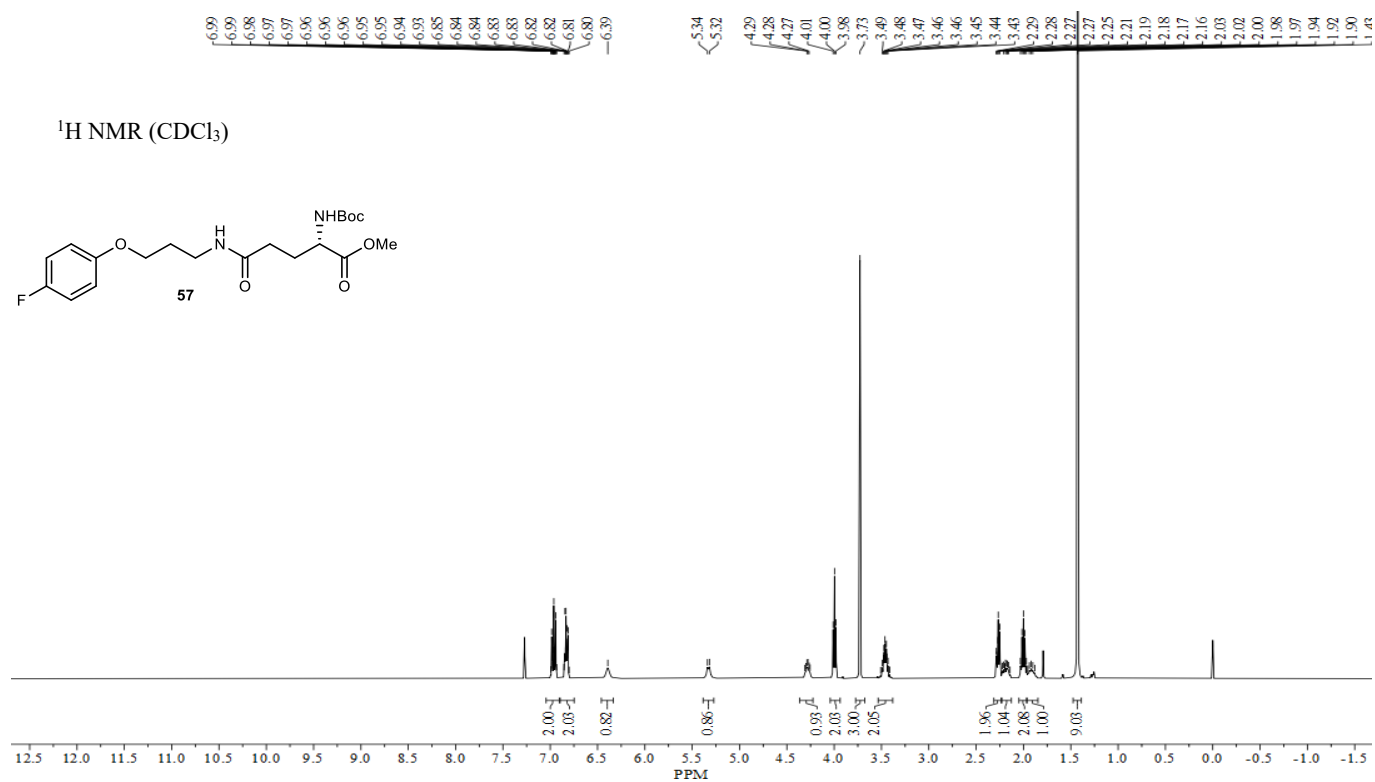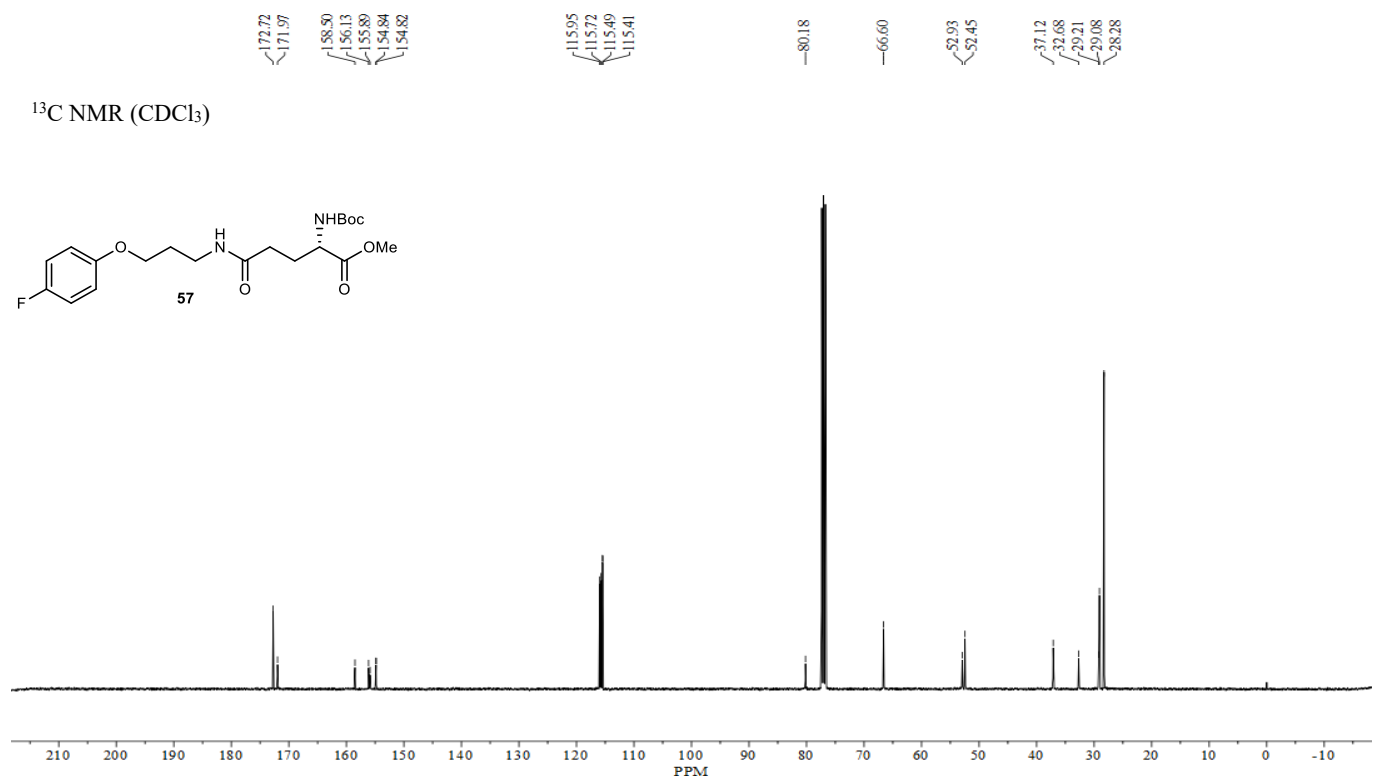

$^{19}\text{F}$  NMR ( $\text{CDCl}_3$ )

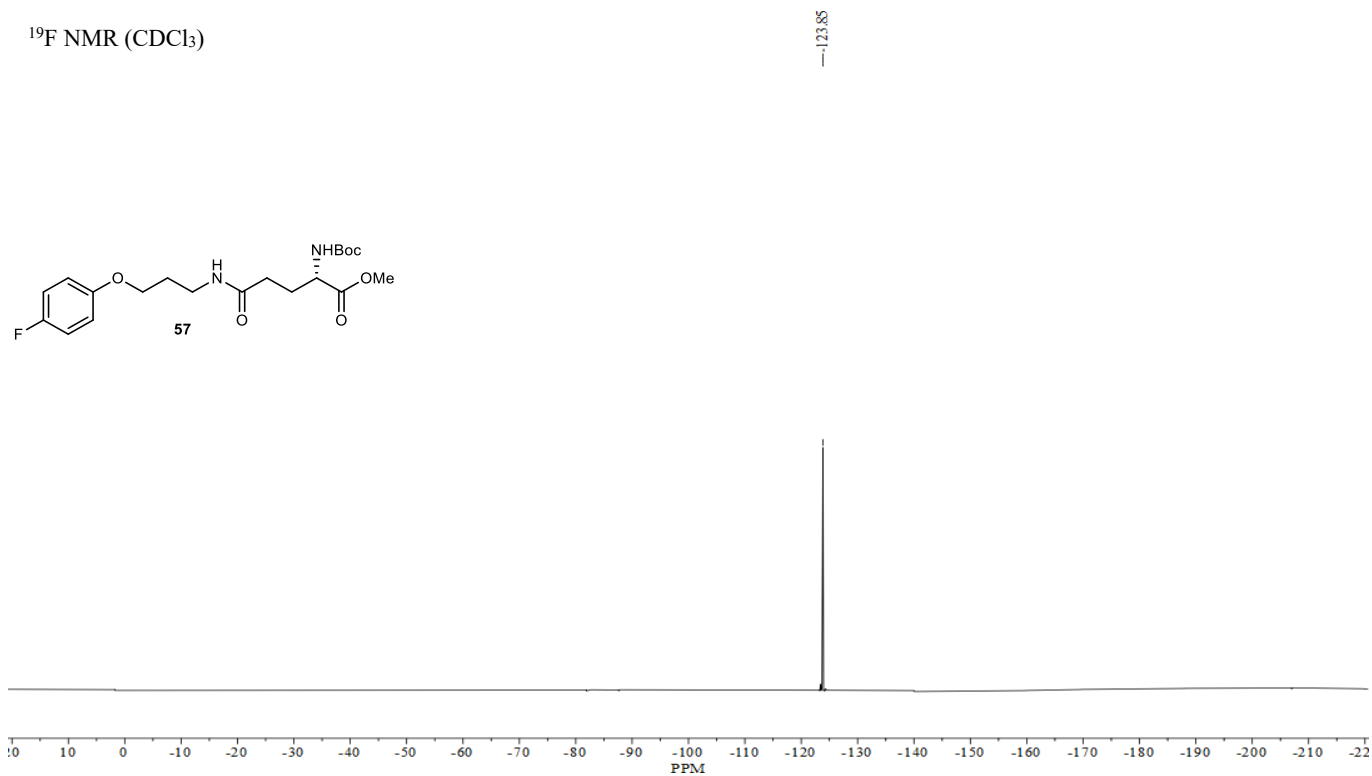

$^1\text{H}$  NMR ( $\text{CDCl}_3$ )

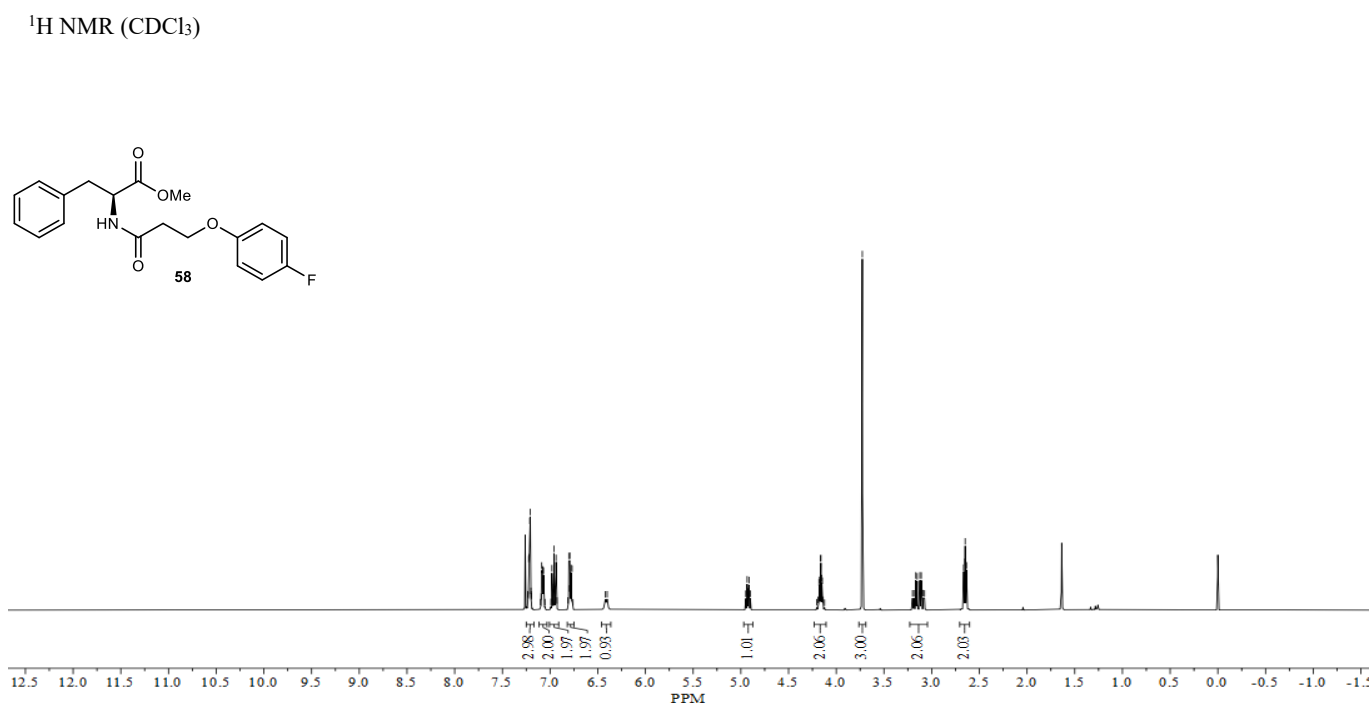



$\delta$  171.88, 170.00, 158.74, 156.37, 154.34, 154.32, 135.73, 129.27, 128.54, 127.12, 115.99, 115.78, 115.76, 115.70, 64.70, 53.11, 52.36, 37.81, 36.52

$^{13}\text{C}$  NMR ( $\text{CDCl}_3$ )

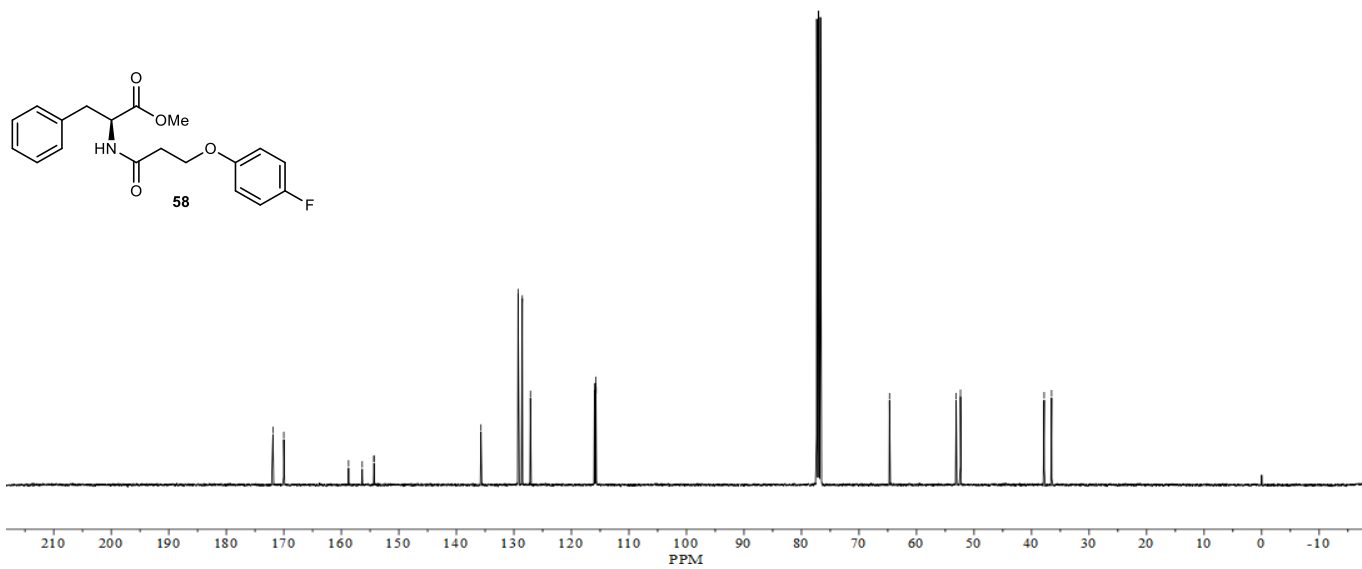

$^{19}\text{F}$  NMR ( $\text{CDCl}_3$ )

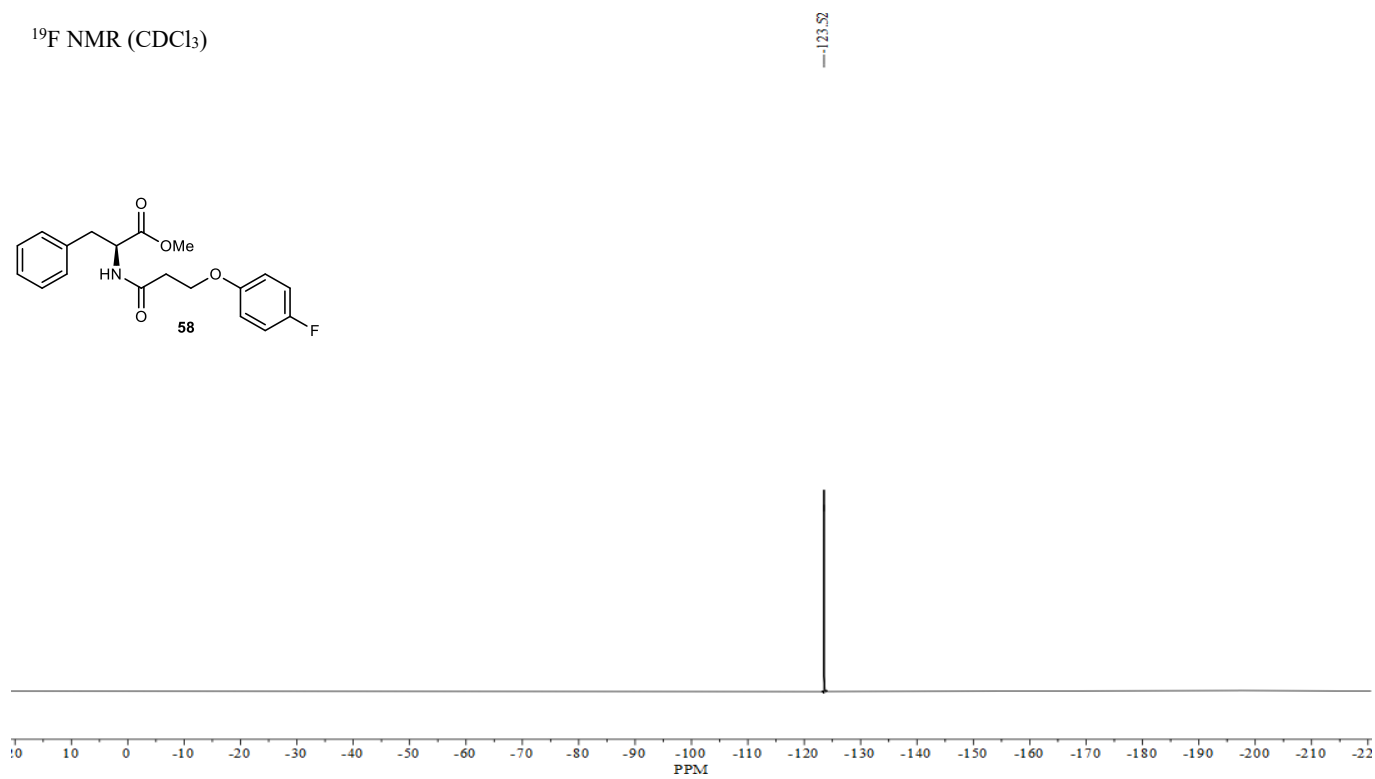

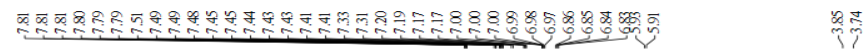

$^1\text{H}$  NMR ( $\text{CDCl}_3$ )

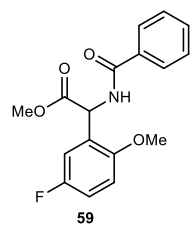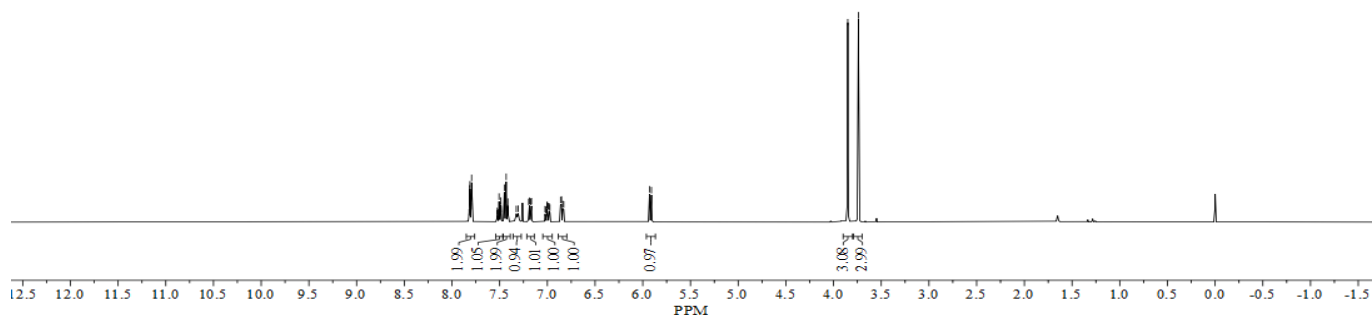

$^{13}\text{C}$  NMR ( $\text{CDCl}_3$ )

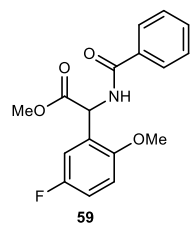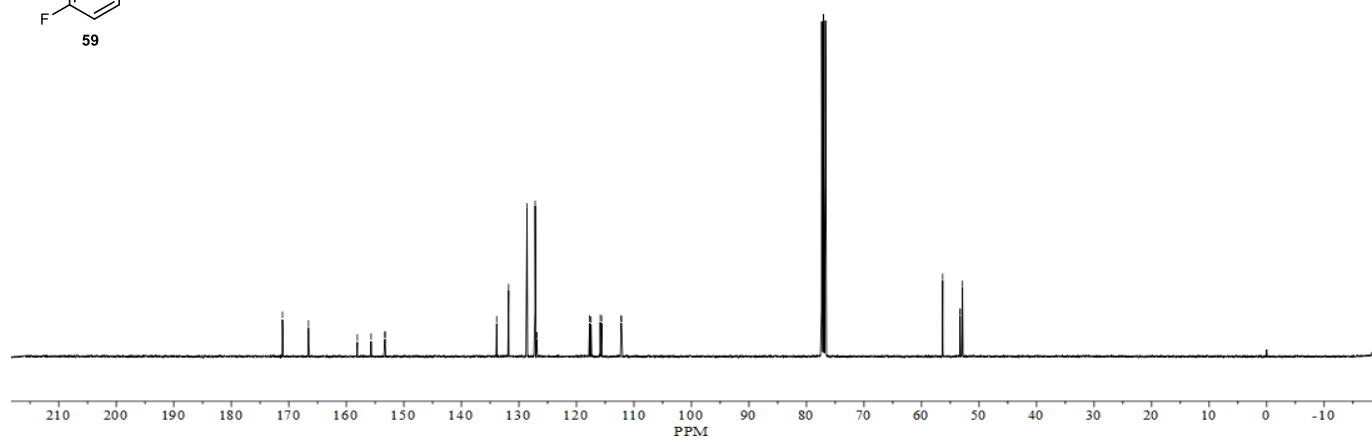

$^{19}\text{F}$  NMR ( $\text{CDCl}_3$ )

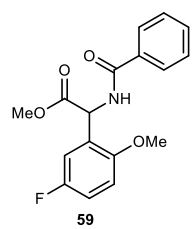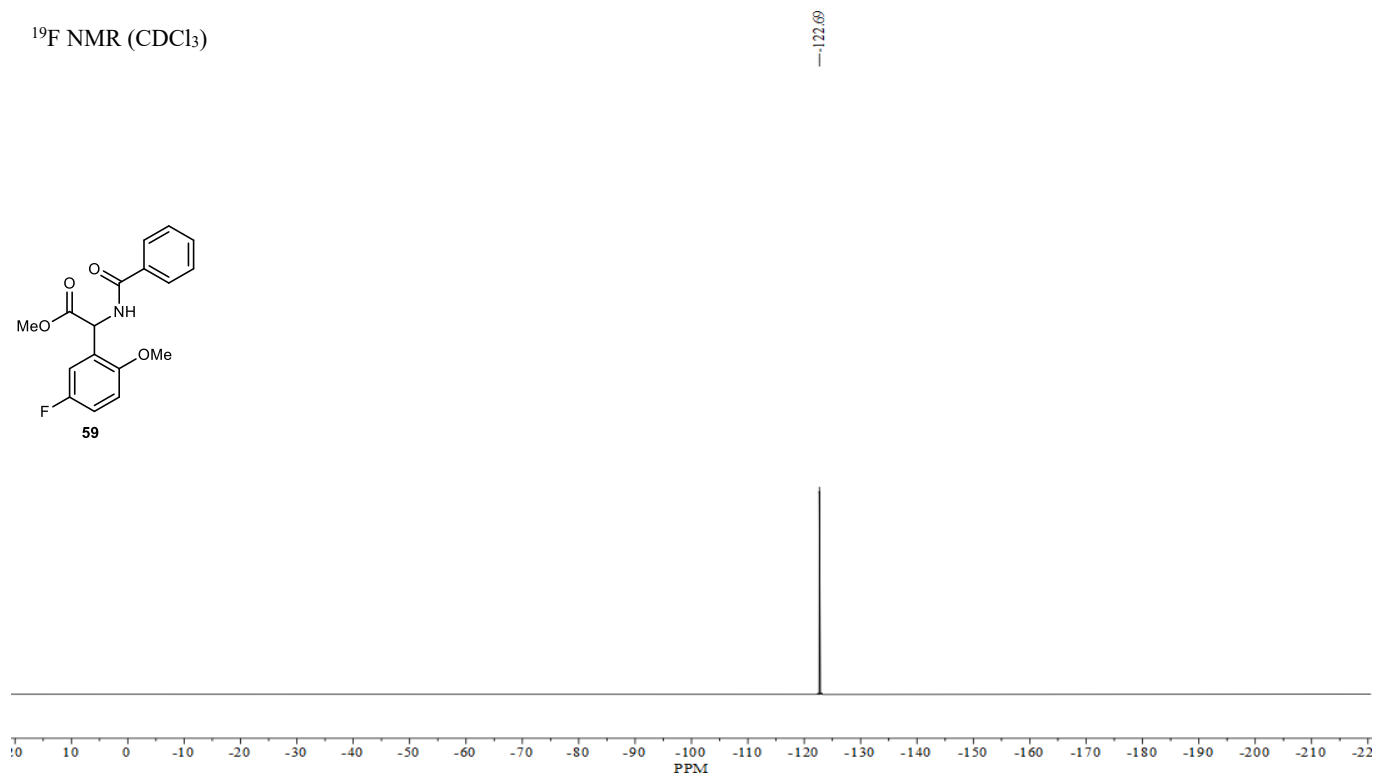

$^1\text{H}$  NMR ( $\text{DMSO}-d_6$ )

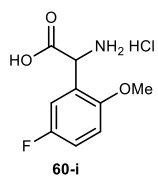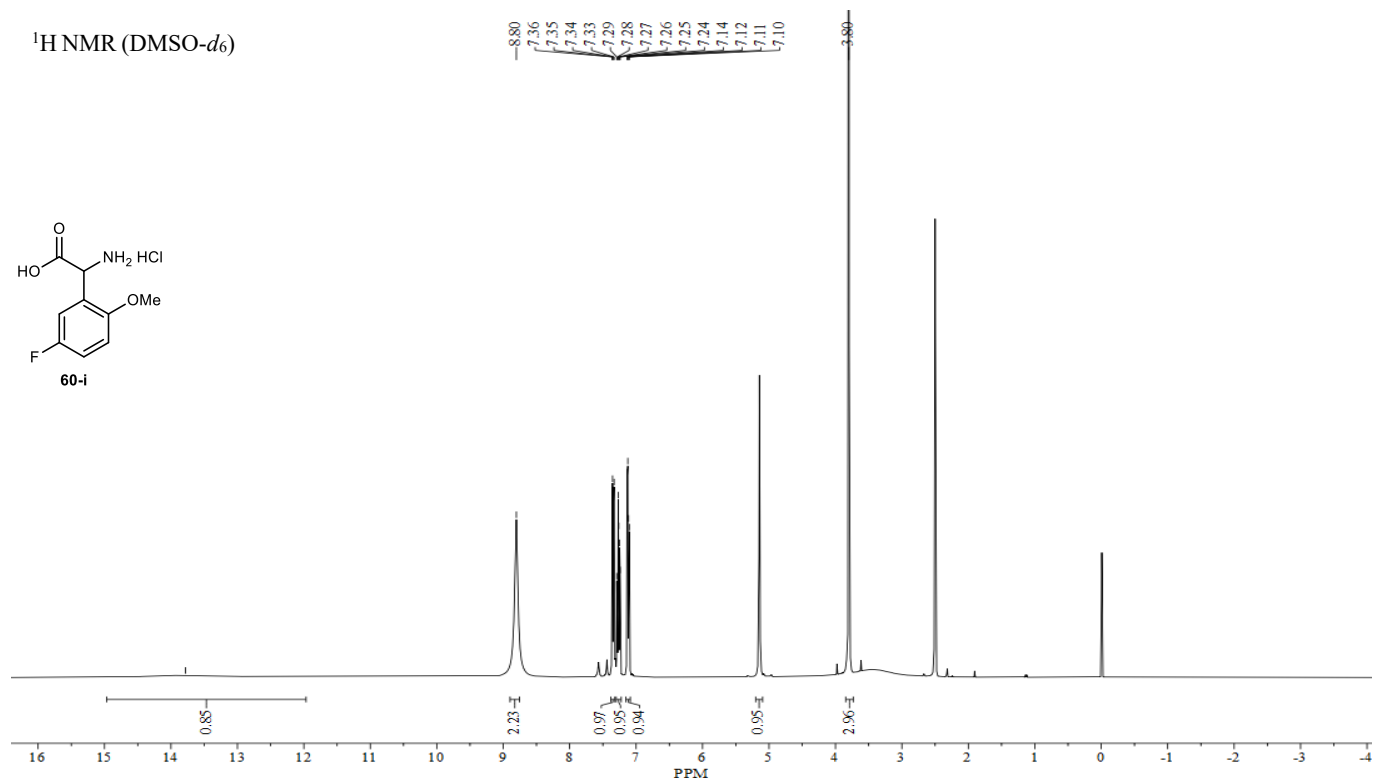

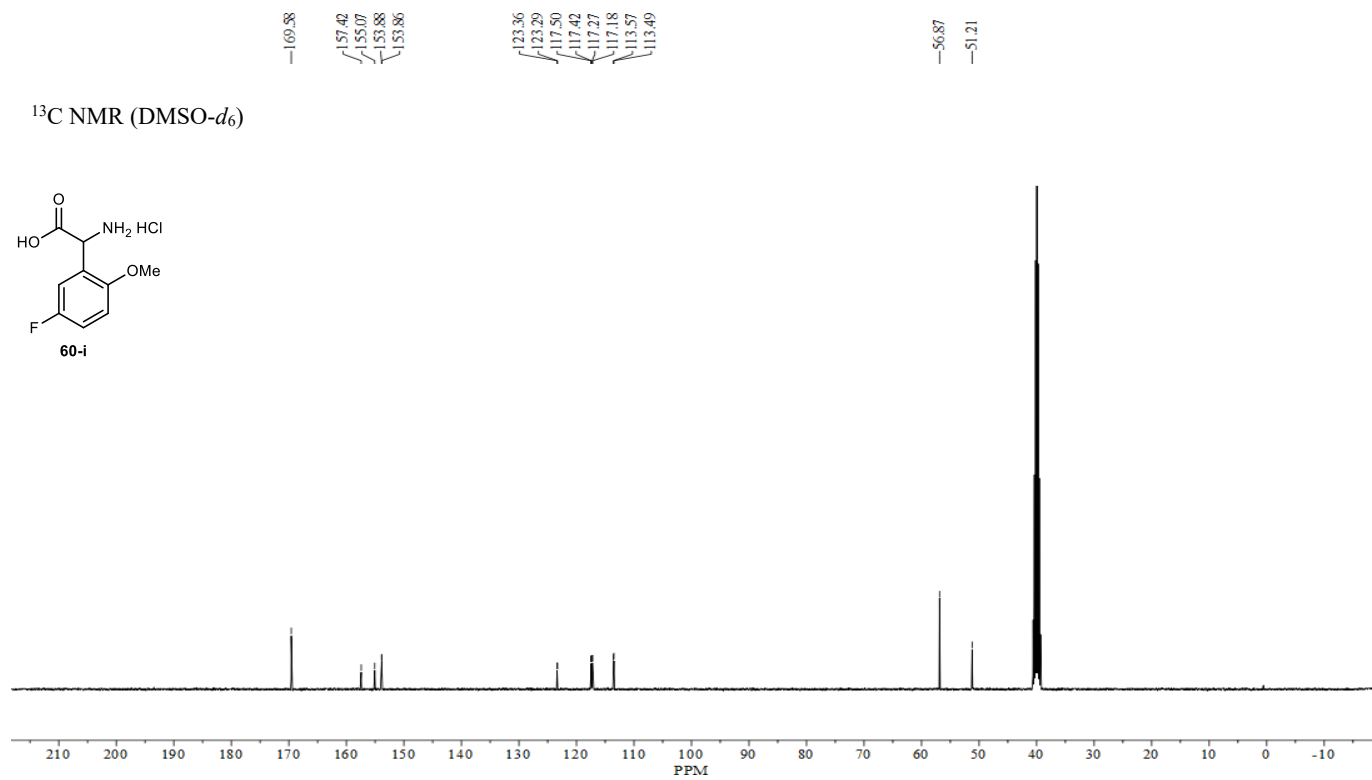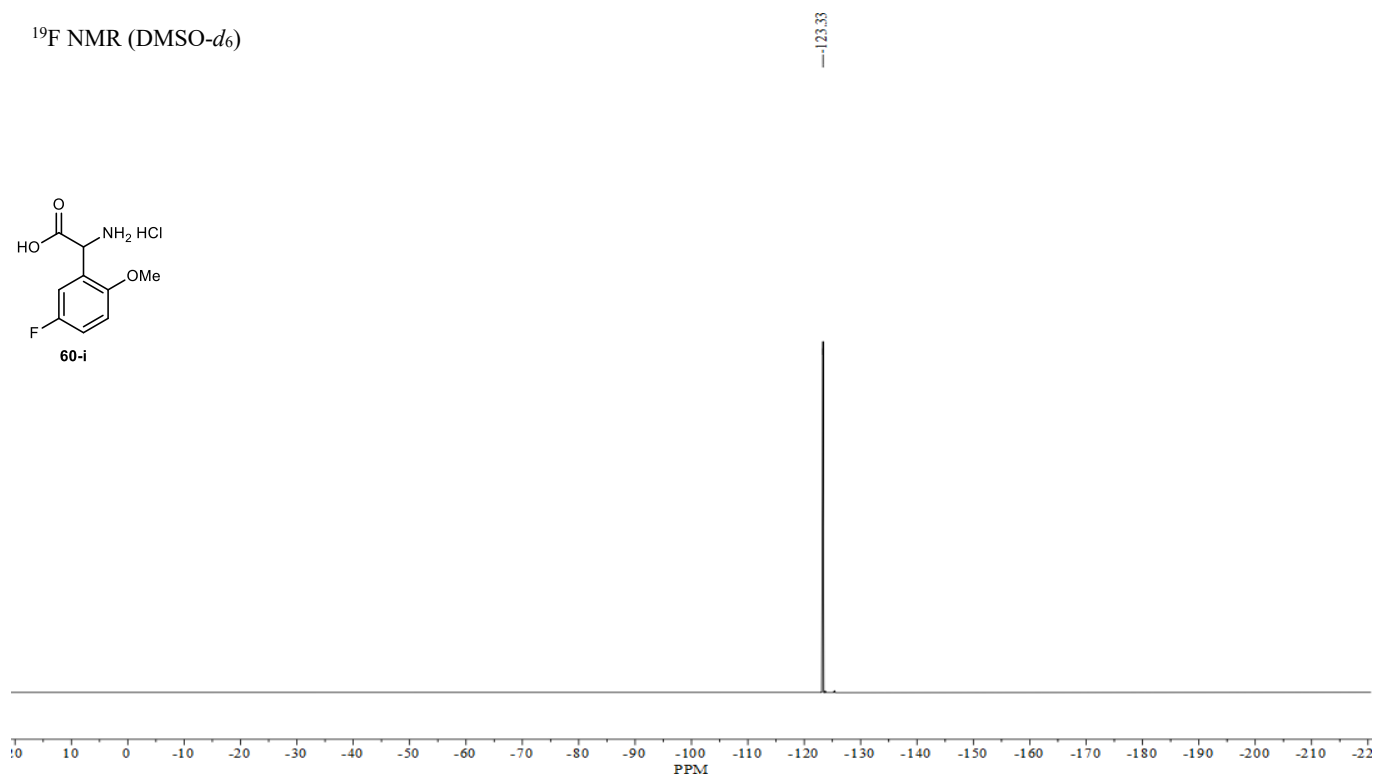

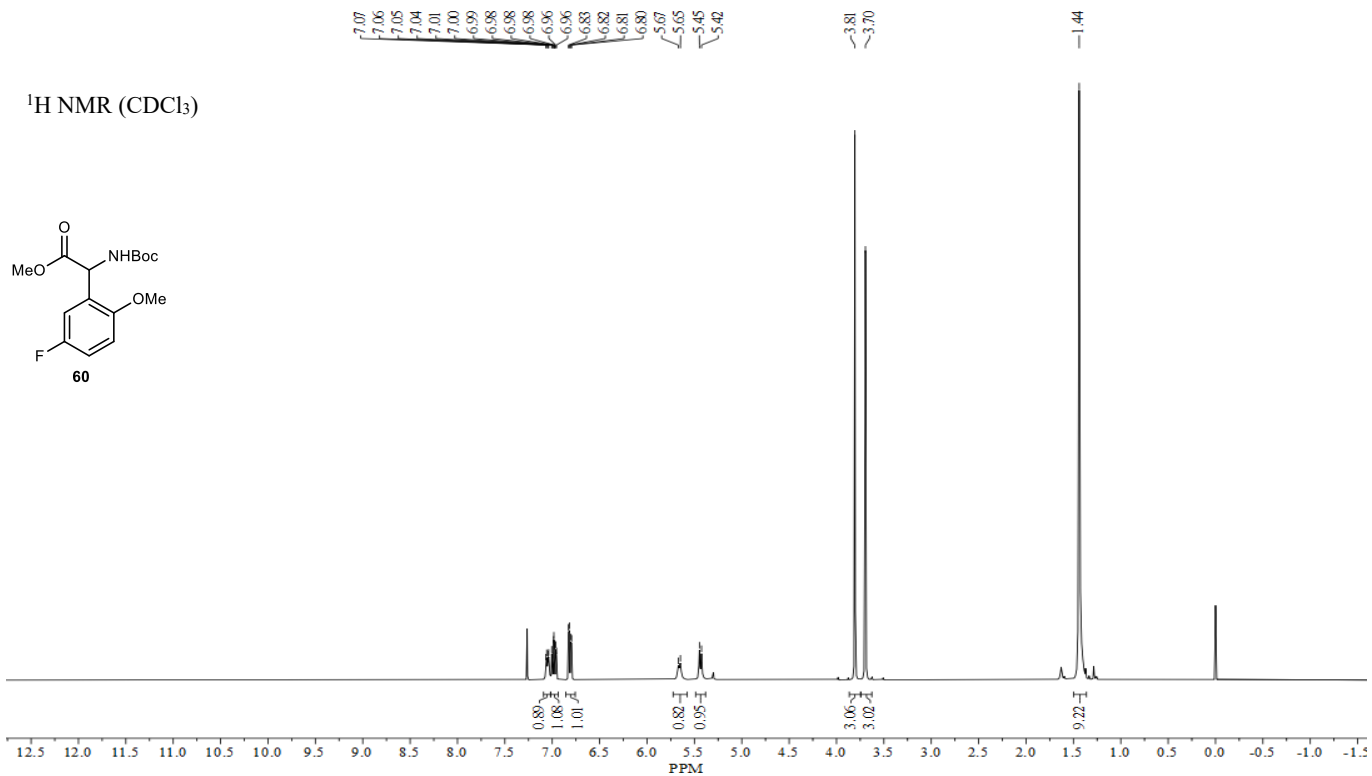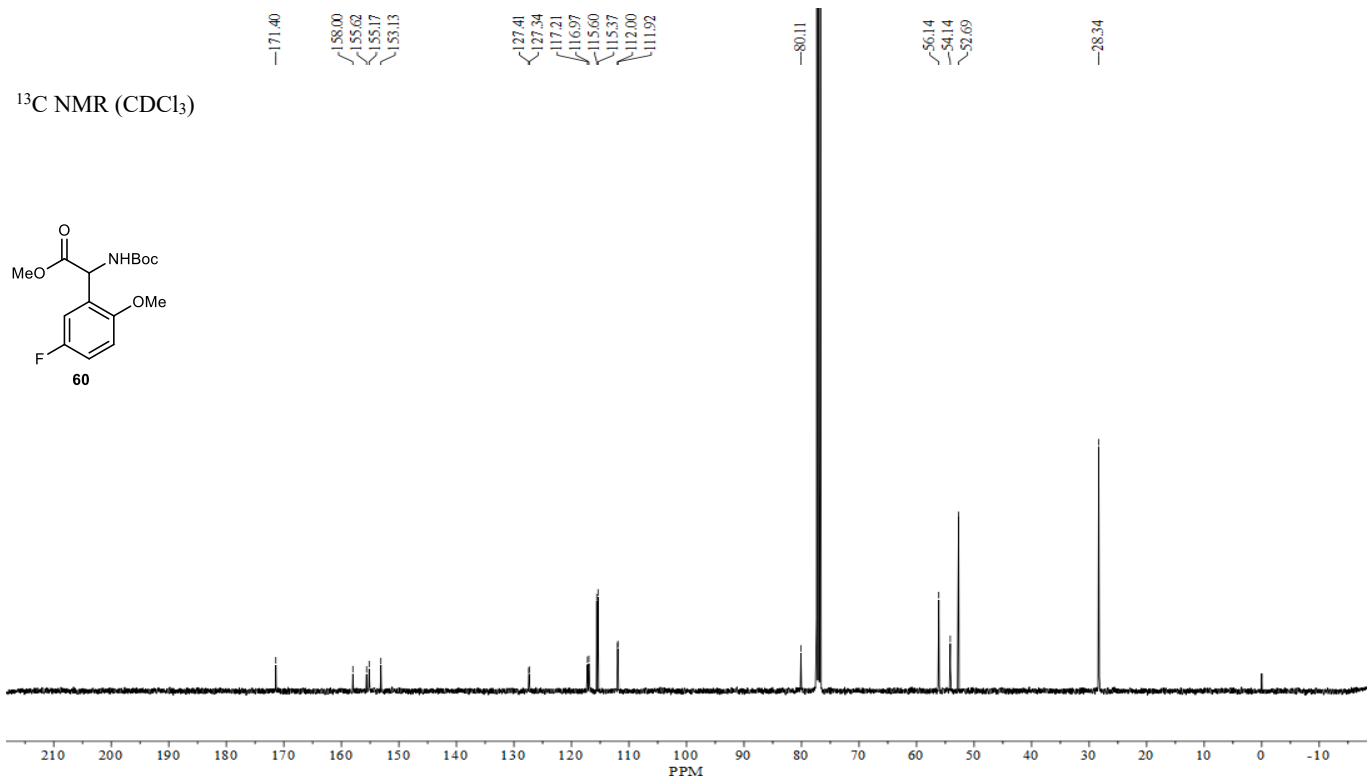

$^{19}\text{F}$  NMR ( $\text{CDCl}_3$ )

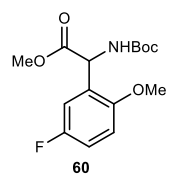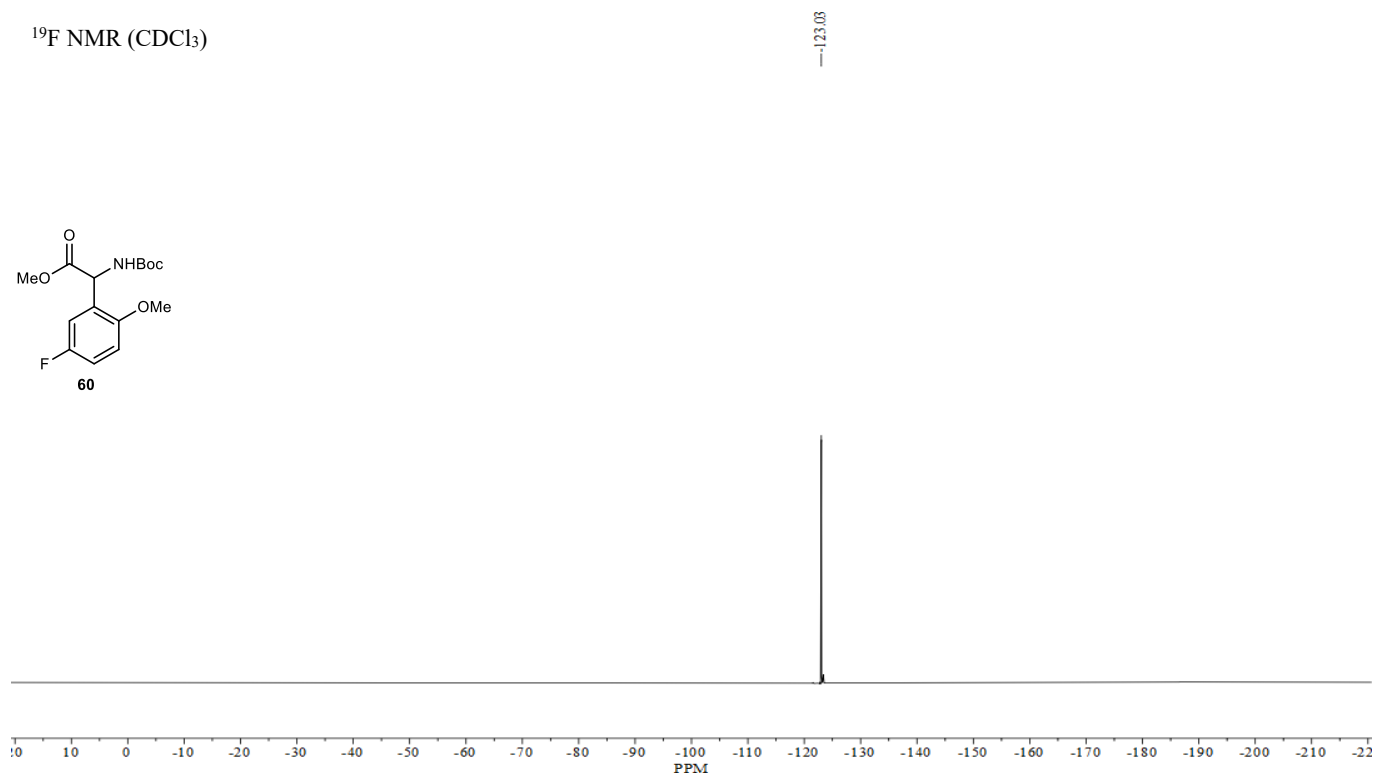

$^1\text{H}$  NMR ( $\text{DMSO}-d_6$ )

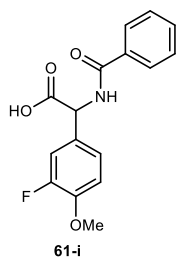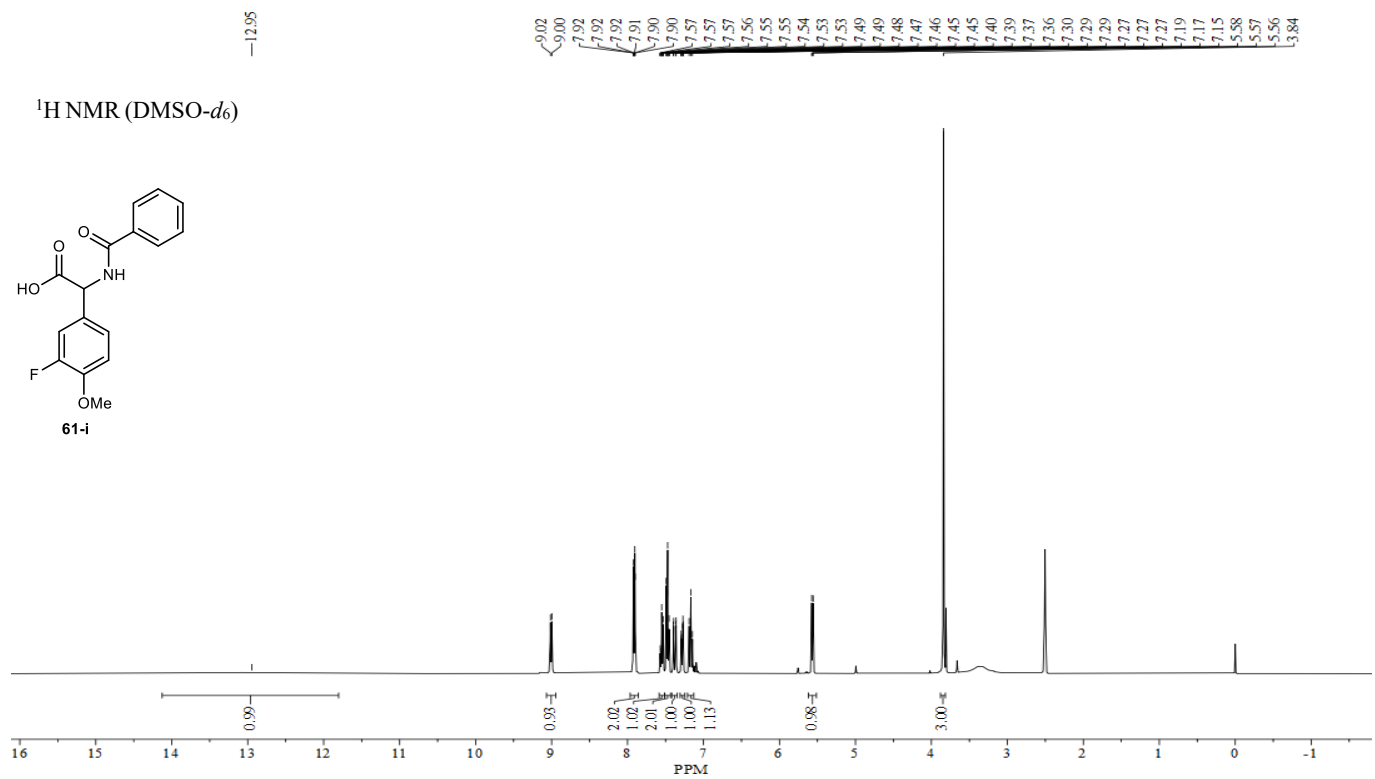

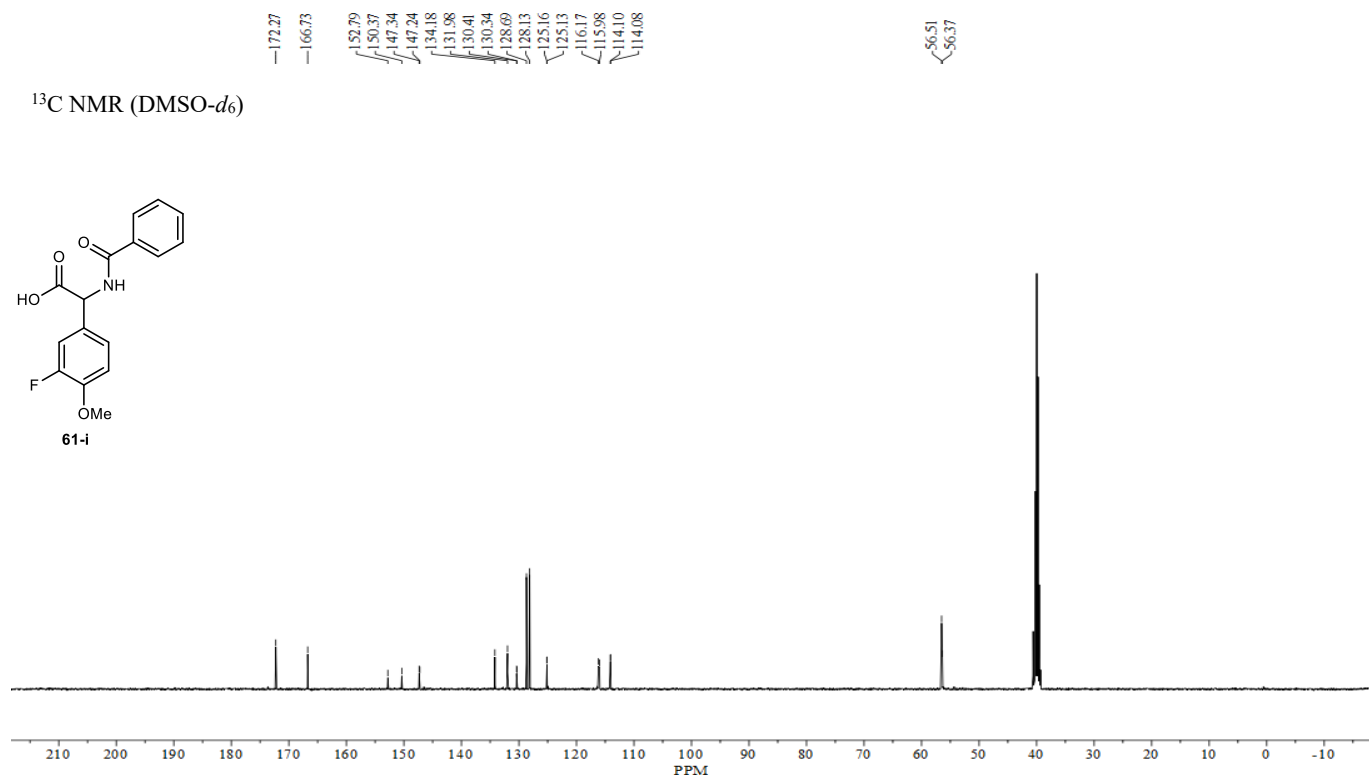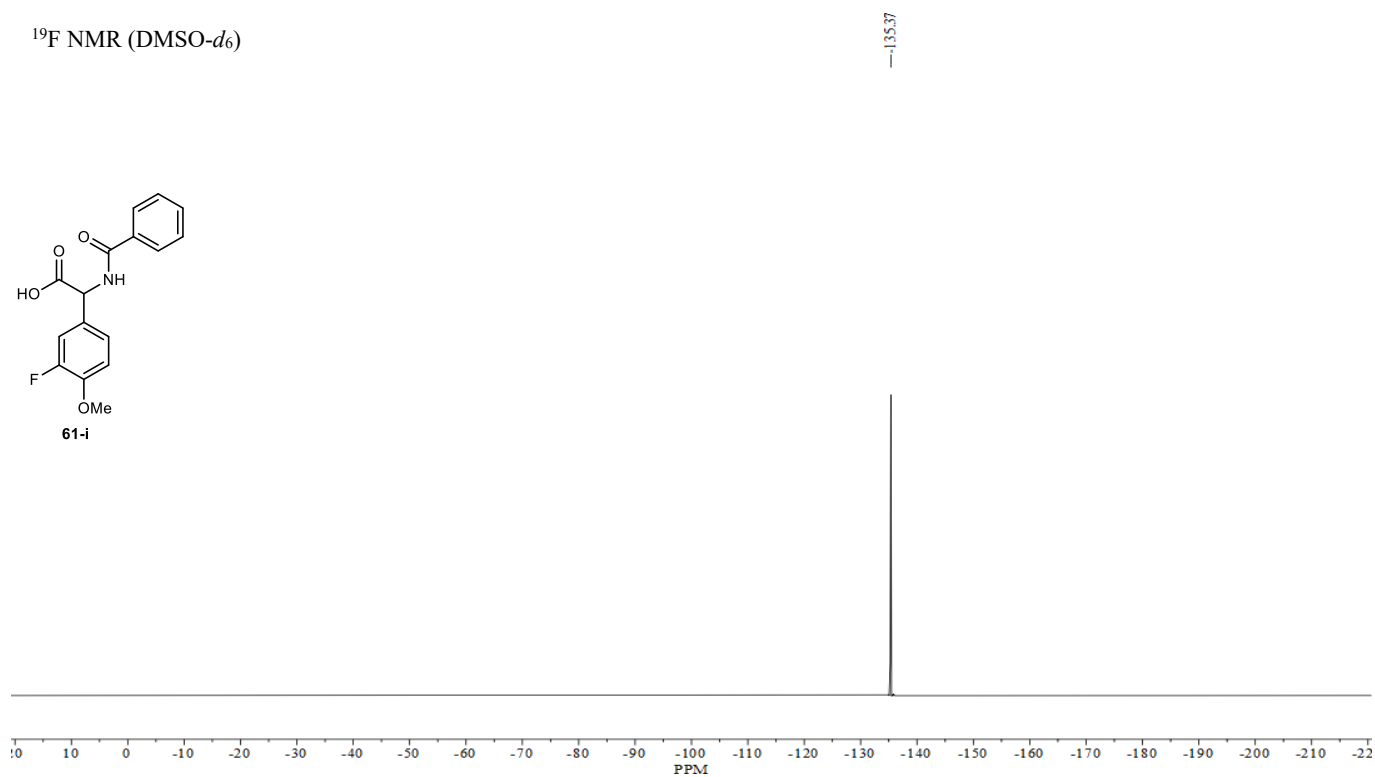

$^1\text{H}$  NMR ( $\text{CDCl}_3$ )

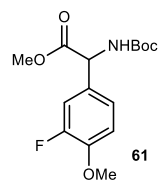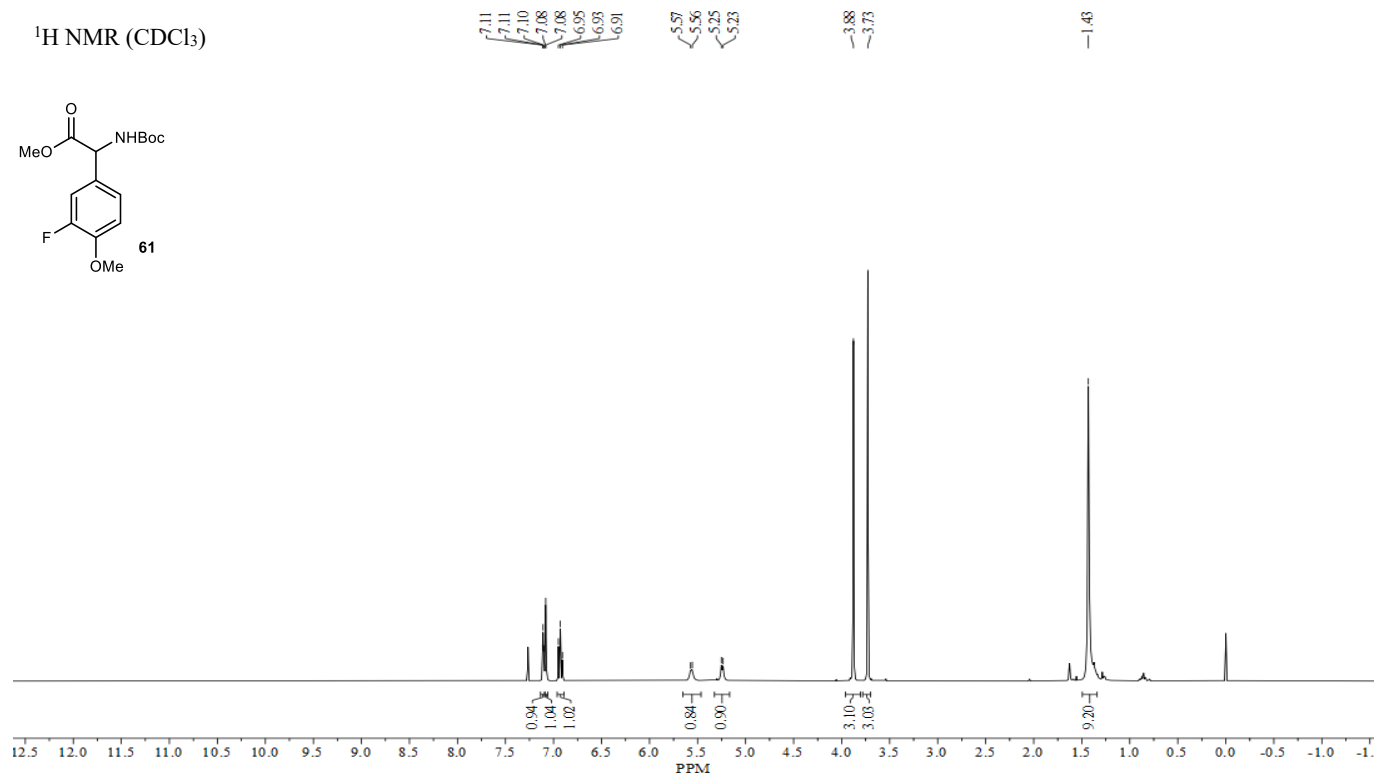

$^{13}\text{C}$  NMR ( $\text{CDCl}_3$ )

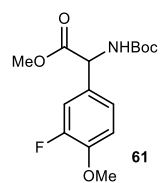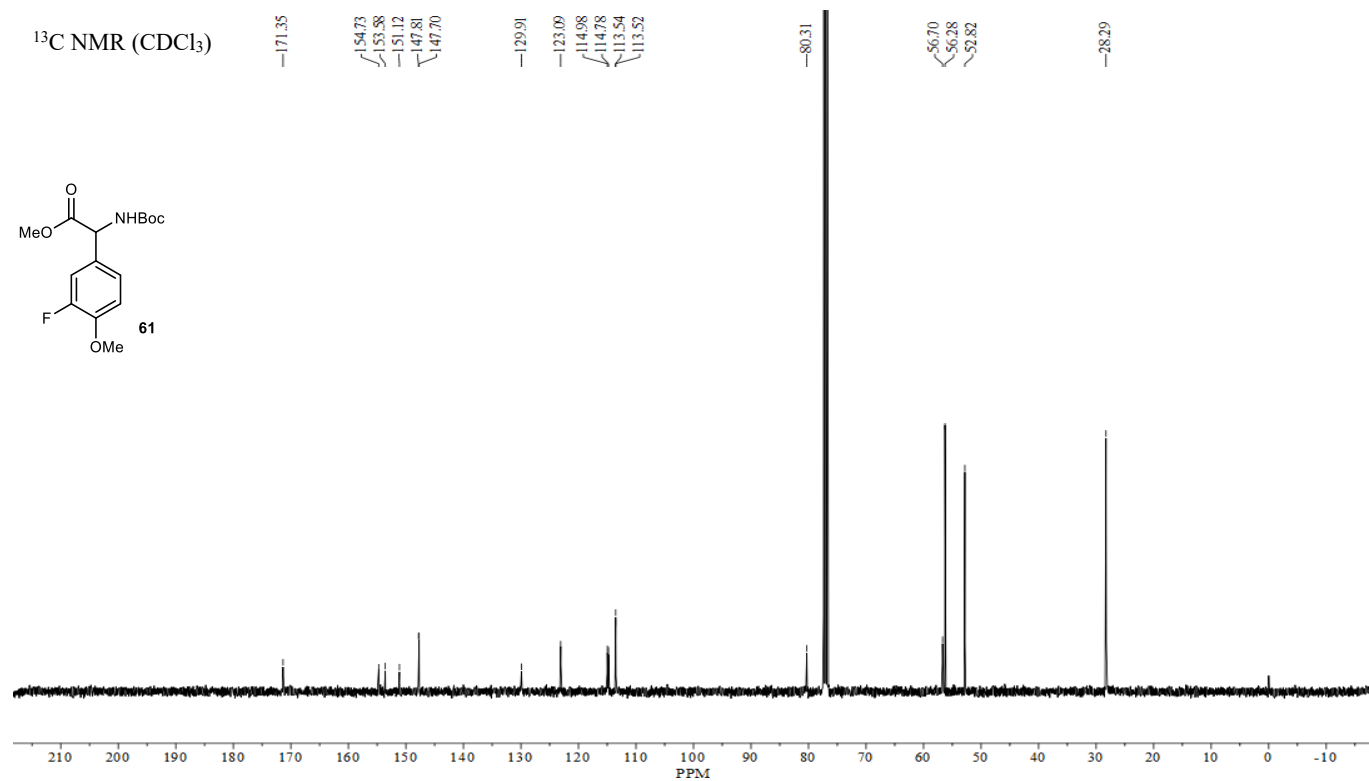



$^{19}\text{F}$  NMR ( $\text{CDCl}_3$ )

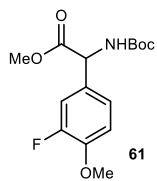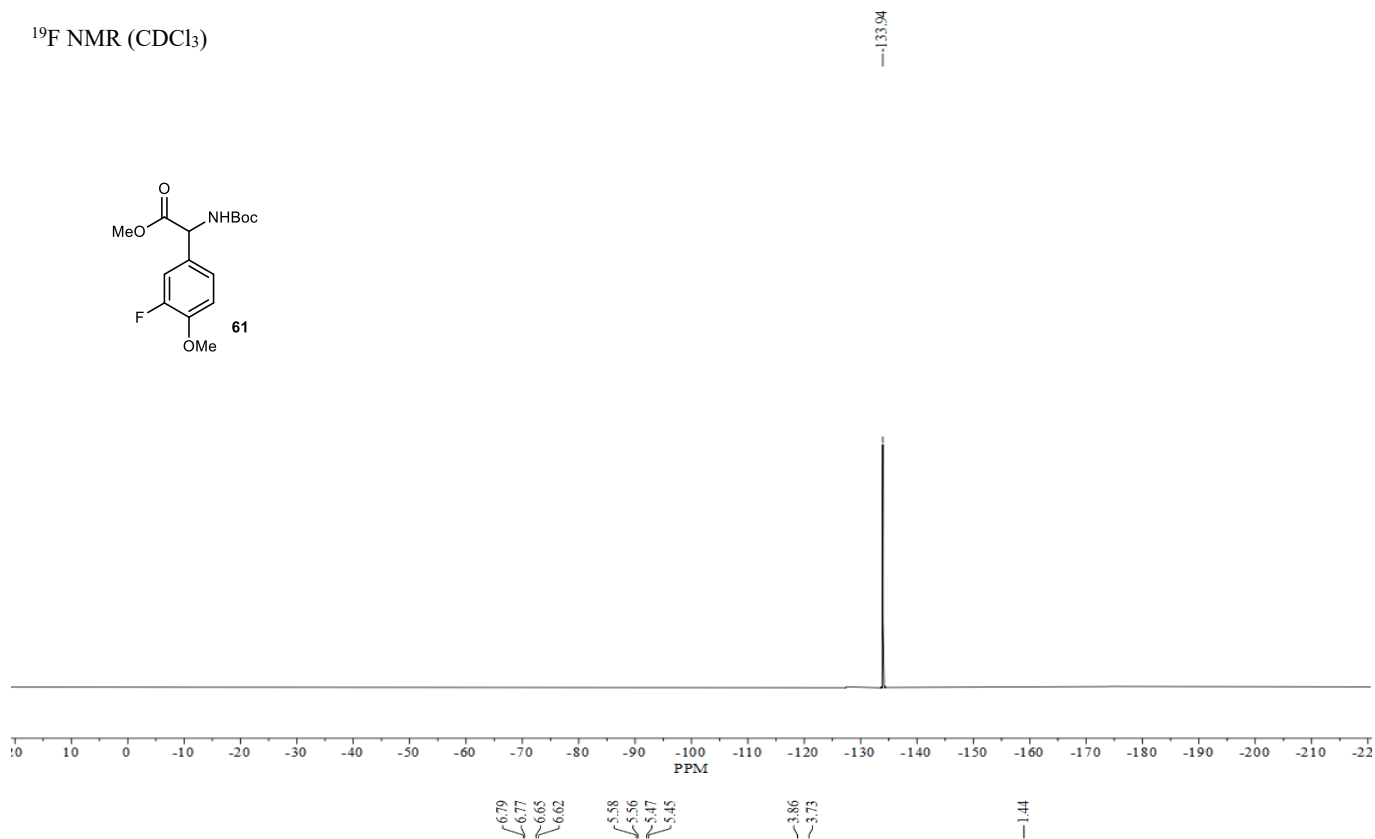

$^1\text{H}$  NMR ( $\text{CDCl}_3$ )

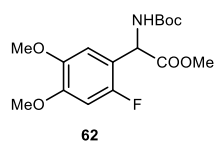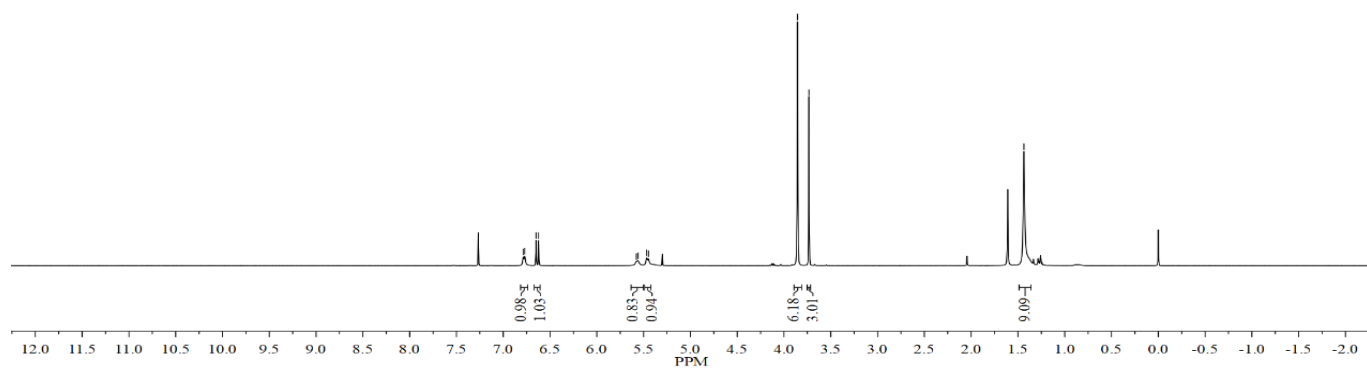

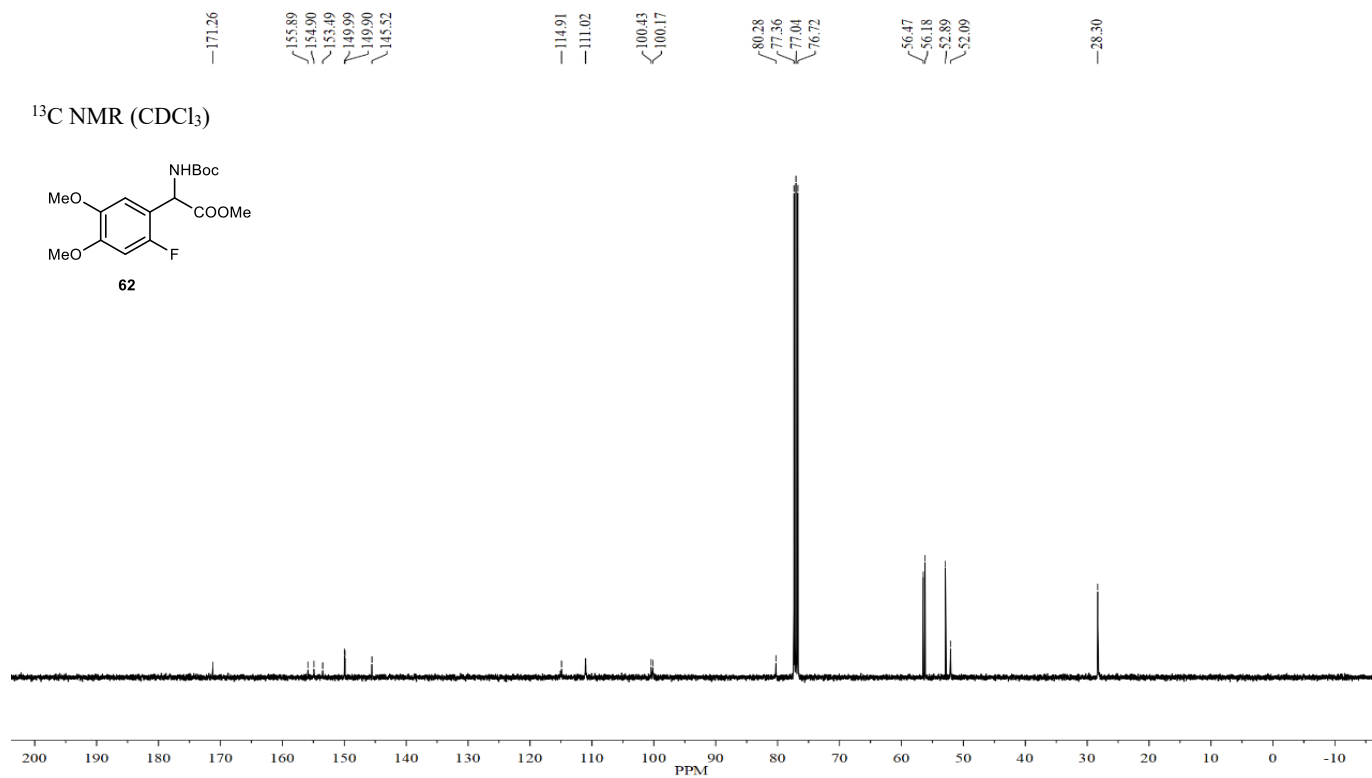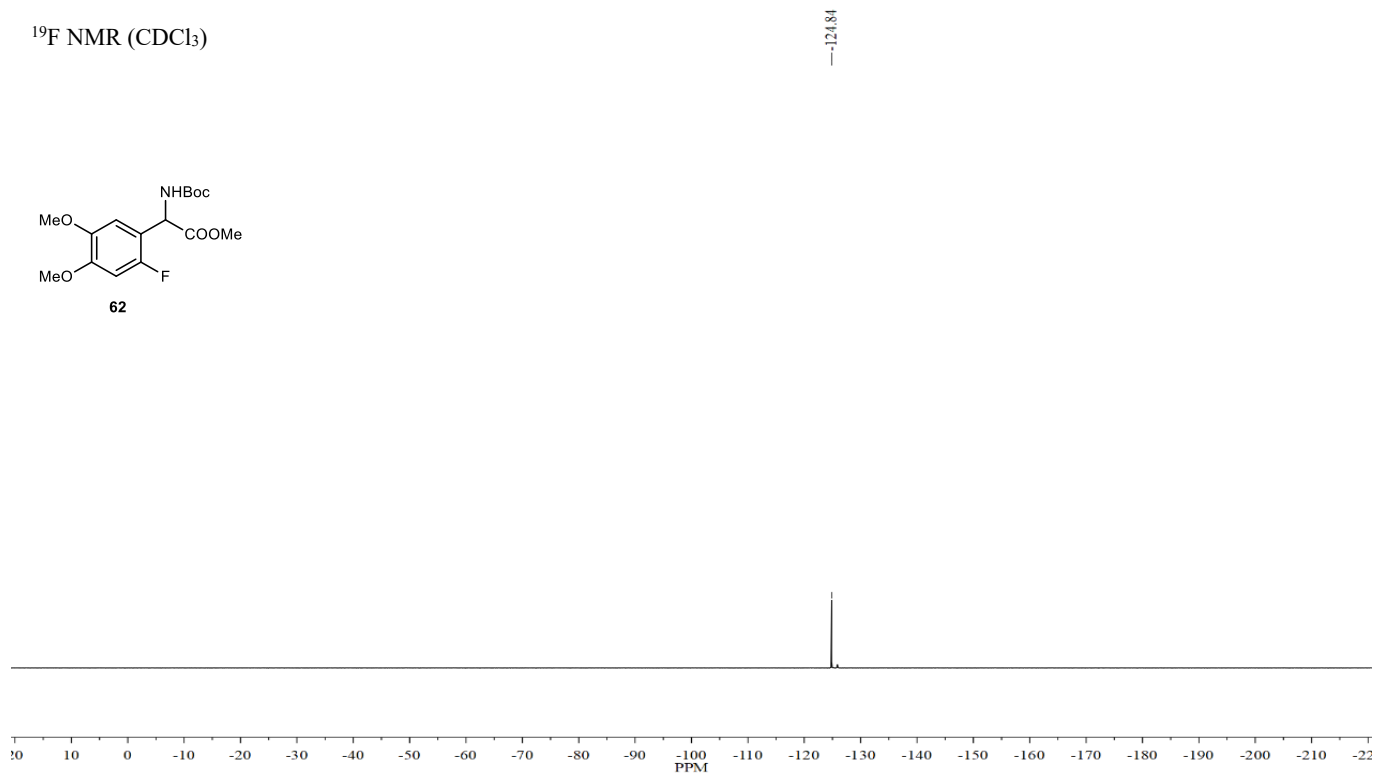

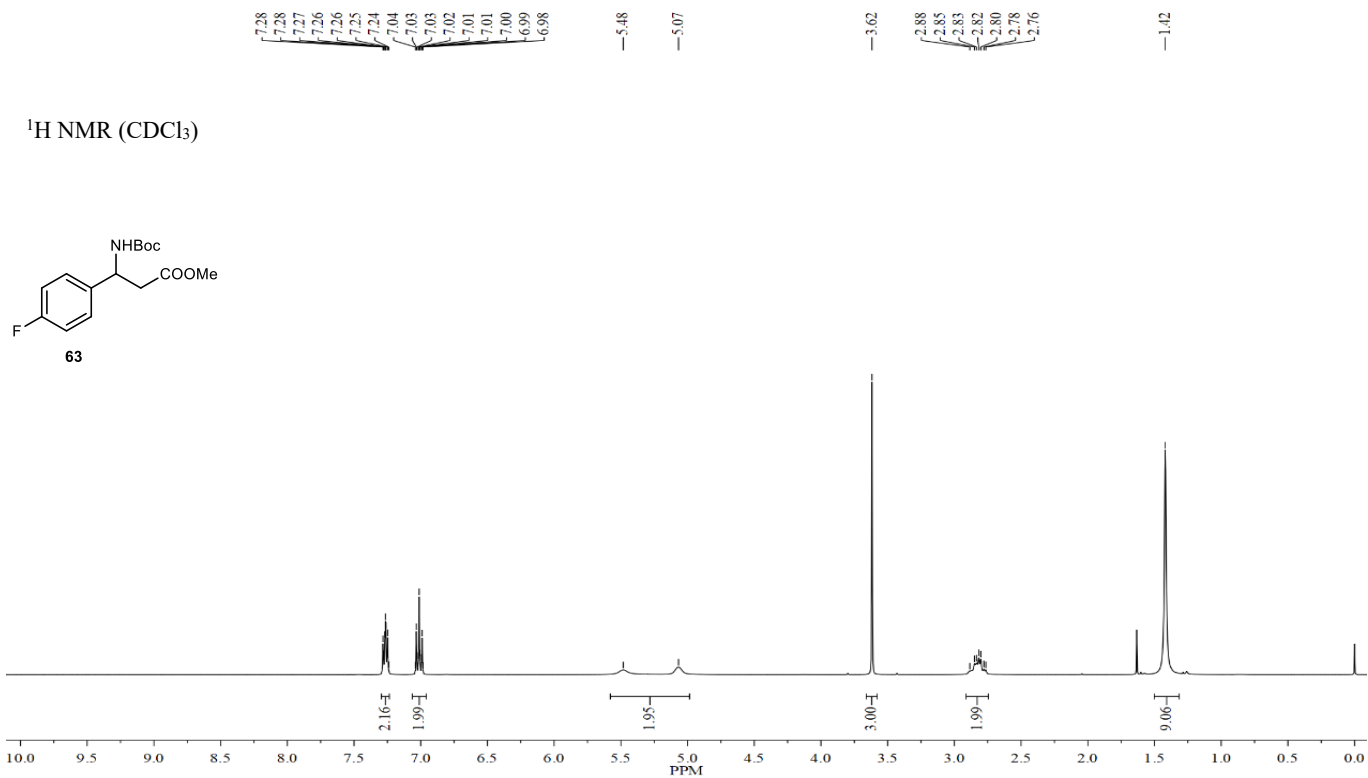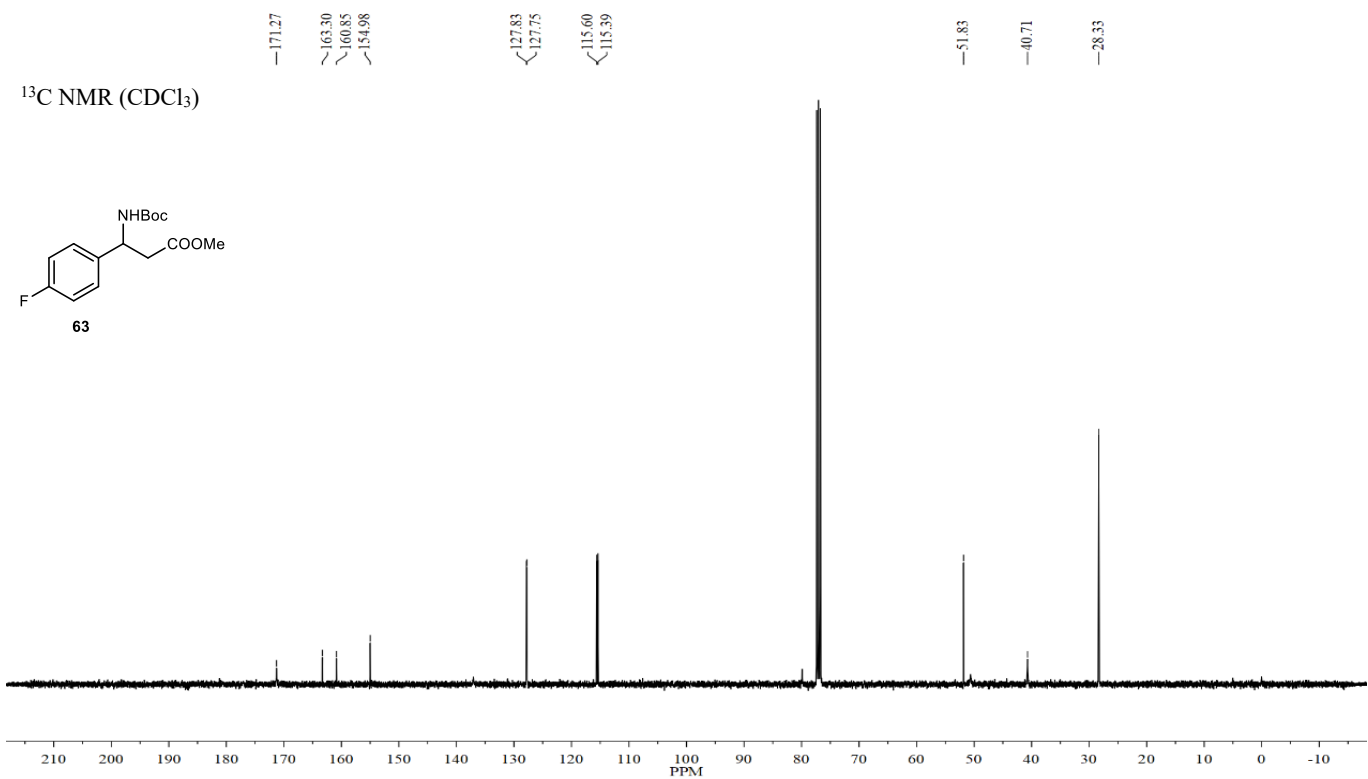

$^{19}\text{F}$  NMR ( $\text{CDCl}_3$ )

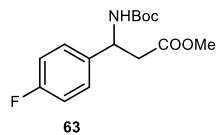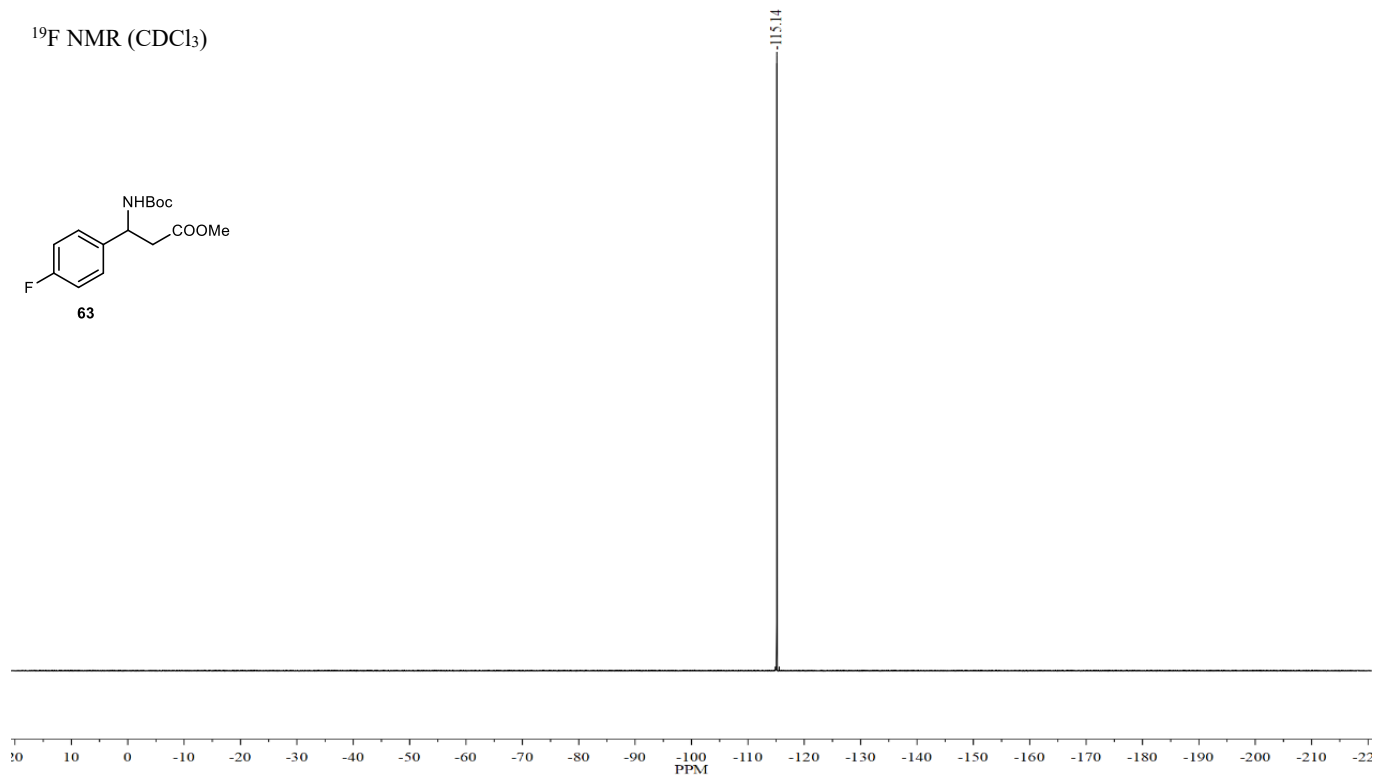

$^1\text{H}$  NMR ( $\text{CDCl}_3$ )

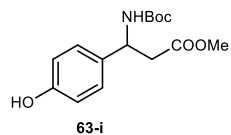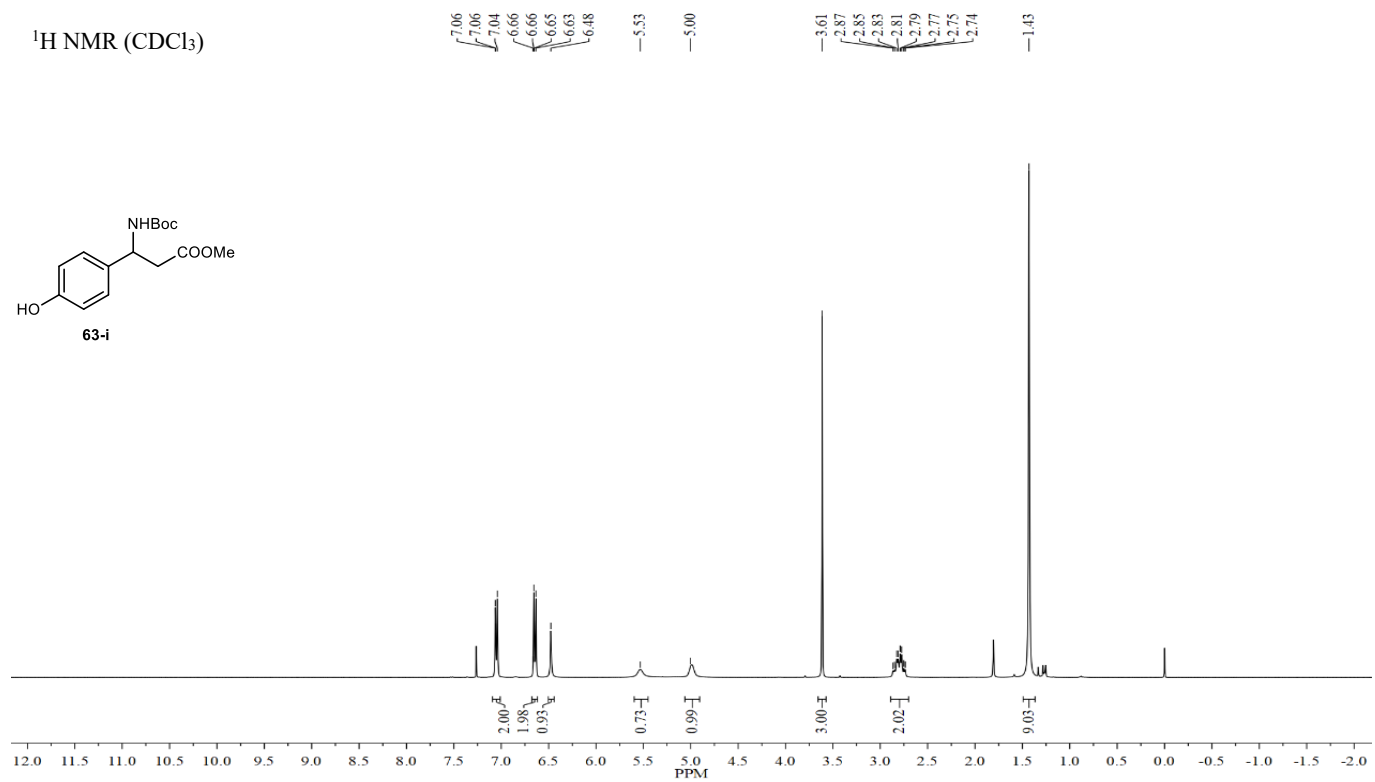

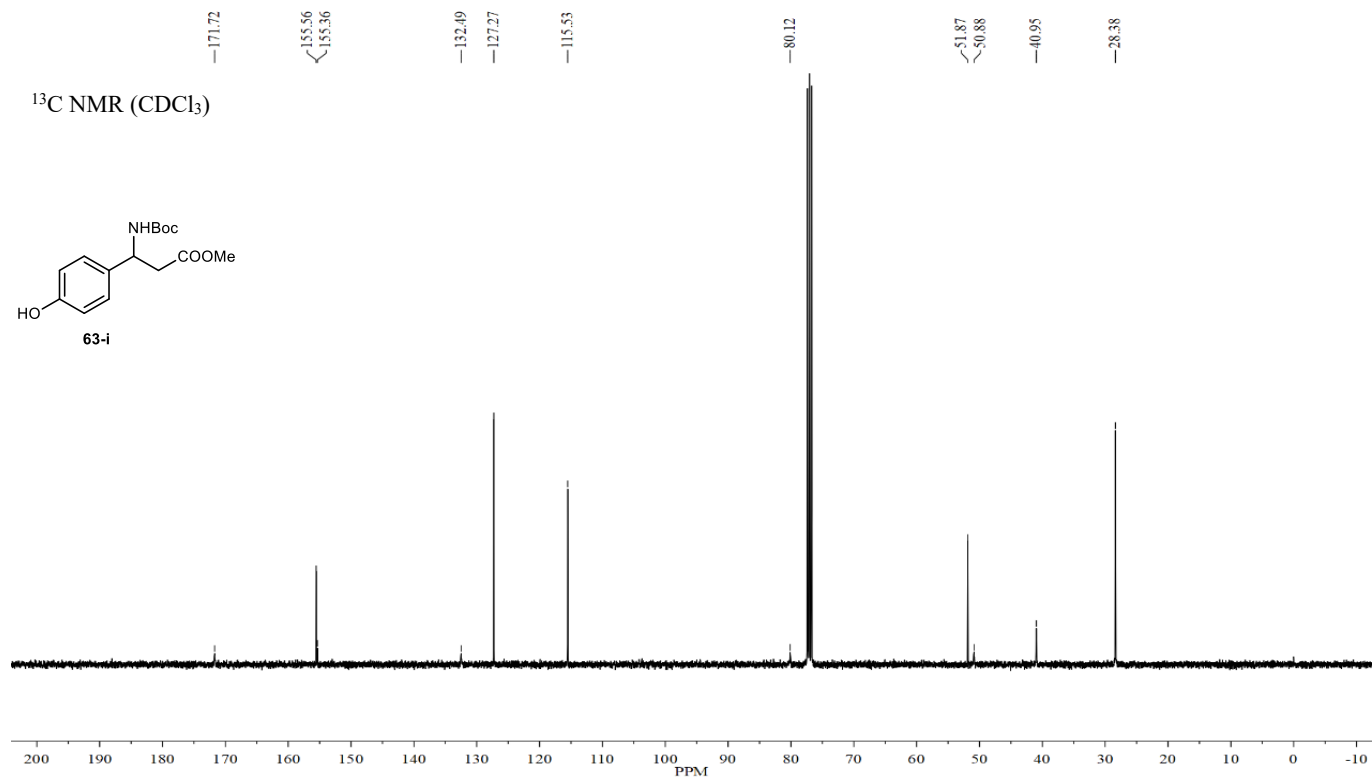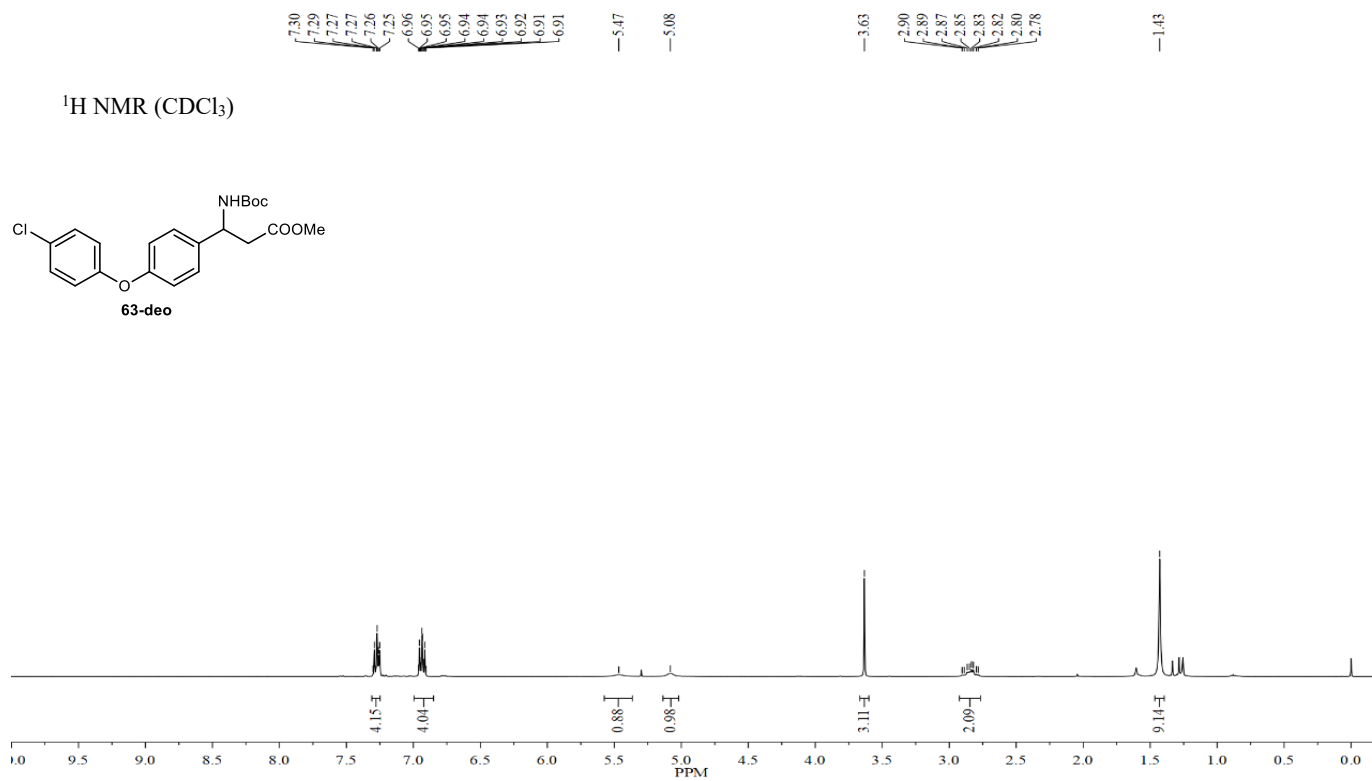

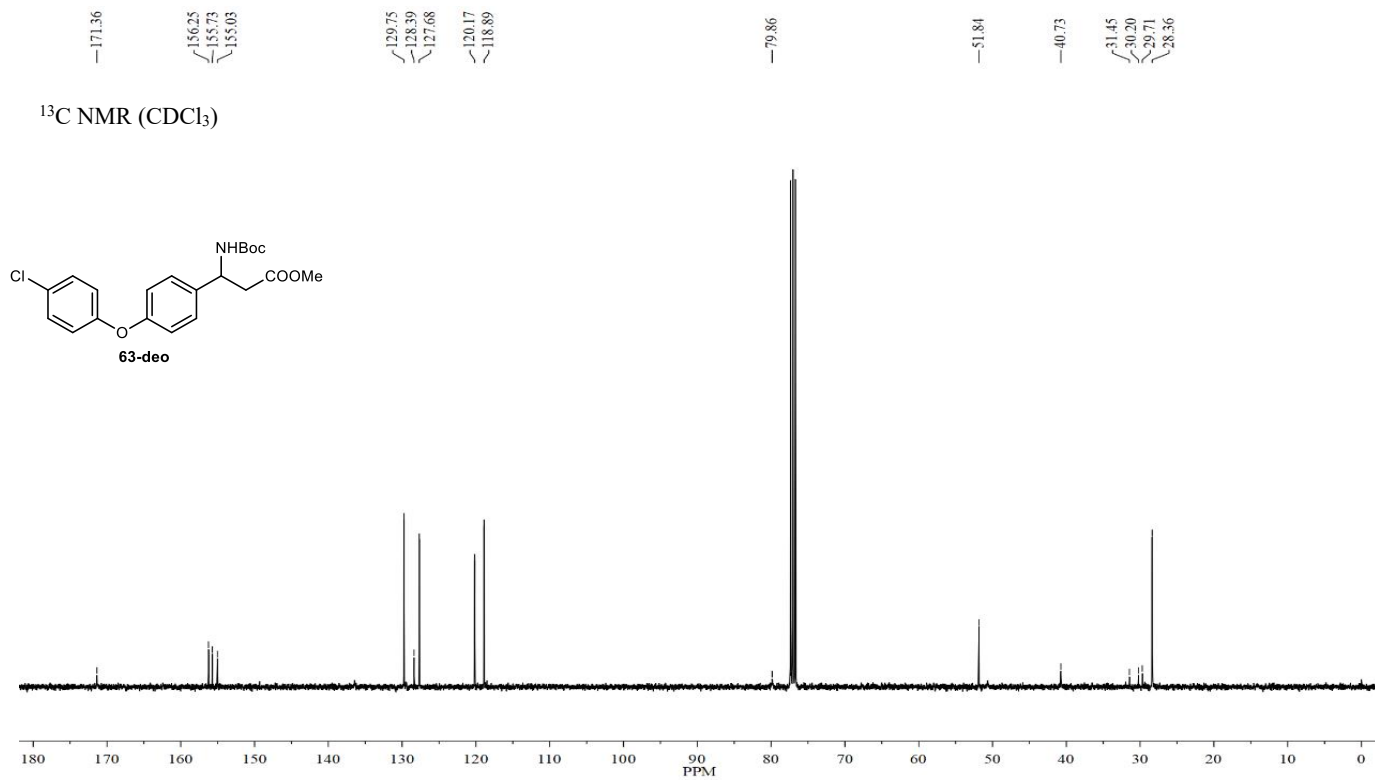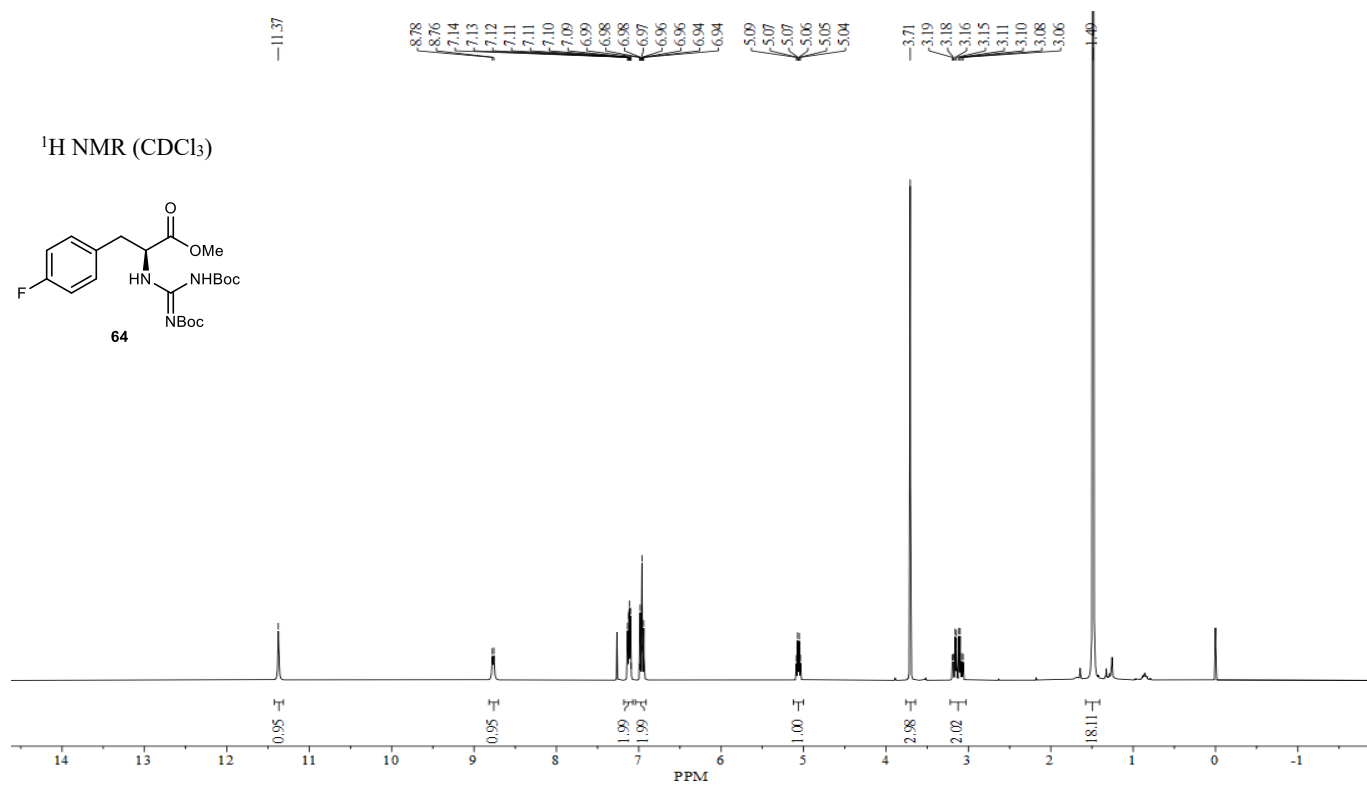

$^{13}\text{C}$  NMR ( $\text{CDCl}_3$ )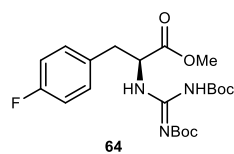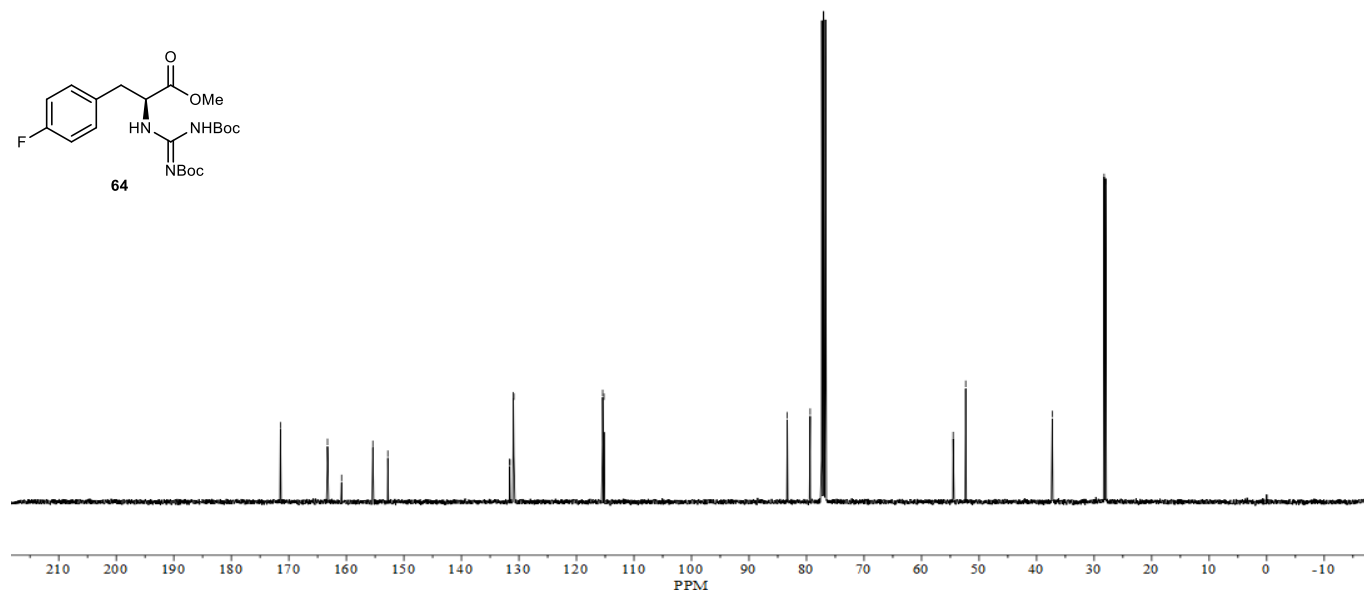 $^{19}\text{F}$  NMR ( $\text{CDCl}_3$ )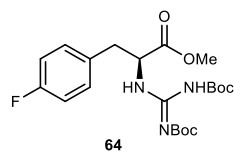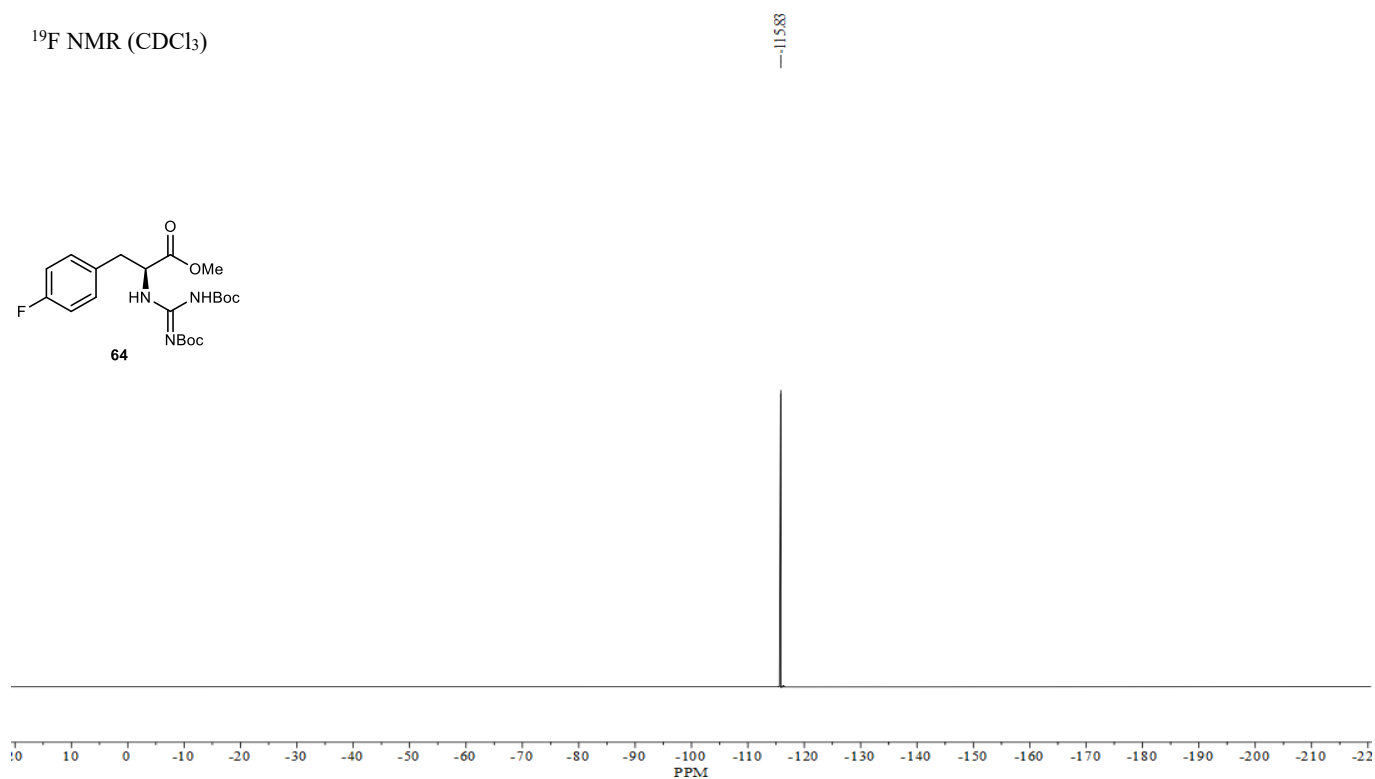

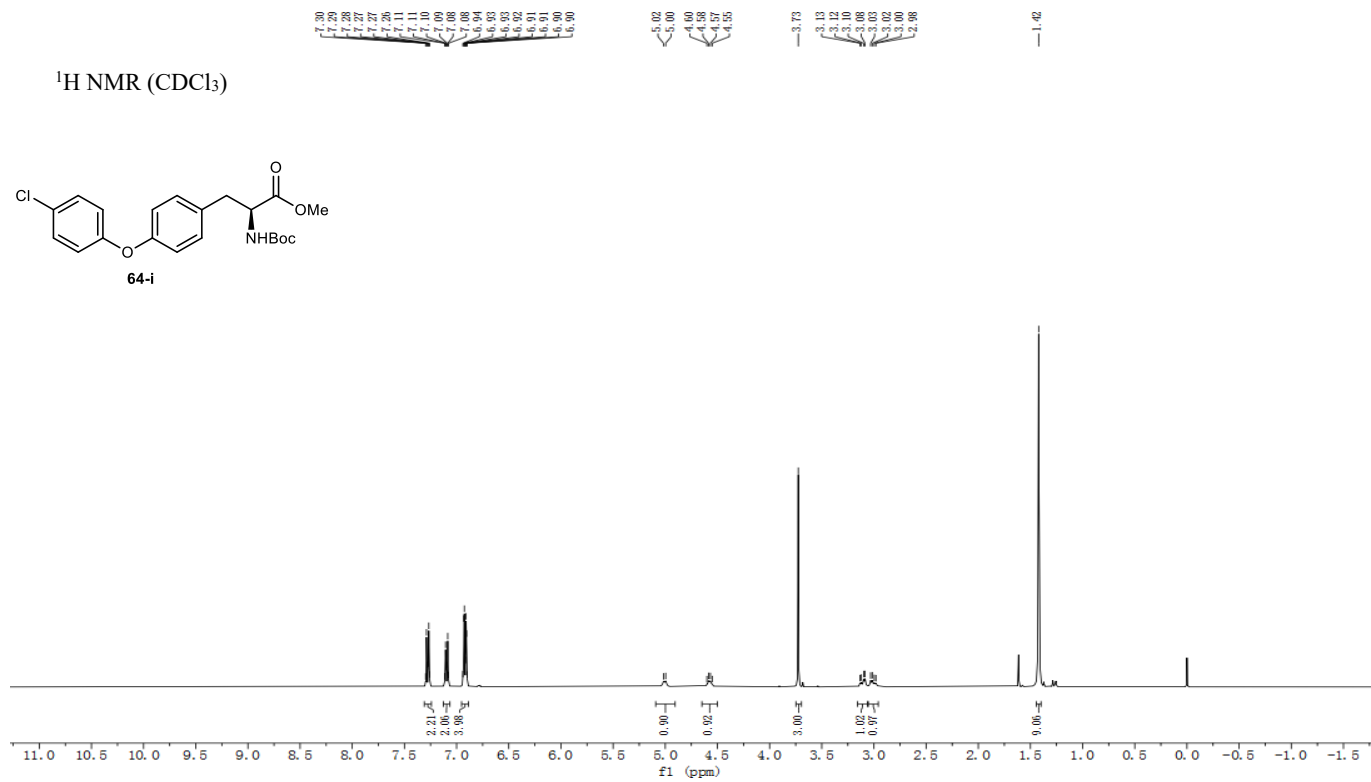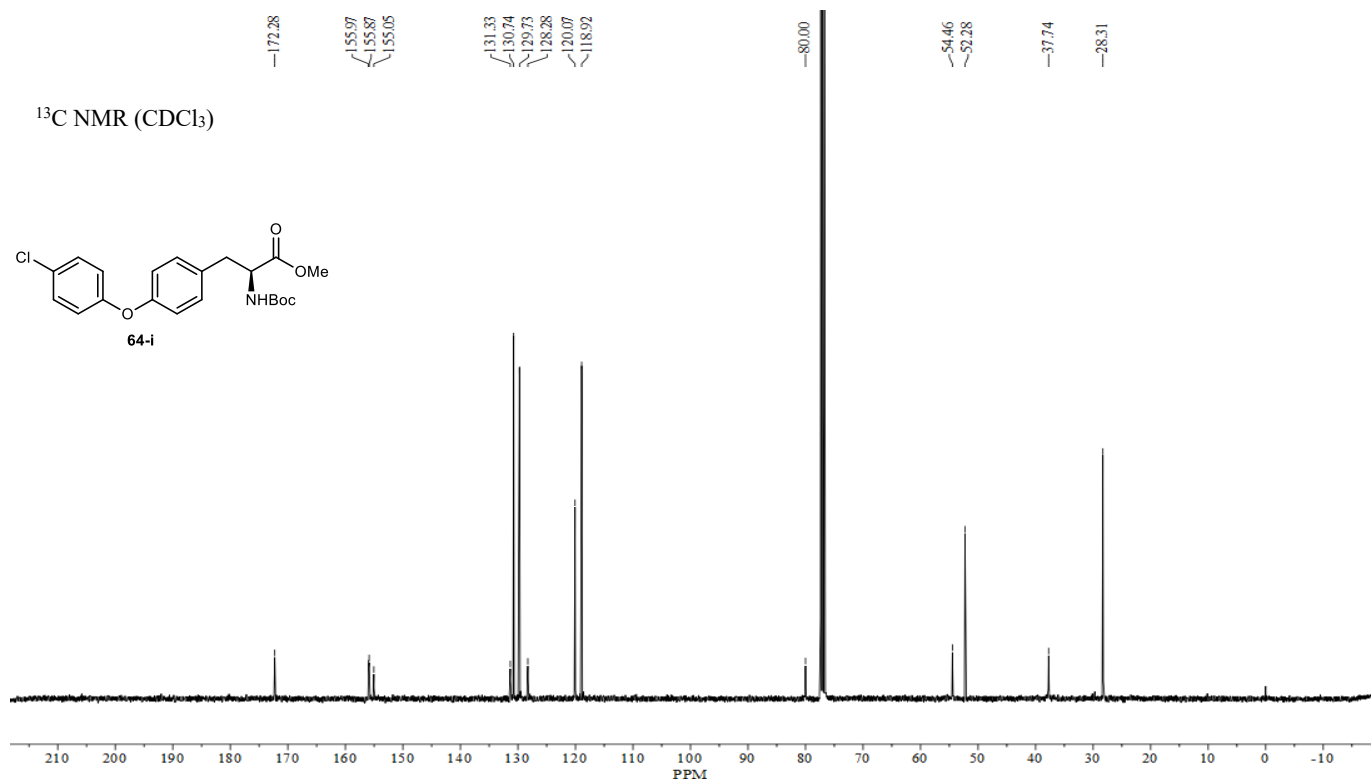



<sup>1</sup>H NMR (CDCl<sub>3</sub>)

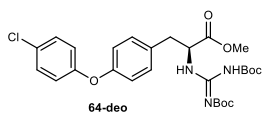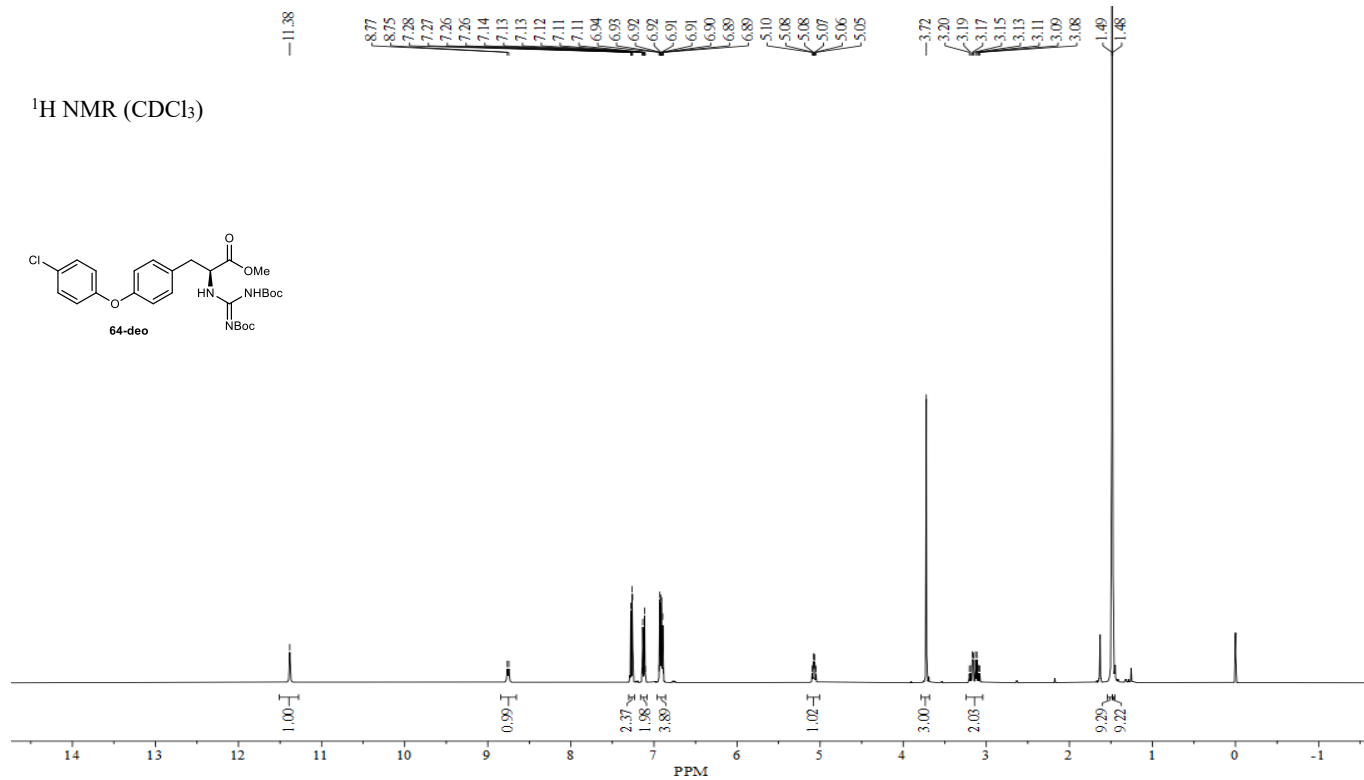

<sup>13</sup>C NMR (CDCl<sub>3</sub>)

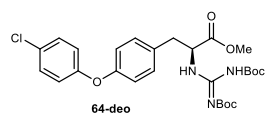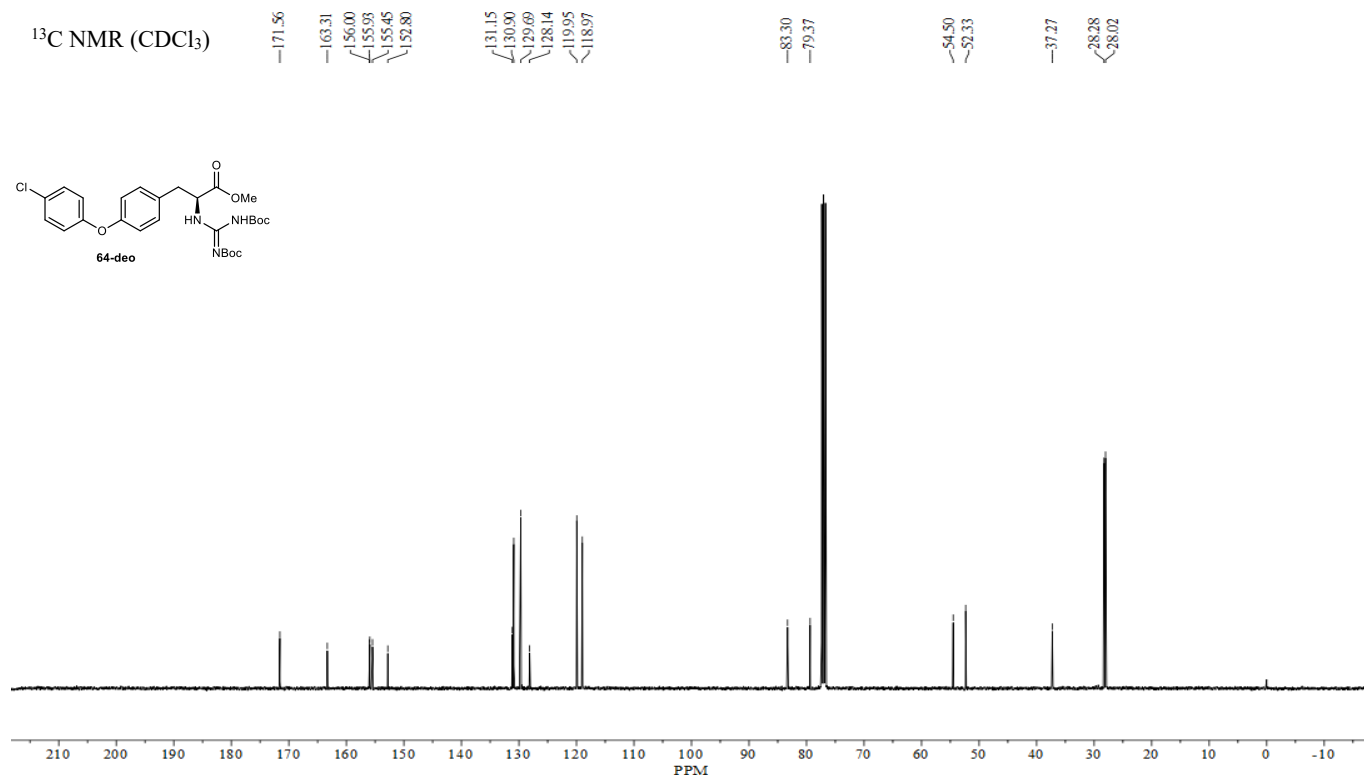

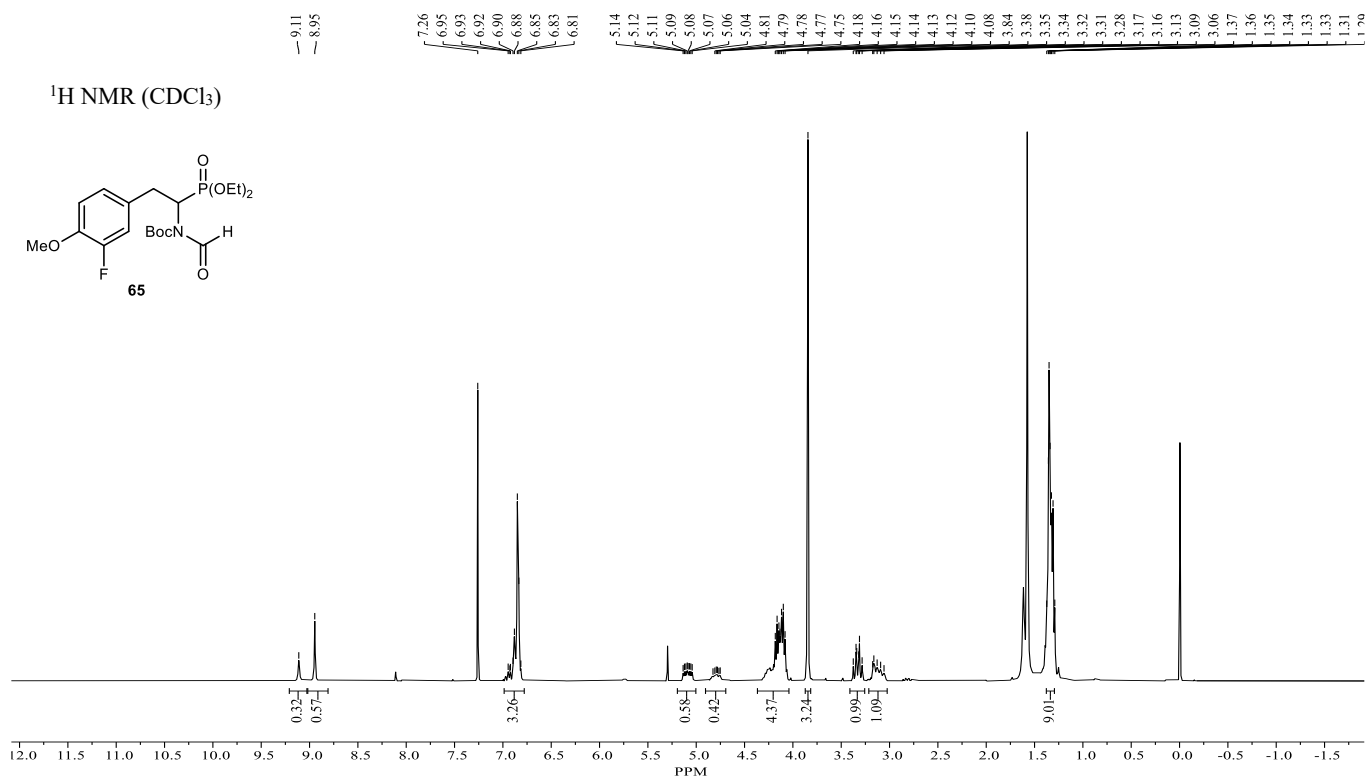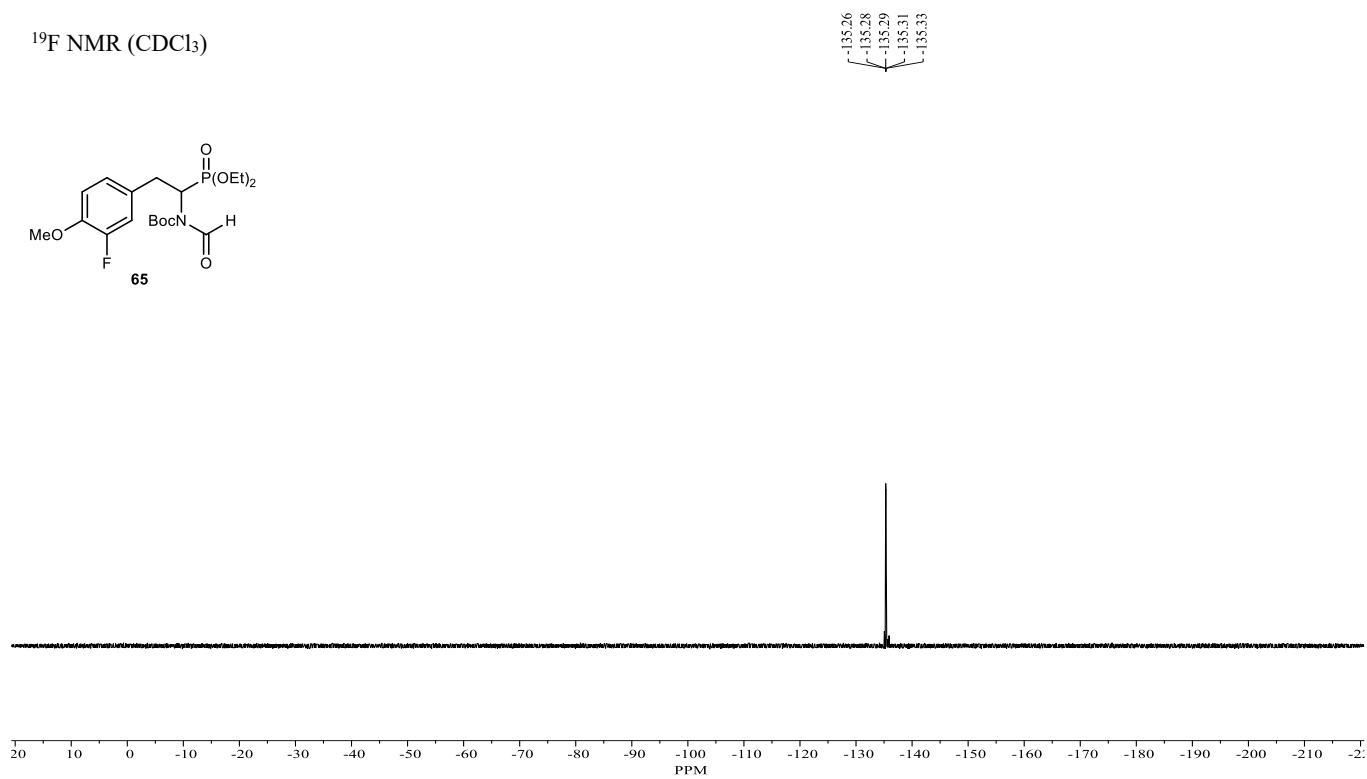

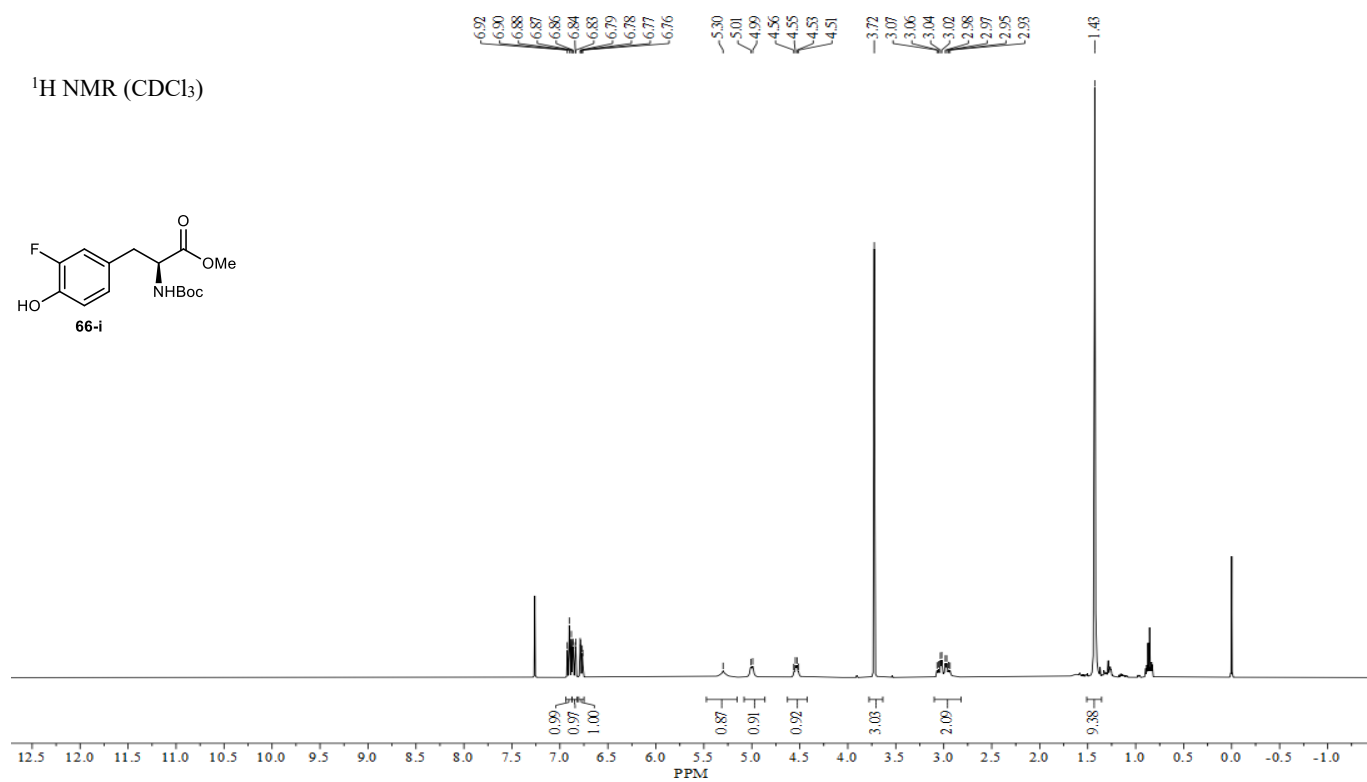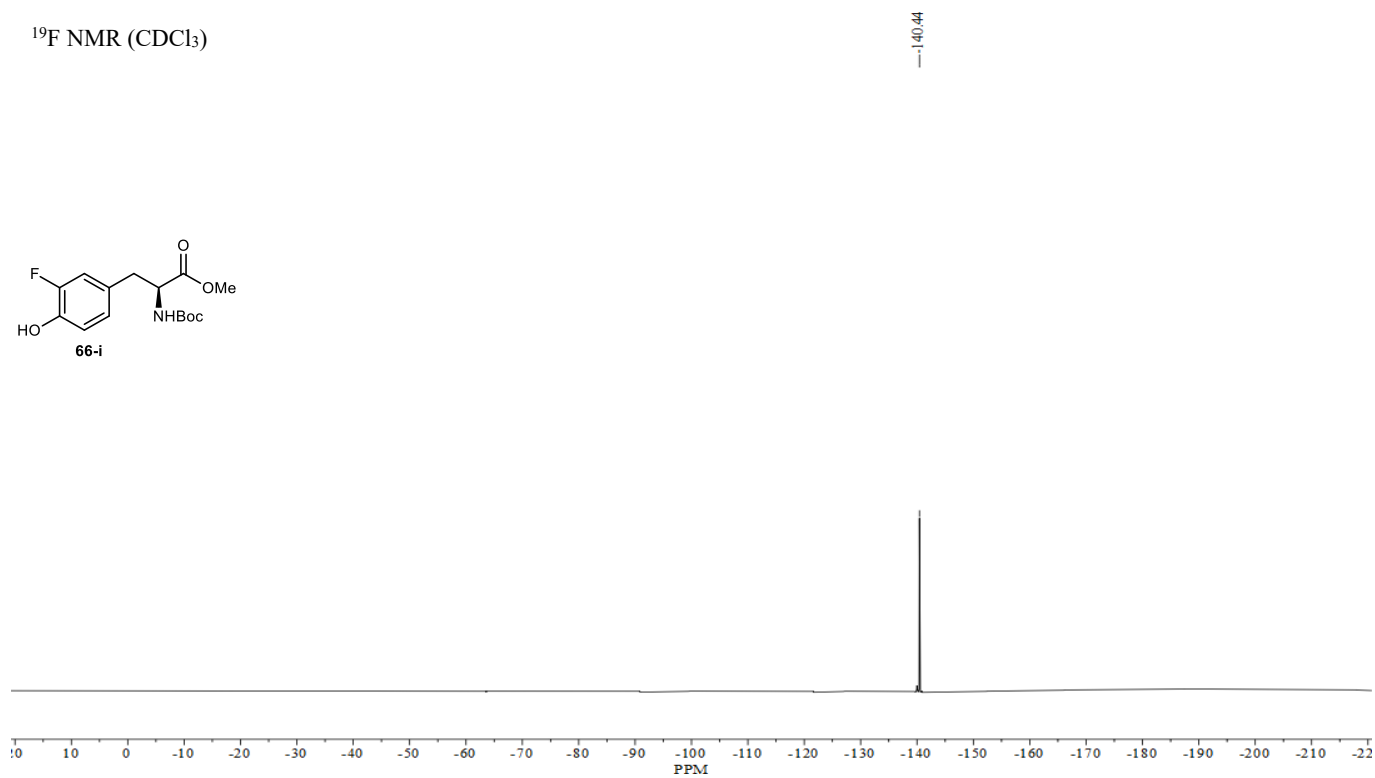

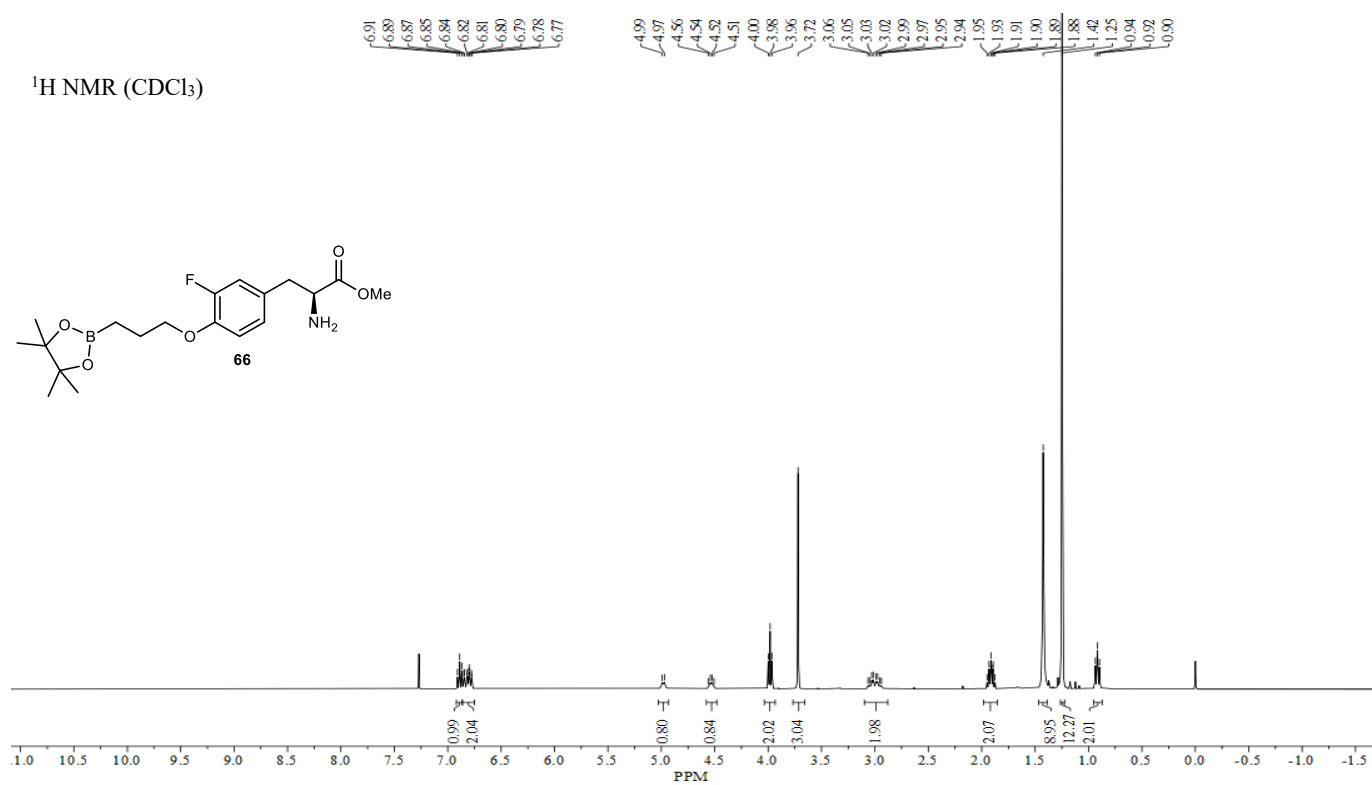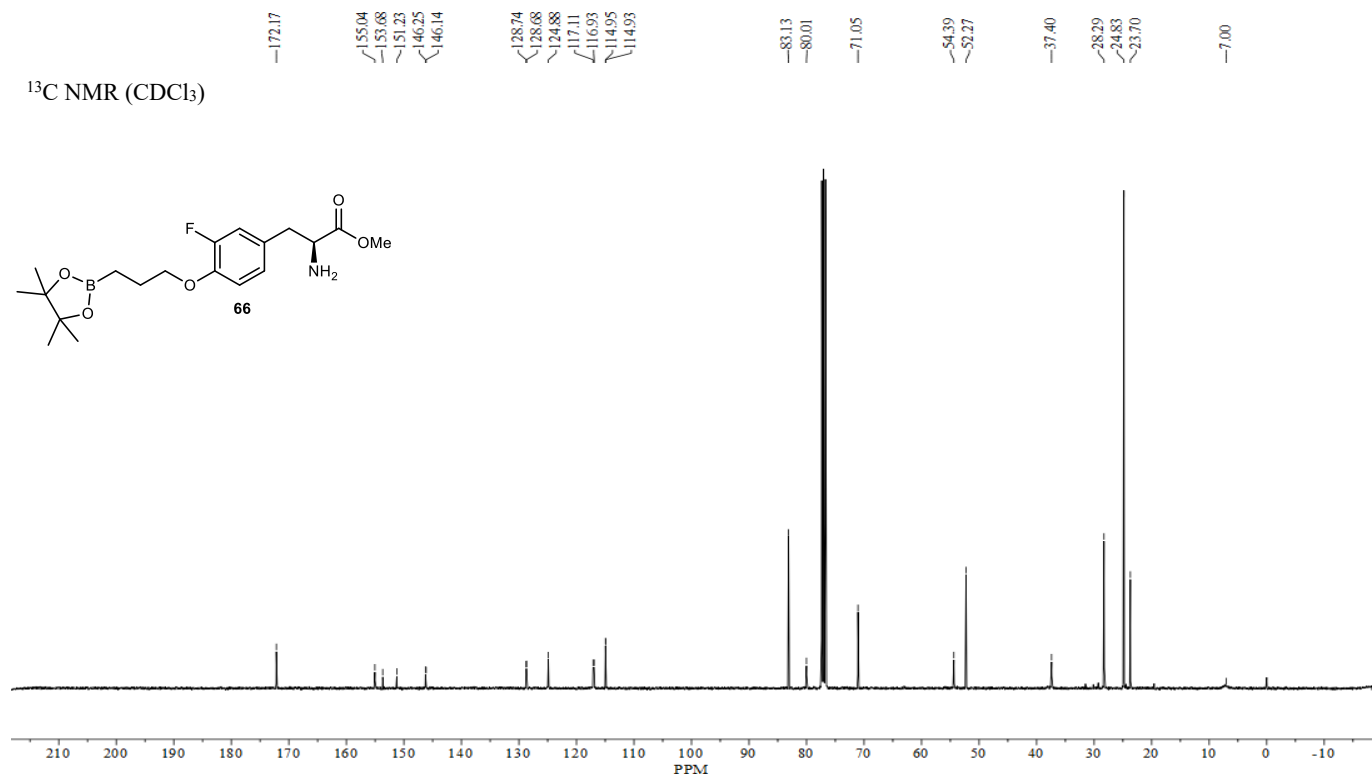

—134.19

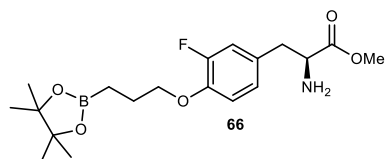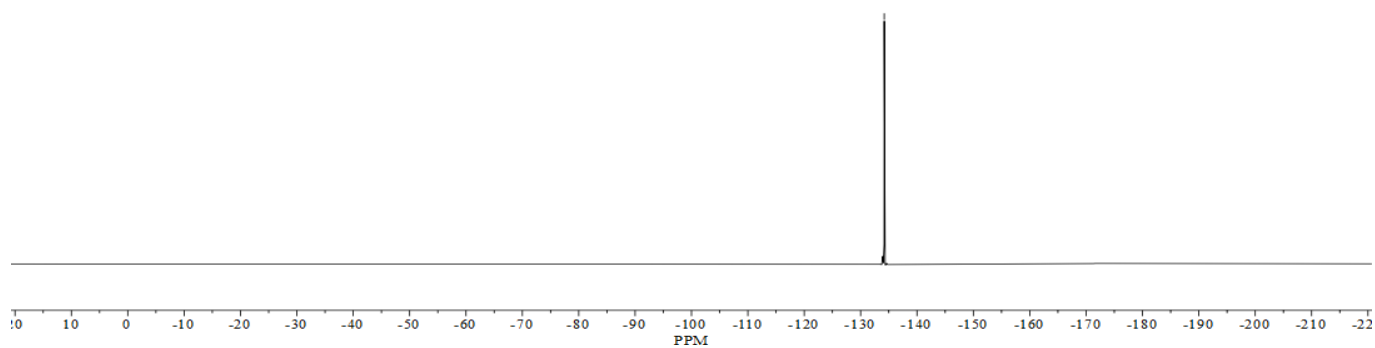

—172.56      157.87  
 155.50  
 155.26  
 153.17

126.79  
 126.71  
 117.80  
 117.57  
 114.20  
 113.98  
 112.26  
 112.18

—83.17  
 —79.62

—70.49

32.80  
 28.27  
 54.24  
 52.13  
 24.85  
 23.67

—7.21

**67**

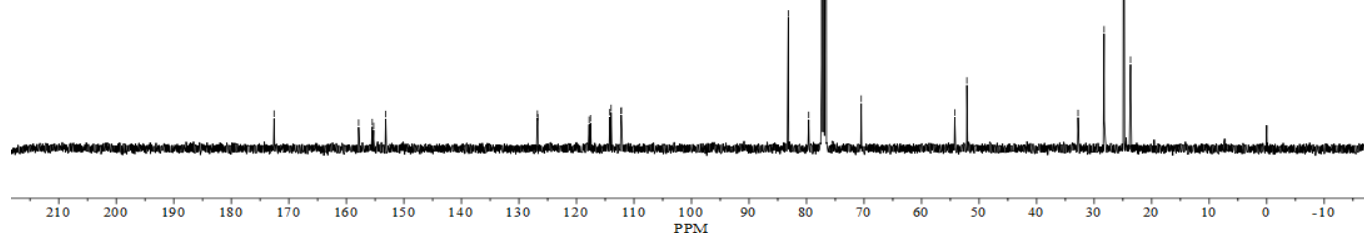<sup>1</sup>H NMR (CDCl<sub>3</sub>)

$^1\text{H}$  NMR ( $\text{CDCl}_3$ )

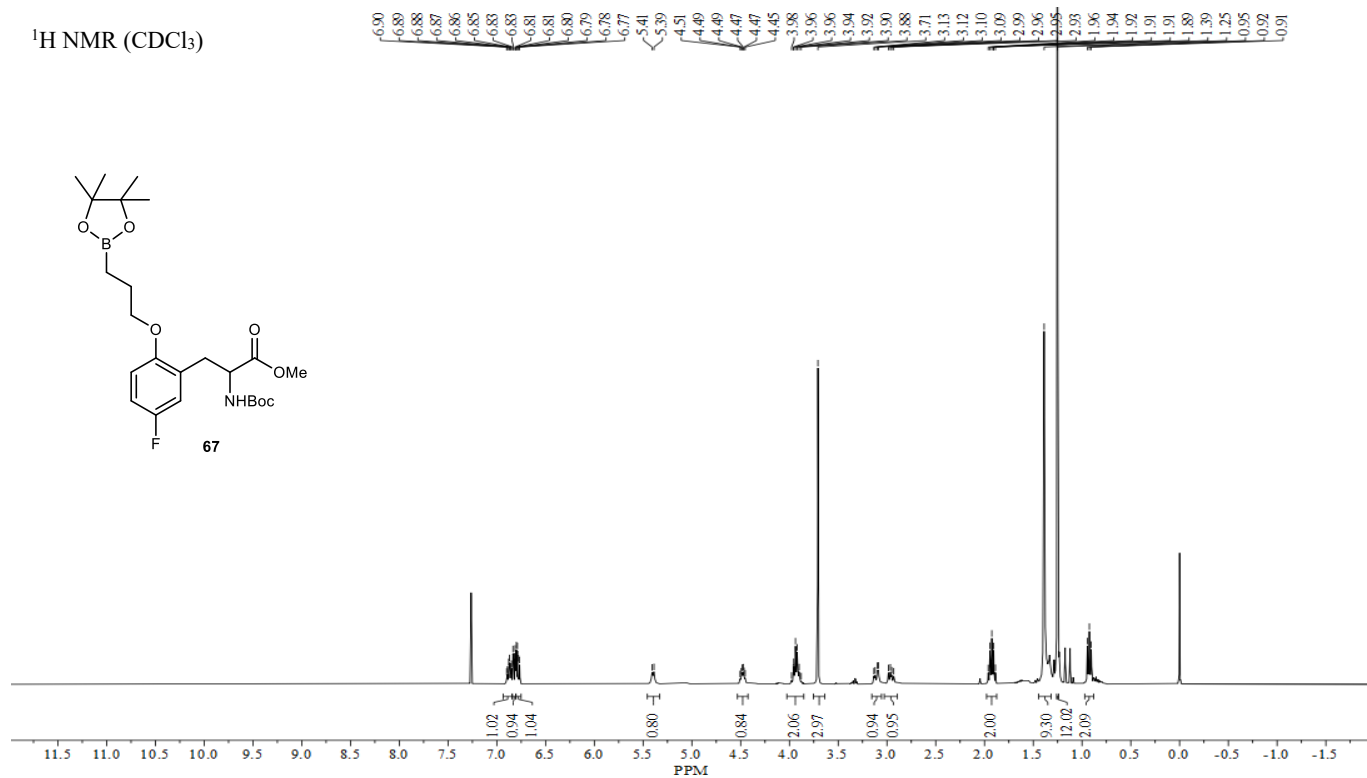

$^{19}\text{F}$  NMR ( $\text{CDCl}_3$ )

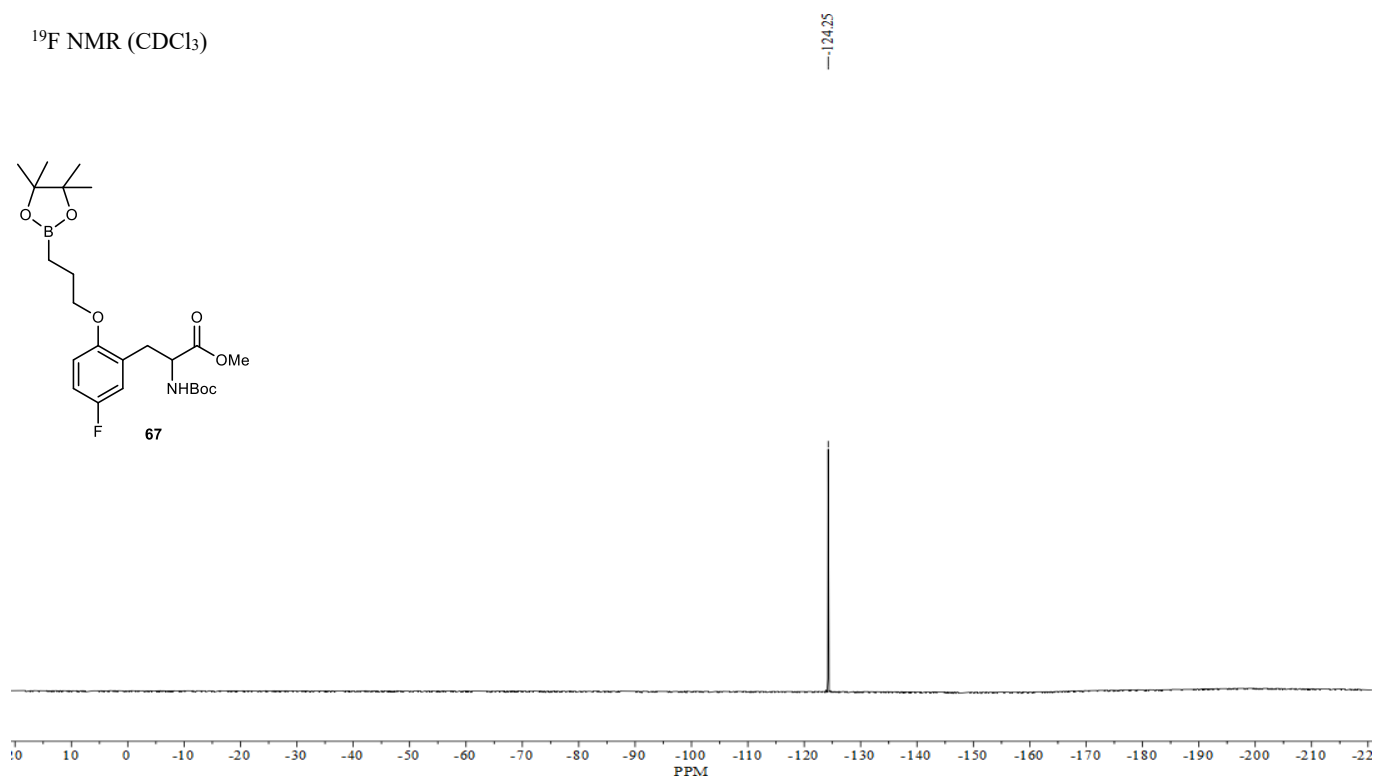

<sup>1</sup>H NMR (CDCl<sub>3</sub>)

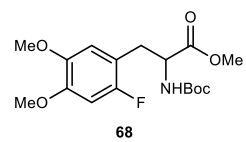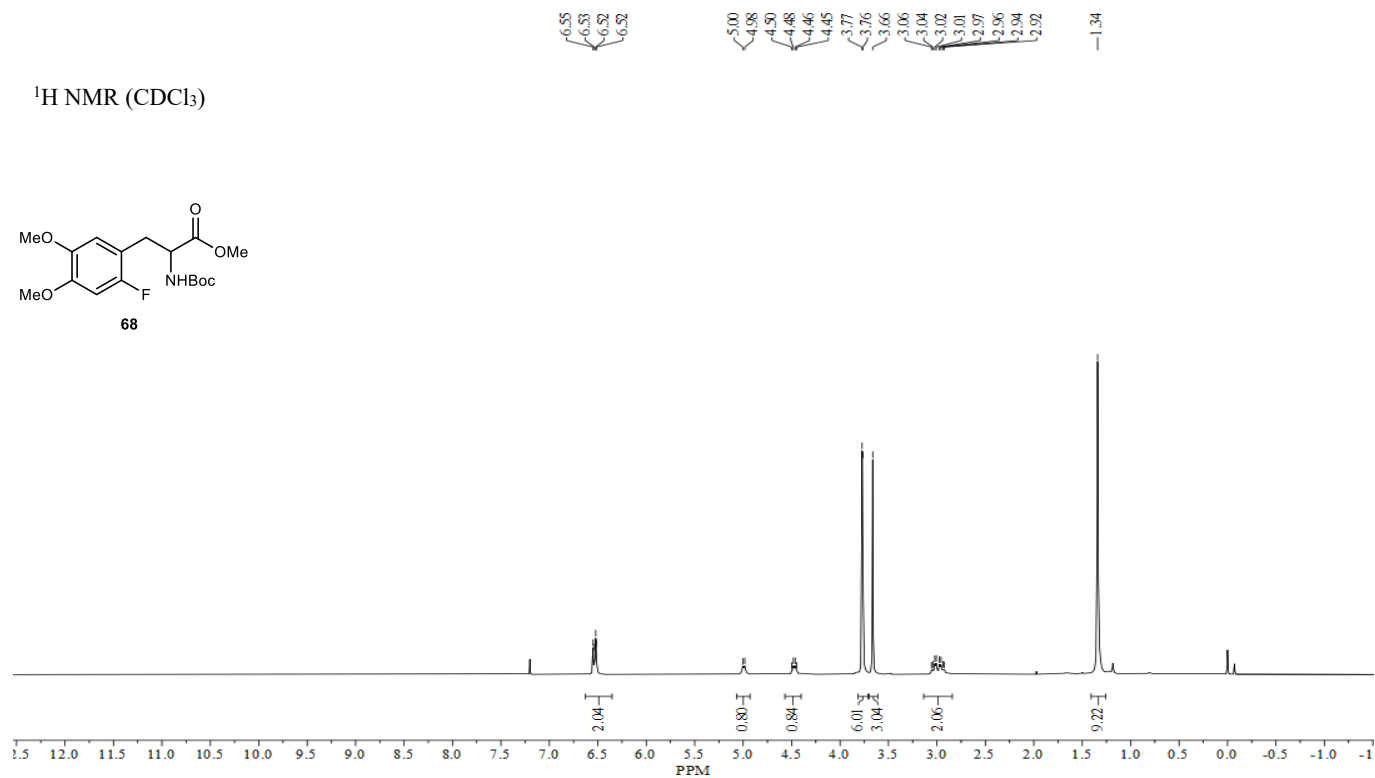

Supplement: Supplementary file 1 [file 179ff0cc99e3b3cc7dd930b6.pdf]
